# Supplementary material for: Risk factors for severity of COVID-19: a rapid review to inform vaccine prioritisation in Canada
Source: PubMed Central journal article supplement — BMJ Open. 2021 May 13;11(5):e044684. doi: 10.1136/bmjopen-2020-044684 (PMC8126435; doi:10.1136/bmjopen-2020-044684), 2021-05-13
Supplement: bmjopen-2020-044684.draft_revisions.pdf [file bmjopen-2020-044684.draft_revisions.pdf]

# BMJ Open

BMJ Open is committed to open peer review. As part of this commitment we make the peer review history of every article we publish publicly available.

When an article is published we post the peer reviewers' comments and the authors' responses online. We also post the versions of the paper that were used during peer review. These are the versions that the peer review comments apply to.

The versions of the paper that follow are the versions that were submitted during the peer review process. They are not the versions of record or the final published versions. They should not be cited or distributed as the published version of this manuscript.

BMJ Open is an open access journal and the full, final, typeset and author-corrected version of record of the manuscript is available on our site with no access controls, subscription charges or pay-per-view fees (<http://bmjopen.bmj.com>).

If you have any questions on BMJ Open's open peer review process please email [info.bmjopen@bmj.com](mailto:info.bmjopen@bmj.com)

# BMJ Open

## Risk factors for severe outcomes of COVID-19: a rapid review

|                               |                                                                                                                                                                                                                                                                                                                                                                                                                                                                                                                                                                                                                                                                                                                                                                                                                                                                                                                                                                                                                                                                                                    |
|-------------------------------|----------------------------------------------------------------------------------------------------------------------------------------------------------------------------------------------------------------------------------------------------------------------------------------------------------------------------------------------------------------------------------------------------------------------------------------------------------------------------------------------------------------------------------------------------------------------------------------------------------------------------------------------------------------------------------------------------------------------------------------------------------------------------------------------------------------------------------------------------------------------------------------------------------------------------------------------------------------------------------------------------------------------------------------------------------------------------------------------------|
| Journal:                      | <i>BMJ Open</i>                                                                                                                                                                                                                                                                                                                                                                                                                                                                                                                                                                                                                                                                                                                                                                                                                                                                                                                                                                                                                                                                                    |
| Manuscript ID                 | bmjopen-2020-044684                                                                                                                                                                                                                                                                                                                                                                                                                                                                                                                                                                                                                                                                                                                                                                                                                                                                                                                                                                                                                                                                                |
| Article Type:                 | Original research                                                                                                                                                                                                                                                                                                                                                                                                                                                                                                                                                                                                                                                                                                                                                                                                                                                                                                                                                                                                                                                                                  |
| Date Submitted by the Author: | 09-Sep-2020                                                                                                                                                                                                                                                                                                                                                                                                                                                                                                                                                                                                                                                                                                                                                                                                                                                                                                                                                                                                                                                                                        |
| Complete List of Authors:     | Wingert, Aireen; University of Alberta Faculty of Medicine and Dentistry, Pediatrics, Alberta Research Centre for Health Evidence<br>Pillay, Jennifer; University of Alberta Faculty of Medicine and Dentistry, Pediatrics, Alberta Research Centre for Health Evidence<br>Gates, Michelle; University of Alberta Faculty of Medicine and Dentistry, Pediatrics, Alberta Research Centre for Health Evidence<br>Guitard, Samantha; University of Alberta Faculty of Medicine and Dentistry, Pediatrics, Alberta Research Centre for Health Evidence<br>Rahman, Sholeh; University of Alberta Faculty of Medicine and Dentistry, Pediatrics, Alberta Research Centre for Health Evidence<br>Beck, Andrew; University of Alberta Faculty of Medicine and Dentistry, Pediatrics, Alberta Research Centre for Health Evidence<br>Vandermeer, Ben; University of Alberta Faculty of Medicine and Dentistry, Pediatrics, Alberta Research Centre for Health Evidence<br>Hartling, Lisa; University of Alberta Faculty of Medicine and Dentistry, Pediatrics, Alberta Research Centre for Health Evidence |
| Keywords:                     | COVID-19, EPIDEMIOLOGY, Public health < INFECTIOUS DISEASES, INTENSIVE & CRITICAL CARE                                                                                                                                                                                                                                                                                                                                                                                                                                                                                                                                                                                                                                                                                                                                                                                                                                                                                                                                                                                                             |
|                               |                                                                                                                                                                                                                                                                                                                                                                                                                                                                                                                                                                                                                                                                                                                                                                                                                                                                                                                                                                                                                                                                                                    |

SCHOLARONE™  
Manuscripts

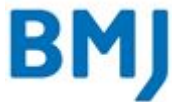

I, the Submitting Author has the right to grant and does grant on behalf of all authors of the Work (as defined in the below author licence), an exclusive licence and/or a non-exclusive licence for contributions from authors who are: i) UK Crown employees; ii) where BMJ has agreed a CC-BY licence shall apply, and/or iii) in accordance with the terms applicable for US Federal Government officers or employees acting as part of their official duties; on a worldwide, perpetual, irrevocable, royalty-free basis to BMJ Publishing Group Ltd ("BMJ") its licensees and where the relevant Journal is co-owned by BMJ to the co-owners of the Journal, to publish the Work in this journal and any other BMJ products and to exploit all rights, as set out in our [licence](#).

The Submitting Author accepts and understands that any supply made under these terms is made by BMJ to the Submitting Author unless you are acting as an employee on behalf of your employer or a postgraduate student of an affiliated institution which is paying any applicable article publishing charge ("APC") for Open Access articles. Where the Submitting Author wishes to make the Work available on an Open Access basis (and intends to pay the relevant APC), the terms of reuse of such Open Access shall be governed by a Creative Commons licence – details of these licences and which [Creative Commons](#) licence will apply to this Work are set out in our licence referred to above.

Other than as permitted in any relevant BMJ Author's Self Archiving Policies, I confirm this Work has not been accepted for publication elsewhere, is not being considered for publication elsewhere and does not duplicate material already published. I confirm all authors consent to publication of this Work and authorise the granting of this licence.

1  
2  
3 **Title:** Risk factors for severe outcomes of COVID-19: a rapid review  
4

5  
6 **Authors:** Aireen Wingert, Jennifer Pillay, Michelle Gates, Samantha Guitard, Sholeh Rahman, Andrew  
7 Beck, Ben Vandermeer, Lisa Hartling  
8

9  
10 Aireen Wingert (corresponding), Alberta Research Centre for Health Evidence, Department of Pediatrics,  
11 University of Alberta (Project Coordinator), [awingert@ualberta.ca](mailto:awingert@ualberta.ca)

12 Jennifer Pillay, Alberta Research Centre for Health Evidence, Department of Pediatrics, University of  
13 Alberta Edmonton Clinic Health Academy, 11405-87 Avenue NW, Edmonton, Alberta, Canada  
14 T6G 1C9 (Research Project Coordinator), [jpillay@ualberta.ca](mailto:jpillay@ualberta.ca)  
15

16 Michelle Gates, Alberta Research Centre for Health Evidence, Department of Pediatrics, University of  
17 Alberta (Project Coordinator), [mgates1@ualberta.ca](mailto:mgates1@ualberta.ca)  
18

19 Samantha Guitard, Alberta Research Centre for Health Evidence, Department of Pediatrics, University of  
20 Alberta (Research Assistant), [guitard@ualberta.ca](mailto:guitard@ualberta.ca)

21 Sholeh Rahman, Alberta Research Centre for Health Evidence, Department of Pediatrics, University of  
22 Alberta (Research Assistant), [sholeh1@ualberta.ca](mailto:sholeh1@ualberta.ca)  
23

24 Andrew Beck, Alberta Research Centre for Health Evidence (Research Assistant), [abeck@ohri.ca](mailto:abeck@ohri.ca)

25 Ben Vandermeer, Alberta Research Centre for Health Evidence, Department of Pediatrics, University of  
26 Alberta (Biostatistician), [bv1@ualberta.ca](mailto:bv1@ualberta.ca)  
27

28 Lisa Hartling, Director, Alberta Research Centre for Health Evidence, Department of Pediatrics,  
29 University of Alberta, [hartling@ualberta.ca](mailto:hartling@ualberta.ca)  
30

31 **Contributors:**

32 AW, JP, AB, BV and LH contributed to the conception and design of the study. AW, JP, SG, SR, AB, and BV  
33 contributed to the screening of eligible studies. AW, SG, SR, and AB contributed to the acquisition of  
34 data. AW, JP, MG, BV and LH contributed to the synthesis and interpretation of data. AW, JP, MG,  
35 drafted the manuscript. AW, JP, MG, SG, SR, AB, BV, and LH revised the manuscript for important  
36 intellectual content. All authors approved the manuscript for submission.  
37  
38  
39

40 **Copyright/licence for publication:** The Corresponding Author has the right to grant on behalf of all  
41 authors and does grant on behalf of all authors, a worldwide licence to the Publishers and its licencees in  
42 perpetuity, in all forms, formats and media (whether known now or created in the future), to i) publish,  
43 reproduce, distribute, display and store the Contribution, ii) translate the Contribution into other  
44 languages, create adaptations, reprints, include within collections and create summaries, extracts  
45 and/or, abstracts of the Contribution, iii) create any other derivative work(s) based on the Contribution,  
46 iv) to exploit all subsidiary rights in the Contribution, v) the inclusion of electronic links from the Con-  
47 tribution to third party material where—ever it may be located; and, vi) licence any third party to do any  
48 or all of the above.  
49  
50  
51

52  
53 **Patient consent:** Not required.  
54  
55  
56  
57  
58  
59  
60

1  
2  
3 **Competing interests declaration:** All authors have completed the ICMJE uniform disclosure form at  
4 [www.icmje.org/coi\\_disclosure.pdf](http://www.icmje.org/coi_disclosure.pdf) and declare: grants from the National Advisory Committee on  
5 Immunization during the conduct of the study; no other relationships or activities that could appear to  
6 have influenced the submitted work. LH is supported by a Canada Research Chair in Knowledge  
7 Synthesis and Translation.  
8  
9

10  
11 **Data sharing statement:** No additional data available; all data used in this review are available within  
12 the manuscript and accompanying supplemental files.  
13

14 **Word count (main text): 3,858**  
15  
16  
17  
18  
19  
20  
21  
22  
23  
24  
25  
26  
27  
28  
29  
30  
31  
32  
33  
34  
35  
36  
37  
38  
39  
40  
41  
42  
43  
44  
45  
46  
47  
48  
49  
50  
51  
52  
53  
54  
55  
56  
57  
58  
59  
60

For peer review only

**ABSTRACT: 300 words**

**Background:** Identification of high-risk groups is needed to inform COVID-19 vaccine prioritization strategies in Canada. A rapid review was conducted to determine the magnitude of association between potential risk factors and severe outcomes of COVID-19.

**Methods:** Ovid MEDLINE(R) ALL, Epistemonikos COVID-19 in L-OVE Platform, McMaster COVID-19 Evidence Alerts, and select websites were searched to 15 June 2020. Studies needed to be conducted in high-income countries and have used multivariate analyses. After piloting, screening, data extraction, and quality appraisal were performed by a single reviewer. Authors synthesized the findings narratively and appraised the certainty of the evidence for each risk factor-outcome association.

**Results:** Of 3,740 records identified, 34 studies were included that reported on median 596 (range 44-418,794) participants, aged 42 to 84 years. 17/34 (50%) were conducted in the United States. 19/34 (56%) were good quality. There was low or moderate certainty evidence for a large ( $\geq 2$ -fold) association with risk of hospitalization in people with COVID-19, for the following risk factors: obesity class III, heart failure, diabetes, chronic kidney disease, dementia, age  $>45$  years, male gender, Black race/ethnicity (vs. non-Hispanic white), homelessness, and low income. Age  $>60$  and  $>70$  years may be associated with large increases in the rate of mechanical ventilation and severe disease, respectively. For mortality, a large association with increased risk may exist for liver disease, Bangladeshi ethnicity (vs. British white), age  $>45$  years, age  $>80$  years (vs. 65-69 years), and male gender among 20-64 year-olds (but not older). Associations with hospitalization and mortality may be very large ( $\geq 5$ -fold increased risk) for those aged  $>60$  years.

**Conclusion:** Increasing age (especially  $>60$  years) may be the most important risk factor for severe COVID-19. High-quality primary research (accounting for multiple confounders) is needed to better understand the level of risk potentially associated with other risk factors.

**PROSPERO registration:** CRD42020198001

**Strengths and limitations of this study**

- This rapid review is a comprehensive synthesis of high-quality primary research on risk factors associated with severe COVID-19 outcomes that is most applicable to high-income countries.
- The findings indicate that advancing age ( $\geq 45$  years and especially  $\geq 60$  years) may be the most important risk factor for hospitalization and mortality from COVID-19.
- Other important risk factors for severe disease include several pre-existing chronic conditions (class III obesity, heart failure, diabetes, chronic kidney disease, liver disease, dementia), male gender, Black race/ethnicity (vs. non-Hispanic white), Bangladeshi ethnicity (vs. British white), low income (vs. high), and homelessness.
- The conclusions of this rapid review should be interpreted cautiously in light of multiple unmeasured confounders.
- There is a need for high quality primary research to better understand the level of risk that may be associated with several understudied risk factors.

## INTRODUCTION

Novel coronavirus disease 2019 (COVID-19) is an infectious respiratory disease caused by the newly identified Severe Acute Respiratory Syndrome-Coronavirus-2 (SARS-CoV-2),[1] which reached worldwide pandemic status in early March 2020.[2] As of August 24, there were over 23 million confirmed cases worldwide and 800,000 deaths attributed to the virus.[3] Most people who develop COVID-19 will experience mild-to-moderate illness primarily affecting the respiratory system and recover at home.[4] In more severe cases, patients may require specialized care (e.g., admission to hospital and/or intensive care unit [ICU], assisted ventilation)[5] as the disease can progress to respiratory failure and/or affect multiple organ systems.[4] Though new primary research is emerging rapidly, the evidence is fragmented and consensus on who might be at increased risk of severe outcomes from COVID-19 has not been established.

Given the rapid spread of COVID-19 since its first emergence in late 2019, and potential for severe illness (including death), the development of a preventive vaccine has become a global priority.[6] COVID-19 vaccine development has been progressing at an unprecedented pace. Once a successful COVID-19 vaccine candidate becomes available, the initial vaccine supply is not expected to be sufficient to cover the entire population right away. Therefore, there is an urgent need to plan for the efficient, effective, and equitable allocation of eventual COVID-19 vaccines when limited initial vaccine supply will necessitate recommendations for the vaccination of certain groups earlier than others. Due to the novel nature of COVID-19, these groups for early vaccination have not yet been established.[7]

The National Advisory Committee on Immunization (NACI) is an expert advisory body that provides advice on the use of vaccines in Canada.[8] At the time of writing, NACI is developing interim guidance on priority pandemic immunization strategies for COVID-19 vaccination when initial vaccine supply is limited.[7] To inform this guidance, NACI is using its recently published Ethics, Equity, Feasibility and Acceptability (EEFA) Framework[9] to ensure these factors are systematically and comprehensively considered. One of the evidence informed tools that make up this framework is the “Equity Matrix” which has adapted the PROGRESS-Plus model of health determinants and outcomes[10] to ensure important vaccine-specific equity factors are explicitly included. The resulting “P<sup>2</sup>ROGRESS And Other Factors” framework includes a range of biological and social factors that likely contribute to inequities in health outcomes across population groups, but it is not yet clear how each factor might apply to COVID-19 outcomes. A discussion on the use of this Equity Matrix, with evidence from this rapid review, as a critical tool to guide the ethically just allocation of scarce resources is published elsewhere.[11]

With the aim of providing timely, evidence-informed guidance on pandemic vaccine prioritization, NACI required a rigorous and expedited synthesis of the available evidence on population groups who are at increased risk of severe illness and mortality as a result of COVID-19. Responding to this need, we conducted a rapid review to determine the magnitude of association between “P<sup>2</sup>ROGRESS And Other Factors” and risk of severe outcomes of COVID-19.

## METHODS

### Review Approach



1  
2  
3 The urgent need for empiric evidence to inform the prioritization of pandemic immunization strategies  
4 in Canada necessitated a rapid but rigorous approach to synthesizing the currently available data.  
5 Therefore, we performed a rapid review informed by traditional systematic review methodology,[12]  
6 with several modifications to allow for the evidence to be synthesized on an expedited timeline (e.g.,  
7 single reviewer for study selection, data extraction, and assessment of risk of bias) and focusing on  
8 studies having high applicability to Canada (e.g., countries with universal health care system)  
9  
10

11  
12 NACI's High Consequence Infectious Disease Vaccine Working Group was consulted to develop and  
13 refine the scope of the review (i.e., priority population(s), risk condition(s)/factor(s), and outcomes of  
14 interest), but was not involved in the conduct of the review. The working group was not involved in  
15 selection of studies nor the synthesis of findings.  
16  
17

18  
19 The review was conducted following an *a-priori* protocol (PROSPERO #CRD42020198001). Because there  
20 is not yet formal guidance on the reporting of rapid reviews, reporting adheres to the Preferred  
21 Reporting Items for Systematic Reviews and Meta-Analyses (PRISMA).[13]  
22  
23

#### 24 **Literature Search**

25 A health sciences librarian searched Ovid MEDLINE(R) ALL on 15 June 2020 using concepts related to  
26 COVID-19, P<sup>2</sup>ROGRESS And Other Factors, and severe outcomes (Supplemental File). The search was  
27 limited to studies published in English or French in 2020. Additionally, the search was limited to  
28 populations in countries that are members of the Organisation for Economic Cooperation and  
29 Development (OECD),[14] in an effort to include studies of highest relevance to the Canadian context.  
30 Editorials and letters were excluded. We supplemented the Medline search by hand-searching  
31 Epistemonikos COVID-19 in L-OVE Platform (<https://app.iloveevidence.com/topics>) and McMaster  
32 COVID-19 Evidence Alerts (<https://plus.mcmaster.ca/COVID-19/>) for relevant prognosis or aetiology  
33 studies up to 12 June 2020. A hand-search of relevant websites recommended by the NACI working  
34 group was also undertaken, as well as continual surveillance for publication of eligible pre-prints located  
35 by the search. Searches were exported to an Endnote Library (X9, Clarivate Analytics, Philadelphia, PA)  
36 and duplicates removed.  
37  
38  
39  
40

#### 41 **Eligibility Criteria**

42 We included studies published in English or French since 1 January 2020 that reported on the magnitude  
43 of association between potential P<sup>2</sup>ROGRESS And Other Factors and severe outcomes of COVID-19  
44 (Supplement File). Eligible populations, in order of priority, were people (a) from a general/community  
45 sample, (b) with COVID-19 confirmed (by laboratory testing or epidemiologic linkage), (c) hospitalized  
46 with COVID-19, and d) with a risk factor of interest. To ensure relevance to the Canadian context, studies  
47 had to be conducted in OECD countries;[14] we included studies from countries that do not provide  
48 universal (or near universal) coverage for core medical services (i.e., Chile, Greece, Mexico, Poland, the  
49 Slovak Republic, and the United States)[15] but considered these to be less applicable to the Canadian  
50 context when interpreting the findings.  
51  
52  
53  
54  
55  
56  
57  
58  
59  
60

1  
2  
3 The exposures of interest were any P<sup>2</sup>ROGRESS And Other Factors believed to be associated with  
4 differential health outcomes across population groups (i.e., pre-existing conditions, place or state of  
5 residence, race/ethnicity/culture/language, immigration, refugee status, occupation, gender identity or  
6 sex, religion or belief system, education or literacy level, socioeconomic status, social capital, age, and  
7 other factors).[16, 17] Eligible comparators were population groups that did not have the P<sup>2</sup>ROGRESS  
8 And Other Factor, or experienced a P<sup>2</sup>ROGRESS And Other Factor to a different degree (e.g., older vs.  
9 younger). Factors could be present among a population with or without COVID-19. The infection must  
10 have been confirmed by laboratory testing or linked epidemiologically (e.g., household contact). Studies  
11 including populations with other pandemic-related infections (e.g., Severe Acute Respiratory Syndrome,  
12 Middle East Respiratory Syndrome) were excluded if data specific to COVID-19 cases could not be  
13 isolated. We also excluded studies of interventions and where the entire study population had severe  
14 disease (e.g., ICU settings).  
15  
16  
17  
18  
19

20 Any length of follow-up for outcomes of interest was acceptable. Eligible studies reported on at least  
21 one primary outcome (i.e., rate of hospitalization, hospital length of stay, severe disease [as defined by  
22 study authors; for example, composite outcome of ICU transfer or death], ICU admission and length of  
23 stay, need for mechanical ventilation [MV], and mortality [case fatality or all-cause]). In order to  
24 prioritize the most rigorous and applicable evidence, we included only prospective and retrospective  
25 cohort studies that employed a multivariate analysis and provided results of the independent  
26 contribution of P<sup>2</sup>ROGRESS And Other Factors to severe outcomes, while accounting for potential  
27 confounders (minimally age and sex). Pre-prints were included only if they were accepted by a peer-  
28 reviewed journal; pre-prints that were later published (between the date of the search and manuscript  
29 submission) were included. Government reports from hand-searched websites were eligible.  
30  
31  
32  
33

### 34 **Study Selection**

35 All records retrieved by the searches were exported to a Microsoft Office Excel (Microsoft Corporation,  
36 Redmond, WA) spreadsheet for screening. After piloting the eligibility criteria on a sample of 70 records,  
37 one reviewer independently screened records for inclusion by title/abstract, and those deemed to be  
38 potentially relevant were assessed by full text. Uncertainties about the inclusion of any full text study  
39 were resolved through consultation with a second reviewer.  
40  
41  
42

### 43 **Data Extraction**

44 Following a pilot round, one reviewer independently extracted data from each included study into an  
45 Excel workbook. We extracted data on (a) population size and demographics, (b) setting, (c) dates of  
46 data collection, (d) COVID-19 ascertainment method, (e) co-infections, (f) outcomes reported with  
47 definitions for composite outcomes (e.g., severe disease), (f) number of participants analysed, (h)  
48 relevant outcome data related to P<sup>2</sup>ROGRESS factors of interest. For both continuous and dichotomous  
49 outcomes, we extracted adjusted relative effect sizes (i.e., odds ratio [OR], risk ratio [RR], hazard ratio  
50 [HR]) and measures of variability (95% confidence interval [CI]). A second reviewer was consulted in the  
51 event of uncertainty about any of the extracted data. Given the expedited approach, we extracted only  
52 data that were reported within the included studies and made no attempt to contact authors for missing  
53 or unclear data.  
54  
55  
56  
57  
58  
59  
60

### Quality Assessments

To expedite quality assessments, we did not use a formal tool; instead we focused on key variables that were considered to be most relevant to the topic, and that would allow for meaningful stratification of studies by quality. The key variables that we used to assess the quality of the included studies were (a) the extent of adjustment for relevant covariates (i.e., basic adjustment for age and sex, versus more extensive adjustment for numerous potential confounders including comorbidities), (b) follow-up duration and extent of censorship for some outcomes (e.g.,  $\geq 2$  weeks for mortality), and (c) inappropriate or large exclusions from the study and/or analysis (e.g., missing data on risk factor status or analytical variables). Following assessment of these key variables by a single reviewer, studies without concerns for all three criteria were rated good while others were rated fair. A second reviewer was consulted in the case of uncertainty about the assessment of any individual study.

### Synthesis

Given substantial clinical (e.g., risk factors and/or comparators examined, outcome definitions) and methodological (varying covariates included in the adjusted analyses, different measures of association) heterogeneity, it was not appropriate to pool the studies statistically. Instead, we present a narrative summary of the results across studies for each risk factor. When making conclusions about the association between a P<sup>2</sup>ROGRESS And Other Factor and an outcome, we focused primarily on the magnitude of effect rather than statistical significance, which is heavily dependent on sample size. We categorized associations to be small/unimportant (odds ratio [OR] or risk ratio [RR]  $\leq 1.70$ ), moderate (1.71 to 1.99), large ( $\geq 2.00$ ), or very large ( $\geq 5.00$ ).<sup>[18]</sup> When determining the magnitude, we compared findings across all relevant studies and often relied heavily on the findings of the largest and/or good quality studies.

### Certainty of Evidence

The expedited approach to evidence synthesis did not allow for a formal appraisal of the certainty of evidence across studies for each P<sup>2</sup>ROGRESS And Other Factor-Outcome association. Instead, a single reviewer assessed the certainty of the evidence for each association considering relevant components of the Grading of Recommendations Assessment, Development and Evaluation (GRADE) approach:<sup>[19, 20]</sup> (a) directness in terms of country (presence of universal healthcare) and source population (community sample vs. hospitalized patients), (b) sample size ( $n < 500$  considered small) and magnitude of association, (c) study quality, and (d) consistency of associations (in direction and magnitude) across studies. Bodies of evidence started at high certainty<sup>[21]</sup> and were rated down for weaknesses in any of the aforementioned characteristics. The level of certainty in associations are referred to using the terms 'uncertain' (no or very low certainty), 'may' (low or some certainty), and 'probably' (moderate certainty).<sup>[22]</sup> At least two other reviewers confirmed the certainty of evidence appraisals, with disagreements resolved by discussion.

### Patient and Public Involvement

This research was conducted without patient and public involvement.

## RESULTS

### Characteristics of Studies

Of 3,740 unique records identified by the searches, 949 were screened at full text, and 34 studies that reported on 32 unique populations were included in the review (Figure 1; Supplemental File shows studies excluded by full text, with reasons).[23-56] Three studies conducted in the United Kingdom (UK)[39, 44, 47] used overlapping cohorts from a single medical/research database, and were considered as a single population in the analysis. Another large UK study[56] is likely to also be overlapping with these populations, but the degree of overlap is not known.

Table 1 shows the characteristics of the included studies (full details about individual studies in Supplemental File). Briefly, all of the included studies were prospective or retrospective cohorts. The studies were published between 23 April and 6 July 2020, and half (17/34, 50%) reported on populations in the United States.[23, 24, 31, 32, 36-38, 40-43, 45, 46, 49, 51, 53, 54] The remaining countries represented (Italy,[25, 27-30, 35, 50, 55] Spain,[26] UK[33, 39, 44, 47, 48, 52, 56]) all have universal or universal-like healthcare (one study used data from 17 countries). All studies reported on adults, and the overall median was 596 participants (range 44 to 418,794). The mean or median age of the populations studied ranged from 42 to 84 years (32/34 [94%] 54 to 71 years). Most studies (16/34, 47%) examined the association between risk factors and outcomes in a hospitalized population. Studies most commonly reported on the independent association of pre-existing conditions (n=27 studies), gender identity or sex (n=18), and race or ethnicity (n=12) with severe outcomes (most commonly hospitalization, n=9). P<sup>2</sup>ROGRESS And Other Factors not examined in the included studies were immigration or refugee status, religion or belief system, social capital, and substance use disorders. There were also no data specific to pregnant women, indigenous populations, people with disabilities, nor different ages in children.

**Table 1. Included studies overview (n=34)**

| Study design & country<br>(no. of studies)                                                                                                                                                                                                                                                                                              | P <sup>2</sup> ROGRESS risk factors<br>(no. of studies*)                                                                                                                                                                                                                                                                                                                                                                                                                                                                                                                                                                                                                                                                                                                                                                                                                                                                                                                                                                                                                                                                                                                                                                                                                                                                                                                                                                                                                                                                                                                                                                                                                | COVID-19<br>(no. of studies)                                                                                                                                                                                               | Primary outcomes<br>(no. of studies*)                                                                                                                                                                                                                                                                                                                                                                                                                                                   | Risk of bias<br>(no. of studies) |
|-----------------------------------------------------------------------------------------------------------------------------------------------------------------------------------------------------------------------------------------------------------------------------------------------------------------------------------------|-------------------------------------------------------------------------------------------------------------------------------------------------------------------------------------------------------------------------------------------------------------------------------------------------------------------------------------------------------------------------------------------------------------------------------------------------------------------------------------------------------------------------------------------------------------------------------------------------------------------------------------------------------------------------------------------------------------------------------------------------------------------------------------------------------------------------------------------------------------------------------------------------------------------------------------------------------------------------------------------------------------------------------------------------------------------------------------------------------------------------------------------------------------------------------------------------------------------------------------------------------------------------------------------------------------------------------------------------------------------------------------------------------------------------------------------------------------------------------------------------------------------------------------------------------------------------------------------------------------------------------------------------------------------------|----------------------------------------------------------------------------------------------------------------------------------------------------------------------------------------------------------------------------|-----------------------------------------------------------------------------------------------------------------------------------------------------------------------------------------------------------------------------------------------------------------------------------------------------------------------------------------------------------------------------------------------------------------------------------------------------------------------------------------|----------------------------------|
| Study design:<br><ul style="list-style-type: none"> <li>• Retrospective cohort (25)</li> <li>• Prospective cohort (9)</li> </ul> Country:<br><ul style="list-style-type: none"> <li>• USA (17)</li> <li>• Italy (8)</li> <li>• UK (7 studies in 5 populations)</li> <li>• Spain (1)</li> <li>• Multi-country<sup>§</sup> (1)</li> </ul> | <ul style="list-style-type: none"> <li>❖ Pre-existing disease/disability:                             <ul style="list-style-type: none"> <li>○ Any comorbidity or number of comorbidities (4)</li> <li>○ Underweight, overweight or obesity (12 studies of 10 populations)</li> <li>○ Cardiovascular (chronic cardiac disease/heart disease, congestive heart failure, coronary artery disease, hyperlipidemia, hypertension) (10 studies of 9 populations)</li> <li>○ Endocrinologic (diabetes, hyperglycemia) (8)</li> <li>○ Respiratory (asthma, COPD, chronic bronchitis, lung disease, previous pneumonia) (8 studies of 7 populations)</li> <li>○ Renal (chronic kidney disease) (5)</li> <li>○ Malignancy (cancer) (5)</li> <li>○ Neurological (Alzheimer's, dementia, chronic neurological disorder) (4)</li> <li>○ Hepatic (liver disease, with or without cirrhosis) (3)</li> <li>○ Immunocompromised (rheumatic disease, HIV/AIDS) (2)</li> <li>○ Mental health (2)</li> <li>○ Gastrointestinal (irritable bowel disease) (1)</li> </ul> </li> <li>❖ Place of residence (4)</li> <li>❖ Race or ethnicity (11 studies of 10 populations)</li> <li>❖ Occupation (1)</li> <li>❖ Gender identity or sex (18 studies of 17 populations)</li> <li>❖ Education (1)</li> <li>❖ Socioeconomic status (5 studies of 4 populations)</li> <li>❖ Age (17 studies of 16 populations)</li> <li>❖ Other factors:                             <ul style="list-style-type: none"> <li>○ Smoking status (7 studies of 5 populations)</li> <li>○ Alcohol consumption (3 studies of 1 population)</li> <li>○ Physical activity (2 studies of 1 population)</li> </ul> </li> </ul> | Diagnosis:<br><ul style="list-style-type: none"> <li>• RT-PCR/PCR (25)</li> <li>• Lab-confirmed (5)</li> <li>• ICD codes (1)</li> <li>• Lab-confirmed or ICD codes (2)</li> <li>• Lab-confirmed or symptoms (1)</li> </ul> | <ul style="list-style-type: none"> <li>• Rate of hospitalization (9)</li> <li>• Hospitalization/self-isolation (composite) (1)</li> <li>• Hospital length of stay (0)</li> <li>• Severe disease (4)</li> <li>• ICU admission (3)</li> <li>• ICU length of stay (0)</li> <li>• ICU or MV (1)</li> <li>• Non-invasive ventilation or MV (1)</li> <li>• MV (4)</li> <li>• ICU or mortality (composite) (3)</li> <li>• MV or mortality (composite) (1)</li> <li>• Mortality (19)</li> </ul> | Good (19)<br>Fair (15)           |

\* a study may contribute to more than one risk group, or outcome

<sup>§</sup> study of healthcare workers includes data from Australia, Canada, Chile, China, Germany, India, Ireland, Italy, Netherlands, New Zealand, Pakistan, Poland, Singapore, South Africa, Sweden, UK, and USA

1  
2  
3 BMI: body mass index; COVID-19: novel coronavirus; HIV/AIDS: human immunodeficiency virus/acquired immunodeficiency syndrome; ICD: International Classification of Diseases;  
4 ICU: intensive care unit; MV: mechanical ventilation; No: number; NR: not reported; RT-PCR; reverse transcription polymerase chain reaction; UK: United Kingdom; USA: United  
5 States of America  
6  
7  
8  
9  
10  
11  
12  
13  
14  
15  
16  
17  
18  
19  
20  
21  
22  
23  
24  
25  
26  
27  
28  
29  
30  
31  
32  
33  
34  
35  
36  
37  
38  
39  
40  
41  
42  
43  
44  
45  
46  
47

For peer review only

**Study Quality**

The majority of studies (19/34, 56%) were rated as good quality[23, 24, 29, 31, 33-36, 40, 42, 45, 46, 48-53, 55] because they adjusted for age, sex, and pre-existing disease in their analysis, had adequate follow-up of outcomes, and few or no missing data. The remaining studies had flaws in one or more of the three domains that we considered to be most important for this review.

**Association Between Risk Factors and Outcomes**

Table 2 shows a summary of findings for associations between each reported risk factor and outcomes of interest; all contributing data are shown in the Supplemental File.

For peer review only

**Table 2.** Summary of evidence for associations between risk factors and severe outcomes of COVID-19

| Risk factor<br>(at-risk vs. reference population) <sup>a</sup>            | Population <sup>b</sup>                   | Magnitude of association (confidence in association) <sup>c</sup> , by outcome |               |                        |                 |                 |
|---------------------------------------------------------------------------|-------------------------------------------|--------------------------------------------------------------------------------|---------------|------------------------|-----------------|-----------------|
|                                                                           |                                           | Hospitalization                                                                | ICU admission | Mechanical ventilation | Severe disease  | Mortality       |
| <b>Pre-existing conditions</b>                                            |                                           |                                                                                |               |                        |                 |                 |
| <b>Body mass index(kg/m<sup>2</sup>)<sup>d</sup></b>                      |                                           |                                                                                |               |                        |                 |                 |
| Underweight (<18.5) vs. normal (18.5-24.9)                                | Hospitalized                              |                                                                                | -<br>(low)    | -<br>(low)             |                 | -<br>(low)      |
| Overweight (25.0-29.9) vs. normal                                         | Community sample or positive for COVID-19 | -<br>(low)                                                                     | uncertain     | uncertain              | -<br>(low)      | -<br>(low)      |
| Obesity class I and II (≥30.0) vs. normal                                 | Community sample or positive for COVID-19 | +<br>(low)                                                                     | +<br>(low)    | +<br>(low)             | -<br>(low)      | -<br>(moderate) |
| Obesity class III (≥40.0) vs. normal                                      | Positive for COVID-19                     | ++<br>(low)                                                                    |               | uncertain              | +<br>(low)      | - to +<br>(low) |
| <b>Respiratory conditions</b>                                             |                                           |                                                                                |               |                        |                 |                 |
| Chronic, varied (e.g., asthma, COPD)                                      | Community sample or positive for COVID-19 | -<br>(moderate)                                                                | uncertain     | uncertain              | -<br>(moderate) | -<br>(moderate) |
| Prior pneumonia                                                           | Community sample                          | -<br>(low)                                                                     |               |                        |                 |                 |
| <b>Cardiovascular disease</b>                                             |                                           |                                                                                |               |                        |                 |                 |
| Heart failure                                                             | Community sample                          | -<br>(low)                                                                     |               |                        |                 |                 |
|                                                                           | Positive for COVID-19                     | ++<br>(low)                                                                    |               |                        | +<br>(low)      | -<br>(low)      |
| Coronary artery disease, hypertension, hyperlipidemia, composite outcomes | Community sample or positive for COVID-19 | -<br>(moderate)                                                                | uncertain     | uncertain              | -<br>(low)      | -<br>(low)      |
| <b>Diabetes</b>                                                           | Community sample                          | -<br>(low)                                                                     |               |                        |                 |                 |
|                                                                           | Positive for COVID-19                     | ++<br>(low)                                                                    | uncertain     | -<br>(low)             | -<br>(low)      | -<br>(moderate) |
| <b>Liver disease</b>                                                      | Positive for COVID-19                     | -<br>(low)                                                                     |               |                        |                 | ++<br>(low)     |
|                                                                           | Hospitalized                              |                                                                                |               |                        |                 | -<br>(low)      |
| <b>Chronic kidney disease</b>                                             | Community sample or positive for COVID-19 | ++<br>(moderate)                                                               |               |                        | -<br>(moderate) | -<br>(moderate) |
| <b>Inflammatory bowel disease</b>                                         | Positive for COVID-19                     | -<br>(low)                                                                     |               |                        | -<br>(low)      |                 |
| <b>Dementia/chronic neurologic disorders</b>                              |                                           |                                                                                |               |                        |                 |                 |



| Risk factor<br>(at-risk vs. reference population) <sup>a</sup>                                                                                                                                                                                                  | Population <sup>b</sup>                   | Magnitude of association (confidence in association) <sup>c</sup> , by outcome |               |                        |                 |                                                |
|-----------------------------------------------------------------------------------------------------------------------------------------------------------------------------------------------------------------------------------------------------------------|-------------------------------------------|--------------------------------------------------------------------------------|---------------|------------------------|-----------------|------------------------------------------------|
|                                                                                                                                                                                                                                                                 |                                           | Hospitalization                                                                | ICU admission | Mechanical ventilation | Severe disease  | Mortality                                      |
| <i>Magnitude of associations are shown as: uncertain (no/very low confidence), no important association (-; OR or RR ≤1.70), moderate association (+; 1.71-1.99), large/important association (++; ≥2.00), or very large important association (+++; ≥5.00)</i> |                                           |                                                                                |               |                        |                 |                                                |
| Alzheimer's disease or dementia                                                                                                                                                                                                                                 | Community sample                          | ++<br>(low)                                                                    |               |                        |                 | -<br>(low)                                     |
| Chronic neurologic disorders                                                                                                                                                                                                                                    | Hospitalized                              |                                                                                |               |                        |                 | -<br>(low)                                     |
| <b>Cancer</b>                                                                                                                                                                                                                                                   |                                           |                                                                                |               |                        |                 |                                                |
| Any cancer                                                                                                                                                                                                                                                      | Positive for COVID-19                     | -<br>(moderate)                                                                |               |                        | -<br>(moderate) | -<br>(moderate)                                |
| Hematological malignancy                                                                                                                                                                                                                                        | Positive for COVID-19                     |                                                                                |               |                        |                 | +<br>(low)                                     |
| <b>Immunocompromised</b>                                                                                                                                                                                                                                        |                                           |                                                                                |               |                        |                 |                                                |
| Rheumatic disease                                                                                                                                                                                                                                               | Positive for COVID-19                     | uncertain                                                                      | uncertain     |                        |                 | uncertain                                      |
| Human immunodeficiency virus                                                                                                                                                                                                                                    | Hospitalized                              |                                                                                |               |                        |                 | uncertain                                      |
| <b>Mental health</b>                                                                                                                                                                                                                                            |                                           |                                                                                |               |                        |                 |                                                |
| Depression                                                                                                                                                                                                                                                      | Positive for COVID-19                     | -<br>(low)                                                                     |               |                        |                 |                                                |
| Ever visited a psychiatrist                                                                                                                                                                                                                                     | Community sample                          | -<br>(low)                                                                     |               |                        |                 |                                                |
| <b>Other factors</b>                                                                                                                                                                                                                                            |                                           |                                                                                |               |                        |                 |                                                |
| <b>Age<sup>d</sup></b>                                                                                                                                                                                                                                          |                                           |                                                                                |               |                        |                 |                                                |
| 45-54 vs. ≤45 years old                                                                                                                                                                                                                                         | Positive for COVID-19                     | ++<br>(moderate)                                                               |               |                        | -<br>(low)      | ++<br>(low)                                    |
| 50-64 vs. ≤45 years old                                                                                                                                                                                                                                         | Positive for COVID-19                     | ++<br>(moderate)                                                               |               |                        | -<br>(low)      | ++<br>(moderate)                               |
| >60 vs. ≤45 years old                                                                                                                                                                                                                                           | Positive for COVID-19                     | ++/+++<br>(moderate/low)                                                       |               | ++<br>(low)            | +<br>(low)      | ++/+++<br>(moderate/low)                       |
| >70 or 75 vs. ≤45 years old                                                                                                                                                                                                                                     | Positive for COVID-19                     | +++<br>(moderate)                                                              |               |                        | ++<br>(low)     | +++<br>(moderate)                              |
| >80 vs. ≤45 years old                                                                                                                                                                                                                                           | Positive for COVID-19                     | +++<br>(low)                                                                   |               |                        |                 | +++<br>(low)                                   |
| 70-79 vs. 65-69 years old                                                                                                                                                                                                                                       | Hospitalized                              |                                                                                |               |                        |                 | -<br>(moderate)                                |
| >80 vs. 65-69 years old                                                                                                                                                                                                                                         | Hospitalized                              |                                                                                |               |                        |                 | ++<br>(low)                                    |
| Increased age (continuous/incremental) <sup>e</sup>                                                                                                                                                                                                             | Community sample or positive for COVID-19 | Approximately 2-6% relative increase per year<br>(moderate)                    | -<br>(low)    | -<br>(low)             | -<br>(low)      | Approximately 5-10% relative increase per year |

| Risk factor<br>(at-risk vs. reference population) <sup>a</sup> | Population <sup>b</sup>                   | Magnitude of association (confidence in association) <sup>c</sup> , by outcome                                                                                                                                                                                  |                 |                        |                 |                 |
|----------------------------------------------------------------|-------------------------------------------|-----------------------------------------------------------------------------------------------------------------------------------------------------------------------------------------------------------------------------------------------------------------|-----------------|------------------------|-----------------|-----------------|
|                                                                |                                           | Hospitalization                                                                                                                                                                                                                                                 | ICU admission   | Mechanical ventilation | Severe disease  | Mortality       |
|                                                                |                                           | <i>Magnitude of associations are shown as: uncertain (no/very low confidence), no important association (-; OR or RR ≤1.70), moderate association (+; 1.71-1.99), large/important association (++; ≥2.00), or very large important association (+++; ≥5.00)</i> |                 |                        |                 |                 |
|                                                                |                                           |                                                                                                                                                                                                                                                                 |                 |                        |                 | (moderate)      |
| <b>Gender or sex</b>                                           |                                           |                                                                                                                                                                                                                                                                 |                 |                        |                 |                 |
| Male vs. female (all ages, mean 54 to 73)                      | Community sample                          | -<br>(low)                                                                                                                                                                                                                                                      |                 |                        |                 |                 |
|                                                                | Positive for COVID-19                     | ++<br>(moderate)                                                                                                                                                                                                                                                | uncertain       | +<br>(low)             | -<br>(low)      | -<br>(moderate) |
| Male vs. female (20-64 years) <sup>f</sup>                     | Hospitalized                              |                                                                                                                                                                                                                                                                 |                 |                        |                 | ++<br>(low)     |
| <b>Race/ethnicity</b>                                          |                                           |                                                                                                                                                                                                                                                                 |                 |                        |                 |                 |
| Black vs. non-Hispanic white                                   | Community sample or positive for COVID-19 | ++<br>(low)                                                                                                                                                                                                                                                     | -<br>(moderate) | -<br>(moderate)        | -<br>(moderate) | -<br>(moderate) |
| Hispanic vs. non-Hispanic white                                | Positive for COVID-19                     | -<br>(low)                                                                                                                                                                                                                                                      | uncertain       | -<br>(low)             | -<br>(low)      |                 |
| Asian vs. white                                                | Community sample or positive for COVID-19 | -<br>(moderate)                                                                                                                                                                                                                                                 | -<br>(low)      | -<br>(low)             | -<br>(low)      | -<br>(moderate) |
| Asian (Bangladeshi) vs. British white                          | Hospitalized                              |                                                                                                                                                                                                                                                                 |                 |                        |                 | ++<br>(low)     |
| <b>Culture/language/immigrant/refugee status</b>               |                                           |                                                                                                                                                                                                                                                                 |                 |                        |                 |                 |
| <b>Place of residence/household size</b>                       |                                           |                                                                                                                                                                                                                                                                 |                 |                        |                 |                 |
| Living in a low income area                                    | Positive for COVID-19                     | -<br>(low)                                                                                                                                                                                                                                                      |                 |                        |                 |                 |
| Homeless vs. has a home                                        | Positive for COVID-19                     | ++<br>(low)                                                                                                                                                                                                                                                     |                 |                        |                 |                 |
| Suburban vs. urban hospital                                    | Hospitalized                              |                                                                                                                                                                                                                                                                 |                 | uncertain              |                 |                 |
| 1, 3, or 4 vs. 2 household members                             | Community sample                          | -<br>(low)                                                                                                                                                                                                                                                      |                 |                        |                 |                 |
| <b>Occupation</b>                                              |                                           |                                                                                                                                                                                                                                                                 |                 |                        |                 |                 |
| Laryngologist or intubator vs. assistant                       | Healthcare workers for COVID-19 patients  | -<br>(low)                                                                                                                                                                                                                                                      |                 |                        |                 |                 |
| <b>Education level</b>                                         |                                           |                                                                                                                                                                                                                                                                 |                 |                        |                 |                 |
| Lower education vs. university degree                          | Community sample                          | -<br>(low)                                                                                                                                                                                                                                                      |                 |                        |                 |                 |
| <b>Socioeconomic status</b>                                    |                                           |                                                                                                                                                                                                                                                                 |                 |                        |                 |                 |

| Risk factor (at-risk vs. reference population) <sup>a</sup>                   | Population <sup>b</sup>                   | Magnitude of association (confidence in association) <sup>c</sup> , by outcome |               |                        |                |                 |
|-------------------------------------------------------------------------------|-------------------------------------------|--------------------------------------------------------------------------------|---------------|------------------------|----------------|-----------------|
|                                                                               |                                           | Hospitalization                                                                | ICU admission | Mechanical ventilation | Severe disease | Mortality       |
| Highest vs. lowest quintile of social deprivation                             | Community sample                          | +<br>(low)                                                                     |               |                        |                | -<br>(moderate) |
| Income ≤25 <sup>th</sup> vs. >50 <sup>th</sup> or 75 <sup>th</sup> percentile | Positive for COVID-19                     | ++<br>(low)                                                                    |               |                        |                |                 |
| ≥Average vs. below average income                                             | Community sample                          | -<br>(low)                                                                     |               |                        |                |                 |
| <b>Smoking</b>                                                                |                                           |                                                                                |               |                        |                |                 |
| Current or former vs. never                                                   | Community sample or positive for COVID-19 | -<br>(moderate)                                                                |               | uncertain              | -<br>(low)     | -<br>(low)      |
| <b>Alcohol consumption</b>                                                    |                                           |                                                                                |               |                        |                |                 |
| Above vs. within guidelines                                                   | Community sample or positive for COVID-19 | -<br>(low)                                                                     |               |                        |                |                 |
| <b>Physical activity level</b>                                                |                                           |                                                                                |               |                        |                |                 |
| Below vs. within guidelines                                                   | Community sample or positive for COVID-19 | -<br>(low)                                                                     |               |                        |                |                 |

COPD: chronic obstructive pulmonary disease; ICU: intensive care unit; OR: odds ratio; RR: risk ratio

<sup>a</sup> When not listed, the reference group are those without the risk factor.

<sup>b</sup> Outcomes of severe disease (as defined by authors), ICU admission, mechanical ventilation, and mortality are all in a hospitalized population, except for Liver Disease, where findings differed depending on the population denominator used.

<sup>c</sup> A formal assessment of the quality/confidence of the evidence was not performed but was informed by the Grading of Recommendations, Assessment, Development and Evaluations (GRADE) approach. We determined our confidence in the magnitude of the associations by considering primarily study limitations (risk of bias), consistency in findings across studies, and precision (sample size). Very low confidence indicates that we have no/very low confidence about possible associations; low means that the evidence indicates that there **may** be an association; moderate means that the evidence indicates that there **probably** is an association. High certainty evidence as not found for any association.

<sup>d</sup> For categorical data for age, and BMI, the reference group differed slightly across studies.

<sup>e</sup> For continuous or incremental data for age, the rate of hospitalization and mortality outcomes, approximately half of the studies analyzed data on a continuum (with the remainder reporting in incremental categories, e.g., 5-year units)

<sup>f</sup> Subgroup data from one study that analyzed the younger population separately

1  
2  
3 There was low or moderate certainty of evidence for important/large associations with increased risk of  
4 hospitalization in people having confirmed COVID-19, for the following risk factors: obesity class III (body  
5 mass index  $\geq 40$  kg/m<sup>2</sup>; 1 study, n=5,297),[49] heart failure (2 studies, n=6,331),[23, 49] diabetes (2  
6 studies, n=6,331),[23, 49] chronic kidney disease (confirmed COVID-19 or community sample; 2 studies,  
7 n=424,073),[47, 49] dementia (1 study, n=418,794),[47] age over 45 years (vs. 45 or younger; 2 studies,  
8 n=6,331),[23, 49] male gender (3 studies, n=3,812),[23, 49, 51] black race/ethnicity (vs. non-Hispanic  
9 white; confirmed COVID-19 and community samples, 5 studies in 4 populations, n=428,606),[23, 44, 47,  
10 49, 51] homelessness (1 study, n=1,052),[23] and low income (<25<sup>th</sup> vs. >50<sup>th</sup> percentile; 1 study,  
11 n=1,052).[23] Age over 60 and over 70 years may be associated with important increases in the rate of  
12 mechanical ventilation (1 study, n=486)[40] and severe disease (1 study, n=2,725),[49] respectively.  
13  
14  
15  
16

17 For mortality, important associations with increased risk may exist for liver disease (2 studies,  
18 n=20,597),[33, 53] Bangladeshi ethnicity (vs. British white; 1 study, n=130,091),[56] and age over 45  
19 years (vs. <45 years; 3 studies, n=87,819).[33, 49, 56] The data were somewhat inconsistent for gender,  
20 with most studies showing moderate certainty of no important effect, but one large fair quality study  
21 (n=130,091)[56] from the UK that stratified its analysis by age showed that hospitalized males aged 20-  
22 64 years (but not older) may be at about two-fold increased risk of mortality compared to females.  
23 Associations with hospitalization and mortality may be very large for those aged over 60 years (2  
24 studies, n=6,331 for hospitalization;[23, 49] 3 studies, n=24,163 for mortality[33, 41, 49]) and are  
25 probably very large for those over 70 years (2 studies, n=6,331 for hospitalization;[23, 49] 2 studies,  
26 n=22,858 for mortality[33, 49]). One study (n=63,094)[56] directly compared subgroups of older adults,  
27 showing that compared to those aged 65-69 years, there may be no important increased risk of  
28 mortality among hospitalized adults aged 70-79 years, but risk may increase about 2-fold for those 80  
29 years and older. Studies treating age on a continuum or across small increments consistently found that  
30 risks for hospitalization and mortality increased with increasing age (e.g., approximately 2-6% and 5-10%  
31 relative increase in risk per year) (3 studies in 2 populations, n=422,275 for hospitalization;[44, 47, 51]  
32 11 studies, n=6,877 for mortality).[25-27, 31, 35, 38, 45, 46, 48, 51, 55]  
33  
34  
35  
36  
37  
38

39 Moderate associations may exist for increased risk of mechanical ventilation (4 studies, n=1,559)[38, 40,  
40 42, 46] and ICU admission (2 studies, n=873),[38, 42] and severe disease (1 study, n=2,725)[49] with  
41 obesity (body mass index  $\geq 30$  or 40 kg/m<sup>2</sup>); severe disease with heart failure (1 study, n=2,725);[49]  
42 mortality with haematological malignancy (1 study, n=1,183);[52] mechanical ventilation with male  
43 gender (4 studies, n=881);[27, 40, 42, 46] and hospitalization with social deprivation (highest vs. lowest  
44 quintile; 1 study, n=340,996).[44]  
45  
46  
47

48 There was moderate certainty evidence for no important increase in risk of hospitalization with chronic  
49 respiratory conditions (4 studies in 3 populations, n=425,125),[23, 44, 47, 49] cardiovascular disease  
50 apart from heart failure (i.e., coronary artery disease, hypertension, hyperlipidaemia; 4 studies in 3  
51 populations, n=425,125),[23, 44, 47, 49] non-specific cancer (2 studies, n=6,331),[23, 49] Asian  
52 race/ethnicity other than Bangladeshi (vs. non-Hispanic white; 3 studies in 2 populations,  
53 n=424,073),[44, 47, 49] and current or former smoking (5 studies in 3 populations, n=425,125).[23, 39,  
54 44, 47, 49] Additionally, there was moderate certainty evidence for no important increase in severe  
55  
56  
57  
58  
59  
60

1  
2  
3 disease with chronic respiratory conditions (1 study, n=2,725),[49] chronic kidney disease (2 studies,  
4 n=2,922),[24, 49] nonspecific cancer (2 studies, n=2,769),[29, 49] and Black race/ethnicity (vs. non-  
5 Hispanic white; 2 studies, n=3,030);[36, 49] and no important increase in risk of mortality with obesity  
6 (body mass index  $\geq 30$  kg/m<sup>2</sup>; 6 studies, n=8,716),[35, 38, 43, 46, 49, 51] chronic respiratory conditions (4  
7 studies, n=23,315),[31, 33, 46, 49] diabetes (4 studies, n=23,315), [31, 33, 46, 49] chronic kidney disease  
8 (3 studies, n=23,058), nonspecific cancer (3 studies, n=24,041),[33, 49, 52] male gender (9 studies,  
9 n=27,875),[25-27, 31, 33, 35, 46, 49, 51] Black (5 studies, n=135,418)[38, 48, 49, 51, 56] or Asian  
10 race/ethnicity (vs. non-Hispanic white; 3 studies, n=4,015),[38, 48, 49] and social deprivation (lowest vs.  
11 highest quintile; 1 study, n=130,091).[56] Overall, there were few data for the ICU and mechanical  
12 ventilation outcomes.  
13  
14  
15

## 16 17 **DISCUSSION**

18 Responding to an urgent need for empiric evidence to inform decision-making on Canada's  
19 immunization strategies,[7] in this rapid review we synthesized studies employing a multivariate analysis  
20 to ascertain potential independent associations between "P<sup>2</sup>ROGRESS And Other Factors" and severe  
21 outcomes of COVID-19. Among 22 potential risk factors examined across the included studies, the most  
22 important risk factors (i.e., those associated with large/important increased risk; OR or RR  $\geq 2.0$ ) for  
23 hospitalization among those with confirmed COVID-19 were several pre-existing chronic health  
24 conditions (obesity class III, heart failure, diabetes, chronic kidney disease [community sample or with  
25 COVID-19], dementia [community sample]), older age (>45 years vs. younger), male gender, Black  
26 race/ethnicity (community sample or with COVID-19), homelessness, and low income ( $\leq 25^{\text{th}}$  vs.  $>50^{\text{th}}$   
27 percentile). Liver disease may be associated with a large increased risk of mortality among people with  
28 COVID-19 and advancing age (>45 years vs. younger) and Bangladeshi ethnicity (vs. British white) are  
29 likely to be associated with a large increased risk of mortality among hospitalized patients. There is  
30 evidence to suggest that male gender may increase risk of mortality among younger (20-64 years), but  
31 not older men.  
32  
33  
34  
35  
36  
37

38 Among the factors identified as increasing risk of severe outcomes, age seemed to be the most  
39 influential; adults older than 60 years may have at least 5 times increased odds of hospitalization and  
40 mortality from COVID-19 compared to those aged less than 45 years. This increased risk appears to  
41 magnify at least to some degree even for those older than 60 years, with those aged over 80 years  
42 having double the mortality risk of those aged 65-69 years. Though we focused the review on better  
43 quality studies that minimally controlled for age and sex, the strength of certain associations should be  
44 interpreted cautiously because there are likely to be multiple unmeasured confounders that have not  
45 been accounted for. For example, studies reporting on associations between outcomes and age did not  
46 adjust for nursing home residency, and studies examining race did not account for occupation, which  
47 may be an important confounder influencing susceptibility to the infection.[56] In addition, it is  
48 important to be aware that criteria for COVID-19 testing and hospitalization may differ by place and  
49 time, but it is difficult to predict how this may have impacted the findings. In general, many studies  
50 conducted testing based on symptoms and the evidence is likely most applicable to these populations.  
51 The evidence for mechanical ventilation, ICU admission, and severe disease outcomes was relatively  
52 sparse, and we located no evidence meeting our publication date and inclusion criteria to inform the  
53  
54  
55  
56  
57  
58  
59  
60

1  
2  
3 impact of immigration or refugee status, religion or belief system, social capital, substance abuse  
4 disorders, pregnancy, Indigenous identity, living with a disability, nor differing levels of risk among  
5 children in various age groups.  
6

7  
8 The findings of this rapid review will be used to populate the Equity Matrix of NACI's Ethics, Equity,  
9 Feasibility, and Acceptability Framework,[9] which will be a part of a suite of considerations for  
10 informing the development of NACI recommendations on priority pandemic immunization strategies  
11 when initial COVID-19 vaccine supply is limited. NACI will be using the results of this rapid review and  
12 their current understanding of the epidemiology of COVID-19 in Canada to identify distinct inequities  
13 associated with COVID-19, potential reasons for these inequities, and suggested interventions to reduce  
14 inequities and improve access to vaccine when it becomes available. The Equity Matrix applied to  
15 COVID-19 with evidence to-date can be found elsewhere.[11]  
16  
17  
18

### 19 20 **Strengths and Limitations**

21 The expedited methods used in this review allowed for a rapid but comprehensive synthesis of the  
22 highest quality evidence available on multiple risk factors associated with severe COVID-19 outcomes  
23 that is applicable to OECD countries. Generalizations to other countries should be made with caution, as  
24 high risk groups in these populations may differ. We excluded studies only examining patients with  
25 severe COVID-19 (i.e., in ICU settings), and therefore our findings for mechanical ventilation and  
26 mortality are applicable to people with COVID-19 or in general populations, but not necessarily all those  
27 with severe infection. Most studies of patients in the ICU setting that we located were relatively small  
28 and descriptive in nature, such that many would have been excluded due to lack of adjustment or only  
29 have been able to provide low or very low certainty evidence due to their lack of precision. As described  
30 previously, many available studies do not control for any important confounding variables which limited  
31 the number of studies and risk factors included in this review. Given the rapid emergence of new  
32 evidence on the topic, potential associations (or lack of association) for which only low or very low  
33 certainty of evidence is available should continue to be reviewed as new primary research is published.  
34 There is a need for high quality primary research (accounting for multiple confounders) to better  
35 understand the level of risk that might be associated with immigration or refugee status, religion or  
36 belief system, social capital, substance abuse disorders, pregnancy, indigenous identity, living with a  
37 disability, and differing levels of risk among children in various age groups.  
38  
39  
40  
41  
42  
43  
44  
45  
46  
47  
48  
49  
50  
51  
52  
53  
54  
55  
56  
57  
58  
59  
60

## FIGURES

Figure 1 – PRISMA flow of study selection

## ACKNOWLEDGMENTS

We would like to thank the National Advisory Committee on Immunization (NACI) High Consequence Infectious Disease Vaccine Working Group (Caroline Quach, Shelley Deeks, Yen Bui, Kathleen Dooling, Robyn Harrison, Kyla Hildebrand, Michelle Murti, Jesse Papenburg, Robert Pless, Nathan Stall, and Stephen Vaughan) for their contributions to the project. We also thank Liz Dennett (MLIS) for conducting the Medline search, and Karyn Crawford for assisting with article retrieval.

## ABBREVIATIONS

|                        |                                                                                                                                                                                                                                           |
|------------------------|-------------------------------------------------------------------------------------------------------------------------------------------------------------------------------------------------------------------------------------------|
| COVID-19               | Novel coronavirus disease 2019                                                                                                                                                                                                            |
| ICU                    | Intensive care unit                                                                                                                                                                                                                       |
| NACI                   | National Advisory Committee on Immunization                                                                                                                                                                                               |
| OECD                   | Organisation for Economic Co-operation and Development                                                                                                                                                                                    |
| OR                     | Odds ratio                                                                                                                                                                                                                                |
| P <sup>2</sup> ROGRESS | Pre-existing disease or disability, place of residence, race, ethnicity, culture, language, immigrant/refugee status, occupation, gender, religion/belief system, education, socioeconomic status, social capital, age, and other factors |
| RR                     | Risk ratio                                                                                                                                                                                                                                |

## REFERENCES

1. World Health Organization. Naming the coronavirus disease (COVID-19) and the virus that causes it 2020. [https://www.who.int/emergencies/diseases/novel-coronavirus-2019/technical-guidance/naming-the-coronavirus-disease-\(covid-2019\)-and-the-virus-that-causes-it](https://www.who.int/emergencies/diseases/novel-coronavirus-2019/technical-guidance/naming-the-coronavirus-disease-(covid-2019)-and-the-virus-that-causes-it) (accessed 24 Aug 2020).
2. World Health Organization. Coronavirus Disease 2019 (COVID-19): Situation Report - 51. Geneva, Switzerland: World Health Organization 2020.
3. World Health Organization. Coronavirus disease (COVID-19): Situation report - 210. Geneva, Switzerland: World Health Organization 2020.
4. Rodriguez-Morales AJ, Cardona-Ospina JA, Gutiérrez-Ocampo E, et al. Clinical, laboratory and imaging features of COVID-19: A systematic review and meta-analysis. *Travel Med Infect Dis* 2020;34:101623.
5. Government of Canada. Coronavirus disease 2019 (COVID-19): Epidemiology update. Ottawa, Canada: Government of Canada 2020.
6. World Health Organization. Accelerating a safe and effective COVID-19 vaccine Geneva, Switzerland: World Health Organization 2020. <https://www.who.int/emergencies/diseases/novel-coronavirus-2019/global-research-on-novel-coronavirus-2019-ncov/accelerating-a-safe-and-effective-covid-19-vaccine> (accessed 31 July 2020).
7. Government of Canada. National Advisory Committee on Immunization (NACI): Membership and representation 2020. <https://www.canada.ca/en/public-health/services/immunization/national-advisory-committee-on-immunization-naci/naci-membership-representation.html> (accessed 24 Aug 2020).
8. Government of Canada. Research priorities for COVID-19 vaccines to support public health decisions 2020. <https://www.canada.ca/en/public-health/services/immunization/national-advisory-committee-on-immunization-naci/research-priorities-covid-19-vaccines.html> (accessed 24 Aug 2020).
9. Ismail SJ, Hardy K, Tunis M. A framework for the systematic consideration of ethics, equity, feasibility, and acceptability in vaccine program recommendations. *Vaccine* 2020;38(36):5861-76.
10. Evans T, Brown H. Road traffic crashes: operationalizing equity in the context of health sector reform. *Inj Control Saf Promot* 2003;10(1-2):11-2.
11. Ismail SJ, Tunis MC, Zhao L, et al. Navigating inequities: a roadmap out of the pandemic. Submitted to BMJ. Aug 2020
12. Higgins J, Thomas J, Chandler J, et al. Cochrane Handbook for Systematic Reviews of Interventions. 2nd Edition. Chichester, UK: John Wiley & Sons 2019.
13. Liberati A, Altman DG, Tetzlaff J, et al. The PRISMA statement for reporting systematic reviews and meta-analyses of studies that evaluate healthcare interventions: explanation and elaboration. *BMJ* 2009;339:b2700.



- 1  
2  
3  
4 14. Organisation for Economic Cooperation and Development. Member countries 2020.  
5 <https://www.oecd.org/about/members-and-partners/> (accessed 24 Aug 2020).  
6
- 7  
8 15. Fraser Institute. Comparing Performance of Universal Health Care Countries, 2019.  
9 [https://www.fraserinstitute.org/studies/comparing-performance-of-universal-health-care-countries-](https://www.fraserinstitute.org/studies/comparing-performance-of-universal-health-care-countries-2019)  
10 [2019](https://www.fraserinstitute.org/studies/comparing-performance-of-universal-health-care-countries-2019) (accessed 24 Aug 2020).  
11
- 12 16. O'Neill J, Tabish H, Welch V, et al. Applying an equity lens to interventions: using PROGRESS ensures  
13 consideration of socially stratifying factors to illuminate inequities in health. *J Clin Epidemiol*  
14 2014;67(1):56-64.  
15
- 16 17. Oliver S, Kavanagh J, Caird J, et al. Health promotion, inequalities and young people's health: a  
17 systematic review of research. London, UK: EPPI-Centre, Social Science Research Unit, Institute of  
18 Education, University of London 2008.  
19
- 20 21 18. Guyatt GH, Oxman AD, Sultan S, et al. GRADE guidelines: 9. Rating up the quality of evidence. *J Clin*  
22 *Epidemiol* 2011;64(12):1311-6.  
23
- 24 19. Guyatt G, Oxman AD, Akl EA, et al. GRADE guidelines: 1. Introduction-GRADE evidence profiles and  
25 summary of findings tables. *J Clin Epidemiol* 2011;64(4):383-94.  
26
- 27 20. Murad MH, Mustafa RA, Schünemann HJ, et al. Rating the certainty in evidence in the absence of a  
28 single estimate of effect. *Evid Based Med.* 2017;22(3):85-7.  
29
- 30 31 21. Iorio A, Spencer FA, Flavigna M, et al. Use of GRADE for assessment of evidence about prognosis: rating  
32 confidence in estimates of event rates in broad categories of patients, *BMJ* 2015;350:h870.  
33
- 34 22. Santesso N, Glenton C, Dahm P, et al. GRADE guidelines 26: informative statements to communicate the  
35 findings of systematic reviews of interventions. *J Clin Epidemiol* 2020;119:126-35.  
36
- 37 38 23. Azar KMJ, Shen Z, Romanelli RJ, et al. Disparities in outcomes among COVID-19 patients in a large health  
39 care system in California. *Health Aff (Millwood)* 2020:101377h1thaff202000598.  
40
- 41 24. Bhargava A, Fukushima EA, Levine M, et al. Predictors for severe COVID-19 infection. *Clin Infect Dis*  
42 2020.  
43
- 44 25. Bianchetti A, Rozzini R, Guerini F, et al. Clinical presentation of COVID19 in dementia patients. *J Nutr*  
45 *Health Aging* 2020;24(6):560-2.  
46
- 47 26. Borobia AM, Carcas AJ, Arnalich F, et al. a cohort of patients with COVID-19 in a major teaching hospital  
48 in Europe. *J Clin Med* 2020;9(6).  
49
- 50 27. Busetto L, Bettini S, Fabris R, et al. Obesity and COVID-19: an Italian snapshot. *Obesity (Silver Spring)*  
51 2020.  
52
- 53 28. Cecconi M, Piovani D, Brunetta E, et al. Early predictors of clinical deterioration in a cohort of 239  
54 patients hospitalized for COVID-19 infection in Lombardy, Italy. *J Clin Med* 2020;9(5).  
55  
56  
57  
58  
59  
60

- 1
- 2
- 3
- 4 29. Colaneri M, Sacchi P, Zuccaro V, et al. Clinical characteristics of coronavirus disease (COVID-19) early findings from a teaching hospital in Pavia, North Italy, 21 to 28 February 2020. *Euro Surveill* 2020;25(16).
- 5
- 6
- 7
- 8 30. Covino M, De Matteis G, Santoro M, et al. Clinical characteristics and prognostic factors in COVID-19 patients aged  $\geq 80$  years. *Geriatrics & Gerontology International* 2020.
- 9
- 10
- 11 31. Cummings MJ, Baldwin MR, Abrams D, et al. Epidemiology, clinical course, and outcomes of critically ill adults with COVID-19 in New York City: a prospective cohort study. *medRxiv* 2020.
- 12
- 13
- 14 32. D'Silva KM, Serling-Boyd N, Wallwork R, et al. Clinical characteristics and outcomes of patients with coronavirus disease 2019 (COVID-19) and rheumatic disease: a comparative cohort study from a US 'hot spot'. *Ann Rheum Dis* 2020.
- 15
- 16
- 17
- 18
- 19 33. Docherty AB, Harrison EM, Green CA, et al. Features of 20 133 UK patients in hospital with covid-19 using the ISARIC WHO clinical characterisation protocol: prospective observational cohort study. *BMJ (Clin Res Ed)* 2020;369:m1985.
- 20
- 21
- 22
- 23 34. El-Boghdadly K, Wong DJN, Owen R, et al. Risks to healthcare workers following tracheal intubation of patients with COVID-19: a prospective international multicentre cohort study. *Anaesthesia* 2020.
- 24
- 25
- 26
- 27 35. Giacomelli A, Ridolfo AL, Milazzo L, et al. 30-day mortality in patients hospitalized with COVID-19 during the first wave of the Italian epidemic: A prospective cohort study. *Pharmacol Res* 2020;158:104931.
- 28
- 29
- 30 36. Gold JAW, Wong KK, Szablewski CM, et al. Characteristics and clinical outcomes of adult patients hospitalized with COVID-19 - Georgia, March 2020. *MMWR Surveill Summ* 2020;69(18):545-50.
- 31
- 32
- 33 37. Hajifathalian K, Krisko T, Mehta A, et al. Gastrointestinal and hepatic manifestations of 2019 novel coronavirus disease in a large cohort of infected patients from new york: clinical implications. *Gastroenterol* 2020.
- 34
- 35
- 36
- 37
- 38 38. Hajifathalian K, Kumar S, Newberry C, et al. Obesity is associated with worse outcomes in COVID-19: analysis of early data from New York City. *Obesity (Silver Spring)* 2020.
- 39
- 40
- 41 39. Hamer M, Kivimaki M, Gale CR, et al. Lifestyle risk factors, inflammatory mechanisms, and COVID-19 hospitalization: A community-based cohort study of 387,109 adults in UK. *Brain Behav Immun* 2020.
- 42
- 43
- 44
- 45 40. Hur K, Price CPE, Gray EL, et al. Factors associated with intubation and prolonged intubation in hospitalized patients with COVID-19. *JAMA Otolaryngol Head Neck Surg* 2020:194599820929640.
- 46
- 47
- 48 41. Imam Z, Odish F, Gill I, et al. Older age and comorbidity are independent mortality predictors in a large cohort of 1305 COVID-19 patients in Michigan, United States. *J Intern Med* 2020.
- 49
- 50
- 51 42. Kalligeros M, Shehadeh F, Mylona EK, et al. Association of obesity with disease severity among patients with coronavirus disease 2019. *Obesity (Silver Spring)* 2020.
- 52
- 53
- 54
- 55 43. Klang E, Kassim G, Soffer S, et al. Morbid obesity as an independent risk factor for COVID-19 mortality in hospitalized patients younger than 50. *Obesity (Silver Spring)* 2020.
- 56
- 57
- 58
- 59
- 60

- 1  
2  
3  
4 44. Lassale C, Gaye B, Hamer M, et al. Ethnic disparities in hospitalisation for COVID-19 in England: The role  
5 of socioeconomic factors, mental health, and inflammatory and pro-inflammatory factors in a  
6 community-based cohort study. *Brain Behav Immun* 2020.  
7  
8  
9 45. Okoh AK, Sossou C, Dangayach NS, et al. Coronavirus disease 19 in minority populations of Newark, New  
10 Jersey. *Int J Equity Health* 2020;19(1):93.  
11  
12 46. Palaiodimos L, Kokkinidis DG, Li W, et al. Severe obesity, increasing age and male sex are independently  
13 associated with worse in-hospital outcomes, and higher in-hospital mortality, in a cohort of patients  
14 with COVID-19 in the Bronx, New York. *Metabolism* 2020;108:154262.  
15  
16 47. Patel AP, Paranjpe MD, Kathiresan NP, et al. Race, socioeconomic deprivation, and hospitalization for  
17 COVID-19 in english participants of a national biobank. *medRxiv* 2020.  
18  
19  
20 48. Perez-Guzman PN, Daunt A, Mukherjee S, et al. Report 17: Clinical characteristics and predictors of  
21 outcomes of hospitalized patients with COVID-19 in a London NHS Trust: a retrospective cohort study.  
22 *Imperial College London* 2020.  
23  
24 49. Petrilli CM, Jones SA, Yang J, et al. Factors associated with hospital admission and critical illness among  
25 5279 people with coronavirus disease 2019 in New York City: prospective cohort study. *BMJ (Clin Res Ed)*  
26 2020;369:m1966.  
27  
28  
29 50. Piano S, Dalbeni A, Vettore E, et al. Abnormal liver function tests predict transfer to intensive care unit  
30 and death in COVID-19. *Liv Int* 2020.  
31  
32 51. Price-Haywood EG, Burton J, Fort D, Seoane L. Hospitalization and mortality among black patients and  
33 white patients with covid-19. *NEJM* 2020.  
34  
35  
36 52. Shah V, Ko Ko T, Zuckerman M, et al. Poor outcome and prolonged persistence of SARS-CoV-2 RNA in  
37 COVID-19 patients with haematological malignancies; King's College Hospital experience. *Br J Haematol*  
38 2020.  
39  
40 53. Singh S, Khan A. clinical characteristics and outcomes of COVID-19 among patients with pre-existing liver  
41 disease in United States: a multi-center research network study. *Gastroenterol* 2020.  
42  
43 54. Singh S, Khan A, Chowdhry M, et al. Risk of severe COVID-19 in patients with inflammatory bowel  
44 disease in United States. a multicenter research network study. *Gastroenterol* 2020.  
45  
46  
47 55. Violi F, Cangemi R, Romiti GF, et al. Is albumin predictor of mortality in COVID-19 ? *Antioxid Redox Signal*  
48 2020.  
49  
50 56. Public Health England. Disparities in the risk and outcomes of COVID-19. London, UK: Public Health  
51 England 2020.  
52  
53  
54  
55  
56  
57  
58  
59  
60

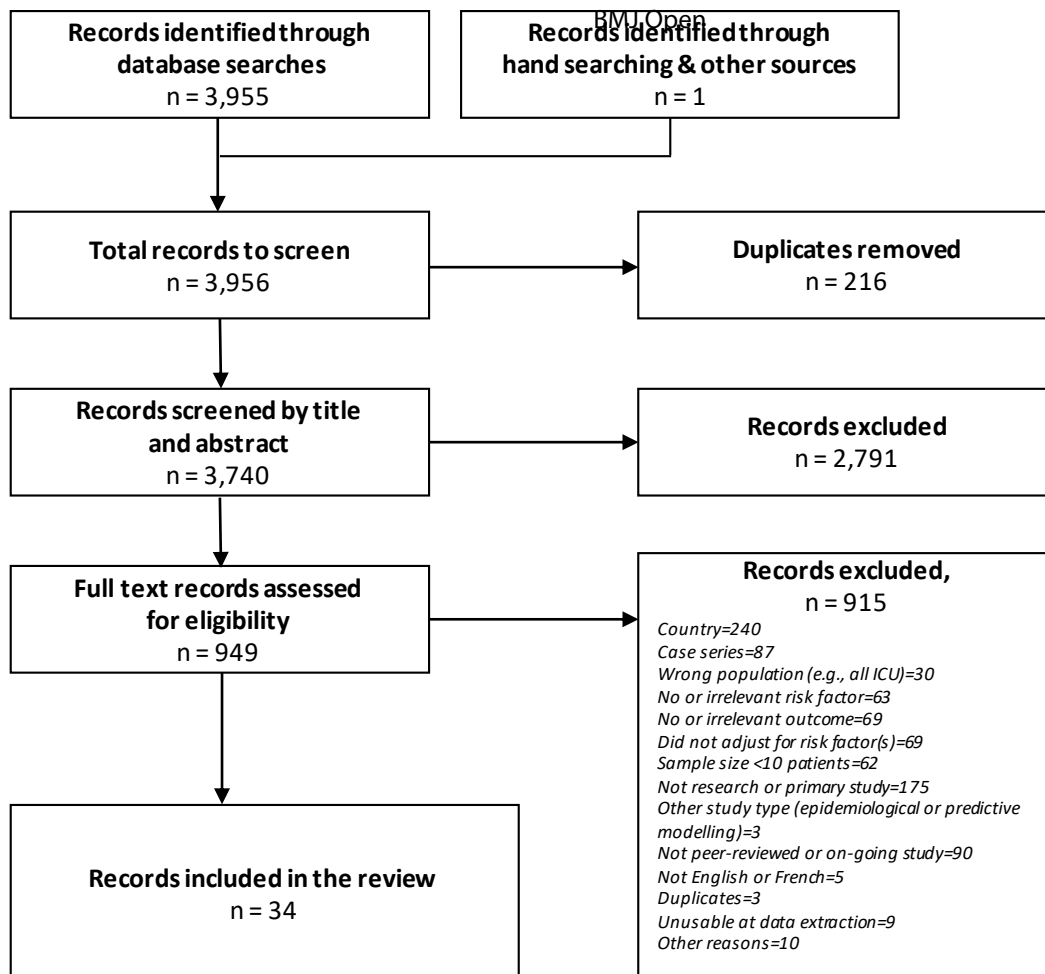

For peer review only - <http://bmjopen.bmj.com/site/about/guidelines.xhtml>

29  
30  
31  
Figure 1. PRISMA flow of study selection

1  
2  
3  
4  
5  
6  
7  
8  
9  
10  
11  
12  
13  
14  
15  
16  
17  
18  
19  
20  
21  
22  
23  
24  
25  
26  
27  
28  
29  
30  
31  
32  
33  
34  
35  
36  
37  
38  
39  
40  
41  
42  
43  
44  
45  
46  
47  
48  
49  
50  
51  
52  
53  
54  
55  
56  
57  
58  
59  
60

**Supplement File**

| <b>Supplement</b> | <b>Title</b>                               | <b>Page</b> |
|-------------------|--------------------------------------------|-------------|
| 1                 | Search strategy                            | 2           |
| 2                 | Eligibility criteria                       | 4           |
| 3                 | Excluded studies                           | 6           |
| 4                 | Characteristics of included studies        | 73          |
| 5                 | All results data from the included studies | 84          |

For peer review only

1  
2  
3 **Supplement 1. Search strategy**  
4

5 **Ovid MEDLINE(R) All 1946 to June 15, 2020**  
6

|                                                                |                                                                                                                                                                                                                                                                                                                                                                                                                                                                                                                                                                                                                                                                                                                                                                                                                                                               |
|----------------------------------------------------------------|---------------------------------------------------------------------------------------------------------------------------------------------------------------------------------------------------------------------------------------------------------------------------------------------------------------------------------------------------------------------------------------------------------------------------------------------------------------------------------------------------------------------------------------------------------------------------------------------------------------------------------------------------------------------------------------------------------------------------------------------------------------------------------------------------------------------------------------------------------------|
| 7<br>8<br>9<br>10<br>11                                        | 1 (Risk factor* or relative risk or odds ratio or between group* or Regression or multi-variate or multivaria* or covariate or univariate or co-variate or matching or ANOVA or Analysis of variance or ANCOVA or Correlation or Covariance or Principal Component Analysis or cohort* or follow-up or prognos* or predict*).mp.                                                                                                                                                                                                                                                                                                                                                                                                                                                                                                                              |
| 12                                                             | 2 exp cohort studies/ or cohort*.mp.                                                                                                                                                                                                                                                                                                                                                                                                                                                                                                                                                                                                                                                                                                                                                                                                                          |
| 13<br>14<br>15                                                 | 3 ("Associated with" or "Association of" or "impact of" or "Correlated with" or "Impact* on" or characteristics or characterise or features or clinical findings or clinical outcomes or clinical manifestations or clinical course).ti.                                                                                                                                                                                                                                                                                                                                                                                                                                                                                                                                                                                                                      |
| 16                                                             | 4 (clinical data or (clinical adj5 (characteristics or features or manifestations))).tw,kf.                                                                                                                                                                                                                                                                                                                                                                                                                                                                                                                                                                                                                                                                                                                                                                   |
| 17                                                             | 5 1 or 2 or 3 or 4                                                                                                                                                                                                                                                                                                                                                                                                                                                                                                                                                                                                                                                                                                                                                                                                                                            |
| 18<br>19<br>20<br>21<br>22<br>23<br>24                         | 6 (Mortal* or fatal* or death* or died or discharged alive or poor prognos* or good prognos* or clinical outcome* or adverse outcome* or disease course or clinical course or ((severe* or serious* or critical*) adj4 (ill* or outcome* or course or case or cases or patient* or condition)) or Severity or ((ICU or hospital or intensive care) adj7 (admission* or admit*)) or Ventilator* or ventilation or Hospitaliz* or hospitalis* or (Length adj3 stay)).mp.                                                                                                                                                                                                                                                                                                                                                                                        |
| 25                                                             | 7 ((pregnan* or maternal or perinatal or birth or neonat* or infant*) adj7 outcome*).mp.                                                                                                                                                                                                                                                                                                                                                                                                                                                                                                                                                                                                                                                                                                                                                                      |
| 26                                                             | 8 6 or 7                                                                                                                                                                                                                                                                                                                                                                                                                                                                                                                                                                                                                                                                                                                                                                                                                                                      |
| 27                                                             | 9 5 and 8                                                                                                                                                                                                                                                                                                                                                                                                                                                                                                                                                                                                                                                                                                                                                                                                                                                     |
| 28<br>29                                                       | 10 (Coronavirus* or corona-virus* or betacoronavirus* or nCOV* or 2019nCoV or 2019-ncov or covid or covid19 or SARS-CoV* or SARSCov*).mp.                                                                                                                                                                                                                                                                                                                                                                                                                                                                                                                                                                                                                                                                                                                     |
| 30                                                             | 11 limit 10 to yr="2020 -Current"                                                                                                                                                                                                                                                                                                                                                                                                                                                                                                                                                                                                                                                                                                                                                                                                                             |
| 31                                                             | 12 limit 11 to abstracts                                                                                                                                                                                                                                                                                                                                                                                                                                                                                                                                                                                                                                                                                                                                                                                                                                      |
| 32                                                             | 13 (11 not 12) and (1 or 2 or 3 or 4 or 6 or 7)                                                                                                                                                                                                                                                                                                                                                                                                                                                                                                                                                                                                                                                                                                                                                                                                               |
| 33                                                             | 14 9 and 11                                                                                                                                                                                                                                                                                                                                                                                                                                                                                                                                                                                                                                                                                                                                                                                                                                                   |
| 34                                                             | 15 13 or 14                                                                                                                                                                                                                                                                                                                                                                                                                                                                                                                                                                                                                                                                                                                                                                                                                                                   |
| 35<br>36<br>37<br>38<br>39<br>40<br>41<br>42<br>43<br>44       | 16 (exp China/ or Iran/ or exp Russia/) not (canada/ or exp united states/ or europe/ or austria/ or belgium/ or exp france/ or exp germany/ or exp united kingdom/ or exp italy/ or spain/ or netherlands/ or exp "scandinavian and nordic countries"/ or australia/ or new zealand/ or mexico/ or chile/ or colombia/ or exp japan/ or korea/ or exp "republic of korea"/ or baltimore/ or berlin/ or boston/ or chicago/ or "district of columbia"/ or london/ or los angeles/ or new orleans/ or new york city/ or paris/ or philadelphia/ or rome/ or san francisco/ or estonia/ or latvia/ or lithuania/ or czech republic/ or hungary/ or poland/ or slovakia/ or slovenia/ or greece/ or luxembourg/ or portugal/ or switzerland/ or israel/ or turkey/)                                                                                              |
| 45<br>46<br>47<br>48<br>49<br>50<br>51<br>52<br>53<br>54<br>55 | 17 ((China or wuhan or hubei or beijing).tw,kf. and china.in.) not (canada or italy or italian or spain or spanish or france or french or united kingdom or UK or england or english or NHS or ireland or irish or wales or welsh or scotland or scottish or german* or austria* or sweden or swedish or netherlands or norwegian or norway or finland or finnish or denmark or danish or european or belgium or belgian or Czech or Estonia* or Greece or Greek or Hungar* or Latvia* or Lithuania* or Luxembourg or Iceland* or Poland or Portugal or Slovak Republic or Slovenia* or Switzerland or Japan* or Tokyo or Korea* or Seoul or Chile* or Colombia* or Mexico or Mexican or Israel* or Turkey or Turkish or australia* or new zealand* or united states or USA or american or "U.S." or new york or california* or washington or seattle).tw,kf. |

|    |                                                                                                                                                                                                                                                                                                                                                                                                                                                                                                                                                                                                                                                                                                                                                                                                                                             |
|----|---------------------------------------------------------------------------------------------------------------------------------------------------------------------------------------------------------------------------------------------------------------------------------------------------------------------------------------------------------------------------------------------------------------------------------------------------------------------------------------------------------------------------------------------------------------------------------------------------------------------------------------------------------------------------------------------------------------------------------------------------------------------------------------------------------------------------------------------|
| 18 | ((russia* or iran* or tehran or brazil*) not (canada or italy or italian or spain or spanish or france or french or united kingdom or UK or england or english or NHS or ireland or irish or wales or welsh or scotland or scottish or german* or austria* or sweden or swedish or netherlands or norwegian or norway or finland or finnish or denmark or danish or european or belgium or belgian or Czech or Estonia* or Greece or Greek or Hungar* or Latvia* or Lithuania* or Luxembourg or Iceland* or Poland or Portugal or Slovak Republic or Slovenia* or Switzerland or Japan* or Tokyo or Korea* or Seoul or Chile* or Colombia* or Mexico or Mexican or Israel* or Turkey or Turkish or australia* or new zealand* or united states or USA or american or "U.S." or new york or california* or washington or seattle)).tw,kf.    |
| 19 | ((china or russia or iran or tehran or Brazil) not (canada or italy or italian or spain or spanish or france or french or united kingdom or UK or england or english or NHS or ireland or irish or wales or welsh or scotland or scottish or german* or austria* or sweden or swedish or netherlands or norwegian or norway or finland or finnish or denmark or danish or european or belgium or belgian or Czech or Estonia* or Greece or Greek or Hungar* or Latvia* or Lithuania* or Luxembourg or Iceland* or Poland or Portugal or Slovak Republic or Slovenia* or Switzerland or Japan* or Tokyo or Korea* or Seoul or Chile* or Colombia* or Mexico or Mexican or Israel* or Turkey or Turkish or australia* or new zealand* or united states or USA or american or "U.S." or new york or california* or washington or seattle)).in. |
| 20 | 15 not (16 or 17 or 18 or 19)                                                                                                                                                                                                                                                                                                                                                                                                                                                                                                                                                                                                                                                                                                                                                                                                               |
| 21 | limit 20 to (english or french)                                                                                                                                                                                                                                                                                                                                                                                                                                                                                                                                                                                                                                                                                                                                                                                                             |
| 22 | limit 21 to editorial                                                                                                                                                                                                                                                                                                                                                                                                                                                                                                                                                                                                                                                                                                                                                                                                                       |
| 23 | 21 not 22                                                                                                                                                                                                                                                                                                                                                                                                                                                                                                                                                                                                                                                                                                                                                                                                                                   |
| 24 | Remove duplicates from 23                                                                                                                                                                                                                                                                                                                                                                                                                                                                                                                                                                                                                                                                                                                                                                                                                   |

### Online databases, hand-searched up to June 12, 2020:

Epistimonikos COVID-19 in L\*VE Platform (epidemiology, etiology and prognosis questions) at: [https://app.iloveevidence.com/loves/5e6fdb9669c00e4ac072701d?utm=epdb\\_en](https://app.iloveevidence.com/loves/5e6fdb9669c00e4ac072701d?utm=epdb_en)

McMaster COVID-19 Evidence Alerts (prognosis or etiology studies) at: <https://plus.mcmaster.ca/COVID-19/>

## Supplement 2. Eligibility criteria

| Criterion                       | Include                                                                                                                                                                                                                                                                                                                                                                                                                                                                                                                                                                                                                                                                                                                                                                                                                                                                                                                                                                                                                                                                                           | Exclude                                                                                                                                                                                                                                                                                    |
|---------------------------------|---------------------------------------------------------------------------------------------------------------------------------------------------------------------------------------------------------------------------------------------------------------------------------------------------------------------------------------------------------------------------------------------------------------------------------------------------------------------------------------------------------------------------------------------------------------------------------------------------------------------------------------------------------------------------------------------------------------------------------------------------------------------------------------------------------------------------------------------------------------------------------------------------------------------------------------------------------------------------------------------------------------------------------------------------------------------------------------------------|--------------------------------------------------------------------------------------------------------------------------------------------------------------------------------------------------------------------------------------------------------------------------------------------|
| <b>Population/<br/>Exposure</b> | <p>P<sup>2</sup>ROGRESS risk factors<sup>1</sup>, with or without infection with COVID-19<sup>2</sup></p> <p><sup>1</sup>Risk factors include:</p> <ul style="list-style-type: none"> <li>- Pre-existing disease/condition, disability (e.g., chronic disease, immunocompromised, pregnancy)</li> <li>- Place/state of residence (e.g., remote, overcrowding, homeless, institutionalization)</li> <li>- Race/ethnicity/culture/language/immigrant/refugee status</li> <li>- Occupation</li> <li>- Gender identity/sex</li> <li>- Religion/belief system</li> <li>- Education/literacy level</li> <li>- Socio-economic status</li> <li>- Social capital (e.g., social support/networks/trust)</li> <li>- Age</li> <li>- Other (risk behaviours e.g., drug and alcohol use disorders, smoking)</li> </ul> <p><sup>2</sup>COVID-19 infection may include lab-confirmed, or epidemiologically-linked cases (e.g., transmission/cases within households). Cases with co-infections (e.g., influenza such as H1N1) will be accepted, but may be analyzed separately from COVID-19-only infections.</p> | <p>Studies including populations with pandemic-related infections (e.g., SARS, MERS) without data isolated for COVID-19</p>                                                                                                                                                                |
| <b>Comparator</b>               | <p>Staged, in the following order:</p> <ol style="list-style-type: none"> <li>i) The same P<sup>2</sup>ROGRESS factor experienced differently or to a different degree (e.g., higher or lower socioeconomic status, higher or lower literacy level) or the absence of a P<sup>2</sup>ROGRESS factor (e.g., non-refugee; no pre-existing disease).</li> <li>ii) None (in some circumstances such as pregnancy and immunocompromised)</li> </ol>                                                                                                                                                                                                                                                                                                                                                                                                                                                                                                                                                                                                                                                    | <p>Not applicable</p>                                                                                                                                                                                                                                                                      |
| <b>Outcomes</b>                 | <p>Primary outcomes<sup>3</sup></p> <ul style="list-style-type: none"> <li>- Hospitalization rate (including readmissions)</li> <li>- Hospital length of stay (binary or continuous)</li> <li>- Admission to ICU</li> <li>- ICU length of stay (binary or continuous)</li> <li>- Need for mechanical ventilation</li> <li>- Case fatality</li> <li>- All-cause fatality</li> <li>- Severe or critical infection (composite; as defined by authors)</li> </ul> <p><sup>3</sup>Data may be extracted for outcomes listed above for the following population denominators, in order of priority:</p> <ol style="list-style-type: none"> <li>i) General population</li> <li>ii) Population positive for COVID-19</li> <li>iii) Population hospitalized for COVID-19</li> <li>iv) Population with a risk factor</li> </ol>                                                                                                                                                                                                                                                                             | <p>COVID-19 infection requiring outpatient treatment (e.g., treatment at primary care office, attendance at ED)</p> <p>Hospitalization for an illness other than COVID-19 infection</p> <p>Outcomes post-hospital discharge (e.g., readmissions unrelated to index COVID-19 infection)</p> |
| <b>Timing</b>                   | <p>Any follow-up duration</p>                                                                                                                                                                                                                                                                                                                                                                                                                                                                                                                                                                                                                                                                                                                                                                                                                                                                                                                                                                                                                                                                     | <p>Not applicable</p>                                                                                                                                                                                                                                                                      |



| Criterion    | Include                                                                                                                                                                | Exclude                               |
|--------------|------------------------------------------------------------------------------------------------------------------------------------------------------------------------|---------------------------------------|
| Setting      | OECD countries ( <a href="https://www.oecd.org/about/document/list-oecd-member-countries.htm">https://www.oecd.org/about/document/list-oecd-member-countries.htm</a> ) | Non-OECD countries                    |
| Study design | Prospective and retrospective cohort studies                                                                                                                           | Studies of interventions/treatments   |
| Language     | Full text in English or French; pre-prints if accepted for publication in a peer-reviewer journal.                                                                     | Language other than English or French |

COVID-19: novel coronavirus 2019; ED: emergency department; ICU: intensive care unit; MERS: Middle East Respiratory Syndrome; MV: mechanical ventilation; OECD: Organisation for Economic Co-operation and Development; SARS: severe acute respiratory syndrome

For peer review only

### Supplement 3. Excluded studies

#### Excluded – case series (n=87)

1. Akdur A, Karakaya E, Ayvazoglu Soy EH, Alshalabi O, Kirnap M, Arslan H, et al. Coronavirus Disease (COVID-19) in Kidney and Liver Transplant Patients: A Single-Center Experience. *Exp Clin Transplant*. 2020;18(3):270-4.
2. Albalate M, Arribas P, Torres E, Cintra M, Alcazar R, Puerta M, et al. High prevalence of asymptomatic COVID-19 in haemodialysis: learning day by day in the first month of the COVID-19 pandemic. *Alta prevalencia de COVID-19 asintomatico en hemodialisis Aprendiendo dia a dia el primer mes de pandemia de COVID-19*. 2020.
3. Alberici F, Delbarba E, Manenti C, Econimo L, Valerio F, Pola A, et al. A report from the Brescia Renal COVID Task Force on the clinical characteristics and short-term outcome of hemodialysis patients with SARS-CoV-2 infection. *Kidney international*. 2020.
4. Alberici F, Delbarba E, Manenti C, Econimo L, Valerio F, Pola A, et al. A single center observational study of the clinical characteristics and short-term outcome of 20 kidney transplant patients admitted for SARS-CoV2 pneumonia. *Kidney international*. 2020;97(6):1083-8.
5. Aries JA, Davies JK, Auer RL, Hallam SL, Montoto S, Smith M, et al. Clinical outcome of coronavirus disease 2019 in haemato-oncology patients. *British journal of haematology*. 2020.
6. Arslan H, Musabak U, Ayvazoglu Soy EH, Kurt Azap O, Sayin B, Akcay S, et al. Incidence and Immunologic Analysis of Coronavirus Disease (COVID-19) in Hemodialysis Patients: A Single-Center Experience. *Experimental and clinical transplantation : official journal of the Middle East Society for Organ Transplantation*. 2020;18(3):275-83.
7. Bezzio C, Saibeni S, Variola A, Allocca M, Massari A, Gerardi V, et al. Outcomes of COVID-19 in 79 patients with IBD in Italy: an IG-IBD study. *Gut*. 2020;69(7):1213-7.
8. Biagi A, Rossi L, Malagoli A, Zanni A, Sticozzi C, Comastri G, et al. Clinical and epidemiological characteristics of 320 deceased patients with COVID-19 in an Italian Province: A retrospective observational study. *J Med Virol*. 2020.
9. Bode B, Garrett V, Messler J, McFarland R, Crowe J, Booth R, et al. Glycemic Characteristics and Clinical Outcomes of COVID-19 Patients Hospitalized in the United States. *Journal of diabetes science and technology*. 2020:1932296820924469.
10. Breazzano MP, Shen J, Abdelhakim AH, Dagi Glass L, Horowitz J, Xie SX, et al. New York City COVID-19 resident physician exposure during exponential phase of pandemic. *The Journal of clinical investigation*. 2020.
11. Breazzano MP, Shen J, Abdelhakim AH, Glass LRD, Horowitz JD, Xie SX, et al. Resident physician exposure to novel coronavirus (2019-nCoV, SARS-CoV-2) within New York City during exponential phase of COVID-19 pandemic: Report of the New York City Residency Program Directors COVID-19 Research Group. *medRxiv : the preprint server for health sciences*. 2020.

12. Brenner EJ, Ungaro RC, Geary RB, Kaplan GG, Kissous-Hunt M, Lewis JD, et al. Corticosteroids, but not TNF Antagonists, are Associated with Adverse COVID-19 Outcomes in Patients With Inflammatory Bowel Diseases: Results from an International Registry. *Gastroenterology*. 2020.
13. Cariou B, Hadjadj S, Wargny M, Pichelin M, Al-Salameh A, Allix I, et al. Phenotypic characteristics and prognosis of inpatients with COVID-19 and diabetes: the CORONADO study. *Diabetologia*. 2020.
14. Caron B, Arondel Y, Reimund J-M. Covid-19 and inflammatory bowel disease: questions on incidence, severity, and impact of treatment? *Clinical gastroenterology and hepatology : the official clinical practice journal of the American Gastroenterological Association*. 2020.
15. Chao JY, Derespina KR, Herold BC, Goldman DL, Aldrich M, Weingarten J, et al. Clinical Characteristics and Outcomes of Hospitalized and Critically Ill Children and Adolescents with Coronavirus Disease 2019 (COVID-19) at a Tertiary Care Medical Center in New York City. *The Journal of pediatrics*. 2020.
16. Columbia University Kidney Transplant P. Early Description of Coronavirus 2019 Disease in Kidney Transplant Recipients in New York. *Journal of the American Society of Nephrology : JASN*. 2020;31(6):1150-6.
17. Cook G, John Ashcroft A, Pratt G, Popat R, Ramasamy K, Kaiser M, et al. Real-world assessment of the clinical impact of symptomatic infection with severe acute respiratory syndrome coronavirus (COVID-19 disease) in patients with multiple myeloma receiving systemic anti-cancer therapy. *British journal of haematology*. 2020.
18. Crespo M, Pérez-Sáez MJ, Redondo-Pachón D, Llinàs-Mallof L, Montero MM, Villar-García J, et al. COVID-19 in elderly kidney transplant recipients. *Am J Transplant*. 2020.
19. de Marinis F, Attili I, Morganti S, Stati V, Spitaleri G, Gianoncelli L, et al. Results of Multilevel Containment Measures to Better Protect Lung Cancer Patients From COVID-19: The IEO Model. *Frontiers in oncology*. 2020;10:665.
20. de Rojas T, Perez-Martinez A, Cela E, Baragano M, Galan V, Mata C, et al. COVID-19 infection in children and adolescents with cancer in Madrid. *Pediatric blood & cancer*. 2020;67(7):e28397.
21. Edler C, Schroder AS, Aepfelbacher M, Fitzek A, Heinemann A, Heinrich F, et al. Dying with SARS-CoV-2 infection-an autopsy study of the first consecutive 80 cases in Hamburg, Germany. *International journal of legal medicine*. 2020.
22. Egol KA, Konda SR, Bird ML, Dedhia N, Landes EK, Ranson RA, et al. Increased Mortality and Major Complications in Hip Fracture Care During the COVID-19 Pandemic: A New York City Perspective. *Journal of orthopaedic trauma*. 2020.
23. Emmi G, Bettiol A, Mattioli I, Silvestri E, Di Scala G, Urban ML, et al. SARS-CoV-2 infection among patients with systemic autoimmune diseases. *Autoimmun Rev*. 2020;19(7):102575.

24. Fattizzo B, Giannotta JA, Sciume M, Cattaneo D, Bucelli C, Fracchiolla NS, et al. Reply to "COVID-19 in persons with haematological cancers": a focus on myeloid neoplasms and risk factors for mortality. *Leukemia*. 2020.
25. Felice C, Nardin C, Di Tanna GL, Grossi U, Bernardi E, Scaldaferri L, et al. Use of RAAS inhibitors and risk of clinical deterioration in COVID-19: results from an Italian cohort of 133 hypertensives. *American journal of hypertension*. 2020.
26. Fox SE, Akmatbekov A, Harbert JL, Li G, Quincy Brown J, Vander Heide RS. Pulmonary and cardiac pathology in African American patients with COVID-19: an autopsy series from New Orleans. *Lancet Respir Med*. 2020.
27. Fung M, Chiu CY, DeVoe C, Doernberg SB, Schwartz BS, Langelier C, et al. Clinical Outcomes and Serologic Response in Solid Organ Transplant Recipients with COVID-19: A Case Series from the United States. *American journal of transplantation : official journal of the American Society of Transplantation and the American Society of Transplant Surgeons*. 2020.
28. Gervasoni C, Meraviglia P, Riva A, Giacomelli A, Oreni L, Minisci D, et al. Clinical features and outcomes of HIV patients with coronavirus disease 2019. *Clinical infectious diseases : an official publication of the Infectious Diseases Society of America*. 2020.
29. Gianfrancesco M, Hyrich KL, Al-Adely S, Carmona L, Danila MI, Gossec L, et al. Characteristics associated with hospitalisation for COVID-19 in people with rheumatic disease: data from the COVID-19 Global Rheumatology Alliance physician-reported registry. *Annals of the rheumatic diseases*. 2020.
30. Gisondi P, Facheris P, Dapavo P, Piaserico S, Conti A, Naldi L, et al. The impact of the COVID-19 pandemic on patients with chronic plaque psoriasis being treated with biological therapy: the Northern Italy experience. *The British journal of dermatology*. 2020.
31. Goicoechea M, Sánchez Cámara LA, Macías N, Muñoz de Morales A, Rojas Á G, Bascañana A, et al. COVID-19: clinical course and outcomes of 36 hemodialysis patients in Spain. *Kidney Int*. 2020;98(1):27-34.
32. Goldfarb IT, Clapp MA, Soffer MD, Shook LL, Rushfirth K, Edlow AG, et al. Prevalence and Severity of Coronavirus Disease 2019 (COVID-19) Illness in Symptomatic Pregnant and Postpartum Women Stratified by Hispanic Ethnicity. *Obstetrics and gynecology*. 2020.
33. Gubatan J, Levitte S, Patel A, Balabanis T, Sharma A, Jones E, et al. Prevalence, risk factors and clinical outcomes of COVID-19 in patients with a history of pancreatitis in Northern California. *Gut*. 2020.
34. Hirshberg A, Kern-Goldberger AR, Levine LD, Pierce-Williams R, Short WR, Parry S, et al. Care of critically ill pregnant patients with COVID-19: a case series. *American journal of obstetrics and gynecology*. 2020.
35. Husain SA, Dube G, Morris H, Fernandez H, Chang J-H, Paget K, et al. Early Outcomes of Outpatient Management of Kidney Transplant Recipients with Coronavirus Disease 2019. *Clinical journal of the American Society of Nephrology : CJASN*. 2020.
36. Iavarone M, D'Ambrosio R, Soria A, Triolo M, Pugliese N, Del Poggio P, et al. High rates of 30-day mortality in patients with cirrhosis and COVID-19. *Journal of hepatology*. 2020.

- 1  
2  
3 37. Jung HY, Lim JH, Kang SH, Kim SG, Lee YH, Lee J, et al. Outcomes of COVID-19  
4 among Patients on In-Center Hemodialysis: An Experience from the Epicenter in South Korea. *J*  
5 *Clin Med.* 2020;9(6).  
6
- 7 38. Khera R, Clark C, Lu Y, Guo Y, Ren S, Truax B, et al. Association of Angiotensin-  
8 Converting Enzyme Inhibitors and Angiotensin Receptor Blockers with the Risk of  
9 Hospitalization and Death in Hypertensive Patients with Coronavirus Disease-19. *medRxiv : the*  
10 *preprint server for health sciences.* 2020.  
11
- 12 39. Knight M, Bunch K, Vousden N, Morris E, Simpson N, Gale C, et al. Characteristics and  
13 outcomes of pregnant women admitted to hospital with confirmed SARS-CoV-2 infection in UK:  
14 national population based cohort study. *BMJ (Clinical research ed).* 2020;369:m2107.  
15
- 16 40. Kuderer NM, Choueiri TK, Shah DP, Shyr Y, Rubinstein SM, Rivera DR, et al. Clinical  
17 impact of COVID-19 on patients with cancer (CCC19): a cohort study. *Lancet (London,*  
18 *England).* 2020.  
19
- 20 41. Kutlu Ö, Metin A. Dermatological diseases presented before COVID-19: Are patients  
21 with psoriasis and superficial fungal infections more vulnerable to the COVID-19? *Dermatol*  
22 *Ther.* 2020:e13509.  
23
- 24 42. LeBrun DG, Konnaris MA, Ghahramani GC, Premkumar A, DeFrancesco CJ, Gruskay  
25 JA, et al. Hip Fracture Outcomes During the COVID-19 Pandemic: Early Results from New  
26 York. *Journal of orthopaedic trauma.* 2020.  
27
- 28 43. Lee LYW, Cazier JB, Starkey T, Turnbull CD, Team UKCCMP, Kerr R, et al. COVID-19  
29 mortality in patients with cancer on chemotherapy or other anticancer treatments: a prospective  
30 cohort study. *Lancet (London, England).* 2020.  
31
- 32 44. Lescure FX, Bouadma L, Nguyen D, Parisey M, Wicky PH, Behillil S, et al. Clinical and  
33 virological data of the first cases of COVID-19 in Europe: a case series. *The Lancet Infectious*  
34 *diseases.* 2020;20(6):697-706.  
35
- 36 45. Lim J-H, Park S-H, Jeon Y, Cho J-H, Jung H-Y, Choi J-Y, et al. Fatal Outcomes of  
37 COVID-19 in Patients with Severe Acute Kidney Injury. *Journal of clinical medicine.* 2020;9(6).  
38
- 39 46. Mannheim J, Gretsche S, Layden JE, Fricchione MJ. Characteristics of Hospitalized  
40 Pediatric COVID-19 Cases - Chicago, Illinois, March - April 2020. *Journal of the Pediatric*  
41 *Infectious Diseases Society.* 2020.  
42
- 43 47. Marcault C, Fodil S, Dupont T, Darmon M, Azoulay E. In response to the letter of  
44 Montagud-Marrahi et al. *American journal of transplantation : official journal of the American*  
45 *Society of Transplantation and the American Society of Transplant Surgeons.* 2020.  
46
- 47 48. Martin-Moro F, Marquet J, Piris M, Michael BM, Saez AJ, Corona M, et al. Survival study  
48 of hospitalised patients with concurrent COVID-19 and haematological malignancies. *British*  
49 *journal of haematology.* 2020.  
50
- 51 49. Martinez-Perez O, Vouga M, Cruz Melguizo S, Forcen Acebal L, Panchaud A, Munoz-  
52 Chapuli M, et al. Association Between Mode of Delivery Among Pregnant Women With COVID-  
53 19 and Maternal and Neonatal Outcomes in Spain. *JAMA.* 2020.  
54  
55  
56  
57  
58  
59

- 1  
2  
3 50. Mathian A, Amoura Z. Response to: Correspondence regarding research letter to the  
4 editor by Mathian et al, 'Clinical course of coronavirus disease 2019 (COVID-19) in a series of  
5 17 patients with systemic lupus under long-term treatment with hydroxychloroquine" by Nikpour  
6 et al. *Annals of the rheumatic diseases*. 2020.  
7
- 8 51. Mathian A, Mahevas M, Rohmer J, Roumier M, Cohen-Aubart F, Amador-Borrero B, et  
9 al. Clinical course of coronavirus disease 2019 (COVID-19) in a series of 17 patients with  
10 systemic lupus erythematosus under long-term treatment with hydroxychloroquine. *Annals of*  
11 *the rheumatic diseases*. 2020;79(6):837-9.  
12
- 13 52. Matsuo K, Novatt H, Matsuzaki S, Hom MS, Castaneda AV, Licon E, et al. Wait-time for  
14 hysterectomy and survival of women with early-stage cervical cancer: A clinical implication  
15 during the coronavirus pandemic. *Gynecol Oncol*. 2020;158(1):37-43.  
16
- 17 53. Mehta V, Goel S, Kabarriti R, Cole D, Goldfinger M, Acuna-Villaorduna A, et al. Case  
18 Fatality Rate of Cancer Patients with COVID-19 in a New York Hospital System. *Cancer*  
19 *discovery*. 2020.  
20
- 21 54. Meloni M, Izzo V, Giurato L, Gandini R, Uccioli L. Management of diabetic persons with  
22 foot ulceration during COVID-19 health care emergency: Effectiveness of a new triage pathway.  
23 *Diabetes research and clinical practice*. 2020;165:108245.  
24
- 25 55. Mendoza M, Garcia-Ruiz I, Maiz N, Rodo C, Garcia-Manau P, Serrano B, et al. Pre-  
26 eclampsia-like syndrome induced by severe COVID-19: a prospective observational study. *Bjog*.  
27 2020.  
28
- 29 56. Menter T, Haslbauer JD, Nienhold R, Savic S, Deigendesch H, Frank S, et al.  
30 Postmortem examination of COVID-19 patients reveals diffuse alveolar damage with severe  
31 capillary congestion and variegated findings in lungs and other organs suggesting vascular  
32 dysfunction. *Histopathology*. 2020.  
33
- 34 57. Michelle L, Meredith A, Rebecca C-S, Jun L, John L, Samuel S, et al. Kidney Allograft  
35 Recipients Diagnosed with Coronavirus Disease-2019: A Single Center Report. *medRxiv*. 2020.  
36
- 37 58. Munoz Vives JM, Jornet-Gibert M, Camara-Cabrera J, Esteban PL, Brunet L, Delgado-  
38 Flores L, et al. Mortality Rates of Patients with Proximal Femoral Fracture in a Worldwide  
39 Pandemic: Preliminary Results of the Spanish HIP-COVID Observational Study. *The Journal of*  
40 *bone and joint surgery American volume*. 2020.  
41
- 42 59. Parri N, Magista AM, Marchetti F, Cantoni B, Arrighini A, Romanengo M, et al.  
43 Characteristic of COVID-19 infection in pediatric patients: early findings from two Italian  
44 Pediatric Research Networks. *European journal of pediatrics*. 2020.  
45
- 46 60. Pereira A, Cruz-Melguizo S, Adrien M, Fuentes L, Marin E, Perez-Medina T. Clinical  
47 course of coronavirus disease-2019 in pregnancy. *Acta obstetrica et gynecologica*  
48 *Scandinavica*. 2020.  
49
- 50 61. Pereira MR, Mohan S, Cohen DJ, Husain SA, Dube GK, Ratner LE, et al. COVID-19 in  
51 solid organ transplant recipients: Initial report from the US epicenter. *American journal of*  
52 *transplantation : official journal of the American Society of Transplantation and the American*  
53 *Society of Transplant Surgeons*. 2020.  
54  
55  
56  
57  
58  
59  
60

- 1  
2  
3 62. Pierce-Williams RAM, Burd J, Felder L, Khoury R, Bernstein PS, Avila K, et al. Clinical  
4 course of severe and critical COVID-19 in hospitalized pregnancies: a US cohort study.  
5 American journal of obstetrics & gynecology MFM. 2020:100134.  
6
- 7 63. Quartuccio L, Valent F, Pasut E, Tascini C, De Vita S. Prevalence of COVID-19 among  
8 patients with chronic inflammatory rheumatic diseases treated with biologic agents or small  
9 molecules: A population-based study in the first two months of COVID-19 outbreak in Italy. Joint  
10 Bone Spine. 2020.  
11
- 12 64. Razanamahery J, Soumagne T, Humbert S, Brunel AS, Lepiller Q, Daguindau E, et al.  
13 Does type of immunosuppression influence the course of Covid-19 infection? The Journal of  
14 infection. 2020.  
15
- 16 65. Robilotti EV, Babady NE, Mead PA, Rolling T, Perez-Johnston R, Bernardes M, et al.  
17 Determinants of Severity in Cancer Patients with COVID-19 Illness. medRxiv : the preprint  
18 server for health sciences. 2020.  
19
- 20 66. Rodriguez-Lago I, Ramirez de la Piscina P, Elorza A, Merino O, Ortiz de Zarate J,  
21 Cabriada JL. Characteristics and prognosis of patients with inflammatory bowel disease during  
22 the SARS-CoV-2 pandemic in the Basque Country (Spain). Gastroenterology. 2020.  
23
- 24 67. Sabatino J, Ferrero P, Chessa M, Bianco F, Ciliberti P, Secinaro A, et al. COVID-19 and  
25 Congenital Heart Disease: Results from a Nationwide Survey. Journal of clinical medicine.  
26 2020;9(6).  
27
- 28 68. Safavi F, Nourbakhsh B, Azimi AR. B-cell depleting therapies may affect susceptibility to  
29 acute respiratory illness among patients with multiple sclerosis during the early COVID-19  
30 epidemic in Iran. Mult Scler Relat Disord. 2020;43:102195.  
31
- 32 69. Sanchez-Piedra C, Diaz-Torne C, Manero J, Pego-Reigosa JM, Rua-Figueroa I,  
33 Gonzalez-Gay MA, et al. Clinical features and outcomes of COVID-19 in patients with rheumatic  
34 diseases treated with biological and synthetic targeted therapies. Annals of the rheumatic  
35 diseases. 2020.  
36
- 37 70. Shabto JM, Loerinc L, O'Keefe GA, O'Keefe J. Characteristics and outcomes of COVID-  
38 19 positive patients with diabetes managed as outpatients. Diabetes research and clinical  
39 practice. 2020;164:108229.  
40
- 41 71. Shalev N, Scherer M, LaSota ED, Antoniou P, Yin MT, Zucker J, et al. Clinical  
42 characteristics and outcomes in people living with HIV hospitalized for COVID-19. Clinical  
43 infectious diseases : an official publication of the Infectious Diseases Society of America. 2020.  
44
- 45 72. Stochino C, Villa S, Zucchi P, Parravicini P, Gori A, Raviglione MC. Clinical  
46 characteristics of COVID-19 and active tuberculosis co-infection in an Italian reference hospital.  
47 The European respiratory journal. 2020.  
48
- 49 73. Tanu S, Sourabh P, Sunil P, Amit R. Hyperpyrexia leading to death in a patient with  
50 severe COVID-19 disease. medRxiv. 2020.  
51
- 52 74. Team C-I. Clinical and virologic characteristics of the first 12 patients with coronavirus  
53 disease 2019 (COVID-19) in the United States. Nature medicine. 2020.  
54  
55  
56  
57  
58  
59  
60

- 1  
2  
3 75. Tejada Meza H, Lambea A, Sancho Saldana A, Martinez-Zabaleta MT, de la Riva P, Lopez-Cancio E, et al. EXPRESS: Impact of COVID-19 outbreak in ischemic stroke admissions and in-hospital mortality in North-West Spain. *International journal of stroke : official journal of the International Stroke Society*. 2020:1747493020938301.
- 8 76. Topaktaş R, Tokuç E, Ali Kutluhan M, Akyüz M, Karabay E, Çalışkan S. Clinical features and outcomes of COVID-19 patients with benign prostatic hyperplasia in ageing male: A retrospective study of 18 cases. *Int J Clin Pract*. 2020:e13574.
- 12 77. Topaktas R, Tokuc E, Kutluhan MA, Akyuz M, Karabay E, Caliskan S. Clinical features and outcomes of COVID-19 patients with benign prostatic hyperplasia in aging male: A retrospective study of 18 cases. *International journal of clinical practice*. 2020:e13574.
- 17 78. Travi G, Rossotti R, Merli M, Sacco A, Perricone G, Lauterio A, et al. Clinical outcome in solid organ transplant recipients with COVID-19: A single-center experience. *American journal of transplantation : official journal of the American Society of Transplantation and the American Society of Transplant Surgeons*. 2020.
- 22 79. Trujillo H, Caravaca-Fontan F, Sevillano A, Gutierrez E, Caro J, Gutierrez E, et al. SARS-CoV-2 Infection in Hospitalized Patients with Kidney Disease. *Kidney international reports*. 2020.
- 26 80. Valeri AM, Robbins-Juarez SY, Stevens JS, Ahn W, Rao MK, Radhakrishnan J, et al. Presentation and Outcomes of Patients with ESKD and COVID-19. *Journal of the American Society of Nephrology : JASN*. 2020.
- 30 81. Verdoni L, Mazza A, Gervasoni A, Martelli L, Ruggeri M, Ciuffreda M, et al. An outbreak of severe Kawasaki-like disease at the Italian epicentre of the SARS-CoV-2 epidemic: an observational cohort study. *Lancet*. 2020;395(10239):1771-8.
- 34 82. Vizcarra P, Perez-Elias MJ, Quereda C, Moreno A, Vivancos MJ, Dronda F, et al. Description of COVID-19 in HIV-infected individuals: a single-centre, prospective cohort. *The lancet HIV*. 2020.
- 38 83. Webb GJ, Moon AM, Barnes E, Barritt AS, Marjot T. Determining risk factors for mortality in liver transplant patients with COVID-19. *The lancet Gastroenterology & hepatology*. 2020.
- 42 84. Whittaker E, Bamford A, Kenny J, Kaforou M, Jones CE, Shah P, et al. Clinical Characteristics of 58 Children With a Pediatric Inflammatory Multisystem Syndrome Temporarily Associated With SARS-CoV-2. *JAMA*. 2020.
- 46 85. Yaghi S, Ishida K, Torres J, Mac Grory B, Raz E, Humbert K, et al. SARS-CoV-2 and Stroke in a New York Healthcare System. *Stroke*. 2020;51(7):2002-11.
- 50 86. Yamada T, Mikami T, Chopra N, Miyashita H, Chernyavsky S, Miyashita S. Patients with chronic kidney disease have a poorer prognosis of coronavirus disease 2019 (COVID-19): an experience in New York City. *International urology and nephrology*. 2020.
- 54 87. Zen M, Fuzzi E, Astorri D, Saccon F, Padoan R, Ienna L, et al. SARS-CoV-2 infection in patients with autoimmune rheumatic diseases in northeast Italy: A cross-sectional study on 916 patients. *Journal of autoimmunity*. 2020:102502.



**Excluded – country (n=240)**

1. Collaborative C. Mortality and pulmonary complications in patients undergoing surgery with perioperative SARS-CoV-2 infection: an international cohort study. *Lancet* (London, England). 2020.
2. Du H, Dong X, Zhang J-J, Cao Y-Y, Akdis M, Huang P-Q, et al. Clinical characteristics of 182 pediatric COVID-19 patients with different severities and allergic status. *Allergy*. 2020.
3. Fan J, Wang H, Ye G, Cao X, Xu X, Tan W, et al. Letter to the Editor: Low-density lipoprotein is a potential predictor of poor prognosis in patients with coronavirus disease 2019. *Metabolism: clinical and experimental*. 2020;107:154243.
4. Gao F, Zheng KI, Wang X-B, Sun Q-F, Pan K-H, Wang T-Y, et al. Obesity Is a Risk Factor for Greater COVID-19 Severity. *Diabetes care*. 2020.
5. Gao F, Zheng KI, Wang X-B, Yan H-D, Sun Q-F, Pan K-H, et al. Metabolic associated fatty liver disease increases coronavirus disease 2019 disease severity in nondiabetic patients. *Journal of gastroenterology and hepatology*. 2020.
6. Henry BM, de Oliveira MHS, Benoit S, Plebani M, Lippi G. Hematologic, biochemical and immune biomarker abnormalities associated with severe illness and mortality in coronavirus disease 2019 (COVID-19): a meta-analysis. *Clinical chemistry and laboratory medicine*. 2020.
7. Lagunas-Rangel FA. Neutrophil-to-lymphocyte ratio and lymphocyte-to-C-reactive protein ratio in patients with severe coronavirus disease 2019 (COVID-19): A meta-analysis. *Journal of medical virology*. 2020.
8. Lopic I, Rogic D, Plebani M. Erythrocyte sedimentation rate is associated with severe coronavirus disease 2019 (COVID-19): a pooled analysis. *Clinical chemistry and laboratory medicine*. 2020.
9. Lechien JR, Bartaire E, Bobin F, Hans S, Saussez S. The association between laryngopharyngeal reflux and COVID-19 is still not demonstrated. *Journal of medical virology*. 2020.
10. Leiva Sisniegues CE, Espeche WG, Salazar MR. Arterial hypertension and the risk of severity and mortality of COVID-19. *The European respiratory journal*. 2020;55(6).
11. Lippi G, de Oliveira MHS, Henry BM. Chronic liver disease is not associated with severity or mortality in Coronavirus disease 2019 (COVID-19): a pooled analysis. *European journal of gastroenterology & hepatology*. 2020.
12. Lippi G, Lavie CJ, Sanchis-Gomar F. Cardiac troponin I in patients with coronavirus disease 2019 (COVID-19): Evidence from a meta-analysis. *Progress in cardiovascular diseases*. 2020.
13. Lippi G, Mattiuzzi C, Sanchis-Gomar F, Henry BM. Clinical and demographic characteristics of patients dying from COVID-19 in Italy vs China. *Journal of medical virology*. 2020.

14. Liu X, Zhou H, Zhou Y, Wu X, Zhao Y, Lu Y, et al. Risk factors associated with disease severity and length of hospital stay in COVID-19 patients. *The Journal of infection*. 2020.
15. Marlais M, Wlodkowski T, Vivarelli M, Pape L, Tonshoff B, Schaefer F, et al. The severity of COVID-19 in children on immunosuppressive medication. *The Lancet Child & adolescent health*. 2020.
16. McQuaid CF, McCreesh N, Read JM, Sumner T, Houben RMGJ, White RG, et al. The potential impact of COVID-19-related disruption on tuberculosis burden. *The European respiratory journal*. 2020.
17. Mi B, Chen L, Panayi AC, Xiong Y, Liu G. Surgery in the COVID-19 pandemic: clinical characteristics and outcomes. *The British journal of surgery*. 2020.
18. Ong SWX, Young BE, Leo Y-S, Lye DC. Association of higher body mass index (BMI) with severe coronavirus disease 2019 (COVID-19) in younger patients. *Clinical infectious diseases : an official publication of the Infectious Diseases Society of America*. 2020.
19. Peng S, Huang L, Zhao B, Zhou S, Braithwaite I, Zhang N, et al. Clinical course of coronavirus disease 2019 in 11 patients after thoracic surgery and challenges in diagnosis. *The Journal of thoracic and cardiovascular surgery*. 2020.
20. Qi X, Liu Y, Wang J, Fallowfield JA, Wang J, Li X, et al. Clinical course and risk factors for mortality of COVID-19 patients with pre-existing cirrhosis: a multicentre cohort study. *Gut*. 2020.
21. Qiancheng X, Jian S, Lingling P, Lei H, Xiaogan J, Weihua L, et al. Coronavirus disease 2019 in pregnancy. *International journal of infectious diseases : IJID : official publication of the International Society for Infectious Diseases*. 2020;95:376-83.
22. Roncon L, Zuin M, Rigatelli G, Zuliani G. Diabetic patients with COVID-19 infection are at higher risk of ICU admission and poor short-term outcome. *Journal of clinical virology : the official publication of the Pan American Society for Clinical Virology*. 2020;127:104354.
23. Santoso A, Pranata R, Wibowo A, Al-Farabi MJ, Huang I, Antariksa B. Cardiac injury is associated with mortality and critically ill pneumonia in COVID-19: A meta-analysis. *The American journal of emergency medicine*. 2020.
24. Su M, Peng J, Wu M, Deng W, Yang Y, Peng YG. Two consecutive myocardial tissue insults for inpatients with COVID-19. *Critical care (London, England)*. 2020;24(1):259.
25. Tadolini M, Codecasa LR, Garcia-Garcia J-M, Blanc F-X, Borisov S, Alffenaar J-W, et al. Active tuberculosis, sequelae and COVID-19 co-infection: first cohort of 49 cases. *The European respiratory journal*. 2020.
26. Tan N-D, Qiu Y, Xing X-B, Ghosh S, Chen M-H, Mao R. Associations between Angiotensin Converting Enzyme Inhibitors and Angiotensin II Receptor Blocker Use, Gastrointestinal Symptoms, and Mortality among Patients with COVID-19. *Gastroenterology*. 2020.

- 1  
2  
3 27. Targher G, Mantovani A, Byrne CD, Wang X-B, Yan H-D, Sun Q-F, et al. Risk of severe  
4 illness from COVID-19 in patients with metabolic dysfunction-associated fatty liver disease and  
5 increased fibrosis scores. *Gut*. 2020.
- 6  
7 28. Targher G, Mantovani A, Wang XB, Yan HD, Sun QF, Pan KH, et al. Patients with  
8 diabetes are at higher risk for severe illness from COVID-19. *Diabetes & metabolism*. 2020.
- 9  
10 29. Tian S, Liu H, Liao M, Wu Y, Yang C, Cai Y, et al. Analysis of Mortality in Patients With  
11 COVID-19: Clinical and Laboratory Parameters. *Open forum infectious diseases*.  
12 2020;7(5):ofaa152.
- 13  
14 30. Wei X, Zeng W, Su J, Wan H, Yu X, Cao X, et al. Hypolipidemia is associated with the  
15 severity of COVID-19. *Journal of clinical lipidology*. 2020;14(3):297-304.
- 16  
17 31. Xiong X-L, Wong KK-Y, Chi S-Q, Zhou A-F, Tang J-Q, Zhou L-S, et al. Comparative  
18 study of the clinical characteristics and epidemiological trend of 244 COVID-19 infected children  
19 with or without GI symptoms. *Gut*. 2020.
- 20  
21 32. Yao Q, Wang P, Wang X, Qie G, Meng M, Tong X, et al. A retrospective study of risk  
22 factors for severe acute respiratory syndrome coronavirus 2 infections in hospitalized adult  
23 patients. *Polish archives of internal medicine*. 2020;130(5):390-9.
- 24  
25 33. Zheng Z, Peng F, Xu B, Zhao J, Liu H, Peng J, et al. Risk factors of critical & mortal  
26 COVID-19 cases: A systematic literature review and meta-analysis. *The Journal of infection*.  
27 2020.
- 28  
29 34. Zhou Y-J, Zheng KI, Wang X-B, Yan H-D, Sun Q-F, Pan K-H, et al. Younger patients  
30 with MAFLD are at increased risk of severe COVID-19 illness: A multicenter preliminary  
31 analysis. *Journal of hepatology*. 2020.
- 32  
33 35. Zuin M, Rigatelli G, Zuliani G, Rigatelli A, Mazza A, Roncon L. Arterial hypertension and  
34 risk of death in patients with COVID-19 infection: Systematic review and meta-analysis. *The*  
35 *Journal of infection*. 2020.
- 36  
37 36. Screening and identification of peripheral blood biomarkers in patients with COVID-19  
38 infection based on multiomics studies. *Chinese Clinical Trial Registry*. 2020.
- 39  
40 37. Prognosis Investigation and Intervention Study on Patients with novel coronavirus  
41 pneumonia (COVID-19) in recovery period Based on Community Health Management. *Chinese*  
42 *Clinical Trial Registry*. 2020.
- 43  
44 38. A medical records based analysis for the clinical characteristics of novel coronavirus  
45 pneumonia (COVID-19) in immunocompromised patients. *Chinese Clinical Trial Registry*. 2020.
- 46  
47 39. Correlation analysis of blood eosinophil cell levels and clinical type category of novel  
48 coronavirus pneumonia (COVID-19): a medical records based retrospective study. *Chinese*  
49 *Clinical Trial Registry*. 2020.
- 50  
51 40. A medical records based study for epidemic and clinical features of novel coronavirus  
52 pneumonia (COVID-19) in Ningbo First Hospital. *Chinese Clinical Trial Registry*. 2020.
- 53  
54  
55  
56  
57  
58  
59  
60

- 1  
2  
3 41. Correlation of T lymphocytes level and clinical severity in novel coronavirus pneumonia  
4 (COVID-19) patients: a medical records based retrospective study. Chinese Clinical Trial  
5 Registry. 2020.  
6
- 7 42. A medical records based retrospective study for analysis clinical characteristics and risk  
8 factors of death in patients with novel coronavirus pneumonia (COVID-19). Chinese Clinical  
9 Trial Registry. 2020.  
10
- 11 43. A Medical Records Based Retrospective Study for Clinical Characteristics, Treatments  
12 and Prognosis of Patients with Novel Coronavirus Pneumonia (COVID-19) in WuHan. Chinese  
13 Clinical Trial Registry. 2020.  
14
- 15 44. A medical records based study for clinical characteristics of 2019 novel coronavirus  
16 pneumonia (COVID-19) in Zhejiang province, China. Chinese Clinical Trial Registry. 2020.  
17
- 18 45. Clinical and CT imaging Characteristics of novel coronavirus pneumonia (COVID-19): An  
19 Multicenter Cohort Study. Chinese Clinical Trial Registry. 2020.  
20
- 21 46. A medical records based study for clinical characteristics of novel coronavirus  
22 pneumonia (COVID-19). Chinese Clinical Trial Registry. 2020.  
23
- 24 47. A medical records based study for the value of Lymphocyte subsets in the diagnose and  
25 treatment of novel coronavirus pneumonia (COVID-19). Chinese Clinical Trial Registry. 2020.  
26
- 27 48. A medical records based analysis of the Incidence and Risk Factors of Ventilator-  
28 associated Pneumonia in ARDS Patients with Novel Coronavirus Pneumonia (COVID-19).  
29 Chinese Clinical Trial Registry. 2020.  
30
- 31 49. Correlation between virological negative conversion and clinical factors and prognosis in  
32 patients with novel coronavirus pneumonia (COVID-19). Chinese Clinical Trial Registry. 2020.  
33
- 34 50. Clinical characteristics and prognosis of cancer patients with novel coronavirus  
35 pneumonia (COVID-19). Chinese Clinical Trial Registry. 2020.  
36
- 37 51. Construction of Early Warning and Prediction System for Patients with Severe / Critical  
38 Novel Coronavirus Pneumonia (COVID-19). Chinese Clinical Trial Registry. 2020.  
39
- 40 52. Study for the physical and mental health status of medical workers under the novel  
41 coronavirus pneumonia (COVID-19) epidemic. Chinese Clinical Trial Registry. 2020.  
42
- 43 53. Construction of a Bio information platform for novel coronavirus pneumonia (COVID-19)  
44 patients follow-up in Anhui. Chinese Clinical Trial Registry. 2020.  
45
- 46 54. A Medical Records Based Retrospective Study for Clinical Characteristics of severe  
47 Novel Coronavirus Pneumonia (COVID-19). Chinese Clinical Trial Registry. 2020.  
48
- 49 55. Analysis of risk factors affecting prognosis of elderly patients infected with novel  
50 coronavirus pneumonia (COVID-19): a single-center retrospective observational study. Chinese  
51 Clinical Trial Registry. 2020.  
52
- 53 56. Factors associated with death in patients with novel coronavirus pneumonia (COVID-  
54 19). Chinese Clinical Trial Registry. 2020.  
55  
56  
57  
58  
59  
60

- 1  
2  
3 57. To explore the pathogenesis and course prediction of novel coronavirus pneumonia  
4 (COVID-19) severe patients. Chinese Clinical Trial Registry. 2020.  
5
- 6 58. A Medical Records Based analysis for Risk Factors for Outcomes After Respiratory  
7 Support in Patients with ARDS Due to Novel Coronavirus Pneumonia (COVID-19). Chinese  
8 Clinical Trial Registry. 2020.  
9
- 10 59. A medical records based study for clinical characteristics and risk factors of novel  
11 coronavirus pneumonia (COVID-19). Chinese Clinical Trial Registry. 2020.  
12
- 13 60. Novel Coronavirus Infected Disease (COVID-19) in children: epidemiology, clinical  
14 features and treatment outcome. Chinese Clinical Trial Registry. 2020.  
15
- 16 61. A medical records based study for optimization and evaluation of the comprehensive  
17 diagnosis and treatment of novel coronavirus pneumonia (COVID-19) and the assessment of  
18 risk factors for severe pneumonia. Chinese Clinical Trial Registry. 2020.  
19
- 20 62. A medical records based study for clinical features of novel coronavirus pneumonia  
21 (COVID-19) patients and risk factors of death. Chinese Clinical Trial Registry. 2020.  
22
- 23 63. A medical records based analysis for risk factors for death in patients with Novel  
24 Coronavirus Pneumonia (COVID-19). Chinese Clinical Trial Registry. 2020.  
25
- 26 64. Risk Factors for Outcomes of Novel Coronavirus Pneumonia (COVID-19). Chinese  
27 Clinical Trial Registry. 2020.  
28
- 29 65. Analysis of the incidence and risk factors of ARDS in patients with Novel Coronavirus  
30 Pneumonia (COVID-19). Chinese Clinical Trial Registry. 2020.  
31
- 32 66. The treatment status and risk factors related to prognosis of hospitalized patients with  
33 novel coronavirus pneumonia (COVID-19) in intensive care unit, Hebei, China: a descriptive  
34 study. Chinese Clinical Trial Registry. 2020.  
35
- 36 67. Delineate the prevalence, risk factors, temporal distribution and epidemiological  
37 characteristics of hidden novel coronavirus (2019-nCoV) infection in the community. Chinese  
38 Clinical Trial Registry. 2020.  
39
- 40 68. A correlation study between food intake and risk factors of PTSD after the COVID-19 of  
41 shift medical staff. Chinese Clinical Trial Registry. 2020.  
42
- 43 69. Clinical characteristics and risk factors of novel coronavirus pneumonia (COVID-19)  
44 patients with chronic liver disease. Chinese Clinical Trial Registry. 2020.  
45
- 46 70. Study for the risk factors of critically ill patients with novel coronavirus pneumonia  
47 (COVID-19). Chinese Clinical Trial Registry. 2020.  
48
- 49 71. Bai X. A medical records based retrospective analysis of maternal and infant outcomes  
50 in Cesarean delivery in Hangzhou non pneumonia Hospital during pandemic of Novel  
51 coronavirus pneumonia(COVID-19). Chinese Clinical Trial Registry. 2020.  
52
- 53 72. Bai Y, Yao L, Wei T, Tian F, Jin DY, Chen L, et al. Presumed Asymptomatic Carrier  
54 Transmission of COVID-19. JAMA. 2020;323(14):1406-7.  
55  
56  
57  
58  
59  
60

- 1  
2  
3 73. Beijing Children's H. Clinical Characteristics and Long-term Prognosis of 2019-nCoV  
4 Infection in Children. *clinicaltrials.gov*. 2020.  
5
- 6 74. Bo W, Jiangtao L, Shihua F, Xiaocheng X, Lanyu L, Yueling M, et al. An effect  
7 assessment of Airborne particulate matter pollution on COVID-19: A multi-city Study in China.  
8 *medRxiv*. 2020.  
9
- 10 75. Cai Q, Huang D, Ou P, Yu H, Zhu Z, Xia Z, et al. COVID-19 in a Designated Infectious  
11 Diseases Hospital Outside Hubei Province, China. *Allergy*. 2020.  
12
- 13 76. Cao C, Li Y, Liu S, Fan H, Hao L. Epidemiological Features of 135 Patients with  
14 Coronavirus Disease (COVID-19) in Tianjin, China. *Disaster medicine and public health*  
15 *preparedness*. 2020:1-9.  
16
- 17 77. Cao M, Zhang D, Wang Y, Lu Y, Zhu X, Li Y, et al. Clinical Features of Patients Infected  
18 with the 2019 Novel Coronavirus (COVID-19) in Shanghai, China. *medRxiv : the preprint server*  
19 *for health sciences*. 2020.  
20
- 21 78. Cao W, Fang Z, Hou G, Han M, Xu X, Dong J, et al. The psychological impact of the  
22 COVID-19 epidemic on college students in China. *Psychiatry research*. 2020;287:112934.  
23
- 24 79. Che Z, Jiaowei G, Quanjing C, Na D, Jingfeng L, Li H, et al. Clinical Characteristics of 34  
25 Children with Coronavirus Disease-2019 in the West of China: a Multiple-center Case Series.  
26 *medRxiv*. 2020.  
27
- 28 80. Chen H, Guo J, Wang C, Luo F, Yu X, Zhang W, et al. Clinical characteristics and  
29 intrauterine vertical transmission potential of COVID-19 infection in nine pregnant women: a  
30 retrospective review of medical records. *Lancet (London, England)*. 2020;395(10226):809-15.  
31
- 32 81. Chen J, Qi T, Liu L, Ling Y, Qian Z, Li T, et al. Clinical progression of patients with  
33 COVID-19 in Shanghai, China. *The Journal of infection*. 2020;80(5):e1-e6.  
34
- 35 82. Chen JI, Hua F, Lin Z, Bin H, Muxin Z, Yong Z, et al. Retrospective Analysis of Clinical  
36 Features in 101 Death Cases with COVID-19. *medRxiv*. 2020.  
37
- 38 83. Chen L, Li Q, Zheng D, Jiang H, Wei Y, Zou L, et al. Clinical Characteristics of Pregnant  
39 Women with Covid-19 in Wuhan, China. *The New England journal of medicine*. 2020.  
40
- 41 84. Chen M, Fan Y, Wu X, Zhang L, Guo T, Deng K, et al. Clinical Characteristics And Risk  
42 Factors For Fatal Outcome in Patients With 2019-Coronavirus Infected Disease (COVID-19) in  
43 Wuhan, China. *SSRN*. 2020.  
44
- 45 85. Chen N, Zhou M, Dong X, Qu J, Gong F, Han Y, et al. Epidemiological and clinical  
46 characteristics of 99 cases of 2019 novel coronavirus pneumonia in Wuhan, China: a  
47 descriptive study. *Lancet (London, England)*. 2020;395(10223):507-13.  
48
- 49 86. Chen R, Liang W, Jiang M, Guan W, Zhan C, Wang T, et al. Risk factors of fatal  
50 outcome in hospitalized subjects with coronavirus disease 2019 from a nationwide analysis in  
51 China. *Chest*. 2020.  
52
- 53 87. Chen S, Huang B, Luo DJ, Li X, Yang F, Zhao Y, et al. [Pregnant women with new  
54 coronavirus infection: a clinical characteristics and placental pathological analysis of three  
55 cases]. *Zhonghua bing li xue za zhi = Chinese journal of pathology*. 2020;49(0):E005.  
56  
57  
58  
59  
60

- 1  
2  
3 88. Chen S, Liao E, Shao Y. Clinical analysis of pregnant women with 2019 novel  
4 coronavirus pneumonia. *Journal of medical virology*. 2020.  
5
- 6 89. Chen T, Dai Z, Mo P, Li X, Ma Z, Song S, et al. Clinical characteristics and outcomes of  
7 older patients with coronavirus disease 2019 (COVID-19) in Wuhan, China (2019): a single-  
8 centered, retrospective study. *The journals of gerontology Series A, Biological sciences and*  
9 *medical sciences*. 2020.  
10
- 11 90. Chen X, Zhao B, Qu Y, Chen Y, Xiong J, Feng Y, et al. Detectable serum SARS-CoV-2  
12 viral load (RNAemia) is closely correlated with drastically elevated interleukin 6 (IL-6) level in  
13 critically ill COVID-19 patients. *Clinical infectious diseases : an official publication of the*  
14 *Infectious Diseases Society of America*. 2020.  
15
- 16 91. Chen Y, Peng H, Wang L, Zhao Y, Zeng L, Gao H, et al. Infants Born to Mothers With a  
17 New Coronavirus (COVID-19). *Frontiers in pediatrics*. 2020;8:104.  
18
- 19 92. Cheng Y, Luo R, Wang K, Zhang M, Wang Z, Dong L, et al. Kidney disease is  
20 associated with in-hospital death of patients with COVID-19. *Kidney International*.  
21 2020;97(5):829-38.  
22
- 23 93. Chenyun L, Yun-zhi Y, Xiao Ming Z, Xinying X, Qing-Li D, Wen-Wu Z. The prevalence  
24 and influencing factors for anxiety in medical workers fighting COVID-19 in China: A cross-  
25 sectional survey. *medRxiv*. 2020.  
26
- 27 94. Chinese University of Hong K. Coronavirus Disease 2019 (COVID-19) Study of  
28 Hospitalized Patients in Hong Kong. *clinicaltrials.gov*. 2020.  
29
- 30 95. Chongqing Medical U. Prognostic Factors of Patients With COVID-19. *clinicaltrials.gov*.  
31 2020.  
32
- 33 96. Chu J, Yang N, Wei Y, Yue H, Zhang F, Zhao J, et al. Clinical Characteristics of 54  
34 medical staff with COVID-19: A retrospective study in a single center in Wuhan, China. *Journal*  
35 *of medical virology*. 2020;92(7):807-13.  
36
- 37 97. Deng Y, Liu W, Liu K, Fang YY, Shang J, Zhou L, et al. Clinical characteristics of fatal  
38 and recovered cases of coronavirus disease 2019 (COVID-19) in Wuhan, China: a retrospective  
39 study. *Chinese medical journal*. 2020.  
40
- 41 98. Dong XC, Li JM, Bai JY, Liu ZQ, Zhou PH, Gao L, et al. [Epidemiological characteristics  
42 of confirmed COVID-19 cases in Tianjin]. *Zhonghua liu xing bing xue za zhi = Zhonghua*  
43 *liuxingbingxue zazhi*. 2020;41(5):638-42.  
44
- 45 99. Du RH, Liu LM, Yin W, Wang W, Guan LL, Yuan ML, et al. Hospitalization and Critical  
46 Care of 109 Decedents with COVID-19 Pneumonia in Wuhan, China. *Annals of the American*  
47 *Thoracic Society*. 2020.  
48
- 49 100. Du Y, Tu L, Zhu P, Mu M, Wang R, Yang P, et al. Clinical Features of 85 Fatal Cases of  
50 COVID-19 from Wuhan: A Retrospective Observational Study. *American journal of respiratory*  
51 *and critical care medicine*. 2020;201(11):1372-9.  
52  
53  
54  
55  
56  
57  
58  
59  
60

- 1  
2  
3 101. Fan C, Lei D, Fang C, Li C, Wang M, Liu Y, et al. Perinatal Transmission of COVID-19  
4 Associated SARS-CoV-2: Should We Worry? *Clinical infectious diseases : an official publication*  
5 *of the Infectious Diseases Society of America.* 2020.  
6
- 7 102. Fan Z, Deyan Y, Jing L, Peng G, Taibo C, Zhongwei C, et al. Myocardial injury is  
8 associated with in-hospital mortality of confirmed or suspected COVID-19 in Wuhan, China: A  
9 single center retrospective cohort study. *medRxiv.* 2020.  
10
- 11 103. Feng K, Yun YX, Wang XF, Yang GD, Zheng YJ, Lin CM, et al. [Analysis of CT features  
12 of 15 children with 2019 novel coronavirus infection]. *Zhonghua er ke za zhi = Chinese journal*  
13 *of pediatrics.* 2020;58(4):275-8.  
14
- 15 104. Feng Y, Ling Y, Bai T, Xie Y, Huang J, Li J, et al. COVID-19 with Different Severity: A  
16 Multi-center Study of Clinical Features. *American journal of respiratory and critical care*  
17 *medicine.* 2020;201(11):1380-8.  
18
- 19 105. Francisco C, Nuno F, Barbara O. Estimation of risk factors for COVID-19 mortality -  
20 preliminary results. *medRxiv.* 2020:2020.02.24.20027268.  
21
- 22 106. Gao L, Jiang D, Wen XS, Cheng XC, Sun M, He B, et al. Prognostic value of NT-proBNP  
23 in patients with severe COVID-19. *Respiratory research.* 2020;21(1):83.  
24
- 25 107. Gong J, Ou J, Qiu X, Jie Y, Chen Y, Yuan L, et al. A Tool to Early Predict Severe  
26 Corona Virus Disease 2019 (COVID-19) : A Multicenter Study using the Risk Nomogram in  
27 Wuhan and Guangdong, China. *Clinical infectious diseases : an official publication of the*  
28 *Infectious Diseases Society of America.* 2020.  
29
- 30 108. Guan WJ, Liang WH, Zhao Y, Liang HR, Chen ZS, Li YM, et al. Comorbidity and its  
31 impact on 1590 patients with Covid-19 in China: A Nationwide Analysis. *The European*  
32 *respiratory journal.* 2020;55(5).  
33
- 34 109. Guan WJ, Ni ZY, Hu Y, Liang WH, Ou CQ, He JX, et al. Clinical Characteristics of  
35 Coronavirus Disease 2019 in China. *The New England journal of medicine.* 2020;382(18):1708-  
36 20.  
37
- 38 110. Guang Y, Zihu T, Ling Z, Min Y, Lang P, Jinjin L, et al. Angiotensin II Receptor Blockers  
39 and Angiotensin-Converting Enzyme Inhibitors Usage is Associated with Improved Inflammatory  
40 Status and Clinical Outcomes in COVID-19 Patients With Hypertension. *medRxiv.* 2020.  
41
- 42 111. Guo W, Li M, Dong Y, Zhou H, Zhang Z, Tian C, et al. Diabetes is a risk factor for the  
43 progression and prognosis of COVID-19. *Diabetes/metabolism research and reviews.*  
44 2020:e3319.  
45
- 46 112. Han H, Xie L, Liu R, Yang J, Liu F, Wu K, et al. Analysis of heart injury laboratory  
47 parameters in 273 COVID-19 patients in one hospital in Wuhan, China. *Journal of medical*  
48 *virology.* 2020;92(7):819-23.  
49
- 50 113. Han M, Ma K, Wang X, Yan W, Wang H, You J, et al. Higher Fasting Plasma Glucose  
51 Reduced the Survival Rate of 306 Hospitalized Patients with COVID-19 in Wuhan, China.  
52 *SSRN.* 2020.  
53  
54  
55  
56  
57  
58  
59  
60



- 1  
2  
3 114. Hantoushzadeh S, Shamshirsaz AA, Aleyasin A, Seferovic MD, Aski SK, Arian SE, et al. Maternal Death Due to COVID-19 Disease. *American journal of obstetrics and gynecology*. 2020.  
4  
5  
6  
7 115. Hu H, Yao N, Qiu Y. Comparing rapid scoring systems in mortality prediction of critical ill  
8 patients with novel coronavirus disease. *Academic emergency medicine : official journal of the*  
9 *Society for Academic Emergency Medicine*. 2020.  
10  
11 116. Hu L, Chen S, Fu Y, Gao Z, Long H, Wang JM, et al. Risk Factors Associated with  
12 Clinical Outcomes in 323 COVID-19 Hospitalized Patients in Wuhan, China. *Clinical infectious*  
13 *diseases : an official publication of the Infectious Diseases Society of America*. 2020.  
14  
15 117. Hu Z, Song C, Xu C, Jin G, Chen Y, Xu X, et al. Clinical characteristics of 24  
16 asymptomatic infections with COVID-19 screened among close contacts in Nanjing, China.  
17 *Science China Life sciences*. 2020;63(5):706-11.  
18  
19 118. Huadong Y, Ana MV, Amrita V, Shanbo W, Lili L, Shiqing Y, et al. Role of Drugs  
20 Affecting the Renin-Angiotensin-Aldosterone System on Susceptibility and Severity of COVID-  
21 19: A Large Case-Control Study from Zhejiang Province, China. *medRxiv*. 2020.  
22  
23 119. Huang C, Wang Y, Li X, Ren L, Zhao J, Hu Y, et al. Clinical features of patients infected  
24 with 2019 novel coronavirus in Wuhan, China. *Lancet (London, England)*.  
25 2020;395(10223):497-506.  
26  
27 120. Huang H, Shuijiang C, Yueping L, Youxia L, Yinqiang F, Linghua L, et al. Prognostic  
28 factors for COVID-19 pneumonia progression to severe symptom based on the earlier clinical  
29 features: a retrospective analysis. *medRxiv*. 2020.  
30  
31 121. Huang Y, Tu M, Wang S, Chen S, Zhou W, Chen D, et al. Clinical characteristics of  
32 laboratory confirmed positive cases of SARS-CoV-2 infection in Wuhan, China: A retrospective  
33 single center analysis. *Travel medicine and infectious disease*. 2020:101606.  
34  
35 122. Hui H, Yingqian Z, Xin Y, Xi W, Bingxi H, Li L, et al. Clinical and radiographic features of  
36 cardiac injury in patients with 2019 novel coronavirus pneumonia. *medRxiv*. 2020.  
37  
38 123. Jia-Kui S. Acute gastrointestinal injury in critically ill patients with coronavirus disease  
39 2019 in Wuhan, China. *medRxiv*. 2020.  
40  
41 124. Jianfeng X, Daniel H, Hui C, Simon TA, Shusheng L, Guozheng W, et al. Development  
42 and external validation of a prognostic multivariable model on admission for hospitalized  
43 patients with COVID-19. *medRxiv*. 2020:2020.03.28.20045997.  
44  
45 125. Jiatao L, Shufang H, Rong F, Zhihong L, Xueru Y, Qiongya W, et al. ACP risk grade: a  
46 simple mortality index for patients with confirmed or suspected severe acute respiratory  
47 syndrome coronavirus 2 disease (COVID-19) during the early stage of outbreak in Wuhan,  
48 China. *medRxiv*. 2020:2020.02.20.20025510.  
49  
50 126. Jie L, Liu O, Pi G, Hai sheng W, Peng F, Yu liang C, et al. Epidemiological, Clinical  
51 Characteristics and Outcome of Medical Staff Infected with COVID-19 in Wuhan, China: A  
52 Retrospective Case Series Analysis. *medRxiv*. 2020:2020.03.09.20033118.  
53  
54  
55  
56  
57  
58  
59  
60

- 1  
2  
3 127. Jie L, Shilin L, Yurui C, Qin L, Xue L, Zhaoping Z, et al. Epidemiological and Clinical  
4 Characteristics of 17 Hospitalized Patients with 2019 Novel Coronavirus Infections Outside  
5 Wuhan, China. medRxiv. 2020:2020.02.11.20022053.  
6  
7 128. Jin XH, Zheng KI, Pan KH, Xie YP, Zheng MH. COVID-19 in a patient with chronic  
8 lymphocytic leukaemia. *The Lancet Haematology*. 2020;7(4):e351-e2.  
9  
10 129. Jin-Kui Y, Jian-Min J, Shi L, Peng B, Wei H, Fei W, et al. Blood glucose is a  
11 representative of the clustered indicators of multi-organ injury for predicting mortality of COVID-  
12 19 in Wuhan, China. medRxiv. 2020.  
13  
14 130. Jing G, Hui D, Song Qing X, Yi Zhao H, Dingkun W, Yan Z, et al. Correlation Analysis  
15 Between Disease Severity and Inflammation-related Parameters in Patients with COVID-19  
16 Pneumonia. medRxiv. 2020.  
17  
18 131. Kuang Y, Zhang H, Zhou R. Epidemiological and Clinical Characteristics of 944 Cases of  
19 2019 Novel Coronavirus Infection of Non-COVID-19 Exporting City, Zhejiang, China. SSRN.  
20 2020.  
21  
22 132. Ladan G, Mina Akbari R, Robert B, Abolghasem A, Team MC-R, Benyamin H.  
23 Demographic and Clinical Characteristics of the Severe Covid-19 Infections: First Report from  
24 Mashhad University of Medical Sciences, Iran. medRxiv. 2020.  
25  
26 133. Lee N-Y, Li C-W, Tsai H-P, Chen P-L, Syue L-S, Li M-C, et al. A case of COVID-19 and  
27 pneumonia returning from Macau in Taiwan: Clinical course and anti-SARS-CoV-2 IgG  
28 dynamic. *Journal of microbiology, immunology, and infection = Wei mian yu gan ran za zhi*.  
29 2020;53(3):485-7.  
30  
31 134. Lei D, Li C, Fang C, et al. Clinical characteristics of pregnancy with the 2019 novel  
32 coronavirus disease (COVID-19) infection. *Chinese Journal of Perinatal Medicine*.  
33 2020;23(3):157-63.  
34  
35 135. Lei Z, Cao H, Jie Y, Huang Z, Guo X, Chen J, et al. A cross-sectional comparison of  
36 epidemiological and clinical features of patients with coronavirus disease (COVID-19) in Wuhan  
37 and outside Wuhan, China. *Travel medicine and infectious disease*. 2020:101664.  
38  
39 136. Li H, Xiang X, Ren H, Xu L, Zhao L, Chen X, et al. SAA is a biomarker to distinguish the  
40 severity and prognosis of Coronavirus Disease 2019 (COVID-19). *The Journal of infection*.  
41 2020;80(6):646-55.  
42  
43 137. Li J, Wang X, Chen J, Zhang H, Deng A. Association of Renin-Angiotensin System  
44 Inhibitors With Severity or Risk of Death in Patients With Hypertension Hospitalized for  
45 Coronavirus Disease 2019 (COVID-19) Infection in Wuhan, China. *JAMA cardiology*. 2020.  
46  
47 138. Li N, Han L, Peng M, Lv Y, Ouyang Y, Liu K, et al. Maternal and neonatal outcomes of  
48 pregnant women with COVID-19 pneumonia: a case-control study. *Clinical infectious diseases* :  
49 an official publication of the Infectious Diseases Society of America. 2020.  
50  
51 139. Li W, Cui H, Li K, Fang Y, Li S. Chest computed tomography in children with COVID-19  
52 respiratory infection. *Pediatric radiology*. 2020;50(6):796-9.  
53  
54  
55  
56  
57  
58  
59  
60

- 1  
2  
3 140. Li X, Wu Q, Lv B. Can Search Query Forecast successfully in China's 2019-nCov  
4 pneumonia? medRxiv. 2020.  
5  
6 141. Li X, Xu S, Yu M, Wang K, Tao Y, Zhou Y, et al. Risk factors for severity and mortality in  
7 adult COVID-19 inpatients in Wuhan. *The Journal of allergy and clinical immunology*. 2020.  
8  
9 142. Li X, Zeng W, Li X, Chen H, Shi L, Li X, et al. CT imaging changes of corona virus  
10 disease 2019(COVID-19): a multi-center study in Southwest China. *Journal of translational*  
11 *medicine*. 2020;18(1):154.  
12  
13 143. Liang W, Guan W, Chen R, Wang W, Li J, Xu K, et al. Cancer patients in SARS-CoV-2  
14 infection: a nationwide analysis in China. *The Lancet Oncology*. 2020;21(3):335-7.  
15  
16 144. Liang WH, Guan WJ, Li CC, Li YM, Liang HR, Zhao Y, et al. Clinical characteristics and  
17 outcomes of hospitalised patients with COVID-19 treated in Hubei (epicenter) and outside Hubei  
18 (non-epicenter): A Nationwide Analysis of China. *The European respiratory journal*. 2020.  
19  
20 145. Liao J, He X, Gong Q, Yang L, Zhou C, Li J. Analysis of vaginal delivery outcomes  
21 among pregnant women in Wuhan, China during the COVID-19 pandemic. *International journal*  
22 *of gynaecology and obstetrics: the official organ of the International Federation of Gynaecology*  
23 *and Obstetrics*. 2020;150(1):53-7.  
24  
25 146. Liu CY, Huang LJ, Lai CH, Chen HP, Chen TL, Fung CP, et al. Clinical characteristics,  
26 management and prognostic factors in patients with probable severe acute respiratory  
27 syndrome (SARS) in a SARS center in Taiwan. *Journal of the Chinese Medical Association :*  
28 *JCMA*. 2005;68(3):110-7.  
29  
30 147. Liu H, Liu F, Li J, Zhang T, Wang D, Lan W. Clinical and CT Imaging Features of the  
31 COVID-19 Pneumonia: Focus on Pregnant Women and Children. *The Journal of infection*.  
32 2020;80(5):e7-e13.  
33  
34 148. Liu R, Han H, Liu F, Lv Z, Wu K, Liu Y, et al. Positive rate of RT-PCR detection of  
35 SARS-CoV-2 infection in 4880 cases from one hospital in Wuhan, China, from Jan to Feb 2020.  
36 *Clinica chimica acta; international journal of clinical chemistry*. 2020;505:172-5.  
37  
38 149. Liu S, Luo H, Wang Y, Wang D, Ju S, Yang Y. Characteristics and Associations with  
39 Severity in COVID-19 Patients: A Multicentre Cohort Study from Jiangsu Province, China.  
40 *SSRN*. 2020.  
41  
42 150. Liu T, Hu J, Xiao J, He G, Kang M, Rong Z, et al. Time-varying transmission dynamics of  
43 Novel Coronavirus Pneumonia in China. *bioRxiv*. 2020.  
44  
45 151. Liu W, Tao ZW, Lei W, Ming-Li Y, Kui L, Ling Z, et al. Analysis of factors associated with  
46 disease outcomes in hospitalized patients with 2019 novel coronavirus disease. *Chinese*  
47 *medical journal*. 2020;133(9):1032-8.  
48  
49 152. Liu W, Wang Q, Zhang Q, Chen L, Chen J, Zhang B, et al. Coronavirus disease 2019  
50 (COVID-19) during pregnancy: a case series. *Preprints*. 2020.  
51  
52 153. Liu W, Zhang Q, Chen J, Xiang R, Song H, Shu S, et al. Detection of Covid-19 in  
53 Children in Early January 2020 in Wuhan, China. *The New England journal of medicine*.  
54 2020;382(14):1370-1.  
55  
56  
57  
58  
59  
60

- 1  
2  
3 154. Liu Y, Du X, Chen J, Jin Y, Peng L, Wang HHX, et al. Neutrophil-to-lymphocyte ratio as  
4 an independent risk factor for mortality in hospitalized patients with COVID-19. *The Journal of*  
5 *infection*. 2020.  
6  
7 155. Liu Y, Yang Y, Zhang C, Huang F, Wang F, Yuan J, et al. Clinical and biochemical  
8 indexes from 2019-nCoV infected patients linked to viral loads and lung injury. *Science China*  
9 *Life sciences*. 2020;63(3):364-74.  
10  
11 156. Lopes RD, Macedo AVS, de Barros ESPGM, Moll-Bernardes RJ, Feldman A, D'Andréa  
12 Saba Arruda G, et al. Continuing versus suspending angiotensin-converting enzyme inhibitors  
13 and angiotensin receptor blockers: Impact on adverse outcomes in hospitalized patients with  
14 severe acute respiratory syndrome coronavirus 2 (SARS-CoV-2). *American heart journal*.  
15 2020;226:49-59.  
16  
17 157. Lu L, Xiong W, Liu D, Liu J, Yang D, Li N, et al. New-onset acute symptomatic seizure  
18 and risk factors in Corona Virus Disease 2019: A Retrospective Multicenter Study. *Epilepsia*.  
19 2020.  
20  
21 158. Luo XM, Zhou W, Xia H, Yang W, Yan X, Wang B. Characteristics of SARS-CoV-2  
22 Infected Patients with Clinical Outcome During Epidemic Ongoing Outbreak in Wuhan, China.  
23 SSRN. 2020.  
24  
25 159. Meng H, Xiong R, He R, Lin W, Hao B, Zhang L, et al. CT imaging and clinical course of  
26 asymptomatic cases with COVID-19 pneumonia at admission in Wuhan, China. *The Journal of*  
27 *infection*. 2020.  
28  
29 160. Mingzhu Y, Lijuan Z, Guangtong D, Chaofei H, Minxue S, Hongyin S, et al. Severe Acute  
30 Respiratory Syndrome Coronavirus 2 (SARS-CoV-2) Infection During Pregnancy In China: A  
31 Retrospective Cohort Study. *medRxiv*. 2020.  
32  
33 161. Mo P, Xing Y, Xiao Y, Deng L, Zhao Q, Wang H, et al. Clinical characteristics of  
34 refractory COVID-19 pneumonia in Wuhan, China. *Clinical infectious diseases : an official*  
35 *publication of the Infectious Diseases Society of America*. 2020(ciaa270).  
36  
37 162. Muhammad O, Takasar H, Mureed H, Aziz Ullah A, Dumitru B. Estimation of  
38 Transmission Potential and Severity of COVID-19 in Romania and Pakistan. *medRxiv*. 2020.  
39  
40 163. Nikpouraghdam M, Jalali Farahani A, Alishiri G, Heydari S, Ebrahimnia M, Samadinia H,  
41 et al. Epidemiological characteristics of coronavirus disease 2019 (COVID-19) patients in IRAN:  
42 A single center study. *Journal of clinical virology : the official publication of the Pan American*  
43 *Society for Clinical Virology*. 2020;127:104378.  
44  
45 164. Novel Coronavirus Pneumonia Emergency Response Epidemiology T. [The  
46 epidemiological characteristics of an outbreak of 2019 novel coronavirus diseases (COVID-19)  
47 in China]. *Zhonghua liu xing bing xue za zhi = Zhonghua liuxingbingxue zazhi*. 2020;41(2):145-  
48 51.  
49  
50 165. Pan Y, Guan H, Zhou S, Wang Y, Li Q, Zhu T, et al. Initial CT findings and temporal  
51 changes in patients with the novel coronavirus pneumonia (2019-nCoV): a study of 63 patients  
52 in Wuhan, China. *European radiology*. 2020;30(6):3306-9.  
53  
54  
55  
56  
57  
58  
59  
60

- 1  
2  
3 166. Peng YD, Meng K, Guan HQ, Leng L, Zhu RR, Wang BY, et al. [Clinical characteristics  
4 and outcomes of 112 cardiovascular disease patients infected by 2019-nCoV]. *Zhonghua xin*  
5 *xue guan bing za zhi*. 2020;48(0):E004.  
6
- 7 167. Qian GQ, Yang NB, Ding F, Ma AHY, Wang ZY, Shen YF, et al. Epidemiologic and  
8 Clinical Characteristics of 91 Hospitalized Patients with COVID-19 in Zhejiang, China: A  
9 retrospective, multi-centre case series. *QJM : monthly journal of the Association of Physicians*.  
10 2020.  
11
- 12 168. Qiao S, Kailiang Z, Jia Y, Jiarui F, Kaiping Z, Xiaoyi Z, et al. Clinical characteristics of  
13 101 non-surviving hospitalized patients with COVID-19: A single center, retrospective study.  
14 *medRxiv*. 2020.  
15
- 16 169. Qin C, Zhou L, Hu Z, Zhang S, Yang S, Tao Y, et al. Dysregulation of immune response  
17 in patients with COVID-19 in Wuhan, China. *Clinical infectious diseases : an official publication*  
18 *of the Infectious Diseases Society of America*. 2020(ciaa248).  
19
- 20 170. Qiu H, Wu J, Hong L, Luo Y, Song Q, Chen D. Clinical and epidemiological features of  
21 36 children with coronavirus disease 2019 (COVID-19) in Zhejiang, China: an observational  
22 cohort study. *The Lancet Infectious diseases*. 2020;20(6):689-96.  
23
- 24 171. Ran L, Chen X, Wang Y, Wu W, Zhang L, Tan X. Risk Factors of Healthcare Workers  
25 with Corona Virus Disease 2019: A Retrospective Cohort Study in a Designated Hospital of  
26 Wuhan in China. *Clinical infectious diseases : an official publication of the Infectious Diseases*  
27 *Society of America*. 2020.  
28
- 29 172. Ren LL, Wang YM, Wu ZQ, Xiang ZC, Guo L, Xu T, et al. Identification of a novel  
30 coronavirus causing severe pneumonia in human: a descriptive study. *Chinese medical journal*.  
31 2020;133(9):1015-24.  
32
- 33 173. Ruan Q, Yang K, Wang W, Jiang L, Song J. Clinical predictors of mortality due to  
34 COVID-19 based on an analysis of data of 150 patients from Wuhan, China. *Intensive care*  
35 *medicine*. 2020;46(5):846-8.  
36
- 37 174. Rui N, Shao-shuai W, Qiong Y, Cui-fang F, Yu-ling L, Wen-cong H, et al. Clinical  
38 features and the maternal and neonatal outcomes of pregnant women with coronavirus disease  
39 2019. *medRxiv*. 2020.  
40
- 41 175. Shang J, Du R, Lu Q, Wu J, Xu S, Ke Z, et al. The Treatment and Outcomes of Patients  
42 with COVID-19 in Hubei, China: A Multi-Centered, Retrospective, Observational Study. *SSRN*.  
43 2020.  
44
- 45 176. Shen Q, Guo W, Guo T, Li J, He W, Ni S, et al. Novel coronavirus infection in children  
46 outside of Wuhan, China. *Pediatric pulmonology*. 2020;55(6):1424-9.  
47
- 48 177. Shen X, Lin F, Jun F, Hui-Xian X, Ying X, Zhu-Xia T, et al. Acute kidney injury at early  
49 stage as a negative prognostic indicator of patients with COVID-19: a hospital-based  
50 retrospective analysis. *medRxiv*. 2020.  
51
- 52 178. Shi H, Han X, Jiang N, Cao Y, Alwalid O, Gu J, et al. Radiological findings from 81  
53 patients with COVID-19 pneumonia in Wuhan, China: a descriptive study. *The Lancet Infectious*  
54 *diseases*. 2020;20(4):425-34.  
55  
56  
57  
58  
59  
60

- 1  
2  
3 179. Shi S, Qin M, Shen B, Cai Y, Liu T, Yang F, et al. Association of Cardiac Injury With  
4 Mortality in Hospitalized Patients With COVID-19 in Wuhan, China. *JAMA cardiology*. 2020.  
5
- 6 180. Su L, Ma X, Yu H, Zhang Z, Bian P, Han Y, et al. The different clinical characteristics of  
7 corona virus disease cases between children and their families in China - the character of  
8 children with COVID-19. *Emerging microbes & infections*. 2020;9(1):707-13.  
9
- 10 181. Sun F KHWS, et al. Medication Patterns and Disease Progression Among 165 Patients  
11 with Coronavirus Disease 2019 (COVID-19) in Wuhan, China: A Single-Centered,  
12 Retrospective, Observational Study. 2020.  
13
- 14 182. Sun X, Wang J, Liu Z, Zhou X, Yan Xw, Li T. Characteristics of Patients with COVID-19  
15 Pneumonia Admitted to the Intensive Care Unit and Predictors of Mortality in Wuhan, China: A  
16 Single-Centered Retrospective Cohort Study. *SSRN*. 2020.  
17
- 18 183. Sun Y, Koh V, Marimuthu K, Ng OT, Young B, Vasoo S, et al. Epidemiological and  
19 Clinical Predictors of COVID-19. *Clinical infectious diseases : an official publication of the*  
20 *Infectious Diseases Society of America*. 2020.  
21
- 22 184. Suochen T, Zhenqin C, Yunxia W, Min W, Wenming Z, Guijie Z, et al. Clinical  
23 characteristics and reasons of different duration from onset to release from quarantine for  
24 patients with COVID-19 Outside Hubei province, China. *medRxiv*. 2020.  
25
- 26 185. Taghizadieh A, Mikaeili H, Ahmadi M, Valizadeh H. Acute kidney injury in pregnant  
27 women following SARS-CoV-2 infection: A case report from Iran. *Respiratory medicine case*  
28 *reports*. 2020;30:101090.  
29
- 30 186. Tian S, Hu N, Lou J, Chen K, Kang X, Xiang Z, et al. Characteristics of COVID-19  
31 infection in Beijing. *The Journal of infection*. 2020;80(4):401-6.  
32
- 33 187. Ting D, Jinjin Z, Tian W, Pengfei C, Zhe C, Jingjing J, et al. A Multi-hospital Study in  
34 Wuhan, China : Protective Effects of Non-menopause and Female Hormones on SARS-CoV-2  
35 infection. *medRxiv*. 2020.  
36
- 37 188. Tong ZD, Tang A, Li KF, Li P, Wang HL, Yi JP, et al. Potential Presymptomatic  
38 Transmission of SARS-CoV-2, Zhejiang Province, China, 2020. *Emerging infectious diseases*.  
39 2020;26(5):1052-4.  
40
- 41 189. University of M-C. COVID-19 in Patients With HIV. *clinicaltrials.gov*. 2020.  
42
- 43 190. Wang D, Hu B, Hu C, Zhu F, Liu X, Zhang J, et al. Clinical Characteristics of 138  
44 Hospitalized Patients With 2019 Novel Coronavirus-Infected Pneumonia in Wuhan, China.  
45 *JAMA*. 2020;323(11):1061-9.  
46
- 47 191. Wang D, Ju XL, Xie F, Lu Y, Li FY, Huang HH, et al. [Clinical analysis of 31 cases of  
48 2019 novel coronavirus infection in children from six provinces (autonomous region) of northern  
49 China]. *Zhonghua er ke za zhi = Chinese journal of pediatrics*. 2020;58(4):E011.  
50
- 51 192. Wang K, Zuo PY, Liu Y, Zhang M, Zhao X, Xie S, et al. Clinical and Laboratory  
52 Predictors of In-Hospital Mortality in 305 Patients with COVID-19: A Cohort Study in Wuhan,  
53 China. *SSRN*. 2020.  
54  
55  
56  
57  
58  
59  
60

- 1  
2  
3 193. Wang L, He W, Yu X, Hu D, Bao M, Liu H, et al. Coronavirus Disease 2019 in elderly  
4 patients: characteristics and prognostic factors based on 4-week follow-up. *The Journal of*  
5 *infection*. 2020;80(6):639-45.  
6  
7 194. Wang L, Li X, Chen H, Yan S, Li D, Li Y, et al. Coronavirus Disease 19 Infection Does  
8 Not Result in Acute Kidney Injury: An Analysis of 116 Hospitalized Patients from Wuhan, China.  
9 *American journal of nephrology*. 2020;51(5):1-6.  
10  
11 195. Wang R, Pan M, Zhang X, Fan X, Han M, Zhao F, et al. Epidemiological and clinical  
12 features of 125 Hospitalized Patients with COVID-19 in Fuyang, Anhui, China. *International*  
13 *journal of infectious diseases : IJID : official publication of the International Society for Infectious*  
14 *Diseases*. 2020;95:421-8.  
15  
16 196. Wang S, Guo L, Chen L, Liu W, Cao Y, Zhang J, et al. A case report of neonatal COVID-  
17 19 infection in China. *Clinical infectious diseases : an official publication of the Infectious*  
18 *Diseases Society of America*. 2020.  
19  
20 197. Wang Y, Liu Y, Liu L, Wang X, Luo N, Ling L. Clinical outcome of 55 asymptomatic  
21 cases at the time of hospital admission infected with SARS-Coronavirus-2 in Shenzhen, China.  
22 *The Journal of infectious diseases*. 2020;221(11):1770-4.  
23  
24 198. Wang Z, Yang B, Li Q, Wen L, Zhang R. Clinical Features of 69 Cases with Coronavirus  
25 Disease 2019 in Wuhan, China. *Clinical infectious diseases : an official publication of the*  
26 *Infectious Diseases Society of America*. 2020(ciaa272).  
27  
28 199. Wei YY, Wang RR, Zhang DW, Tu YH, Chen CS, Ji S, et al. Risk factors for severe  
29 COVID-19: evidence from 167 hospitalized patients in Anhui, China. *The Journal of infection*.  
30 2020.  
31  
32 200. Wen R, Sun Y, Xing Q-S. A patient with SARS-CoV-2 infection during pregnancy in  
33 Qingdao, China. *Journal of Microbiology, Immunology and Infection*. 2020.  
34  
35 201. Wu C, Chen X, Cai Y, Xia J, Zhou X, Xu S, et al. Risk Factors Associated With Acute  
36 Respiratory Distress Syndrome and Death in Patients With Coronavirus Disease 2019  
37 Pneumonia in Wuhan, China. *JAMA internal medicine*. 2020.  
38  
39 202. Wu JT, Leung K, Bushman M, Kishore N, Niehus R, de Salazar PM, et al. Estimating  
40 clinical severity of COVID-19 from the transmission dynamics in Wuhan, China. *Nature*  
41 *medicine*. 2020;26(4):506-10.  
42  
43 203. Wu W, Wang J, Liu P, Chen W, Yin S, Jiang S, et al. A hospital outbreak of severe acute  
44 respiratory syndrome in Guangzhou, China. *Chinese medical journal*. 2003;116(6):811-8.  
45  
46 204. Xia W, Shao J, Guo Y, Peng X, Li Z, Hu D. Clinical and CT features in pediatric patients  
47 with COVID-19 infection: Different points from adults. *Pediatric pulmonology*. 2020;55(5):1169-  
48 74.  
49  
50 205. Xianfei Z, Hongyan F, Dongxue L, Fang H, Xi M, Zhuo L, et al. Association between  
51 ABO blood groups and clinical outcome of coronavirus disease 2019: Evidence from two  
52 cohorts. *medRxiv*. 2020.  
53  
54  
55  
56  
57  
58  
59  
60

- 1  
2  
3 206. Xiao K, Shui L, Pang X, et al. The clinical features of the 143 patients with COVID-19 in  
4 North-East of Chongqing. *第三军医大学学报 (Journal of Third Military Medical University)*.  
5 2020;6:549-54.  
6  
7  
8 207. Xiufeng J, Jianxin T, Hui W, Yixin W, Wei Z, Min Z, et al. Clinical features and  
9 management of severe COVID-19: A retrospective study in Wuxi, Jiangsu Province, China.  
10 medRxiv. 2020.  
11  
12 208. Xu C, Fang Z, Yanhua Q, Shuizi D, Danhui Y, Cheng L, et al. Epidemiological and  
13 clinical features of 291 cases with coronavirus disease 2019 in areas adjacent to Hubei, China:  
14 a double-center observational study. medRxiv. 2020:2020.03.03.20030353.  
15  
16 209. Xu H, Yan C, Fu Q, Xiao K, Yu Y, Han D, et al. Possible environmental effects on the  
17 spread of COVID-19 in China. *The Science of the total environment*. 2020;731:139211.  
18  
19 210. Xun L, Luwen W, Shaonan Y, Fan Y, Longkui X, Jiling Z, et al. Clinical characteristics of  
20 25 death cases infected with COVID-19 pneumonia: a retrospective review of medical records in  
21 a single medical center, Wuhan, China. medRxiv. 2020.  
22  
23 211. Yafei W, Ying Z, Zhen Y, Dongping X, Shuang G. Clinical Characteristics of Patients  
24 with Severe Pneumonia Caused by the 2019 Novel Coronavirus in Wuhan, China. medRxiv.  
25 2020.  
26  
27 212. Yang W, Cao Q, Qin L, Wang X, Cheng Z, Pan A, et al. Clinical characteristics and  
28 imaging manifestations of the 2019 novel coronavirus disease (COVID-19):A multi-center study  
29 in Wenzhou city, Zhejiang, China. *The Journal of infection*. 2020;80(4):388-93.  
30  
31 213. Yang X, Yu Y, Xu J, Shu H, Xia J, Liu H, et al. Clinical course and outcomes of critically  
32 ill patients with SARS-CoV-2 pneumonia in Wuhan, China: a single-centered, retrospective,  
33 observational study. *The Lancet Respiratory medicine*. 2020;8(5):475-81.  
34  
35 214. Yao Q, Wang P, Wang X, Qie G, Meng M, Tong X, et al. Retrospective study of risk  
36 factors for severe SARS-Cov-2 infections in hospitalized adult patients. *Polish archives of*  
37 *internal medicine*. 2020;130(5):390-9.  
38  
39 215. Yao T, Gao Y, Cui Q, Shen J, Peng B, Chen Y, et al. Clinical Characteristics of 55  
40 Cases of Deaths with COVID-19 Pneumonia in Wuhan, China: Retrospective Case Series.  
41 SSRN. 2020.  
42  
43 216. Yi H, Haidong Z, Sucheng M, Wei W, Chaoyuan J, Yuan X, et al. Lactate  
44 dehydrogenase, a Risk Factor of Severe COVID-19 Patients. medRxiv. 2020.  
45  
46 217. Yin Y, Zhou S, Zhang X, Li Z, Liu X, Jiang C. Critically Ill Patients with COVID-19 in  
47 China: A Multicenter Retrospective Observational Study. SSRN. 2020.  
48  
49 218. Yu N, Li W, Kang Q, Xiong Z, Wang S, Lin X, et al. Clinical features and obstetric and  
50 neonatal outcomes of pregnant patients with COVID-19 in Wuhan, China: a retrospective,  
51 single-centre, descriptive study. *The Lancet Infectious diseases*. 2020;20(5):559-64.  
52  
53 219. Yuan M, Yin W, Tao Z, Tan W, Hu Y. Association of radiologic findings with mortality of  
54 patients infected with 2019 novel coronavirus in Wuhan, China. *PloS one*.  
55 2020;15(3):e0230548.  
56  
57  
58  
59  
60



- 1  
2  
3 220. Zamaniyan M, Ebadi A, Aghajanpoor Mir S, Rahmani Z, Haghshenas M, Azizi S.  
4 Preterm delivery in pregnant woman with critical COVID-19 pneumonia and vertical  
5 transmission. *Prenatal diagnosis*. 2020.  
6
- 7 221. Zareie B, Roshani A, Mansournia MA, Rasouli MA, Moradi G. A Model for COVID-19  
8 Prediction in Iran Based on China Parameters. *Archives of Iranian medicine*. 2020;23(4):244-8.  
9
- 10 222. Zeng L, Xia S, Yuan W, Yan K, Xiao F, Shao J, et al. Neonatal Early-Onset Infection  
11 With SARS-CoV-2 in 33 Neonates Born to Mothers With COVID-19 in Wuhan, China. *JAMA*  
12 *pediatrics*. 2020.  
13
- 14 223. Zhang G, Zhang J, Wang B, Zhu X, Wang Q, Qiu S. Analysis of clinical characteristics  
15 and laboratory findings of 95 cases of 2019 novel coronavirus pneumonia in Wuhan, China: a  
16 retrospective analysis. *Respiratory research*. 2020;21(1):74.  
17
- 18 224. Zhang H-n. A Medical Records Based Study for the Correlation between Angiotensin II  
19 Type 1 Receptor Blockers (ARBs) and the Progression and Outcome of Novel Coronavirus  
20 Pneumonia (COVID-19). *Chinese Clinical Trial Registry*. 2020.  
21
- 22 225. Zhang J, Wang X, Jia X, Li J, Hu K, Chen G, et al. Risk factors for disease severity,  
23 unimprovement, and mortality of COVID-19 patients in Wuhan, China. *Clinical microbiology and*  
24 *infection : the official publication of the European Society of Clinical Microbiology and Infectious*  
25 *Diseases*. 2020;26(6):767-72.  
26
- 27 226. Zhang JJ, Dong X, Cao YY, Yuan YD, Yang YB, Yan YQ, et al. Clinical characteristics of  
28 140 patients infected with SARS-CoV-2 in Wuhan, China. *Allergy*. 2020.  
29
- 30 227. Zhang L, Dong L, Ming L, Wei M, Li J, Hu R, et al. Severe Acute Respiratory Syndrome  
31 Coronavirus 2(SARS-CoV-2) infection during late pregnancy: A Report of 18 patients from  
32 Wuhan, China. *Research Square*. 2020.  
33
- 34 228. Zhang L, Zhu F, Xie L, Wang C, Wang J, Chen R, et al. Clinical characteristics of  
35 COVID-19-infected cancer patients: A retrospective case study in three hospitals within Wuhan,  
36 China. *Annals of oncology : official journal of the European Society for Medical Oncology*. 2020.  
37
- 38 229. Zhang MQ, Wang XH, Chen YL, Zhao KL, Cai YQ, An CL, et al. [Clinical features of  
39 2019 novel coronavirus pneumonia in the early stage from a fever clinic in Beijing]. *Zhonghua jie*  
40 *he he hu xi za zhi = Zhonghua jiehe he huxi zazhi = Chinese journal of tuberculosis and*  
41 *respiratory diseases*. 2020;43(0):E013.  
42
- 43 230. Zhang S, Guo M, Duan L, Wu F, Wang Z, Xu J. Short Term Outcomes and Risk Factors  
44 for Mortality in Patients with COVID-19 in Wuhan, China: A Retrospective Study. *SSRN*. 2020.  
45
- 46 231. Zhang WR, Wang K, Yin L, Zhao WF, Xue Q, Peng M, et al. Mental Health and  
47 Psychosocial Problems of Medical Health Workers during the COVID-19 Epidemic in China.  
48 *Psychotherapy and psychosomatics*. 2020:1-9.  
49
- 50 232. Zhang Y, Zheng L, Liu L, Zhao M, Xiao J, Zhao Q. Liver impairment in COVID-19  
51 patients: a retrospective analysis of 115 cases from a single center in Wuhan city, China. *Liver*  
52 *international : official journal of the International Association for the Study of the Liver*. 2020.  
53  
54  
55  
56  
57  
58  
59  
60

- 1  
2  
3 233. Zhang ZJ, Yu XJ, Fu T, Liu Y, Jiang Y, Yang BX, et al. Novel Coronavirus Infection in  
4 Newborn Babies Under 28 Days in China. *The European respiratory journal*. 2020.  
5
- 6 234. Zheng F, Liao C, Fan QH, Chen HB, Zhao XG, Xie ZG, et al. Clinical Characteristics of  
7 Children with Coronavirus Disease 2019 in Hubei, China. *Current medical science*.  
8 2020;40(2):275-80.  
9
- 10 235. Zhou F, Yu T, Du R, Fan G, Liu Y, Liu Z, et al. Clinical course and risk factors for  
11 mortality of adult inpatients with COVID-19 in Wuhan, China: a retrospective cohort study.  
12 *Lancet (London, England)*. 2020;395(10229):1054-62.  
13
- 14 236. Zhou Y, Zhang Z, Tian J, Xiong S. Risk factors associated with disease progression in a  
15 cohort of patients infected with the 2019 novel coronavirus. *Annals of palliative medicine*.  
16 2020;9(2):428-36.  
17
- 18 237. Zhu H, Wang L, Fang C, Peng S, Zhang L, Chang G, et al. Clinical analysis of 10  
19 neonates born to mothers with 2019-nCoV pneumonia. *Translational pediatrics*. 2020;9(1):51-  
20 60.  
21
- 22 238. Zhu Q, Zhao S, Lai X, Zhao J, Guo D, Gan L. Dose-Response Association between Risk  
23 Factors and Incidence of COVID-19 in 325 Hospitalized Patients: A Multicenter Retrospective  
24 Cohort Study. *SSRN*. 2020.  
25
- 26 239. Zhu W, Xie K, Lu H, Xu L, Zhou S, Fang S. Initial clinical features of suspected  
27 Coronavirus Disease 2019 in two emergency departments outside of Hubei, China. *Journal of*  
28 *medical virology*. 2020.  
29
- 30 240. Zhu X, Yuan W, Huang K, Wang Q, Yao S, Lu W, et al. Clinical Features and Short-  
31 Term Outcomes of 114 Elderly Patients with COVID-19 in Wuhan, China: A Single-Center,  
32 Retrospective, Observational Study. *SSRN*. 2020.  
33  
34  
35

### 36 Excluded – duplicate at full text (n=3)

- 37
- 38 1. Cummings MJ, Baldwin MR, Abrams D, Jacobson SD, Meyer BJ, Balough EM, et al.  
39 Epidemiology, clinical course, and outcomes of critically ill adults with COVID-19 in New York  
40 City: a prospective cohort study. *Lancet (London, England)*. 2020;395(10239):1763-70.  
41
- 42 2. Simonnet A, Chetboun M, Poissy J, Raverdy V, Noulette J, Duhamel A, et al. High  
43 Prevalence of Obesity in Severe Acute Respiratory Syndrome Coronavirus-2 (SARS-CoV-2)  
44 Requiring Invasive Mechanical Ventilation. *Obesity (Silver Spring, Md)*. 2020.  
45
- 46 3. Temgoua MN, Kuate LM, Ngatchou W, Sibetcheu A, Toupendi ZN, Belobo G, et al.  
47 Thromboembolic risks in patients with COVID-19: major concern to consider in our  
48 management. *The Pan African medical journal*. 2020;35(Suppl 2):10.  
49  
50  
51

### 52 Excluded – not English or French (n=5)

- 53
- 54 1. Alcocer-Gamba MA, Gutierrez-Fajardo P, Sosa-Caballero A, Cabrera-Rayó A, Faradji-  
55 Hazan RN, Padilla-Padilla FG, et al. Recommendations for the care of patients with diabetes  
56  
57  
58  
59  
60

1  
2  
3 mellitus with risk factors or established cardiovascular disease and SARS-CoV-2mellitus con  
4 factores de riesgo o enfermedad cardiovascular establecida y SARS-CoV-2. Recomendaciones  
5 para la atencion de pacientes con diabetes. 2020;90(Supl):77-83.

6  
7 2. Devulapalli CS. COVID-19 - a mild disease in children. Covid-19 - mildt forlop hos barn.  
8 2020;140(6).

9  
10 3. González Romero D, Ocampo Pérez J, González Bautista L, Santana-Cabrera L.  
11 [Pregnancy and perinatal outcome of a woman with COVID-19 infection]. Revista clinica  
12 espanola. 2020.

13  
14 4. Perez-Girbes A. Acute Pulmonary Embolism and Covid-19: A Common Association in  
15 Seriously Ill Patients? Tromboembolia pulmonar aguda y enfermedad por coronavirus (COVID-  
16 19): una asociacion frecuente en pacientes graves? 2020.

17  
18 5. Sánchez-Álvarez JE, Pérez Fontán M, Jiménez Martín C, Blasco Pelicano M, Cabezas  
19 Reina CJ, Sevillano Prieto Á M, et al. SARS-CoV-2 infection in patients on renal replacement  
20 therapy. Report of the COVID-19 Registry of the Spanish Society of Nephrology (SEN).  
21 Nefrologia : publicacion oficial de la Sociedad Espanola Nefrologia. 2020.

#### 22 23 24 25 **Excluded – no/wrong outcome (n=69)**

26  
27 1. Abrams HR, Loomer L, Gandhi A, Grabowski DC. Characteristics of U.S. Nursing  
28 Homes with COVID-19 Cases. Journal of the American Geriatrics Society. 2020.

29  
30 2. Alanio A, Delliere S, Fodil S, Bretagne S, Megarbane B. Prevalence of putative invasive  
31 pulmonary aspergillosis in critically ill patients with COVID-19. The Lancet Respiratory medicine.  
32 2020;8(6):e48-e9.

33  
34 3. Alvarez-Aragon LM, Cuesta-Munoz AL, Alvarez-Lopez I. Inquiring into Benefits of  
35 Independent Activation of Non-Classical Renin-Angiotensin System in the Clinical Prognosis  
36 and Reduction of COVID-19 mortality. Clinical infectious diseases : an official publication of the  
37 Infectious Diseases Society of America. 2020.

38  
39 4. Arnaud F, Laura T, Yoann M, Rebecca G, Camille B, Nathalie J, et al. Cluster of COVID-  
40 19 in northern France: A retrospective closed cohort study. medRxiv. 2020.

41  
42 5. Bandi S, Nevid MZ, Mahdavinia M. African American children are at higher risk of  
43 COVID-19 infection. Pediatric allergy and immunology : official publication of the European  
44 Society of Pediatric Allergy and Immunology. 2020.

45  
46 6. Benzakoun J, Hmeydia G, Delabarde T, Hamza L, Meder J-F, Ludes B, et al. Excess  
47 out-of-hospital deaths during COVID-19 outbreak: evidence of pulmonary embolism as a main  
48 determinant. European journal of heart failure. 2020.

49  
50 7. Bhasker AG, Greve JW. Are Patients Suffering from Severe Obesity Getting a Raw Deal  
51 During COVID-19 Pandemic? Obesity surgery. 2020:1-2.

52  
53 8. Bouquet J, Tabor DE, Silver JS, Nair V, Tovchigrechko A, Griffin MP, et al. Microbial  
54 burden and viral exacerbations in a longitudinal multicenter COPD cohort. Respiratory research.  
55 2020;21(1):77.

9. Carignan A, Valiquette L, Grenier C, Musonera JB, Nkengurutse D, Marcil-Héguy A, et al. Anosmia and dysgeusia associated with SARS-CoV-2 infection: an age-matched case-control study. *Cmaj*. 2020;192(26):E702-e7.
10. Chiappetta S, Sharma AM, Bottino V, Stier C. COVID-19 and the role of chronic inflammation in patients with obesity. *International journal of obesity (2005)*. 2020.
11. Chin T, Kahn R, Li R, Chen JT, Krieger N, Buckee CO, et al. U.S. county-level characteristics to inform equitable COVID-19 response. *medRxiv : the preprint server for health sciences*. 2020.
12. Cilia R, Bonvegna S, Straccia G, Andreasi NG, Elia AE, Romito LM, et al. Effects of COVID-19 on Parkinson's Disease Clinical Features: A Community-Based Case-Control Study. *Movement disorders : official journal of the Movement Disorder Society*. 2020.
13. Clemency BM, Varughese R, Scheafer DK, Ludwig B, Welch JV, McCormack RF, et al. Symptom Criteria for COVID-19 Testing of Health Care Workers. *Acad Emerg Med*. 2020;27(6):469-74.
14. Cox ZL, Lai P, Lindenfeld J. Deceases in Acute Heart Failure Hospitalizations during COVID-19. *European journal of heart failure*. 2020.
15. D'Avolio A, Avataneo V, Manca A, Cusato J, De Nicolo A, Lucchini R, et al. 25-Hydroxyvitamin D Concentrations Are Lower in Patients with Positive PCR for SARS-CoV-2. *Nutrients*. 2020;12(5).
16. Dangis A, De Brucker N, Heremans A, Gillis M, Frans J, Demeyere A, et al. Impact of gender on extent of lung injury in COVID-19. *Clinical radiology*. 2020;75(7):554-6.
17. David AK, Scott K, Olivier E. Clinical and Genetic Characteristics of Covid-19 Patients from UK Biobank. *medRxiv*. 2020.
18. de Lusignan S, Dorward J, Correa A, Jones N, Akinyemi O, Amirthalingam G, et al. Risk factors for SARS-CoV-2 among patients in the Oxford Royal College of General Practitioners Research and Surveillance Centre primary care network: a cross-sectional study. *The Lancet Infectious diseases*. 2020.
19. Di Castelnuovo A, De Caterina R, de Gaetano G, Iacoviello L. Controversial Relationship between Renin-Angiotensin System Inhibitors and Severity of COVID-19: Announcing a Large Multicentre Case-Control Study in Italy. *Hypertension (Dallas, Tex : 1979)*. 2020.
20. Doglietto F, Vezzoli M, Gheza F, Lussardi GL, Domenicucci M, Vecchiarelli L, et al. Factors Associated With Surgical Mortality and Complications Among Patients With and Without Coronavirus Disease 2019 (COVID-19) in Italy. *JAMA surgery*. 2020.
21. Dreher M, Kersten A, Bickenbach J, Balfanz P, Hartmann B, Cornelissen C, et al. The Characteristics of 50 Hospitalized COVID-19 Patients With and Without ARDS. *Deutsches Arzteblatt international*. 2020;117(16):271-8.
22. Duffy CR, Hart JM, Modest AM, Hacker MR, Golen T, Li Y, et al. Lymphopenia and Severe Acute Respiratory Syndrome Coronavirus 2 (SARS-CoV-2) Infection Among Hospitalized Obstetric Patients. *Obstetrics and gynecology*. 2020.

23. Favalli EG, Agape E, Caporali R. Incidence and Clinical Course of COVID-19 in Patients with Connective Tissue Diseases: A Descriptive Observational Analysis. *The Journal of rheumatology*. 2020.
24. Fernandez-Nieto D, Jimenez-Cauhe J, Suarez-Valle A, Moreno-Arrones OM, Saceda-Corralo D, Arana-Raja A, et al. Characterization of acute acro-ischemic lesions in non-hospitalized patients: a case series of 132 patients during the COVID-19 outbreak. *Journal of the American Academy of Dermatology*. 2020.
25. Fore HH. A wake-up call: COVID-19 and its impact on children's health and wellbeing. *The Lancet Global health*. 2020.
26. Garufi G, Carbognin L, Orlandi A, Tortora G, Bria E. Smoking habit and hospitalization for severe acute respiratory syndrome coronavirus 2 (SARS-CoV-2)-related pneumonia: The unsolved paradox behind the evidence. *European journal of internal medicine*. 2020.
27. Gemes K, Talback M, Modig K, Ahlbom A, Berglund A, Feychting M, et al. Burden and prevalence of prognostic factors for severe COVID-19 in Sweden. *European journal of epidemiology*. 2020;35(5):401-9.
28. Godaert L, Proye E, Demoustier-Tampere D, Coulibaly PS, Hequet F, Drame M. Clinical characteristics of older patients: The experience of a geriatric short-stay unit dedicated to patients with COVID-19 in France. *The Journal of infection*. 2020.
29. Haeck G, Ancion A, Marechal P, Oury C, Lancellotti P. [COVID-19 and cardiovascular diseases]. *COVID-19 et maladies cardiovasculaires*. 2020;75(4):226-32.
30. Hastie CE, Mackay DF, Ho F, Celis-Morales CA, Katikireddi SV, Niedzwiedz CL, et al. Vitamin D concentrations and COVID-19 infection in UK Biobank. *Diabetes Metab Syndr*. 2020;14(4):561-5.
31. Himmelstein DU, Woolhandler S. Health Insurance Status and Risk Factors for Poor Outcomes With COVID-19 Among U.S. Health Care Workers: A Cross-sectional Study. *Annals of internal medicine*. 2020.
32. Hirsch JS, Ng JH, Ross DW, Sharma P, Shah HH, Barnett RL, et al. Acute kidney injury in patients hospitalized with COVID-19. *Kidney international*. 2020.
33. Iacobellis G, Penaherrera CA, Bermudez LE, Bernal Mizrachi E. Admission hyperglycemia and radiological findings of SARS-CoV2 in patients with and without diabetes. *Diabetes research and clinical practice*. 2020;164:108185.
34. Ibrahim LF, Tosif S, McNab S, Hall S, Lee HJ, Lewena S, et al. SARS-CoV-2 testing and outcomes in the first 30 days after the first case of COVID-19 at an Australian children's hospital. *Emerg Med Australas*. 2020.
35. Jo MW, Go DS, Kim R, Lee SW, Ock M, Kim YE, et al. The Burden of Disease due to COVID-19 in Korea Using Disability-Adjusted Life Years. *J Korean Med Sci*. 2020;35(21):e199.
36. Kalan ME, Ghobadi H, Taleb ZB, Ward KD, Adham D, Matin S, et al. Descriptive characteristics of hospitalized adult smokers and never-smokers with COVID-19. *Tobacco induced diseases*. 2020;18:46.

- 1  
2  
3 37. Koehler P, Cornely OA, Bottiger BW, Dusse F, Eichenauer DA, Fuchs F, et al. COVID-  
4 19 associated pulmonary aspergillosis. *Mycoses*. 2020;63(6):528-34.  
5  
6 38. Lechien JR, Chiesa-Estomba CM, Place S, Van Laethem Y, Cabaraux P, Mat Q, et al.  
7 Clinical and epidemiological characteristics of 1420 European patients with mild-to-moderate  
8 coronavirus disease 2019. *J Intern Med*. 2020.  
9  
10 39. Leung JM, Yang CX, Tam A, Shaipanich T, Hackett T-L, Singhera GK, et al. ACE-2  
11 expression in the small airway epithelia of smokers and COPD patients: implications for COVID-  
12 19. *The European respiratory journal*. 2020;55(5).  
13  
14 40. Liotta G, Marazzi MC, Orlando S, Palombi L. Is social connectedness a risk factor for the  
15 spreading of COVID-19 among older adults? The Italian paradox. *PloS one*.  
16 2020;15(5):e0233329.  
17  
18 41. Lo E, Lasnier B. Active smoking and severity of coronavirus disease 2019 (COVID-19):  
19 The use of significance testing leads to an erroneous conclusion. *European journal of internal*  
20 *medicine*. 2020.  
21  
22 42. Maggi U, De Carlis L, Yiu D, Colledan M, Regalia E, Rossi G, et al. The impact of the  
23 COVID-19 outbreak on liver transplantation programs in Northern Italy. *Am J Transplant*.  
24 2020;20(7):1840-8.  
25  
26 43. Michelena X, Borrell H, Lopez-Corbeto M, Lopez-Lasanta M, Moreno E, Pascual-Pastor  
27 M, et al. Incidence of COVID-19 in a cohort of adult and paediatric patients with rheumatic  
28 diseases treated with targeted biologic and synthetic disease-modifying anti-rheumatic drugs.  
29 *Seminars in arthritis and rheumatism*. 2020;50(4):564-70.  
30  
31 44. Montopoli M, Zumerle S, Vettor R, Ruge M, Zorzi M, Catapano CV, et al. Androgen-  
32 deprivation therapies for prostate cancer and risk of infection by SARS-CoV-2: a population-  
33 based study (N = 4532). *Ann Oncol*. 2020.  
34  
35 45. Moschovas MC, Sighinolfi MC, Rocco B, Bhat S, Onof F, Rogers T, et al. Balancing the  
36 Effects of COVID-19 Against Potential Progression and Mortality in High-risk Prostate Cancer.  
37 *European urology*. 2020.  
38  
39 46. Nahama A, Ramachandran R, Cisternas AF, Ji H. The role of afferent pulmonary  
40 innervation in poor prognosis of acute respiratory distress syndrome in COVID-19 patients and  
41 proposed use of resiniferatoxin (RTX) to improve patient outcomes in advanced disease state: A  
42 review. *Medicine in drug discovery*. 2020:100033.  
43  
44 47. Notari A, Torrieri G. COVID-19 transmission risk factors. *medRxiv*. 2020.  
45  
46 48. Nouhjah S, Jahanfar S. Challenges of diabetes care management in developing  
47 countries with a high incidence of COVID-19: A brief report. *Diabetes & metabolic syndrome*.  
48 2020;14(5):731-2.  
49  
50 49. Ossami Saidy RR, Globke B, Pratschke J, Schoening W, Eurich D. Successful  
51 implementation of preventive measures leads to low relevance of SARS-CoV-2 in liver  
52 transplant patients: Observations from a German outpatient department. *Transplant infectious*  
53 *disease : an official journal of the Transplantation Society*. 2020.  
54  
55  
56  
57  
58  
59  
60

- 1  
2  
3 50. Pan F, Ye T, Sun P, Gui S, Liang B, Li L, et al. Time Course of Lung Changes at Chest  
4 CT during Recovery from Coronavirus Disease 2019 (COVID-19). *Radiology*. 2020;295(3):715-  
5 21.  
6  
7 51. Piccolo R, Bruzzese D, Mauro C, Aloia A, Baldi C, Boccalatte M, et al. Population  
8 Trends in Rates of Percutaneous Coronary Revascularization for Acute Coronary Syndromes  
9 Associated with the COVID-19 Outbreak. *Circulation*. 2020.  
10  
11 52. Pinto BG, Oliveira AE, Singh Y, Jimenez L, Goncalves AN, Ogava RL, et al. ACE2  
12 Expression is Increased in the Lungs of Patients with Comorbidities Associated with Severe  
13 COVID-19. *medRxiv : the preprint server for health sciences*. 2020.  
14  
15 53. Ramcharan T, Nolan O, Lai CY, Prabhu N, Krishnamurthy R, Richter AG, et al.  
16 Paediatric Inflammatory Multisystem Syndrome: Temporally Associated with SARS-CoV-2  
17 (PIMS-TS): Cardiac Features, Management and Short-Term Outcomes at a UK Tertiary  
18 Paediatric Hospital. *Pediatric cardiology*. 2020.  
19  
20 54. Rapezzi C, Tavazzi L, Ferrari R. The 'Black Death' and the physician at the time of  
21 COVID-19. *European heart journal*. 2020.  
22  
23 55. Reynolds HR, Adhikari S, Pulgarin C, Troxel AB, Iturrate E, Johnson SB, et al. Renin-  
24 Angiotensin-Aldosterone System Inhibitors and Risk of Covid-19. *The New England journal of*  
25 *medicine*. 2020.  
26  
27 56. Roxby AC, Greninger AL, Hatfield KM, Lynch JB, Dellit TH, James A, et al. Outbreak  
28 Investigation of COVID-19 Among Residents and Staff of an Independent and Assisted Living  
29 Community for Older Adults in Seattle, Washington. *JAMA Intern Med*. 2020.  
30  
31 57. Salzano A, D'Assante R, Stagnaro FM, Valente V, Crisci G, Giardino F, et al. Heart  
32 failure management during COVID-19 outbreak in Italy. *Telemedicine experience from a heart*  
33 *failure university tertiary referral centre*. *European journal of heart failure*. 2020.  
34  
35 58. Sardu C, D'Onofrio N, Balestrieri ML, Barbieri M, Rizzo MR, Messina V, et al. Outcomes  
36 in Patients With Hyperglycemia Affected by Covid-19: Can We Do More on Glycemic Control?  
37 *Diabetes care*. 2020.  
38  
39 59. Seltzer JA, Okeke CAV, Perry JD, Shipman WD, Okoye GA, Byrd AS. Exploring the risk  
40 of severe COVID-19 infection in hidradenitis suppurativa patients. *Journal of the American*  
41 *Academy of Dermatology*. 2020.  
42  
43 60. Sierpiński R, Pinkas J, Jankowski M, Zgliczyński WS, Wierzba W, Gujski M, et al. Sex  
44 differences in the frequency of gastrointestinal symptoms and olfactory or taste disorders in  
45 1942 nonhospitalized patients with coronavirus disease 2019 (COVID-19). *Pol Arch Intern Med*.  
46 2020;130(6):501-5.  
47  
48 61. Siniscalchi A, Gallelli L. Could COVID-19 represent a negative prognostic factor in  
49 patients with stroke? *Infection control and hospital epidemiology*. 2020:1.  
50  
51 62. Stoneham SM, Milne KM, Nuttal E, Frew GH, Sturrock BR, Sivaloganathan H, et al.  
52 Thrombotic risk in COVID-19: a case series and case-control study. *Clinical medicine (London,*  
53 *England)*. 2020.  
54  
55  
56  
57  
58  
59  
60

63. Tang JW, Young S, May S, Bird P, Bron J, Mohamedanif T, et al. Comparing hospitalised, community and staff COVID-19 infection rates during the early phase of the evolving COVID-19 epidemic. *The Journal of infection*. 2020.
64. Tekbali A, Grunebaum A, Saraya A, McCullough L, Bornstein E, Chervenak FA. Pregnant vs nonpregnant severe acute respiratory syndrome coronavirus 2 and coronavirus disease 2019 hospital admissions: the first 4 weeks in New York. *American journal of obstetrics and gynecology*. 2020.
65. Tolia VM, Chan TC, Castillo EM. Preliminary Results of Initial Testing for Coronavirus (COVID-19) in the Emergency Department. *The western journal of emergency medicine*. 2020;21(3):503-6.
66. Tostmann A, Bradley J, Bousema T, Yiek WK, Holwerda M, Bleeker-Rovers C, et al. Strong associations and moderate predictive value of early symptoms for SARS-CoV-2 test positivity among healthcare workers, the Netherlands, March 2020. *Euro Surveill*. 2020;25(16).
67. Wander PL, Orlov M, Merel SE, Enquobahrie DA. Risk factors for severe COVID-19 illness in healthcare workers: Too many unknowns. *Infection control and hospital epidemiology*. 2020:1-2.
68. Zahra R-E, Celeste M, Maddalena A, Mae SB, Jackie C, Cyrus C, et al. NON-WHITE ETHNICITY, MALE SEX, AND HIGHER BODY MASS INDEX, BUT NOT MEDICATIONS ACTING ON THE RENIN-ANGIOTENSIN SYSTEM ARE ASSOCIATED WITH CORONAVIRUS DISEASE 2019 (COVID-19) HOSPITALISATION: REVIEW OF THE FIRST 669 CASES FROM THE UK BIOBANK. *medRxiv*. 2020.
69. Zwald ML, Lin W, Sondermeyer Cooksey GL, Weiss C, Suarez A, Fischer M, et al. Rapid Sentinel Surveillance for COVID-19 - Santa Clara County, California, March 2020. *MMWR Morb Mortal Wkly Rep*. 2020;69(14):419-21.

#### **Excluded – no/wrong risk factor (n=63)**

1. Al-Tawfiq JA, Leonardi R, Fasoli G, Rigamonti D. Prevalence and fatality rates of COVID-19: What are the reasons for the wide variations worldwide? *Travel medicine and infectious disease*. 2020:101711.
2. Alberti P, Beretta S, Piatti M, Karantzoulis A, Piatti ML, Santoro P, et al. Guillain-Barre syndrome related to COVID-19 infection. *Neurology(R) neuroimmunology & neuroinflammation*. 2020;7(4).
3. Balnis J, Adam AP, Chopra A, Chieng HC, Feustel PJ, Overmyer KA, et al. Higher plasma levels of Chemokine CCL19 are associated with poor SARS-CoV-2 acute respiratory distress syndrome (ARDS) outcomes. *medRxiv : the preprint server for health sciences*. 2020.
4. Barrasa H, Rello J, Tejada S, Martín A, Balziskueta G, Vinuesa C, et al. SARS-Cov-2 in Spanish Intensive Care: Early Experience with 15-day Survival In Vitoria. *Anaesthesia, critical care & pain medicine*. 2020.



- 1
  - 2
  - 3
  - 4
  - 5
  - 6
  - 7
  - 8
  - 9
  - 10
  - 11
  - 12
  - 13
  - 14
  - 15
  - 16
  - 17
  - 18
  - 19
  - 20
  - 21
  - 22
  - 23
  - 24
  - 25
  - 26
  - 27
  - 28
  - 29
  - 30
  - 31
  - 32
  - 33
  - 34
  - 35
  - 36
  - 37
  - 38
  - 39
  - 40
  - 41
  - 42
  - 43
  - 44
  - 45
  - 46
  - 47
  - 48
  - 49
  - 50
  - 51
  - 52
  - 53
  - 54
  - 55
  - 56
  - 57
  - 58
  - 59
  - 60
5. Bundschuh C, Egger M, Wiesinger K, Gabriel C, Clodi M, Mueller T, et al. Evaluation of the EDI enzyme linked immunosorbent assays for the detection of SARS-CoV-2 IgM and IgG antibodies in human plasma. *Clin Chim Acta*. 2020;509:79-82.
6. Cantador E, Núñez A, Sobrino P, Espejo V, Fabia L, Vela L, et al. Incidence and consequences of systemic arterial thrombotic events in COVID-19 patients. *J Thromb Thrombolysis*. 2020:1-5.
7. Chan L, Chaudhary K, Saha A, Chauhan K, Vaid A, Baweja M, et al. Acute Kidney Injury in Hospitalized Patients with COVID-19. *medRxiv : the preprint server for health sciences*. 2020.
8. Chatterjee A, Gerdes MW, Martinez SG. Statistical Explorations and Univariate Timeseries Analysis on COVID-19 Datasets to Understand the Trend of Disease Spreading and Death. *Sensors (Basel, Switzerland)*. 2020;20(11).
9. Chen W, Lan Y, Yuan X, Deng X, Li Y, Cai X, et al. Detectable 2019-nCoV viral RNA in blood is a strong indicator for the further clinical severity. *Emerging microbes & infections*. 2020;9(1):469-73.
10. Cheng F-Y, Joshi H, Tandon P, Freeman R, Reich DL, Mazumdar M, et al. Using Machine Learning to Predict ICU Transfer in Hospitalized COVID-19 Patients. *Journal of clinical medicine*. 2020;9(6).
11. David E, Frauke D, Luis B, Maria B, Agustin A, Pietro I, et al. The ABO blood group locus and a chromosome 3 gene cluster associate with SARS-CoV-2 respiratory failure in an Italian-Spanish genome-wide association analysis. *medRxiv*. 2020.
12. De Natale G, Ricciardi V, De Luca G, De Natale D, Di Meglio G, Ferragamo A, et al. The COVID-19 Infection in Italy: A Statistical Study of an Abnormally Severe Disease. *Journal of clinical medicine*. 2020;9(5).
13. Demelo-Rodríguez P, Cervilla-Muñoz E, Ordieres-Ortega L, Parra-Virto A, Toledano-Macías M, Toledo-Samaniego N, et al. Incidence of asymptomatic deep vein thrombosis in patients with COVID-19 pneumonia and elevated D-dimer levels. *Thromb Res*. 2020;192:23-6.
14. Dursun R, Temiz SA. The clinics of HHV-6 infection in COVID-19 pandemic: Pityriasis rosea and Kawasaki disease. *Dermatol Ther*. 2020:e13730.
15. Gautret P, Lagier J-C, Parola P, Hoang VT, Meddeb L, Sevestre J, et al. Clinical and microbiological effect of a combination of hydroxychloroquine and azithromycin in 80 COVID-19 patients with at least a six-day follow up: A pilot observational study. *Travel medicine and infectious disease*. 2020;34:101663.
16. Giudicessi JR, Roden DM, Wilde AAM, Ackerman MJ. Genetic susceptibility for COVID-19-associated sudden cardiac death in African Americans. *Heart rhythm*. 2020.
17. Goldstein MR, Poland GA, Graeber CW. Are certain drugs associated with enhanced mortality in COVID-19? *QJM : monthly journal of the Association of Physicians*. 2020.
18. Hernigou J, Cornil F, Poignard A, El Bouchaibi S, Mani J, Naouri JF, et al. Thoracic computerised tomography scans in one hundred eighteen orthopaedic patients during the

1  
2  
3 COVID-19 pandemic: identification of chest lesions; added values; help in managing patients;  
4 burden on the computerised tomography scan department. *Int Orthop*. 2020:1-10.  
5

6 19. Ihle-Hansen H, Berge T, Tveita A, Ronning EJ, Erno PE, Andersen EL, et al. COVID-19:  
7 Symptoms, course of illness and use of clinical scoring systems for the first 42 patients admitted  
8 to a Norwegian local hospital. *Covid-19: Symptomer, forlop og bruk av kliniske skaringsverktøy*  
9 *hos de 42 forste pasientene innlagt pa et norsk lokalsykehus*. 2020;140(7).  
10

11 20. Ikitimur H, Borku Uysal B, Cengiz M, Ikitimur B, Uysal H, Ozcan E, et al. "Determining  
12 Host Factors Contributing to Disease Severity in a Family Cluster of 29 Hospitalized SARS-  
13 CoV-2 Patients: Could Genetic Factors Be Relevant in the Clinical Course of COVID-19?"  
14 *Journal of medical virology*. 2020.  
15

16 21. Jain R, Young M, Dogra S, Kennedy H, Nguyen V, Raz E. Surprise Diagnosis of COVID-  
17 19 following Neuroimaging Evaluation for Unrelated Reasons during the Pandemic in Hot Spots.  
18 *AJNR Am J Neuroradiol*. 2020.  
19

20 22. Ji H-L, Zhao R, Matalon S, Matthay MA. Elevated Plasmin(ogen) as a Common Risk  
21 Factor for COVID-19 Susceptibility. *Physiological reviews*. 2020;100(3):1065-75.  
22

23 23. Kang Y, Chen T, Mui D, Ferrari V, Jagasia D, Scherrer-Crosbie M, et al. Cardiovascular  
24 manifestations and treatment considerations in covid-19. *Heart (British Cardiac Society)*. 2020.  
25

26 24. Kong Q, Xiang Z, Wu Y, Gu Y, Guo J, Geng F. Analysis of the susceptibility of lung  
27 cancer patients to SARS-CoV-2 infection. *Molecular cancer*. 2020;19(1):80.  
28

29 25. Kox M, Frenzel T, Schouten J, van de Veerdonk FL, Koenen HJPM, Pickkers P, et al.  
30 COVID-19 patients exhibit less pronounced immune suppression compared with bacterial septic  
31 shock patients. *Critical care (London, England)*. 2020;24(1):263.  
32

33 26. Kyle J, Maedeh K-K, Blake J, Larisa GT. The Association Between Angiotensin-  
34 Converting Enzyme Inhibitors and Angiotensin Receptor Blockers and the Number of Covid-19  
35 Confirmed Cases and Deaths in the United States: Geospatial Study. *medRxiv*. 2020.  
36

37 27. Lala A, Johnson KW, Russak AJ, Paranjpe I, Zhao S, Solani S, et al. Prevalence and  
38 Impact of Myocardial Injury in Patients Hospitalized with COVID-19 Infection. *medRxiv : the*  
39 *preprint server for health sciences*. 2020.  
40

41 28. Larson AS, Savastano L, Kadirvel R, Kallmes DF, Hassan AE, Brinjikji W. COVID-19  
42 and the Cerebro-Cardiovascular Systems: What do we Know so Far? *Journal of the American*  
43 *Heart Association*. 2020:e016793.  
44

45 29. Liu F, Li L, Xu M, Wu J, Luo D, Zhu Y, et al. Prognostic value of interleukin-6, C-reactive  
46 protein, and procalcitonin in patients with COVID-19. *Journal of clinical virology : the official*  
47 *publication of the Pan American Society for Clinical Virology*. 2020;127:104370.  
48

49 30. Liu Z, Jin C, Wu CC, Liang T, Zhao H, Wang Y, et al. Association between Initial Chest  
50 CT or Clinical Features and Clinical Course in Patients with Coronavirus Disease 2019  
51 Pneumonia. *Korean journal of radiology*. 2020;21(6):736-45.  
52

53 31. Lyons-Weiler J. Pathogenic Priming Likely Contributes to Serious and Critical Illness and  
54 Mortality in COVID-19 via Autoimmunity. *Journal of translational autoimmunity*. 2020:100051.  
55  
56  
57  
58

- 1  
2  
3 32. Mancia G, Rea F, Ludergnani M, Apolone G, Corrao G. Renin-Angiotensin-Aldosterone  
4 System Blockers and the Risk of Covid-19. *The New England journal of medicine*. 2020.  
5
- 6 33. Marullo AG, Cavarretta E, Biondi-Zoccai G, Mancone M, Peruzzi M, Piscioneri F, et al.  
7 Extracorporeal membrane oxygenation for critically ill patients with coronavirus-associated  
8 disease 2019: an updated perspective of the European experience. *Minerva cardioangiologica*.  
9 2020.  
10
- 11 34. Mathew D, Giles JR, Baxter AE, Greenplate AR, Wu JE, Alanio C, et al. Deep immune  
12 profiling of COVID-19 patients reveals patient heterogeneity and distinct immunotypes with  
13 implications for therapeutic interventions. *bioRxiv : the preprint server for biology*. 2020.  
14
- 15 35. McRae MP, Simmons GW, Christodoulides NJ, Lu Z, Kang SK, Fenyo D, et al. Clinical  
16 Decision Support Tool and Rapid Point-of-Care Platform for Determining Disease Severity in  
17 Patients with COVID-19. *medRxiv : the preprint server for health sciences*. 2020.  
18
- 19 36. Mehta N, Kalra A, Nowacki AS, Anjewierden S, Han Z, Bhat P, et al. Association of Use  
20 of Angiotensin-Converting Enzyme Inhibitors and Angiotensin II Receptor Blockers With Testing  
21 Positive for Coronavirus Disease 2019 (COVID-19). *JAMA cardiology*. 2020.  
22
- 23 37. Negri E, Scarpino V, La Vecchia C. Prevalence of COVID-19-like symptoms in Italy and  
24 Lombardy, March-April 2020, and their implications on cancer prevention, diagnosis and  
25 management. *Eur J Cancer Prev*. 2020.  
26
- 27 38. Öztürk F, Karaduman M, Çoldur R, İncecik Ş, Güneş Y, Tuncer M. Interpretation of  
28 arrhythmogenic effects of COVID-19 disease through ECG. *Aging Male*. 2020:1-4.  
29
- 30 39. Park PG, Kim CH, Heo Y, Kim TS, Park CW, Kim CH. Out-of-Hospital Cohort Treatment  
31 of Coronavirus Disease 2019 Patients with Mild Symptoms in Korea: an Experience from a  
32 Single Community Treatment Center. *Journal of Korean medical science*. 2020;35(13):e140.  
33
- 34 40. Patel A, Charani E, Ariyanayagam D, Abdulaal A, Denny SJ, Mughal N, et al. New-onset  
35 anosmia and ageusia in adult patients diagnosed with SARS-CoV-2 infection. *Clin Microbiol*  
36 *Infect*. 2020.  
37
- 38 41. Pereira A, Cruz-Melguizo S, Adrien M, Fuentes L, Marin E, Perez-Medina T. Clinical  
39 course of Coronavirus Disease-2019 (COVID-19) in pregnancy. *Acta obstetrica et gynecologica*  
40 *Scandinavica*. 2020.  
41
- 42 42. Pinto BGG, Oliveira AER, Singh Y, Jimenez L, Goncalves ANA, Ogava RLT, et al. ACE2  
43 Expression is Increased in the Lungs of Patients with Comorbidities Associated with Severe  
44 COVID-19. *The Journal of infectious diseases*. 2020.  
45
- 46 43. Potdar AA, Dube S, Naito T, Botwin G, Haritunians T, Li D, et al. Reduced expression of  
47 COVID-19 host receptor, ACE2 is associated with small bowel inflammation, more severe  
48 disease, and response to anti-TNF therapy in Crohn's disease. *medRxiv : the preprint server for*  
49 *health sciences*. 2020.  
50
- 51 44. Renieris G, Katrini K, Damoulari C, Akinosoglou K, Psarrakis C, Kyriakopoulou M, et al.  
52 Serum Hydrogen Sulfide and Outcome Association in Pneumonia by the SARS-CoV-2  
53 Coronavirusxs. *Shock (Augusta, Ga)*. 2020.  
54  
55  
56  
57  
58  
59  
60

- 1  
2  
3 45. Roschewski M, Lionakis MS, Sharman JP, Roswarski J, Goy A, Monticelli MA, et al. Inhibition of Bruton tyrosine kinase in patients with severe COVID-19. *Science immunology*. 2020;5(48).  
4  
5  
6  
7 46. Rovina N, Akinosoglou K, Eugen-Olsen J, Hayek S, Reiser J, Giamarellos-Bourboulis EJ. Soluble urokinase plasminogen activator receptor (suPAR) as an early predictor of severe  
8 respiratory failure in patients with COVID-19 pneumonia. *Critical care (London, England)*.  
9 2020;24(1):187.  
10  
11 47. Rubin SJS, Falkson SR, Degner NR, Blish C. Clinical characteristics associated with  
12 COVID-19 severity in California. *Journal of Clinical and Translational Science*. 2020:1-4.  
13  
14 48. Sayoni D, Krystyna T, Matthew P, James K, Marcin P, Claus Erik J, et al. Identification  
15 and Analysis of Shared Risk Factors in Sepsis and High Mortality Risk COVID-19 Patients.  
16 medRxiv. 2020.  
17  
18 49. Sberna G, Amendola A, Valli MB, Carletti F, Capobianchi MR, Bordi L, et al. Trend of  
19 respiratory pathogens during the COVID-19 epidemic. *J Clin Virol*. 2020;129:104470.  
20  
21 50. Shant A, Juan AR, Lei L, Carolyn T. The Association Between Biomarkers and Clinical  
22 Outcomes in Novel Coronavirus (COVID-19) Pneumonia in a U.S. Cohort. medRxiv. 2020.  
23  
24 51. Smith-Ray R, Roberts EE, Littleton DE, Singh T, Sandberg T, Taitel M. United States  
25 distribution of patients at risk for complications related to COVID-19. *JMIR public health and*  
26 *surveillance*. 2020.  
27  
28 52. Solaimanzadeh I. Nifedipine and Amlodipine Are Associated With Improved Mortality  
29 and Decreased Risk for Intubation and Mechanical Ventilation in Elderly Patients Hospitalized  
30 for COVID-19. *Cureus*. 2020;12(5):e8069.  
31  
32 53. Tharakan S, Nomoto K, Miyashita S, Ishikawa K. Body temperature correlates with  
33 mortality in COVID-19 patients. *Critical care (London, England)*. 2020;24(1):298.  
34  
35 54. Tobias H, III, Vindi J, Chiara A, Johannes CH, Michael B-B, Matthias K, et al. Level of IL-  
36 6 predicts respiratory failure in hospitalized symptomatic COVID-19 patients. medRxiv. 2020.  
37  
38 55. Toubiana J, Poirault C, Corsia A, Bajolle F, Fourgeaud J, Angoulvant F, et al. Kawasaki-  
39 like multisystem inflammatory syndrome in children during the covid-19 pandemic in Paris,  
40 France: prospective observational study. *Bmj*. 2020;369:m2094.  
41  
42 56. Vaira LA, Deiana G, Fois AG, Pirina P, Madeddu G, De Vito A, et al. Objective  
43 evaluation of anosmia and ageusia in COVID-19 patients: Single-center experience on 72  
44 cases. *Head & neck*. 2020;42(6):1252-8.  
45  
46 57. Vanni G, Materazzo M, Santori F, Pellicciaro M, Costesta M, Orsaria P, et al. The Effect  
47 of Coronavirus (COVID-19) on Breast Cancer Teamwork: A Multicentric Survey. *In Vivo*.  
48 2020;34(3 Suppl):1685-94.  
49  
50 58. Wadhera RK, Wadhera P, Gaba P, Figueroa JF, Joynt Maddox KE, Yeh RW, et al.  
51 Variation in COVID-19 Hospitalizations and Deaths Across New York City Boroughs. *JAMA*.  
52 2020.  
53  
54  
55  
56  
57  
58  
59  
60

- 1
- 2
- 3
- 4 59. Wollenstein-Betech S, Cassandras CG, Paschalidis IC. Personalized Predictive Models  
5 for Symptomatic COVID-19 Patients Using Basic Preconditions: Hospitalizations, Mortality, and  
6 the Need for an ICU or Ventilator. medRxiv : the preprint server for health sciences. 2020.
- 7
- 8 60. Yadaw AS, Li Y-C, Bose S, Iyengar R, Bunyavanich S, Pandey G. Clinical predictors of  
9 COVID-19 mortality. medRxiv : the preprint server for health sciences. 2020.
- 10
- 11 61. Zaninotto M, Mion MM, Cosma C, Rinaldi D, Plebani M. Presepsin in risk stratification of  
12 SARS-CoV-2 patients. Clinica chimica acta; international journal of clinical chemistry.  
13 2020;507:161-3.
- 14
- 15 62. Zietz M, Tatonetti NP. Testing the association between blood type and COVID-19  
16 infection, intubation, and death. medRxiv : the preprint server for health sciences. 2020.
- 17
- 18 63. Zietz M, Tatonetti N. Testing the association between blood type and COVID-19  
19 infection, intubation, and death. medRxiv : the preprint server for health sciences. 2020.
- 20
- 21

#### 22 **Excluded – unadjusted data (n=69)**

- 23
- 24 1. Coronavirus Disease 2019 in Children - United States, February 12-April 2, 2020.  
25 MMWR Morb Mortal Wkly Rep. 2020;69(14):422-6.
- 26
- 27 2. COVID-19, Australia: Epidemiology Report 15 (Reporting week to 23:59 AEST 10 May  
28 2020). Commun Dis Intell (2018). 2020;44.
- 29
- 30 3. Aggarwal S, Garcia-Telles N, Aggarwal G, Lavie C, Lippi G, Henry BM. Clinical features,  
31 laboratory characteristics, and outcomes of patients hospitalized with coronavirus disease 2019  
32 (COVID-19): Early report from the United States. Diagnosis (Berlin, Germany). 2020;7(2):91-6.
- 33
- 34 4. Arentz M, Yim E, Klaff L, Lokhandwala S, Riedo FX, Chong M, et al. Characteristics and  
35 Outcomes of 21 Critically Ill Patients With COVID-19 in Washington State. JAMA. 2020.
- 36
- 37 5. Argenziano MG, Bruce SL, Slater CL, Tiao JR, Baldwin MR, Barr RG, et al.  
38 Characterization and clinical course of 1000 Patients with COVID-19 in New York: retrospective  
39 case series. medRxiv : the preprint server for health sciences. 2020.
- 40
- 41 6. Argenziano MG, Bruce SL, Slater CL, Tiao JR, Baldwin MR, Barr RG, et al.  
42 Characterization and clinical course of 1000 patients with coronavirus disease 2019 in New  
43 York: retrospective case series. BMJ (Clinical research ed). 2020;369:m1996.
- 44
- 45 7. Bhopal S, Bagaria J, Bhopal R. Children's mortality from COVID-19 compared with all-  
46 deaths and other relevant causes of death: epidemiological information for decision-making by  
47 parents, teachers, clinicians and policymakers. Public health. 2020;185:19-20.
- 48
- 49 8. Biagi A, Rossi L, Malagoli A, Zanni A, Sticozzi C, Comastri G, et al. Clinical and  
50 epidemiological characteristics of 320 deceased Covid-19 patients in an Italian Province: a  
51 retrospective observational study. Journal of medical virology. 2020.
- 52
- 53 9. Blitz MJ, Grunebaum A, Tekbali A, Bornstein E, Rochelson B, Nimaroff M, et al.  
54 Intensive care unit admissions for pregnant and nonpregnant women with coronavirus disease  
55 2019. American journal of obstetrics and gynecology. 2020.
- 56
- 57
- 58
- 59

10. Borghesi A, Zigliani A, Masciullo R, Golemi S, Maculotti P, Farina D, et al. Radiographic severity index in COVID-19 pneumonia: relationship to age and sex in 783 Italian patients. *La Radiologia medica*. 2020;125(5):461-4.
11. Brambilla I, Castagnoli R, Caimmi S, Ciprandi G, Luigi Marseglia G. COVID-19 in the Pediatric Population Admitted to a Tertiary Referral Hospital in Northern Italy: Preliminary Clinical Data. *The Pediatric infectious disease journal*. 2020;39(7):e160.
12. Cagnacci A, Xholli A. Age-related difference in the rate of COVID-19 mortality in women versus men. *American journal of obstetrics and gynecology*. 2020.
13. Caussy C, Wallet F, Laville M, Disse E. Obesity is Associated with Severe Forms of COVID-19. *Obesity (Silver Spring, Md)*. 2020.
14. Damiani G, Pacifico A, Bragazzi NL, Malagoli P. Biologics increase the risk of SARS-CoV-2 infection and hospitalization, but not ICU admission and death: Real-life data from a large cohort during red-zone declaration. *Dermatologic therapy*. 2020:e13475.
15. DeBiasi RL, Song X, Delaney M, Bell M, Smith K, Pershad J, et al. Severe COVID-19 in Children and Young Adults in the Washington, DC Metropolitan Region. *The Journal of pediatrics*. 2020.
16. Duanmu Y, Brown IP, Gibb WR, Singh J, Matheson LW, Blomkalns AL, et al. Characteristics of Emergency Department Patients With COVID-19 at a Single Site in Northern California: Clinical Observations and Public Health Implications. *Academic emergency medicine : official journal of the Society for Academic Emergency Medicine*. 2020;27(6):505-9.
17. Easom N, Moss P, Barlow G, Samson A, Taynton T, Adams K, et al. 68 Consecutive patients assessed for COVID-19 infection; experience from a UK regional infectious disease unit. *Influenza and other respiratory viruses*. 2020.
18. Ferguson J, Rosser JI, Quintero O, Scott J, Subramanian A, Gumma M, et al. Characteristics and Outcomes of Coronavirus Disease Patients under Nonsurge Conditions, Northern California, USA, March-April 2020. *Emerging infectious diseases*. 2020;26(8).
19. Fernandez-Ruiz M, Andres A, Loinaz C, Delgado JF, Lopez-Medrano F, San Juan R, et al. COVID-19 in solid organ transplant recipients: A single-center case series from Spain. *American journal of transplantation : official journal of the American Society of Transplantation and the American Society of Transplant Surgeons*. 2020.
20. Foster CE, Moulton EA, Munoz FM, Hulten KG, Versalovic J, Dunn J, et al. Coronavirus Disease 2019 in Children Cared for at Texas Children's Hospital: Initial Clinical Characteristics and Outcomes. *Journal of the Pediatric Infectious Diseases Society*. 2020.
21. Garazzino S, Montagnani C, Dona D, Meini A, Felici E, Vergine G, et al. Multicentre Italian study of SARS-CoV-2 infection in children and adolescents, preliminary data as at 10 April 2020. *Euro surveillance : bulletin European sur les maladies transmissibles = European communicable disease bulletin*. 2020;25(18).
22. Garg S, Kim L, Whitaker M, O'Halloran A, Cummings C, Holstein R, et al. Hospitalization Rates and Characteristics of Patients Hospitalized with Laboratory-Confirmed Coronavirus

- 1  
2  
3 Disease 2019 - COVID-NET, 14 States, March 1-30, 2020. MMWR Morbidity and mortality  
4 weekly report. 2020;69(15):458-64.  
5
- 6 23. Gebhard C, Regitz-Zagrosek V, Neuhauser HK, Morgan R, Klein SL. Impact of sex and  
7 gender on COVID-19 outcomes in Europe. *Biology of sex differences*. 2020;11(1):29.  
8
- 9 24. Giorgi Rossi P, Emilia-Romagna C-wg, Broccoli S, Angelini P. Case fatality rate in  
10 patients with COVID-19 infection and its relationship with length of follow up. *Journal of clinical*  
11 *virology : the official publication of the Pan American Society for Clinical Virology*.  
12 2020;128:104415.  
13
- 14 25. Gisondi P, Zaza G, Del Giglio M, Rossi M, Iacono V, Girolomoni G. Risk of  
15 hospitalization and death from COVID-19 infection in patients with chronic plaque psoriasis  
16 receiving a biologic treatment and renal transplant recipients in maintenance  
17 immunosuppressive treatment. *Journal of the American Academy of Dermatology*. 2020.  
18
- 19 26. Goker H, Aladag Karakulak E, Demiroglu H, Ayaz Ceylan CM, Buyukasik Y, Inkaya AC,  
20 et al. The effects of blood group types on the risk of COVID-19 infection and its clinical outcome.  
21 *Turkish journal of medical sciences*. 2020.  
22
- 23 27. Gold JAW, Wong KK, Szablewski CM, Patel PR, Rossow J, da Silva J, et al.  
24 Characteristics and Clinical Outcomes of Adult Patients Hospitalized with COVID-19 - Georgia,  
25 March 2020. MMWR Morbidity and mortality weekly report. 2020;69(18):545-50.  
26
- 27 28. Grasselli G, Zangrillo A, Zanella A, Antonelli M, Cabrini L, Castelli A, et al. Baseline  
28 Characteristics and Outcomes of 1591 Patients Infected With SARS-CoV-2 Admitted to ICUs of  
29 the Lombardy Region, Italy. *JAMA*. 2020.  
30
- 31 29. Gubatan J, Levitte S, Balabanis T, Patel A, Sharma A, Habtezion A. SARS-CoV-2  
32 Testing, Prevalence, and Predictors of COVID-19 in Patients with Inflammatory Bowel Disease  
33 in Northern California. *Gastroenterology*. 2020.  
34
- 35 30. Hong KS, Lee KH, Chung JH, Shin KC, Choi EY, Jin HJ, et al. Clinical Features and  
36 Outcomes of 98 Patients Hospitalized with SARS-CoV-2 Infection in Daegu, South Korea: A  
37 Brief Descriptive Study. *Yonsei medical journal*. 2020;61(5):431-7.  
38
- 39 31. Inciardi RM, Adamo M, Lupi L, Cani DS, Di Pasquale M, Tomasoni D, et al.  
40 Characteristics and outcomes of patients hospitalized for COVID-19 and cardiac disease in  
41 Northern Italy. *European heart journal*. 2020;41(19):1821-9.  
42
- 43 32. Israelsen SB, Kristiansen KT, Hindsberger B, Ulrik CS, Andersen O, Jensen M, et al.  
44 Characteristics of patients with COVID-19 pneumonia at Hvidovre Hospital, March-April 2020.  
45 *Danish medical journal*. 2020;67(6).  
46
- 47 33. Itelman E, Wasserstrum Y, Segev A, Avaky C, Negru L, Cohen D, et al. Clinical  
48 Characterization of 162 COVID-19 patients in Israel: Preliminary Report from a Large Tertiary  
49 Center. *The Israel Medical Association journal : IMAJ*. 2020;22(5):271-4.  
50
- 51 34. Kato H, Shimizu H, Shibue Y, Hosoda T, Iwabuchi K, Nagamine K, et al. Clinical course  
52 of 2019 novel coronavirus disease (COVID-19) in individuals present during the outbreak on the  
53 Diamond Princess cruise ship. *Journal of infection and chemotherapy : official journal of the*  
54 *Japan Society of Chemotherapy*. 2020.  
55  
56  
57  
58  
59

- 1  
2  
3 35. Kayem G, Alessandrini V, Azria E, Blanc J, Bohec C, Bornes M, et al. A snapshot of the  
4 Covid-19 pandemic among pregnant women in France. *Journal of gynecology obstetrics and*  
5 *human reproduction*. 2020:101826.  
6  
7 36. Kebisek J, Forrest LJ, Maule AL, Steelman RA, Ambrose JF. Special report: Prevalence  
8 of selected underlying health conditions among active component Army service members with  
9 coronavirus disease 2019, 11 February-6 April 2020. *Msmr*. 2020;27(5):50-4.  
10  
11 37. Kim ES, Chin BS, Kang CK, Kim NJ, Kang YM, Choi JP, et al. Clinical Course and  
12 Outcomes of Patients with Severe Acute Respiratory Syndrome Coronavirus 2 Infection: a  
13 Preliminary Report of the First 28 Patients from the Korean Cohort Study on COVID-19. *Journal*  
14 *of Korean medical science*. 2020;35(13):e142.  
15  
16 38. Kim T, Park O, Yoo H, Ahn S, Jo J, Kim JW, et al. Epidemiological and Clinical  
17 Characteristics of Early 101 Deceased Patients in the Coronavirus Disease-19 (COVID-19)  
18 Outbreak in Republic of Korea. *SSRN*. 2020.  
19  
20 39. Kluytmans-van den Bergh MFQ, Buiting AGM, Pas SD, Bentvelsen RG, van den  
21 Bijllaardt W, van Oudheusden AJG, et al. Prevalence and Clinical Presentation of Health Care  
22 Workers With Symptoms of Coronavirus Disease 2019 in 2 Dutch Hospitals During an Early  
23 Phase of the Pandemic. *JAMA Netw Open*. 2020;3(5):e209673.  
24  
25 40. Kuno T, Takahashi M, Obata R, Maeda T. Cardiovascular comorbidities, cardiac injury,  
26 and prognosis of COVID-19 in New York City. *American heart journal*. 2020;226:24-5.  
27  
28 41. Latif F, Farr MA, Clerkin KJ, Habal MV, Takeda K, Naka Y, et al. Characteristics and  
29 Outcomes of Recipients of Heart Transplant With Coronavirus Disease 2019. *JAMA cardiology*.  
30 2020.  
31  
32 42. Lee J, Lee YH, Chang H-H, Choi SH, Seo H, Yoo SS, et al. Comparison of short-term  
33 mortality between mechanically ventilated patients with COVID-19 and influenza in a setting of  
34 sustainable healthcare system. *The Journal of infection*. 2020.  
35  
36 43. Lewnard JA, Liu VX, Jackson ML, Schmidt MA, Jewell BL, Flores JP, et al. Incidence,  
37 clinical outcomes, and transmission dynamics of severe coronavirus disease 2019 in California  
38 and Washington: prospective cohort study. *BMJ (Clinical research ed)*. 2020;369:m1923.  
39  
40 44. Lighter J, Phillips M, Hochman S, Sterling S, Johnson D, Francois F, et al. Obesity in  
41 patients younger than 60 years is a risk factor for Covid-19 hospital admission. *Clinical*  
42 *infectious diseases : an official publication of the Infectious Diseases Society of America*. 2020.  
43  
44 45. Manzoni P, Milillo C. Covid-19 mortality in Italian doctors. *The Journal of infection*. 2020.  
45  
46 46. Marin-Hernandez D, Schwartz RE, Nixon DF. Epidemiological evidence for association  
47 between higher influenza vaccine uptake in the elderly and lower COVID-19 deaths in Italy.  
48 *Journal of medical virology*. 2020.  
49  
50 47. Medetalibeyoglu A, Senkal N, Capar G, Kose M, Tukek T. Characteristics of the initial  
51 patients hospitalized for COVID-19: a single-center report. *Turkish journal of medical sciences*.  
52 2020.  
53  
54  
55  
56  
57  
58  
59  
60



- 1  
2  
3 48. Miyashita H, Mikami T, Chopra N, Yamada T, Chernyavsky S, Rizk D, et al. Do patients  
4 with cancer have a poorer prognosis of COVID-19? An experience in New York City. *Annals of*  
5 *oncology : official journal of the European Society for Medical Oncology*. 2020.  
6
- 7 49. Myers LC, Parodi SM, Escobar GJ, Liu VX. Characteristics of Hospitalized Adults With  
8 COVID-19 in an Integrated Health Care System in California. *JAMA*. 2020.  
9
- 10 50. Newport KB, Malhotra S, Widera E. Prognostication and Proactive Planning in COVID-  
11 19. *Journal of pain and symptom management*. 2020.  
12
- 13 51. Nowak B, Szymanski P, Pankowski I, Szarowska A, Zycinska K, Rogowski W, et al.  
14 Clinical characteristics and short-term outcomes of patients with coronavirus disease 2019: a  
15 retrospective single-center experience of a designated hospital in Poland. *Polish archives of*  
16 *internal medicine*. 2020;130(5):407-11.  
17
- 18 52. Oualha M, Bendavid M, Berteloot L, Corsia A, Lesage F, Vedrenne M, et al. Severe and  
19 fatal forms of COVID-19 in children. *Archives de pediatrie : organe officiel de la Societe*  
20 *francaise de pediatrie*. 2020.  
21
- 22 53. Paranjpe I, Russak A, De Freitas JK, Lala A, Miotto R, Vaid A, et al. Clinical  
23 Characteristics of Hospitalized Covid-19 Patients in New York City. *medRxiv : the preprint*  
24 *server for health sciences*. 2020.  
25
- 26 54. Razanamahery J, Malinowski L, Humbert S, Brunel AS, Lepiller Q, Chirouze C, et al.  
27 Predictive factors of poor outcomes in the COVID-19 epidemic: Consider the inflammatory  
28 response. *Medecine et maladies infectieuses*. 2020.  
29
- 30 55. Richardson S, Hirsch JS, Narasimhan M, Crawford JM, McGinn T, Davidson KW, et al.  
31 Presenting Characteristics, Comorbidities, and Outcomes Among 5700 Patients Hospitalized  
32 With COVID-19 in the New York City Area. *JAMA*. 2020.  
33
- 34 56. Rogado J, Pangua C, Serrano-Montero G, Obispo B, Marino AM, Perez-Perez M, et al.  
35 Covid-19 and lung cancer: A greater fatality rate? *Lung cancer (Amsterdam, Netherlands)*.  
36 2020;146:19-22.  
37
- 38 57. Russell TW, Hellewell J, Jarvis CI, van Zandvoort K, Abbott S, Ratnayake R, et al.  
39 Estimating the infection and case fatality ratio for coronavirus disease (COVID-19) using age-  
40 adjusted data from the outbreak on the Diamond Princess cruise ship, February 2020. *Euro*  
41 *surveillance : bulletin Europeen sur les maladies transmissibles = European communicable*  
42 *disease bulletin*. 2020;25(12).  
43
- 44 58. Savasi VM, Parisi F, Patane L, Ferrazzi E, Frigerio L, Pellegrino A, et al. Clinical  
45 Findings and Disease Severity in Hospitalized Pregnant Women With Coronavirus Disease  
46 2019 (COVID-19). *Obstetrics and gynecology*. 2020.  
47
- 48 59. Shah SJ, Barish PN, Prasad PA, Kistler AL, Neff N, Kamm J, et al. Clinical features,  
49 diagnostics, and outcomes of patients presenting with acute respiratory illness: a comparison of  
50 patients with and without COVID-19. *medRxiv : the preprint server for health sciences*. 2020.  
51
- 52 60. Shekerdemian LS, Mahmood NR, Wolfe KK, Riggs BJ, Ross CE, McKiernan CA, et al.  
53 Characteristics and Outcomes of Children With Coronavirus Disease 2019 (COVID-19) Infection  
54 Admitted to US and Canadian Pediatric Intensive Care Units. *JAMA pediatrics*. 2020.  
55  
56  
57  
58  
59

- 1  
2  
3 61. Solomon IH, Normandin E, Bhattacharyya S, Mukerji SS, Keller K, Ali AS, et al.  
4 Neuropathological Features of Covid-19. *The New England journal of medicine*. 2020.  
5  
6 62. Soneji S, Beltran-Sanchez H, Yang J, Mann C. Population-Level Mortality Rates from  
7 Novel Coronavirus (COVID-19) in South Korea. *medRxiv : the preprint server for health*  
8 *sciences*. 2020.  
9  
10 63. Stroppa EM, Toscani I, Citterio C, Anselmi E, Zaffignani E, Codeluppi M, et al.  
11 Coronavirus disease-2019 in cancer patients. A report of the first 25 cancer patients in a  
12 western country (Italy). *Future oncology (London, England)*. 2020.  
13  
14 64. Team CC-R. Characteristics of Health Care Personnel with COVID-19 - United States,  
15 February 12-April 9, 2020. *MMWR Morbidity and mortality weekly report*. 2020;69(15):477-81.  
16  
17 65. Team CC-R. Preliminary Estimates of the Prevalence of Selected Underlying Health  
18 Conditions Among Patients with Coronavirus Disease 2019 - United States, February 12-March  
19 28, 2020. *MMWR Morbidity and mortality weekly report*. 2020;69(13):382-6.  
20  
21 66. Tedeschi S, Giannella M, Bartoletti M, Trapani F, Tadolini M, Borghi C, et al. Clinical  
22 impact of renin-angiotensin system inhibitors on in-hospital mortality of patients with  
23 hypertension hospitalized for COVID-19. *Clinical infectious diseases : an official publication of*  
24 *the Infectious Diseases Society of America*. 2020.  
25  
26 67. Tomlins J, Hamilton F, Gunning S, Sheehy C, Moran E, MacGowan A. Clinical features  
27 of 95 sequential hospitalised patients with novel coronavirus 2019 disease (COVID-19), the first  
28 UK cohort. *The Journal of infection*. 2020.  
29  
30 68. Turk MA, Landes SD, Formica MK, Goss KD. Intellectual and developmental disability  
31 and COVID-19 case-fatality trends: TriNetX analysis. *Disabil Health J*. 2020:100942.  
32  
33 69. Vuagnat P, Frelaut M, Ramtohl T, Basse C, Diakite S, Noret A, et al. COVID-19 in  
34 breast cancer patients: a cohort at the Institut Curie hospitals in the Paris area. *Breast cancer*  
35 *research : BCR*. 2020;22(1):55.  
36

### 37 **Excluded – not peer reviewed/ongoing study (n=90)**

- 38  
39 1. Evaluation of the effect of oral intermediate chain triglyceride on prognosis and course of  
40 disease in suspected outpatients with COVID-19. *Iranian Registry of Clinical Trials*. 2020.  
41  
42 2. Abedi V, Olulana O, Avula V, Chaudhary D, Khan A, Shahjouei S, et al. Racial,  
43 Economic and Health Inequality and COVID-19 Infection in the United States. *medRxiv : the*  
44 *preprint server for health sciences*. 2020.  
45  
46 3. Arbeitsgemeinschaft medikamentöse T. Austrian COVID-19 Registry. *clinicaltrials.gov*.  
47 2020.  
48  
49 4. Assaf-Harofeh Medical C. Evaluating the Immune Response for COVID-19.  
50 *clinicaltrials.gov*. 2020.  
51  
52 5. Assistance Publique - Hôpitaux de P. Clinical Characterisation Protocol for COVID-19 in  
53 People Living With HIV. *clinicaltrials.gov*. 2020.  
54  
55  
56  
57  
58  
59  
60

- 1
- 2
- 3 6. Assistance Publique - Hôpitaux de P. Prevalence and Impact of SARS-COV-2 Infection
- 4 in Pregnant Women, Fetuses and Newborns. *clinicaltrials.gov*. 2020.
- 5
- 6 7. Assistance Publique Hopitaux De M. Morbi-mortality by COVID-19 Among Homeless
- 7 People in Marseille: a Cohort Study. *clinicaltrials.gov*. 2020.
- 8
- 9 8. Austral University A. Liver Injury in Patients With COVID-19. *clinicaltrials.gov*. 2020.
- 10
- 11 9. Aveni F. CORONA: A Study Using DeltaRex-G Gene Therapy for Symptomatic COVID-
- 12 19. *clinicaltrials.gov*. 2020.
- 13
- 14 10. Azienda Usl di B. Risk Factors for Prolonged Invasive Mechanical Ventilation in COVID-
- 15 19 Acute Respiratory Distress Syndrome. *clinicaltrials.gov*. 2020.
- 16
- 17 11. Central Hospital NF. imPROving prenaTal carE During ConfinemenT. *clinicaltrials.gov*.
- 18 2020.
- 19
- 20 12. Central Hospital NF. Obesity and Mortality of Critically Ill Patients With COVID-19.
- 21 *clinicaltrials.gov*. 2020.
- 22
- 23 13. Centre Hospitalier Universitaire de N. Analysis of the Coagulopathy Developed by
- 24 COVID-19 Infected Patients. *clinicaltrials.gov*. 2020.
- 25
- 26 14. Centre Hospitalier Universitaire de Saint E. Prediction of Clinical Course in COVID19
- 27 Patients. *clinicaltrials.gov*. 2020.
- 28
- 29 15. Complejo Hospitalario Universitario de A. Clinical-epidemiological Characterization of
- 30 COVID-19 Disease in Hospitalized Older Adults. *clinicaltrials.gov*. 2020.
- 31
- 32 16. Cyrus E, Clarke R, Hadley D, Bursac Z, Trepka MJ, Devieux JG, et al. The impact of
- 33 COVID-19 on African American communities in the United States. *medRxiv : the preprint server*
- 34 *for health sciences*. 2020.
- 35
- 36 17. Direction Centrale du Service de Santé des A. Study of Clinical and Immune Severity
- 37 Profiles of Patients Infected With SARS-Cov2 (COVID-19). *clinicaltrials.gov*. 2020.
- 38
- 39 18. Federation Francophone de Cancerologie D. The GCO-002 CACOVID-19 Cohort: a
- 40 French Nationwide Multicenter Study of COVID-19 Infected Cancer Patients. *clinicaltrials.gov*.
- 41 2020.
- 42
- 43 19. Federico IU. Clinical Characteristics of Coronavirus Disease 2019 (COVID-19) in
- 44 Pregnancy: The Italian Registry on Coronavirus in Pregnancy. *clinicaltrials.gov*. 2020.
- 45
- 46 20. Fondazione per la Ricerca Ospedale M. Myeloproliferative Neoplasms (MPN) and
- 47 COVID-19. *clinicaltrials.gov*. 2020.
- 48
- 49 21. French Cardiology S. COVID-19 in Cardiology Unit in France : Risk Factors for Mortality
- 50 (CCF). *clinicaltrials.gov*. 2020.
- 51
- 52 22. Fundación Pública Andaluza para la gestión de la Investigación en S. Multicentric Study
- 53 of Coronavirus Disease 2019 (COVID-2019) in Solid Organ Transplant Recipients.
- 54 *clinicaltrials.gov*. 2020.
- 55
- 56
- 57
- 58
- 59
- 60

23. Groupe Hospitalier Paris S-J. A randomized trial of efficacy and safety of an early OUTpatient treatment of COVID-19 in patients with risk factor for poor outcome : a strategy to prevent hospitalization : OUTCOV Study. EU Clinical Trials Register. 2020.
24. Guha A, Bonsu J, Dey A, Addison D. Community and Socioeconomic Factors Associated with COVID-19 in the United States: Zip code level cross sectional analysis. medRxiv : the preprint server for health sciences. 2020.
25. Gustave Roussy CCGP. Epidemiology of SARS-CoV-2 and Mortality to Covid19 Disease in French Cancer Patients. clinicaltrials.gov. 2020.
26. Hamer M, Kivimaki M, Gale CR, Batty GD. Lifestyle Risk Factors for Cardiovascular Disease in Relation to COVID-19 Hospitalization: A Community-Based Cohort Study of 387,109 Adults in UK. medRxiv : the preprint server for health sciences. 2020.
27. Hasselt U. Changes in Cardiac and Pulmonary Hemodynamics as Predictor of Outcome in Hospitalized COVID-19 Patients. clinicaltrials.gov. 2020.
28. Hepatopancreatobiliary Surgery Institute of Gansu P. COVID-19 in Patients With Pre-existing Cirrhosis (COVID-Cirrhosis-CHESS2002): A Multicentre Observational Study. clinicaltrials.gov. 2020.
29. Hospices Civils de L. Prediction of Unfavourable Outcome in Newly Covid-19 Hospitalized Patient. clinicaltrials.gov. 2019.
30. Hospital Clinic of B. COVID-19 in Liver Transplant Recipients. clinicaltrials.gov. 2020.
31. Hospital de M. Prevalence and Risk Factors of SARS-CoV-2 Antibody Responses. clinicaltrials.gov. 2020.
32. Hospital General Universitario Morales M. NIV and CPAP Failure Predictors in COVID-19 Associated Respiratory Failure. clinicaltrials.gov. 2020.
33. Imperial College L. A global registry of women affected by COVID-19 in pregnancy and their babies, to guide treatment and prevention. isrctn.com. 2020.
34. Istituto Auxologico I. Predictors of Cardiovascular Risk in Covid-19 Patients During Acute Disease and at Short Term Follow-up. clinicaltrials.gov. 2020.
35. Istituto Nazionale di Ricovero e Cura per A. Clinical and Biological Predictors of COVID-19 Disease in Older Patients. clinicaltrials.gov. 2020.
36. Jean R, Matthaïos P-O, Raphael B, Paraskevas F, Jonathan T, Florian D, et al. Epidemiology, risk factors and clinical course of SARS-CoV-2 infected patients in a Swiss university hospital: an observational retrospective study. medRxiv. 2020.
37. Jonsson Comprehensive Cancer C. Role of Children in Transmission of COVID-19 to Immunocompromised Patients. clinicaltrials.gov. 2020.
38. Kanuni Sultan Suleyman T, Research H. Prognosis in Pregnant With COVID-19. clinicaltrials.gov. 2020.
39. Kanuni Sultan Suleyman T, Research H. D-dimer Levels in Pregnant With COVID-19. clinicaltrials.gov. 2020.

- 1
- 2
- 3
- 4 40. Karolinska I. Cardiovascular Risk Factors and Severe COVID-19. A Nationwide
- 5 Registry-based Case-Control Study. *clinicaltrials.gov*. 2020.
- 6
- 7 41. Lassale C, Gaye B, Hamer M, Gale CR, Batty GD. Ethnic Disparities in Hospitalization
- 8 for COVID-19: a Community-Based Cohort Study in the UK. *medRxiv : the preprint server for*
- 9 *health sciences*. 2020.
- 10
- 11 42. Lindsay K, Shikha G, Alissa OH, Michael W, Huong P, Evan JA, et al. Interim Analysis of
- 12 Risk Factors for Severe Outcomes among a Cohort of Hospitalized Adults Identified through the
- 13 U.S. Coronavirus Disease 2019 (COVID-19)-Associated Hospitalization Surveillance Network
- 14 (COVID-NET). *medRxiv*. 2020.
- 15
- 16 43. Mario Negri Institute for Pharmacological R. Early CPAP in COVID Patients With
- 17 Respiratory Failure. A Prospective Cohort Study. *clinicaltrials.gov*. 2020.
- 18
- 19 44. Mayo C. Risks of COVID19 in the Pregnant Population. *clinicaltrials.gov*. 2020.
- 20
- 21 45. Millett GA, Jones AT, Benkeser D, Baral S, Mercer L, Beyrer C, et al. Assessing
- 22 Differential Impacts of COVID-19 on Black Communities. *Annals of epidemiology*. 2020.
- 23
- 24 46. National, Kapodistrian University of A. The GReek Study in the Effects of Colchicine in
- 25 Covid-19. *clinicaltrials.gov*. 2020.
- 26
- 27 47. National Research Center for Hematology R. Observational Prospective Cohort Study -
- 28 Registry of Patients With Hematologic Disease and COVID-19 in Russia. *clinicaltrials.gov*. 2020.
- 29
- 30 48. Nayak A, Islam SJ, Mehta A, Ko Y-A, Patel SA, Goyal A, et al. Impact of Social
- 31 Vulnerability on COVID-19 Incidence and Outcomes in the United States. *medRxiv : the preprint*
- 32 *server for health sciences*. 2020.
- 33
- 34 49. Neuromed I. ACE Inhibitors, Angiotensin II Type-I Receptor Blockers and Severity of
- 35 COVID-19. *clinicaltrials.gov*. 2020.
- 36
- 37 50. ObvioHealth. A COVID-19 Symptom, Exposure and Immune Response Registry.
- 38 *clinicaltrials.gov*. 2020.
- 39
- 40 51. Oslo University H. Prospective Quality Register of Patients With Confirmed Covid-19 at
- 41 Oslo University Hospital. *clinicaltrials.gov*. 2020.
- 42
- 43 52. Oslo University H. Risk Factors for Community- and Workplace Transmission of COVID-
- 44 19. *clinicaltrials.gov*. 2020.
- 45
- 46 53. Patricio S, Hiram C. COVID-19 Fatality and Comorbidity Risk Factors among Confirmed
- 47 Patients in Mexico. *medRxiv*. 2020.
- 48
- 49 54. Pitié-Salpêtrière H. Prevalence and Seroconversion of COVID-19 in Autoimmune
- 50 Diseases in Europe. *clinicaltrials.gov*. 2020.
- 51
- 52 55. Pregistry. Health and Wellbeing of Pregnant and Post-Partum Women During the
- 53 COVID-19 Pandemic. *clinicaltrials.gov*. 2020.
- 54
- 55 56. Ramlall V, Thangaraj P, Tatonetti NP, Shapira SD. Identification of Immune complement
- 56 function as a determinant of adverse SARS-CoV-2 infection outcome. *medRxiv : the preprint*
- 57 *server for health sciences*. 2020.
- 58
- 59
- 60

- 1  
2  
3 57. Region V. Observational Cohort Study of Critically Ill Patients With Covid-19 in Sweden. clinicaltrials.gov. 2020.
- 4  
5  
6 58. Rentsch CT, Kidwai-Khan F, Tate JP, Park LS, King JT, Skanderson M, et al. Covid-19  
7 by Race and Ethnicity: A National Cohort Study of 6 Million United States Veterans. medRxiv :  
8 the preprint server for health sciences. 2020.
- 9  
10 59. Rentsch CT, Kidwai-Khan F, Tate JP, Park LS, King JT, Skanderson M, et al. Covid-19  
11 Testing, Hospital Admission, and Intensive Care Among 2,026,227 United States Veterans  
12 Aged 54-75 Years. medRxiv : the preprint server for health sciences. 2020.
- 13  
14 60. Rigshospitalet D. COVID-19 Surveillance of Patients and Healthcare Workers in a  
15 Hospital Department. clinicaltrials.gov. 2020.
- 16  
17 61. Rutgers TSUoNJ. Rutgers COVID-19 Cohort Study. clinicaltrials.gov. 2020.
- 18  
19 62. Spanish Lung Cancer G. LunG canceR pAtients coVId19 Disease (GRAVID).  
20 clinicaltrials.gov. 2020.
- 21  
22 63. St. Jude Children's Research H. Risk Factors, Clinical Characteristics and Outcomes of  
23 Acute Infection With Coronavirus 2019 (COVID-19) In Children. clinicaltrials.gov. 2020.
- 24  
25 64. Szedeg U. Identification of Genetic Factors Determining Disease Course in the New  
26 Type of Coronavirus Infection, COVID-19. clinicaltrials.gov. 2020.
- 27  
28 65. Universidade do P. Quality of Life and Patient-centered Outcomes After UCI Admission  
29 for COVID-19. clinicaltrials.gov. 2020.
- 30  
31 66. University Hospital A. COVID-19 in Hospitalised Norwegian Children - Risk Factors,  
32 Outcomes and Immunology. clinicaltrials.gov. 2020.
- 33  
34 67. University Hospital BS. A Systems Approach to Predict the Outcome of SARS-CoV-2 in  
35 the Population of a City. clinicaltrials.gov. 2020.
- 36  
37 68. University Hospital E. Characterization of Cardiovascular Diseases and Risk Factors in  
38 Patients With Suspected SARS-CoV2/Covid-19 Infection. clinicaltrials.gov. 2020.
- 39  
40 69. University Hospital G. Predict Adverse Events by Covid-19 Nephritis. clinicaltrials.gov.  
41 2020.
- 42  
43 70. University Hospital G. Risk Factors Worsening COVID19 for Out-patient With Home  
44 Monitoring. clinicaltrials.gov. 2020.
- 45  
46 71. University Hospital L. Association Between BMI and SARS-CoV-2. clinicaltrials.gov.  
47 2020.
- 48  
49 72. University Hospital L. Covid-19 in Patients With Chronic Inflammatory Rheumatism,  
50 Auto-immune or Auto-inflammatory Rare and Non-rare Diseases. clinicaltrials.gov. 2020.
- 51  
52 73. University Hospital SF. Solid Organ Transplant Recipients With Covid-19 French  
53 Registry. clinicaltrials.gov. 2020.
- 54  
55 74. University Hospital SF. Study of Hemostasis in Case of Severe COVID-19.  
56 clinicaltrials.gov. 2020.
- 57  
58  
59  
60

- 1
- 2
- 3 75. University Hospital T. Assessment of Obstetric, Fetal and Neonatal Risks and Vertical
- 4 SARS-CoV-2 Transmission During COVID-19 Pandemic. *clinicaltrials.gov*. 2020.
- 5
- 6 76. University Hospital T. Evaluation of the COVID-19 Infection Response in Patients
- 7 Admitted to the Emergency Department for Dyspnea. *clinicaltrials.gov*. 2020.
- 8
- 9 77. University of M. International SARS-CoV-2 (COVID-19) Infection Observational Study.
- 10 *clinicaltrials.gov*. 2020.
- 11
- 12 78. University of M-C. COVID-19 in Patients With HIV. *clinicaltrials.gov*. 2020.
- 13
- 14 79. University of Milano B. Predictive Factors COVID-19 Patients. *clinicaltrials.gov*. 2020.
- 15
- 16 80. University of O. Neonatal Complications of Coronavirus Disease (COVID-19).
- 17 *clinicaltrials.gov*. 2020.
- 18
- 19 81. University of O. UKOSS: Pandemic COVID-19 in pregnancy. *isrctn.com*. 2020.
- 20
- 21 82. University of Sao Paulo General H. Characteristics and Outcomes of Patients With
- 22 COVID-19 Admitted to the ICU. *clinicaltrials.gov*. 2020.
- 23
- 24 83. University of V. Longitudinal COVID-19 Cohort Study. *clinicaltrials.gov*. 2020.
- 25
- 26 84. University of Z. The Global PCHF-COVICAV Registry. *clinicaltrials.gov*. 2020.
- 27
- 28 85. University of Z. SARS-CoV-2 Associated Respiratory Failure Recovery (COVID-19
- 29 CAir). *clinicaltrials.gov*. 2020.
- 30
- 31 86. Uppsala U. COVID-19 in the Swedish ICU-cohort: Risk Factors of Critical Care
- 32 Admission and Intensive Care Mortality. *clinicaltrials.gov*. 2020.
- 33
- 34 87. Utrecht UMC. European Study of Major Infectious Disease Syndromes Related to
- 35 COVID-19. *clinicaltrials.gov*. 2020.
- 36
- 37 88. Vastra Gotaland R. COVID-19 Research in Organ Transplant Recipients.
- 38 *clinicaltrials.gov*. 2020.
- 39
- 40 89. Verily Life Sciences LLC. Predictors of Severe COVID-19 Outcomes. *clinicaltrials.gov*.
- 41 2020.
- 42
- 43 90. Vivek R. Cardiac Arrhythmias In Patients With Coronavirus Disease (COVID-19).
- 44 *clinicaltrials.gov*. 2020.

#### 45 **Excluded – not primary research study (n=175)**

- 46 1. Addeo A, Obeid M, Friedlaender A. COVID-19 and lung cancer: risks, mechanisms and
- 47 treatment interactions. *Journal for immunotherapy of cancer*. 2020;8(1).
- 48
- 49 2. Aggarwal G, Cheruiyot I, Aggarwal S, Wong J, Lippi G, Lavie CJ, et al. Association of
- 50 Cardiovascular Disease With Coronavirus Disease 2019 (COVID-19) Severity: A Meta-Analysis.
- 51 *Current problems in cardiology*. 2020;45(8):100617.
- 52
- 53 3. Aksit E, Kirilmaz B, Gazi E, Aydin F. Ticagrelor Can Be an Important Agent in the
- 54 Treatment of Severe COVID-19 Patients with Myocardial Infarction. *Balkan medical journal*.
- 55 2020;37(4):233-.
- 56
- 57
- 58
- 59
- 60

- 1  
2  
3 4. Alpalhao M, Filipe P. Inpatient care for dermatological patients during SARS-CoV-2 - a  
4 case report from Portugal. *International journal of dermatology*. 2020;59(6):e195.  
5
- 6 5. Ambrosi P. Comment on "Epidemiological and clinical characteristics of heart transplant  
7 recipients during the 2019 coronavirus outbreak in Wuhan, China" by Ren et al. *The Journal of*  
8 *heart and lung transplantation : the official publication of the International Society for Heart*  
9 *Transplantation*. 2020.  
10
- 11 6. Ambrosino I, Barbagelata E, Ortona E, Ruggieri A, Massiah G, Giannico OV, et al.  
12 Gender differences in patients with COVID-19: a narrative review. *Monaldi archives for chest*  
13 *disease = Archivio Monaldi per le malattie del torace*. 2020;90(2).  
14
- 15 7. Andre N, Rouger-Gaudichon J, Brethon B, Phulpin A, Thebault E, Pertuisel S, et al.  
16 COVID-19 in pediatric oncology from French pediatric oncology and hematology centers: High  
17 risk of severe forms? *Pediatric blood & cancer*. 2020;67(7):e28392.  
18
- 19 8. Andrew M, Searle SD, McElhaney JE, McNeil SA, Clarke B, Rockwood K, et al. COVID-  
20 19, frailty and long-term care: Implications for policy and practice. *Journal of infection in*  
21 *developing countries*. 2020;14(5):428-32.  
22
- 23 9. Anonymous. Registries Offer Insights on COVID-19-Cancer Connection. *Cancer*  
24 *discovery*. 2020.  
25
- 26 10. Anonymous. Clinical characteristics of 113 deceased patients with coronavirus disease  
27 2019: retrospective study. *BMJ (Clinical research ed)*. 2020;368:m1295.  
28
- 29 11. Anonymous. Clinical findings in a group of patients infected with the 2019 novel  
30 coronavirus (SARS-Cov-2) outside of Wuhan, China: retrospective case series. *BMJ (Clinical*  
31 *research ed)*. 2020;368:m792.  
32
- 33 12. Anugwom CM, Aby ES, Debes JD. Inverse association between chronic hepatitis B  
34 infection and COVID-19: immune-exhaustion or coincidence? *Clinical infectious diseases : an*  
35 *official publication of the Infectious Diseases Society of America*. 2020.  
36
- 37 13. Arachchillage DRJ, Laffan M. Abnormal coagulation parameters are associated with  
38 poor prognosis in patients with novel coronavirus pneumonia. *Journal of thrombosis and*  
39 *haemostasis : JTH*. 2020;18(5):1233-4.  
40
- 41 14. Archie SR, Cucullo L. Cerebrovascular and Neurological Dysfunction under the Threat of  
42 COVID-19: Is There a Comorbid Role for Smoking and Vaping? *International journal of*  
43 *molecular sciences*. 2020;21(11).  
44
- 45 15. Arnold C. Shielded from harm. *New scientist (1971)*. 2020;246(3281):28-33.  
46
- 47 16. Aydemir D, Ulusu NN. Is glucose-6-phosphate dehydrogenase enzyme deficiency a  
48 factor in Coronavirus-19 (COVID-19) infections and deaths? *Pathogens and global health*.  
49 2020;114(3):109-10.  
50
- 51 17. Baracchini C, Pieroni A, Kneihsl M, Azevedo E, Diomedi M, Pascazio L, et al. Practice  
52 recommendations for the neurovascular ultrasound investigations of acute stroke patients in the  
53 setting of COVID-19 pandemic: an expert consensus from the European Society of  
54 Neurosonology and Cerebral Hemodynamics. *European journal of neurology*. 2020.  
55  
56  
57  
58  
59



18. Barbieri L, Talavera Urquijo E, Parise P, Nilsson M, Reynolds JV, Rosati R. Esophageal oncologic surgery in SARS-CoV-2 (COVID-19) emergency. *Diseases of the esophagus : official journal of the International Society for Diseases of the Esophagus*. 2020;33(5).
19. Barchetta I, Cavallo MG, Baroni MG. COVID-19 and diabetes: Is this association driven by the DPP4 receptor? Potential clinical and therapeutic implications. *Diabetes research and clinical practice*. 2020;163:108165.
20. Bartsch SM, Ferguson MC, McKinnell JA, O'Shea KJ, Wedlock PT, Siegmund SS, et al. The Potential Health Care Costs And Resource Use Associated With COVID-19 In The United States. *Health affairs (Project Hope)*. 2020;39(6):927-35.
21. Bhidayasiri R, Virameteekul S, Kim J-M, Pal PK, Chung S-J. COVID-19: An Early Review of Its Global Impact and Considerations for Parkinson's Disease Patient Care. *Journal of movement disorders*. 2020;13(2):105-14.
22. Bombardini T, Picano E. Angiotensin-Converting Enzyme 2 as the Molecular Bridge Between Epidemiologic and Clinical Features of COVID-19. *The Canadian journal of cardiology*. 2020;36(5):784.e1-e2.
23. Bonow RO, Fonarow GC, O'Gara PT, Yancy CW. Association of Coronavirus Disease 2019 (COVID-19) With Myocardial Injury and Mortality. *JAMA cardiology*. 2020.
24. Bornstein SR, Dalan R, Hopkins D, Mingrone G, Boehm BO. Endocrine and metabolic link to coronavirus infection. *Nature reviews Endocrinology*. 2020;16(6):297-8.
25. Bradbury RS, Piedrafita D, Greenhill A, Mahanty S. Will helminth co-infection modulate COVID-19 severity in endemic regions? *Nature reviews Immunology*. 2020;20(6):342.
26. Brunetti O, Derakhshani A, Baradaran B, Galvano A, Russo A, Silvestris N. COVID-19 Infection in Cancer Patients: How Can Oncologists Deal With These Patients? *Frontiers in oncology*. 2020;10:734.
27. Cafarotti S. Severe Acute Respiratory Syndrome-Coronavirus-2 Infection and Patients With Lung Cancer: The Potential Role of Interleukin-17 Target Therapy. *Journal of thoracic oncology : official publication of the International Association for the Study of Lung Cancer*. 2020.
28. Calvo C, Lopez-Hortelano MG, Vicente JCdC, Martinez JLV, Grupo de trabajo de la Asociacion Espanola de Pediatria para el brote de infeccion por Coronavirus cceMds. Recommendations on the clinical management of the COVID-19 infection by the <> SARS-CoV2. Spanish Paediatric Association working group. *Anales de pediatria*. 2020.
29. Carbillon L, Benbara A, Boujenah J. Clinical course of COVID-19 in patients with systemic lupus erythematosus under long-term treatment with hydroxychloroquine. *Annals of the rheumatic diseases*. 2020.
30. Castagnoli R, Votto M, Licari A, Brambilla I, Bruno R, Perlini S, et al. Severe Acute Respiratory Syndrome Coronavirus 2 (SARS-CoV-2) Infection in Children and Adolescents: A Systematic Review. *JAMA pediatrics*. 2020.

- 1  
2  
3 31. Castro-Rodriguez JA, Forno E. Asthma and COVID-19 in children - a systematic review  
4 and call for data. medRxiv : the preprint server for health sciences. 2020.  
5
- 6 32. Ceriello A, De Nigris V, Prattichizzo F. Why is hyperglycemia worsening COVID-19 and  
7 its prognosis? Diabetes, obesity & metabolism. 2020.  
8
- 9 33. Chaturvedi R, Gabriel RA. COVID-19 Healthcare Delivery Impact on African Americans.  
10 Disaster medicine and public health preparedness. 2020:1-8.  
11
- 12 34. Chen J, Lu H, Melino G, Boccia S, Piacentini M, Ricciardi W, et al. COVID-19 infection:  
13 the China and Italy perspectives. Cell death & disease. 2020;11(6):438.  
14
- 15 35. Chidini G, Villa C, Calderini E, Marchisio P, De Luca D. SARS-CoV-2 Infection in a  
16 Pediatric Department in Milan: A Logistic Rather Than a Clinical Emergency. The Pediatric  
17 infectious disease journal. 2020;39(6):e79-e80.  
18
- 19 36. Chou R, Dana T, Buckley DI, Selph S, Fu R, Totten AM. Update Alert: Epidemiology of  
20 and Risk Factors for Coronavirus Infection in Health Care Workers. Annals of internal medicine.  
21 2020.  
22
- 23 37. Cinti S, Graciotti L, Giordano A, Valerio A, Nisoli E. COVID-19 and fat embolism: a  
24 hypothesis to explain the severe clinical outcome in people with obesity. International journal of  
25 obesity (2005). 2020.  
26
- 27 38. Cole SA, Laviada-Molina HA, Serres-Perales JM, Rodriguez-Ayala E, Bastarrachea RA.  
28 The COVID-19 Pandemic during the Time of the Diabetes Pandemic: Likely Fraternal Twins?  
29 Pathogens (Basel, Switzerland). 2020;9(5).  
30
- 31 39. Colombo C, Burgel P-R, Gartner S, van Koningsbruggen-Rietschel S, Naehrlich L,  
32 Sermet-Gaudelus I, et al. Impact of COVID-19 on people with cystic fibrosis. The Lancet  
33 Respiratory medicine. 2020;8(5):e35-e6.  
34
- 35 40. Cook DJ, Marshall JC, Fowler RA. Critical Illness in Patients With COVID-19: Mounting  
36 an Effective Clinical and Research Response. JAMA. 2020.  
37
- 38 41. Coppel KJ, Hall RM, Downie M, Fraser SK, Garrett M, Jefferies CA, et al. Diabetes and  
39 COVID-19-the meeting of two pandemics: what are the concerns? The New Zealand medical  
40 journal. 2020;133(1514):85-7.  
41
- 42 42. Costa L, Tasso M, Scotti N, Mostacciolo E, Girolimetto N, Foglia F, et al.  
43 Telerheumatology in COVID-19 era: a study from a psoriatic arthritis cohort. Annals of the  
44 rheumatic diseases. 2020.  
45
- 46 43. Cruz AT, Zeichner SL. COVID-19 in Children: Initial Characterization of the Pediatric  
47 Disease. Pediatrics. 2020.  
48
- 49 44. Daccord C, Touilloux B, Von Garnier C. [Asthma and COPD management during the  
50 COVID-19 pandemic]. Prise en charge de l'asthme et de la BPCO en situation de pandémie de  
51 COVID-19. 2020;16(692):933-8.  
52
- 53 45. De Felice F, Polimeni A, Tombolini V. The impact of Coronavirus (COVID-19) on head  
54 and neck cancer patients' care. Radiotherapy and oncology : journal of the European Society for  
55 Therapeutic Radiology and Oncology. 2020;147:84-5.  
56  
57  
58  
59

- 1  
2  
3 46. Delanghe JR, De Buyzere ML, Speeckaert MM. C3 and ACE1 polymorphisms are more  
4 important confounders in the spread and outcome of COVID-19 in comparison with ABO  
5 polymorphism. *European journal of preventive cardiology*. 2020;2047487320931305.  
6  
7 47. Di Lorenzo G, Di Trolio R. Coronavirus Disease (COVID-19) in Italy: Analysis of Risk  
8 Factors and Proposed Remedial Measures. *Frontiers in medicine*. 2020;7:140.  
9  
10 48. Di Stadio A, Ricci G, Greco A, de Vincentiis M, Ralli M. Mortality rate and gender  
11 differences in COVID-19 patients dying in Italy: A comparison with other countries. *European*  
12 *review for medical and pharmacological sciences*. 2020;24(8):4066-7.  
13  
14 49. Dietz W, Santos-Burgoa C. Obesity and its Implications for COVID-19 Mortality. *Obesity*  
15 *(Silver Spring, Md)*. 2020;28(6):1005.  
16  
17 50. Emparan JPO, Sardi-Correa C, López-Ulloa JA, Viteri-Soria J, Penniecook JA, Jimenez-  
18 Román J, et al. COVID-19 and the eye: how much do we really know? A best evidence review.  
19 *Arq Bras Oftalmol*. 2020;83(3):250-61.  
20  
21 51. Extance A. Covid-19 and long term conditions: what if you have cancer, diabetes, or  
22 chronic kidney disease? *BMJ (Clinical research ed)*. 2020;368:m1174.  
23  
24 52. Faconti L, Chowienczyk PJ, Shah AM. Cardiovascular disease, heart failure and COVID-  
25 19. *Journal of the renin-angiotensin-aldosterone system : JRAAS*.  
26 2020;21(2):1470320320926903.  
27  
28 53. Fahd Al-Muhanna A. COVID-19: Impact and challenges at breast imaging unit. *The*  
29 *breast journal*. 2020.  
30  
31 54. Fan BE, Chong VCL, Chan SSW, Lim GH, Lim KGE, Tan GB, et al. Hematologic  
32 parameters in patients with COVID-19 infection. *American journal of hematology*.  
33 2020;95(6):E131-E4.  
34  
35 55. Fan J, Wang H, Ye G, Cao X, Xu X, Tan W, et al. Low-density lipoprotein is a potential  
36 predictor of poor prognosis in patients with coronavirus disease 2019. *Metabolism: clinical and*  
37 *experimental*. 2020:154243.  
38  
39 56. Fruhbeck G, Baker JL, Busetto L, Dicker D, Goossens GH, Halford JCG, et al. European  
40 Association for the Study of Obesity Position Statement on the Global COVID-19 Pandemic.  
41 *Obesity facts*. 2020;13(2):292-6.  
42  
43 57. Gabutti G, d'Anchera E, Sandri F, Savio M, Stefanati A. Coronavirus: Update Related to  
44 the Current Outbreak of COVID-19. *Infectious diseases and therapy*. 2020.  
45  
46 58. George PM, Wells AU, Jenkins RG. Pulmonary fibrosis and COVID-19: the potential role  
47 for antifibrotic therapy. *The Lancet Respiratory medicine*. 2020.  
48  
49 59. Giannakoulis VG, Papoutsis E, Siempos II. Effect of Cancer on Clinical Outcomes of  
50 Patients With COVID-19: A Meta-Analysis of Patient Data. *JCO global oncology*. 2020;6:799-  
51 808.  
52  
53 60. Golemi Minga I, Golemi L, Tafur A, Pursnani A. The Novel Coronavirus Disease  
54 (COVID-19) and Its Impact on Cardiovascular Disease. *Cardiology in review*. 2020;28(4):163-  
55 76.  
56  
57  
58  
59  
60

- 1  
2  
3 61. Goyal P, Choi JJ, Pinheiro LC, Schenck EJ, Chen R, Jabri A, et al. Clinical  
4 Characteristics of Covid-19 in New York City. *The New England journal of medicine*.  
5 2020;382(24):2372-4.  
6  
7 62. Gracia-Ramos AE. Is the ACE2 Overexpression a Risk Factor for COVID-19 Infection?  
8 *Archives of medical research*. 2020;51(4):345-6.  
9  
10 63. Grandi G, Facchinetti F, Bitzer J. The gendered impact of coronavirus disease (COVID-  
11 19): do estrogens play a role? *The European journal of contraception & reproductive health care*  
12 : the official journal of the European Society of Contraception. 2020:1-2.  
13  
14 64. Griffin S. Covid-19: "Staggering number" of extra deaths in community is not explained  
15 by covid-19. *BMJ (Clinical research ed)*. 2020;369:m1931.  
16  
17 65. Hamed E, Abd Elhamid M, Alemrayat B. Suspected cases of COVID-19: study protocol  
18 for reporting characteristics and the outcomes. *Family medicine and community health*.  
19 2020;8(2).  
20  
21 66. Hanff TC, Harhay MO, Brown TS, Cohen JB, Mohareb AM. Is There an Association  
22 Between COVID-19 Mortality and the Renin-Angiotensin System-a Call for Epidemiologic  
23 Investigations. *Clinical infectious diseases : an official publication of the Infectious Diseases*  
24 *Society of America*. 2020.  
25  
26 67. Henry BM, Lippi G. Chronic kidney disease is associated with severe coronavirus  
27 disease 2019 (COVID-19) infection. *International urology and nephrology*. 2020;52(6):1193-4.  
28  
29 68. Hernandez-Huerta D, Alonso-Sanchez EB, Carrajo-Garcia CA, Montes-Rodriguez JM.  
30 The impact of COVID-19 on acute psychiatric inpatient unit. *Psychiatry research*.  
31 2020;290:113107.  
32  
33 69. Huang G, Kovalic AJ, Graber CJ. Prognostic Value of Leukocytosis and Lymphopenia  
34 for Coronavirus Disease Severity. *Emerging infectious diseases*. 2020;26(8).  
35  
36 70. Huang I, Pranata R. Lymphopenia in severe coronavirus disease-2019 (COVID-19):  
37 systematic review and meta-analysis. *Journal of intensive care*. 2020;8:36.  
38  
39 71. Iacobucci G. Covid-19: Care home deaths in England and Wales double in four weeks.  
40 *BMJ (Clinical research ed)*. 2020;369:m1612.  
41  
42 72. Ingravallo F. Death in the era of the COVID-19 pandemic. *The Lancet Public health*.  
43 2020;5(5):e258.  
44  
45 73. Ji Y, Ma Z, Peppelenbosch MP, Pan Q. Potential association between COVID-19  
46 mortality and health-care resource availability. *The Lancet Global health*. 2020;8(4):e480.  
47  
48 74. Jj S, N A, E G. Active smoking and severity of coronavirus disease 2019 (COVID-19):  
49 Differences in measurement of variables could cause errors in the results. *European journal of*  
50 *internal medicine*. 2020.  
51  
52 75. Katulanda P, Dissanayake HA, Ranathunga I, Ratnasamy V, Wijewickrama PSA,  
53 Yogendranathan N, et al. Prevention and management of COVID-19 among patients with  
54 diabetes: an appraisal of the literature. *Diabetologia*. 2020:1-13.  
55  
56  
57  
58  
59  
60

- 1  
2  
3 76. Khalatbari-Soltani S, Cumming RG, Delpierre C, Kelly-Irving M. Importance of collecting  
4 data on socioeconomic determinants from the early stage of the COVID-19 outbreak onwards.  
5 *Journal of epidemiology and community health*. 2020.  
6
- 7 77. Khan S, Jun L, Nawsherwan N, Siddique R, Li Y, Han G, et al. Association of COVID-19  
8 infection with pregnancy outcomes in healthcare workers and general women. *Clinical  
9 microbiology and infection : the official publication of the European Society of Clinical  
10 Microbiology and Infectious Diseases*. 2020;26(6):788-90.  
11
- 12 78. Khan S, Peng L, Siddique R, Nabi G, Nawsherwan N, Xue M, et al. Impact of COVID-19  
13 infection on pregnancy outcomes and the risk of maternal-to-neonatal intrapartum transmission  
14 of COVID-19 during natural birth. *Infection control and hospital epidemiology*. 2020;41(6):1-3.  
15
- 16 79. Khot WY, Nadkar MY. The 2019 Novel Coronavirus Outbreak - A Global Threat. *The  
17 Journal of the Association of Physicians of India*. 2020;68(3):67-71.  
18
- 19 80. Kim DH, Choe YJ, Jeong JY. Understanding and Interpretation of Case Fatality Rate of  
20 Coronavirus Disease 2019. *Journal of Korean medical science*. 2020;35(12):e137.  
21
- 22 81. Kirby T. Efforts escalate to protect homeless people from COVID-19 in UK. *The Lancet  
23 Respiratory medicine*. 2020;8(5):447-9.  
24
- 25 82. Klonoff DC, Umpierrez GE. Letter to the Editor: COVID-19 in patients with diabetes: Risk  
26 factors that increase morbidity. *Metabolism: clinical and experimental*. 2020;108:154224.  
27
- 28 83. Knight A. Letter to the Editor about the Article "Excess Mortality Estimation During the  
29 COVID-19 Pandemic: Preliminary Data from Portugal <https://doi.org/10.20344/amp.13928>". *Acta  
30 medica portuguesa*. 2020;33(6):446-7.  
31
- 32 84. Kollias A, Kyriakoulis KG, Dimakakos E, Poulakou G, Stergiou GS, Syrigos K.  
33 Thromboembolic risk and anticoagulant therapy in COVID-19 patients: emerging evidence and  
34 call for action. *British journal of haematology*. 2020;189(5):846-7.  
35
- 36 85. Konig MF, Gianfrancesco M, Yazdany J, Robinson PC. Patients with systemic lupus  
37 erythematosus using hydroxychloroquine or chloroquine develop severe COVID-19 at similar  
38 frequency as patients not on antimalarials: need to explore antithrombotic benefits for COVID-  
39 19 coagulopathy. Response to: 'Clinical course of COVID-19 in patients with systemic lupus  
40 erythematosus under long-term treatment with hydroxychloroquine' by Carbillon et al. *Annals of  
41 the rheumatic diseases*. 2020.  
42
- 43 86. Kosinski C, Zanchi A, Wojtusciszyn A. [Diabetes and COVID-19 infection]. *Diabete et  
44 infection a COVID-19*. 2020;16(692):939-43.  
45
- 46 87. Kreutz R, Algharably EAE-H, Azizi M, Dobrowolski P, Guzik T, Januszewicz A, et al.  
47 Hypertension, the renin-angiotensin system, and the risk of lower respiratory tract infections and  
48 lung injury: implications for COVID-19. *Cardiovascular research*. 2020.  
49
- 50 88. Kulkarni RK, Kinikar AA, Chandanwale A. Impact of COVID-19 on Children and  
51 Pediatricians. *Indian pediatrics*. 2020;57(5):480-1.  
52
- 53 89. Kulkarni S, Jenner BL, Wilkinson I. COVID-19 and hypertension. *Journal of the renin-  
54 angiotensin-aldosterone system : JRAAS*. 2020;21(2):1470320320927851.  
55  
56  
57

- 1  
2  
3 90. Lapolla P, Mingoli A, Lee R. Deaths from COVID-19 in healthcare workers in Italy-What  
4 can we learn? *Infection control and hospital epidemiology*. 2020:1-2.  
5
- 6 91. Laster Pirtle WN. Racial Capitalism: A Fundamental Cause of Novel Coronavirus  
7 (COVID-19) Pandemic Inequities in the United States. *Health education & behavior* : the official  
8 publication of the Society for Public Health Education. 2020:1090198120922942.  
9
- 10 92. Lee H, Miller VJ. The Disproportionate Impact of COVID-19 on Minority Groups: A Social  
11 Justice Concern. *Journal of gerontological social work*. 2020:1-5.  
12
- 13 93. Lee PI, Hu YL, Chen PY, Huang YC, Hsueh PR. Are children less susceptible to COVID-  
14 19? *Journal of microbiology, immunology, and infection = Wei mian yu gan ran za zhi*. 2020.  
15
- 16 94. Lee YJ. The Impact of the COVID-19 Pandemic on Vulnerable Older Adults in the United  
17 States. *Journal of gerontological social work*. 2020:1-6.  
18
- 19 95. Leung JM, Yang CX, Sin DD. Reply to: "Current smoking is not associated with COVID-  
20 19". *The European respiratory journal*. 2020;55(6).  
21
- 22 96. Liguoro I, Pilotto C, Bonanni M, Ferrari ME, Pusiolo A, Nocerino A, et al. SARS-COV-2  
23 infection in children and newborns: a systematic review. *European journal of pediatrics*. 2020.  
24
- 25 97. Lillicrap D. Disseminated intravascular coagulation in patients with 2019-nCoV  
26 pneumonia. *Journal of thrombosis and haemostasis* : JTH. 2020;18(4):786-7.  
27
- 28 98. Lippi G, Favaloro EJ. D-dimer is Associated with Severity of Coronavirus Disease 2019:  
29 A Pooled Analysis. *Thrombosis and haemostasis*. 2020;120(5):876-8.  
30
- 31 99. Lippi G, Mattiuzzi C. Hemoglobin value may be decreased in patients with severe  
32 coronavirus disease 2019. *Hematology, transfusion and cell therapy*. 2020;42(2):116-7.  
33
- 34 100. Lippi G, Wong J, Henry BM. Myalgia may not be associated with severity of coronavirus  
35 disease 2019 (COVID-19). *World journal of emergency medicine*. 2020;11(3):193-4.  
36
- 37 101. Liu Y, Chen H, Tang K, Guo Y. Clinical manifestations and outcome of SARS-CoV-2  
38 infection during pregnancy. *The Journal of infection*. 2020.  
39
- 40 102. Liu Z, Long W, Tu M, Chen S, Huang Y, Wang S, et al. Lymphocyte subset (CD4+,  
41 CD8+) counts reflect the severity of infection and predict the clinical outcomes in patients with  
42 COVID-19. *The Journal of infection*. 2020.  
43
- 44 103. Lu X, Zhang L, Du H, Zhang J, Li YY, Qu J, et al. SARS-CoV-2 Infection in Children. *The*  
45 *New England journal of medicine*. 2020;382(17):1663-5.  
46
- 47 104. Madjid M, Safavi-Naeini P, Solomon SD, Vardeny O. Potential Effects of Coronaviruses  
48 on the Cardiovascular System: A Review. *JAMA cardiology*. 2020.  
49
- 50 105. Magrone T, Magrone M, Jirillo E. Focus on Receptors for Coronaviruses with Special  
51 Reference to Angiotensin-converting Enzyme 2 as a Potential Drug Target - A Perspective.  
52 *Endocrine, metabolic & immune disorders drug targets*. 2020.  
53
- 54 106. Mahase E. Covid-19: death rate is 0.66% and increases with age, study estimates. *BMJ*  
55 (Clinical research ed). 2020;369:m1327.  
56  
57  
58  
59  
60

- 1  
2  
3 107. Malard F, Mohty M. Management of patients with multiple myeloma during the COVID-  
4 19 pandemic. *The Lancet Haematology*. 2020;7(6):e435-e7.  
5  
6 108. Mansur JL. Letter: low population mortality from COVID-19 in countries south of latitude  
7 35 degrees North supports vitamin D as a factor determining severity. *Alimentary pharmacology*  
8 & therapeutics. 2020.  
9  
10 109. Marongiu F, Grandone E, Barcellona D. Pulmonary thrombosis in 2019-nCoV  
11 pneumonia? *Journal of thrombosis and haemostasis : JTH*. 2020;18(6):1511-3.  
12  
13 110. McGonagle D, Plein S, O'Donnell JS, Sharif K, Bridgewood C. Increased cardiovascular  
14 mortality in African Americans with COVID-19. *The Lancet Respiratory medicine*. 2020.  
15  
16 111. McSharry D, Malhotra A. Potential influences of obstructive sleep apnea and obesity on  
17 COVID-19 severity. *Journal of clinical sleep medicine : JCSM : official publication of the*  
18 *American Academy of Sleep Medicine*. 2020.  
19  
20 112. Memtsoudis SG, Ivascu NS, Pryor KO, Goldstein PA. Obesity as a risk factor for poor  
21 outcome in COVID-19-induced lung injury: the potential role of undiagnosed obstructive sleep  
22 apnoea. *British journal of anaesthesia*. 2020.  
23  
24 113. Meo SA, Alhowikan AM, Al-Khlaiwi T, Meo IM, Halepoto DM, Iqbal M, et al. Novel  
25 coronavirus 2019-nCoV: prevalence, biological and clinical characteristics comparison with  
26 SARS-CoV and MERS-CoV. *European review for medical and pharmacological sciences*.  
27 2020;24(4):2012-9.  
28  
29 114. Miller R, Englund K. Transmission and risk factors of OF COVID-19. *Cleveland Clinic*  
30 *journal of medicine*. 2020.  
31  
32 115. Mills JP, Kaye KS, Mody L. COVID-19 in older adults: clinical, psychosocial, and public  
33 health considerations. *JCI insight*. 2020;5(10).  
34  
35 116. Mueller AL, McNamara MS, Sinclair DA. Why does COVID-19 disproportionately affect  
36 older people? *Aging*. 2020;12(10):9959-81.  
37  
38 117. Muhidin S, Behboodi Moghadam Z, Vizheh M. Analysis of Maternal Coronavirus  
39 Infections and Neonates Born to Mothers with 2019-nCoV; a Systematic Review. *Archives of*  
40 *academic emergency medicine*. 2020;8(1):e49.  
41  
42 118. Muurlink OT, Taylor-Robinson AW. COVID-19: Cultural Predictors of Gender Differences  
43 in Global Prevalence Patterns. *Frontiers in public health*. 2020;8:174.  
44  
45 119. Nguyen A, David JK, Maden SK, Wood MA, Weeder BR, Nellore A, et al. Human  
46 leukocyte antigen susceptibility map for SARS-CoV-2. *Journal of virology*. 2020.  
47  
48 120. Nikpour M, Teh B, Wicks IP, Pellegrini M. Correspondence regarding research letter to  
49 the editor by Mathian et al, 'Clinical course of coronavirus disease 2019 (COVID-19) in a series  
50 of 17 patients with systemic lupus under long-term treatment with hydroxychloroquine'. *Annals*  
51 *of the rheumatic diseases*. 2020.  
52  
53 121. Osman MS, van Eeden C, Cohen Tervaert JW. Fatal COVID-19 infections: Is NK cell  
54 dysfunction a link with autoimmune HLH? *Autoimmunity reviews*. 2020;19(7):102561.  
55  
56  
57  
58  
59

- 1  
2  
3 122. Pal R. COVID-19, hypothalamo-pituitary-adrenal axis and clinical implications.  
4 Endocrine. 2020;68(2):251-2.  
5
- 6 123. Palmieri C, Palmer D, Openshaw PJ, Baille JK, Semple MG, Turtle L. Cancer datasets  
7 and the SARS-CoV-2 pandemic: establishing principles for collaboration. ESMO open.  
8 2020;5(3).  
9
- 10 124. Pantos C, Tseti I, Mourouzis I. Use of triiodothyronine to treat critically ill COVID-19  
11 patients: a new clinical trial. Critical care (London, England). 2020;24(1):209.  
12
- 13 125. Papa SM, Brundin P, Fung VSC, Kang UJ, Burn DJ, Colosimo C, et al. Impact of the  
14 COVID-19 Pandemic on Parkinson's Disease and Movement Disorders. Movement disorders  
15 clinical practice. 2020;7(4):357-60.  
16
- 17 126. Patanavanich R, Glantz SA. Smoking is Associated with COVID-19 Progression: A  
18 Meta-Analysis. medRxiv : the preprint server for health sciences. 2020.  
19
- 20 127. Pawlotsky J-M. COVID-19 and the liver-related deaths to come. Nature reviews  
21 Gastroenterology & hepatology. 2020.  
22
- 23 128. Pitocco D, Tartaglione L, Viti L, Di Leo M, Pontecorvi A, Caputo S. SARS-CoV-2 and  
24 DPP4 inhibition: Is it time to pray for Janus Bifrons? Diabetes research and clinical practice.  
25 2020;163:108162.  
26
- 27 129. Porcheddu R, Serra C, Kelvin D, Kelvin N, Rubino S. Similarity in Case Fatality Rates  
28 (CFR) of COVID-19/SARS-COV-2 in Italy and China. Journal of infection in developing  
29 countries. 2020;14(2):125-8.  
30
- 31 130. Post A, Dullaart RPF, Bakker SJL. Is low sodium intake a risk factor for severe and fatal  
32 COVID-19 infection? European journal of internal medicine. 2020;75:109.  
33
- 34 131. Poston JT, Patel BK, Davis AM. Management of Critically Ill Adults With COVID-19.  
35 JAMA. 2020.  
36
- 37 132. Preskorn SH. The 5% of the Population at High Risk for Severe COVID-19 Infection Is  
38 Identifiable and Needs to Be Taken Into Account When Reopening the Economy. Journal of  
39 psychiatric practice. 2020;26(3):219-27.  
40
- 41 133. Printza A, Constantinidis J. The role of self-reported smell and taste disorders in  
42 suspected COVID-19. Eur Arch Otorhinolaryngol. 2020:1-6.  
43
- 44 134. Ramasamy R, Milne K, Bell D, Stoneham S, Chevassut T. Molecular mechanisms for  
45 thrombosis risk in Black people: a role in excess mortality from COVID-19. British journal of  
46 haematology. 2020.  
47
- 48 135. Raymond E, Thieblemont C, Alran S, Faivre S. Impact of the COVID-19 Outbreak on the  
49 Management of Patients with Cancer. Targeted oncology. 2020;15(3):249-59.  
50
- 51 136. Rhodes JM, Subramanian S, Laird E, Kenny RA. Letter: low population mortality from  
52 COVID-19 in countries south of latitude 35degree North supports vitamin D as a factor  
53 determining severity-authors' reply. Alimentary pharmacology & therapeutics. 2020.  
54  
55  
56  
57  
58  
59  
60



- 1  
2  
3 137. Rocha JC, Calhau C, MacDonald A. Reply to Jakovac; Severity of COVID-19 infection in  
4 patients with phenylketonuria: is vitamin D status protective? *American journal of physiology*  
5 *Endocrinology and metabolism*. 2020;318(6):E890-E1.  
6  
7 138. Roncon L, Zuin M, Zonzin P. Age-adjusted D-dimer cut-off levels to rule out venous  
8 thromboembolism in COVID-19 patients. *Thrombosis research*. 2020;190:102.  
9  
10 139. Roncon L, Zuin M, Zuliani G, Rigatelli G. Patients with arterial hypertension and COVID-  
11 19 are at higher risk of ICU admission. *British journal of anaesthesia*. 2020.  
12  
13 140. Rosen RJ. Thrombotic complications in critically ill patients with COVID 19. *Thrombosis*  
14 *research*. 2020;191:56.  
15  
16 141. Rossato M, Russo L, Mazzocut S, Di Vincenzo A, Fioretto P, Vettor R. Current smoking  
17 is not associated with COVID-19. *The European respiratory journal*. 2020;55(6).  
18  
19 142. Salemi JL, Menard J, Pathak EB. Estimating severe and critical illness in children with  
20 COVID-19. *Early human development*. 2020;144:105052.  
21  
22 143. Sattar N, McInnes IB, McMurray JJV. Obesity a Risk Factor for Severe COVID-19  
23 Infection: Multiple Potential Mechanisms. *Circulation*. 2020.  
24  
25 144. Schwartz DA. The Effects of Pregnancy on Women with COVID-19: Maternal and Infant  
26 Outcomes. *Clinical infectious diseases : an official publication of the Infectious Diseases Society*  
27 *of America*. 2020.  
28  
29 145. Selvan ME. Risk factors for death from COVID-19. *Nature reviews Immunology*. 2020.  
30  
31 146. Senni M. COVID-19 experience in Bergamo, Italy. *European heart journal*.  
32 2020;41(19):1783-4.  
33  
34 147. Shah GH, Shankar P, Schwind JS, Sittaramane V. The Detrimental Impact of the  
35 COVID-19 Crisis on Health Equity and Social Determinants of Health. *Journal of public health*  
36 *management and practice : JPHMP*. 2020;26(4):317-9.  
37  
38 148. Shah M, Sachdeva M, Dodiuk-Gad RP. The impact of hydroxychloroquine shortages on  
39 patients with dermatological conditions during COVID-19 pandemic. *Dermatologic therapy*.  
40 2020:e13524.  
41  
42 149. Sharma G, Volgman AS, Michos ED. Sex Differences in Mortality from COVID-19  
43 Pandemic: Are Men Vulnerable and Women Protected? *JACC Case reports*. 2020.  
44  
45 150. Sinha IP, Harwood R, Semple MG, Hawcutt DB, Thursfield R, Narayan O, et al. COVID-  
46 19 infection in children. *The Lancet Respiratory medicine*. 2020;8(5):446-7.  
47  
48 151. Skarstein Kolberg E. ACE2, COVID19 and serum ACE as a possible biomarker to  
49 predict severity of disease. *Journal of clinical virology : the official publication of the Pan*  
50 *American Society for Clinical Virology*. 2020;126:104350.  
51  
52 152. Sommerstein R, Kochen MM, Messerli FH, Grani C. Coronavirus Disease 2019 (COVID-  
53 19): Do Angiotensin-Converting Enzyme Inhibitors/Angiotensin Receptor Blockers Have a  
54 Biphasic Effect? *Journal of the American Heart Association*. 2020;9(7):e016509.  
55  
56  
57  
58  
59  
60

- 1  
2  
3 153. Soraya GV, Ulhaq ZS. Interleukin-6 levels in children developing SARS-CoV-2 infection. *Pediatrics and neonatology*. 2020;61(3):253-4.  
4  
5  
6 154. Souch JM, Cossman JS. A Commentary on Rural-Urban Disparities in COVID-19  
7 Testing Rates per 100,000 and Risk Factors. *The Journal of rural health : official journal of the*  
8 *American Rural Health Association and the National Rural Health Care Association*. 2020.  
9  
10 155. Stafford N. Covid-19: Why Germany's case fatality rate seems so low. *BMJ (Clinical*  
11 *research ed)*. 2020;369:m1395.  
12  
13 156. Sundaram M, Ravikumar N, Bansal A, Nallasamy K, Basavaraja GV, Lodha R, et al.  
14 Novel Coronavirus 2019 (2019-nCoV) Infection: Part II - Respiratory Support in the Pediatric  
15 Intensive Care Unit in Resource-limited Settings. *Indian pediatrics*. 2020;57(4):335-42.  
16  
17 157. Tan L, Wang Q, Zhang D, Ding J, Huang Q, Tang Y-Q, et al. Correction: Lymphopenia  
18 predicts disease severity of COVID-19: a descriptive and predictive study. *Signal transduction*  
19 *and targeted therapy*. 2020;5:61.  
20  
21 158. Tan L, Wang Q, Zhang D, Ding J, Huang Q, Tang YQ, et al. Lymphopenia predicts  
22 disease severity of COVID-19: a descriptive and predictive study. *Signal transduction and*  
23 *targeted therapy*. 2020;5(1):33.  
24  
25 159. Tapia-Orihuela RKA. Hypertension and coronavirus disease 2019 mortality. *Journal of*  
26 *hypertension*. 2020;38(6):1197-8.  
27  
28 160. Taub JW, Ge Y, Xavier AC. COVID-19 and childhood acute lymphoblastic leukemia.  
29 *Pediatric blood & cancer*. 2020;67(7):e28400.  
30  
31 161. Temgoua MN, Kuate LM, Ngatchou W, Sibetcheu A, Toupendi ZN, Belobo G, et al.  
32 COVID-19 pandemic: do we need systematic screening of patients with cardiovascular risk  
33 factors in Low and Middle-Income Countries (LMICs) for preventing death? *The Pan African*  
34 *medical journal*. 2020;35(Suppl 2):11.  
35  
36 162. Tolksdorf K, Buda S, Schuler E, Wieler LH, Haas W. Influenza-associated pneumonia as  
37 reference to assess seriousness of coronavirus disease (COVID-19). *Euro surveillance : bulletin*  
38 *Europeen sur les maladies transmissibles = European communicable disease bulletin*.  
39 2020;25(11).  
40  
41 163. University Hospital BS. Amotosalen-Ultraviolet A Pathogen-Inactivated Convalescent  
42 Plasma in Addition to Best Supportive Care and Antiviral Therapy on Clinical Deterioration in  
43 Adults Presenting With Moderate to Severe COVID-19. *clinicaltrials.gov*. 2020.  
44  
45 164. van Nieuwkoop C. COVID-19 associated pulmonary thrombosis. *Thrombosis research*.  
46 2020;191:151.  
47  
48 165. Vankadari N, Wilce JA. Emerging WuHan (COVID-19) coronavirus: glycan shield and  
49 structure prediction of spike glycoprotein and its interaction with human CD26. *Emerging*  
50 *microbes & infections*. 2020;9(1):601-4.  
51  
52 166. Vazquez JC, Redolar-Ripoll D. COVID-19 outbreak impact in Spain: A role for tobacco  
53 smoking? *Tobacco induced diseases*. 2020;18:30.  
54  
55  
56  
57  
58  
59  
60

- 1  
2  
3 167. Venkatesulu BP, Chandrasekar VT, Girdhar P, Advani P, Sharma A, Elumalai T, et al. A  
4 systematic review and meta-analysis of cancer patients affected by a novel coronavirus.  
5 medRxiv : the preprint server for health sciences. 2020.  
6
- 7 168. Wise J. Covid-19: Known risk factors fail to explain the increased risk of death among  
8 people from ethnic minorities. *BMJ (Clinical research ed)*. 2020;369:m1873.  
9
- 10 169. Xu G, Yang Y, Du Y, Peng F, Hu P, Wang R, et al. Clinical Pathway for Early Diagnosis  
11 of COVID-19: Updates from Experience to Evidence-Based Practice. *Clinical reviews in allergy  
12 & immunology*. 2020.  
13
- 14 170. Yagnik PJ, Umscheid J, Khan AW, Ali M, Bhatt P, Desai PH. Pediatric Characteristics of  
15 2019 Novel Coronavirus: Review of Available Published Literature. *Clinical pediatrics*.  
16 2020:9922820920017.  
17
- 18 171. Yahya AS, Khawaja S, Chukwuma J. Association of COVID-19 With Intimate Partner  
19 Violence. The primary care companion for CNS disorders. 2020;22(3).  
20
- 21 172. Yan F, Nguyen SA. Head and neck cancer: high-risk population for COVID-19. *Head &  
22 neck*. 2020;42(6):1150-2.  
23
- 24 173. Yaya S, Yeboah H, Charles CH, Otu A, Labonte R. Ethnic and racial disparities in  
25 COVID-19-related deaths: counting the trees, hiding the forest. *BMJ global health*. 2020;5(6).  
26
- 27 174. Zambrano LI, Fuentes-Barahona IC, Bejarano-Torres DA, Bustillo C, Gonzales G,  
28 Vallecillo-Chinchilla G, et al. A pregnant woman with COVID-19 in Central America. *Travel  
29 medicine and infectious disease*. 2020:101639.  
30
- 31 175. Zumla A, Hui DS, Azhar EI, Memish ZA, Maeurer M. Reducing mortality from 2019-  
32 nCoV: host-directed therapies should be an option. *Lancet (London, England)*.  
33 2020;395(10224):e35-e6.  
34

#### 35 **Excluded – sample size <10 (n=62)**

- 36
- 37 1. Arpali E, Akyollu B, Yelken B, Tekin S, Turkmen A, Kocak B. Case report: A kidney  
38 transplant patient with mild COVID-19. *Transplant infectious disease : an official journal of the  
39 Transplantation Society*. 2020:e13296.  
40
- 41 2. Banerjee D, Popoola J, Shah S, Ster IC, Quan V, Phanish M. COVID-19 infection in  
42 kidney transplant recipients. *Kidney international*. 2020;97(6):1076-82.  
43
- 44 3. Benger M, Williams O, Siddiqui J, Sztrihla L. Intracerebral haemorrhage (ICH) and  
45 COVID-19: Clinical characteristics from a case series. *Brain, behavior, and immunity*. 2020.  
46
- 47 4. Beyrouti R, Adams ME, Benjamin L, Cohen H, Farmer SF, Goh YY, et al. Characteristics  
48 of ischaemic stroke associated with COVID-19. *Journal of neurology, neurosurgery, and  
49 psychiatry*. 2020.  
50
- 51 5. Bhoori S, Rossi RE, Citterio D, Mazzaferro V. COVID-19 in long-term liver transplant  
52 patients: preliminary experience from an Italian transplant centre in Lombardy. *The lancet  
53 Gastroenterology & hepatology*. 2020;5(6):532-3.  
54  
55  
56  
57  
58  
59  
60

6. Blanco JL, Ambrosioni J, Garcia F, Martinez E, Soriano A, Mallolas J, et al. COVID-19 in patients with HIV: clinical case series. *The lancet HIV*. 2020;7(5):e314-e6.
7. Blondiaux E, Parisot P, Redheuil A, Tzaroukian L, Levy Y, Sileo C, et al. Cardiac MRI of Children with Multisystem Inflammatory Syndrome (MIS-C) Associated with COVID-19: Case Series. *Radiology*. 2020:202288.
8. Bossoni S, Chiesa L, Giustina A. Severe hypocalcemia in a thyroidectomized woman with Covid-19 infection. *Endocrine*. 2020;68(2):253-4.
9. Bowen JD, Brink J, Brown TR, Lucassen EB, Smoot K, Wundes A, et al. COVID-19 in MS: Initial observations from the Pacific Northwest. *Neurology(R) neuroimmunology & neuroinflammation*. 2020;7(5).
10. Chiarini M, Paghera S, Moratto D, Rossi ND, Giacomelli M, Badolato R, et al. Immunologic characterization of a immunosuppressed multiple sclerosis patient that recovered from SARS-CoV-2 infection. *Journal of neuroimmunology*. 2020;345:577282.
11. Climent FJ, Calvo C, Garcia-Guereta L, Rodriguez-Alvarez D, Buitrago NM, Perez-Martinez A. Fatal outcome of COVID-19 disease in a 5-month infant with comorbidities. *Revista espanola de cardiologia (English ed)*. 2020.
12. Codispoti CD, Bandi S, Patel P, Mahdavinia M. Clinical course of asthma in 4 cases of coronavirus disease 2019 infection. *Annals of allergy, asthma & immunology : official publication of the American College of Allergy, Asthma, & Immunology*. 2020.
13. Cozzi E, Faccioli E, Marinello S, Loy M, Congedi S, Calabrese F, et al. COVID-19 pneumonia in lung transplant recipients: report of two cases. *American journal of transplantation : official journal of the American Society of Transplantation and the American Society of Transplant Surgeons*. 2020.
14. Creel-Bulos C, Hockstein M, Amin N, Melhem S, Truong A, Sharifpour M. Acute Cor Pulmonale in Critically Ill Patients with Covid-19. *The New England journal of medicine*. 2020;382(21):e70.
15. Cui Y, Tian M, Huang D, Wang X, Huang Y, Fan L, et al. A 55-Day-Old Female Infant infected with COVID 19: presenting with pneumonia, liver injury, and heart damage. *The Journal of infectious diseases*. 2020;221(11):1775-81.
16. Dabbagh MF, Aurora L, D'Souza P, Weinmann AJ, Bhargava P, Basir MB. Cardiac Tamponade Secondary to COVID-19. *JACC Case reports*. 2020.
17. Danzi GB, Loffi M, Galeazzi G, Gherbesi E. Acute pulmonary embolism and COVID-19 pneumonia: a random association? *European heart journal*. 2020;41(19):1858.
18. Dong L, Tian J, He S, Zhu C, Wang J, Liu C, et al. Possible Vertical Transmission of SARS-CoV-2 From an Infected Mother to Her Newborn. *JAMA*. 2020:E1-E3.
19. Escher R, Breakey N, Lammle B. Severe COVID-19 infection associated with endothelial activation. *Thrombosis research*. 2020;190:62.
20. Fontana F, Alfano G, Mori G, Amurri A, Tei L, Ballestri M, et al. COVID-19 pneumonia in a kidney transplant recipient successfully treated with tocilizumab and hydroxychloroquine.

1  
2  
3 American journal of transplantation : official journal of the American Society of Transplantation  
4 and the American Society of Transplant Surgeons. 2020.  
5

6 21. Garcia-Salido A, Leoz-Gordillo I, Martinez de Azagra-Garde A, Nieto-Moro M, Iglesias-  
7 Bouzas MI, Garcia-Teresa MA, et al. Children in Critical Care Due to Severe Acute Respiratory  
8 Syndrome Coronavirus 2 Infection: Experience in a Spanish Hospital. *Pediatric critical care*  
9 *medicine : a journal of the Society of Critical Care Medicine and the World Federation of*  
10 *Pediatric Intensive and Critical Care Societies.* 2020.  
11

12 22. Gautier-Vargas G, Baldacini C, Benotmane I, Keller N, Perrin P, Moulin B, et al. Rapid  
13 resolution of cytokine release syndrome and favorable clinical course of severe COVID-19 in a  
14 kidney transplant recipient treated with tocilizumab. *Kidney international.* 2020.  
15

16 23. Gayam V, Konala VM, Naramala S, Garlapati PR, Merghani MA, Regmi N, et al.  
17 Presenting characteristics, comorbidities, and outcomes of patients coinfecting with COVID-19  
18 and *Mycoplasma pneumoniae* in the USA. *Journal of medical virology.* 2020.  
19

20 24. Govind A, Essien S, Karthikeyan A, Fakokunde A, Janga D, Yoong W, et al. Re: Novel  
21 Coronavirus COVID-19 in late pregnancy: Outcomes of first nine cases in an inner city London  
22 hospital. *European journal of obstetrics, gynecology, and reproductive biology.* 2020.  
23

24 25. Hadi A, Werge M, Kristiansen KT, Pedersen UG, Karstensen JG, Novovic S, et al.  
25 Coronavirus Disease-19 (COVID-19) associated with severe acute pancreatitis: Case report on  
26 three family members. *Pancreatology : official journal of the International Association of*  
27 *Pancreatology (IAP) [et al].* 2020;20(4):665-7.  
28

29 26. Hammami MB, Garibaldi B, Shah P, Liu G, Jain T, Chen P-H, et al. Clinical course of  
30 COVID-19 in a liver transplant recipient on hemodialysis and response to tocilizumab therapy: A  
31 case report. *American journal of transplantation : official journal of the American Society of*  
32 *Transplantation and the American Society of Transplant Surgeons.* 2020.  
33

34 27. He G, Wu J, Shi J, Dai J, Gamber M, Jiang X, et al. COVID-19 in Tuberculosis patients:  
35 a report of three cases. *Journal of medical virology.* 2020.  
36

37 28. Hong L, Smith N, Keerthy M, Lee-Griffith M, Garcia R, Shaman M, et al. Severe COVID-  
38 19 infection in pregnancy requiring intubation without preterm delivery: A case report. *Case*  
39 *reports in women's health.* 2020;27:e00217.  
40

41 29. Hsu JJ, Gaynor P, Kamath M, Fan A, Al-Saffar F, Cruz D, et al. COVID-19 in a High-  
42 Risk Dual Heart and Kidney Transplant Recipient. *American journal of transplantation : official*  
43 *journal of the American Society of Transplantation and the American Society of Transplant*  
44 *Surgeons.* 2020.  
45

46 30. Inciardi RM, Lupi L, Zaccone G, Italia L, Raffo M, Tomasoni D, et al. Cardiac  
47 Involvement in a Patient With Coronavirus Disease 2019 (COVID-19). *JAMA cardiology.* 2020.  
48

49 31. Jasinowodolinski D, Filisbino MM, Baldi BG. COVID-19 pneumonia: a risk factor for  
50 pulmonary thromboembolism? *Jornal brasileiro de pneumologia : publicacao oficial da*  
51 *Sociedade Brasileira de Pneumologia e Tisiologia.* 2020;46(4):e20200168.  
52  
53  
54  
55  
56  
57  
58  
59  
60

- 1  
2  
3 32. Juusela A, Nazir M, Gimovsky M. Two cases of coronavirus 2019-related  
4 cardiomyopathy in pregnancy. *American journal of obstetrics & gynecology* MFM.  
5 2020;2(2):100113.  
6
- 7 33. Karami P, Naghavi M, Feyzi A, Aghamohammadi M, Novin MS, Mobaien A, et al.  
8 Mortality of a pregnant patient diagnosed with COVID-19: A case report with clinical,  
9 radiological, and histopathological findings. *Travel medicine and infectious disease*.  
10 2020:101665.  
11
- 12 34. Kim Y, Kwon O, Paek JH, Park WY, Jin K, Hyun M, et al. Two distinct cases with  
13 COVID-19 in kidney transplant recipients. *American journal of transplantation : official journal of*  
14 *the American Society of Transplantation and the American Society of Transplant Surgeons*.  
15 2020.  
16
- 17 35. Kirienko M, Padovano B, Serafini G, Marchiano A, Gronchi A, Seregini E, et al. CT,  
18 [18F]FDG-PET/CT and clinical findings before and during early Covid-19 onset in a patient  
19 affected by vascular tumour. *European journal of nuclear medicine and molecular imaging*.  
20 2020;47(7):1769-70.  
21
- 22 36. Konopka KE, Wilson A, Myers JL. Postmortem Lung Findings in an Asthmatic Patient  
23 With Coronavirus Disease 2019. *Chest*. 2020.  
24
- 25 37. Mariano RZ, Ramos MdC, Reis F. COVID-19 and pulmonary embolism: Do not forget  
26 the association! *Revista da Sociedade Brasileira de Medicina Tropical*. 2020;53:e20200234.  
27
- 28 38. Mehta H, Ivanovic S, Cronin A, VanBrunt L, Mistry N, Miller R, et al. Novel coronavirus-  
29 related acute respiratory distress syndrome in a patient with twin pregnancy: A case report.  
30 *Case reports in women's health*. 2020:e00220.  
31
- 32 39. Merli M, Perricone G, Lauterio A, Prosperi M, Travi G, Roselli E, et al. Reply to  
33 "Coronaviruses and immunosuppressed patients. The facts during the third epidemic". *Liver*  
34 *transplantation : official publication of the American Association for the Study of Liver Diseases*  
35 *and the International Liver Transplantation Society*. 2020.  
36
- 37 40. Modi AR, Koval CE, Taege AJ, Modaresi Esfeh J, Eghtesad B, Menon KVN, et al.  
38 Coronavirus Disease 2019 in an Orthotopic Liver Transplant Recipient Living with Human  
39 Immunodeficiency Virus. *Transplant infectious disease : an official journal of the Transplantation*  
40 *Society*. 2020:e13351.  
41
- 42 41. Monti S, Balduzzi S, Delvino P, Bellis E, Quadrelli VS, Montecucco C. Clinical course of  
43 COVID-19 in a series of patients with chronic arthritis treated with immunosuppressive targeted  
44 therapies. *Annals of the rheumatic diseases*. 2020;79(5):667-8.  
45
- 46 42. Morlacchi LC, Rossetti V, Gigli L, Amati F, Rosso L, Aliberti S, et al. COVID-19 In Lung  
47 Transplant Recipients: A Case Series From Milan, Italy. *Transplant infectious disease : an*  
48 *official journal of the Transplantation Society*. 2020:e13356.  
49
- 50 43. Ning L, Liu L, Li W, Liu H, Wang J, Yao Z, et al. Novel Coronavirus (SARS-CoV-2)  
51 Infection in A Renal Transplant Recipient: Case Report. *American journal of transplantation : official journal of the American Society of Transplantation and the American Society of*  
52 *Transplant Surgeons*. 2020.  
53  
54  
55  
56  
57  
58  
59  
60

- 1  
2  
3 44. Parasole R, Stellato P, Conter V, De Matteo A, D'Amato L, Colombini A, et al. Collateral  
4 effects of COVID-19 pandemic in pediatric hematooncology: Fatalities caused by diagnostic  
5 delay. *Pediatric blood & cancer*. 2020:e28482.  
6
- 7 45. Park JY, Han MS, Park KU, Kim JY, Choi EH. First Pediatric Case of Coronavirus  
8 Disease 2019 in Korea. *Journal of Korean medical science*. 2020;35(11):e124.  
9
- 10 46. Quintavalle G, Coppola A, Ruggieri A, Franca Rivolta G, Fronti E, Giangregorio F, et al.  
11 Severe bleeding in a patient with Factor XIII deficiency and COVID-19. *Haemophilia : the official  
12 journal of the World Federation of Hemophilia*. 2020.  
13
- 14 47. Rodriguez-Cola M, Jimenez-Velasco I, Gutierrez-Henares F, Lopez-Dolado E,  
15 Gambarrutta-Malfatti C, Vargas-Baquero E, et al. Clinical features of coronavirus disease 2019  
16 (COVID-19) in a cohort of patients with disability due to spinal cord injury. *Spinal cord series  
17 and cases*. 2020;6(1):39.  
18
- 19 48. Sereno M, Gutierrez-Gutierrez G, Sandoval C, Falagan S, Jimenez-Gordo AM, Merino  
20 M, et al. A favorable outcome of pneumonia COVID 19 in an advanced lung cancer patient with  
21 severe neutropenia: Is immunosuppression a risk factor for SARS-COV2 infection? *Lung cancer  
22 (Amsterdam, Netherlands)*. 2020;145:213-5.  
23
- 24 49. Sharmeen S, Elghawy A, Zarlusht F, Yao QP. COVID-19 in rheumatic disease patients  
25 on immunosuppressive agents. *Seminars in arthritis and rheumatism*. 2020;50(4):680-6.  
26
- 27 50. Silverstein WK, Stroud L, Cleghorn GE, Leis JA. First imported case of 2019 novel  
28 coronavirus in Canada, presenting as mild pneumonia. *Lancet (London, England)*.  
29 2020;395(10225):734.  
30
- 31 51. Solis E, Hameed A, Brown K, Pleass H, Johnston E. Delayed emergency surgical  
32 presentation: impact of corona virus disease (COVID-19) on non-COVID patients. *ANZ journal  
33 of surgery*. 2020.  
34
- 35 52. Stoleriu MG, Gerckens M, Hetrodt J, Heis-Neumann M, Koch I, Stacher-Priehse E, et al.  
36 Clinical course of three postoperative symptomatic Covid-19 cases in patients after lung  
37 lobectomy. *The Annals of thoracic surgery*. 2020.  
38
- 39 53. Suess C, Hausmann R. Gross and histopathological pulmonary findings in a COVID-19  
40 associated death during self-isolation. *Int J Legal Med*. 2020;134(4):1285-90.  
41
- 42 54. Tantisattamo E, Reddy UG, Duong DK, Ferrey AJ, Ichii H, Dafoe DC, et al.  
43 Hyponatremia: A Possible Immuno-Neuroendocrine Interface with COVID-19 in a Kidney  
44 Transplant Recipient. *Transplant infectious disease : an official journal of the Transplantation  
45 Society*. 2020:e13355.  
46
- 47 55. Tomelleri A, Sartorelli S, Campochiaro C, Baldissera EM, Dagna L. Impact of COVID-19  
48 pandemic on patients with large-vessel vasculitis in Italy: a monocentric survey. *Annals of the  
49 rheumatic diseases*. 2020.  
50
- 51 56. Trapani D, Marra A, Curigliano G. The experience on coronavirus disease 2019 and  
52 cancer from an oncology hub institution in Milan, Lombardy Region. *European journal of cancer  
53 (Oxford, England : 1990)*. 2020;132:199-206.  
54  
55  
56  
57  
58  
59  
60

57. Tursi A, Papa A. Impact of anti-tnfalpa antibodies on the risk of Covid-19 and its severity in patients with inflammatory Bowel Diseases. *Journal of Crohn's & colitis*. 2020.
58. Verma A, Khorsandi SE, Dolcet A, Prachalias A, Suddle A, Heaton N, et al. Low prevalence and disease severity of COVID-19 in post liver transplant recipients - a single centre experience. *Liver international : official journal of the International Association for the Study of the Liver*. 2020.
59. Vlachodimitropoulou Koumoutsea E, Vivanti AJ, Shehata N, Benachi A, Le Gouez A, Desconclois C, et al. COVID19 and acute coagulopathy in pregnancy. *Journal of thrombosis and haemostasis : JTH*. 2020.
60. Warchol I, Debska-Kozłowska A, Karcz-Socha I, Książczyk M, Szymanska K, Lubinski A. Terra incognita: clinically suspected myocarditis in a patient with severe acute respiratory syndrome coronavirus 2 infection. *Polish archives of internal medicine*. 2020;130(5):446-8.
61. Yao L, Wang J, Zhao J. Asymptomatic novel coronavirus infection in pregnant woman in the third trimester: a case report [J/OL]. *Chin J Perinat Med*. 2020.
62. Zhao R, Wang H, Xu KJ, Sheng JF. Pregnancy with 2019 Novel Coronavirus: a case report. *Zhejiang Med J*. 2020;42:303-17.

#### **Excluded – wrong population (n=30)**

1. Auld SC, Caridi-Scheible M, Blum JM, Robichaux C, Kraft C, Jacob JT, et al. ICU and Ventilator Mortality Among Critically Ill Adults With Coronavirus Disease 2019. *Critical care medicine*. 2020.
2. Belhadjer Z, Méot M, Bajolle F, Khraiche D, Legendre A, Abakka S, et al. Acute heart failure in multisystem inflammatory syndrome in children (MIS-C) in the context of global SARS-CoV-2 pandemic. *Circulation*. 2020.
3. Bhatraju PK, Ghassemieh BJ, Nichols M, Kim R, Jerome KR, Nalla AK, et al. Covid-19 in Critically Ill Patients in the Seattle Region - Case Series. *The New England journal of medicine*. 2020;382(21):2012-22.
4. Cardoso FS, Pereira R, Germano N. Liver injury in critically ill patients with COVID-19: a case series. *Critical care (London, England)*. 2020;24(1):190.
5. Collin J, Byström E, Carnahan A, Ahrne M. Public Health Agency of Sweden's Brief Report: Pregnant and postpartum women with severe acute respiratory syndrome coronavirus 2 infection in intensive care in Sweden. *Acta Obstet Gynecol Scand*. 2020;99(7):819-22.
6. Fasano A, Cereda E, Barichella M, Cassani E, Ferri V, Zecchinelli AL, et al. COVID-19 in Parkinson's Disease Patients Living in Lombardy, Italy. *Movement disorders : official journal of the Movement Disorder Society*. 2020.
7. Fraisse M, Logre E, Pajot O, Mentec H, Plantefevre G, Contou D. Thrombotic and hemorrhagic events in critically ill COVID-19 patients: a French monocenter retrospective study. *Critical care (London, England)*. 2020;24(1):275.



- 1  
2  
3 8. Helms J, Kremer S, Merdji H, Clere-Jehl R, Schenck M, Kummerlen C, et al. Neurologic  
4 Features in Severe SARS-CoV-2 Infection. *The New England journal of medicine*.  
5 2020;382(23):2268-70.  
6
- 7 9. Kass DA, Duggal P, Cingolani O. Obesity could shift severe COVID-19 disease to  
8 younger ages. *Lancet (London, England)*. 2020;395(10236):1544-5.  
9
- 10 10. Korean Society of Infectious D, Korea Centers for Disease C, Prevention. Analysis on 54  
11 Mortality Cases of Coronavirus Disease 2019 in the Republic of Korea from January 19 to  
12 March 10, 2020. *Journal of Korean medical science*. 2020;35(12):e132.  
13
- 14 11. Lee C-C, Chang JC-Y, Mao X-W, Hsu W-T, Chen S-Y, Chen Y-C, et al. Combining  
15 Procalcitonin and Rapid Multiplex Respiratory Virus Testing for Antibiotic Stewardship in Older  
16 Adult Patients With Severe Acute Respiratory Infection. *Journal of the American Medical*  
17 *Directors Association*. 2020;21(1):62-7.  
18
- 19 12. Lemyze M, Courageux N, Maladobry T, Arumadura C, Pauquet P, Orfi A, et al.  
20 Implications of Obesity for the Management of Severe Coronavirus Disease 2019 Pneumonia.  
21 *Crit Care Med*. 2020.  
22
- 23 13. Llitjos JF, Leclerc M, Chochois C, Monsallier JM, Ramakers M, Auvray M, et al. High  
24 incidence of venous thromboembolic events in anticoagulated severe COVID-19 patients. *J*  
25 *Thromb Haemost*. 2020;18(7):1743-6.  
26
- 27 14. London V, McLaren R, Jr., Atallah F, Cepeda C, McCalla S, Fisher N, et al. The  
28 Relationship between Status at Presentation and Outcomes among Pregnant Women with  
29 COVID-19. *American journal of perinatology*. 2020.  
30
- 31 15. Mahase E. Covid-19: most patients require mechanical ventilation in first 24 hours of  
32 critical care. *BMJ (Clinical research ed)*. 2020;368:m1201.  
33
- 34 16. Marfella R, Paolisso P, Sardu C, Bergamaschi L, D'Angelo EC, Barbieri M, et al.  
35 Negative impact of hyperglycaemia on tocilizumab therapy in Covid-19 patients. *Diabetes &*  
36 *metabolism*. 2020.  
37
- 38 17. Montastruc F, Romano C, Montastruc J-L, Silva S, Seguin T, Minville V, et al.  
39 Pharmacological characteristics of patients infected with SARS-Cov-2 admitted to Intensive  
40 Care Unit in South of France. *Therapie*. 2020.  
41
- 42 18. Nahum J, Morichau-Beauchant T, Daviaud F, Echegut P, Fichet J, Maillet J-M, et al.  
43 Venous Thrombosis Among Critically Ill Patients With Coronavirus Disease 2019 (COVID-19).  
44 *JAMA network open*. 2020;3(5):e2010478.  
45
- 46 19. Pan C, Chen L, Lu C, Zhang W, Xia J-A, Sklar MC, et al. Lung Recruitability in COVID-  
47 19-associated Acute Respiratory Distress Syndrome: A Single-Center Observational Study.  
48 *American journal of respiratory and critical care medicine*. 2020;201(10):1294-7.  
49
- 50 20. Pavoni V, Ganesello L, Pazzi M, Stera C, Meconi T, Frigieri FC. Evaluation of  
51 coagulation function by rotation thromboelastometry in critically ill patients with severe COVID-  
52 19 pneumonia. *J Thromb Thrombolysis*. 2020:1-6.  
53  
54  
55  
56  
57  
58  
59

21. Pedersen HP, Hildebrandt T, Poulsen A, Uslu B, Knudsen HH, Roed J, et al. Initial experiences from patients with COVID-19 on ventilatory support in Denmark. *Danish medical journal*. 2020;67(5).
22. Piva S, Filippini M, Turla F, Cattaneo S, Margola A, De Fulviis S, et al. Clinical presentation and initial management critically ill patients with severe acute respiratory syndrome coronavirus 2 (SARS-CoV-2) infection in Brescia, Italy. *Journal of critical care*. 2020;58:29-33.
23. Saeed U, Sellevoll HB, Young VS, Sandbaek G, Glomsaker T, Mala T. Covid-19 may present with acute abdominal pain. *The British journal of surgery*. 2020;107(7):e186-e7.
24. Sciascia S, Apra F, Baffa A, Baldovino S, Boaro D, Boero R, et al. Pilot prospective open, single-arm multicentre study on off-label use of tocilizumab in patients with severe COVID-19. *Clinical and experimental rheumatology*. 2020;38(3):529-32.
25. Spiezia L, Boscolo A, Poletto F, Cerruti L, Tiberio I, Campello E, et al. COVID-19-Related Severe Hypercoagulability in Patients Admitted to Intensive Care Unit for Acute Respiratory Failure. *Thrombosis and haemostasis*. 2020;120(6):998-1000.
26. Thomas W, Varley J, Johnston A, Symington E, Robinson M, Sheares K, et al. Thrombotic complications of patients admitted to intensive care with COVID-19 at a teaching hospital in the United Kingdom. *Thrombosis research*. 2020;191:76-7.
27. Toniati P, Piva S, Cattalini M, Garrafa E, Regola F, Castelli F, et al. Tocilizumab for the treatment of severe COVID-19 pneumonia with hyperinflammatory syndrome and acute respiratory failure: A single center study of 100 patients in Brescia, Italy. *Autoimmunity reviews*. 2020;19(7):102568.
28. Violi F, Pastori D, Pignatelli P, Cangemi R. SARS-CoV-2 and myocardial injury: a role for Nox2? *Internal and emergency medicine*. 2020.
29. Wright FL, Vogler TO, Moore EE, Moore HB, Wohlaer MV, Urban S, et al. Fibrinolysis Shutdown Correlation with Thromboembolic Events in Severe COVID-19 Infection. *J Am Coll Surg*. 2020.
30. Zangrillo A, Beretta L, Scandroglio AM, Monti G, Fominskiy E, Colombo S, et al. Characteristics, treatment, outcomes and cause of death of invasively ventilated patients with COVID-19 ARDS in Milan, Italy. *Critical care and resuscitation : journal of the Australasian Academy of Critical Care Medicine*. 2020.

#### **Excluded – other study type (n=3)**

1. Adams ML, Katz DL, Grandpre J. Population-based estimates of chronic conditions affecting risk for complications from coronavirus disease, United States. *Emerging infectious diseases*. 2020;26(8).
2. Bar S, Lecourtois A, Diouf M, Goldberg E, Bourbon C, Arnaud E, et al. The association of lung ultrasound images with COVID-19 infection in an emergency room cohort. *Anaesthesia*. 2020.

1  
2  
3 3. Smith-Ray R, Roberts EE, Littleton DE, Singh T, Sandberg T, Taitel M. Distribution of  
4 Patients at Risk for Complications Related to COVID-19 in the United States: Model  
5 Development Study. *JMIR Public Health Surveill.* 2020;6(2):e19606.  
6  
7  
8

9 **Excluded – unusable at data extraction (n=9)**

- 10  
11 1. Zhu Z, Hasegawa K, Ma B, Fujiogi M, Camargo CA, Jr., Liang L. Association of asthma  
12 and its genetic predisposition with the risk of severe COVID-19. *The Journal of allergy and*  
13 *clinical immunology.* 2020.  
14  
15 2. Targher G, Mantovani A, Byrne CD, Wang X-B, Yan H-D, Sun Q-F, et al. Detrimental  
16 effects of metabolic dysfunction-associated fatty liver disease and increased neutrophil-to-  
17 lymphocyte ratio on severity of COVID-19. *Diabetes & metabolism.* 2020.  
18  
19 3. Slaunwhite AK, Gan WQ, Xavier C, Zhao B, Buxton JA, Desai R. Overdose and risk  
20 factors for coronavirus disease 2019. *Drug and alcohol dependence.* 2020;212:108047.  
21  
22 4. Oksanen A, Kaakinen M, Latikka R, Savolainen I, Savela N, Koivula A. Regulation and  
23 Trust: 3-Month Follow-up Study on COVID-19 Mortality in 25 European Countries. *JMIR public*  
24 *health and surveillance.* 2020;6(2):e19218.  
25  
26 5. Mahajan UV, Larkins-Pettigrew M. Racial demographics and COVID-19 confirmed cases  
27 and deaths: a correlational analysis of 2886 US counties. *Journal of public health (Oxford,*  
28 *England).* 2020.  
29  
30 6. Lieberman-Cribbin W, Rapp J, Alpert N, Tuminello S, Taioli E. The impact of asthma on  
31 mortality in COVID-19 patients. *Chest.* 2020.  
32  
33 7. Kim SJ, Bostwick W. Social Vulnerability and Racial Inequality in COVID-19 Deaths in  
34 Chicago. *Health education & behavior : the official publication of the Society for Public Health*  
35 *Education.* 2020:1090198120929677.  
36  
37 8. Imam Z, Odish F, Armstrong J, Elassar H, Dokter J, Langnas E, et al. Independent  
38 Correlates of Hospitalization in 2040 Patients with COVID-19 at a Large Hospital System in  
39 Michigan, United States. *Journal of general internal medicine.* 2020.  
40  
41 9. Ho CS, Chee CY, Ho RC. Mental Health Strategies to Combat the Psychological Impact  
42 of COVID-19 Beyond Paranoia and Panic. *Annals of the Academy of Medicine, Singapore.*  
43 2020;49(3):1-3.  
44

45 **Excluded – other (n=10)**

- 46  
47 1. Balavoine J-F. Comparer la mortalite du COVID-19 et de l'influenza: tout faux?  
48 2020;16(697):1222.  
49  
50 2. Banerjee A, Pasea L, Harris S, Gonzalez-Izquierdo A, Torralbo A, Shallcross L, et al.  
51 Estimating excess 1-year mortality associated with the COVID-19 pandemic according to  
52 underlying conditions and age: a population-based cohort study. *Lancet (London, England).*  
53 2020;395(10238):1715-25.  
54  
55  
56  
57  
58  
59  
60

3. Chowdhury R, Heng K, Shawon MSR, Goh G, Okonofua D, Ochoa-Rosales C, et al. Dynamic interventions to control COVID-19 pandemic: a multivariate prediction modelling study comparing 16 worldwide countries. *European journal of epidemiology*. 2020;35(5):389-99.
4. Dehghani P, Davidson LJ, Grines CL, Nayak K, Saw J, Kaul P, et al. North American COVID-19 ST-segment elevation myocardial infarction (NACMI) registry: Rationale, design, and implications. *American heart journal*. 2020.
5. El-Kurdi B, Khatua B, Rood C, Snozek C, Cartin-Ceba R, Singh VP, et al. MORTALITY FROM COVID-19 INCREASES WITH UNSATURATED FAT, AND MAY BE REDUCED BY EARLY CALCIUM AND ALBUMIN SUPPLEMENTATION. *Gastroenterology*. 2020.
6. Li D, Croft DP, Ossip DJ, Xie Z. Are Vapers More Susceptible to COVID-19 Infection? *medRxiv : the preprint server for health sciences*. 2020.
7. Mehra MR, Desai SS, Kuy S, Henry TD, Patel AN. Cardiovascular Disease, Drug Therapy, and Mortality in Covid-19. *The New England journal of medicine*. 2020.
8. Sakiko T, Kazuo I, Shuichi K, Mayu I, Tatsuya K, Kazuyasu M, et al. Non-severe vs severe symptomatic COVID-19: 104 cases from the outbreak on the cruise ship "Diamond Princess" in Japan. *medRxiv*. 2020.
9. Testino G, Fagoonee S. Coronavirus disease 2019 outbreak: liver disease a prognostic tool? *Panminerva medica*. 2020.
10. Unger JM, Blanke CD, LeBlanc M, Hershman DL. Association of the Coronavirus Disease 2019 (COVID-19) Outbreak With Enrollment in Cancer Clinical Trials. *JAMA network open*. 2020;3(6):e2010651.

Supplement 4. Characteristics of included studies

| Author, year;<br>Publication date;<br>Country;<br>Study design;<br>Study period & follow-up                           | Enrolled cohort;<br>Study sample;<br>Mean age (SD), years <sup>1</sup><br>Male, proportion                                                                                                                                     | COVID-19<br>diagnosis                                                                                  | P <sup>2</sup> ROGRESS risk factors,<br>adjusted for in multivariate<br>regression analysis <sup>2</sup>                                                                                                                                                                                            | Outcomes                | Quality rating &<br>concerns (if any)                                 |
|-----------------------------------------------------------------------------------------------------------------------|--------------------------------------------------------------------------------------------------------------------------------------------------------------------------------------------------------------------------------|--------------------------------------------------------------------------------------------------------|-----------------------------------------------------------------------------------------------------------------------------------------------------------------------------------------------------------------------------------------------------------------------------------------------------|-------------------------|-----------------------------------------------------------------------|
| Azar K, 2020<br><br>May 21 (published)<br><br>USA<br><br>Retrospective cohort<br><br>Jan 1-Apr 8                      | Patients ≥18 years old who had at least one encounter at a Sutter facility (integrated health system) during the study period for suspected or confirmed COVID-19 infection<br><br>N=1,052<br><br>53 (95% CI 52-54)<br><br>49% | ICD codes or evidence in lab records (reports suspected cases but confirmed cases analyzed separately) | Pre-existing condition (asthma, cardiovascular disease, cancer, chronic pulmonary disease, congestive heart failure, type II diabetes, hypertension, depression);<br>Place of residence (homeless);<br>Race/ethnicity;<br>Sex;<br>SES (household income);<br>Age;<br>Other factors (smoking status) | Rate of hospitalization | Good;<br>No major concerns                                            |
| Bhargava A, 2020<br><br>May 30 (published)<br><br>USA<br><br>Retrospective cohort<br><br>Mar 8-Apr 8                  | Adults admitted to a tertiary care urban academic medical center with COVID-19<br><br>N=197<br><br>61 (16)<br><br>52%                                                                                                          | RT-PCR                                                                                                 | Pre-existing condition (renal disease);<br>Sex;<br>Age                                                                                                                                                                                                                                              | Severe disease          | Good;<br>No major concerns                                            |
| Bianchetti A, 2020<br><br>May 11 (accepted)<br><br>Italy<br><br>Retrospective cohort<br><br>Study period not reported | Adults admitted to acute medical wards with COVID-19 pneumonia in Brescia<br><br>N=627<br><br>71 (13)<br><br>47%                                                                                                               | RT-PCR                                                                                                 | Pre-existing condition (dementia);<br>Sex;<br>Age                                                                                                                                                                                                                                                   | Mortality               | Fair;<br>Did not report follow-up duration or censorship for outcomes |

|                                                                                                          |                                                                                                                 |                                                                                                                                              |                |                                                                                                               |                                                                                         |                                                                                                                         |
|----------------------------------------------------------------------------------------------------------|-----------------------------------------------------------------------------------------------------------------|----------------------------------------------------------------------------------------------------------------------------------------------|----------------|---------------------------------------------------------------------------------------------------------------|-----------------------------------------------------------------------------------------|-------------------------------------------------------------------------------------------------------------------------|
| 1<br>2<br>3<br>4<br>5<br>6<br>7<br>8<br>9<br>10<br>11<br>12                                              | Borobia A, 2020<br>June 4 (published)<br>Spain<br>Retrospective cohort<br>Feb 25-Apr 19;<br>Follow-up to Apr 19 | Adults $\geq 18$ years old hospitalized in wards or the ED at a university hospital with COVID-19<br>N=2,226<br>Median 61 (IQR 46-78)<br>48% | Lab-confirmed  | Pre-existing condition (not clearly specified for multivariate analysis);<br>Sex;<br>Age                      | Mortality                                                                               | Fair;<br>No follow-up and censored to patients who died or were discharged by April 19                                  |
| 13<br>14<br>15<br>16<br>17<br>18<br>19<br>20                                                             | Busetto L, 2020<br>May 28 (accepted)<br>Italy<br>Retrospective cohort<br>Mar 14-Apr 11                          | Adults hospitalized in a medical COVID-19 ward with SARS-CoV-2 related pneumonia<br>N=92<br>71 (13)<br>62%                                   | RT-PCR         | Pre-existing condition (BMI/obesity, chronic respiratory disease, dementia, type II diabetes);<br>Sex;<br>Age | ICU admission;<br>Noninvasive ventilation or MV (composite);<br>Mortality (in-hospital) | Fair;<br>Did not report follow-up duration or censorship for outcomes                                                   |
| 21<br>22<br>23<br>24<br>25<br>26<br>27<br>28<br>29                                                       | Cecconi M, 2020<br>May 20 (published)<br>Italy<br>Retrospective cohort<br>Feb 22-Mar 22                         | Adults $\geq 18$ years old admitted to a hospital with COVID-19<br>N=239<br>64 (14)<br>71%                                                   | Positive assay | Pre-existing condition (coronary heart disease);<br>Age                                                       | ICU admission or mortality (composite)                                                  | Fair;<br>No adjustment for sex and patients were censored as of March 25 (inadequate for patients enrolled on March 22) |
| 30<br>31<br>32<br>33<br>34<br>35<br>36<br>37<br>38<br>39<br>40<br>41<br>42<br>43<br>44<br>45<br>46<br>47 | Colaneri M, 2020<br>Apr 23 (published)<br>Italy<br>Retrospective cohort<br>Feb 21-28;<br>Follow-up to Mar 4     | Patients admitted to a hospital with COVID-19<br>N=44<br>Median 68 (IQR 29)<br>64%                                                           | RT-PCR         | Pre-existing condition (tumor);<br>Sex                                                                        | Severe disease                                                                          | Good;<br>No major concerns                                                                                              |

|                                                                |                                                                                                                                |                                                                                                                                                                                                                                               |                   |                                                                                                                                                                                                                                                                                                                                                                          |                                                                                 |                                                                                      |
|----------------------------------------------------------------|--------------------------------------------------------------------------------------------------------------------------------|-----------------------------------------------------------------------------------------------------------------------------------------------------------------------------------------------------------------------------------------------|-------------------|--------------------------------------------------------------------------------------------------------------------------------------------------------------------------------------------------------------------------------------------------------------------------------------------------------------------------------------------------------------------------|---------------------------------------------------------------------------------|--------------------------------------------------------------------------------------|
| 1<br>2<br>3<br>4<br>5<br>6<br>7<br>8<br>9<br>10<br>11<br>12    | Covino M, 2020<br>May 18 (accepted)<br>Italy<br>retrospective cohort<br>Mar 1-31;<br>Follow-up at 30 days<br>from ED admission | Adults ≥80 years old admitted to ED<br>of urban teaching hospital for<br>suspected COVID-19<br><br>N=69<br><br>Median 84 (IQR 82-89)<br><br>54%                                                                                               | RT-PCR            | Pre-existing condition (severe<br>dementia)                                                                                                                                                                                                                                                                                                                              | Mortality                                                                       | Fair;<br>No adjustment for age<br>or sex, or other pre-<br>existing conditions       |
| 13<br>14<br>15<br>16<br>17<br>18<br>19<br>20<br>21<br>22<br>23 | Cummings MJ, 2020<br>May 19 (published)<br>USA<br>Prospective cohort<br>Mar 2-Apr 1;<br>Follow-up to Apr 28                    | Adults admitted to high-dependency<br>unit (O2) or ICU (MV) of two<br>hospitals in New York with COVID-<br>19 and were critically ill with acute<br>hypoxaemic respiratory failure<br><br>N=257<br><br>Median 62 (IQR 51-72)<br><br>67%       | Lab-<br>confirmed | Pre-existing condition (chronic<br>cardiac disease [coronary artery<br>disease or congestive heart<br>failure], chronic pulmonary<br>disease [chronic obstructive<br>pulmonary disease/interstitial<br>lung disease], diabetes,<br>hypertension);<br>Sex;<br>Age                                                                                                         | Mortality (in-hospital)                                                         | Good;<br>No major concerns                                                           |
| 24<br>25<br>26<br>27<br>28<br>29<br>30<br>31<br>32<br>33<br>34 | Docherty AB, 2020<br>May 15 (accepted)<br>UK<br>Prospective cohort<br>Feb 6-Apr 19;<br>Follow-up at least 2<br>weeks to May 3  | Children and adults admitted to 208<br>acute care hospitals with COVID-19<br>in England, Wales, and Scotland<br><br>N=20,133<br><br>Median 73 (IQR 58-82)<br><br>60%                                                                          | RT-PCR            | Pre-existing condition (chronic<br>cardiac disease, chronic<br>pulmonary disease, asthma,<br>CKD, DM, obesity, chronic<br>neurological disorder, dementia,<br>malignancy, moderate/severe<br>liver disease, mild liver disease,<br>chronic hematologic disease,<br>rheumatologic disorder,<br>HIV/AIDS, malnutrition);<br>Sex;<br>Age;<br>Other factors (smoking status) | Mortality (in-hospital)                                                         | Good;<br>No major concerns                                                           |
| 35<br>36<br>37<br>38<br>39<br>40<br>41                         | D'Silva K, 2020<br>May 18 (accepted)<br>USA<br>Retrospective cohort                                                            | Patients seen at PHS who were ≥18<br>years of age and had a positive test<br>result for SARS-CoV-2 by PCR<br>clinical assay. *PHS is a large<br>healthcare system that includes<br>tertiary care hospitals<br>(Massachusetts General Hospital | PCR               | Pre-existing condition<br>(rheumatic disease)                                                                                                                                                                                                                                                                                                                            | Rate of hospitalization;<br>ICU admission/ or MV (all<br>with MV);<br>Mortality | Fair;<br>No adjustment for sex,<br>and mortality only<br>adjusted for age and<br>BMI |

|                                                          |                                                                                                                                           |                                                                                                                                                                                                                                                             |                                  |                                                                                                                                                                                                                                                                                                                                                 |                                                |                            |
|----------------------------------------------------------|-------------------------------------------------------------------------------------------------------------------------------------------|-------------------------------------------------------------------------------------------------------------------------------------------------------------------------------------------------------------------------------------------------------------|----------------------------------|-------------------------------------------------------------------------------------------------------------------------------------------------------------------------------------------------------------------------------------------------------------------------------------------------------------------------------------------------|------------------------------------------------|----------------------------|
| 1<br>2<br>3<br>4<br>5<br>6<br>7<br>8<br>9<br>10<br>11    | Mar 1-Apr 8;<br>Follow-up averaged 29<br>days                                                                                             | and Brigham and Women's<br>Hospital), community hospitals and<br>primary and specialty outpatient<br>centres in the greater Boston<br><br>N=156<br><br>63 (15)<br><br>31%                                                                                   |                                  |                                                                                                                                                                                                                                                                                                                                                 |                                                |                            |
| 12<br>13<br>14<br>15<br>16<br>17<br>18<br>19<br>20<br>21 | El-Boghdady K, 2020<br><br>June 9 (accepted)<br><br>Multi-country<br><br>Prospective cohort<br><br>Mar 23-Jun 2                           | Healthcare workers from 503<br>hospitals in 17 countries who<br>performed tracheal intubations, with<br>data for new COVID-19 infection or<br>new COVID-19 symptoms requiring<br>self-isolation or hospitalization.<br><br>N=1,718<br><br>42 (9)<br><br>60% | Lab-<br>confirmed or<br>symptoms | Occupation<br>(intubator/laryngologist vs.<br>assistant);<br>Sex                                                                                                                                                                                                                                                                                | Self-isolation/ hospitalization<br>(composite) | Good;<br>No major concerns |
| 22<br>23<br>24<br>25<br>26<br>27<br>28<br>29<br>30<br>31 | Giacomelli A, 2020<br><br>May 22 (published)<br><br>Italy<br><br>Prospective cohort<br><br>Feb 21-Mar 19;<br>Follow-up to Apr 20          | Adults hospitalized at one hospital<br>with COVID-19<br><br>N=233<br><br>Median 61 (IQR 50-72)<br><br>62%                                                                                                                                                   | RT-PCR                           | Pre-existing condition (age<br>unadjusted Charlson<br>Comorbidity Index, obesity,<br>anemia);<br>Sex;<br>Age                                                                                                                                                                                                                                    | Mortality                                      | Good;<br>No major concerns |
| 32<br>33<br>34<br>35<br>36<br>37<br>38<br>39<br>40<br>41 | Gold J, 2020<br><br>May 8 (published,<br>MMWR weekly report)<br><br>USA<br><br>Prospective cohort<br><br>Mar 1-30;<br>Follow-up to Apr 28 | Adults ≥18 years old hospitalized at<br>eight hospitals with COVID-19<br><br>N=305<br><br>Median 60 (IQR 46-69)<br><br>49%                                                                                                                                  | Lab-<br>confirmed                | Pre-existing condition (obesity,<br>diabetes, cardiovascular<br>disease, coronary artery<br>disease, congenital heart<br>disease, arrhythmia, chronic<br>lung disease, asthma, chronic<br>obstructive pulmonary disease,<br>immunocompromising<br>conditions/therapies, end-stage<br>renal disease on dialysis, liver<br>disease, hypertension, | MV or mortality (composite)                    | Good;<br>No major concerns |



|                                                                                                                         |                                                                                                                                          |        |                                                                                                                                                |                                                  |                                                                                                                                                            |
|-------------------------------------------------------------------------------------------------------------------------|------------------------------------------------------------------------------------------------------------------------------------------|--------|------------------------------------------------------------------------------------------------------------------------------------------------|--------------------------------------------------|------------------------------------------------------------------------------------------------------------------------------------------------------------|
|                                                                                                                         |                                                                                                                                          |        | neurologic disorder, chronic liver disease without dialysis, cancer, rheumatologic or autoimmune condition);<br>Race/ethnicity;<br>Sex;<br>Age |                                                  |                                                                                                                                                            |
| Hajifathalian K, 2020 (#163)<br>May 29 (accepted)<br>USA<br>Retrospective cohort<br>Mar 4-Apr 9;<br>Follow-up to Apr 16 | Adults ≥18 years old with and without obesity hospitalized in ED or inpatient wards with COVID-19<br><br>N=770<br><br>64 (17)<br><br>61% | RT-PCR | Pre-existing condition (obesity)                                                                                                               | ICU admission;<br>MV;<br>Mortality (in-hospital) | Fair;<br>No adjustment for sex, and 7-day follow-up inadequate for mortality                                                                               |
| Hajifathalian K, 2020 (#1154)<br>May 1 (accepted)<br>USA<br>Retrospective cohort<br>Mar 4-Apr 9                         | Adults with SARS-CoV-2<br><br>N=1,059<br><br>61 (18)<br><br>58%                                                                          | RT-PCR | Pre-existing condition (number of comorbidities);<br>Age                                                                                       | ICU admission or mortality (composite)           | Fair;<br>Unclear if adjustment for sex, and did not report follow-up duration or censorship for outcomes                                                   |
| Hamer M, 2020<br>May 23 (published)<br>UK<br>Prospective cohort<br>Mar 16-Apr 26                                        | Adults in the community<br><br>N=387,109<br><br>56 (8)<br><br>45%                                                                        | RT-PCR | Pre-existing condition (overweight, obesity);<br>Other factors (smoking status, level of alcohol consumption, level of physical activity)      | Rate of hospitalization                          | Fair;<br>One of three publications reporting on same or similar population, significant amount of missing data and data on risk factors are from 2006-2010 |
| Hur K, 2020<br>May 20 (accepted)                                                                                        | Patients hospitalized with laboratory-confirmed COVID-19 infection admitted to any of the 10                                             | RT-PCR | Pre-existing condition (obesity, diabetes, hypertension);                                                                                      | MV                                               | Good;<br>No major concerns                                                                                                                                 |

|                                                                                  |                                                                                                                     |                                                                                                                                                                                                                                                                                                                                          |        |                                                                                                                        |                         |                                                                                                                                                                                                               |
|----------------------------------------------------------------------------------|---------------------------------------------------------------------------------------------------------------------|------------------------------------------------------------------------------------------------------------------------------------------------------------------------------------------------------------------------------------------------------------------------------------------------------------------------------------------|--------|------------------------------------------------------------------------------------------------------------------------|-------------------------|---------------------------------------------------------------------------------------------------------------------------------------------------------------------------------------------------------------|
| 1<br>2<br>3<br>4<br>5<br>6<br>7<br>8<br>9<br>10<br>11<br>12                      | USA<br>Retrospective cohort<br>Mar 1-Apr 8;<br>Follow-up to Apr 18                                                  | hospitals in the Northwestern Memorial HealthCare system spread across the Chicago metropolitan area<br><br>N=486<br><br>Median 59 (IQR 19-101)<br><br>56%                                                                                                                                                                               |        | Place of residence (suburban vs. urban hospital);<br>Race/ethnicity;<br>Sex;<br>Age;<br>Other factors (smoking status) |                         |                                                                                                                                                                                                               |
| 13<br>14<br>15<br>16<br>17<br>18<br>19<br>20<br>21<br>22<br>23                   | Imam Z, 2020<br>June 4 (published)<br>USA<br>Retrospective cohort<br>Mar 1-Apr 17;<br>outcome analysis ended Apr 17 | Individuals that were hospitalized at a hospital within Beaumont Health with SARS-CoV-2 infection demonstrated by a positive RT-PCR on nasopharyngeal swab per world health organization (WHO) guidance<br><br>N=1,305<br><br>61 (16)<br><br>54%                                                                                         | RT-PCR | Pre-existing condition (Charlson Comorbidity Index >3);<br>Age                                                         | Mortality (in-hospital) | Fair;<br>Adjustment for Charlson Comorbidity Index score (>3) despite individual comorbidities being significant at univariate analysis, and some missing data for ethnicity (n=5) and smoking status (n=240) |
| 24<br>25<br>26<br>27<br>28<br>29<br>30<br>31<br>32<br>33<br>34<br>35<br>36<br>37 | Kalligeros M, 2020<br>June 12 (published)<br>USA<br>Retrospective cohort<br>Feb 17-Apr 5                            | All consecutive adult (≥18 years old) patients who had a laboratory confirmed (using a reverse transcriptase–polymerase chain reaction assay) SARS-CoV-2 infection and who were hospitalized at the Rhode Island Hospital, The Miriam Hospital, or Newport Hospital in Rhode Island<br><br>N=103<br><br>Median 60 (IQR 50-72)<br><br>61% | RT-PCR | Pre-existing condition (obesity, diabetes, hypertension, heart disease, lung disease);                                 | ICU admission;<br>MV    | Good;<br>No major concerns                                                                                                                                                                                    |
| 38<br>39<br>40<br>41<br>42<br>43<br>44<br>45<br>46<br>47                         | Klang E, 2020<br>May 23 (accepted)                                                                                  | Adults hospitalized at five academic hospitals with COVID-19 with BMI information                                                                                                                                                                                                                                                        | PCR    | Pre-existing condition (obesity, diabetes, heart disease, hypertension, lung disease);<br>Race/ethnicity;              | Mortality (in-hospital) | Fair;<br>Did not report follow-up duration or censorship for outcomes, and a                                                                                                                                  |

|                                                                                                             |                                                                                                                                                                                                      |               |                                                                                                                                                                                                                                                                                                                                                                                   |                                |                                                                                                                                                            |
|-------------------------------------------------------------------------------------------------------------|------------------------------------------------------------------------------------------------------------------------------------------------------------------------------------------------------|---------------|-----------------------------------------------------------------------------------------------------------------------------------------------------------------------------------------------------------------------------------------------------------------------------------------------------------------------------------------------------------------------------------|--------------------------------|------------------------------------------------------------------------------------------------------------------------------------------------------------|
| USA<br>Retrospective cohort<br>Mar 1-May 17                                                                 | N=3,406<br>Range 34 to 84 y<br>58%                                                                                                                                                                   |               | Sex;<br>Age                                                                                                                                                                                                                                                                                                                                                                       |                                | large number of patients who were still hospitalized at time of analysis were excluded (n=1,047)                                                           |
| Lassale C, 2020<br>May 28 (accepted)<br>UK<br>Prospective cohort<br>Mar 16-Apr 26                           | Adults in the community<br>N=340,966<br>56 (8)<br>45%                                                                                                                                                | RT-PCR        | Pre-existing condition (obesity, cardiovascular disease, chronic bronchitis, ever seen a psychiatrist);<br>Place of residence (number in household);<br>Race/ethnicity;<br>Sex;<br>Education/literacy level (university degree vs. lower education);<br>SES (Townsend index);<br>Age;<br>Other factors (smoking status, level of alcohol consumption, level of physical activity) | Rate of hospitalization        | Fair;<br>One of three publications reporting on same or similar population, significant amount of missing data and data on risk factors are from 2006-2010 |
| Okoh A, 2020<br>June 10 (published)<br>USA<br>Retrospective cohort<br>Mar 10-Apr 10;<br>Follow-up to Apr 20 | Adults ≥18 years old of Black/African American or Latino/Hispanic ethnicity hospitalised at a quaternary care teaching hospital in New Jersey with COVID-19<br>N=251<br>Median 62 (IQR 49-74)<br>51% | RT-PCR        | Pre-existing condition (coronary artery disease, chronic kidney disease, hypertension, HIV);<br>Race/ethnicity;<br>Sex;<br>Age                                                                                                                                                                                                                                                    | Mortality (in-hospital)        | Good;<br>No major concerns                                                                                                                                 |
| Palaiodimos L, 2020<br>May 14 (accepted)<br>USA<br>Retrospective cohort                                     | Adults (first 200) admitted to the inpatient medicine service or the ICU of a tertiary academic institution with COVID-19<br>N=200                                                                   | Lab-confirmed | Pre-existing condition (overweight, obesity, coronary artery disease, chronic kidney disease or end-stage renal disease, chronic obstructive pulmonary disease, diabetes,                                                                                                                                                                                                         | MV;<br>Mortality (in-hospital) | Good;<br>No major concerns                                                                                                                                 |

|                                                                                  |                                                                                                                                                   |                                                                                                                                              |        |                                                                                                                                                                                                                                                                                                                                                                                                                                |                                                                        |                                                                                                                                                                                  |
|----------------------------------------------------------------------------------|---------------------------------------------------------------------------------------------------------------------------------------------------|----------------------------------------------------------------------------------------------------------------------------------------------|--------|--------------------------------------------------------------------------------------------------------------------------------------------------------------------------------------------------------------------------------------------------------------------------------------------------------------------------------------------------------------------------------------------------------------------------------|------------------------------------------------------------------------|----------------------------------------------------------------------------------------------------------------------------------------------------------------------------------|
| 1<br>2<br>3<br>4<br>5<br>6<br>7                                                  | Mar 9-Mar 22;<br>Follow-up 3 weeks to<br>Apr 12                                                                                                   | Median 64 (IQR 50-74)<br><br>49%                                                                                                             |        | heart failure, hyperlipidemia,<br>obstructive sleep apnea;<br>Sex;<br>Age;<br>Other factors (smoking status)                                                                                                                                                                                                                                                                                                                   |                                                                        |                                                                                                                                                                                  |
| 8<br>9<br>10<br>11<br>12<br>13<br>14<br>15<br>16<br>17<br>18<br>19               | Patel AP, 2020<br><br>July 6 (published, letter)<br><br>UK<br><br>Prospective cohort<br><br>Mar 16-Apr 14                                         | Adults who were enrolled in a<br>national health database<br><br>N=418,794<br><br>66 (SD not reported)<br><br>45%                            | PCR    | Pre-existing condition (obesity,<br>chronic obstructive pulmonary<br>disease, coronary artery<br>disease, diabetes, chronic<br>kidney disease, heart failure,<br>hypertension, ischemic stroke,<br>previous pneumonia,<br>Alzheimer's or dementia);<br>Race/ethnicity;<br>Sex;<br>SES (Townsend index, average<br>income);<br>Age;<br>Other factors (smoking status)                                                           | Rate of hospitalization                                                | Fair;<br>One of three<br>publications reporting<br>on same or similar<br>population, significant<br>amount of missing data<br>and data on risk<br>factors are from 2006-<br>2010 |
| 20<br>21<br>22<br>23<br>24<br>25<br>26<br>27<br>28<br>29<br>30<br>31<br>32<br>33 | Perez-Guzman PN,<br>2020<br><br>April 29 (published,<br>report)<br><br>UK<br><br>retrospective cohort<br><br>Feb 25-Apr 5;<br>Follow-up to Apr 19 | Adults hospitalized at three<br>hospitals (with a multi-ethnic<br>catchment) with COVID-19<br><br>N=520<br><br>Median 67 (IQR 26)<br><br>62% | RT-PCR | Pre-existing condition<br>(Elixhauser score, obesity,<br>diabetes, ischaemic heart,<br>hypertension, hyperlipidemia,<br>chronic heart failure, stroke,<br>asthma, chronic obstructive<br>pulmonary disease, dementia,<br>chronic kidney disease,<br>dementia, solid tumor, liver non-<br>cirrhotic, liver cirrhotic, atrial<br>fibrillation, deep vein<br>thrombosis/pulmonary<br>embolism);<br>Race/ethnicity;<br>Sex;<br>Age | Mortality (in-hospital)                                                | Good;<br>No major concerns                                                                                                                                                       |
| 34<br>35<br>36<br>37<br>38<br>39<br>40<br>41<br>42<br>43<br>44<br>45<br>46<br>47 | Petrilli CM, 2020<br><br>May 14 (accepted)<br><br>USA<br><br>Prospective cohort                                                                   | Adults tested for SARS-CoV-2 from<br>260 outpatient office sites and 4<br>acute care hospitals<br><br>N=5,279<br><br>Median 54 (IQR 38-66)   | RT-PCR | Pre-existing condition (obesity,<br>asthma or chronic obstructive<br>pulmonary disease, chronic<br>lung disease, coronary artery<br>disease, diabetes, heart failure,<br>hyperlipidemia, hypertension,<br>cancer);<br>Race/ethnicity;                                                                                                                                                                                          | Rate of hospitalization;<br>Severe disease;<br>Mortality (in-hospital) | Good;<br>No major concerns                                                                                                                                                       |

|                                                                |                                                                                                                                                  |                                                                                                                                                                      |               |                                                                                                                                                             |                                                     |                                                                                                                                                                                         |
|----------------------------------------------------------------|--------------------------------------------------------------------------------------------------------------------------------------------------|----------------------------------------------------------------------------------------------------------------------------------------------------------------------|---------------|-------------------------------------------------------------------------------------------------------------------------------------------------------------|-----------------------------------------------------|-----------------------------------------------------------------------------------------------------------------------------------------------------------------------------------------|
| 1<br>2<br>3<br>4<br>5<br>6                                     | Mar 1-Apr 8;<br>Follow-up to May 5                                                                                                               | 50%                                                                                                                                                                  |               | Sex;<br>Age;<br>Other factors (smoking status)                                                                                                              |                                                     |                                                                                                                                                                                         |
| 7<br>8<br>9<br>10<br>11<br>12<br>13<br>14<br>15                | Piano S, 2020<br><br>June 11 (published)<br><br>Italy<br><br>Retrospective cohort<br><br>Feb 22-Apr 8                                            | Non-critically ill patients hospitalized with COVID-19 in five internal medicine COVID unit in two regions of Northern Italy<br><br>N=565<br><br>66 (15)<br><br>63%  | RT-PCR        | Pre-existing condition (liver function, Charlson Comorbidity Index);<br>Gender;<br>Age                                                                      | Transfer to ICU or mortality (composite)            | Good;<br>No major concerns                                                                                                                                                              |
| 16<br>17<br>18<br>19<br>20<br>21<br>22<br>23<br>24<br>25<br>26 | Price-Haywood EG, 2020<br><br>May 27 (published)<br><br>USA<br><br>Retrospective cohort<br><br>Mar 1-Apr 11;<br>Follow-up to May 7 for mortality | Adults attending integrated-delivery health system who tested positive for SARS-CoV-2<br><br>N=3,481<br><br>54 (17)<br><br>40%                                       | PCR           | Pre-existing condition (Charlson Comorbidity Index score, obesity);<br>Place of residence (residence in low-income area);<br>Race/ethnicity;<br>Sex;<br>Age | Rate of hospitalization;<br>Mortality (in-hospital) | Good;<br>No major concerns                                                                                                                                                              |
| 27<br>28<br>29<br>30<br>31<br>32<br>33<br>34<br>35<br>36       | Public Health England<br><br>June (published)<br><br>UK<br><br>Retrospective cohort<br><br>Mar 20-May 13                                         | Patients admitted to hospital (ward or critical care) with COVID-19<br><br>N=130,091<br><br>No aggregate data for age (range 2% at <20 y to 29% at ≥80 y)<br><br>47% | Lab-confirmed | Race/ethnicity;<br>SES (deprivation);<br>Sex;<br>Age                                                                                                        | Mortality                                           | Fair;<br>No adjustment for pre-existing condition(s), and data for risk factors are derived from a 2011 census with some missing data for sex (n=10), age (n=38), and ethnicity (2,024) |
| 37<br>38<br>39<br>40<br>41<br>42                               | Shah V, 2020<br><br>June 11 (accepted)<br><br>UK                                                                                                 | Haemato-oncology patients and patients without underlying haematological malignancies (first 80) admitted to the hospital with COVID-19                              | RT-PCR        | Sex;<br>Age                                                                                                                                                 | Mortality                                           | Fair;<br>Adjusted for age and sex only, and no explanation of discrepancy in cohort                                                                                                     |

|                                                                                       |                                                                                                                              |                                                                                                                                                                                                                                                                                                                                                                                        |                                        |                                                                                                                                                                                                                                                                                                                              |                                       |                                             |
|---------------------------------------------------------------------------------------|------------------------------------------------------------------------------------------------------------------------------|----------------------------------------------------------------------------------------------------------------------------------------------------------------------------------------------------------------------------------------------------------------------------------------------------------------------------------------------------------------------------------------|----------------------------------------|------------------------------------------------------------------------------------------------------------------------------------------------------------------------------------------------------------------------------------------------------------------------------------------------------------------------------|---------------------------------------|---------------------------------------------|
| 1<br>2<br>3<br>4<br>5<br>6<br>7<br>8                                                  | Retrospective cohort<br>Until April 15;<br>Follow-up of 30 days                                                              | N=1,183<br><br>Median 71 (IQR 57-82)<br><br>58%                                                                                                                                                                                                                                                                                                                                        |                                        |                                                                                                                                                                                                                                                                                                                              |                                       | sample size change during study (80 and 68) |
| 9<br>10<br>11<br>12<br>13<br>14<br>15<br>16<br>17<br>18<br>19<br>20<br>21<br>22<br>23 | Singh S, 2020 (#121)<br>June 2 (accepted)<br><br>USA<br><br>Retrospective cohort<br><br>Jan 20-May 26                        | Inflammatory bowel disease (IBD) patients diagnosed with COVID-19 and patients diagnosed with COVID-19 and who had no history of or documentation of a diagnosis of IBD ever were included in the non-IBD control group.<br><br>N=464<br><br>No aggregate data for age (IBD vs. non-IBD: mean 51 y [18] vs. 50 y [19])<br><br>No aggregate data for sex (IBD vs. non-IBD: 37% vs. 45%) | Lab-confirmed or ICD code for COVID-19 | Pre-existing condition (obesity, essential hypertension, chronic lower respiratory diseases [asthma and chronic obstructive pulmonary disease], diabetes, ischemic heart disease, chronic kidney disease, heart failure, cerebrovascular disease);<br>Race/ethnicity;<br>Sex;<br>Age;<br>Other factors (nicotine dependency) | Rate of hospitalization;<br>Mortality | Good;<br>No major concerns                  |
| 24<br>25<br>26<br>27<br>28<br>29<br>30<br>31<br>32<br>33<br>34<br>35                  | Singh S, 2020 (#1201)<br>Apr 28 (accepted)<br><br>USA<br><br>Retrospective cohort<br><br>Apr 12 (search for patient records) | Patients ≥10 years old with COVID-19, with and without pre-existing liver disease, who presented to a health care organization<br><br>N=2,780<br><br>No aggregate data for age (liver disease vs. non-liver disease: mean 55 y [15] vs. 52 y [18])<br><br>38%                                                                                                                          | ICD codes per CDC guidelines           | Pre-existing condition (obesity, diabetes, hypertension, liver disease with cirrhosis, liver disease without cirrhosis);<br>Race/ethnicity;<br>Age;<br>Other factors (nicotine use)                                                                                                                                          | Rate of hospitalisation;<br>Mortality | Good;<br>No major concerns                  |
| 36<br>37<br>38<br>39<br>40                                                            | Violi F, 2020<br>June 22 (published)<br><br>Italy                                                                            | Consecutively hospitalized adult (≥18 years) patients with laboratory-confirmed COVID-19 and severe acute respiratory syndrome coronavirus-2 (SARS-CoV2)-related                                                                                                                                                                                                                       | RT-PCR                                 | Pre-existing condition (heart failure);<br>Age                                                                                                                                                                                                                                                                               | Mortality (in-hospital)               | Good;<br>No major concerns                  |

|                                                                                                    |                                                                                                                                                                                                                                        |  |  |  |  |
|----------------------------------------------------------------------------------------------------|----------------------------------------------------------------------------------------------------------------------------------------------------------------------------------------------------------------------------------------|--|--|--|--|
| <p>Retrospective cohort</p> <p>Mar-Apr;<br/>Follow-up of 19 days<br/>(median, IQR: 12–27 days)</p> | <p>pneumonia, requiring or not mechanical ventilation.</p> <p>N=319</p> <p>No aggregate data for age (survivors vs. non-survivors: mean 66 y vs. 77 y)</p> <p>No aggregate data for sex (survivors vs. non-survivors: 58% vs. 70%)</p> |  |  |  |  |
|----------------------------------------------------------------------------------------------------|----------------------------------------------------------------------------------------------------------------------------------------------------------------------------------------------------------------------------------------|--|--|--|--|

<sup>1</sup> values for age are mean (SD), unless otherwise denoted

<sup>2</sup> risk factors adjusted for in multivariate analysis may differ for outcome(s) reported within a study

CDC: Centers for Disease Control and Prevention; COVID-19: novel coronavirus; ICD: International Classification of Diseases; IQR: interquartile range; MV: mechanical ventilation; RT-PCR/PCR: reverse transcriptase polymerase chain reaction/polymerase chain reaction; SD: standard deviation; SES: socio-economic status; UK: United Kingdom; USA: United States of America; vs.: versus; y: year(s)

review only

**Supplement 5.** All results data from the included studies**Contents**

| <b>Table</b> | <b>P<sup>2</sup>ROGRESS and Other Factors</b>             | <b>Page</b> |
|--------------|-----------------------------------------------------------|-------------|
| 1            | Pre-existing condition: Body mass index and weight        | 85          |
| 2            | Pre-existing condition: Pre-existing disease, unspecified | 87          |
| 3            | Pre-existing condition: Respiratory disease               | 88          |
| 4            | Pre-existing condition: Cardiovascular disease            | 90          |
| 5            | Pre-existing condition: Endocrine disease                 | 92          |
| 6            | Pre-existing condition: Hepatic disease                   | 93          |
| 7            | Pre-existing condition: Renal disease                     | 94          |
| 8            | Pre-existing condition: Gastrointestinal disease          | 95          |
| 9            | Pre-existing condition: Neurological disease              | 96          |
| 10           | Pre-existing condition: Malignancy                        | 97          |
| 11           | Pre-existing condition: Immunocompromised                 | 98          |
| 12           | Pre-existing condition: Mental health                     | 99          |
| 13           | Place/state of residence                                  | 100         |
| 14           | Race/ethnicity                                            | 101         |
| 15           | Occupation                                                | 103         |
| 16           | Gender identity/sex                                       | 104         |
| 17           | Education/literacy level                                  | 106         |
| 18           | Socio-economic status                                     | 107         |
| 19           | Age                                                       | 109         |
| 20           | Other                                                     | 112         |



Table 1. Body mass index (BMI) and weight

| Risk factor;<br>Outcome among<br>population                                    | Study                           | Total<br>number of<br>patients | Adjusted<br>odds<br>ratio* | 95% CI<br>lower<br>bound | 95% CI<br>upper<br>bound | p-value          | Quality<br>rating |
|--------------------------------------------------------------------------------|---------------------------------|--------------------------------|----------------------------|--------------------------|--------------------------|------------------|-------------------|
| <b>BMI unspecified</b>                                                         |                                 |                                |                            |                          |                          |                  |                   |
| <b>Hospitalization</b>                                                         |                                 |                                |                            |                          |                          |                  |                   |
| community sample                                                               | Lassale C (UK; pc)              | 340,966                        | <b>1.03</b>                | <b>1.02</b>              | <b>1.05</b>              | <b>&lt;0.001</b> | Fair              |
| community sample                                                               | Patel AP (UK; pc)               | 418,794                        | <b>1.04</b>                | <b>1.03</b>              | <b>1.06</b>              | <b>&lt;0.001</b> | Fair              |
| <b>Underweight (BMI &lt;18.5) vs. normal weight (BMI &lt;25)</b>               |                                 |                                |                            |                          |                          |                  |                   |
| <b>ICU admission</b>                                                           |                                 |                                |                            |                          |                          |                  |                   |
| hospitalized with COVID-19                                                     | Hajifathalian (USA; rc)<br>#163 | 770                            | aRR 0.68                   | 0.21                     | 2.17                     | 0.519            | Fair              |
| <b>Mechanical ventilation</b>                                                  |                                 |                                |                            |                          |                          |                  |                   |
| hospitalized with COVID-19                                                     | Hajifathalian (USA; rc)<br>#163 | 770                            | aRR 0.48                   | 0.11                     | 2.12                     | 0.333            | Fair              |
| hospitalized with COVID-19                                                     | Palaiodimos L (USA; rc)         | 200                            | 0.76                       | 0.26                     | 2.22                     | 0.613            | Good              |
| <b>Mortality</b>                                                               |                                 |                                |                            |                          |                          |                  |                   |
| hospitalized with COVID-19                                                     | Hajifathalian (USA; rc)<br>#163 | 770                            | aRR 1.64                   | 0.84                     | 3.19                     | 0.145            | Fair              |
| hospitalized with COVID-19                                                     | Palaiodimos L (USA; rc)         | 200                            | 1.37                       | 0.52                     | 3.64                     | 0.527            | Good              |
| <b>Overweight (BMI 25-29.9) vs. normal weight (BMI &lt;25)**</b>               |                                 |                                |                            |                          |                          |                  |                   |
| <b>Hospitalization</b>                                                         |                                 |                                |                            |                          |                          |                  |                   |
| community sample positive<br>for COVID-19                                      | Hamer (UK; pc)                  | 387,109                        | <b>aRR 1.32</b>            | <b>1.09</b>              | <b>1.6</b>               | <b>NR</b>        | Fair              |
| positive for COVID-19                                                          | Petrilli CM (USA; pc)           | 5,279                          | <b>1.3</b>                 | <b>1.07</b>              | <b>1.57</b>              | <b>0.007</b>     | Good              |
| <b>Severe disease</b>                                                          |                                 |                                |                            |                          |                          |                  |                   |
| hospitalized with COVID-19                                                     | Petrilli CM (USA; pc)           | 2,725                          | 0.94                       | 0.73                     | 1.2                      | 0.65             | Good              |
| <b>ICU admission</b>                                                           |                                 |                                |                            |                          |                          |                  |                   |
| hospitalized with COVID-19                                                     | Busetto L (Italy; rc)           | 92                             | <b>11.65</b>               | <b>3.88</b>              | <b>34.96</b>             | <b>&lt;0.001</b> | Fair              |
| hospitalized with COVID-19                                                     | Kalligeros M (USA; rc)          | 103                            | 2.27                       | 0.59                     | 8.83                     | 0.235            | Good              |
| <b>Mechanical ventilation</b>                                                  |                                 |                                |                            |                          |                          |                  |                   |
| ventilation (non-invasive +<br>mechanical) among<br>hospitalized with COVID-19 | Busetto L (Italy; rc)           | 92                             | <b>4.19</b>                | <b>1.36</b>              | <b>12.89</b>             | <b>0.012</b>     | Fair              |
| hospitalized with COVID-19                                                     | Kalligeros M (USA; rc)          | 103                            | 3.7                        | 0.6                      | 22.87                    | 0.159            | Good              |
| <b>Mortality</b>                                                               |                                 |                                |                            |                          |                          |                  |                   |
| hospitalized with COVID-19                                                     | Busetto L (Italy; rc)           | 92                             | 0.27                       | 0.03                     | 2.05                     | 0.204            | Fair              |
| hospitalized with COVID-19                                                     | Petrilli CM (USA; pc)           | 2,725                          | 1.01                       | 0.82                     | 1.25                     | 0.94             | Good              |
| <b>Obese class I or greater (BMI ≥30) vs. normal weight (BMI &lt;30)**</b>     |                                 |                                |                            |                          |                          |                  |                   |
| <b>Hospitalization</b>                                                         |                                 |                                |                            |                          |                          |                  |                   |
| community sample positive<br>for COVID-19                                      | Hamer (UK; pc)                  | 387,109                        | <b>aRR 1.97</b>            | <b>1.61</b>              | <b>2.42</b>              | <b>NR</b>        | Fair              |
| positive for COVID-19                                                          | Price-Haywood EG (USA;<br>rc)   | 3,481                          | <b>1.43</b>                | <b>1.2</b>               | <b>1.71</b>              | <b>NR</b>        | Fair              |
| positive for COVID-19                                                          | Petrilli CM (USA; pc)           | 5,279                          | <b>1.8</b>                 | <b>1.47</b>              | <b>2.2</b>               | <b>&lt;0.001</b> | Good              |
| <b>Severe disease</b>                                                          |                                 |                                |                            |                          |                          |                  |                   |
| hospitalized with COVID-19                                                     | Petrilli CM (USA; pc)           | 2,725                          | 1.11                       | 0.85                     | 1.5                      | 0.44             | Good              |

| Risk factor;<br>Outcome among<br>population                       | Study                           | Total<br>number of<br>patients | Adjusted<br>odds<br>ratio* | 95% CI<br>lower<br>bound | 95% CI<br>upper<br>bound | p-value          | Quality<br>rating |
|-------------------------------------------------------------------|---------------------------------|--------------------------------|----------------------------|--------------------------|--------------------------|------------------|-------------------|
| <b>ICU admission</b>                                              |                                 |                                |                            |                          |                          |                  |                   |
| hospitalized with COVID-19                                        | Hajifathalian (USA; rc)<br>#163 | 770                            | <b>aRR 1.76</b>            | <b>1.24</b>              | <b>2.48</b>              | <b>0.001</b>     | Fair              |
| hospitalized with COVID-19<br>(BMI 30-34.9)                       | Kalligeros M (USA; rc)          | 103                            | 2.65                       | 0.64                     | 10.95                    | 0.178            | Good              |
| hospitalized with COVID-19<br>(BMI ≥35)                           | Kalligeros M (USA; rc)          | 103                            | <b>5.39</b>                | <b>1.13</b>              | <b>25.64</b>             | <b>0.034</b>     | Good              |
| <b>Mechanical ventilation</b>                                     |                                 |                                |                            |                          |                          |                  |                   |
| hospitalized with COVID-19                                        | Hajifathalian (USA; rc)<br>#163 | 770                            | <b>aRR 1.72</b>            | <b>1.22</b>              | <b>2.44</b>              | <b>0.002</b>     | Fair              |
| hospitalized with COVID-19                                        | Kalligeros M (USA; rc)          | 103                            | <b>6.85</b>                | <b>1.05</b>              | <b>44.82</b>             | <b>0.045</b>     | Good              |
| hospitalized with COVID-19                                        | Hur K (USA; rc)                 | 486                            | 1.46                       | 0.87                     | 2.46                     | 0.151            | Good              |
| hospitalized with COVID-19                                        | Kalligeros M (USA; rc)          | 103                            | <b>9.99</b>                | <b>1.39</b>              | <b>71.69</b>             | <b>0.022</b>     | Good              |
| hospitalized with COVID-19                                        | Palaiodimos L (USA; rc)         | 200                            | <b>3.87</b>                | <b>1.47</b>              | <b>10.18</b>             | <b>0.006</b>     | Good              |
| <b>Mortality</b>                                                  |                                 |                                |                            |                          |                          |                  |                   |
| hospitalized with COVID-19                                        | Hajifathalian (USA; rc)<br>#163 | 770                            | aRR 1.15                   | 0.62                     | 2.14                     | 0.663            | Fair              |
| hospitalized with COVID-19                                        | Giacomelli A (Italy; pc)        | 233                            | <b>aHR 3.04</b>            | <b>1.42</b>              | <b>6.49</b>              | <b>0.004</b>     | Good              |
| hospitalized with COVID-19                                        | Price-Haywood EG (USA;<br>rc)   | 1,382                          | aHR 0.99                   | 0.77                     | 1.27                     | NR               | Fair              |
| hospitalized with COVID-19,<br>≤50 y                              | Klang E (USA; rc)               | 572                            | 1.1                        | 0.5                      | 2.3                      | 0.755            | Fair              |
| hospitalized with COVID-19,<br>>50 y                              | Klang E (USA; rc)               | 2,834                          | 1.1                        | 0.9                      | 1.3                      | 0.421            | Fair              |
| hospitalized with COVID-19                                        | Petrilli CM (USA; pc)           | 2,725                          | 1.08                       | 0.87                     | 1.36                     | 0.48             | Good              |
| hospitalized with COVID-19                                        | Palaiodimos L (USA; rc)         | 200                            | <b>3.78</b>                | <b>1.45</b>              | <b>9.83</b>              | <b>0.006</b>     | Good              |
| <b>Mortality</b>                                                  |                                 |                                |                            |                          |                          |                  |                   |
| hospitalized with COVID-19                                        | Petrilli CM (USA; pc)           | 2,725                          | 1.45                       | 0.99                     | 2.13                     | 0.05             | Good              |
| <b>Obese class III (BMI ≥40) vs. normal weight (BMI &lt;25)**</b> |                                 |                                |                            |                          |                          |                  |                   |
| <b>Hospitalization</b>                                            |                                 |                                |                            |                          |                          |                  |                   |
| positive for COVID-19                                             | Petrilli CM (USA; pc)           | 5,279                          | <b>2.45</b>                | <b>1.78</b>              | <b>3.36</b>              | <b>&lt;0.001</b> | Good              |
| <b>Severe disease</b>                                             |                                 |                                |                            |                          |                          |                  |                   |
| hospitalized with COVID-19                                        | Petrilli CM (USA; pc)           | 2,725                          | <b>1.71</b>                | <b>1.1</b>               | <b>2.7</b>               | <b>0.02</b>      | Good              |
| <b>Mechanical ventilation</b>                                     |                                 |                                |                            |                          |                          |                  |                   |
| hospitalized with COVID-19                                        | Hur K (USA; rc)                 | 486                            | 1.92                       | 0.92                     | 4                        | 0.08             | Good              |
| <b>Mortality</b>                                                  |                                 |                                |                            |                          |                          |                  |                   |
| hospitalized with COVID-19                                        | Petrilli CM (USA; pc)           | 2,725                          | <b>1.45</b>                | <b>0.99</b>              | <b>2.13</b>              | <b>0.05</b>      | Good              |
| hospitalized with COVID-19,<br>≤50 y                              | Klang E (USA; rc)               | 572                            | <b>5.1</b>                 | <b>2.3</b>               | <b>11.1</b>              | <b>&lt;0.001</b> | Fair              |
| hospitalized with COVID-19,<br>>50 y                              | Klang E (USA; rc)               | 2,834                          | <b>1.6</b>                 | <b>1.2</b>               | <b>2.3</b>               | <b>0.004</b>     | Fair              |

\* values are adjusted odds ratio, unless otherwise denoted

\*\* the reference category differs slightly across studies

aHR: adjusted hazards ratio; aRR: adjusted risk ratio; BMI: body mass index; CI: confidence interval; COVID-19: novel coronavirus disease 2019; ICU: intensive care unit; NR: not reported; pc: prospective cohort; rc: retrospective cohort; UK: United Kingdom; USA: United States of America; y: year(s)

**Table 2. Pre-existing disease, unspecified**

| Risk factor;<br>Outcome among<br>population                       | Study                           | Total<br>number of<br>patients | Adjusted<br>odds<br>ratio* | 95% CI<br>lower<br>bound | 95% CI<br>upper<br>bound | p-value          | Quality<br>rating |
|-------------------------------------------------------------------|---------------------------------|--------------------------------|----------------------------|--------------------------|--------------------------|------------------|-------------------|
| <b>CCI score</b>                                                  |                                 |                                |                            |                          |                          |                  |                   |
| <b>Hospitalization</b>                                            |                                 |                                |                            |                          |                          |                  |                   |
| positive for COVID-19                                             | Price-Haywood EG (USA; rc)      | 3,481                          | <b>aHR 1.05</b>            | <b>1</b>                 | <b>1.1</b>               | <b>NR</b>        | Good              |
| <b>Severe disease</b>                                             |                                 |                                |                            |                          |                          |                  |                   |
| ICU transfer or death (composite) among hospitalized for COVID-19 | Piano S (Italy)                 | 565                            | <b>1.21</b>                | <b>1.03</b>              | <b>1.42</b>              | <b>0.021</b>     | Good              |
| <b>Mortality</b>                                                  |                                 |                                |                            |                          |                          |                  |                   |
| hospitalized with COVID-19                                        | Price-Haywood EG (USA; rc)      | 1,382                          | aHR 0.99                   | 0.95                     | 1.04                     | NR               | Good              |
| hospitalized with COVID-19                                        | Imam (USA; rc)                  | 1,305                          | <b>2.71</b>                | <b>1.85</b>              | <b>3.97</b>              | <b>&lt;0.001</b> | Fair              |
| <b>Number of comorbidities</b>                                    |                                 |                                |                            |                          |                          |                  |                   |
| <b>Severe disease</b>                                             |                                 |                                |                            |                          |                          |                  |                   |
| ICU or death (composite) among positive for COVID-19              | Hajifathalian K (USA; rc) #1154 | 1,059                          | <b>1.19</b>                | <b>NR</b>                | <b>NR</b>                | <b>0.021</b>     | Fair              |

\* values are adjusted odds ratio, unless otherwise denoted

aHR: adjusted hazards ratio; CCI: Charlson Comorbidity Index; CI: confidence interval; COVID-19: novel coronavirus disease 2019; ICU: intensive care unit; NR: not reported; rc: retrospective cohort; USA: United States of America; y: year(s)

Table 3. Respiratory disease

| Risk factor;<br>Outcome among<br>population                                                                                                      | Study                   | Total<br>number of<br>patients | Adjusted<br>odds<br>ratio* | 95% CI<br>lower<br>bound | 95% CI<br>upper<br>bound | p-value          | Quality<br>rating |
|--------------------------------------------------------------------------------------------------------------------------------------------------|-------------------------|--------------------------------|----------------------------|--------------------------|--------------------------|------------------|-------------------|
| <b>Asthma</b>                                                                                                                                    |                         |                                |                            |                          |                          |                  |                   |
| <b>Hospitalization</b>                                                                                                                           |                         |                                |                            |                          |                          |                  |                   |
| positive for COVID-19                                                                                                                            | Azar K (USA; rc)        | 1,052                          | 1.52                       | 0.89                     | 2.58                     | >0.05            | Good              |
| <b>Asthma or COPD</b>                                                                                                                            |                         |                                |                            |                          |                          |                  |                   |
| <b>Hospitalization</b>                                                                                                                           |                         |                                |                            |                          |                          |                  |                   |
| positive for COVID-19                                                                                                                            | Petrilli CM (USA; pc)   | 5,279                          | 1.08                       | 0.88                     | 1.33                     | 0.47             | Good              |
| <b>Severe disease</b>                                                                                                                            |                         |                                |                            |                          |                          |                  |                   |
| hospitalized with COVID-19                                                                                                                       | Petrilli CM (USA; pc)   | 2,725                          | 0.99                       | 0.76                     | 1.3                      | 0.93             | Good              |
| <b>Mortality</b>                                                                                                                                 |                         |                                |                            |                          |                          |                  |                   |
| hospitalized with COVID-19                                                                                                                       | Petrilli CM (USA; pc)   | 2,725                          | 1.03                       | 0.83                     | 1.29                     | 0.76             | Good              |
| <b>Chronic pulmonary disease or COPD</b>                                                                                                         |                         |                                |                            |                          |                          |                  |                   |
| <b>Hospitalization</b>                                                                                                                           |                         |                                |                            |                          |                          |                  |                   |
| positive for COVID-19                                                                                                                            | Azar K (USA; rc)        | 1,052                          | 1.8                        | 0.75                     | 4.34                     | >0.05            | Good              |
| community sample                                                                                                                                 | Patel AP (UK; pc)       | 418,794                        | <b>1.51</b>                | <b>1</b>                 | <b>2.28</b>              | <b>0.05</b>      | Fair              |
| <b>Mortality</b>                                                                                                                                 |                         |                                |                            |                          |                          |                  |                   |
| hospitalized with COVID-19                                                                                                                       | Docherty AB (UK; pc)    | 20,133                         | <b>aHR 1.17</b>            | <b>1.09</b>              | <b>1.27</b>              | <b>&lt;0.001</b> | Good              |
| hospitalized with COVID-19                                                                                                                       | Palaiodimos L (USA; rc) | 200                            | 2.05                       | 0.76                     | 5.51                     | 0.156            | Good              |
| <b>Chronic bronchitis</b>                                                                                                                        |                         |                                |                            |                          |                          |                  |                   |
| <b>Hospitalization</b>                                                                                                                           |                         |                                |                            |                          |                          |                  |                   |
| community sample                                                                                                                                 | Lassale C (UK; pc)      | 340,966                        | 1.34                       | 0.81                     | 2.21                     | 0.259            | Fair              |
| <b>Obstructive sleep apnea</b>                                                                                                                   |                         |                                |                            |                          |                          |                  |                   |
| <b>Mechanical ventilation</b>                                                                                                                    |                         |                                |                            |                          |                          |                  |                   |
| hospitalized with COVID-19                                                                                                                       | Palaiodimos L (USA; rc) | 200                            | 1.15                       | 0.4                      | 3.35                     | 0.791            | Good              |
| <b>Pneumonia, previous</b>                                                                                                                       |                         |                                |                            |                          |                          |                  |                   |
| <b>Hospitalization</b>                                                                                                                           |                         |                                |                            |                          |                          |                  |                   |
| community sample                                                                                                                                 | Patel AP (UK; pc)       | 418,794                        | 1.31                       | 0.83                     | 2.05                     | 0.25             | Fair              |
| <b>Other respiratory disease (includes one or more of: asthma, COPD, lung disease, interstitial lung disease, and/or pulmonary hypertension)</b> |                         |                                |                            |                          |                          |                  |                   |
| <b>ICU admission</b>                                                                                                                             |                         |                                |                            |                          |                          |                  |                   |
| hospitalized with COVID-19<br>(includes heart failure,<br>coronary artery disease and<br>cardiomyopathy)                                         | Kalligeros M (USA; rc)  | 103                            | 1.5                        | 0.47                     | 4.82                     | 0.495            | Good              |
| <b>Mechanical ventilation</b>                                                                                                                    |                         |                                |                            |                          |                          |                  |                   |
| hospitalized with COVID-19<br>(includes heart failure,<br>coronary artery disease and<br>cardiomyopathy)                                         | Kalligeros M (USA; rc)  | 103                            | 0.76                       | 0.2                      | 2.86                     | 0.687            | Good              |
| <b>Mortality</b>                                                                                                                                 |                         |                                |                            |                          |                          |                  |                   |
| hospitalized with COVID-19<br>(chronic cardiac disease or<br>congestive heart failure)                                                           | Cummings MJ (USA; pc)   | 257                            | <b>aHR 2.94</b>            | <b>1.48</b>              | <b>5.84</b>              | <b>NR</b>        | Good              |

1  
2  
3  
4  
5  
6  
7  
8  
9  
10  
11  
12  
13  
14  
15  
16  
17  
18  
19  
20  
21  
22  
23  
24  
25  
26  
27  
28  
29  
30  
31  
32  
33  
34  
35  
36  
37  
38  
39  
40  
41  
42  
43  
44  
45  
46  
47  
48  
49  
50  
51  
52  
53  
54  
55  
56  
57  
58  
59  
60

\* values are adjusted odds ratio, unless otherwise denoted  
aHR: adjusted hazards ratio; CI: confidence interval; COPD=Chronic obstructive pulmonary disease; COVID-19:  
novel coronavirus disease 2019; ICU: intensive care unit; NR: not reported; pc: prospective cohort; rc: retrospective  
cohort; UK: United Kingdom; USA: United States of America

For peer review only

Table 4. Cardiovascular disease

| Risk factor;<br>Outcome among<br>population                              | Study                   | Total<br>number of<br>patients | Adjusted<br>odds<br>ratio* | 95%<br>CI<br>lower<br>bound | 95%<br>CI<br>upper<br>bound | p-value          | Quality<br>rating |
|--------------------------------------------------------------------------|-------------------------|--------------------------------|----------------------------|-----------------------------|-----------------------------|------------------|-------------------|
| <b>Cardiovascular disease</b>                                            |                         |                                |                            |                             |                             |                  |                   |
| <b>Hospitalization</b>                                                   |                         |                                |                            |                             |                             |                  |                   |
| community sample                                                         | Lassale C (UK; pc)      | 340,966                        | <b>1.06</b>                | <b>0.79</b>                 | <b>1.42</b>                 | <b>0.001</b>     | Fair              |
| positive for COVID-19                                                    | Azar K (USA; rc)        | 1,052                          | 1.32                       | 0.75                        | 2.32                        | >0.05            | Good              |
| <b>Heart failure</b>                                                     |                         |                                |                            |                             |                             |                  |                   |
| <b>Hospitalization</b>                                                   |                         |                                |                            |                             |                             |                  |                   |
| positive for COVID-19                                                    | Azar K (USA; rc)        | 1,052                          | <b>3.34</b>                | <b>1.49</b>                 | <b>7.52</b>                 | <b>&lt;0.001</b> | Good              |
| community sample                                                         | Patel AP (UK; pc)       | 418,794                        | 1.09                       | 0.56                        | 2.14                        | 0.79             | Fair              |
| positive for COVID-19                                                    | Petrilli CM (USA; pc)   | 5,279                          | <b>4.43</b>                | <b>2.59</b>                 | <b>8.04</b>                 | <b>&lt;0.001</b> | Good              |
| <b>Severe disease</b>                                                    |                         |                                |                            |                             |                             |                  |                   |
| hospitalized with COVID-19                                               | Petrilli CM (USA; pc)   | 2,725                          | <b>1.93</b>                | <b>1.4</b>                  | <b>2.6</b>                  | <b>&lt;0.001</b> | Good              |
| <b>Mortality</b>                                                         |                         |                                |                            |                             |                             |                  |                   |
| hospitalized with COVID-19                                               | Palaiodimos L (USA; rc) | 200                            | 1.43                       | 0.5                         | 4.06                        | 0.501            | Good              |
| hospitalized with COVID-19                                               | Petrilli CM (USA; pc)   | 2,725                          | <b>1.54</b>                | <b>1.23</b>                 | <b>1.93</b>                 | <b>&lt;0.001</b> | Good              |
| <b>Coronary artery disease (includes coronary heart disease)</b>         |                         |                                |                            |                             |                             |                  |                   |
| <b>Hospitalization</b>                                                   |                         |                                |                            |                             |                             |                  |                   |
| community sample                                                         | Patel AP (UK; pc)       | 418,794                        | 0.95                       | 0.67                        | 1.36                        | 0.79             | Fair              |
| positive for COVID-19                                                    | Petrilli CM (USA; pc)   | 5,279                          | 1.08                       | 0.81                        | 1.44                        | 0.6              | Good              |
| <b>Severe disease</b>                                                    |                         |                                |                            |                             |                             |                  |                   |
| hospitalized with COVID-19                                               | Petrilli CM (USA; pc)   | 2,725                          | 0.92                       | 0.71                        | 1.2                         | 0.56             | Good              |
| ICU transfer or death<br>(composite) among<br>hospitalized with COVID-19 | Cecconi M (Italy; rc)   | 239                            | <b>aHR 2.02</b>            | <b>1.13</b>                 | <b>3.64</b>                 | <b>0.018</b>     | Fair              |
| <b>Mortality</b>                                                         |                         |                                |                            |                             |                             |                  |                   |
| hospitalized with COVID-19                                               | Palaiodimos L (USA; rc) | 200                            | 1.53                       | 0.54                        | 4.34                        | 0.421            | Good              |
| hospitalized with COVID-19                                               | Petrilli CM (USA; pc)   | 2,725                          | 1.1                        | 0.9                         | 1.35                        | 0.36             | Good              |
| <b>Hyperlipidemia</b>                                                    |                         |                                |                            |                             |                             |                  |                   |
| <b>Hospitalization</b>                                                   |                         |                                |                            |                             |                             |                  |                   |
| positive for COVID-19                                                    | Petrilli CM (USA; pc)   | 5,279                          | <b>0.62</b>                | <b>0.52</b>                 | <b>0.74</b>                 | <b>&lt;0.001</b> | Good              |
| <b>Severe disease</b>                                                    |                         |                                |                            |                             |                             |                  |                   |
| hospitalized with COVID-19                                               | Petrilli CM (USA; pc)   | 2,725                          | 0.93                       | 0.75                        | 1.2                         | 0.51             | Good              |
| <b>Mechanical ventilation</b>                                            |                         |                                |                            |                             |                             |                  |                   |
| hospitalized with COVID-19                                               | Palaiodimos L (USA; rc) | 200                            | 1.66                       | 0.78                        | 3.55                        | 0.188            | Good              |
| <b>Mortality</b>                                                         |                         |                                |                            |                             |                             |                  |                   |
| hospitalized with COVID-19                                               | Petrilli CM (USA; pc)   | 2,725                          | 0.98                       | 0.82                        | 1.17                        | 0.79             | Good              |
| <b>Hypertension</b>                                                      |                         |                                |                            |                             |                             |                  |                   |
| <b>Hospitalization</b>                                                   |                         |                                |                            |                             |                             |                  |                   |
| community sample                                                         | Lassale C (UK; pc)      | 340,966                        | 0.98                       | 0.82                        | 1.17                        | 0.84             | Fair              |

| Risk factor;<br>Outcome among<br>population                                                                                                                      | Study                  | Total<br>number of<br>patients | Adjusted<br>odds<br>ratio* | 95%<br>CI<br>lower<br>bound | 95%<br>CI<br>upper<br>bound | p-value          | Quality<br>rating |
|------------------------------------------------------------------------------------------------------------------------------------------------------------------|------------------------|--------------------------------|----------------------------|-----------------------------|-----------------------------|------------------|-------------------|
| community sample                                                                                                                                                 | Patel AP (UK; pc)      | 418,794                        | 1.12                       | 0.9                         | 1.39                        | 0.32             | Fair              |
| positive for COVID-19                                                                                                                                            | Azar K (USA; rc)       | 1,052                          | 1.4                        | 0.93                        | 2.1                         | >0.05            | Good              |
| positive for COVID-19                                                                                                                                            | Petrilli CM (USA; pc)  | 5,279                          | <b>1.78</b>                | <b>1.49</b>                 | <b>2.12</b>                 | <b>&lt;0.001</b> | Good              |
| <b>Severe disease</b>                                                                                                                                            |                        |                                |                            |                             |                             |                  |                   |
| hospitalized with COVID-19                                                                                                                                       | Petrilli CM (USA; pc)  | 2,725                          | 0.96                       | 0.75                        | 1.2                         | 0.76             | Good              |
| <b>ICU admission</b>                                                                                                                                             |                        |                                |                            |                             |                             |                  |                   |
| hospitalized with COVID-19                                                                                                                                       | Kalligeros M (USA; rc) | 103                            | 0.79                       | 0.27                        | 2.28                        | 0.663            | Good              |
| <b>Mechanical ventilation</b>                                                                                                                                    |                        |                                |                            |                             |                             |                  |                   |
| hospitalized with COVID-19                                                                                                                                       | Kalligeros M (USA; rc) | 103                            | 0.47                       | 0.13                        | 1.66                        | 0.242            | Good              |
| <b>Mortality</b>                                                                                                                                                 |                        |                                |                            |                             |                             |                  |                   |
| hospitalized with COVID-19                                                                                                                                       | Cummings MJ (USA; pc)  | 257                            | aHR 1.58                   | 0.89                        | 2.81                        | NR               | Good              |
| hospitalized with COVID-19                                                                                                                                       | Petrilli CM (USA; pc)  | 2,725                          | 0.98                       | 0.78                        | 1.23                        | 0.86             | Good              |
| <b>Other cardiovascular disease (includes one or more of: chronic cardiac disease, heart disease, heart failure, coronary artery disease and cardiomyopathy)</b> |                        |                                |                            |                             |                             |                  |                   |
| <b>ICU admission</b>                                                                                                                                             |                        |                                |                            |                             |                             |                  |                   |
| hospitalized with COVID-19                                                                                                                                       | Kalligeros M (USA; rc) | 103                            | 1.52                       | 0.51                        | 4.51                        | 0.448            | Good              |
| <b>Mechanical ventilation</b>                                                                                                                                    |                        |                                |                            |                             |                             |                  |                   |
| hospitalized with COVID-19                                                                                                                                       | Kalligeros M (USA; rc) | 103                            | <b>3.41</b>                | <b>1.05</b>                 | <b>11.06</b>                | <b>0.041</b>     | Good              |
| <b>Mortality</b>                                                                                                                                                 |                        |                                |                            |                             |                             |                  |                   |
| hospitalized with COVID-19                                                                                                                                       | Cummings MJ (USA; pc)  | 257                            | <b>aHR 1.76</b>            | <b>1.08</b>                 | <b>2.86</b>                 | <b>NR</b>        | Good              |
| hospitalized with COVID-19                                                                                                                                       | Docherty AB (UK; pc)   | 20,133                         | <b>aHR 1.16</b>            | <b>1.08</b>                 | <b>1.24</b>                 | <b>&lt;0.001</b> | Good              |
| <b>Ischemic stroke</b>                                                                                                                                           |                        |                                |                            |                             |                             |                  |                   |
| <b>Hospitalization</b>                                                                                                                                           |                        |                                |                            |                             |                             |                  |                   |
| community sample                                                                                                                                                 | Patel AP (UK; pc)      | 418,794                        | 0.94                       | 0.39                        | 2.3                         | 0.90             | Fair              |

\* values are adjusted odds ratio, unless otherwise denoted

aHR: adjusted hazards ratio; CI: confidence interval; COVID-19: novel coronavirus disease 2019; ICU: intensive care unit; NR: not reported; pc: prospective cohort; rc: retrospective cohort; UK: United Kingdom; USA: United States of America

Table 5. Endocrine disease

| Risk factor;<br>Outcome among<br>population | Study                   | Total<br>number<br>of<br>patients | Adjusted<br>odds<br>ratio* | 95% CI<br>lower<br>bound | 95% CI<br>upper<br>bound | p-value          | Quality<br>rating |
|---------------------------------------------|-------------------------|-----------------------------------|----------------------------|--------------------------|--------------------------|------------------|-------------------|
| <b>Diabetes</b>                             |                         |                                   |                            |                          |                          |                  |                   |
| <b>Hospitalization</b>                      |                         |                                   |                            |                          |                          |                  |                   |
| community sample                            | Patel AP (UK; pc)       | 418,794                           | <b>1.52</b>                | <b>1.14</b>              | <b>2.03</b>              | <b>0.01</b>      | Fair              |
| positive for COVID-19                       | Petrilli CM (USA; pc)   | 5,279                             | <b>2.24</b>                | <b>1.84</b>              | <b>2.73</b>              | <b>&lt;0.001</b> | Good              |
| positive for COVID-19                       | Azar K (USA; rc)        | 1,052                             | <b>2.17</b>                | <b>1.33</b>              | <b>3.53</b>              | <b>&lt;0.01</b>  | Fair              |
| <b>Severe disease</b>                       |                         |                                   |                            |                          |                          |                  |                   |
| hospitalized with COVID-19                  | Petrilli CM (USA; pc)   | 2,725                             | 1.23                       | 0.99                     | 1.5                      | 0.06             | Good              |
| <b>ICU admission</b>                        |                         |                                   |                            |                          |                          |                  |                   |
| hospitalized with COVID-19                  | Kalligeros M (USA; rc)  | 103                               | 1.91                       | 0.71                     | 5.19                     | 0.202            | Good              |
| <b>Mechanical ventilation</b>               |                         |                                   |                            |                          |                          |                  |                   |
| hospitalized with COVID-19                  | Hur K (USA; rc)         | 486                               | <b>1.64</b>                | <b>1.02</b>              | <b>2.66</b>              | <b>0.046</b>     | Good              |
| hospitalized with COVID-19                  | Kalligeros M (USA; rc)  | 103                               | 2.13                       | 0.73                     | 6.22                     | 0.168            | Good              |
| hospitalized with COVID-19                  | Palaiodimos L (USA; rc) | 200                               | 1.26                       | 0.58                     | 2.73                     | 0.557            | Good              |
| <b>Mortality</b>                            |                         |                                   |                            |                          |                          |                  |                   |
| hospitalized with COVID-19                  | Cummings MJ (USA; pc)   | 257                               | aHR 1.31                   | 0.81                     | 2.1                      | NR               | Good              |
| hospitalized with COVID-19                  | Docherty AB (UK; pc)    | 20,133                            | aHR 1.06                   | 0.99                     | 1.14                     | 0.087            | Good              |
| hospitalized with COVID-19                  | Palaiodimos L (USA; rc) | 200                               | 1.16                       | 0.55                     | 2.44                     | 0.698            | Good              |
| hospitalized with COVID-19                  | Petrilli CM (USA; pc)   | 2,725                             | 1.01                       | 0.85                     | 1.21                     | 0.87             | Good              |

\* values are adjusted odds ratio, unless otherwise denoted

aHR: adjusted hazards ratio; CI: confidence interval; COVID-19: novel coronavirus disease 2019; ICU: intensive care unit; NR: not reported; pc: prospective cohort; rc: retrospective cohort; UK: United Kingdom; USA: United States of America



**Table 6. Hepatic disease**

| Risk factor;<br>Outcome among<br>population                | Study                      | Total<br>number<br>of<br>patients | Adjusted<br>odds<br>ratio* | 95% CI<br>lower<br>bound | 95% CI<br>upper<br>bound | p-value          | Quality<br>rating |
|------------------------------------------------------------|----------------------------|-----------------------------------|----------------------------|--------------------------|--------------------------|------------------|-------------------|
| <b>Liver disease</b>                                       |                            |                                   |                            |                          |                          |                  |                   |
| <b>Hospitalization</b>                                     |                            |                                   |                            |                          |                          |                  |                   |
| positive for COVID-19                                      | Singh S (USA; rc)<br>#1201 | 464                               | <b>aRR 1.3</b>             | <b>1.1</b>               | <b>1.6</b>               | <b>0.006</b>     | Good              |
| <b>Mortality</b>                                           |                            |                                   |                            |                          |                          |                  |                   |
| hospitalized with COVID-19                                 | Docherty AB (UK; pc)       | 20,133                            | <b>aHR 1.51</b>            | <b>1.21</b>              | <b>1.88</b>              | <b>&lt;0.001</b> | Good              |
| positive for COVID-19                                      | Singh S (USA; rc)<br>#1201 | 464                               | <b>aRR 3.0</b>             | <b>1.5</b>               | <b>6.0</b>               | <b>0.001</b>     | Good              |
| positive for COVID-19<br>(liver disease with<br>cirrhosis) | Singh S (USA; rc)<br>#1201 | 464                               | <b>aRR 4.6</b>             | <b>2.6</b>               | <b>8.3</b>               | <b>&lt;0.001</b> | Good              |

\* values are adjusted odds ratio, unless otherwise denoted

aHR: adjusted hazards ratio; aRR: adjusted risk ratio; CI: confidence interval; COVID-19: novel coronavirus disease 2019; pc: prospective cohort; rc: retrospective cohort; UK: United Kingdom; USA: United States of America

Table 7. Renal disease

| Risk factor;<br>Outcome among<br>population | Study                   | Total<br>number<br>of<br>patients | Adjusted<br>odds<br>ratio* | 95% CI<br>lower<br>bound | 95% CI<br>upper<br>bound | p-value          | Quality<br>rating |
|---------------------------------------------|-------------------------|-----------------------------------|----------------------------|--------------------------|--------------------------|------------------|-------------------|
| <b>Chronic kidney disease</b>               |                         |                                   |                            |                          |                          |                  |                   |
| <b>Hospitalization</b>                      |                         |                                   |                            |                          |                          |                  |                   |
| community sample                            | Patel AP (UK; pc)       | 418,794                           | <b>2.01</b>                | <b>1.19</b>              | <b>3.41</b>              | <b>0.01</b>      | Fair              |
| positive for COVID-19                       | Petrilli CM (USA; pc)   | 5,279                             | <b>2.6</b>                 | <b>1.89</b>              | <b>3.61</b>              | <b>&lt;0.001</b> | Good              |
| <b>Severe disease</b>                       |                         |                                   |                            |                          |                          |                  |                   |
| hospitalized with COVID-19                  | Petrilli CM (USA; pc)   | 2,725                             | <b>0.73</b>                | <b>0.55</b>              | <b>1</b>                 | <b>0.04</b>      | Good              |
| hospitalized with COVID-19                  | Bhargava A (USA; rc)    | 197                               | <b>7.4</b>                 | <b>2.5</b>               | <b>22</b>                | <b>&lt;0.001</b> | Good              |
| <b>Mortality</b>                            |                         |                                   |                            |                          |                          |                  |                   |
| hospitalized with COVID-19                  | Docherty AB (UK; pc)    | 20,133                            | <b>aHR 1.28</b>            | <b>1.18</b>              | <b>1.39</b>              | <b>&lt;0.001</b> | Good              |
| hospitalized with COVID-19                  | Petrilli CM (USA; pc)   | 2,725                             | 0.92                       | 0.73                     | 1.16                     | 0.49             | Good              |
| hospitalized with COVID-19                  | Palaiodimos L (USA; rc) | 200                               | 1.15                       | 0.49                     | 2.68                     | 0.746            | Good              |

\* values are adjusted odds ratio, unless otherwise denoted

aHR: adjusted hazards ratio; CI: confidence interval; COVID-19: novel coronavirus disease 2019; pc: prospective cohort; rc: retrospective cohort; UK: United Kingdom; USA: United States of America

**Table 8. Gastrointestinal disease**

| Risk factor;<br>Outcome among<br>population | Study                     | Total<br>number<br>of<br>patients | Adjusted<br>odds<br>ratio* | 95% CI<br>lower<br>bound | 95% CI<br>upper<br>bound | p-value | Quality<br>rating |
|---------------------------------------------|---------------------------|-----------------------------------|----------------------------|--------------------------|--------------------------|---------|-------------------|
| <b>Irritable bowel disease</b>              |                           |                                   |                            |                          |                          |         |                   |
| <b>Hospitalization</b>                      |                           |                                   |                            |                          |                          |         |                   |
| positive for COVID-19                       | Singh S (USA; rc)<br>#121 | 464                               | aRR 1.10                   | 0.74                     | 1.4                      | 0.91    | Good              |
| <b>Severe disease</b>                       |                           |                                   |                            |                          |                          |         |                   |
| positive for COVID-19                       | Singh S (USA; rc)<br>#121 | 464                               | aRR 0.93                   | 0.68                     | 1.27                     | 0.66    | Good              |

\* values are adjusted odds ratio, unless otherwise denoted

aRR: adjusted risk ratio; CI: confidence interval; COVID-19: novel coronavirus disease 2019; rc: retrospective cohort;

USA: United States of America

**Table 9. Neurological disease**

| Risk factor;<br>Outcome among<br>population                | Study                    | Total<br>number<br>of<br>patients | Adjusted<br>odds<br>ratio* | 95% CI<br>lower<br>bound | 95% CI<br>upper<br>bound | p-value          | Quality<br>rating |
|------------------------------------------------------------|--------------------------|-----------------------------------|----------------------------|--------------------------|--------------------------|------------------|-------------------|
| <b>Alzheimer's disease or dementia</b>                     |                          |                                   |                            |                          |                          |                  |                   |
| <b>Hospitalization</b>                                     |                          |                                   |                            |                          |                          |                  |                   |
| community sample                                           | Patel AP (UK; pc)        | 418,794                           | 5.08                       | 0.7                      | 36.68                    | 0.11             | Fair              |
| <b>Dementia</b>                                            |                          |                                   |                            |                          |                          |                  |                   |
| <b>Mortality</b>                                           |                          |                                   |                            |                          |                          |                  |                   |
| hospitalized with COVID-19                                 | Bianchetti A (Italy; rc) | 627                               | <b>1.84</b>                | <b>1.08</b>              | <b>3.13</b>              | <b>0.024</b>     | Fair              |
| hospitalized with COVID-19 (dementia)                      | Docherty AB (UK; pc)     | 20,133                            | <b>aHR 1.40</b>            | <b>1.28</b>              | <b>1.52</b>              | <b>&lt;0.001</b> | Good              |
| hospitalized with COVID-19                                 | Covino M (Italy; rc)     | 69                                | <b>aHR 3.87</b>            | <b>1.23</b>              | <b>12.17</b>             | <b>0.021</b>     | Fair              |
| hospitalized with COVID-19 (chronic neurological disorder) | Docherty AB (UK; pc)     | 20,133                            | <b>aHR 1.17</b>            | <b>1.06</b>              | <b>1.29</b>              | <b>0.001</b>     | Good              |

\* values are adjusted odds ratio, unless otherwise denoted

\*\* the reference category differs slightly across studies

aHR: adjusted hazards ratio; CI: confidence interval; COVID-19: novel coronavirus disease 2019; pc: prospective cohort; rc: retrospective cohort; UK: United Kingdom

Table 10. Malignancy

| Risk factor;<br>Outcome among<br>population | Study                  | Total<br>number<br>of<br>patients | Adjusted<br>odds<br>ratio* | 95% CI<br>lower<br>bound | 95% CI<br>upper<br>bound | p-value      | Quality<br>rating |
|---------------------------------------------|------------------------|-----------------------------------|----------------------------|--------------------------|--------------------------|--------------|-------------------|
| <b>Cancer or tumor</b>                      |                        |                                   |                            |                          |                          |              |                   |
| <b>Hospitalization</b>                      |                        |                                   |                            |                          |                          |              |                   |
| positive for COVID-19                       | Azar K (USA; rc)       | 1,052                             | 0.96                       | 0.45                     | 2.03                     | >0.05        | Good              |
| positive for COVID-19                       | Petrilli CM (USA; pc)  | 5,279                             | 0.88                       | 0.65                     | 1.19                     | 0.41         | Good              |
| <b>Severe disease</b>                       |                        |                                   |                            |                          |                          |              |                   |
| hospitalized with COVID-19                  | Petrilli CM (USA; pc)  | 2,725                             | 1.3                        | 0.95                     | 1.8                      | 0.1          | Good              |
| hospitalized with COVID-19                  | Colaneri M (Italy; rc) | 44                                | 22.199                     | 0.826                    | 596.15<br>2              | 0.0648       | Good              |
| <b>Mortality</b>                            |                        |                                   |                            |                          |                          |              |                   |
| hospitalized with COVID-19                  | Petrilli CM (USA; pc)  | 2,725                             | <b>1.29</b>                | <b>1.03</b>              | <b>1.62</b>              | <b>0.03</b>  | Good              |
| hospitalized with COVID-19                  | Docherty AB (UK; pc)   | 20,133                            | <b>aHR 1.13</b>            | <b>1.02</b>              | <b>1.24</b>              | <b>0.017</b> | Good              |
| positive for COVID-19                       | Shah V (UK; rc)        | 1,183                             | <b>aHR 1.74</b>            | <b>1.12</b>              | <b>2.71</b>              | <b>0.014</b> | Fair              |
| <b>Hematological cancer - lymphoid</b>      |                        |                                   |                            |                          |                          |              |                   |
| <b>Mortality</b>                            |                        |                                   |                            |                          |                          |              |                   |
| positive for COVID-19                       | Shah V (UK; rc)        | 1,183                             | <b>aHR 1.75</b>            | <b>1.07</b>              | <b>2.87</b>              | <b>0.026</b> | Fair              |
| <b>Hematological cancer - myeloid</b>       |                        |                                   |                            |                          |                          |              |                   |
| <b>Mortality</b>                            |                        |                                   |                            |                          |                          |              |                   |
| positive for COVID-19                       | Shah V (UK; rc)        | 1,183                             | aHR 1.70                   | 0.7                      | 4.13                     | 0.244        | Fair              |

\* values are adjusted odds ratio, unless otherwise denoted

aHR: adjusted hazards ratio; CI: confidence interval; COVID-19: novel coronavirus disease 2019; pc: prospective cohort; rc: retrospective cohort; UK: United Kingdom; USA: United States of America

Table 11. Immunocompromised

| Risk factor;<br>Outcome among<br>population                          | Study                  | Total<br>number<br>of<br>patients | Adjusted<br>odds<br>ratio* | 95% CI<br>lower<br>bound | 95% CI<br>upper<br>bound | p-value      | Quality<br>rating |
|----------------------------------------------------------------------|------------------------|-----------------------------------|----------------------------|--------------------------|--------------------------|--------------|-------------------|
| <b>Rheumatic disease</b>                                             |                        |                                   |                            |                          |                          |              |                   |
| <b>Hospitalization</b>                                               |                        |                                   |                            |                          |                          |              |                   |
| positive for COVID-19                                                | D'Silva K (USA;<br>pc) | 156                               | 1.1                        | 0.51                     | 2.38                     | 0.81         | Fair              |
| <b>ICU admission</b>                                                 |                        |                                   |                            |                          |                          |              |                   |
| ICU or mechanical<br>ventilation among<br>hospitalized with COVID-19 | D'Silva K (USA;<br>pc) | 65                                | <b>2.92</b>                | <b>1.002</b>             | <b>8.49</b>              | <b>0.049</b> | Fair              |
| <b>Mortality</b>                                                     |                        |                                   |                            |                          |                          |              |                   |
| positive for COVID-19                                                | D'Silva K (USA;<br>pc) | 156                               | 1.58                       | 0.31                     | 8.03                     | 0.58         | Fair              |
| <b>HIV</b>                                                           |                        |                                   |                            |                          |                          |              |                   |
| <b>Mortality</b>                                                     |                        |                                   |                            |                          |                          |              |                   |
| hospitalized with COVID-19                                           | Okoh A (USA; rc)       | 251                               | <b>0.07</b>                | <b>0.03</b>              | <b>0.52</b>              | <b>0.006</b> | Good              |

\* values are adjusted odds ratio, unless otherwise denoted

CI: confidence interval; COVID-19: novel coronavirus disease 2019; HIV: human immunodeficiency virus; ICU: intensive care unit; pc: prospective cohort; rc: retrospective cohort; USA: United States of America

Table 12. Mental health

| Risk factor;<br>Outcome among<br>population | Study                 | Total<br>number<br>of<br>patients | Adjusted<br>odds<br>ratio* | 95% CI<br>lower<br>bound | 95% CI<br>upper<br>bound | p-value | Quality<br>rating |
|---------------------------------------------|-----------------------|-----------------------------------|----------------------------|--------------------------|--------------------------|---------|-------------------|
| <b>Depression</b>                           |                       |                                   |                            |                          |                          |         |                   |
| <b>Hospitalization</b>                      |                       |                                   |                            |                          |                          |         |                   |
| positive for COVID-19                       | Azar K (USA; rc)      | 1,052                             | 1.18                       | 0.57                     | 2.41                     | >0.05   | Good              |
| <b>Ever seen a psychiatrist</b>             |                       |                                   |                            |                          |                          |         |                   |
| <b>Hospitalization</b>                      |                       |                                   |                            |                          |                          |         |                   |
| community sample                            | Lassale C (UK;<br>pc) | 340,966                           | 1.24                       | 0.99                     | 1.55                     | 0.057   | Fair              |

\* values are adjusted odds ratio, unless otherwise denoted

\*\* the reference category differs slightly across studies

CI: confidence interval; COVID-19: novel coronavirus disease 2019; pc: prospective cohort; rc: retrospective cohort;

UK: United Kingdom; USA: United States of America

Table 13. Place/state of residence

| Risk factor;<br>Outcome among<br>population    | Study                      | Total<br>number of<br>patients | Adjusted<br>odds<br>ratio* | 95% CI<br>lower<br>bound | 95% CI<br>upper<br>bound | p-value | Quality<br>rating |
|------------------------------------------------|----------------------------|--------------------------------|----------------------------|--------------------------|--------------------------|---------|-------------------|
| <b>Low-income geographic area</b>              |                            |                                |                            |                          |                          |         |                   |
| <b>Hospitalization</b>                         |                            |                                |                            |                          |                          |         |                   |
| positive for COVID-19                          | Price-Haywood EG (USA; rc) | 3,481                          | 1.22                       | 1.04                     | 1.43                     | NR      | Good              |
| <b>Homeless</b>                                |                            |                                |                            |                          |                          |         |                   |
| <b>Hospitalization</b>                         |                            |                                |                            |                          |                          |         |                   |
| positive for COVID-19                          | Azar K (USA; rc)           | 1,052                          | 3.25                       | 0.38                     | 28.02                    | >0.05   | Good              |
| <b>Number of people in household (1 vs. 2)</b> |                            |                                |                            |                          |                          |         |                   |
| <b>Hospitalization</b>                         |                            |                                |                            |                          |                          |         |                   |
| community sample                               | Lassale C (UK; pc)         | 340,966                        | 1.15                       | 0.93                     | 1.43                     | 0.195   | Fair              |
| <b>Number of people in household (3 vs. 2)</b> |                            |                                |                            |                          |                          |         |                   |
| <b>Hospitalization</b>                         |                            |                                |                            |                          |                          |         |                   |
| community sample                               | Lassale C (UK; pc)         | 340,966                        | 1.22                       | 0.97                     | 1.55                     | 0.093   | Fair              |
| <b>Number of people in household (4 vs. 2)</b> |                            |                                |                            |                          |                          |         |                   |
| <b>Hospitalization</b>                         |                            |                                |                            |                          |                          |         |                   |
| community sample                               | Lassale C (UK; pc)         | 340,966                        | 1.59                       | 1.26                     | 2.01                     | <0.001  | Fair              |
| <b>Suburban vs. urban hospital</b>             |                            |                                |                            |                          |                          |         |                   |
| <b>Mechanical ventilation</b>                  |                            |                                |                            |                          |                          |         |                   |
| hospitalized with COVID-19                     | Hur K (USA; rc)            | 486                            | 1.35                       | 0.82                     | 2.23                     | 0.241   | Good              |

\* values are adjusted odds ratio, unless otherwise denoted

CI: confidence interval; COVID-19: novel coronavirus disease 2019; pc: prospective cohort; rc: retrospective cohort;

UK: United Kingdom; USA: United States of America; vs.: versus



Table 14. Race/ethnicity

| Risk factor;<br>Outcome among<br>population    | Study                          | Total<br>number<br>of<br>patients | Adjusted<br>odds<br>ratio* | 95% CI<br>lower<br>bound | 95% CI<br>upper<br>bound | p-value          | Quality<br>rating |
|------------------------------------------------|--------------------------------|-----------------------------------|----------------------------|--------------------------|--------------------------|------------------|-------------------|
| <b>Black vs. non-Hispanic White</b>            |                                |                                   |                            |                          |                          |                  |                   |
| <b>Hospitalization</b>                         |                                |                                   |                            |                          |                          |                  |                   |
| community sample                               | Lassale C (UK; pc)             | 340,966                           | <b>2.66</b>                | <b>1.82</b>              | <b>3.91</b>              | <b>&lt;0.001</b> | Fair              |
| community sample                               | Patel AP (UK; pc)              | 418,794                           | <b>2.38</b>                | <b>1.52</b>              | <b>3.74</b>              | <b>&lt;0.001</b> | Fair              |
| positive for COVID-19                          | Azar K (USA; rc)               | 1,052                             | <b>2.67</b>                | <b>1.3</b>               | <b>5.47</b>              | <b>&lt;0.01</b>  | Good              |
| positive for COVID-19                          | Petrilli CM (USA; pc)          | 5,279                             | 0.81                       | 0.65                     | 1.01                     | 0.06             | Good              |
| positive for COVID-19                          | Price-Haywood EG (USA; rc)     | 3,481                             | <b>1.96</b>                | <b>1.62</b>              | <b>2.37</b>              | <b>NR</b>        | Good              |
| <b>Severe disease</b>                          |                                |                                   |                            |                          |                          |                  |                   |
| hospitalized with COVID-19                     | Gold JAW (USA; pc)             | 305                               | aHR 0.63                   | 0.35                     | 1.13                     | >0.05            | Good              |
| hospitalized with COVID-19                     | Petrilli CM (USA; pc)          | 2,725                             | <b>0.57</b>                | <b>0.41</b>              | <b>0.8</b>               | <b>0.001</b>     | Good              |
| <b>ICU admission</b>                           |                                |                                   |                            |                          |                          |                  |                   |
| hospitalized with COVID-19                     | Hajifathalian (USA; rc) #163   | 770                               | aRR 1.16                   | 0.7                      | 1.94                     | 0.558            | Fair              |
| hospitalized with COVID-19                     | Kalligeros M (USA; rc)         | 103                               | 0.8                        | 0.26                     | 2.45                     | 0.701            | Good              |
| <b>Mechanical Ventilation</b>                  |                                |                                   |                            |                          |                          |                  |                   |
| hospitalized with COVID-19                     | Kalligeros M (USA; rc)         | 103                               | 1.83                       | 0.55                     | 6.11                     | 0.327            | Good              |
| hospitalized with COVID-19                     | Hajifathalian (USA; rc) #163   | 770                               | aRR 1.23                   | 0.74                     | 2.06                     | 0.42             | Fair              |
| hospitalized with COVID-19                     | Hur K (USA; rc)                | 486                               | 0.56                       | 0.3                      | 1.01                     | 0.058            | Good              |
| <b>Mortality</b>                               |                                |                                   |                            |                          |                          |                  |                   |
| hospitalized with COVID-19                     | Hajifathalian (USA; rc) #163   | 770                               | aRR 1.49                   | 0.67                     | 3.29                     | 0.328            | Fair              |
| hospitalized with COVID-19                     | Perez-Guzman PN (UK; rc)       | 520                               | <b>1.86</b>                | <b>1.03</b>              | <b>3.35</b>              | <b>NR</b>        | Good              |
| hospitalized with COVID-19                     | Petrilli CM (USA; pc)          | 2,725                             | <b>0.71</b>                | <b>0.53</b>              | <b>0.94</b>              | <b>0.02</b>      | Good              |
| hospitalized with COVID-19                     | Price-Haywood EG (USA; rc)     | 1,382                             | aHR 0.89                   | 0.68                     | 1.17                     | NR               | Good              |
| hospitalized with COVID-19 (Black-African)**   | Public Health England (UK; rc) | 130,091                           | aHR 1.06                   | 0.96                     | 1.18                     | 0.24             | Fair              |
| hospitalized with COVID-19 (Black-Caribbean)** | Public Health England (UK; rc) | 130,091                           | <b>aHR 1.10</b>            | <b>1.02</b>              | <b>1.19</b>              | <b>0.01</b>      | Fair              |
| hospitalized with COVID-19 (Black-Other)**     | Public Health England (UK; rc) | 130,091                           | <b>aHR 1.35</b>            | <b>1.18</b>              | <b>1.55</b>              | <b>&lt;0.001</b> | Fair              |
| <b>Hispanic vs. Non-Hispanic White</b>         |                                |                                   |                            |                          |                          |                  |                   |
| <b>Hospitalization</b>                         |                                |                                   |                            |                          |                          |                  |                   |
| positive for COVID-19                          | Azar K (USA; rc)               | 1,052                             | 1.24                       | 0.78                     | 1.98                     | >0.05            | Good              |
| positive for COVID-19                          | Petrilli CM (USA; pc)          | 5,279                             | <b>1.63</b>                | <b>1.35</b>              | <b>1.97</b>              | <b>&lt;0.001</b> | Good              |
| <b>Severe disease</b>                          |                                |                                   |                            |                          |                          |                  |                   |
| hospitalized with COVID-19                     | Petrilli CM (USA; pc)          | 2,725                             | 0.89                       | 0.69                     | 1.2                      | 0.38             | Good              |
| <b>ICU admission</b>                           |                                |                                   |                            |                          |                          |                  |                   |
| hospitalized with COVID-19                     | Kalligeros M (USA; rc)         | 103                               | 0.56                       | 0.19                     | 1.58                     | 0.271            | Good              |
| <b>Mechanical ventilation</b>                  |                                |                                   |                            |                          |                          |                  |                   |
| hospitalized with COVID-19                     | Hur K (USA; rc)                | 486                               | 0.83                       | 0.44                     | 1.55                     | 0.565            | Good              |

| Risk factor;<br>Outcome among<br>population         | Study                             | Total<br>number<br>of<br>patients | Adjusted<br>odds<br>ratio* | 95% CI<br>lower<br>bound | 95% CI<br>upper<br>bound | p-value          | Quality<br>rating |
|-----------------------------------------------------|-----------------------------------|-----------------------------------|----------------------------|--------------------------|--------------------------|------------------|-------------------|
| hospitalized with COVID-19                          | Kalligeros M (USA; rc)            | 103                               | 1.17                       | 0.36                     | 3.82                     | 0.796            | Good              |
| <b>Asian vs. non-Hispanic White</b>                 |                                   |                                   |                            |                          |                          |                  |                   |
| <b>Hospitalization</b>                              |                                   |                                   |                            |                          |                          |                  |                   |
| community sample                                    | Lassale C (UK; pc)                | 340,966                           | 1.43                       | 0.91                     | 2.26                     | 0.125            | Fair              |
| community sample                                    | Patel AP (UK; pc)                 | 418,794                           | <b>1.75</b>                | <b>1.08</b>              | <b>2.85</b>              | <b>0.02</b>      | Fair              |
| positive for COVID-19                               | Petrilli CM (USA; pc)             | 5,279                             | 1.29                       | 0.97                     | 1.72                     | 0.08             | Good              |
| <b>Severe disease</b>                               |                                   |                                   |                            |                          |                          |                  |                   |
| hospitalized with COVID-19                          | Petrilli CM (USA; pc)             | 2,725                             | 1.24                       | 0.82                     | 1.9                      | 0.3              | Good              |
| <b>ICU admission</b>                                |                                   |                                   |                            |                          |                          |                  |                   |
| hospitalized with COVID-19                          | Hajifathalian (USA; rc) #163      | 770                               | <b>aRR 1.65</b>            | <b>1.05</b>              | <b>2.6</b>               | <b>0.031</b>     | Fair              |
| <b>Mechanical ventilation</b>                       |                                   |                                   |                            |                          |                          |                  |                   |
| hospitalized with COVID-19                          | Hajifathalian (USA; rc) #163      | 770                               | <b>aRR 1.68</b>            | <b>1.06</b>              | <b>2.66</b>              | <b>0.027</b>     | Fair              |
| <b>Mortality</b>                                    |                                   |                                   |                            |                          |                          |                  |                   |
| hospitalized with COVID-19                          | Hajifathalian (USA; rc) #163      | 770                               | aRR 1.47                   | 0.85                     | 2.55                     | 0.168            | Fair              |
| hospitalized with COVID-19                          | Perez-Guzman PN (UK; rc)          | 520                               | 1.74                       | 0.9                      | 3.36                     | NR               | Good              |
| hospitalized with COVID-19                          | Petrilli CM (USA; pc)             | 2,725                             | 1.26                       | 0.91                     | 1.75                     | 0.16             | Good              |
| hospitalized with COVID-19<br>(Asian-Bangladeshi)** | Public Health England (UK;<br>rc) | 130,091                           | <b>aHR 2.02</b>            | <b>1.74</b>              | <b>2.35</b>              | <b>&lt;0.001</b> | Fair              |
| hospitalized with COVID-19<br>(Asian-Chinese)**     | Public Health England (UK;<br>rc) | 130,091                           | <b>aHR 1.23</b>            | <b>1.04</b>              | <b>1.58</b>              | <b>0.02</b>      | Fair              |
| hospitalized with COVID-19<br>(Asian-Indian)**      | Public Health England (UK;<br>rc) | 130,091                           | <b>aHR 1.22</b>            | <b>1.13</b>              | <b>1.32</b>              | <b>&lt;0.001</b> | Fair              |
| hospitalized with COVID-19<br>(Asian-Other)**       | Public Health England (UK;<br>rc) | 130,091                           | <b>aHR 1.13</b>            | <b>1.02</b>              | <b>1.25</b>              | <b>0.02</b>      | Fair              |
| hospitalized with COVID-19<br>(Asian-Pakistani)**   | Public Health England (UK;<br>rc) | 130,091                           | <b>aHR 1.44</b>            | <b>1.31</b>              | <b>1.58</b>              | <b>&lt;0.001</b> | Fair              |

\* values are adjusted odds ratio, unless otherwise denoted

\*\*Findings were similar for ethnicity analyses stratified by age category, thus only results for the full sample are shown

aHR: adjusted hazards ratio; aRR: adjusted risk ratio; CI: confidence interval; COVID-19: novel coronavirus disease 2019; ICU: intensive care unit; NR: not reported; pc: prospective cohort; rc: retrospective cohort; UK: United Kingdom; USA: United States of America; vs.: versus

Table 15. Occupation

| Risk factor;<br>Outcome among<br>population                                           | Study                               | Total<br>number of<br>patients | Adjusted<br>odds<br>ratio* | 95% CI<br>lower<br>bound | 95% CI<br>upper<br>bound | p-value | Quality<br>rating |
|---------------------------------------------------------------------------------------|-------------------------------------|--------------------------------|----------------------------|--------------------------|--------------------------|---------|-------------------|
| <b>Healthcare workers: laryngologist/intubator vs. assistant</b>                      |                                     |                                |                            |                          |                          |         |                   |
| <b>Hospitalization</b>                                                                |                                     |                                |                            |                          |                          |         |                   |
| healthcare workers<br>performing tracheal<br>intubations on patients with<br>COVID-19 | El-Boghdady (Multi-<br>country; pc) | 1,718                          | aHR 0.76                   | 0.56                     | 1.04                     | 0.08    | Good              |

\* values are adjusted odds ratio, unless otherwise denoted

aHR: adjusted hazards ratio; CI: confidence interval; COVID-19: novel coronavirus disease 2019; pc: prospective cohort; vs.: versus

Table 16. Gender identity/sex

| Risk factor;<br>Outcome among<br>population                                  | Study                            | Total<br>number<br>of<br>patients | Adjusted<br>odds<br>ratio* | 95% CI<br>lower<br>bound | 95% CI<br>upper<br>bound | p-value          | Quality<br>rating |
|------------------------------------------------------------------------------|----------------------------------|-----------------------------------|----------------------------|--------------------------|--------------------------|------------------|-------------------|
| <b>Male vs. female</b>                                                       |                                  |                                   |                            |                          |                          |                  |                   |
| <b>Hospitalization</b>                                                       |                                  |                                   |                            |                          |                          |                  |                   |
| community sample                                                             | Patel AP (UK; pc)                | 418,794                           | <b>1.37</b>                | <b>1.12</b>              | <b>1.66</b>              | <b>0.00</b>      | Fair              |
| community sample                                                             | Lassale C (UK; pc)               | 340,966                           | 1.15                       | 0.92                     | 1.44                     | 0.219            | Fair              |
| positive for COVID-19                                                        | Azar K (USA; rc)                 | 1052                              | <b>1.94</b>                | <b>1.33</b>              | <b>2.81</b>              | <b>&lt;0.01</b>  | Good              |
| positive for COVID-19                                                        | Petrilli CM (USA; pc)            | 5,279                             | <b>2.67</b>                | <b>2.39</b>              | <b>3.2</b>               | <b>&lt;0.001</b> | Good              |
| positive for COVID-19                                                        | Price-Haywood EG (USA; rc)       | 3,481                             | <b>1.79</b>                | <b>1.54</b>              | <b>2.08</b>              | NR               | Good              |
| healthcare workers performing tracheal intubations on patients with COVID-19 | El-Boghdadly (Multi-country; pc) | 1,718                             | <b>aHR 0.74</b>            | <b>0.55</b>              | <b>0.99</b>              | <b>0.04</b>      | Good              |
| <b>Severe disease</b>                                                        |                                  |                                   |                            |                          |                          |                  |                   |
| hospitalized with COVID-19                                                   | Colaneri M (Italy; rc)           | 44                                | 17.24                      | 0.50                     | 1000.00                  | 0.1148           | Good              |
| hospitalized with COVID-19                                                   | Petrilli CM (USA; pc)            | 2,725                             | 1.06                       | 0.85                     | 1.3                      | 0.6              | Good              |
| death or transfer to the ICU (composite) among hospitalized for COVID-19     | Piano S (Italy; rc)              | 565                               | 1.42                       | 0.8                      | 2.52                     | 0.236            | Good              |
| <b>ICU admission</b>                                                         |                                  |                                   |                            |                          |                          |                  |                   |
| hospitalized with COVID-19                                                   | Busetto L (Italy; rc)            | 92                                | 0.54                       | 0.19                     | 1.52                     | 0.24             | Fair              |
| hospitalized with COVID-19                                                   | Kalligeros M (USA; rc)           | 103                               | 2.4                        | 0.87                     | 6.64                     | 0.09             | Good              |
| <b>Mechanical ventilation</b>                                                |                                  |                                   |                            |                          |                          |                  |                   |
| hospitalized with COVID-19                                                   | Busetto L (Italy; rc)            | 92                                | 1.22                       | 0.47                     | 3.17                     | 0.682            | Fair              |
| hospitalized with COVID-19                                                   | Hur K (USA; rc)                  | 486                               | <b>1.69</b>                | <b>1.04</b>              | <b>2.77</b>              | <b>0.034</b>     | Good              |
| hospitalized with COVID-19                                                   | Kalligeros M (USA; rc)           | 103                               | 1.13                       | 0.32                     | 3.4                      | 0.825            | Good              |
| hospitalized with COVID-19                                                   | Palaiodimos L (USA; rc)          | 200                               | <b>3.35</b>                | <b>1.51</b>              | <b>7.46</b>              | <b>0.003</b>     | Good              |
| <b>Mortality</b>                                                             |                                  |                                   |                            |                          |                          |                  |                   |
| hospitalized with COVID-19                                                   | Bianchetti A (Italy; rc)         | 627                               | 1.15                       | 0.79                     | 1.67                     | >0.05            | Fair              |
| hospitalized with COVID-19                                                   | Borobia A (Spain; rc)            | 2,226                             | <b>1.82</b>                | <b>1.27</b>              | <b>2.63</b>              | <b>0.002</b>     | Fair              |
| hospitalized with COVID-19                                                   | Busetto L (Italy; rc)            | 92                                | 2.51                       | 0.37                     | 16.94                    | 0.346            | Fair              |
| hospitalized with COVID-19                                                   | Cummings MJ (USA; pc)            | 257                               | aHR 1.13                   | 0.71                     | 1.81                     | NR               | Good              |
| hospitalized with COVID-19                                                   | Giacomelli A (Italy; pc)         | 233                               | aHR 1.42                   | 0.62                     | 3.28                     | 0.409            | Good              |
| hospitalized with COVID-19                                                   | Palaiodimos L (USA; rc)          | 200                               | <b>2.74</b>                | <b>1.25</b>              | <b>5.98</b>              | <b>0.011</b>     | Good              |
| hospitalized with COVID-19                                                   | Petrilli CM (USA; pc)            | 2,725                             | 0.92                       | 0.77                     | 1.11                     | 0.39             | Good              |
| hospitalized with COVID-19                                                   | Docherty AB (UK; pc)             | 20,133                            | <b>aHR 1.23</b>            | <b>1.16</b>              | <b>1.33</b>              | <b>&lt;0.001</b> | Good              |
| hospitalized with COVID-19                                                   | Price-Haywood EG (USA; rc)       | 1,382                             | aHR 1.14                   | 0.88                     | 1.47                     | NR               | Good              |
| hospitalized with COVID-19 (20-64 years)                                     | Public Health England (UK; rc)   | 64,961                            | aHR 1.99                   | 1.85                     | 2.14                     | <0.001           | Fair              |
| hospitalized with COVID-19 (>64 years)                                       | Public Health England (UK; rc)   | 63,094                            | aHR 1.47                   | 1.44                     | 1.51                     | <0.001           | Fair              |

\* values are adjusted odds ratio, unless otherwise denoted

1  
2  
3  
4  
5  
6  
7  
8  
9  
10  
11  
12  
13  
14  
15  
16  
17  
18  
19  
20  
21  
22  
23  
24  
25  
26  
27  
28  
29  
30  
31  
32  
33  
34  
35  
36  
37  
38  
39  
40  
41  
42  
43  
44  
45  
46  
47  
48  
49  
50  
51  
52  
53  
54  
55  
56  
57  
58  
59  
60

\*\* the reference category differs slightly across studies  
aHR: adjusted hazards ratio; CI: confidence interval; COVID-19: novel coronavirus disease 2019; ICU: intensive care unit; NR: not reported; pc: prospective cohort; rc: retrospective cohort; UK: United Kingdom; USA: United States of America; vs.: versus

For peer review only

**Table 17. Education/literacy level**

| Risk factor;<br>Outcome among<br>population  | Study              | Total<br>number of<br>patients | Adjusted<br>odds<br>ratio* | 95% CI<br>lower<br>bound | 95% CI<br>upper<br>bound | p-value | Quality<br>rating |
|----------------------------------------------|--------------------|--------------------------------|----------------------------|--------------------------|--------------------------|---------|-------------------|
| <b>Lower education vs. university degree</b> |                    |                                |                            |                          |                          |         |                   |
| <b>Hospitalization</b>                       |                    |                                |                            |                          |                          |         |                   |
| community sample                             | Lassale C (UK; pc) | 340,966                        | 1.15                       | 0.96                     | 1.37                     | 0.131   | Fair              |

\* values are adjusted odds ratio, unless otherwise denoted

CI: confidence interval; pc: prospective cohort; UK: United Kingdom

For peer review only

Table 18. Socioeconomic status

| Risk factor;<br>Outcome among<br>population                | Study                          | Total<br>number<br>of<br>patients | Adjusted<br>odds<br>ratio* | 95% CI<br>lower<br>bound | 95% CI<br>upper<br>bound | p-value          | Quality<br>rating |
|------------------------------------------------------------|--------------------------------|-----------------------------------|----------------------------|--------------------------|--------------------------|------------------|-------------------|
| <b>Material deprivation (Q2 vs. Q1 least deprived)</b>     |                                |                                   |                            |                          |                          |                  |                   |
| <b>Hospitalization (Townsend Index**)</b>                  |                                |                                   |                            |                          |                          |                  |                   |
| community sample                                           | Lassale C (UK; pc)             | 340,966                           | 1                          | 0.76                     | 1.33                     | 0.989            | Fair              |
| <b>Mortality (Index of Multiple Deprivation***)</b>        |                                |                                   |                            |                          |                          |                  |                   |
| Hospitalized                                               | Public Health England (UK; rc) | 130,091                           | <b>aHR 1.93</b>            | <b>1.70</b>              | <b>2.19</b>              | <b>&lt;0.001</b> | Fair              |
| <b>Town Material deprivation (Q3 vs. Q1)</b>               |                                |                                   |                            |                          |                          |                  |                   |
| <b>Hospitalization (Townsend Index)</b>                    |                                |                                   |                            |                          |                          |                  |                   |
| community sample                                           | Lassale C (UK; pc)             | 340,966                           | 0.99                       | 0.75                     | 1.31                     | 0.937            | Fair              |
| <b>Mortality (Index of Multiple Deprivation)</b>           |                                |                                   |                            |                          |                          |                  |                   |
| Hospitalized                                               | Public Health England (UK; rc) | 130,091                           | <b>aHR 1.65</b>            | <b>1.46</b>              | <b>1.88</b>              | <b>&lt;0.001</b> | Fair              |
| <b>Material deprivation (Q4 vs. Q1)</b>                    |                                |                                   |                            |                          |                          |                  |                   |
| <b>Hospitalization (Townsend Index)</b>                    |                                |                                   |                            |                          |                          |                  |                   |
| community sample                                           | Lassale C (UK; pc)             | 340,966                           | 1.24                       | 0.95                     | 1.62                     | 0.116            | Fair              |
| <b>Mortality (Index of Multiple Deprivation)</b>           |                                |                                   |                            |                          |                          |                  |                   |
| Hospitalized                                               | Public Health England (UK; rc) | 130,091                           | <b>aHR 1.38</b>            | <b>1.21</b>              | <b>1.57</b>              | <b>&lt;0.001</b> | Fair              |
| <b>Material deprivation (Q5 vs. Q1)</b>                    |                                |                                   |                            |                          |                          |                  |                   |
| <b>Hospitalization (Townsend Index)</b>                    |                                |                                   |                            |                          |                          |                  |                   |
| community sample                                           | Lassale C (UK; pc)             | 340,966                           | <b>1.67</b>                | <b>1.3</b>               | <b>2.16</b>              | <b>&lt;0.001</b> | Fair              |
| <b>Mortality (Index of Multiple Deprivation)</b>           |                                |                                   |                            |                          |                          |                  |                   |
| Hospitalized                                               | Public Health England (UK; rc) | 130,091                           | <b>aHR 1.32</b>            | <b>1.15</b>              | <b>1.52</b>              | <b>&lt;0.001</b> | Fair              |
| <b>Townsend index (continuous)</b>                         |                                |                                   |                            |                          |                          |                  |                   |
| <b>Hospitalization</b>                                     |                                |                                   |                            |                          |                          |                  |                   |
| community sample                                           | Patel AP (UK; pc)              | 418,794                           | <b>1.09</b>                | <b>1.05</b>              | <b>1.12</b>              | <b>&lt;0.001</b> | Fair              |
| <b>Average income (continuous)</b>                         |                                |                                   |                            |                          |                          |                  |                   |
| <b>Hospitalization</b>                                     |                                |                                   |                            |                          |                          |                  |                   |
| community sample                                           | Patel AP (UK; pc)              | 418,794                           | 1.01                       | 0.92                     | 1.11                     | 0.76             | Fair              |
| <b>Income percentile (26th to 50th vs. 25th and below)</b> |                                |                                   |                            |                          |                          |                  |                   |
| <b>Hospitalization</b>                                     |                                |                                   |                            |                          |                          |                  |                   |
| positive for COVID-19                                      | Azar K (USA; rc)               | 1,052                             | 1.2                        | 0.76                     | 1.9                      | >0.05            | Good              |
| <b>Income percentile (51st to 75th vs. 25th and below)</b> |                                |                                   |                            |                          |                          |                  |                   |
| <b>Hospitalization</b>                                     |                                |                                   |                            |                          |                          |                  |                   |
| positive for COVID-19                                      | Azar K (USA; rc)               | 1,052                             | <b>0.24</b>                | <b>0.12</b>              | <b>0.46</b>              | <b>&lt;0.001</b> | Good              |
| <b>Income percentile (&gt;=75th vs. 25th and below)</b>    |                                |                                   |                            |                          |                          |                  |                   |
| <b>Hospitalization</b>                                     |                                |                                   |                            |                          |                          |                  |                   |
| positive for COVID-19                                      | Azar K (USA; rc)               | 1,052                             | <b>0.55</b>                | <b>0.33</b>              | <b>0.91</b>              | <b>&lt;0.05</b>  | Good              |

\* values are adjusted odds ratio, unless otherwise denoted

1  
2  
3 \*\* Townsend index incorporates unemployment, car & home (non-)ownership & household crowding  
4 \*\*\* Index of Multiple Deprivation is used within the UK and incorporates income, employment, education, health,  
5 crime, barriers to housing and services, and living environment  
6 aHR: adjusted hazards ratio; CI: confidence interval; COVID-19: novel coronavirus disease 2019; pc: prospective  
7 cohort; Q1-5: quartile (first to fifth); rc: retrospective cohort; UK: United Kingdom; USA: United States of America; vs.:  
8 versus  
9  
10  
11  
12  
13  
14  
15  
16  
17  
18  
19  
20  
21  
22  
23  
24  
25  
26  
27  
28  
29  
30  
31  
32  
33  
34  
35  
36  
37  
38  
39  
40  
41  
42  
43  
44  
45  
46  
47  
48  
49  
50  
51  
52  
53  
54  
55  
56  
57  
58  
59  
60

For peer review only



Table 19. Age

| Risk factor;<br>Outcome among<br>population                               | Study                      | Total<br>number<br>of<br>patients | Adjusted<br>odds<br>ratio* | 95% CI<br>lower<br>bound | 95% CI<br>upper<br>bound | p-value           | Quality<br>rating |
|---------------------------------------------------------------------------|----------------------------|-----------------------------------|----------------------------|--------------------------|--------------------------|-------------------|-------------------|
| <b>Age (continuous or incremental)</b>                                    |                            |                                   |                            |                          |                          |                   |                   |
| <b>Hospitalization</b>                                                    |                            |                                   |                            |                          |                          |                   |                   |
| community sample                                                          | Lassale C (UK; pc)         | 340,966                           | <b>1.02</b>                | <b>1.01</b>              | <b>1.03</b>              | <b>0.003</b>      | Fair              |
| community sample                                                          | Patel AP (UK; pc)          | 418,794                           | <b>1.02</b>                | <b>1</b>                 | <b>1.03</b>              | <b>0.02</b>       | Fair              |
| positive for COVID-19                                                     | Price-Haywood EG (USA; rc) | 3,481                             | <b>1.29</b>                | <b>1.25</b>              | <b>1.33</b>              | <b>NR</b>         | Good              |
| <b>ICU admission</b>                                                      |                            |                                   |                            |                          |                          |                   |                   |
| hospitalized with COVID-19                                                | Busetto L (Italy; rc)      | 92                                | 0.97                       | 0.93                     | 1.01                     | 0.18              | Fair              |
| hospitalized with COVID-19                                                | Hajifathalian K (USA; rc)  | 770                               | aRR 1.01                   | 1.01                     | 1.02                     | 0.123             | Fair              |
| hospitalized with COVID-19                                                | Kalligeros M (USA; rc)     | 103                               | 1.03                       | 1                        | 1.07                     | 0.059             | Good              |
| <b>Mechanical ventilation</b>                                             |                            |                                   |                            |                          |                          |                   |                   |
| hospitalized with COVID-19                                                | Busetto L (Italy; rc)      | 92                                | 0.97                       | 0.93                     | 1                        | 0.091             | Fair              |
| hospitalized with COVID-19                                                | Hajifathalian K (USA; rc)  | 770                               | aRR 1.01                   | 0.99                     | 1.01                     | 0.43              | Fair              |
| hospitalized with COVID -19                                               | Kalligeros M (USA; rc)     | 103                               | 1.02                       | 0.98                     | 1.06                     | 0.271             | Good              |
| hospitalized with COVID-19 (quartiles of age)                             | Palaiodimos L (USA; rc)    | 200                               | <b>1.5</b>                 | <b>1.05</b>              | <b>2.12</b>              | <b>0.025</b>      | Good              |
| <b>Severe disease</b>                                                     |                            |                                   |                            |                          |                          |                   |                   |
| positive for COVID-19                                                     | Hajifathalian K (USA; rc)  | 1,059                             | <b>1.03</b>                | <b>NR</b>                | <b>NR</b>                | <b>&lt;0.001</b>  | Fair              |
| death or transfer to the ICU (composite) among hospitalized with COVID-19 | Piano S (Italy)            | 565                               | <b>1.03</b>                | <b>1.01</b>              | <b>1.05</b>              | <b>0.012</b>      | Good              |
| <b>Mortality</b>                                                          |                            |                                   |                            |                          |                          |                   |                   |
| hospitalized with COVID-19                                                | Busetto L (Italy; rc)      | 92                                | <b>1.21</b>                | <b>1.05</b>              | <b>1.39</b>              | <b>0.007</b>      | Fair              |
| hospitalized with COVID-19                                                | Perez-Guzman PN (UK; rc)   | 520                               | <b>2.16</b>                | <b>1.5</b>               | <b>3.12</b>              | <b>&lt;0.01</b>   | Good              |
| hospitalized with COVID-19                                                | Violi F (Italy; rc)        | 319                               | aHR <b>1.03</b>            | <b>1.01</b>              | <b>1.06</b>              | <b>0.001</b>      | Good              |
| hospitalized with COVID-19                                                | Hajifathalian K (USA; rc)  | 770                               | aRR <b>1.06</b>            | <b>1.04</b>              | <b>1.08</b>              | <b>&lt;0.001</b>  | Fair              |
| hospitalized with COVID-19                                                | Borobia A (Spain; rc)      | 2,226                             | <b>1.11</b>                | <b>1.09</b>              | <b>1.12</b>              | <b>&lt;0.001</b>  | Fair              |
| hospitalized with COVID-19                                                | Bianchetti A (Italy; rc)   | 627                               | <b>1.09</b>                | <b>1.07</b>              | <b>1.12</b>              | <b>&lt;0.001</b>  | Fair              |
| hospitalized with COVID-19                                                | Okoh A (USA; rc)           | 251                               | <b>1.04</b>                | <b>1.01</b>              | <b>1.06</b>              | <b>0.003</b>      | Good              |
| hospitalized with COVID-19                                                | Palaiodimos L (USA; rc)    | 200                               | <b>1.73</b>                | <b>1.13</b>              | <b>5.98</b>              | <b>0.011</b>      | Good              |
| hospitalized with COVID-19 (5-year increase)                              | Price-Haywood EG (USA; rc) | 1,382                             | aHR <b>1.18</b>            | <b>1.13</b>              | <b>1.24</b>              | <b>NR</b>         | Good              |
| hospitalized with COVID-19 (10-year increase)                             | Cummings MJ (USA; pc)      | 257                               | aHR <b>1.31</b>            | <b>1.09</b>              | <b>1.57</b>              | <b>NR</b>         | Good              |
| hospitalized with COVID-19 (10-year increase)                             | Giacomelli A (Italy; pc)   | 233                               | aHR <b>2.08</b>            | <b>1.48</b>              | <b>2.9</b>               | <b>&lt;0.0001</b> | Good              |
| <b>45-54 vs. ≤45 years old**</b>                                          |                            |                                   |                            |                          |                          |                   |                   |
| <b>Hospitalization</b>                                                    |                            |                                   |                            |                          |                          |                   |                   |
| positive for COVID-19                                                     | Azar K (USA; rc)           | 1,052                             | <b>2.24</b>                | <b>1.13</b>              | <b>4.43</b>              | <b>&lt;0.05</b>   | Good              |
| positive for COVID-19                                                     | Petrilli CM (USA; pc)      | 5,279                             | <b>2.14</b>                | <b>1.76</b>              | <b>2.59</b>              | <b>&lt;0.001</b>  | Good              |
| <b>Severe Disease</b>                                                     |                            |                                   |                            |                          |                          |                   |                   |

| Risk factor;<br>Outcome among<br>population | Study                          | Total<br>number<br>of<br>patients | Adjusted<br>odds<br>ratio* | 95% CI<br>lower<br>bound | 95% CI<br>upper<br>bound | p-value          | Quality<br>rating |
|---------------------------------------------|--------------------------------|-----------------------------------|----------------------------|--------------------------|--------------------------|------------------|-------------------|
| hospitalized with COVID-19                  | Petrilli CM (USA; pc)          | 2,725                             | 0.78                       | 0.54                     | 1.1                      | 0.21             | Good              |
| <b>Mortality</b>                            |                                |                                   |                            |                          |                          |                  |                   |
| hospitalized with COVID-19                  | Petrilli CM (USA; pc)          | 2,725                             | <b>1.95</b>                | <b>1.16</b>              | <b>3.31</b>              | <b>0.01</b>      | Good              |
| hospitalized with COVID-19                  | Public Health England (UK; rc) | 64,961                            | <b>aHR 3.33</b>            | <b>2.79</b>              | <b>3.99</b>              | <b>&lt;0.001</b> | Fair              |
| <b>50-64 vs. ≤45 years old**</b>            |                                |                                   |                            |                          |                          |                  |                   |
| <b>Hospitalization</b>                      |                                |                                   |                            |                          |                          |                  |                   |
| positive for COVID-19                       | Azar K (USA; rc)               | 1,052                             | <b>2.62</b>                | <b>1.37</b>              | <b>4.99</b>              | <b>&lt;0.01</b>  | Good              |
| positive for COVID-19                       | Petrilli CM (USA; pc)          | 5,279                             | <b>3.67</b>                | <b>3.01</b>              | <b>4.48</b>              | <b>&lt;0.001</b> | Good              |
| <b>Severe disease</b>                       |                                |                                   |                            |                          |                          |                  |                   |
| hospitalized with COVID-19                  | Petrilli CM (USA; pc)          | 2,725                             | 1.32                       | 0.93                     | 1.9                      | 0.12             | Good              |
| <b>Mortality</b>                            |                                |                                   |                            |                          |                          |                  |                   |
| hospitalized with COVID-19                  | Docherty AB (UK; pc)           | 20,133                            | <b>aHR 2.63</b>            | <b>2.06</b>              | <b>3.35</b>              | <b>&lt;0.001</b> | Good              |
| hospitalized with COVID-19                  | Petrilli CM (USA; pc)          | 2,725                             | <b>3.18</b>                | <b>1.93</b>              | <b>5.21</b>              | <b>&lt;0.001</b> | Good              |
| hospitalized with COVID-19                  | Public Health England (UK; rc) | 64,961                            | <b>aHR 8.94</b>            | <b>7.61</b>              | <b>10.5</b>              | <b>&lt;0.001</b> | Fair              |
| <b>&gt;60 vs. ≤45 years old</b>             |                                |                                   |                            |                          |                          |                  |                   |
| <b>Hospitalization</b>                      |                                |                                   |                            |                          |                          |                  |                   |
| positive for COVID-19                       | Azar K (USA; rc)               | 1,052                             | <b>4.62</b>                | <b>2.39</b>              | <b>9.95</b>              | <b>&lt;0.001</b> | Good              |
| positive for COVID-19                       | Petrilli CM (USA; pc)          | 5,279                             | <b>8.7</b>                 | <b>6.77</b>              | <b>11.22</b>             | <b>&lt;0.001</b> | Good              |
| <b>Severe disease</b>                       |                                |                                   |                            |                          |                          |                  |                   |
| hospitalized with COVID-19                  | Petrilli CM (USA; pc)          | 2,725                             | <b>1.73</b>                | <b>1.19</b>              | <b>2.5</b>               | <b>0.004</b>     | Good              |
| <b>Mechanical ventilation</b>               |                                |                                   |                            |                          |                          |                  |                   |
| hospitalized with COVID-19                  | Hur K (USA; rc)                | 486                               | <b>3.9</b>                 | <b>2.3</b>               | <b>6.76</b>              | <b>&lt;0.001</b> | Good              |
| <b>Mortality</b>                            |                                |                                   |                            |                          |                          |                  |                   |
| hospitalized with COVID-19                  | Imam (USA; rc)                 | 1,305                             | <b>1.93</b>                | <b>1.26</b>              | <b>2.94</b>              | <b>0.002</b>     | Fair              |
| hospitalized with COVID-19                  | Docherty AB (UK; pc)           | 20,133                            | <b>aHR 4.99</b>            | <b>3.99</b>              | <b>6.25</b>              | <b>&lt;0.001</b> | Good              |
| hospitalized with COVID-19                  | Petrilli CM (USA; pc)          | 2,725                             | <b>4.83</b>                | <b>2.93</b>              | <b>7.96</b>              | <b>&lt;0.001</b> | Good              |
| hospitalized with COVID-19                  | Public Health England (UK; rc) | 64,961                            | <b>aHR</b>                 | <b>19.01</b>             | <b>16.18</b>             | <b>22.35</b>     | <b>&lt;0.001</b>  |
| <b>&gt;70 vs. ≤45 years old</b>             |                                |                                   |                            |                          |                          |                  |                   |
| <b>Hospitalization</b>                      |                                |                                   |                            |                          |                          |                  |                   |
| positive for COVID-19                       | Azar K (USA; rc)               | 1,052                             | <b>5.68</b>                | <b>2.6</b>               | <b>12.38</b>             | <b>&lt;0.001</b> | Good              |
| positive for COVID-19                       | Petrilli CM (USA; pc)          | 5,279                             | <b>37.87</b>               | <b>26.1</b>              | <b>56.03</b>             | <b>&lt;0.001</b> | Good              |
| <b>Severe disease</b>                       |                                |                                   |                            |                          |                          |                  |                   |
| hospitalized with COVID-19                  | Petrilli CM (USA; pc)          | 2,725                             | <b>2.32</b>                | <b>1.57</b>              | <b>3.4</b>               | <b>&lt;0.001</b> | Good              |
| <b>Mortality</b>                            |                                |                                   |                            |                          |                          |                  |                   |
| hospitalized with COVID-19                  | Petrilli CM (USA; pc)          | 2,725                             | <b>7.69</b>                | <b>4.6</b>               | <b>12.84</b>             | <b>&lt;0.001</b> | Good              |
| hospitalized with COVID-19                  | Docherty AB (UK; pc)           | 20,133                            | <b>aHR 8.51</b>            | <b>6.85</b>              | <b>10.57</b>             | <b>&lt;0.001</b> | Good              |
| <b>&gt;80 vs. ≤45 years old</b>             |                                |                                   |                            |                          |                          |                  |                   |

| Risk factor;<br>Outcome among<br>population | Study                          | Total<br>number<br>of<br>patients | Adjusted<br>odds<br>ratio* | 95% CI<br>lower<br>bound | 95% CI<br>upper<br>bound | p-value          | Quality<br>rating |
|---------------------------------------------|--------------------------------|-----------------------------------|----------------------------|--------------------------|--------------------------|------------------|-------------------|
| <b>Hospitalization</b>                      |                                |                                   |                            |                          |                          |                  |                   |
| positive for COVID-19                       | Azar K (USA; rc)               | 1,052                             | <b>19.08</b>               | <b>7.86</b>              | <b>46.32</b>             | <b>&lt;0.001</b> | Good              |
| <b>Mortality</b>                            |                                |                                   |                            |                          |                          |                  |                   |
| hospitalized with COVID-19                  | Docherty AB (UK; pc)           | 20,133                            | <b>aHR 11.09</b>           | <b>8.93</b>              | <b>13.77</b>             | <b>&lt;0.001</b> | Good              |
| <b>70-79 vs. 65-69 years old</b>            |                                |                                   |                            |                          |                          |                  |                   |
| <b>Mortality</b>                            |                                |                                   |                            |                          |                          |                  |                   |
| hospitalized with COVID-19                  | Public Health England (UK; rc) | 63,094                            | <b>aHR 1.55</b>            | <b>1.47</b>              | <b>1.64</b>              | <b>&lt;0.001</b> | Fair              |
| <b>80-89 vs. 65-69 years old</b>            |                                |                                   |                            |                          |                          |                  |                   |
| <b>Mortality</b>                            |                                |                                   |                            |                          |                          |                  |                   |
| hospitalized with COVID-19                  | Public Health England (UK; rc) | 63,094                            | <b>aHR 2.15</b>            | <b>2.05</b>              | <b>2.26</b>              | <b>&lt;0.001</b> | Fair              |

\* values are adjusted odds ratio, unless otherwise denoted

\*\* the reference category differs slightly across studies

aHR: adjusted hazards ratio; CI: confidence interval; COVID-19: novel coronavirus disease 2019; ICU: intensive care unit; NR: not reported; pc: prospective cohort; rc: retrospective cohort; UK: United Kingdom; USA: United States of America; vs.: versus

Table 20. Other factors

| Risk factor;<br>Outcome among<br>population                    | Study                   | Total<br>number of<br>patients | Adjusted<br>odds<br>ratio* | 95% CI<br>lower<br>bound | 95% CI<br>upper<br>bound | p-value          | Quality<br>rating |
|----------------------------------------------------------------|-------------------------|--------------------------------|----------------------------|--------------------------|--------------------------|------------------|-------------------|
| <b>Smoking (current vs. never)</b>                             |                         |                                |                            |                          |                          |                  |                   |
| <b>Hospitalization</b>                                         |                         |                                |                            |                          |                          |                  |                   |
| positive for COVID-19                                          | Azar K (USA; rc)        | 1,052                          | 0.92                       | 0.31                     | 2.70                     | >0.05            | Good              |
| community sample                                               | Hamer (UK; pc)          | 387,109                        | <b>aRR 1.36</b>            | <b>1.08</b>              | <b>1.71</b>              | <b>NR</b>        | Fair              |
| community sample                                               | Lassale C (UK; pc)      | 340,966                        | 1.25                       | 0.96                     | 1.62                     | 0.095            | Fair              |
| community sample                                               | Patel AP (UK; pc)       | 418,794                        | 0.91                       | 0.66                     | 1.25                     | 0.55             | Fair              |
| positive for COVID-19                                          | Petrilli CM (USA; pc)   | 5,279                          | <b>0.59</b>                | <b>0.43</b>              | <b>0.81</b>              | <b>0.001</b>     | Good              |
| <b>Severe disease</b>                                          |                         |                                |                            |                          |                          |                  |                   |
| hospitalized with COVID-19                                     | Petrilli CM (USA; pc)   | 2,725                          | 0.82                       | 0.53                     | 1.3                      | 0.39             | Good              |
| <b>Mortality</b>                                               |                         |                                |                            |                          |                          |                  |                   |
| hospitalized with COVID-19                                     | Petrilli CM (USA; pc)   | 2,725                          | 0.92                       | 0.62                     | 1.38                     | 0.69             | Good              |
| <b>Smoking (former vs. never)</b>                              |                         |                                |                            |                          |                          |                  |                   |
| <b>Hospitalization</b>                                         |                         |                                |                            |                          |                          |                  |                   |
| community sample                                               | Hamer (UK; pc)          | 387,109                        | <b>aRR 1.36</b>            | <b>1.15</b>              | <b>1.59</b>              | <b>NR</b>        | Fair              |
| community sample                                               | Lassale C (UK; pc)      | 340,966                        | <b>1.3</b>                 | <b>1.1</b>               | <b>1.55</b>              | <b>0.003</b>     | Fair              |
| positive for COVID-19                                          | Petrilli CM (USA; pc)   | 5,279                          | <b>0.69</b>                | <b>0.56</b>              | <b>0.85</b>              | <b>&lt;0.001</b> | Good              |
| <b>Severe disease</b>                                          |                         |                                |                            |                          |                          |                  |                   |
| hospitalized with COVID-19                                     | Petrilli CM (USA; pc)   | 2,725                          | 1.05                       | 0.82                     | 1.3                      | 0.72             | Good              |
| <b>Mechanical ventilation</b>                                  |                         |                                |                            |                          |                          |                  |                   |
| hospitalized with COVID-19                                     | Petrilli CM (USA; pc)   | 2,725                          | 1.05                       | 0.82                     | 1.3                      | 0.72             | Good              |
| <b>Mortality</b>                                               |                         |                                |                            |                          |                          |                  |                   |
| hospitalized with COVID-19                                     | Petrilli CM (USA; pc)   | 2,725                          | 1.07                       | 0.88                     | 1.31                     | 0.49             | Good              |
| hospitalized with COVID-19                                     | Palaiodimos L (USA; rc) | 200                            | 0.83                       | 0.37                     | 1.87                     | 0.647            | Good              |
| <b>Smoking (former vs. current)</b>                            |                         |                                |                            |                          |                          |                  |                   |
| <b>Hospitalization</b>                                         |                         |                                |                            |                          |                          |                  |                   |
| positive for COVID-19                                          | Azar K (USA; rc)        | 1,052                          | 0.77                       | 0.25                     | 2.35                     | >0.05            | Good              |
| <b>Alcohol consumption (continuous)</b>                        |                         |                                |                            |                          |                          |                  |                   |
| <b>Hospitalization</b>                                         |                         |                                |                            |                          |                          |                  |                   |
| community sample                                               | Patel AP (UK; pc)       | 418,794                        | 1.04                       | 0.98                     | 1.11                     | 0.21             | Fair              |
| <b>Alcohol consumption (never/rarely vs. within guideline)</b> |                         |                                |                            |                          |                          |                  |                   |
| <b>Hospitalization</b>                                         |                         |                                |                            |                          |                          |                  |                   |
| community sample                                               | Hamer (UK; pc)          | 387,109                        | <b>aRR 1.57</b>            | <b>1.31</b>              | <b>1.88</b>              | <b>NR</b>        | Fair              |
| community sample                                               | Lassale C (UK; pc)      | 340,966                        | <b>1.3</b>                 | <b>1.07</b>              | <b>1.59</b>              | <b>0.01</b>      | Fair              |
| <b>Alcohol consumption (above vs. within guideline)</b>        |                         |                                |                            |                          |                          |                  |                   |
| <b>Hospitalization</b>                                         |                         |                                |                            |                          |                          |                  |                   |
| community sample                                               | Hamer (UK; pc)          | 387,109                        | <b>aRR 1.24</b>            | <b>1.03</b>              | <b>1.5</b>               | <b>NR</b>        | Fair              |
| community sample                                               | Lassale C (UK; pc)      | 340,966                        | 1.1                        | 0.9                      | 1.34                     | 0.368            | Fair              |
| <b>Rarely/never active vs. below guideline</b>                 |                         |                                |                            |                          |                          |                  |                   |

|                                                                                 |                    |         |                 |             |             |              |      |
|---------------------------------------------------------------------------------|--------------------|---------|-----------------|-------------|-------------|--------------|------|
| <b>Hospitalization</b>                                                          |                    |         |                 |             |             |              |      |
| community sample                                                                | Hamer (UK; pc)     | 387,109 | aRR 0.99        | 0.84        | 1.18        | NR           | Fair |
| <b>Rarely/never active vs. meeting guideline</b>                                |                    |         |                 |             |             |              |      |
| <b>Hospitalization</b>                                                          |                    |         |                 |             |             |              |      |
| community sample                                                                | Lassale C (UK; pc) | 340,966 | <b>1.22</b>     | <b>1</b>    | <b>1.48</b> | <b>0.049</b> | Fair |
| <b>Some activity (&gt;10 minutes but below guideline) vs. meeting guideline</b> |                    |         |                 |             |             |              |      |
| <b>Hospitalization</b>                                                          |                    |         |                 |             |             |              |      |
| community sample                                                                | Lassale C (UK; pc) | 340,966 | 0.93            | 0.77        | 1.13        | 0.466        | Fair |
| <b>Exceeding vs. meeting guideline</b>                                          |                    |         |                 |             |             |              |      |
| <b>Hospitalization</b>                                                          |                    |         |                 |             |             |              |      |
| community sample                                                                | Hamer (UK; pc)     | 387,109 | <b>aRR 1.24</b> | <b>1.03</b> | <b>1.5</b>  | <b>NR</b>    | Fair |

\* values are adjusted odds ratio, unless otherwise denoted

\*\* the reference category differs slightly across studies

aHR: adjusted hazards ratio; aRR: adjusted risk ratio; CI: confidence interval; COVID-19: novel coronavirus disease 2019; ICU: intensive care unit; NR: not reported; pc: prospective cohort; rc: retrospective cohort; UK: United Kingdom; USA: United States of America; vs.: versus

# BMJ Open

## Risk factors for severity of COVID-19: a rapid review to inform vaccine prioritization in Canada

|                                 |                                                                                                                                                                                                                                                                                                                                                                                                                                                                                                                                                                                                                                                                                                                                                                                                                                                                                                                                                                                                                                                                                                    |
|---------------------------------|----------------------------------------------------------------------------------------------------------------------------------------------------------------------------------------------------------------------------------------------------------------------------------------------------------------------------------------------------------------------------------------------------------------------------------------------------------------------------------------------------------------------------------------------------------------------------------------------------------------------------------------------------------------------------------------------------------------------------------------------------------------------------------------------------------------------------------------------------------------------------------------------------------------------------------------------------------------------------------------------------------------------------------------------------------------------------------------------------|
| Journal:                        | <i>BMJ Open</i>                                                                                                                                                                                                                                                                                                                                                                                                                                                                                                                                                                                                                                                                                                                                                                                                                                                                                                                                                                                                                                                                                    |
| Manuscript ID                   | bmjopen-2020-044684.R1                                                                                                                                                                                                                                                                                                                                                                                                                                                                                                                                                                                                                                                                                                                                                                                                                                                                                                                                                                                                                                                                             |
| Article Type:                   | Original research                                                                                                                                                                                                                                                                                                                                                                                                                                                                                                                                                                                                                                                                                                                                                                                                                                                                                                                                                                                                                                                                                  |
| Date Submitted by the Author:   | 16-Dec-2020                                                                                                                                                                                                                                                                                                                                                                                                                                                                                                                                                                                                                                                                                                                                                                                                                                                                                                                                                                                                                                                                                        |
| Complete List of Authors:       | Wingert, Aireen; University of Alberta Faculty of Medicine and Dentistry, Pediatrics, Alberta Research Centre for Health Evidence<br>Pillay, Jennifer; University of Alberta Faculty of Medicine and Dentistry, Pediatrics, Alberta Research Centre for Health Evidence<br>Gates, Michelle; University of Alberta Faculty of Medicine and Dentistry, Pediatrics, Alberta Research Centre for Health Evidence<br>Guitard, Samantha; University of Alberta Faculty of Medicine and Dentistry, Pediatrics, Alberta Research Centre for Health Evidence<br>Rahman, Sholeh; University of Alberta Faculty of Medicine and Dentistry, Pediatrics, Alberta Research Centre for Health Evidence<br>Beck, Andrew; University of Alberta Faculty of Medicine and Dentistry, Pediatrics, Alberta Research Centre for Health Evidence<br>Vandermeer, Ben; University of Alberta Faculty of Medicine and Dentistry, Pediatrics, Alberta Research Centre for Health Evidence<br>Hartling, Lisa; University of Alberta Faculty of Medicine and Dentistry, Pediatrics, Alberta Research Centre for Health Evidence |
| <b>Primary Subject Heading</b>: | Epidemiology                                                                                                                                                                                                                                                                                                                                                                                                                                                                                                                                                                                                                                                                                                                                                                                                                                                                                                                                                                                                                                                                                       |
| Secondary Subject Heading:      | Infectious diseases, Public health                                                                                                                                                                                                                                                                                                                                                                                                                                                                                                                                                                                                                                                                                                                                                                                                                                                                                                                                                                                                                                                                 |
| Keywords:                       | COVID-19, EPIDEMIOLOGY, Public health < INFECTIOUS DISEASES, INTENSIVE & CRITICAL CARE                                                                                                                                                                                                                                                                                                                                                                                                                                                                                                                                                                                                                                                                                                                                                                                                                                                                                                                                                                                                             |
|                                 |                                                                                                                                                                                                                                                                                                                                                                                                                                                                                                                                                                                                                                                                                                                                                                                                                                                                                                                                                                                                                                                                                                    |

SCHOLARONE™  
Manuscripts

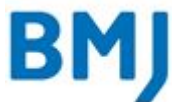

I, the Submitting Author has the right to grant and does grant on behalf of all authors of the Work (as defined in the below author licence), an exclusive licence and/or a non-exclusive licence for contributions from authors who are: i) UK Crown employees; ii) where BMJ has agreed a CC-BY licence shall apply, and/or iii) in accordance with the terms applicable for US Federal Government officers or employees acting as part of their official duties; on a worldwide, perpetual, irrevocable, royalty-free basis to BMJ Publishing Group Ltd ("BMJ") its licensees and where the relevant Journal is co-owned by BMJ to the co-owners of the Journal, to publish the Work in this journal and any other BMJ products and to exploit all rights, as set out in our [licence](#).

The Submitting Author accepts and understands that any supply made under these terms is made by BMJ to the Submitting Author unless you are acting as an employee on behalf of your employer or a postgraduate student of an affiliated institution which is paying any applicable article publishing charge ("APC") for Open Access articles. Where the Submitting Author wishes to make the Work available on an Open Access basis (and intends to pay the relevant APC), the terms of reuse of such Open Access shall be governed by a Creative Commons licence – details of these licences and which [Creative Commons](#) licence will apply to this Work are set out in our licence referred to above.

Other than as permitted in any relevant BMJ Author's Self Archiving Policies, I confirm this Work has not been accepted for publication elsewhere, is not being considered for publication elsewhere and does not duplicate material already published. I confirm all authors consent to publication of this Work and authorise the granting of this licence.

**Title:** Risk factors for severity of COVID-19: a rapid review to inform vaccine prioritization in Canada

**Authors:** Aireen Wingert, Jennifer Pillay, Michelle Gates, Samantha Guitard, Sholeh Rahman, Andrew Beck, Ben Vandermeer, Lisa Hartling

Aireen Wingert (corresponding), Alberta Research Centre for Health Evidence, Department of Pediatrics, University of Alberta, Edmonton Clinic Health Academy, 11405-87 Avenue NW, Edmonton, Alberta, Canada T6G 1C9 (Project Coordinator), [awingert@ualberta.ca](mailto:awingert@ualberta.ca)

Jennifer Pillay, Alberta Research Centre for Health Evidence, Department of Pediatrics, University of Alberta (Research Project Coordinator), [jpillay@ualberta.ca](mailto:jpillay@ualberta.ca)

Michelle Gates, Alberta Research Centre for Health Evidence, Department of Pediatrics, University of Alberta (Project Coordinator), [mgates1@ualberta.ca](mailto:mgates1@ualberta.ca)

Samantha Guitard, Alberta Research Centre for Health Evidence, Department of Pediatrics, University of Alberta (Research Assistant), [guitard@ualberta.ca](mailto:guitard@ualberta.ca)

Sholeh Rahman, Alberta Research Centre for Health Evidence, Department of Pediatrics, University of Alberta (Research Assistant), [sholeh1@ualberta.ca](mailto:sholeh1@ualberta.ca)

Andrew Beck, Alberta Research Centre for Health Evidence (Research Assistant), [abeck@ohri.on.ca](mailto:abeck@ohri.on.ca)

Ben Vandermeer, Alberta Research Centre for Health Evidence, Department of Pediatrics, University of Alberta (Biostatistician), [bv1@ualberta.ca](mailto:bv1@ualberta.ca)

Lisa Hartling, Director, Alberta Research Centre for Health Evidence, Department of Pediatrics, University of Alberta, [hartling@ualberta.ca](mailto:hartling@ualberta.ca)

**Contributor and guarantor information:**

AW, JP, AB, BV and LH contributed to the conception and design of the study. AW, JP, SG, SR, AB, and BV contributed to the screening of eligible studies. AW, SG, SR, and AB contributed to the acquisition of data. AW, JP, MG, BV and LH contributed to the synthesis and interpretation of data. AW, JP, MG, drafted the manuscript. AW, JP, MG, SG, SR, AB, BV, and LH revised the manuscript for important intellectual content. All authors approved the manuscript for submission.

**Copyright/licence for publication:** The Corresponding Author has the right to grant on behalf of all authors and does grant on behalf of all authors, a worldwide licence to the Publishers and its licencees in perpetuity, in all forms, formats and media (whether known now or created in the future), to i) publish, reproduce, distribute, display and store the Contribution, ii) translate the Contribution into other languages, create adaptations, reprints, include within collections and create summaries, extracts and/or, abstracts of the Contribution, iii) create any other derivative work(s) based on the Contribution, iv) to exploit all subsidiary rights in the Contribution, v) the inclusion of electronic links from the Contribution to third party material where—ever it may be located; and, vi) licence any third party to do any or all of the above.

**Patient and public involvement:** This research was conducted without patient and public involvement.



1  
2  
3 **Ethics approval:** This work was conducted using published data, and therefore, ethics approval was not  
4 required.  
5

6  
7 **Competing interests declaration:** All authors have completed the ICMJE uniform disclosure form at  
8 [www.icmje.org/coi\\_disclosure.pdf](http://www.icmje.org/coi_disclosure.pdf) and declare: grants from the National Advisory Committee for  
9 Immunization during the conduct of the study; no other relationships or activities that could appear to  
10 have influenced the submitted work. LH is supported by a Canada Research Chair in Knowledge  
11 Synthesis and Translation.  
12

13  
14 **Funding:** National Advisory Committee on Immunization (Canada); contract No. 4600001536.  
15

16  
17 **Data sharing statement:** No additional data available; all data used in this review are available within  
18 the manuscript and accompanying supplemental files.  
19

20 **Word count (main text): 4,235**  
21  
22  
23  
24  
25  
26  
27  
28  
29  
30  
31  
32  
33  
34  
35  
36  
37  
38  
39  
40  
41  
42  
43  
44  
45  
46  
47  
48  
49  
50  
51  
52  
53  
54  
55  
56  
57  
58  
59  
60

**ABSTRACT: 292 words**

**Objectives:** Rapid review to determine the magnitude of association between potential risk factors and severity of COVID-19, to inform vaccine prioritization in Canada.

**Setting:** Ovid MEDLINE(R) ALL, Epistemonikos COVID-19 in L·OVE Platform, McMaster COVID-19 Evidence Alerts, and websites were searched to 15 June 2020. Eligible studies were conducted in high-income countries and used multivariate analyses.

**Participants:** After piloting, screening, data extraction, and quality appraisal were performed by a single experienced reviewer. Of 3,740 unique records identified, 34 were included that reported on median 596 (range 44 to 418,794) participants, aged 42 to 84 years. 19/34 (56%) were good quality.

**Outcomes:** Hospitalization, intensive care unit admission, length of stay in hospital or intensive care unit, mechanical ventilation, severe disease, mortality.

**Results:** Authors synthesized findings narratively and appraised the certainty of the evidence for each risk factor-outcome association. There was low or moderate certainty evidence for a large ( $\geq 2$ -fold) magnitude of association between hospitalization in people with COVID-19, and: obesity class III, heart failure, diabetes, chronic kidney disease, dementia, age  $>45$  years, male gender, Black race/ethnicity (vs. non-Hispanic white), homelessness, and low income. Age  $>60$  and  $>70$  years may be associated with large increases in mechanical ventilation and severe disease, respectively. For mortality, a large magnitude of association may exist with liver disease, Bangladeshi ethnicity (vs. British white), age  $>45$  years, age  $>80$  years (vs. 65-69 years), and male gender among 20-64 years (but not older). Associations with hospitalization and mortality may be very large ( $\geq 5$ -fold) for those aged  $\geq 60$  years.

**Conclusions:** Increasing age (especially  $>60$  years) may be the most important risk factor for severe outcomes. High-quality primary research accounting for multiple confounders is needed to better understand the magnitude of associations for severity of COVID-19 with several other factors.

**PROSPERO registration:** CRD42020198001

**Strengths and limitations of this study**

- This rapid review captured a broad range of risk factors and outcomes associated with COVID-19 severity.
- Eligible studies reported independent associations through statistical adjustment and were applicable to high-income countries.
- The certainty of evidence was assessed for each risk factor-outcome-population association.
- The rapid approach involved pilot testing each review step with multiple reviewers until a high level of agreement was achieved; then a single experienced completed study selection, data extraction, and risk of bias assessments.
- The review includes studies published up to June 2020; guidance on vaccine prioritization should also consider emerging evidence.

## INTRODUCTION

Novel coronavirus disease 2019 (COVID-19) is an infectious respiratory disease caused by the newly identified Severe Acute Respiratory Syndrome-Coronavirus-2 (SARS-CoV-2),<sup>[1]</sup> which reached worldwide pandemic status in early March 2020.<sup>[2]</sup> As of December 7, there were over 65.8 million confirmed cases worldwide and 1.5 million deaths attributed to the virus.<sup>[3]</sup> Most people who develop COVID-19 will experience mild-to-moderate illness primarily affecting the respiratory system and recover at home.<sup>[4]</sup> In more severe cases, patients may require specialized care (e.g., admission to hospital and/or intensive care unit [ICU], assisted ventilation)<sup>[5]</sup> as the disease can progress to respiratory failure and/or affect multiple organ systems.<sup>[4]</sup>

Given the rapid spread of COVID-19 since its first emergence in late 2019, and potential for severe illness (including death), the development of a preventive vaccine has become a global priority.<sup>[6]</sup> Vaccine development has been progressing at an unprecedented pace;<sup>[7-10]</sup> however, the initial vaccine supply is not expected to be sufficient to cover the entire population right away. Therefore, it is of high priority to policymakers to plan for the efficient, effective, and equitable allocation of vaccines when limited supply will necessitate recommendations for the vaccination of certain groups earlier than others. Due to the novel nature of COVID-19, these groups for early vaccination have not yet been established.<sup>[11]</sup>

The National Advisory Committee on Immunization (NACI) is an expert advisory body that provides advice on the use of vaccines in Canada.<sup>[12]</sup> At the time of writing, NACI is developing guidance on priority pandemic immunization strategies for COVID-19 vaccination when initial vaccine supply is limited.<sup>[11]</sup> To inform this guidance, NACI is using its recently published Ethics, Equity, Feasibility and Acceptability (EEFA) Framework<sup>[13]</sup> to ensure these factors are systematically and comprehensively considered. One of the evidence informed tools that make up this framework is the “Equity Matrix” which has adapted the PROGRESS-Plus model of health determinants and outcomes<sup>[14]</sup> to ensure important vaccine-specific equity factors are explicitly included. The resulting “P<sup>2</sup>ROGRESS And Other Factors” framework includes a range of biological and social factors that likely contribute to inequities in health outcomes across population groups (e.g., pre-existing disease/condition, place/state of residence, race/ethnicity/culture/language, occupation, gender identity/sex), but it is not yet clear how each factor might apply to COVID-19 outcomes. A discussion on the use of this Equity Matrix, with evidence from this rapid review, as a critical tool to guide the ethically just allocation of scarce resources is published elsewhere.<sup>[15]</sup>

With the aim of providing timely, evidence-informed guidance on pandemic vaccine prioritization, NACI required a rigorous and expedited synthesis of the available evidence on population groups that are at increased risk of severe illness and mortality as a result of COVID-19. Responding to this need, we conducted a rapid review to determine the magnitude of association between “P<sup>2</sup>ROGRESS And Other Factors” and risk of severe outcomes of COVID-19.

## METHODS

### Review Approach

1  
2  
3 Rapid reviews are a form of knowledge synthesis that accelerate the process of conducting a traditional  
4 systematic review through streamlining or omitting some steps to produce evidence in a resource-  
5 efficient manner.[16] Methods for streamlining one or more stages of the review process are highly  
6 dependent on context such as the organizational capacity of the review producer (e.g., trained and  
7 experienced personnel), and needs of policy-makers for decision-making;[17, 18] one or more of the  
8 systematic review dimensions (i.e., scope, comprehensiveness, rigor/quality control, approach to  
9 synthesis, conclusions) may be modified for a rapid review.[17]  
10  
11  
12

13 The need for empiric evidence to inform the prioritization of pandemic immunization strategies in  
14 Canada necessitated a rapid but rigorous approach to synthesizing the currently available data.  
15 Therefore, we performed a rapid review informed by traditional systematic review methodology,[19]  
16 with several modifications to allow for the evidence to be synthesized on an expedited timeline. We  
17 sought stakeholder input on the review question, eligibility criteria, and outcomes, to inform the  
18 protocol for applicability and feasibility. We used a single experienced reviewer to select studies, extract  
19 data, and assess risk of bias, whereas in traditional systematic reviews these steps typically involve two  
20 reviewers to some degree. To ensure methodological rigour, we conducted pilot testing with more than  
21 one reviewer at each step; once a high level of agreement was achieved, a single reviewer proceeded  
22 with completing the step. In addition, we focused the scope of the review to include only higher quality  
23 studies (i.e., using adjusted analysis), and those having high applicability to Canada (e.g., high-income  
24 countries with universal-like health care systems).  
25  
26  
27  
28  
29

30 NACI's High Consequence Infectious Disease Vaccine Working Group was consulted to develop and  
31 refine the scope of the review (i.e., priority population(s), risk condition(s)/factor(s), and outcomes of  
32 interest), but was not involved in the conduct of the review. The working group was not involved in  
33 selection of studies nor the synthesis of findings.  
34  
35

36 The review was conducted following an *a-priori* protocol (PROSPERO #CRD42020198001). Because there  
37 is not yet formal guidance on the reporting of rapid reviews, reporting adheres to the Preferred  
38 Reporting Items for Systematic Reviews and Meta-Analyses (PRISMA).[20]  
39  
40  
41

## 42 Literature Search

43 A health sciences librarian searched Ovid MEDLINE(R) ALL on 15 June 2020 using concepts related to  
44 COVID-19, P<sup>2</sup>ROGRESS And Other Factors, and severe outcomes (Supplement File, Supplement 1). The  
45 search was limited to studies published in English or French in 2020. Additionally, the search was limited  
46 to populations in countries that are members of the Organisation for Economic Cooperation and  
47 Development (OECD),[21] in an effort to include studies of highest relevance to the Canadian context.  
48 Editorials and letters were excluded. We supplemented the Medline search by hand-searching  
49 Epistemonikos COVID-19 in L-OVE Platform (<https://app.iloveevidence.com/topics>) and McMaster  
50 COVID-19 Evidence Alerts (<https://plus.mcmaster.ca/COVID-19/>) for relevant prognosis or aetiology  
51 studies up to 12 June 2020. A hand-search of relevant websites recommended by the NACI working  
52 group was also undertaken, as well as continual surveillance for publication of relevant pre-prints  
53  
54  
55  
56  
57  
58  
59  
60

1  
2  
3 located by the search. Searches were exported to an Endnote Library (X9, Clarivate Analytics,  
4 Philadelphia, PA) and duplicates removed.  
5  
6

### 7 **Eligibility Criteria**

8 We included studies published in English or French since 1 January 2020 that reported on the magnitude  
9 of association between potential P<sup>2</sup>ROGRESS And Other Factors and several outcomes of COVID-19  
10 (Supplement File, Supplement 2). Eligible source populations, in order of priority, were people (a) from a  
11 general/community sample, (b) with COVID-19 confirmed (by laboratory testing or epidemiologic  
12 linkage), and (c) hospitalized with COVID-19. Although considered potentially of interest, studies only  
13 including people with a risk factor of interest were not included. We excluded studies where the entire  
14 study population had severe disease (e.g., ICU settings). To ensure relevance to the Canadian context,  
15 studies had to be conducted in OECD countries;[21] we included OECD studies from countries that do  
16 not provide universal (or near universal) coverage for core medical services (i.e., Chile, Greece, Mexico,  
17 Poland, the Slovak Republic, and the United States)[22] but considered these to be less applicable to the  
18 Canadian context when interpreting the findings. The infection must have been confirmed by laboratory  
19 testing or linked epidemiologically (e.g., household contact). Studies including populations with other  
20 pandemic-related infections (e.g., Severe Acute Respiratory Syndrome, Middle East Respiratory  
21 Syndrome) were excluded if data specific to COVID-19 cases could not be isolated.  
22  
23  
24  
25  
26

27 The exposures of interest were any P<sup>2</sup>ROGRESS And Other Factors believed to be associated with  
28 differential outcomes across population groups (i.e., pre-existing conditions, place or state of residence,  
29 race/ethnicity/culture/language, immigration, refugee status, occupation, gender identity or sex,  
30 religion or belief system, education or literacy level, socioeconomic status, social capital, age, and other  
31 factors).[23, 24] We did not include as risk factors any signs or symptoms on presentation with COVID.  
32 Eligible comparators were those within the same source population (e.g., all hospitalized, as described  
33 above) that did not have the P<sup>2</sup>ROGRESS And Other Factor, or experienced a P<sup>2</sup>ROGRESS And Other  
34 Factor to a different degree (e.g., older vs. younger). We excluded studies of interventions.  
35  
36  
37  
38

39 Any length of follow-up for outcomes of interest was acceptable. Eligible studies reported on at least  
40 one primary outcome (i.e., rate of hospitalization, hospital length of stay, severe disease [as defined by  
41 study authors; for example, composite outcome of ICU transfer or death], ICU admission and length of  
42 stay, need for mechanical ventilation [MV], and mortality [case fatality or all-cause]). We refer to this  
43 range of outcomes as “severe COVID-19” or “severity of COVID-19” throughout the review, though  
44 distinct from the composite outcome of “severe disease”. Each of these outcomes are applicable to at  
45 least one of the abovementioned eligible populations. In order to prioritize the most rigorous and  
46 applicable evidence, we included only prospective and retrospective cohort studies that employed a  
47 multivariate analysis and provided results of the independent contribution of P<sup>2</sup>ROGRESS And Other  
48 Factors to severe outcomes, while accounting for potential confounders (minimally age and sex). Pre-  
49 prints were included only if they were accepted by a peer-reviewed journal; pre-prints that were later  
50 published (between the date of the search and manuscript submission) were included. Government  
51 reports from hand-searched websites were eligible.  
52  
53  
54  
55  
56  
57  
58  
59  
60

### Study Selection

All records retrieved by the searches were exported to a Microsoft Office Excel (Microsoft Corporation, Redmond, WA) spreadsheet for screening. After piloting the eligibility criteria on a sample of 70 records, one reviewer independently screened records for inclusion by title/abstract, and those deemed to be potentially relevant were assessed by full text. Uncertainties about the inclusion of any full text study were resolved through consultation with a second reviewer.

### Data Extraction

Following a pilot round, one reviewer independently extracted data from each included study into an Excel workbook. We extracted data on (a) population size and demographics, (b) setting, (c) dates of data collection, (d) COVID-19 ascertainment method, (e) co-infections, (f) outcomes reported with definitions for composite outcomes (e.g., severe disease), (g) number of participants analysed, (h) relevant outcome data related to P<sup>2</sup>ROGRESS factors of interest (using the most adjusted model, if more than one was reported). For both continuous and dichotomous outcomes, we extracted adjusted relative effect sizes (i.e., odds ratio [OR], risk ratio [RR], hazard ratio [HR]) and measures of variability (95% confidence interval [CI]). A second reviewer was consulted in the event of uncertainty about any of the extracted data. Given the expedited approach, we extracted only data that were reported within the included studies and made no attempt to contact authors for missing or unclear data.

### Quality Assessments

To expedite quality assessments, we did not use a formal tool; instead we focused on key variables that were considered to be most relevant to the topic, and that would allow for meaningful stratification of studies by quality. The key variables that we used to assess the quality of the included studies were (a) the extent of adjustment for relevant covariates (i.e., basic adjustment for age and sex, versus more extensive adjustment for numerous potential confounders including comorbidities), (b) follow-up duration and extent of censorship for some outcomes (e.g.,  $\geq 2$  weeks for mortality), and (c) inappropriate or large exclusions from the study and/or analysis (e.g., missing data on risk factor status or analytical variables). Following assessment of these key variables by a single reviewer, studies without concerns for all three criteria were rated good while others were rated fair. A second reviewer was consulted in the case of uncertainty about the assessment of any individual study.

### Synthesis

Given substantial clinical (e.g., risk factors and/or comparators examined, outcome definitions) and methodological (varying covariates included in the adjusted analyses, different measures of association) heterogeneity, it was not thought appropriate to pool the studies statistically. Instead, we present a narrative summary of the results across studies for each risk factor. When making conclusions about the association between a P<sup>2</sup>ROGRESS And Other Factor and an outcome, we focused primarily on the magnitude of effect rather than statistical significance, which is heavily dependent on sample size. We categorized associations to be small/unimportant (odds ratio [OR] or risk ratio [RR]  $\leq 1.70$ ), moderate (1.71 to 1.99), large ( $\geq 2.00$ ), or very large ( $\geq 5.00$ ).<sup>[25]</sup> When determining the magnitude, we compared findings across all relevant studies and often relied heavily on the findings of the largest and/or good quality studies.

### **Certainty of Evidence**

The expedited approach to evidence synthesis did not allow for a formal appraisal of the certainty of evidence across studies for each P<sup>2</sup>ROGRESS And Other Factor-Outcome association. Instead, a single reviewer assessed the certainty of the evidence for each association considering relevant components of the Grading of Recommendations Assessment, Development and Evaluation (GRADE) approach:[26, 27] (a) directness in terms of country (presence of universal healthcare) and source population (community sample vs. hospitalized patients), (b) sample size (n<500 considered small) and magnitude of association, (c) study quality, and (d) consistency of associations (in direction and magnitude) across studies. Bodies of evidence started at high certainty[28] and were rated down for weaknesses in any of the aforementioned characteristics. The level of certainty in associations are referred to using the terms 'uncertain' (no or very low certainty), 'may' (low or some certainty), and 'probably' (moderate certainty).[29] At least two other reviewers confirmed the certainty of evidence appraisals, with disagreements resolved by discussion.

## **RESULTS**

### **Characteristics of Studies**

Of 3,740 unique records identified by the searches, 949 were screened at full text, and 34 studies that reported on 32 unique populations were included in the review (Figure 1; Supplemental File [Supplement 3] shows studies excluded by full text, with reasons).[30-63] Three studies conducted in the United Kingdom (UK)[46, 51, 54] used overlapping cohorts from a single medical/research database, and were considered as a single population in the analysis. Another large UK study[63] is likely to also be overlapping with these populations, but the degree of overlap is not known.

Table 1 shows the characteristics of the included studies (full details about individual studies in Supplemental File [Supplement 4]). The studies were published between 23 April and 6 July 2020, and half (17/34, 50%) reported on populations in the United States.[30, 31, 38, 39, 43-45, 47-50, 52, 53, 56, 58, 60, 61] The remaining countries represented (Italy,[32, 34-37, 42, 57, 62] Spain,[33] UK[40, 46, 51, 54, 55, 59, 63]) all have universal or universal-like healthcare (one study used data from 17 countries). All studies reported on adults, and the overall median was 596 participants (range 44 to 418,794). The mean or median age of the populations studied ranged from 42 to 84 years (in 32/34 [94%] mean age was 54 to 71 years). Most studies (16/34, 47%) examined the association between risk factors and outcomes in a hospitalized population. Studies reported variable definitions of "severe disease"; we considered them sufficiently similar to be grouped under this outcome. Studies most commonly reported on the independent association of pre-existing conditions (n=27 studies), gender identity or sex (n=18), and race or ethnicity (n=12) with severe outcomes (most commonly hospitalization, n=9). P<sup>2</sup>ROGRESS And Other Factors not examined in the included studies were immigration or refugee status, religion or belief system, social capital, and substance abuse disorders. There were also no data specific to pregnant women, indigenous populations, people with disabilities, nor different ages in children.

**Table 1.** Included studies overview (n=34)

| Study design & country<br>(no. of studies)                                                                                                                                                                                                                                                                                              | P <sup>2</sup> ROGRESS risk factors<br>(no. of studies*)                                                                                                                                                                                                                                                                                                                                                                                                                                                                                                                                                                                                                                                                                                                                                                                                                                                                                                                                                                                                                                                                                                                                                                                                                                                                                                                                                                                                                                                                                                                          | COVID-19<br>(no. of studies)                                                                                                                                                                                               | Primary outcomes<br>(no. of studies*)                                                                                                                                                                                                                                                                                | Risk of bias<br>(no. of studies) |
|-----------------------------------------------------------------------------------------------------------------------------------------------------------------------------------------------------------------------------------------------------------------------------------------------------------------------------------------|-----------------------------------------------------------------------------------------------------------------------------------------------------------------------------------------------------------------------------------------------------------------------------------------------------------------------------------------------------------------------------------------------------------------------------------------------------------------------------------------------------------------------------------------------------------------------------------------------------------------------------------------------------------------------------------------------------------------------------------------------------------------------------------------------------------------------------------------------------------------------------------------------------------------------------------------------------------------------------------------------------------------------------------------------------------------------------------------------------------------------------------------------------------------------------------------------------------------------------------------------------------------------------------------------------------------------------------------------------------------------------------------------------------------------------------------------------------------------------------------------------------------------------------------------------------------------------------|----------------------------------------------------------------------------------------------------------------------------------------------------------------------------------------------------------------------------|----------------------------------------------------------------------------------------------------------------------------------------------------------------------------------------------------------------------------------------------------------------------------------------------------------------------|----------------------------------|
| Study design:<br><ul style="list-style-type: none"> <li>• Retrospective cohort (25)</li> <li>• Prospective cohort (9)</li> </ul> Country:<br><ul style="list-style-type: none"> <li>• USA (17)</li> <li>• Italy (8)</li> <li>• UK (7 studies in 5 populations)</li> <li>• Spain (1)</li> <li>• Multi-country<sup>§</sup> (1)</li> </ul> | <ul style="list-style-type: none"> <li>❖ Pre-existing disease/disability:               <ul style="list-style-type: none"> <li>○ Underweight, overweight or obesity (12 studies of 10 populations)</li> <li>○ Cardiovascular (chronic cardiac disease/heart disease, congestive heart failure, coronary artery disease, hyperlipidemia, hypertension) (10 studies of 9 populations)</li> <li>○ Endocrinologic (diabetes, hyperglycemia) (8)</li> <li>○ Respiratory (asthma, COPD, chronic bronchitis, lung disease, previous pneumonia) (8 studies of 7 populations)</li> <li>○ Renal (chronic kidney disease) (5)</li> <li>○ Malignancy (cancer) (5)</li> <li>○ Neurological (Alzheimer's, dementia, chronic neurological disorder) (4)</li> <li>○ Hepatic (liver disease, with or without cirrhosis) (3)</li> <li>○ Immunocompromised (rheumatic disease, HIV/AIDS) (2)</li> <li>○ Mental health (2)</li> <li>○ Gastrointestinal (irritable bowel disease) (1)</li> </ul> </li> <li>❖ Place of residence (4)</li> <li>❖ Race or ethnicity (11 studies of 10 populations)</li> <li>❖ Occupation (1)</li> <li>❖ Gender identity or sex (18 studies of 17 populations)</li> <li>❖ Education (1)</li> <li>❖ Socioeconomic status (5 studies of 4 populations)</li> <li>❖ Age (17 studies of 16 populations)</li> <li>❖ Other factors:               <ul style="list-style-type: none"> <li>○ Smoking status (7 studies of 5 populations)</li> <li>○ Alcohol consumption (3 studies of 1 population)</li> <li>○ Physical activity (2 studies of 1 population)</li> </ul> </li> </ul> | Diagnosis:<br><ul style="list-style-type: none"> <li>• RT-PCR/PCR (25)</li> <li>• Lab-confirmed (5)</li> <li>• ICD codes (1)</li> <li>• Lab-confirmed or ICD codes (2)</li> <li>• Lab-confirmed or symptoms (1)</li> </ul> | <ul style="list-style-type: none"> <li>• Rate of hospitalization (9)</li> <li>• Hospitalization/self-isolation (composite) (1)</li> <li>• Hospital length of stay (0)</li> <li>• ICU admission (3)</li> <li>• ICU length of stay (0)</li> <li>• Severe disease<sup>†</sup> (14)</li> <li>• Mortality (19)</li> </ul> | Good (19)<br>Fair (15)           |

\* a study may contribute to more than one risk group, or outcome

<sup>§</sup> study of healthcare workers includes data from Australia, Canada, Chile, China, Germany, India, Ireland, Italy, Netherlands, New Zealand, Pakistan, Poland, Singapore, South Africa, Sweden, UK, and USA

<sup>†</sup> severe disease, defined by studies as (number of studies): requiring high-flow oxygen (1); ICU or MV (1); non-invasive ventilation or MV (1); MV (4); ICU or mortality (composite)(4); hospitalization and/or 30-day mortality (composite)(1); MV or mortality (composite)(1); ICU, MV, discharge to hospice, or death (composite)(1)



1  
2  
3  
4  
5  
6  
7  
8  
9  
10  
11  
12  
13  
14  
15  
16  
17  
18  
19  
20  
21  
22  
23  
24  
25  
26  
27  
28  
29  
30  
31  
32  
33  
34  
35  
36  
37  
38  
39  
40  
41  
42  
43  
44  
45  
46  
47

BMI: body mass index; COVID-19: novel coronavirus; HIV/AIDS: human immunodeficiency virus/acquired immunodeficiency syndrome; ICD: International Classification of Diseases; ICU: intensive care unit; MV: mechanical ventilation; No: number; NR: not reported; RT-PCR; reverse transcription polymerase chain reaction; UK: United Kingdom; USA: United States of America

For peer review only

### Study Quality

The majority of studies (19/34, 56%) were rated as good quality[30, 31, 36, 38, 40-43, 47, 49, 52, 53, 55-60, 62] because they adjusted for age, sex, and pre-existing disease in their analysis, had adequate follow-up of outcomes, and few or no missing data. The remaining studies had flaws in one or more of the three domains that we considered to be most important for this review.

### Association Between Risk Factors and Outcomes

Table 2 shows a summary of findings for associations between each reported risk factor and outcomes of interest; detailed data are in the Supplemental File (Supplement 5).

For peer review only

**Table 2.** Summary of evidence for associations between risk factors and severe outcomes of COVID-19

| Risk factor<br>(at-risk vs. reference population) <sup>a</sup>            | Population <sup>b</sup>                   | Magnitude of association (confidence in association) <sup>c</sup> , by outcome |               |                        |                 |                 |
|---------------------------------------------------------------------------|-------------------------------------------|--------------------------------------------------------------------------------|---------------|------------------------|-----------------|-----------------|
|                                                                           |                                           | Hospitalization                                                                | ICU admission | Mechanical ventilation | Severe disease  | Mortality       |
| <b>Pre-existing conditions</b>                                            |                                           |                                                                                |               |                        |                 |                 |
| <b>Body mass index(kg/m<sup>2</sup>)<sup>d</sup></b>                      |                                           |                                                                                |               |                        |                 |                 |
| Underweight (<18.5) vs. normal (18.5-24.9)                                | Hospitalized                              |                                                                                | -<br>(low)    | -<br>(low)             |                 | -<br>(low)      |
| Overweight (25.0-29.9) vs. normal                                         | Community sample or positive for COVID-19 | -<br>(low)                                                                     | uncertain     | uncertain              | -<br>(low)      | -<br>(low)      |
| Obesity class I and II (≥30.0) vs. normal                                 | Community sample or positive for COVID-19 | +<br>(low)                                                                     | +<br>(low)    | +<br>(low)             | -<br>(low)      | -<br>(moderate) |
| Obesity class III (≥40.0) vs. normal                                      | Positive for COVID-19                     | ++<br>(low)                                                                    |               | uncertain              | +<br>(low)      | - to +<br>(low) |
| <b>Respiratory conditions</b>                                             |                                           |                                                                                |               |                        |                 |                 |
| Chronic, varied (e.g., asthma, COPD)                                      | Community sample or positive for COVID-19 | -<br>(moderate)                                                                | uncertain     | uncertain              | -<br>(moderate) | -<br>(moderate) |
| Prior pneumonia                                                           | Community sample                          | -<br>(low)                                                                     |               |                        |                 |                 |
| <b>Cardiovascular disease</b>                                             |                                           |                                                                                |               |                        |                 |                 |
| Heart failure                                                             | Community sample                          | -<br>(low)                                                                     |               |                        |                 |                 |
|                                                                           | Positive for COVID-19                     | ++<br>(low)                                                                    |               |                        | +<br>(low)      | -<br>(low)      |
| Coronary artery disease, hypertension, hyperlipidemia, composite outcomes | Community sample or positive for COVID-19 | -<br>(moderate)                                                                | uncertain     | uncertain              | -<br>(low)      | -<br>(low)      |
| <b>Diabetes</b>                                                           | Community sample                          | -<br>(low)                                                                     |               |                        |                 |                 |
|                                                                           | Positive for COVID-19                     | ++<br>(low)                                                                    | uncertain     | -<br>(low)             | -<br>(low)      | -<br>(moderate) |
| <b>Liver disease</b>                                                      | Positive for COVID-19                     | -<br>(low)                                                                     |               |                        |                 | ++<br>(low)     |
|                                                                           | Hospitalized                              |                                                                                |               |                        |                 | -<br>(low)      |
| <b>Chronic kidney disease</b>                                             | Community sample or positive for COVID-19 | ++<br>(moderate)                                                               |               |                        | -<br>(moderate) | -<br>(moderate) |
| <b>Inflammatory bowel disease</b>                                         | Positive for COVID-19                     | -<br>(low)                                                                     |               |                        | -<br>(low)      |                 |
| <b>Dementia/chronic neurologic disorders</b>                              |                                           |                                                                                |               |                        |                 |                 |

| Risk factor<br>(at-risk vs. reference population) <sup>a</sup>                                                                                                                                                                                                  | Population <sup>b</sup>                   | Magnitude of association (confidence in association) <sup>c</sup> , by outcome |               |                        |                 |                                                |
|-----------------------------------------------------------------------------------------------------------------------------------------------------------------------------------------------------------------------------------------------------------------|-------------------------------------------|--------------------------------------------------------------------------------|---------------|------------------------|-----------------|------------------------------------------------|
|                                                                                                                                                                                                                                                                 |                                           | Hospitalization                                                                | ICU admission | Mechanical ventilation | Severe disease  | Mortality                                      |
| <i>Magnitude of associations are shown as: uncertain (no/very low confidence), no important association (-; OR or RR ≤1.70), moderate association (+; 1.71-1.99), large/important association (++; ≥2.00), or very large important association (+++; ≥5.00)</i> |                                           |                                                                                |               |                        |                 |                                                |
| Alzheimer's disease or dementia                                                                                                                                                                                                                                 | Community sample                          | ++<br>(low)                                                                    |               |                        |                 | -<br>(low)                                     |
| Chronic neurologic disorders                                                                                                                                                                                                                                    | Hospitalized                              |                                                                                |               |                        |                 | -<br>(low)                                     |
| <b>Cancer</b>                                                                                                                                                                                                                                                   |                                           |                                                                                |               |                        |                 |                                                |
| Any cancer                                                                                                                                                                                                                                                      | Positive for COVID-19                     | -<br>(moderate)                                                                |               |                        | -<br>(moderate) | -<br>(moderate)                                |
| Hematological malignancy                                                                                                                                                                                                                                        | Positive for COVID-19                     |                                                                                |               |                        |                 | +<br>(low)                                     |
| <b>Immunocompromised</b>                                                                                                                                                                                                                                        |                                           |                                                                                |               |                        |                 |                                                |
| Rheumatic disease                                                                                                                                                                                                                                               | Positive for COVID-19                     | uncertain                                                                      | uncertain     |                        |                 | uncertain                                      |
| Human immunodeficiency virus                                                                                                                                                                                                                                    | Hospitalized                              |                                                                                |               |                        |                 | uncertain                                      |
| <b>Mental health</b>                                                                                                                                                                                                                                            |                                           |                                                                                |               |                        |                 |                                                |
| Depression                                                                                                                                                                                                                                                      | Positive for COVID-19                     | -<br>(low)                                                                     |               |                        |                 |                                                |
| Ever visited a psychiatrist                                                                                                                                                                                                                                     | Community sample                          | -<br>(low)                                                                     |               |                        |                 |                                                |
| <b>Other factors</b>                                                                                                                                                                                                                                            |                                           |                                                                                |               |                        |                 |                                                |
| <b>Age<sup>d</sup></b>                                                                                                                                                                                                                                          |                                           |                                                                                |               |                        |                 |                                                |
| 45-54 vs. ≤45 years old                                                                                                                                                                                                                                         | Positive for COVID-19                     | ++<br>(moderate)                                                               |               |                        | -<br>(low)      | ++<br>(low)                                    |
| 50-64 vs. ≤45 years old                                                                                                                                                                                                                                         | Positive for COVID-19                     | ++<br>(moderate)                                                               |               |                        | -<br>(low)      | ++<br>(moderate)                               |
| >60 vs. ≤45 years old                                                                                                                                                                                                                                           | Positive for COVID-19                     | ++/+++<br>(moderate/low)                                                       |               | ++<br>(low)            | +<br>(low)      | ++/+++<br>(moderate/low)                       |
| >70 or 75 vs. ≤45 years old                                                                                                                                                                                                                                     | Positive for COVID-19                     | +++<br>(moderate)                                                              |               |                        | ++<br>(low)     | +++<br>(moderate)                              |
| >80 vs. ≤45 years old                                                                                                                                                                                                                                           | Positive for COVID-19                     | +++<br>(low)                                                                   |               |                        |                 | +++<br>(low)                                   |
| 70-79 vs. 65-69 years old                                                                                                                                                                                                                                       | Hospitalized                              |                                                                                |               |                        |                 | -<br>(moderate)                                |
| >80 vs. 65-69 years old                                                                                                                                                                                                                                         | Hospitalized                              |                                                                                |               |                        |                 | ++<br>(low)                                    |
| Increased age (continuous/incremental) <sup>e</sup>                                                                                                                                                                                                             | Community sample or positive for COVID-19 | Approximately 2-6% relative increase per year<br>(moderate)                    | -<br>(low)    | -<br>(low)             | -<br>(low)      | Approximately 5-10% relative increase per year |

| Risk factor<br>(at-risk vs. reference population) <sup>a</sup> | Population <sup>b</sup>                   | Magnitude of association (confidence in association) <sup>c</sup> , by outcome                                                                                                                                                                                  |                 |                        |                 |                 |
|----------------------------------------------------------------|-------------------------------------------|-----------------------------------------------------------------------------------------------------------------------------------------------------------------------------------------------------------------------------------------------------------------|-----------------|------------------------|-----------------|-----------------|
|                                                                |                                           | Hospitalization                                                                                                                                                                                                                                                 | ICU admission   | Mechanical ventilation | Severe disease  | Mortality       |
|                                                                |                                           | <i>Magnitude of associations are shown as: uncertain (no/very low confidence), no important association (-; OR or RR ≤1.70), moderate association (+; 1.71-1.99), large/important association (++; ≥2.00), or very large important association (+++; ≥5.00)</i> |                 |                        |                 |                 |
|                                                                |                                           |                                                                                                                                                                                                                                                                 |                 |                        |                 | (moderate)      |
| <b>Gender or sex</b>                                           |                                           |                                                                                                                                                                                                                                                                 |                 |                        |                 |                 |
| Male vs. female (all ages, mean 54 to 73)                      | Community sample                          | -<br>(low)                                                                                                                                                                                                                                                      |                 |                        |                 |                 |
|                                                                | Positive for COVID-19                     | ++<br>(moderate)                                                                                                                                                                                                                                                | uncertain       | +<br>(low)             | -<br>(low)      | -<br>(moderate) |
| Male vs. female (20-64 years) <sup>f</sup>                     | Hospitalized                              |                                                                                                                                                                                                                                                                 |                 |                        |                 | ++<br>(low)     |
| <b>Race/ethnicity</b>                                          |                                           |                                                                                                                                                                                                                                                                 |                 |                        |                 |                 |
| Black vs. non-Hispanic white                                   | Community sample or positive for COVID-19 | ++<br>(low)                                                                                                                                                                                                                                                     | -<br>(moderate) | -<br>(moderate)        | -<br>(moderate) | -<br>(moderate) |
| Hispanic vs. non-Hispanic white                                | Positive for COVID-19                     | -<br>(low)                                                                                                                                                                                                                                                      | uncertain       | -<br>(low)             | -<br>(low)      |                 |
| Asian vs. white                                                | Community sample or positive for COVID-19 | -<br>(moderate)                                                                                                                                                                                                                                                 | -<br>(low)      | -<br>(low)             | -<br>(low)      | -<br>(moderate) |
| Asian (Bangladeshi) vs. British white                          | Hospitalized                              |                                                                                                                                                                                                                                                                 |                 |                        |                 | ++<br>(low)     |
| <b>Culture/language/immigrant/refugee status</b>               |                                           |                                                                                                                                                                                                                                                                 |                 |                        |                 |                 |
| <b>Place of residence/household size</b>                       |                                           |                                                                                                                                                                                                                                                                 |                 |                        |                 |                 |
| Living in a low income area                                    | Positive for COVID-19                     | -<br>(low)                                                                                                                                                                                                                                                      |                 |                        |                 |                 |
| Homeless vs. has a home                                        | Positive for COVID-19                     | ++<br>(low)                                                                                                                                                                                                                                                     |                 |                        |                 |                 |
| Suburban vs. urban hospital                                    | Hospitalized                              |                                                                                                                                                                                                                                                                 |                 | uncertain              |                 |                 |
| 1, 3, or 4 vs. 2 household members                             | Community sample                          | -<br>(low)                                                                                                                                                                                                                                                      |                 |                        |                 |                 |
| <b>Occupation</b>                                              |                                           |                                                                                                                                                                                                                                                                 |                 |                        |                 |                 |
| Laryngologist or intubator vs. assistant                       | Healthcare workers for COVID-19 patients  | -<br>(low)                                                                                                                                                                                                                                                      |                 |                        |                 |                 |
| <b>Education level</b>                                         |                                           |                                                                                                                                                                                                                                                                 |                 |                        |                 |                 |
| Lower education vs. university degree                          | Community sample                          | -<br>(low)                                                                                                                                                                                                                                                      |                 |                        |                 |                 |
| <b>Socioeconomic status</b>                                    |                                           |                                                                                                                                                                                                                                                                 |                 |                        |                 |                 |

| Risk factor<br>(at-risk vs. reference population) <sup>a</sup>                | Population <sup>b</sup>                   | Magnitude of association (confidence in association) <sup>c</sup> , by outcome |               |                        |                |                 |
|-------------------------------------------------------------------------------|-------------------------------------------|--------------------------------------------------------------------------------|---------------|------------------------|----------------|-----------------|
|                                                                               |                                           | Hospitalization                                                                | ICU admission | Mechanical ventilation | Severe disease | Mortality       |
| Highest vs. lowest quintile of social deprivation                             | Community sample                          | +<br>(low)                                                                     |               |                        |                | -<br>(moderate) |
| Income ≤25 <sup>th</sup> vs. >50 <sup>th</sup> or 75 <sup>th</sup> percentile | Positive for COVID-19                     | ++<br>(low)                                                                    |               |                        |                |                 |
| ≥Average vs. below average income                                             | Community sample                          | -<br>(low)                                                                     |               |                        |                |                 |
| <b>Smoking</b>                                                                |                                           |                                                                                |               |                        |                |                 |
| Current or former vs. never                                                   | Community sample or positive for COVID-19 | -<br>(moderate)                                                                |               | uncertain              | -<br>(low)     | -<br>(low)      |
| <b>Alcohol consumption</b>                                                    |                                           |                                                                                |               |                        |                |                 |
| Above vs. within guidelines                                                   | Community sample or positive for COVID-19 | -<br>(low)                                                                     |               |                        |                |                 |
| <b>Physical activity level</b>                                                |                                           |                                                                                |               |                        |                |                 |
| Below vs. within guidelines                                                   | Community sample or positive for COVID-19 | -<br>(low)                                                                     |               |                        |                |                 |

COPD: chronic obstructive pulmonary disease; ICU: intensive care unit; OR: odds ratio; RR: risk ratio

<sup>a</sup> When not listed, the reference group are those without the risk factor.

<sup>b</sup> Outcomes of severe disease (as defined by authors), ICU admission, mechanical ventilation, and mortality are all in a hospitalized population, except for Liver Disease, where findings differed depending on the population denominator used.

<sup>c</sup> A formal assessment of the quality/confidence of the evidence was not performed but was informed by the Grading of Recommendations, Assessment, Development and Evaluations (GRADE) approach. We determined our confidence in the magnitude of the associations by considering primarily study limitations (risk of bias), consistency in findings across studies, and precision (sample size). Very low confidence indicates that we have no/very low confidence about possible associations; low means that the evidence indicates that there **may** be an association; moderate means that the evidence indicates that there **probably** is an association. High certainty evidence was not found for any association.

<sup>d</sup> For categorical data for age, and BMI, the reference group differed slightly across studies.

<sup>e</sup> For continuous or incremental data for age, the rate of hospitalization and mortality outcomes, approximately half of the studies analyzed data on a continuum (with the remainder reporting in incremental categories, e.g., 5-year units)

<sup>f</sup> Subgroup data from one study that analyzed the younger population separately

1  
2  
3 There was low or moderate certainty of evidence for important/large associations with increased  
4 hospitalization in people having confirmed COVID-19, for the following risk factors: obesity class III (body  
5 mass index  $\geq 40$  kg/m<sup>2</sup>; 1 study, n=5,297),[56] heart failure (2 studies, n=6,331),[30, 56] diabetes (2  
6 studies, n=6,331),[30, 56] chronic kidney disease (confirmed COVID-19 or community sample; 2 studies,  
7 n=424,073),[54, 56] dementia (1 study, n=418,794),[54] age over 45 years (vs. 45 or younger; 2 studies,  
8 n=6,331),[30, 56] male gender (3 studies, n=3,812),[30, 56, 58] black race/ethnicity (vs. non-Hispanic  
9 white; confirmed COVID-19 and community samples, 5 studies in 4 populations, n=428,606),[30, 51, 54,  
10 56, 58] homelessness (1 study, n=1,052),[30] and low income (<25<sup>th</sup> vs. >50<sup>th</sup> percentile; 1 study,  
11 n=1,052).[30] Age over 60 and over 70 years may be associated with important increases in the rate of  
12 mechanical ventilation (1 study, n=486)[47] and severe disease (1 study, n=2,725),[56] respectively.  
13  
14  
15  
16

17 There may be important associations for increased mortality with liver disease (2 studies, n=20,597),[40,  
18 60] Bangladeshi ethnicity (vs. British white; 1 study, n=130,091),[63] and age over 45 years (vs. <45  
19 years; 3 studies, n=87,819).[40, 56, 63] The data were somewhat inconsistent for gender, with most  
20 studies showing moderate certainty of no important effect, but one large fair quality study  
21 (n=130,091)[63] from the UK that stratified its analysis by age showed that hospitalized males aged 20-  
22 64 years (but not older) may be at about two-fold increased risk of mortality compared to females.  
23  
24  
25

26 Associations with hospitalization and mortality may be very large for those aged over 60 years (2  
27 studies, n=6,331 for hospitalization;[30, 56] 3 studies, n=24,163 for mortality[40, 48, 56]) and are  
28 probably very large for those over 70 years (2 studies, n=6,331 for hospitalization;[30, 56] 2 studies,  
29 n=22,858 for mortality[40, 56]). One study (n=63,094)[63] directly compared subgroups of older  
30 hospitalized adults, showing that compared to those aged 65-69 years, there may be no important  
31 association with mortality among adults aged 70-79 years, but the strength of associations may increase  
32 about a magnitude of 2-fold for those 80 years and older. Studies treating age on a continuum or across  
33 small increments consistently found that the magnitude of association for hospitalization and mortality  
34 increased with increasing age (e.g., approximately 2-6% and 5-10% relative increase per year) (3 studies  
35 in 2 populations, n=422,275 for hospitalization;[51, 54, 58] 11 studies, n=6,877 for mortality).[32-34, 38,  
36 42, 45, 52, 53, 55, 58, 62]  
37  
38  
39  
40

41 A moderate magnitude of association may exist between mechanical ventilation (4 studies, n=1,559)[45,  
42 47, 49, 53], ICU admission (2 studies, n=873),[45, 49] and severe disease (1 study, n=2,725)[56] and  
43 obesity (body mass index  $\geq 30$  or 40 kg/m<sup>2</sup>); severe disease and heart failure (1 study, n=2,725);[56]  
44 mortality and haematological malignancy (1 study, n=1,183);[59] mechanical ventilation and male  
45 gender (4 studies, n=881);[34, 47, 49, 53] and hospitalization and social deprivation (highest vs. lowest  
46 quintile; 1 study, n=340,996).[51]  
47  
48  
49  
50

51 There was moderate certainty evidence for no important increase in hospitalization with chronic  
52 respiratory conditions (4 studies in 3 populations, n=425,125),[30, 51, 54, 56] cardiovascular disease  
53 apart from heart failure (i.e., coronary artery disease, hypertension, hyperlipidaemia; 4 studies in 3  
54 populations, n=425,125),[30, 51, 54, 56] non-specific cancer (2 studies, n=6,331),[30, 56] Asian  
55 race/ethnicity other than Bangladeshi (vs. non-Hispanic white; 3 studies in 2 populations,  
56  
57  
58  
59  
60

n=424,073),[51, 54, 56] and current or former smoking (5 studies in 3 populations, n=425,125).[30, 46, 51, 54, 56] Additionally, there was moderate certainty evidence for no important increase in severe disease with chronic respiratory conditions (1 study, n=2,725),[56] chronic kidney disease (2 studies, n=2,922),[31, 56] nonspecific cancer (2 studies, n=2,769),[36, 56] and Black race/ethnicity (vs. non-Hispanic white; 2 studies, n=3,030);[43, 56] and no important increase in mortality with obesity (body mass index  $\geq 30$  kg/m<sup>2</sup>; 6 studies, n=8,716),[42, 45, 50, 53, 56, 58] chronic respiratory conditions (4 studies, n=23,315),[38, 40, 53, 56] diabetes (4 studies, n=23,315), [38, 40, 53, 56] chronic kidney disease (3 studies, n=23,058), nonspecific cancer (3 studies, n=24,041),[40, 56, 59] male gender (9 studies, n=27,875),[32-34, 38, 40, 42, 53, 56, 58] Black (5 studies, n=135,418)[45, 55, 56, 58, 63] or Asian race/ethnicity (vs. non-Hispanic white; 3 studies, n=4,015),[45, 55, 56] and social deprivation (lowest vs. highest quintile; 1 study, n=130,091).[63] Overall, there were few data for the ICU and mechanical ventilation outcomes.

## DISCUSSION

Responding to a need for empiric evidence to inform decision-making on Canada's immunization strategies,[11] in this rapid review we synthesized studies employing multivariate analysis to ascertain potential independent associations between "P<sup>2</sup>ROGRESS And Other Factors" and severe outcomes of COVID-19. Among 22 potential risk factors examined across the included studies, the most important risk factors (i.e., those associated with large/important increased risk or odds; RR or OR  $\geq 2.0$ ) for hospitalization among those with confirmed COVID-19 were several pre-existing chronic health conditions (obesity class III, heart failure, diabetes, chronic kidney disease [community sample or with COVID-19], dementia [community sample]), older age (>45 years vs. younger), male gender, Black race/ethnicity (community sample or with COVID-19), homelessness, and low income ( $\leq 25^{\text{th}}$  vs.  $>50^{\text{th}}$  percentile). Liver disease may have a large magnitude of association with increased mortality among people with COVID-19; advancing age (>45 years vs. younger) and Bangladeshi ethnicity (vs. British white) are likely to have large magnitude of associations with increased mortality among hospitalized patients. There is evidence to suggest that male gender may be associated with increased mortality among younger (20-64 years), but not older men.

Among the factors that increase the chance of severe outcomes, age seemed to be the most influential; adults older than 60 years may have at least 5 times the magnitude of association with hospitalization and mortality from COVID-19 compared to those aged less than 45 years. This association with increased hospitalization and mortality appears to magnify at least to some degree even for those older than 60 years, with those aged over 80 years possibly having double the magnitude of association for mortality of those aged 65-69 years.

The findings of this rapid review will be used to populate the Equity Matrix of NACI's Ethics, Equity, Feasibility, and Acceptability Framework,[13] which will be a part of a suite of considerations for informing the development of NACI recommendations on priority pandemic immunization strategies when initial COVID-19 vaccine supply is limited. NACI will be using the results of this rapid review and their current understanding of the epidemiology of COVID-19 in Canada to identify distinct inequities associated with COVID-19, potential reasons for these inequities, and suggested interventions to reduce



1  
2  
3 inequities and improve access to vaccine when it becomes available. The Equity Matrix applied to  
4 COVID-19 with evidence to-date can be found elsewhere.[15]  
5  
6

### 7 **Limitations of the Evidence**

8 There are several limitations to the evidence base. Though we focused the review on better quality  
9 studies that minimally controlled for age and sex, the strength of certain associations should be  
10 interpreted cautiously because there are likely to be multiple unmeasured confounders that have not  
11 been accounted for. For example, studies reporting on associations between outcomes and age did not  
12 adjust for nursing home residency and studies examining race did not account for occupation which may  
13 be an important confounder influencing susceptibility to the infection.[63] In addition, it is important to  
14 be aware that criteria for COVID-19 testing and hospitalization may differ by place and time, but it is  
15 difficult to predict how this may have impacted the findings. In general, many studies conducted testing  
16 based on symptoms and the evidence is likely most applicable to these populations. The evidence for  
17 mechanical ventilation, ICU admission, and severe disease outcomes was relatively sparse. As we  
18 located no evidence meeting our publication date and inclusion criteria to inform the impact of  
19 immigration or refugee status, religion or belief system, social capital, substance abuse disorders,  
20 pregnancy, Indigenous identity, living with a disability, nor differing levels of risk among children in  
21 various age groups, there is a need for high quality primary research (accounting for multiple  
22 confounders) to better understand the magnitude of association with these risk factors. Given the rapid  
23 emergence of new evidence on the topic, potential associations (or lack of association) for which only  
24 low or very low certainty of evidence is available should continue to be reviewed as new primary  
25 research is published.  
26  
27  
28  
29  
30  
31  
32

### 33 **Strengths and Limitations of the Review**

34 Our analysis across a large range of risk factors by detailed outcomes along the continuum of the natural  
35 history of COVID-19 disease highlights the methodological rigour and comprehensiveness of the present  
36 work. Whereas many rapid reviews omit all assessment of study quality and certainty of the evidence,  
37 we felt this was critical for rigour of interpretation and undertook these steps. Given our rapid approach,  
38 it is possible that studies were missed and that undetected errors in data exist. We mitigated this by  
39 piloting the screening and data extraction process and using experienced reviewers, and it is unlikely  
40 that any important studies were missed that would have altered the findings of the review.[64] We  
41 conducted risk of bias assessments at the study level, rather than at the outcome level, and  
42 incorporated these into our GRADE assessments at the risk factor-outcome-population level. Given that  
43 our eligibility criteria narrowed inclusion to higher quality studies that were most applicable to the  
44 review objective, it is unlikely that our appraisals of the certainty of evidence would be substantially  
45 impacted. Nevertheless, an in-depth evaluation of the study quality at the outcome level may be worth  
46 undertaking if feasible in future work.  
47  
48  
49  
50  
51

52 The evidence presented in this review should be interpreted as most applicable to people with COVID-  
53 19 symptoms or in general populations, but not necessarily to those with severe infections because  
54 studies focused solely on patients with severe COVID-19 (i.e., in ICU settings) were excluded. Most  
55 studies of patients in the ICU setting that we located were relatively small and descriptive in nature,  
56  
57  
58  
59  
60

such that many would have been otherwise excluded, due to lack of adjustment, or only have been able to provide low or very low certainty evidence due to their lack of precision. Additionally, generalizations to other countries should be made with caution, as high-risk groups in these populations may differ.

## FIGURE

Figure 1. PRISMA flow of study selection

## ACKNOWLEDGMENTS

We would like to thank the National Advisory Committee on Immunization (NACI) High Consequence Infectious Disease Vaccine Working Group (Caroline Quach, Shelley Deeks, Yen Bui, Kathleen Dooling, Robyn Harrison, Kyla Hildebrand, Michelle Murti, Jesse Papenburg, Robert Pless, Nathan Stall, and Stephen Vaughan) for their contributions to the project. We also thank Liz Dennett (MLIS) for conducting the Medline search, and Karyn Crawford for assisting with article retrieval.

## ABBREVIATIONS

|                        |                                                                                                                                                                                                                                           |
|------------------------|-------------------------------------------------------------------------------------------------------------------------------------------------------------------------------------------------------------------------------------------|
| COVID-19               | Novel coronavirus disease 2019                                                                                                                                                                                                            |
| ICU                    | Intensive care unit                                                                                                                                                                                                                       |
| NACI                   | National Advisory Committee on Immunization                                                                                                                                                                                               |
| OECD                   | Organisation for Economic Co-operation and Development                                                                                                                                                                                    |
| OR                     | Odds ratio                                                                                                                                                                                                                                |
| P <sup>2</sup> ROGRESS | Pre-existing disease or disability, place of residence, race, ethnicity, culture, language, immigrant/refugee status, occupation, gender, religion/belief system, education, socioeconomic status, social capital, age, and other factors |
| RR                     | Risk ratio                                                                                                                                                                                                                                |

**REFERENCES**

1. World Health Organization. Naming the coronavirus disease (COVID-19) and the virus that causes it 2020. [https://www.who.int/emergencies/diseases/novel-coronavirus-2019/technical-guidance/naming-the-coronavirus-disease-\(covid-2019\)-and-the-virus-that-causes-it](https://www.who.int/emergencies/diseases/novel-coronavirus-2019/technical-guidance/naming-the-coronavirus-disease-(covid-2019)-and-the-virus-that-causes-it) (accessed 31 July 2020).
2. World Health Organization. Coronavirus Disease 2019 (COVID-19): Situation Report - 51. Geneva, Switzerland: World Health Organization 2020. <https://www.who.int/docs/default-source/coronaviruse/situation-reports/20200311-sitrep-51-covid-19.pdf> (accessed 24 Aug 2020).
3. World Health Organization. Coronavirus Disease 2019 (COVID-19): Weekly Epidemiological Update 17. Geneva, Switzerland: World Health Organization 2020. <https://www.who.int/publications/m/item/weekly-epidemiological-update-8-december-2020> (accessed 14 Dec 2020).
4. Rodriguez-Morales AJ, Cardona-Ospina JA, Gutiérrez-Ocampo E, et al. Clinical, laboratory and imaging features of COVID-19: A systematic review and meta-analysis. *Travel Med Infect Dis* 2020;34:101623.
5. Government of Canada. Coronavirus disease 2019 (COVID-19): Epidemiology update. Ottawa, Canada: Government of Canada 2020. <https://health-infobase.canada.ca/src/data/covidLive/Epidemiological-summary-of-COVID-19-cases-in-Canada-Canada.ca.pdf> (accessed 24 Aug 2020).
6. World Health Organization. Accelerating a safe and effective COVID-19 vaccine Geneva, Switzerland: World Health Organization 2020. <https://www.who.int/emergencies/diseases/novel-coronavirus-2019/global-research-on-novel-coronavirus-2019-ncov/accelerating-a-safe-and-effective-covid-19-vaccine> (accessed 31 July 2020).
7. Health Canada. Statement on UK's authorization of its first COVID-19 vaccine, manufactured by Pfizer/BioNTech. Ottawa, Canada: Health Canada 2020. <https://www.canada.ca/en/health-canada/news/2020/12/statement-on-uks-authorization-of-its-first-covid-19-vaccine-manufactured-by-pfizerbiontech.html> (accessed 14 Dec 2020).
8. Health Canada. Vaccines and treatments for COVID-19: Progress. Ottawa, Canada: Health Canada 2020. <https://www.canada.ca/en/public-health/services/diseases/2019-novel-coronavirus-infection/prevention-risks/covid-19-vaccine-treatment.html> (accessed 14 Dec 2020).
9. World Health Organization. Draft landscape of COVID-19 candidate vaccines. Geneva, Switzerland: World Health Organization 2020. <https://www.who.int/publications/m/item/draft-landscape-of-covid-19-candidate-vaccines> (accessed 14 Dec 2020).
10. Thanh Le T, Andreadakis Z, Kumar A, et al. The COVID-19 vaccine development landscape. *Nat Rev Drug Discov* 2020;19(5):305-6.
11. Government of Canada. Research priorities for COVID-19 vaccines to support public health decisions. Ottawa, Canada: Government of Canada 2020. <https://www.canada.ca/en/public-health/services/immunization/national-advisory-committee-on-immunization-naci/research-priorities-covid-19-vaccines.html> (accessed 24 Aug 2020).
12. Government of Canada. National Advisory Committee on Immunization (NACI): Membership and representation. Ottawa, Canada: Government of Canada 2020. <https://www.canada.ca/en/public->

- 1  
2  
3 [health/services/immunization/national-advisory-committee-on-immunization-naci/naci-membership-](https://www.naci.org/health-services/immunization/national-advisory-committee-on-immunization-naci/naci-membership-representation.html)  
4 [representation.html](https://www.naci.org/health-services/immunization/national-advisory-committee-on-immunization-naci/naci-membership-representation.html) (accessed 24 Aug 2020).  
5
- 6 13. Ismail SJ, Hardy K, Tunis M. A framework for the systematic consideration of ethics, equity, feasibility,  
7 and acceptability in vaccine program recommendations. *Vaccine* 2020;38(36):5861-76.  
8
- 9 14. Evans T, Brown H. Road traffic crashes: operationalizing equity in the context of health sector reform. *Inj*  
10 *Control Saf Promot* 2003;10(1-2):11-2.  
11
- 12 15. Ismail SJ, Tunis MC, Zhao L, et al. Navigating inequities: a roadmap out of the pandemic. Submitted to  
13 BMJ Aug 2020.  
14
- 15 16. Hamel C, Michaud A, Thuku M, et al. Defining rapid reviews: a systematic scoping review and thematic  
16 analysis of definitions and defining characteristics of rapid reviews. *J Clin Epidemiol* 2021;129:74-85.  
17
- 18 17. Hartling L, Guise J-M, Kato E, et al. A taxonomy of rapid reviews links report types and methods to  
19 specific decision-making contexts. *J Clin Epidemiol* 2015;68(12):1451-62.e3.  
20
- 21 18. Tricco AC, Langlois EV, Straus SE (editors). Rapid reviews to strengthen health policy and systems: a  
22 practical guide. Geneva, Switzerland: World Health Organization 2017.  
23
- 24 19. Higgins J, Thomas J, Chandler J, et al. Cochrane Handbook for Systematic Reviews of Interventions. 2nd  
25 Edition. Chinchester, UK: John Wiley & Sons 2019.  
26
- 27 20. Liberati A, Altman DG, Tetzlaff J, et al. The PRISMA statement for reporting systematic reviews and  
28 meta-analyses of studies that evaluate healthcare interventions: explanation and elaboration. *BMJ*  
29 2009;339:b2700.  
30
- 31 21. Organisation for Economic Cooperation and Development. Member countries 2020.  
32 <https://www.oecd.org/about/members-and-partners/> (accessed 24 Aug 2020).  
33
- 34 22. Fraser Institute. Comparing Performance of Universal Health Care Countries, 2019.  
35 [https://www.fraserinstitute.org/studies/comparing-performance-of-universal-health-care-countries-](https://www.fraserinstitute.org/studies/comparing-performance-of-universal-health-care-countries-2019)  
36 [2019](https://www.fraserinstitute.org/studies/comparing-performance-of-universal-health-care-countries-2019) (accessed 24 Aug 2020).  
37
- 38 23. O'Neill J, Tabish H, Welch V, et al. Applying an equity lens to interventions: using PROGRESS ensures  
39 consideration of socially stratifying factors to illuminate inequities in health. *J Clin Epidemiol*  
40 2014;67(1):56-64.  
41
- 42 24. Oliver S, Kavanagh J, Caird J, et al. Health promotion, inequalities and young people's health: a  
43 systematic review of research. London, UK: EPPI-Centre, Social Science Research Unit, Institute of  
44 Education, University of London 2008.  
45
- 46 25. Guyatt GH, Oxman AD, Sultan S, et al. GRADE guidelines: 9. Rating up the quality of evidence. *J Clin*  
47 *Epidemiol* 2011;64(12):1311-6.  
48
- 49 26. Guyatt G, Oxman AD, Akl EA, et al. GRADE guidelines: 1. Introduction-GRADE evidence profiles and  
50 summary of findings tables. *J Clin Epidemiol* 2011;64(4):383-94.  
51
- 52 27. Murad MH, Mustafa RA, Schünemann HJ, et al. Rating the certainty in evidence in the absence of a  
53 single estimate of effect. *Evid Based Med* 2017;22(3):85-7.  
54  
55  
56  
57  
58  
59  
60

- 1
- 2
- 3 28. Iorio A, Spencer FA, Flavigna M, et al. Use of GRADE for assessment of evidence about prognosis: rating
- 4 confidence in estimates of event rates in broad categories of patients. *BMJ* 2015;350:h870.
- 5
- 6 29. Santesso N, Glenton C, Dahm P, et al. GRADE guidelines 26: informative statements to communicate the
- 7 findings of systematic reviews of interventions. *J Clin Epidemiol* 2020;119:126-35.
- 8
- 9 30. Azar KMJ, Shen Z, Romanelli RJ, et al. Disparities in outcomes among COVID-19 patients in a large health
- 10 care system in California. *Health Aff (Millwood)* 2020:101377hlthaff202000598.
- 11
- 12 31. Bhargava A, Fukushima EA, Levine M, et al. Predictors for severe COVID-19 infection. *Clin Infect Dis*
- 13 2020.
- 14
- 15 32. Bianchetti A, Rozzini R, Guerini F, et al. Clinical presentation of COVID19 in dementia patients. *J Nutr*
- 16 *Health Aging* 2020;24(6):560-2.
- 17
- 18 33. Borobia AM, Carcas AJ, Arnalich F, et al. A cohort of patients with COVID-19 in a major teaching hospital
- 19 in Europe. *J Clin Med* 2020;9(6).
- 20
- 21 34. Busetto L, Bettini S, Fabris R, et al. Obesity and COVID-19: an Italian snapshot. *Obesity (Silver Spring)*
- 22 2020.
- 23
- 24 35. Cecconi M, Piovani D, Brunetta E, et al. Early predictors of clinical deterioration in a cohort of 239
- 25 patients hospitalized for COVID-19 infection in Lombardy, Italy. *J Clin Med* 2020;9(5).
- 26
- 27 36. Colaneri M, Sacchi P, Zuccaro V, et al. Clinical characteristics of coronavirus disease (COVID-19) early
- 28 findings from a teaching hospital in Pavia, North Italy, 21 to 28 February 2020. *Euro Surveill* 2020;25(16).
- 29
- 30 37. Covino M, De Matteis G, Santoro M, et al. Clinical characteristics and prognostic factors in COVID-19
- 31 patients aged  $\geq 80$  years. *Geriatrics & Gerontology International* 2020.
- 32
- 33 38. Cummings MJ, Baldwin MR, Abrams D, et al. Epidemiology, clinical course, and outcomes of critically ill
- 34 adults with COVID-19 in New York City: a prospective cohort study. *medRxiv* 2020.
- 35
- 36 39. D'Silva KM, Serling-Boyd N, Wallwork R, et al. Clinical characteristics and outcomes of patients with
- 37 coronavirus disease 2019 (COVID-19) and rheumatic disease: a comparative cohort study from a US 'hot
- 38 spot'. *Ann Rheum Dis* 2020.
- 39
- 40 40. Docherty AB, Harrison EM, Green CA, et al. Features of 20 133 UK patients in hospital with covid-19
- 41 using the ISARIC WHO clinical characterisation protocol: prospective observational cohort study. *BMJ*
- 42 *(Clin Res Ed)* 2020;369:m1985.
- 43
- 44 41. El-Boghdady K, Wong DJN, Owen R, et al. Risks to healthcare workers following tracheal intubation of
- 45 patients with COVID-19: a prospective international multicentre cohort study. *Anaesthesia* 2020.
- 46
- 47 42. Giacomelli A, Ridolfo AL, Milazzo L, et al. 30-day mortality in patients hospitalized with COVID-19 during
- 48 the first wave of the Italian epidemic: A prospective cohort study. *Pharmacol Res* 2020;158:104931.
- 49
- 50 43. Gold JAW, Wong KK, Szablewski CM, et al. Characteristics and clinical outcomes of adult patients
- 51 hospitalized with COVID-19 - Georgia, March 2020. *MMWR Surveill Summ* 2020;69(18):545-50.
- 52
- 53
- 54
- 55
- 56
- 57
- 58
- 59
- 60

- 1  
2  
3 44. Hajifathalian K, Krisko T, Mehta A, et al. Gastrointestinal and hepatic manifestations of 2019 novel  
4 coronavirus disease in a large cohort of infected patients from New York: clinical implications.  
5 *Gastroenterol* 2020.  
6  
7 45. Hajifathalian K, Kumar S, Newberry C, et al. Obesity is associated with worse outcomes in COVID-19:  
8 analysis of early data from New York City. *Obesity (Silver Spring)* 2020.  
9  
10 46. Hamer M, Kivimaki M, Gale CR, et al. Lifestyle risk factors, inflammatory mechanisms, and COVID-19  
11 hospitalization: A community-based cohort study of 387,109 adults in UK. *Brain Behav Immun* 2020.  
12  
13 47. Hur K, Price CPE, Gray EL, et al. Factors associated with intubation and prolonged intubation in  
14 hospitalized patients with COVID-19. *JAMA Otolaryngol Head Neck Surg* 2020:194599820929640.  
15  
16 48. Imam Z, Odish F, Gill I, et al. Older age and comorbidity are independent mortality predictors in a large  
17 cohort of 1305 COVID-19 patients in Michigan, United States. *J Intern Med* 2020.  
18  
19 49. Kalligeros M, Shehadeh F, Mylona EK, et al. Association of obesity with disease severity among patients  
20 with coronavirus disease 2019. *Obesity (Silver Spring)* 2020.  
21  
22 50. Klang E, Kassim G, Soffer S, et al. Morbid obesity as an independent risk factor for COVID-19 mortality in  
23 hospitalized patients younger than 50. *Obesity (Silver Spring)* 2020.  
24  
25 51. Lassale C, Gaye B, Hamer M, et al. Ethnic disparities in hospitalisation for COVID-19 in England: The role  
26 of socioeconomic factors, mental health, and inflammatory and pro-inflammatory factors in a  
27 community-based cohort study. *Brain Behav Immun* 2020.  
28  
29 52. Okoh AK, Sossou C, Dangayach NS, et al. Coronavirus disease 19 in minority populations of Newark, New  
30 Jersey. *Int J Equity Health* 2020;19(1):93.  
31  
32 53. Palaiodimos L, Kokkinidis DG, Li W, et al. Severe obesity, increasing age and male sex are independently  
33 associated with worse in-hospital outcomes, and higher in-hospital mortality, in a cohort of patients  
34 with COVID-19 in the Bronx, New York. *Metabolism* 2020;108:154262.  
35  
36 54. Patel AP, Paranjpe MD, Kathiresan NP, et al. Race, socioeconomic deprivation, and hospitalization for  
37 COVID-19 in English participants of a national biobank. *medRxiv* 2020.  
38  
39 55. Perez-Guzman PN, Daunt A, Mukherjee S, et al. Report 17: Clinical characteristics and predictors of  
40 outcomes of hospitalized patients with COVID-19 in a London NHS Trust: a retrospective cohort study.  
41 *Imperial College London* 2020.  
42  
43 56. Petrilli CM, Jones SA, Yang J, et al. Factors associated with hospital admission and critical illness among  
44 5279 people with coronavirus disease 2019 in New York City: prospective cohort study. *BMJ (Clin Res Ed)*  
45 2020;369:m1966.  
46  
47 57. Piano S, Dalbeni A, Vettore E, et al. Abnormal liver function tests predict transfer to intensive care unit  
48 and death in COVID-19. *Liv Int* 2020.  
49  
50 58. Price-Haywood EG, Burton J, Fort D, Seoane L. Hospitalization and mortality among black patients and  
51 white patients with COVID-19. *NEJM* 2020.  
52  
53  
54  
55  
56  
57  
58  
59  
60

- 1  
2  
3 59. Shah V, Ko Ko T, Zuckerman M, et al. Poor outcome and prolonged persistence of SARS-CoV-2 RNA in  
4 COVID-19 patients with haematological malignancies: King's College Hospital experience. *Br J Haematol*  
5 2020.  
6  
7 60. Singh S, Khan A. clinical characteristics and outcomes of COVID-19 among patients with pre-existing liver  
8 disease in United States: a multi-center research network study. *Gastroenterol* 2020.  
9  
10 61. Singh S, Khan A, Chowdhry M, et al. Risk of severe COVID-19 in patients with inflammatory bowel  
11 disease in United States: a multicenter research network study. *Gastroenterol* 2020.  
12  
13 62. Violi F, Cangemi R, Romiti GF, et al. Is albumin predictor of mortality in COVID-19? *Antioxid Redox Signal*  
14 2020.  
15  
16 63. Public Health England. Disparities in the risk and outcomes of COVID-19. London, UK: Public Health  
17 England 2020.  
18  
19 64. Waffenschmidt S, Knelangen M, Sieben W, et al. Single screening versus conventional double screening  
20 for study selection in systematic reviews: a methodological systematic review. *BMC Med Res Methodol*  
21 2019;19(1):132.  
22  
23  
24  
25  
26  
27  
28  
29  
30  
31  
32  
33  
34  
35  
36  
37  
38  
39  
40  
41  
42  
43  
44  
45  
46  
47  
48  
49  
50  
51  
52  
53  
54  
55  
56  
57  
58  
59  
60

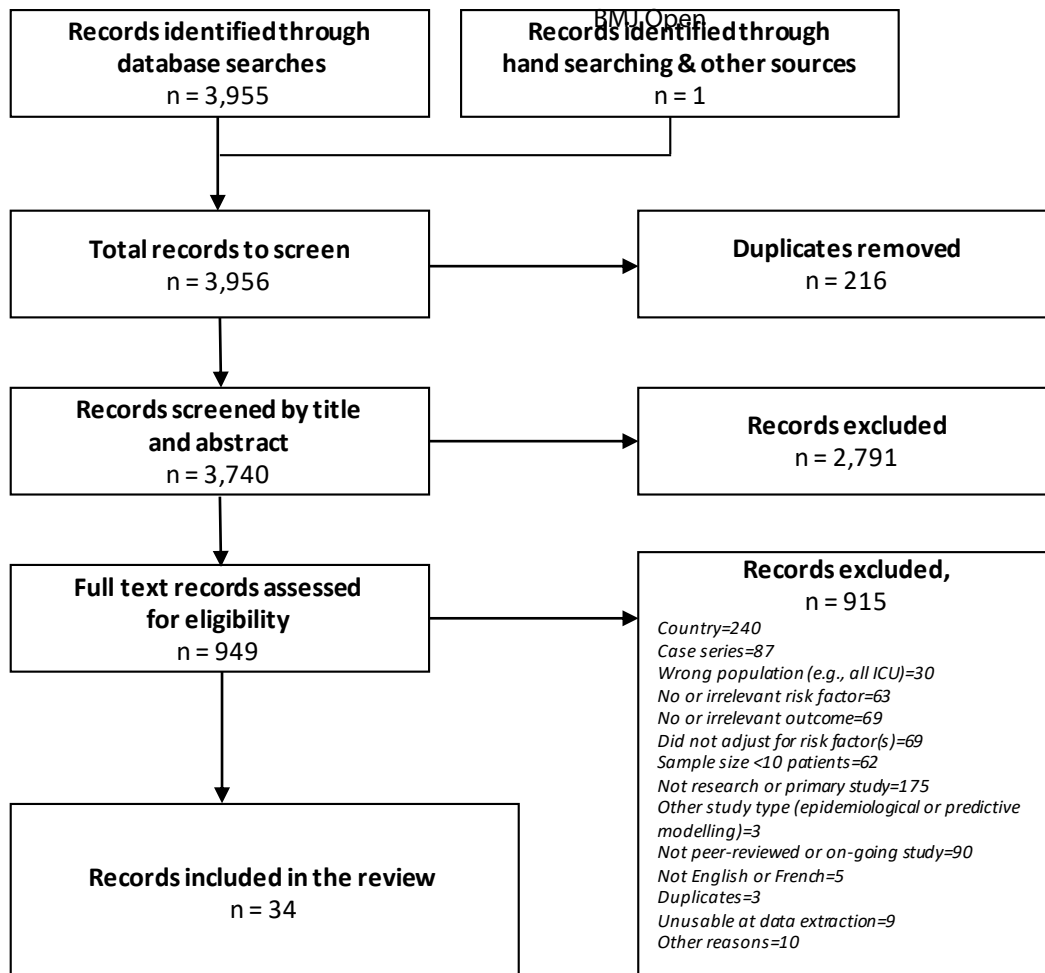

For peer review only - <http://bmjopen.bmj.com/site/about/guidelines.xhtml>

29  
30  
31  
Figure 1. PRISMA flow of study selection



1  
2  
3  
4  
5  
6  
7  
8  
9  
10  
11  
12  
13  
14  
15  
16  
17  
18  
19  
20  
21  
22  
23  
24  
25  
26  
27  
28  
29  
30  
31  
32  
33  
34  
35  
36  
37  
38  
39  
40  
41  
42  
43  
44  
45  
46  
47  
48  
49  
50  
51  
52  
53  
54  
55  
56  
57  
58  
59  
60

**Supplement File**

| <b>Supplement</b> | <b>Title</b>                               | <b>Page</b> |
|-------------------|--------------------------------------------|-------------|
| 1                 | Search strategy                            | 2           |
| 2                 | Eligibility criteria                       | 4           |
| 3                 | Excluded studies                           | 6           |
| 4                 | Characteristics of included studies        | 73          |
| 5                 | All results data from the included studies | 84          |

For peer review only

## Supplement 1. Search strategy

### Ovid MEDLINE(R) All 1946 to June 15, 2020

|    |                                                                                                                                                                                                                                                                                                                                                                                                                                                                                                                                                                                                                                                                                                                                                                                                                                                            |
|----|------------------------------------------------------------------------------------------------------------------------------------------------------------------------------------------------------------------------------------------------------------------------------------------------------------------------------------------------------------------------------------------------------------------------------------------------------------------------------------------------------------------------------------------------------------------------------------------------------------------------------------------------------------------------------------------------------------------------------------------------------------------------------------------------------------------------------------------------------------|
| 1  | (Risk factor* or relative risk or odds ratio or between group* or Regression or multi-variate or multivaria* or covariate or univariate or co-variate or matching or ANOVA or Analysis of variance or ANCOVA or Correlation or Covariance or Principal Component Analysis or cohort* or follow-up or prognos* or predict*).mp.                                                                                                                                                                                                                                                                                                                                                                                                                                                                                                                             |
| 2  | exp cohort studies/ or cohort*.mp.                                                                                                                                                                                                                                                                                                                                                                                                                                                                                                                                                                                                                                                                                                                                                                                                                         |
| 3  | ("Associated with" or "Association of" or "impact of" or "Correlated with" or "Impact* on" or characteristics or characterise or features or clinical findings or clinical outcomes or clinical manifestations or clinical course).ti.                                                                                                                                                                                                                                                                                                                                                                                                                                                                                                                                                                                                                     |
| 4  | (clinical data or (clinical adj5 (characteristics or features or manifestations))).tw,kf.                                                                                                                                                                                                                                                                                                                                                                                                                                                                                                                                                                                                                                                                                                                                                                  |
| 5  | 1 or 2 or 3 or 4                                                                                                                                                                                                                                                                                                                                                                                                                                                                                                                                                                                                                                                                                                                                                                                                                                           |
| 6  | (Mortal* or fatal* or death* or died or discharged alive or poor prognos* or good prognos* or clinical outcome* or adverse outcome* or disease course or clinical course or ((severe* or serious* or critical*) adj4 (ill* or outcome* or course or case or cases or patient* or condition)) or Severity or ((ICU or hospital or intensive care) adj7 (admission* or admit*)) or Ventilator* or ventilation or Hospitaliz* or hospitalis* or (Length adj3 stay)).mp.                                                                                                                                                                                                                                                                                                                                                                                       |
| 7  | ((pregnan* or maternal or perinatal or birth or neonat* or infant*) adj7 outcome*).mp.                                                                                                                                                                                                                                                                                                                                                                                                                                                                                                                                                                                                                                                                                                                                                                     |
| 8  | 6 or 7                                                                                                                                                                                                                                                                                                                                                                                                                                                                                                                                                                                                                                                                                                                                                                                                                                                     |
| 9  | 5 and 8                                                                                                                                                                                                                                                                                                                                                                                                                                                                                                                                                                                                                                                                                                                                                                                                                                                    |
| 10 | (Coronavirus* or corona-virus* or betacoronavirus* or nCOV* or 2019nCoV or 2019-ncov or covid or covid19 or SARS-CoV* or SARSCov*).mp.                                                                                                                                                                                                                                                                                                                                                                                                                                                                                                                                                                                                                                                                                                                     |
| 11 | limit 10 to yr="2020 -Current"                                                                                                                                                                                                                                                                                                                                                                                                                                                                                                                                                                                                                                                                                                                                                                                                                             |
| 12 | limit 11 to abstracts                                                                                                                                                                                                                                                                                                                                                                                                                                                                                                                                                                                                                                                                                                                                                                                                                                      |
| 13 | (11 not 12) and (1 or 2 or 3 or 4 or 6 or 7)                                                                                                                                                                                                                                                                                                                                                                                                                                                                                                                                                                                                                                                                                                                                                                                                               |
| 14 | 9 and 11                                                                                                                                                                                                                                                                                                                                                                                                                                                                                                                                                                                                                                                                                                                                                                                                                                                   |
| 15 | 13 or 14                                                                                                                                                                                                                                                                                                                                                                                                                                                                                                                                                                                                                                                                                                                                                                                                                                                   |
| 16 | (exp China/ or Iran/ or exp Russia/) not (canada/ or exp united states/ or europe/ or austria/ or belgium/ or exp france/ or exp germany/ or exp united kingdom/ or exp italy/ or spain/ or netherlands/ or exp "scandinavian and nordic countries"/ or australia/ or new zealand/ or mexico/ or chile/ or colombia/ or exp japan/ or korea/ or exp "republic of korea"/ or baltimore/ or berlin/ or boston/ or chicago/ or "district of columbia"/ or london/ or los angeles/ or new orleans/ or new york city/ or paris/ or philadelphia/ or rome/ or san francisco/ or estonia/ or latvia/ or lithuania/ or czech republic/ or hungary/ or poland/ or slovakia/ or slovenia/ or greece/ or luxembourg/ or portugal/ or switzerland/ or israel/ or turkey/)                                                                                              |
| 17 | ((China or wuhan or hubei or beijing).tw,kf. and china.in.) not (canada or italy or italian or spain or spanish or france or french or united kingdom or UK or england or english or NHS or ireland or irish or wales or welsh or scotland or scottish or german* or austria* or sweden or swedish or netherlands or norwegian or norway or finland or finnish or denmark or danish or european or belgium or belgian or Czech or Estonia* or Greece or Greek or Hungar* or Latvia* or Lithuania* or Luxembourg or Iceland* or Poland or Portugal or Slovak Republic or Slovenia* or Switzerland or Japan* or Tokyo or Korea* or Seoul or Chile* or Colombia* or Mexico or Mexican or Israel* or Turkey or Turkish or australia* or new zealand* or united states or USA or american or "U.S." or new york or california* or washington or seattle).tw,kf. |

|    |                                                                                                                                                                                                                                                                                                                                                                                                                                                                                                                                                                                                                                                                                                                                                                                                                                             |
|----|---------------------------------------------------------------------------------------------------------------------------------------------------------------------------------------------------------------------------------------------------------------------------------------------------------------------------------------------------------------------------------------------------------------------------------------------------------------------------------------------------------------------------------------------------------------------------------------------------------------------------------------------------------------------------------------------------------------------------------------------------------------------------------------------------------------------------------------------|
| 18 | ((russia* or iran* or tehran or brazil*) not (canada or italy or italian or spain or spanish or france or french or united kingdom or UK or england or english or NHS or ireland or irish or wales or welsh or scotland or scottish or german* or austria* or sweden or swedish or netherlands or norwegian or norway or finland or finnish or denmark or danish or european or belgium or belgian or Czech or Estonia* or Greece or Greek or Hungar* or Latvia* or Lithuania* or Luxembourg or Iceland* or Poland or Portugal or Slovak Republic or Slovenia* or Switzerland or Japan* or Tokyo or Korea* or Seoul or Chile* or Colombia* or Mexico or Mexican or Israel* or Turkey or Turkish or australia* or new zealand* or united states or USA or american or "U.S." or new york or california* or washington or seattle)).tw,kf.    |
| 19 | ((china or russia or iran or tehran or Brazil) not (canada or italy or italian or spain or spanish or france or french or united kingdom or UK or england or english or NHS or ireland or irish or wales or welsh or scotland or scottish or german* or austria* or sweden or swedish or netherlands or norwegian or norway or finland or finnish or denmark or danish or european or belgium or belgian or Czech or Estonia* or Greece or Greek or Hungar* or Latvia* or Lithuania* or Luxembourg or Iceland* or Poland or Portugal or Slovak Republic or Slovenia* or Switzerland or Japan* or Tokyo or Korea* or Seoul or Chile* or Colombia* or Mexico or Mexican or Israel* or Turkey or Turkish or australia* or new zealand* or united states or USA or american or "U.S." or new york or california* or washington or seattle)).in. |
| 20 | 15 not (16 or 17 or 18 or 19)                                                                                                                                                                                                                                                                                                                                                                                                                                                                                                                                                                                                                                                                                                                                                                                                               |
| 21 | limit 20 to (english or french)                                                                                                                                                                                                                                                                                                                                                                                                                                                                                                                                                                                                                                                                                                                                                                                                             |
| 22 | limit 21 to editorial                                                                                                                                                                                                                                                                                                                                                                                                                                                                                                                                                                                                                                                                                                                                                                                                                       |
| 23 | 21 not 22                                                                                                                                                                                                                                                                                                                                                                                                                                                                                                                                                                                                                                                                                                                                                                                                                                   |
| 24 | Remove duplicates from 23                                                                                                                                                                                                                                                                                                                                                                                                                                                                                                                                                                                                                                                                                                                                                                                                                   |

### Online databases, hand-searched up to June 12, 2020:

Epistimonikos COVID-19 in L\*VE Platform (epidemiology, etiology and prognosis questions) at:  
[https://app.iloveevidence.com/loves/5e6fdb9669c00e4ac072701d?utm=epdb\\_en](https://app.iloveevidence.com/loves/5e6fdb9669c00e4ac072701d?utm=epdb_en)

McMaster COVID-19 Evidence Alerts (prognosis or etiology studies) at:  
<https://plus.mcmaster.ca/COVID-19/>

## Supplement 2. Eligibility criteria

| Criterion                       | Include                                                                                                                                                                                                                                                                                                                                                                                                                                                                                                                                                                                                                                                                                                                                                                                                                                                                                                                                                                                                                                                                                           | Exclude                                                                                                                                                                                                                                                                                    |
|---------------------------------|---------------------------------------------------------------------------------------------------------------------------------------------------------------------------------------------------------------------------------------------------------------------------------------------------------------------------------------------------------------------------------------------------------------------------------------------------------------------------------------------------------------------------------------------------------------------------------------------------------------------------------------------------------------------------------------------------------------------------------------------------------------------------------------------------------------------------------------------------------------------------------------------------------------------------------------------------------------------------------------------------------------------------------------------------------------------------------------------------|--------------------------------------------------------------------------------------------------------------------------------------------------------------------------------------------------------------------------------------------------------------------------------------------|
| <b>Population/<br/>Exposure</b> | <p>P<sup>2</sup>ROGRESS risk factors<sup>1</sup>, with or without infection with COVID-19<sup>2</sup></p> <p><sup>1</sup>Risk factors include:</p> <ul style="list-style-type: none"> <li>- Pre-existing disease/condition, disability (e.g., chronic disease, immunocompromised, pregnancy)</li> <li>- Place/state of residence (e.g., remote, overcrowding, homeless, institutionalization)</li> <li>- Race/ethnicity/culture/language/immigrant/refugee status</li> <li>- Occupation</li> <li>- Gender identity/sex</li> <li>- Religion/belief system</li> <li>- Education/literacy level</li> <li>- Socio-economic status</li> <li>- Social capital (e.g., social support/networks/trust)</li> <li>- Age</li> <li>- Other (risk behaviours e.g., drug and alcohol use disorders, smoking)</li> </ul> <p><sup>2</sup>COVID-19 infection may include lab-confirmed, or epidemiologically-linked cases (e.g., transmission/cases within households). Cases with co-infections (e.g., influenza such as H1N1) will be accepted, but may be analyzed separately from COVID-19-only infections.</p> | <p>Studies including populations with pandemic-related infections (e.g., SARS, MERS) without data isolated for COVID-19</p>                                                                                                                                                                |
| <b>Comparator</b>               | <p>Staged, in the following order:</p> <ol style="list-style-type: none"> <li>i) The same P<sup>2</sup>ROGRESS factor experienced differently or to a different degree (e.g., higher or lower socioeconomic status, higher or lower literacy level) or the absence of a P<sup>2</sup>ROGRESS factor (e.g., non-refugee; no pre-existing disease).</li> <li>ii) None (in some circumstances such as pregnancy and immunocompromised)</li> </ol>                                                                                                                                                                                                                                                                                                                                                                                                                                                                                                                                                                                                                                                    | Not applicable                                                                                                                                                                                                                                                                             |
| <b>Outcomes</b>                 | <p>Primary outcomes<sup>3</sup></p> <ul style="list-style-type: none"> <li>- Hospitalization rate (including readmissions)</li> <li>- Hospital length of stay (binary or continuous)</li> <li>- Admission to ICU</li> <li>- ICU length of stay (binary or continuous)</li> <li>- Need for mechanical ventilation</li> <li>- Case fatality</li> <li>- All-cause fatality</li> <li>- Severe or critical infection (composite; as defined by authors)</li> </ul> <p><sup>3</sup>Data may be extracted for outcomes listed above for the following population denominators, in order of priority:</p> <ol style="list-style-type: none"> <li>i) General population</li> <li>ii) Population positive for COVID-19</li> <li>iii) Population hospitalized for COVID-19</li> <li>iv) Population with a risk factor</li> </ol>                                                                                                                                                                                                                                                                             | <p>COVID-19 infection requiring outpatient treatment (e.g., treatment at primary care office, attendance at ED)</p> <p>Hospitalization for an illness other than COVID-19 infection</p> <p>Outcomes post-hospital discharge (e.g., readmissions unrelated to index COVID-19 infection)</p> |
| <b>Timing</b>                   | Any follow-up duration                                                                                                                                                                                                                                                                                                                                                                                                                                                                                                                                                                                                                                                                                                                                                                                                                                                                                                                                                                                                                                                                            | Not applicable                                                                                                                                                                                                                                                                             |

| Criterion    | Include                                                                                                                                                                | Exclude                               |
|--------------|------------------------------------------------------------------------------------------------------------------------------------------------------------------------|---------------------------------------|
| Setting      | OECD countries ( <a href="https://www.oecd.org/about/document/list-oecd-member-countries.htm">https://www.oecd.org/about/document/list-oecd-member-countries.htm</a> ) | Non-OECD countries                    |
| Study design | Prospective and retrospective cohort studies                                                                                                                           | Studies of interventions/treatments   |
| Language     | Full text in English or French; pre-prints if accepted for publication in a peer-reviewed journal.                                                                     | Language other than English or French |

COVID-19: novel coronavirus 2019; ED: emergency department; ICU: intensive care unit; MERS: Middle East Respiratory Syndrome; MV: mechanical ventilation; OECD: Organisation for Economic Co-operation and Development; SARS: severe acute respiratory syndrome

For peer review only

### Supplement 3. Excluded studies

#### Excluded – case series (n=87)

1. Akdur A, Karakaya E, Ayvazoglu Soy EH, Alshalabi O, Kirnap M, Arslan H, et al. Coronavirus Disease (COVID-19) in Kidney and Liver Transplant Patients: A Single-Center Experience. *Exp Clin Transplant*. 2020;18(3):270-4.
2. Albalate M, Arribas P, Torres E, Cintra M, Alcazar R, Puerta M, et al. High prevalence of asymptomatic COVID-19 in haemodialysis: learning day by day in the first month of the COVID-19 pandemic. *Alta prevalencia de COVID-19 asintomatico en hemodialisis Aprendiendo dia a dia el primer mes de pandemia de COVID-19*. 2020.
3. Alberici F, Delbarba E, Manenti C, Econimo L, Valerio F, Pola A, et al. A report from the Brescia Renal COVID Task Force on the clinical characteristics and short-term outcome of hemodialysis patients with SARS-CoV-2 infection. *Kidney international*. 2020.
4. Alberici F, Delbarba E, Manenti C, Econimo L, Valerio F, Pola A, et al. A single center observational study of the clinical characteristics and short-term outcome of 20 kidney transplant patients admitted for SARS-CoV2 pneumonia. *Kidney international*. 2020;97(6):1083-8.
5. Aries JA, Davies JK, Auer RL, Hallam SL, Montoto S, Smith M, et al. Clinical outcome of coronavirus disease 2019 in haemato-oncology patients. *British journal of haematology*. 2020.
6. Arslan H, Musabak U, Ayvazoglu Soy EH, Kurt Azap O, Sayin B, Akcay S, et al. Incidence and Immunologic Analysis of Coronavirus Disease (COVID-19) in Hemodialysis Patients: A Single-Center Experience. *Experimental and clinical transplantation : official journal of the Middle East Society for Organ Transplantation*. 2020;18(3):275-83.
7. Bezzio C, Saibeni S, Variola A, Allocca M, Massari A, Gerardi V, et al. Outcomes of COVID-19 in 79 patients with IBD in Italy: an IG-IBD study. *Gut*. 2020;69(7):1213-7.
8. Biagi A, Rossi L, Malagoli A, Zanni A, Sticozzi C, Comastri G, et al. Clinical and epidemiological characteristics of 320 deceased patients with COVID-19 in an Italian Province: A retrospective observational study. *J Med Virol*. 2020.
9. Bode B, Garrett V, Messler J, McFarland R, Crowe J, Booth R, et al. Glycemic Characteristics and Clinical Outcomes of COVID-19 Patients Hospitalized in the United States. *Journal of diabetes science and technology*. 2020:1932296820924469.
10. Breazzano MP, Shen J, Abdelhakim AH, Dagi Glass L, Horowitz J, Xie SX, et al. New York City COVID-19 resident physician exposure during exponential phase of pandemic. *The Journal of clinical investigation*. 2020.
11. Breazzano MP, Shen J, Abdelhakim AH, Glass LRD, Horowitz JD, Xie SX, et al. Resident physician exposure to novel coronavirus (2019-nCoV, SARS-CoV-2) within New York City during exponential phase of COVID-19 pandemic: Report of the New York City Residency Program Directors COVID-19 Research Group. *medRxiv : the preprint server for health sciences*. 2020.

12. Brenner EJ, Ungaro RC, Gearry RB, Kaplan GG, Kissous-Hunt M, Lewis JD, et al. Corticosteroids, but not TNF Antagonists, are Associated with Adverse COVID-19 Outcomes in Patients With Inflammatory Bowel Diseases: Results from an International Registry. *Gastroenterology*. 2020.
13. Cariou B, Hadjadj S, Wargny M, Pichelin M, Al-Salameh A, Allix I, et al. Phenotypic characteristics and prognosis of inpatients with COVID-19 and diabetes: the CORONADO study. *Diabetologia*. 2020.
14. Caron B, Arondel Y, Reimund J-M. Covid-19 and inflammatory bowel disease: questions on incidence, severity, and impact of treatment? *Clinical gastroenterology and hepatology : the official clinical practice journal of the American Gastroenterological Association*. 2020.
15. Chao JY, Derespina KR, Herold BC, Goldman DL, Aldrich M, Weingarten J, et al. Clinical Characteristics and Outcomes of Hospitalized and Critically Ill Children and Adolescents with Coronavirus Disease 2019 (COVID-19) at a Tertiary Care Medical Center in New York City. *The Journal of pediatrics*. 2020.
16. Columbia University Kidney Transplant P. Early Description of Coronavirus 2019 Disease in Kidney Transplant Recipients in New York. *Journal of the American Society of Nephrology : JASN*. 2020;31(6):1150-6.
17. Cook G, John Ashcroft A, Pratt G, Popat R, Ramasamy K, Kaiser M, et al. Real-world assessment of the clinical impact of symptomatic infection with severe acute respiratory syndrome coronavirus (COVID-19 disease) in patients with multiple myeloma receiving systemic anti-cancer therapy. *British journal of haematology*. 2020.
18. Crespo M, Pérez-Sáez MJ, Redondo-Pachón D, Llinàs-Mallol L, Montero MM, Villar-García J, et al. COVID-19 in elderly kidney transplant recipients. *Am J Transplant*. 2020.
19. de Marinis F, Attili I, Morganti S, Stati V, Spitaleri G, Gianoncelli L, et al. Results of Multilevel Containment Measures to Better Protect Lung Cancer Patients From COVID-19: The IEO Model. *Frontiers in oncology*. 2020;10:665.
20. de Rojas T, Perez-Martinez A, Cela E, Baragano M, Galan V, Mata C, et al. COVID-19 infection in children and adolescents with cancer in Madrid. *Pediatric blood & cancer*. 2020;67(7):e28397.
21. Edler C, Schroder AS, Aepfelbacher M, Fitzek A, Heinemann A, Heinrich F, et al. Dying with SARS-CoV-2 infection-an autopsy study of the first consecutive 80 cases in Hamburg, Germany. *International journal of legal medicine*. 2020.
22. Egol KA, Konda SR, Bird ML, Dedhia N, Landes EK, Ranson RA, et al. Increased Mortality and Major Complications in Hip Fracture Care During the COVID-19 Pandemic: A New York City Perspective. *Journal of orthopaedic trauma*. 2020.
23. Emmi G, Bettiol A, Mattioli I, Silvestri E, Di Scala G, Urban ML, et al. SARS-CoV-2 infection among patients with systemic autoimmune diseases. *Autoimmun Rev*. 2020;19(7):102575.

- 1  
2  
3 24. Fattizzo B, Giannotta JA, Sciume M, Cattaneo D, Bucelli C, Fracchiolla NS, et al. Reply  
4 to "COVID-19 in persons with haematological cancers": a focus on myeloid neoplasms and risk  
5 factors for mortality. *Leukemia*. 2020.  
6
- 7 25. Felice C, Nardin C, Di Tanna GL, Grossi U, Bernardi E, Scaldaferrì L, et al. Use of RAAS  
8 inhibitors and risk of clinical deterioration in COVID-19: results from an Italian cohort of 133  
9 hypertensives. *American journal of hypertension*. 2020.  
10
- 11 26. Fox SE, Akmatbekov A, Harbert JL, Li G, Quincy Brown J, Vander Heide RS. Pulmonary  
12 and cardiac pathology in African American patients with COVID-19: an autopsy series from New  
13 Orleans. *Lancet Respir Med*. 2020.  
14
- 15 27. Fung M, Chiu CY, DeVoe C, Doernberg SB, Schwartz BS, Langelier C, et al. Clinical  
16 Outcomes and Serologic Response in Solid Organ Transplant Recipients with COVID-19: A  
17 Case Series from the United States. *American journal of transplantation : official journal of the*  
18 *American Society of Transplantation and the American Society of Transplant Surgeons*. 2020.  
19
- 20 28. Gervasoni C, Meraviglia P, Riva A, Giacomelli A, Oreni L, Minisci D, et al. Clinical  
21 features and outcomes of HIV patients with coronavirus disease 2019. *Clinical infectious*  
22 *diseases : an official publication of the Infectious Diseases Society of America*. 2020.  
23
- 24 29. Gianfrancesco M, Hyrich KL, Al-Adely S, Carmona L, Danila MI, Gossec L, et al.  
25 Characteristics associated with hospitalisation for COVID-19 in people with rheumatic disease:  
26 data from the COVID-19 Global Rheumatology Alliance physician-reported registry. *Annals of*  
27 *the rheumatic diseases*. 2020.  
28
- 29 30. Gisondi P, Facheris P, Dapavo P, Piaserico S, Conti A, Naldi L, et al. The impact of the  
30 COVID-19 pandemic on patients with chronic plaque psoriasis being treated with biological  
31 therapy: the Northern Italy experience. *The British journal of dermatology*. 2020.  
32
- 33 31. Goicoechea M, Sánchez Cámara LA, Macías N, Muñoz de Morales A, Rojas Á G,  
34 Bascañana A, et al. COVID-19: clinical course and outcomes of 36 hemodialysis patients in  
35 Spain. *Kidney Int*. 2020;98(1):27-34.  
36
- 37 32. Goldfarb IT, Clapp MA, Soffer MD, Shook LL, Rushfirth K, Edlow AG, et al. Prevalence  
38 and Severity of Coronavirus Disease 2019 (COVID-19) Illness in Symptomatic Pregnant and  
39 Postpartum Women Stratified by Hispanic Ethnicity. *Obstetrics and gynecology*. 2020.  
40
- 41 33. Gubatan J, Levitte S, Patel A, Balabanis T, Sharma A, Jones E, et al. Prevalence, risk  
42 factors and clinical outcomes of COVID-19 in patients with a history of pancreatitis in Northern  
43 California. *Gut*. 2020.  
44
- 45 34. Hirshberg A, Kern-Goldberger AR, Levine LD, Pierce-Williams R, Short WR, Parry S, et  
46 al. Care of critically ill pregnant patients with COVID-19: a case series. *American journal of*  
47 *obstetrics and gynecology*. 2020.  
48
- 49 35. Husain SA, Dube G, Morris H, Fernandez H, Chang J-H, Paget K, et al. Early Outcomes  
50 of Outpatient Management of Kidney Transplant Recipients with Coronavirus Disease 2019.  
51 *Clinical journal of the American Society of Nephrology : CJASN*. 2020.  
52
- 53 36. Iavarone M, D'Ambrosio R, Soria A, Triolo M, Pugliese N, Del Poggio P, et al. High rates  
54 of 30-day mortality in patients with cirrhosis and COVID-19. *Journal of hepatology*. 2020.  
55  
56  
57  
58  
59  
60



- 1  
2  
3 37. Jung HY, Lim JH, Kang SH, Kim SG, Lee YH, Lee J, et al. Outcomes of COVID-19  
4 among Patients on In-Center Hemodialysis: An Experience from the Epicenter in South Korea. *J*  
5 *Clin Med*. 2020;9(6).  
6
- 7 38. Khera R, Clark C, Lu Y, Guo Y, Ren S, Truax B, et al. Association of Angiotensin-  
8 Converting Enzyme Inhibitors and Angiotensin Receptor Blockers with the Risk of  
9 Hospitalization and Death in Hypertensive Patients with Coronavirus Disease-19. *medRxiv* : the  
10 preprint server for health sciences. 2020.  
11
- 12 39. Knight M, Bunch K, Vousden N, Morris E, Simpson N, Gale C, et al. Characteristics and  
13 outcomes of pregnant women admitted to hospital with confirmed SARS-CoV-2 infection in UK:  
14 national population based cohort study. *BMJ (Clinical research ed)*. 2020;369:m2107.  
15
- 16 40. Kuderer NM, Choueiri TK, Shah DP, Shyr Y, Rubinstein SM, Rivera DR, et al. Clinical  
17 impact of COVID-19 on patients with cancer (CCC19): a cohort study. *Lancet (London,*  
18 *England)*. 2020.  
19
- 20 41. Kutlu Ö, Metin A. Dermatological diseases presented before COVID-19: Are patients  
21 with psoriasis and superficial fungal infections more vulnerable to the COVID-19? *Dermatol*  
22 *Ther*. 2020:e13509.  
23
- 24 42. LeBrun DG, Konnaris MA, Ghahramani GC, Premkumar A, DeFrancesco CJ, Gruskay  
25 JA, et al. Hip Fracture Outcomes During the COVID-19 Pandemic: Early Results from New  
26 York. *Journal of orthopaedic trauma*. 2020.  
27
- 28 43. Lee LYW, Cazier JB, Starkey T, Turnbull CD, Team UKCCMP, Kerr R, et al. COVID-19  
29 mortality in patients with cancer on chemotherapy or other anticancer treatments: a prospective  
30 cohort study. *Lancet (London, England)*. 2020.  
31
- 32 44. Lescure FX, Bouadma L, Nguyen D, Parisey M, Wicky PH, Behillil S, et al. Clinical and  
33 virological data of the first cases of COVID-19 in Europe: a case series. *The Lancet Infectious*  
34 *diseases*. 2020;20(6):697-706.  
35
- 36 45. Lim J-H, Park S-H, Jeon Y, Cho J-H, Jung H-Y, Choi J-Y, et al. Fatal Outcomes of  
37 COVID-19 in Patients with Severe Acute Kidney Injury. *Journal of clinical medicine*. 2020;9(6).  
38
- 39 46. Mannheim J, Gretsch S, Layden JE, Fricchione MJ. Characteristics of Hospitalized  
40 Pediatric COVID-19 Cases - Chicago, Illinois, March - April 2020. *Journal of the Pediatric*  
41 *Infectious Diseases Society*. 2020.  
42
- 43 47. Marcault C, Fodil S, Dupont T, Darmon M, Azoulay E. In response to the letter of  
44 Montagud-Marrahi et al. *American journal of transplantation* : official journal of the American  
45 *Society of Transplantation and the American Society of Transplant Surgeons*. 2020.  
46
- 47 48. Martin-Moro F, Marquet J, Piris M, Michael BM, Saez AJ, Corona M, et al. Survival study  
48 of hospitalised patients with concurrent COVID-19 and haematological malignancies. *British*  
49 *journal of haematology*. 2020.  
50
- 51 49. Martinez-Perez O, Vouga M, Cruz Melguizo S, Forcen Acebal L, Panchaud A, Munoz-  
52 Chapuli M, et al. Association Between Mode of Delivery Among Pregnant Women With COVID-  
53 19 and Maternal and Neonatal Outcomes in Spain. *JAMA*. 2020.  
54  
55  
56  
57  
58  
59  
60

- 1  
2  
3 50. Mathian A, Amoura Z. Response to: Correspondence regarding research letter to the  
4 editor by Mathian et al, 'Clinical course of coronavirus disease 2019 (COVID-19) in a series of  
5 17 patients with systemic lupus under long-term treatment with hydroxychloroquine" by Nikpour  
6 et al. *Annals of the rheumatic diseases*. 2020.  
7
- 8 51. Mathian A, Mahevas M, Rohmer J, Roumier M, Cohen-Aubart F, Amador-Borrero B, et  
9 al. Clinical course of coronavirus disease 2019 (COVID-19) in a series of 17 patients with  
10 systemic lupus erythematosus under long-term treatment with hydroxychloroquine. *Annals of*  
11 *the rheumatic diseases*. 2020;79(6):837-9.  
12
- 13 52. Matsuo K, Novatt H, Matsuzaki S, Hom MS, Castaneda AV, Licon E, et al. Wait-time for  
14 hysterectomy and survival of women with early-stage cervical cancer: A clinical implication  
15 during the coronavirus pandemic. *Gynecol Oncol*. 2020;158(1):37-43.  
16
- 17 53. Mehta V, Goel S, Kabarriti R, Cole D, Goldfinger M, Acuna-Villaorduna A, et al. Case  
18 Fatality Rate of Cancer Patients with COVID-19 in a New York Hospital System. *Cancer*  
19 *discovery*. 2020.  
20
- 21 54. Meloni M, Izzo V, Giurato L, Gandini R, Uccioli L. Management of diabetic persons with  
22 foot ulceration during COVID-19 health care emergency: Effectiveness of a new triage pathway.  
23 *Diabetes research and clinical practice*. 2020;165:108245.  
24
- 25 55. Mendoza M, Garcia-Ruiz I, Maiz N, Rodo C, Garcia-Manau P, Serrano B, et al. Pre-  
26 eclampsia-like syndrome induced by severe COVID-19: a prospective observational study. *Bjog*.  
27 2020.  
28
- 29 56. Menter T, Haslbauer JD, Nienhold R, Savic S, Deigendesch H, Frank S, et al.  
30 Postmortem examination of COVID-19 patients reveals diffuse alveolar damage with severe  
31 capillary congestion and variegated findings in lungs and other organs suggesting vascular  
32 dysfunction. *Histopathology*. 2020.  
33
- 34 57. Michelle L, Meredith A, Rebecca C-S, Jun L, John L, Samuel S, et al. Kidney Allograft  
35 Recipients Diagnosed with Coronavirus Disease-2019: A Single Center Report. *medRxiv*. 2020.  
36
- 37 58. Munoz Vives JM, Jornet-Gibert M, Camara-Cabrera J, Esteban PL, Brunet L, Delgado-  
38 Flores L, et al. Mortality Rates of Patients with Proximal Femoral Fracture in a Worldwide  
39 Pandemic: Preliminary Results of the Spanish HIP-COVID Observational Study. *The Journal of*  
40 *bone and joint surgery American volume*. 2020.  
41
- 42 59. Parri N, Magista AM, Marchetti F, Cantoni B, Arrighini A, Romanengo M, et al.  
43 Characteristic of COVID-19 infection in pediatric patients: early findings from two Italian  
44 Pediatric Research Networks. *European journal of pediatrics*. 2020.  
45
- 46 60. Pereira A, Cruz-Melguizo S, Adrien M, Fuentes L, Marin E, Perez-Medina T. Clinical  
47 course of coronavirus disease-2019 in pregnancy. *Acta obstetrica et gynecologica*  
48 *Scandinavica*. 2020.  
49
- 50 61. Pereira MR, Mohan S, Cohen DJ, Husain SA, Dube GK, Ratner LE, et al. COVID-19 in  
51 solid organ transplant recipients: Initial report from the US epicenter. *American journal of*  
52 *transplantation : official journal of the American Society of Transplantation and the American*  
53 *Society of Transplant Surgeons*. 2020.  
54  
55  
56  
57  
58  
59  
60

- 1  
2  
3 62. Pierce-Williams RAM, Burd J, Felder L, Khoury R, Bernstein PS, Avila K, et al. Clinical  
4 course of severe and critical COVID-19 in hospitalized pregnancies: a US cohort study.  
5 American journal of obstetrics & gynecology MFM. 2020:100134.  
6
- 7 63. Quartuccio L, Valent F, Pasut E, Tascini C, De Vita S. Prevalence of COVID-19 among  
8 patients with chronic inflammatory rheumatic diseases treated with biologic agents or small  
9 molecules: A population-based study in the first two months of COVID-19 outbreak in Italy. Joint  
10 Bone Spine. 2020.  
11
- 12 64. Razanamahery J, Soumagne T, Humbert S, Brunel AS, Lepiller Q, Daguindau E, et al.  
13 Does type of immunosuppression influence the course of Covid-19 infection? The Journal of  
14 infection. 2020.  
15
- 16 65. Robilotti EV, Babady NE, Mead PA, Rolling T, Perez-Johnston R, Bernardes M, et al.  
17 Determinants of Severity in Cancer Patients with COVID-19 Illness. medRxiv : the preprint  
18 server for health sciences. 2020.  
19
- 20 66. Rodriguez-Lago I, Ramirez de la Piscina P, Elorza A, Merino O, Ortiz de Zarate J,  
21 Cabriada JL. Characteristics and prognosis of patients with inflammatory bowel disease during  
22 the SARS-CoV-2 pandemic in the Basque Country (Spain). Gastroenterology. 2020.  
23
- 24 67. Sabatino J, Ferrero P, Chessa M, Bianco F, Ciliberti P, Secinaro A, et al. COVID-19 and  
25 Congenital Heart Disease: Results from a Nationwide Survey. Journal of clinical medicine.  
26 2020;9(6).  
27
- 28 68. Safavi F, Nourbakhsh B, Azimi AR. B-cell depleting therapies may affect susceptibility to  
29 acute respiratory illness among patients with multiple sclerosis during the early COVID-19  
30 epidemic in Iran. Mult Scler Relat Disord. 2020;43:102195.  
31
- 32 69. Sanchez-Piedra C, Diaz-Torne C, Manero J, Pego-Reigosa JM, Rua-Figueroa I,  
33 Gonzalez-Gay MA, et al. Clinical features and outcomes of COVID-19 in patients with rheumatic  
34 diseases treated with biological and synthetic targeted therapies. Annals of the rheumatic  
35 diseases. 2020.  
36
- 37 70. Shabto JM, Loerinc L, O'Keefe GA, O'Keefe J. Characteristics and outcomes of COVID-  
38 19 positive patients with diabetes managed as outpatients. Diabetes research and clinical  
39 practice. 2020;164:108229.  
40
- 41 71. Shalev N, Scherer M, LaSota ED, Antoniou P, Yin MT, Zucker J, et al. Clinical  
42 characteristics and outcomes in people living with HIV hospitalized for COVID-19. Clinical  
43 infectious diseases : an official publication of the Infectious Diseases Society of America. 2020.  
44
- 45 72. Stochino C, Villa S, Zucchi P, Parravicini P, Gori A, Raviglione MC. Clinical  
46 characteristics of COVID-19 and active tuberculosis co-infection in an Italian reference hospital.  
47 The European respiratory journal. 2020.  
48
- 49 73. Tanu S, Sourabh P, Sunil P, Amit R. Hyperpyrexia leading to death in a patient with  
50 severe COVID-19 disease. medRxiv. 2020.  
51
- 52 74. Team C-I. Clinical and virologic characteristics of the first 12 patients with coronavirus  
53 disease 2019 (COVID-19) in the United States. Nature medicine. 2020.  
54  
55  
56  
57  
58  
59  
60

- 1  
2  
3 75. Tejada Meza H, Lambea A, Sancho Saldana A, Martinez-Zabaleta MT, de la Riva P, Lopez-Cancio E, et al. EXPRESS: Impact of COVID-19 outbreak in ischemic stroke admissions and in-hospital mortality in North-West Spain. *International journal of stroke : official journal of the International Stroke Society*. 2020:1747493020938301.
- 4  
5  
6  
7  
8 76. Topaktaş R, Tokuç E, Ali Kutluhan M, Akyüz M, Karabay E, Çalışkan S. Clinical features and outcomes of COVID-19 patients with benign prostatic hyperplasia in ageing male: A retrospective study of 18 cases. *Int J Clin Pract*. 2020:e13574.
- 9  
10  
11  
12 77. Topaktas R, Tokuc E, Kutluhan MA, Akyuz M, Karabay E, Caliskan S. Clinical features and outcomes of COVID-19 patients with benign prostatic hyperplasia in aging male: A retrospective study of 18 cases. *International journal of clinical practice*. 2020:e13574.
- 13  
14  
15  
16 78. Travi G, Rossotti R, Merli M, Sacco A, Perricone G, Lauterio A, et al. Clinical outcome in solid organ transplant recipients with COVID-19: A single-center experience. *American journal of transplantation : official journal of the American Society of Transplantation and the American Society of Transplant Surgeons*. 2020.
- 17  
18  
19  
20 79. Trujillo H, Caravaca-Fontan F, Sevillano A, Gutierrez E, Caro J, Gutierrez E, et al. SARS-CoV-2 Infection in Hospitalized Patients with Kidney Disease. *Kidney international reports*. 2020.
- 21  
22  
23  
24 80. Valeri AM, Robbins-Juarez SY, Stevens JS, Ahn W, Rao MK, Radhakrishnan J, et al. Presentation and Outcomes of Patients with ESKD and COVID-19. *Journal of the American Society of Nephrology : JASN*. 2020.
- 25  
26  
27  
28 81. Verdoni L, Mazza A, Gervasoni A, Martelli L, Ruggeri M, Ciuffreda M, et al. An outbreak of severe Kawasaki-like disease at the Italian epicentre of the SARS-CoV-2 epidemic: an observational cohort study. *Lancet*. 2020;395(10239):1771-8.
- 29  
30  
31  
32 82. Vizcarra P, Perez-Elias MJ, Quereda C, Moreno A, Vivancos MJ, Dronda F, et al. Description of COVID-19 in HIV-infected individuals: a single-centre, prospective cohort. *The lancet HIV*. 2020.
- 33  
34  
35  
36 83. Webb GJ, Moon AM, Barnes E, Barritt AS, Marjot T. Determining risk factors for mortality in liver transplant patients with COVID-19. *The lancet Gastroenterology & hepatology*. 2020.
- 37  
38  
39  
40 84. Whittaker E, Bamford A, Kenny J, Kaforou M, Jones CE, Shah P, et al. Clinical Characteristics of 58 Children With a Pediatric Inflammatory Multisystem Syndrome Temporally Associated With SARS-CoV-2. *JAMA*. 2020.
- 41  
42  
43  
44 85. Yaghi S, Ishida K, Torres J, Mac Grory B, Raz E, Humbert K, et al. SARS-CoV-2 and Stroke in a New York Healthcare System. *Stroke*. 2020;51(7):2002-11.
- 45  
46  
47  
48 86. Yamada T, Mikami T, Chopra N, Miyashita H, Chernyavsky S, Miyashita S. Patients with chronic kidney disease have a poorer prognosis of coronavirus disease 2019 (COVID-19): an experience in New York City. *International urology and nephrology*. 2020.
- 49  
50  
51  
52 87. Zen M, Fuzzi E, Astorri D, Saccon F, Padoan R, Ienna L, et al. SARS-CoV-2 infection in patients with autoimmune rheumatic diseases in northeast Italy: A cross-sectional study on 916 patients. *Journal of autoimmunity*. 2020:102502.
- 53  
54  
55  
56  
57  
58  
59  
60

**Excluded – country (n=240)**

1. Collaborative C. Mortality and pulmonary complications in patients undergoing surgery with perioperative SARS-CoV-2 infection: an international cohort study. *Lancet* (London, England). 2020.
2. Du H, Dong X, Zhang J-J, Cao Y-Y, Akdis M, Huang P-Q, et al. Clinical characteristics of 182 pediatric COVID-19 patients with different severities and allergic status. *Allergy*. 2020.
3. Fan J, Wang H, Ye G, Cao X, Xu X, Tan W, et al. Letter to the Editor: Low-density lipoprotein is a potential predictor of poor prognosis in patients with coronavirus disease 2019. *Metabolism: clinical and experimental*. 2020;107:154243.
4. Gao F, Zheng KI, Wang X-B, Sun Q-F, Pan K-H, Wang T-Y, et al. Obesity Is a Risk Factor for Greater COVID-19 Severity. *Diabetes care*. 2020.
5. Gao F, Zheng KI, Wang X-B, Yan H-D, Sun Q-F, Pan K-H, et al. Metabolic associated fatty liver disease increases coronavirus disease 2019 disease severity in nondiabetic patients. *Journal of gastroenterology and hepatology*. 2020.
6. Henry BM, de Oliveira MHS, Benoit S, Plebani M, Lippi G. Hematologic, biochemical and immune biomarker abnormalities associated with severe illness and mortality in coronavirus disease 2019 (COVID-19): a meta-analysis. *Clinical chemistry and laboratory medicine*. 2020.
7. Lagunas-Rangel FA. Neutrophil-to-lymphocyte ratio and lymphocyte-to-C-reactive protein ratio in patients with severe coronavirus disease 2019 (COVID-19): A meta-analysis. *Journal of medical virology*. 2020.
8. Lopic I, Rogic D, Plebani M. Erythrocyte sedimentation rate is associated with severe coronavirus disease 2019 (COVID-19): a pooled analysis. *Clinical chemistry and laboratory medicine*. 2020.
9. Lechien JR, Bartaire E, Bobin F, Hans S, Saussez S. The association between laryngopharyngeal reflux and COVID-19 is still not demonstrated. *Journal of medical virology*. 2020.
10. Leiva Sisniegues CE, Espeche WG, Salazar MR. Arterial hypertension and the risk of severity and mortality of COVID-19. *The European respiratory journal*. 2020;55(6).
11. Lippi G, de Oliveira MHS, Henry BM. Chronic liver disease is not associated with severity or mortality in Coronavirus disease 2019 (COVID-19): a pooled analysis. *European journal of gastroenterology & hepatology*. 2020.
12. Lippi G, Lavie CJ, Sanchis-Gomar F. Cardiac troponin I in patients with coronavirus disease 2019 (COVID-19): Evidence from a meta-analysis. *Progress in cardiovascular diseases*. 2020.
13. Lippi G, Mattiuzzi C, Sanchis-Gomar F, Henry BM. Clinical and demographic characteristics of patients dying from COVID-19 in Italy vs China. *Journal of medical virology*. 2020.

14. Liu X, Zhou H, Zhou Y, Wu X, Zhao Y, Lu Y, et al. Risk factors associated with disease severity and length of hospital stay in COVID-19 patients. *The Journal of infection*. 2020.
15. Marlais M, Wlodkowski T, Vivarelli M, Pape L, Tonshoff B, Schaefer F, et al. The severity of COVID-19 in children on immunosuppressive medication. *The Lancet Child & adolescent health*. 2020.
16. McQuaid CF, McCreesh N, Read JM, Sumner T, Houben RMGJ, White RG, et al. The potential impact of COVID-19-related disruption on tuberculosis burden. *The European respiratory journal*. 2020.
17. Mi B, Chen L, Panayi AC, Xiong Y, Liu G. Surgery in the COVID-19 pandemic: clinical characteristics and outcomes. *The British journal of surgery*. 2020.
18. Ong SWX, Young BE, Leo Y-S, Lye DC. Association of higher body mass index (BMI) with severe coronavirus disease 2019 (COVID-19) in younger patients. *Clinical infectious diseases : an official publication of the Infectious Diseases Society of America*. 2020.
19. Peng S, Huang L, Zhao B, Zhou S, Braithwaite I, Zhang N, et al. Clinical course of coronavirus disease 2019 in 11 patients after thoracic surgery and challenges in diagnosis. *The Journal of thoracic and cardiovascular surgery*. 2020.
20. Qi X, Liu Y, Wang J, Fallowfield JA, Wang J, Li X, et al. Clinical course and risk factors for mortality of COVID-19 patients with pre-existing cirrhosis: a multicentre cohort study. *Gut*. 2020.
21. Qiancheng X, Jian S, Lingling P, Lei H, Xiaogan J, Weihua L, et al. Coronavirus disease 2019 in pregnancy. *International journal of infectious diseases : IJID : official publication of the International Society for Infectious Diseases*. 2020;95:376-83.
22. Roncon L, Zuin M, Rigatelli G, Zuliani G. Diabetic patients with COVID-19 infection are at higher risk of ICU admission and poor short-term outcome. *Journal of clinical virology : the official publication of the Pan American Society for Clinical Virology*. 2020;127:104354.
23. Santoso A, Pranata R, Wibowo A, Al-Farabi MJ, Huang I, Antariksa B. Cardiac injury is associated with mortality and critically ill pneumonia in COVID-19: A meta-analysis. *The American journal of emergency medicine*. 2020.
24. Su M, Peng J, Wu M, Deng W, Yang Y, Peng YG. Two consecutive myocardial tissue insults for inpatients with COVID-19. *Critical care (London, England)*. 2020;24(1):259.
25. Tadolini M, Codecasa LR, Garcia-Garcia J-M, Blanc F-X, Borisov S, Alffenaar J-W, et al. Active tuberculosis, sequelae and COVID-19 co-infection: first cohort of 49 cases. *The European respiratory journal*. 2020.
26. Tan N-D, Qiu Y, Xing X-B, Ghosh S, Chen M-H, Mao R. Associations between Angiotensin Converting Enzyme Inhibitors and Angiotensin II Receptor Blocker Use, Gastrointestinal Symptoms, and Mortality among Patients with COVID-19. *Gastroenterology*. 2020.

- 1  
2  
3 27. Targher G, Mantovani A, Byrne CD, Wang X-B, Yan H-D, Sun Q-F, et al. Risk of severe  
4 illness from COVID-19 in patients with metabolic dysfunction-associated fatty liver disease and  
5 increased fibrosis scores. *Gut*. 2020.
- 6  
7 28. Targher G, Mantovani A, Wang XB, Yan HD, Sun QF, Pan KH, et al. Patients with  
8 diabetes are at higher risk for severe illness from COVID-19. *Diabetes & metabolism*. 2020.
- 9  
10 29. Tian S, Liu H, Liao M, Wu Y, Yang C, Cai Y, et al. Analysis of Mortality in Patients With  
11 COVID-19: Clinical and Laboratory Parameters. *Open forum infectious diseases*.  
12 2020;7(5):ofaa152.
- 13  
14 30. Wei X, Zeng W, Su J, Wan H, Yu X, Cao X, et al. Hypolipidemia is associated with the  
15 severity of COVID-19. *Journal of clinical lipidology*. 2020;14(3):297-304.
- 16  
17 31. Xiong X-L, Wong KK-Y, Chi S-Q, Zhou A-F, Tang J-Q, Zhou L-S, et al. Comparative  
18 study of the clinical characteristics and epidemiological trend of 244 COVID-19 infected children  
19 with or without GI symptoms. *Gut*. 2020.
- 20  
21 32. Yao Q, Wang P, Wang X, Qie G, Meng M, Tong X, et al. A retrospective study of risk  
22 factors for severe acute respiratory syndrome coronavirus 2 infections in hospitalized adult  
23 patients. *Polish archives of internal medicine*. 2020;130(5):390-9.
- 24  
25 33. Zheng Z, Peng F, Xu B, Zhao J, Liu H, Peng J, et al. Risk factors of critical & mortal  
26 COVID-19 cases: A systematic literature review and meta-analysis. *The Journal of infection*.  
27 2020.
- 28  
29 34. Zhou Y-J, Zheng KI, Wang X-B, Yan H-D, Sun Q-F, Pan K-H, et al. Younger patients  
30 with MAFLD are at increased risk of severe COVID-19 illness: A multicenter preliminary  
31 analysis. *Journal of hepatology*. 2020.
- 32  
33 35. Zuin M, Rigatelli G, Zuliani G, Rigatelli A, Mazza A, Roncon L. Arterial hypertension and  
34 risk of death in patients with COVID-19 infection: Systematic review and meta-analysis. *The*  
35 *Journal of infection*. 2020.
- 36  
37 36. Screening and identification of peripheral blood biomarkers in patients with COVID-19  
38 infection based on multiomics studies. *Chinese Clinical Trial Registry*. 2020.
- 39  
40 37. Prognosis Investigation and Intervention Study on Patients with novel coronavirus  
41 pneumonia (COVID-19) in recovery period Based on Community Health Management. *Chinese*  
42 *Clinical Trial Registry*. 2020.
- 43  
44 38. A medical records based analysis for the clinical characteristics of novel coronavirus  
45 pneumonia (COVID-19) in immunocompromised patients. *Chinese Clinical Trial Registry*. 2020.
- 46  
47 39. Correlation analysis of blood eosinophil cell levels and clinical type category of novel  
48 coronavirus pneumonia (COVID-19): a medical records based retrospective study. *Chinese*  
49 *Clinical Trial Registry*. 2020.
- 50  
51 40. A medical records based study for epidemic and clinical features of novel coronavirus  
52 pneumonia (COVID-19) in Ningbo First Hospital. *Chinese Clinical Trial Registry*. 2020.
- 53  
54  
55  
56  
57  
58  
59  
60

- 1  
2  
3 41. Correlation of T lymphocytes level and clinical severity in novel coronavirus pneumonia  
4 (COVID-19) patients: a medical records based retrospective study. Chinese Clinical Trial  
5 Registry. 2020.  
6
- 7 42. A medical records based retrospective study for analysis clinical characteristics and risk  
8 factors of death in patients with novel coronavirus pneumonia (COVID-19). Chinese Clinical  
9 Trial Registry. 2020.  
10
- 11 43. A Medical Records Based Retrospective Study for Clinical Characteristics, Treatments  
12 and Prognosis of Patients with Novel Coronavirus Pneumonia (COVID-19) in WuHan. Chinese  
13 Clinical Trial Registry. 2020.  
14
- 15 44. A medical records based study for clinical characteristics of 2019 novel coronavirus  
16 pneumonia (COVID-19) in Zhejiang province, China. Chinese Clinical Trial Registry. 2020.  
17
- 18 45. Clinical and CT imaging Characteristics of novel coronavirus pneumonia (COVID-19): An  
19 Multicenter Cohort Study. Chinese Clinical Trial Registry. 2020.  
20
- 21 46. A medical records based study for clinical characteristics of novel coronavirus  
22 pneumonia (COVID-19). Chinese Clinical Trial Registry. 2020.  
23
- 24 47. A medical records based study for the value of Lymphocyte subsets in the diagnose and  
25 treatment of novel coronavirus pneumonia (COVID-19). Chinese Clinical Trial Registry. 2020.  
26
- 27 48. A medical records based analysis of the Incidence and Risk Factors of Ventilator-  
28 associated Pneumonia in ARDS Patients with Novel Coronavirus Pneumonia (COVID-19).  
29 Chinese Clinical Trial Registry. 2020.  
30
- 31 49. Correlation between virological negative conversion and clinical factors and prognosis in  
32 patients with novel coronavirus pneumonia (COVID-19). Chinese Clinical Trial Registry. 2020.  
33
- 34 50. Clinical characteristics and prognosis of cancer patients with novel coronavirus  
35 pneumonia (COVID-19). Chinese Clinical Trial Registry. 2020.  
36
- 37 51. Construction of Early Warning and Prediction System for Patients with Severe / Critical  
38 Novel Coronavirus Pneumonia (COVID-19). Chinese Clinical Trial Registry. 2020.  
39
- 40 52. Study for the physical and mental health status of medical workers under the novel  
41 coronavirus pneumonia (COVID-19) epidemic. Chinese Clinical Trial Registry. 2020.  
42
- 43 53. Construction of a Bio information platform for novel coronavirus pneumonia (COVID-19)  
44 patients follow-up in Anhui. Chinese Clinical Trial Registry. 2020.  
45
- 46 54. A Medical Records Based Retrospective Study for Clinical Characteristics of severe  
47 Novel Coronavirus Pneumonia (COVID-19). Chinese Clinical Trial Registry. 2020.  
48
- 49 55. Analysis of risk factors affecting prognosis of elderly patients infected with novel  
50 coronavirus pneumonia (COVID-19): a single-center retrospective observational study. Chinese  
51 Clinical Trial Registry. 2020.  
52
- 53 56. Factors associated with death in patients with novel coronavirus pneumonia (COVID-  
54 19). Chinese Clinical Trial Registry. 2020.  
55  
56  
57  
58  
59  
60



- 1
- 2
- 3
- 4 57. To explore the pathogenesis and course prediction of novel coronavirus pneumonia
- 5 (COVID-19) severe patients. Chinese Clinical Trial Registry. 2020.
- 6
- 7 58. A Medical Records Based analysis for Risk Factors for Outcomes After Respiratory
- 8 Support in Patients with ARDS Due to Novel Coronavirus Pneumonia (COVID-19). Chinese
- 9 Chinese Clinical Trial Registry. 2020.
- 10
- 11 59. A medical records based study for clinical characteristics and risk factors of novel
- 12 coronavirus pneumonia (COVID-19). Chinese Clinical Trial Registry. 2020.
- 13
- 14 60. Novel Coronavirus Infected Disease (COVID-19) in children: epidemiology, clinical
- 15 features and treatment outcome. Chinese Clinical Trial Registry. 2020.
- 16
- 17 61. A medical records based study for optimization and evaluation of the comprehensive
- 18 diagnosis and treatment of novel coronavirus pneumonia (COVID-19) and the assessment of
- 19 risk factors for severe pneumonia. Chinese Clinical Trial Registry. 2020.
- 20
- 21 62. A medical records based study for clinical features of novel coronavirus pneumonia
- 22 (COVID-19) patients and risk factors of death. Chinese Clinical Trial Registry. 2020.
- 23
- 24 63. A medical records based analysis for risk factors for death in patients with Novel
- 25 Coronavirus Pneumonia (COVID-19). Chinese Clinical Trial Registry. 2020.
- 26
- 27 64. Risk Factors for Outcomes of Novel Coronavirus Pneumonia (COVID-19). Chinese
- 28 Clinical Trial Registry. 2020.
- 29
- 30 65. Analysis of the incidence and risk factors of ARDS in patients with Novel Coronavirus
- 31 Pneumonia (COVID-19). Chinese Clinical Trial Registry. 2020.
- 32
- 33 66. The treatment status and risk factors related to prognosis of hospitalized patients with
- 34 novel coronavirus pneumonia (COVID-19) in intensive care unit, Hebei, China: a descriptive
- 35 study. Chinese Clinical Trial Registry. 2020.
- 36
- 37 67. Delineate the prevalence, risk factors, temporal distribution and epidemiological
- 38 characteristics of hidden novel coronavirus (2019-nCoV) infection in the community. Chinese
- 39 Clinical Trial Registry. 2020.
- 40
- 41 68. A correlation study between food intake and risk factors of PTSD after the COVID-19 of
- 42 shift medical staff. Chinese Clinical Trial Registry. 2020.
- 43
- 44 69. Clinical characteristics and risk factors of novel coronavirus pneumonia (COVID-19)
- 45 patients with chronic liver disease. Chinese Clinical Trial Registry. 2020.
- 46
- 47 70. Study for the risk factors of critically ill patients with novel coronavirus pneumonia
- 48 (COVID-19). Chinese Clinical Trial Registry. 2020.
- 49
- 50 71. Bai X. A medical records based retrospective analysis of maternal and infant outcomes
- 51 in Cesarean delivery in Hangzhou non pneumonia Hospital during pandemic of Novel
- 52 coronavirus pneumonia(COVID-19). Chinese Clinical Trial Registry. 2020.
- 53
- 54 72. Bai Y, Yao L, Wei T, Tian F, Jin DY, Chen L, et al. Presumed Asymptomatic Carrier
- 55 Transmission of COVID-19. JAMA. 2020;323(14):1406-7.
- 56
- 57
- 58
- 59
- 60

- 1  
2  
3 73. Beijing Children's H. Clinical Characteristics and Long-term Prognosis of 2019-nCoV  
4 Infection in Children. *clinicaltrials.gov*. 2020.  
5
- 6 74. Bo W, Jiangtao L, Shihua F, Xiaocheng X, Lanyu L, Yueling M, et al. An effect  
7 assessment of Airborne particulate matter pollution on COVID-19: A multi-city Study in China.  
8 *medRxiv*. 2020.  
9
- 10 75. Cai Q, Huang D, Ou P, Yu H, Zhu Z, Xia Z, et al. COVID-19 in a Designated Infectious  
11 Diseases Hospital Outside Hubei Province, China. *Allergy*. 2020.  
12
- 13 76. Cao C, Li Y, Liu S, Fan H, Hao L. Epidemiological Features of 135 Patients with  
14 Coronavirus Disease (COVID-19) in Tianjin, China. *Disaster medicine and public health*  
15 *preparedness*. 2020:1-9.  
16
- 17 77. Cao M, Zhang D, Wang Y, Lu Y, Zhu X, Li Y, et al. Clinical Features of Patients Infected  
18 with the 2019 Novel Coronavirus (COVID-19) in Shanghai, China. *medRxiv : the preprint server*  
19 *for health sciences*. 2020.  
20
- 21 78. Cao W, Fang Z, Hou G, Han M, Xu X, Dong J, et al. The psychological impact of the  
22 COVID-19 epidemic on college students in China. *Psychiatry research*. 2020;287:112934.  
23
- 24 79. Che Z, Jiaowei G, Quanjing C, Na D, Jingfeng L, Li H, et al. Clinical Characteristics of 34  
25 Children with Coronavirus Disease-2019 in the West of China: a Multiple-center Case Series.  
26 *medRxiv*. 2020.  
27
- 28 80. Chen H, Guo J, Wang C, Luo F, Yu X, Zhang W, et al. Clinical characteristics and  
29 intrauterine vertical transmission potential of COVID-19 infection in nine pregnant women: a  
30 retrospective review of medical records. *Lancet (London, England)*. 2020;395(10226):809-15.  
31
- 32 81. Chen J, Qi T, Liu L, Ling Y, Qian Z, Li T, et al. Clinical progression of patients with  
33 COVID-19 in Shanghai, China. *The Journal of infection*. 2020;80(5):e1-e6.  
34
- 35 82. Chen Ji, Hua F, Lin Z, Bin H, Muxin Z, Yong Z, et al. Retrospective Analysis of Clinical  
36 Features in 101 Death Cases with COVID-19. *medRxiv*. 2020.  
37
- 38 83. Chen L, Li Q, Zheng D, Jiang H, Wei Y, Zou L, et al. Clinical Characteristics of Pregnant  
39 Women with Covid-19 in Wuhan, China. *The New England journal of medicine*. 2020.  
40
- 41 84. Chen M, Fan Y, Wu X, Zhang L, Guo T, Deng K, et al. Clinical Characteristics And Risk  
42 Factors For Fatal Outcome in Patients With 2019-Coronavirus Infected Disease (COVID-19) in  
43 Wuhan, China. *SSRN*. 2020.  
44
- 45 85. Chen N, Zhou M, Dong X, Qu J, Gong F, Han Y, et al. Epidemiological and clinical  
46 characteristics of 99 cases of 2019 novel coronavirus pneumonia in Wuhan, China: a  
47 descriptive study. *Lancet (London, England)*. 2020;395(10223):507-13.  
48
- 49 86. Chen R, Liang W, Jiang M, Guan W, Zhan C, Wang T, et al. Risk factors of fatal  
50 outcome in hospitalized subjects with coronavirus disease 2019 from a nationwide analysis in  
51 China. *Chest*. 2020.  
52
- 53 87. Chen S, Huang B, Luo DJ, Li X, Yang F, Zhao Y, et al. [Pregnant women with new  
54 coronavirus infection: a clinical characteristics and placental pathological analysis of three  
55 cases]. *Zhonghua bing li xue za zhi = Chinese journal of pathology*. 2020;49(0):E005.  
56  
57  
58  
59  
60

- 1  
2  
3 88. Chen S, Liao E, Shao Y. Clinical analysis of pregnant women with 2019 novel  
4 coronavirus pneumonia. *Journal of medical virology*. 2020.  
5
- 6 89. Chen T, Dai Z, Mo P, Li X, Ma Z, Song S, et al. Clinical characteristics and outcomes of  
7 older patients with coronavirus disease 2019 (COVID-19) in Wuhan, China (2019): a single-  
8 centered, retrospective study. *The journals of gerontology Series A, Biological sciences and*  
9 *medical sciences*. 2020.  
10
- 11 90. Chen X, Zhao B, Qu Y, Chen Y, Xiong J, Feng Y, et al. Detectable serum SARS-CoV-2  
12 viral load (RNAemia) is closely correlated with drastically elevated interleukin 6 (IL-6) level in  
13 critically ill COVID-19 patients. *Clinical infectious diseases : an official publication of the*  
14 *Infectious Diseases Society of America*. 2020.  
15
- 16 91. Chen Y, Peng H, Wang L, Zhao Y, Zeng L, Gao H, et al. Infants Born to Mothers With a  
17 New Coronavirus (COVID-19). *Frontiers in pediatrics*. 2020;8:104.  
18
- 19 92. Cheng Y, Luo R, Wang K, Zhang M, Wang Z, Dong L, et al. Kidney disease is  
20 associated with in-hospital death of patients with COVID-19. *Kidney International*.  
21 2020;97(5):829-38.  
22
- 23 93. Chenyun L, Yun-zhi Y, Xiao Ming Z, Xinying X, Qing-Li D, Wen-Wu Z. The prevalence  
24 and influencing factors for anxiety in medical workers fighting COVID-19 in China: A cross-  
25 sectional survey. *medRxiv*. 2020.  
26
- 27 94. Chinese University of Hong K. Coronavirus Disease 2019 (COVID-19) Study of  
28 Hospitalized Patients in Hong Kong. *clinicaltrials.gov*. 2020.  
29
- 30 95. Chongqing Medical U. Prognostic Factors of Patients With COVID-19. *clinicaltrials.gov*.  
31 2020.  
32
- 33 96. Chu J, Yang N, Wei Y, Yue H, Zhang F, Zhao J, et al. Clinical Characteristics of 54  
34 medical staff with COVID-19: A retrospective study in a single center in Wuhan, China. *Journal*  
35 *of medical virology*. 2020;92(7):807-13.  
36
- 37 97. Deng Y, Liu W, Liu K, Fang YY, Shang J, Zhou L, et al. Clinical characteristics of fatal  
38 and recovered cases of coronavirus disease 2019 (COVID-19) in Wuhan, China: a retrospective  
39 study. *Chinese medical journal*. 2020.  
40
- 41 98. Dong XC, Li JM, Bai JY, Liu ZQ, Zhou PH, Gao L, et al. [Epidemiological characteristics  
42 of confirmed COVID-19 cases in Tianjin]. *Zhonghua liu xing bing xue za zhi = Zhonghua*  
43 *liuxingbingxue zazhi*. 2020;41(5):638-42.  
44
- 45 99. Du RH, Liu LM, Yin W, Wang W, Guan LL, Yuan ML, et al. Hospitalization and Critical  
46 Care of 109 Decedents with COVID-19 Pneumonia in Wuhan, China. *Annals of the American*  
47 *Thoracic Society*. 2020.  
48
- 49 100. Du Y, Tu L, Zhu P, Mu M, Wang R, Yang P, et al. Clinical Features of 85 Fatal Cases of  
50 COVID-19 from Wuhan: A Retrospective Observational Study. *American journal of respiratory*  
51 *and critical care medicine*. 2020;201(11):1372-9.  
52  
53  
54  
55  
56  
57  
58  
59

- 1  
2  
3 101. Fan C, Lei D, Fang C, Li C, Wang M, Liu Y, et al. Perinatal Transmission of COVID-19  
4 Associated SARS-CoV-2: Should We Worry? *Clinical infectious diseases : an official publication*  
5 *of the Infectious Diseases Society of America.* 2020.
- 6  
7 102. Fan Z, Deyan Y, Jing L, Peng G, Taibo C, Zhongwei C, et al. Myocardial injury is  
8 associated with in-hospital mortality of confirmed or suspected COVID-19 in Wuhan, China: A  
9 single center retrospective cohort study. *medRxiv.* 2020.
- 10  
11 103. Feng K, Yun YX, Wang XF, Yang GD, Zheng YJ, Lin CM, et al. [Analysis of CT features  
12 of 15 children with 2019 novel coronavirus infection]. *Zhonghua er ke za zhi = Chinese journal*  
13 *of pediatrics.* 2020;58(4):275-8.
- 14  
15 104. Feng Y, Ling Y, Bai T, Xie Y, Huang J, Li J, et al. COVID-19 with Different Severity: A  
16 Multi-center Study of Clinical Features. *American journal of respiratory and critical care*  
17 *medicine.* 2020;201(11):1380-8.
- 18  
19 105. Francisco C, Nuno F, Barbara O. Estimation of risk factors for COVID-19 mortality -  
20 preliminary results. *medRxiv.* 2020:2020.02.24.20027268.
- 21  
22 106. Gao L, Jiang D, Wen XS, Cheng XC, Sun M, He B, et al. Prognostic value of NT-proBNP  
23 in patients with severe COVID-19. *Respiratory research.* 2020;21(1):83.
- 24  
25 107. Gong J, Ou J, Qiu X, Jie Y, Chen Y, Yuan L, et al. A Tool to Early Predict Severe  
26 Corona Virus Disease 2019 (COVID-19) : A Multicenter Study using the Risk Nomogram in  
27 Wuhan and Guangdong, China. *Clinical infectious diseases : an official publication of the*  
28 *Infectious Diseases Society of America.* 2020.
- 29  
30 108. Guan WJ, Liang WH, Zhao Y, Liang HR, Chen ZS, Li YM, et al. Comorbidity and its  
31 impact on 1590 patients with Covid-19 in China: A Nationwide Analysis. *The European*  
32 *respiratory journal.* 2020;55(5).
- 33  
34 109. Guan WJ, Ni ZY, Hu Y, Liang WH, Ou CQ, He JX, et al. Clinical Characteristics of  
35 Coronavirus Disease 2019 in China. *The New England journal of medicine.* 2020;382(18):1708-  
36 20.
- 37  
38 110. Guang Y, Zihu T, Ling Z, Min Y, Lang P, Jinjin L, et al. Angiotensin II Receptor Blockers  
39 and Angiotensin-Converting Enzyme Inhibitors Usage is Associated with Improved Inflammatory  
40 Status and Clinical Outcomes in COVID-19 Patients With Hypertension. *medRxiv.* 2020.
- 41  
42 111. Guo W, Li M, Dong Y, Zhou H, Zhang Z, Tian C, et al. Diabetes is a risk factor for the  
43 progression and prognosis of COVID-19. *Diabetes/metabolism research and reviews.*  
44 2020:e3319.
- 45  
46 112. Han H, Xie L, Liu R, Yang J, Liu F, Wu K, et al. Analysis of heart injury laboratory  
47 parameters in 273 COVID-19 patients in one hospital in Wuhan, China. *Journal of medical*  
48 *virology.* 2020;92(7):819-23.
- 49  
50 113. Han M, Ma K, Wang X, Yan W, Wang H, You J, et al. Higher Fasting Plasma Glucose  
51 Reduced the Survival Rate of 306 Hospitalized Patients with COVID-19 in Wuhan, China.  
52 *SSRN.* 2020.
- 53  
54  
55  
56  
57  
58  
59  
60

- 1  
2  
3 114. Hantoushzadeh S, Shamsirsaz AA, Aleyasin A, Seferovic MD, Aski SK, Arian SE, et al. Maternal Death Due to COVID-19 Disease. *American journal of obstetrics and gynecology*. 2020.  
4  
5  
6  
7 115. Hu H, Yao N, Qiu Y. Comparing rapid scoring systems in mortality prediction of critical ill  
8 patients with novel coronavirus disease. *Academic emergency medicine : official journal of the*  
9 *Society for Academic Emergency Medicine*. 2020.  
10  
11 116. Hu L, Chen S, Fu Y, Gao Z, Long H, Wang JM, et al. Risk Factors Associated with  
12 Clinical Outcomes in 323 COVID-19 Hospitalized Patients in Wuhan, China. *Clinical infectious*  
13 *diseases : an official publication of the Infectious Diseases Society of America*. 2020.  
14  
15 117. Hu Z, Song C, Xu C, Jin G, Chen Y, Xu X, et al. Clinical characteristics of 24  
16 asymptomatic infections with COVID-19 screened among close contacts in Nanjing, China.  
17 *Science China Life sciences*. 2020;63(5):706-11.  
18  
19 118. Huadong Y, Ana MV, Amrita V, Shanbo W, Lili L, Shiqing Y, et al. Role of Drugs  
20 Affecting the Renin-Angiotensin-Aldosterone System on Susceptibility and Severity of COVID-  
21 19: A Large Case-Control Study from Zhejiang Province, China. *medRxiv*. 2020.  
22  
23 119. Huang C, Wang Y, Li X, Ren L, Zhao J, Hu Y, et al. Clinical features of patients infected  
24 with 2019 novel coronavirus in Wuhan, China. *Lancet (London, England)*.  
25 2020;395(10223):497-506.  
26  
27 120. Huang H, Shuijiang C, Yueping L, Youxia L, Yinqiang F, Linghua L, et al. Prognostic  
28 factors for COVID-19 pneumonia progression to severe symptom based on the earlier clinical  
29 features: a retrospective analysis. *medRxiv*. 2020.  
30  
31 121. Huang Y, Tu M, Wang S, Chen S, Zhou W, Chen D, et al. Clinical characteristics of  
32 laboratory confirmed positive cases of SARS-CoV-2 infection in Wuhan, China: A retrospective  
33 single center analysis. *Travel medicine and infectious disease*. 2020:101606.  
34  
35 122. Hui H, Yingqian Z, Xin Y, Xi W, Bingxi H, Li L, et al. Clinical and radiographic features of  
36 cardiac injury in patients with 2019 novel coronavirus pneumonia. *medRxiv*. 2020.  
37  
38 123. Jia-Kui S. Acute gastrointestinal injury in critically ill patients with coronavirus disease  
39 2019 in Wuhan, China. *medRxiv*. 2020.  
40  
41 124. Jianfeng X, Daniel H, Hui C, Simon TA, Shusheng L, Guozheng W, et al. Development  
42 and external validation of a prognostic multivariable model on admission for hospitalized  
43 patients with COVID-19. *medRxiv*. 2020:2020.03.28.20045997.  
44  
45 125. Jiatao L, Shufang H, Rong F, Zhihong L, Xueru Y, Qiongya W, et al. ACP risk grade: a  
46 simple mortality index for patients with confirmed or suspected severe acute respiratory  
47 syndrome coronavirus 2 disease (COVID-19) during the early stage of outbreak in Wuhan,  
48 China. *medRxiv*. 2020:2020.02.20.20025510.  
49  
50 126. Jie L, Liu O, Pi G, Hai sheng W, Peng F, Yu liang C, et al. Epidemiological, Clinical  
51 Characteristics and Outcome of Medical Staff Infected with COVID-19 in Wuhan, China: A  
52 Retrospective Case Series Analysis. *medRxiv*. 2020:2020.03.09.20033118.  
53  
54  
55  
56  
57  
58  
59  
60

- 1  
2  
3 127. Jie L, Shilin L, Yurui C, Qin L, Xue L, Zhaoping Z, et al. Epidemiological and Clinical  
4 Characteristics of 17 Hospitalized Patients with 2019 Novel Coronavirus Infections Outside  
5 Wuhan, China. medRxiv. 2020:2020.02.11.20022053.  
6
- 7 128. Jin XH, Zheng KI, Pan KH, Xie YP, Zheng MH. COVID-19 in a patient with chronic  
8 lymphocytic leukaemia. *The Lancet Haematology*. 2020;7(4):e351-e2.  
9
- 10 129. Jin-Kui Y, Jian-Min J, Shi L, Peng B, Wei H, Fei W, et al. Blood glucose is a  
11 representative of the clustered indicators of multi-organ injury for predicting mortality of COVID-  
12 19 in Wuhan, China. medRxiv. 2020.  
13
- 14 130. Jing G, Hui D, Song Qing X, Yi Zhao H, Dingkun W, Yan Z, et al. Correlation Analysis  
15 Between Disease Severity and Inflammation-related Parameters in Patients with COVID-19  
16 Pneumonia. medRxiv. 2020.  
17
- 18 131. Kuang Y, Zhang H, Zhou R. Epidemiological and Clinical Characteristics of 944 Cases of  
19 2019 Novel Coronavirus Infection of Non-COVID-19 Exporting City, Zhejiang, China. SSRN.  
20 2020.  
21
- 22 132. Ladan G, Mina Akbari R, Robert B, Abolghasem A, Team MC-R, Benyamin H.  
23 Demographic and Clinical Characteristics of the Severe Covid-19 Infections: First Report from  
24 Mashhad University of Medical Sciences, Iran. medRxiv. 2020.  
25
- 26 133. Lee N-Y, Li C-W, Tsai H-P, Chen P-L, Syue L-S, Li M-C, et al. A case of COVID-19 and  
27 pneumonia returning from Macau in Taiwan: Clinical course and anti-SARS-CoV-2 IgG  
28 dynamic. *Journal of microbiology, immunology, and infection = Wei mian yu gan ran za zhi*.  
29 2020;53(3):485-7.  
30
- 31 134. Lei D, Li C, Fang C, et al. Clinical characteristics of pregnancy with the 2019 novel  
32 coronavirus disease (COVID-19) infection. *Chinese Journal of Perinatal Medicine*.  
33 2020;23(3):157-63.  
34
- 35 135. Lei Z, Cao H, Jie Y, Huang Z, Guo X, Chen J, et al. A cross-sectional comparison of  
36 epidemiological and clinical features of patients with coronavirus disease (COVID-19) in Wuhan  
37 and outside Wuhan, China. *Travel medicine and infectious disease*. 2020:101664.  
38
- 39 136. Li H, Xiang X, Ren H, Xu L, Zhao L, Chen X, et al. SAA is a biomarker to distinguish the  
40 severity and prognosis of Coronavirus Disease 2019 (COVID-19). *The Journal of infection*.  
41 2020;80(6):646-55.  
42
- 43 137. Li J, Wang X, Chen J, Zhang H, Deng A. Association of Renin-Angiotensin System  
44 Inhibitors With Severity or Risk of Death in Patients With Hypertension Hospitalized for  
45 Coronavirus Disease 2019 (COVID-19) Infection in Wuhan, China. *JAMA cardiology*. 2020.  
46
- 47 138. Li N, Han L, Peng M, Lv Y, Ouyang Y, Liu K, et al. Maternal and neonatal outcomes of  
48 pregnant women with COVID-19 pneumonia: a case-control study. *Clinical infectious diseases*:  
49 an official publication of the Infectious Diseases Society of America. 2020.  
50
- 51 139. Li W, Cui H, Li K, Fang Y, Li S. Chest computed tomography in children with COVID-19  
52 respiratory infection. *Pediatric radiology*. 2020;50(6):796-9.  
53  
54  
55  
56  
57  
58  
59  
60

- 1  
2  
3 140. Li X, Wu Q, Lv B. Can Search Query Forecast successfully in China's 2019-nCov  
4 pneumonia? medRxiv. 2020.  
5
- 6 141. Li X, Xu S, Yu M, Wang K, Tao Y, Zhou Y, et al. Risk factors for severity and mortality in  
7 adult COVID-19 inpatients in Wuhan. *The Journal of allergy and clinical immunology*. 2020.  
8
- 9 142. Li X, Zeng W, Li X, Chen H, Shi L, Li X, et al. CT imaging changes of corona virus  
10 disease 2019(COVID-19): a multi-center study in Southwest China. *Journal of translational*  
11 *medicine*. 2020;18(1):154.  
12
- 13 143. Liang W, Guan W, Chen R, Wang W, Li J, Xu K, et al. Cancer patients in SARS-CoV-2  
14 infection: a nationwide analysis in China. *The Lancet Oncology*. 2020;21(3):335-7.  
15
- 16 144. Liang WH, Guan WJ, Li CC, Li YM, Liang HR, Zhao Y, et al. Clinical characteristics and  
17 outcomes of hospitalised patients with COVID-19 treated in Hubei (epicenter) and outside Hubei  
18 (non-epicenter): A Nationwide Analysis of China. *The European respiratory journal*. 2020.  
19
- 20 145. Liao J, He X, Gong Q, Yang L, Zhou C, Li J. Analysis of vaginal delivery outcomes  
21 among pregnant women in Wuhan, China during the COVID-19 pandemic. *International journal*  
22 *of gynaecology and obstetrics: the official organ of the International Federation of Gynaecology*  
23 *and Obstetrics*. 2020;150(1):53-7.  
24
- 25 146. Liu CY, Huang LJ, Lai CH, Chen HP, Chen TL, Fung CP, et al. Clinical characteristics,  
26 management and prognostic factors in patients with probable severe acute respiratory  
27 syndrome (SARS) in a SARS center in Taiwan. *Journal of the Chinese Medical Association :*  
28 *JCMA*. 2005;68(3):110-7.  
29
- 30 147. Liu H, Liu F, Li J, Zhang T, Wang D, Lan W. Clinical and CT Imaging Features of the  
31 COVID-19 Pneumonia: Focus on Pregnant Women and Children. *The Journal of infection*.  
32 2020;80(5):e7-e13.  
33
- 34 148. Liu R, Han H, Liu F, Lv Z, Wu K, Liu Y, et al. Positive rate of RT-PCR detection of  
35 SARS-CoV-2 infection in 4880 cases from one hospital in Wuhan, China, from Jan to Feb 2020.  
36 *Clinica chimica acta; international journal of clinical chemistry*. 2020;505:172-5.  
37
- 38 149. Liu S, Luo H, Wang Y, Wang D, Ju S, Yang Y. Characteristics and Associations with  
39 Severity in COVID-19 Patients: A Multicentre Cohort Study from Jiangsu Province, China.  
40 *SSRN*. 2020.  
41
- 42 150. Liu T, Hu J, Xiao J, He G, Kang M, Rong Z, et al. Time-varying transmission dynamics of  
43 Novel Coronavirus Pneumonia in China. *bioRxiv*. 2020.  
44
- 45 151. Liu W, Tao ZW, Lei W, Ming-Li Y, Kui L, Ling Z, et al. Analysis of factors associated with  
46 disease outcomes in hospitalized patients with 2019 novel coronavirus disease. *Chinese*  
47 *medical journal*. 2020;133(9):1032-8.  
48
- 49 152. Liu W, Wang Q, Zhang Q, Chen L, Chen J, Zhang B, et al. Coronavirus disease 2019  
50 (COVID-19) during pregnancy: a case series. *Preprints*. 2020.  
51
- 52 153. Liu W, Zhang Q, Chen J, Xiang R, Song H, Shu S, et al. Detection of Covid-19 in  
53 Children in Early January 2020 in Wuhan, China. *The New England journal of medicine*.  
54 2020;382(14):1370-1.  
55  
56  
57  
58  
59  
60

- 1  
2  
3 154. Liu Y, Du X, Chen J, Jin Y, Peng L, Wang HHX, et al. Neutrophil-to-lymphocyte ratio as  
4 an independent risk factor for mortality in hospitalized patients with COVID-19. *The Journal of*  
5 *infection*. 2020.  
6  
7 155. Liu Y, Yang Y, Zhang C, Huang F, Wang F, Yuan J, et al. Clinical and biochemical  
8 indexes from 2019-nCoV infected patients linked to viral loads and lung injury. *Science China*  
9 *Life sciences*. 2020;63(3):364-74.  
10  
11 156. Lopes RD, Macedo AVS, de Barros ESPGM, Moll-Bernardes RJ, Feldman A, D'Andréa  
12 Saba Arruda G, et al. Continuing versus suspending angiotensin-converting enzyme inhibitors  
13 and angiotensin receptor blockers: Impact on adverse outcomes in hospitalized patients with  
14 severe acute respiratory syndrome coronavirus 2 (SARS-CoV-2). *American heart journal*.  
15 2020;226:49-59.  
16  
17 157. Lu L, Xiong W, Liu D, Liu J, Yang D, Li N, et al. New-onset acute symptomatic seizure  
18 and risk factors in Corona Virus Disease 2019: A Retrospective Multicenter Study. *Epilepsia*.  
19 2020.  
20  
21 158. Luo XM, Zhou W, Xia H, Yang W, Yan X, Wang B. Characteristics of SARS-CoV-2  
22 Infected Patients with Clinical Outcome During Epidemic Ongoing Outbreak in Wuhan, China.  
23 SSRN. 2020.  
24  
25 159. Meng H, Xiong R, He R, Lin W, Hao B, Zhang L, et al. CT imaging and clinical course of  
26 asymptomatic cases with COVID-19 pneumonia at admission in Wuhan, China. *The Journal of*  
27 *infection*. 2020.  
28  
29 160. Mingzhu Y, Lijuan Z, Guangtong D, Chaofei H, Minxue S, Hongyin S, et al. Severe Acute  
30 Respiratory Syndrome Coronavirus 2 (SARS-CoV-2) Infection During Pregnancy In China: A  
31 Retrospective Cohort Study. *medRxiv*. 2020.  
32  
33 161. Mo P, Xing Y, Xiao Y, Deng L, Zhao Q, Wang H, et al. Clinical characteristics of  
34 refractory COVID-19 pneumonia in Wuhan, China. *Clinical infectious diseases : an official*  
35 *publication of the Infectious Diseases Society of America*. 2020(ciaa270).  
36  
37 162. Muhammad O, Takasar H, Mureed H, Aziz Ullah A, Dumitru B. Estimation of  
38 Transmission Potential and Severity of COVID-19 in Romania and Pakistan. *medRxiv*. 2020.  
39  
40 163. Nikpouraghdam M, Jalali Farahani A, Alishiri G, Heydari S, Ebrahimnia M, Samadinia H,  
41 et al. Epidemiological characteristics of coronavirus disease 2019 (COVID-19) patients in IRAN:  
42 A single center study. *Journal of clinical virology : the official publication of the Pan American*  
43 *Society for Clinical Virology*. 2020;127:104378.  
44  
45 164. Novel Coronavirus Pneumonia Emergency Response Epidemiology T. [The  
46 epidemiological characteristics of an outbreak of 2019 novel coronavirus diseases (COVID-19)  
47 in China]. *Zhonghua liu xing bing xue za zhi = Zhonghua liuxingbingxue zazhi*. 2020;41(2):145-  
48 51.  
49  
50 165. Pan Y, Guan H, Zhou S, Wang Y, Li Q, Zhu T, et al. Initial CT findings and temporal  
51 changes in patients with the novel coronavirus pneumonia (2019-nCoV): a study of 63 patients  
52 in Wuhan, China. *European radiology*. 2020;30(6):3306-9.  
53  
54  
55  
56  
57  
58  
59  
60



- 1  
2  
3 166. Peng YD, Meng K, Guan HQ, Leng L, Zhu RR, Wang BY, et al. [Clinical characteristics  
4 and outcomes of 112 cardiovascular disease patients infected by 2019-nCoV]. *Zhonghua xin*  
5 *xue guan bing za zhi*. 2020;48(0):E004.  
6
- 7 167. Qian GQ, Yang NB, Ding F, Ma AHY, Wang ZY, Shen YF, et al. Epidemiologic and  
8 Clinical Characteristics of 91 Hospitalized Patients with COVID-19 in Zhejiang, China: A  
9 retrospective, multi-centre case series. *QJM : monthly journal of the Association of Physicians*.  
10 2020.  
11
- 12 168. Qiao S, Kailiang Z, Jia Y, Jiarui F, Kaiping Z, Xiaoyi Z, et al. Clinical characteristics of  
13 101 non-surviving hospitalized patients with COVID-19: A single center, retrospective study.  
14 *medRxiv*. 2020.  
15
- 16 169. Qin C, Zhou L, Hu Z, Zhang S, Yang S, Tao Y, et al. Dysregulation of immune response  
17 in patients with COVID-19 in Wuhan, China. *Clinical infectious diseases : an official publication*  
18 *of the Infectious Diseases Society of America*. 2020(ciaa248).  
19
- 20 170. Qiu H, Wu J, Hong L, Luo Y, Song Q, Chen D. Clinical and epidemiological features of  
21 36 children with coronavirus disease 2019 (COVID-19) in Zhejiang, China: an observational  
22 cohort study. *The Lancet Infectious diseases*. 2020;20(6):689-96.  
23
- 24 171. Ran L, Chen X, Wang Y, Wu W, Zhang L, Tan X. Risk Factors of Healthcare Workers  
25 with Corona Virus Disease 2019: A Retrospective Cohort Study in a Designated Hospital of  
26 Wuhan in China. *Clinical infectious diseases : an official publication of the Infectious Diseases*  
27 *Society of America*. 2020.  
28
- 29 172. Ren LL, Wang YM, Wu ZQ, Xiang ZC, Guo L, Xu T, et al. Identification of a novel  
30 coronavirus causing severe pneumonia in human: a descriptive study. *Chinese medical journal*.  
31 2020;133(9):1015-24.  
32
- 33 173. Ruan Q, Yang K, Wang W, Jiang L, Song J. Clinical predictors of mortality due to  
34 COVID-19 based on an analysis of data of 150 patients from Wuhan, China. *Intensive care*  
35 *medicine*. 2020;46(5):846-8.  
36
- 37 174. Rui N, Shao-shuai W, Qiong Y, Cui-fang F, Yu-ling L, Wen-cong H, et al. Clinical  
38 features and the maternal and neonatal outcomes of pregnant women with coronavirus disease  
39 2019. *medRxiv*. 2020.  
40
- 41 175. Shang J, Du R, Lu Q, Wu J, Xu S, Ke Z, et al. The Treatment and Outcomes of Patients  
42 with COVID-19 in Hubei, China: A Multi-Centered, Retrospective, Observational Study. *SSRN*.  
43 2020.  
44
- 45 176. Shen Q, Guo W, Guo T, Li J, He W, Ni S, et al. Novel coronavirus infection in children  
46 outside of Wuhan, China. *Pediatric pulmonology*. 2020;55(6):1424-9.  
47
- 48 177. Shen X, Lin F, Jun F, Hui-Xian X, Ying X, Zhu-Xia T, et al. Acute kidney injury at early  
49 stage as a negative prognostic indicator of patients with COVID-19: a hospital-based  
50 retrospective analysis. *medRxiv*. 2020.  
51
- 52 178. Shi H, Han X, Jiang N, Cao Y, Alwalid O, Gu J, et al. Radiological findings from 81  
53 patients with COVID-19 pneumonia in Wuhan, China: a descriptive study. *The Lancet Infectious*  
54 *diseases*. 2020;20(4):425-34.  
55  
56  
57  
58  
59  
60

- 1  
2  
3 179. Shi S, Qin M, Shen B, Cai Y, Liu T, Yang F, et al. Association of Cardiac Injury With  
4 Mortality in Hospitalized Patients With COVID-19 in Wuhan, China. *JAMA cardiology*. 2020.  
5
- 6 180. Su L, Ma X, Yu H, Zhang Z, Bian P, Han Y, et al. The different clinical characteristics of  
7 corona virus disease cases between children and their families in China - the character of  
8 children with COVID-19. *Emerging microbes & infections*. 2020;9(1):707-13.  
9
- 10 181. Sun F KHWS, et al. Medication Patterns and Disease Progression Among 165 Patients  
11 with Coronavirus Disease 2019 (COVID-19) in Wuhan, China: A Single-Centered,  
12 Retrospective, Observational Study. 2020.  
13
- 14 182. Sun X, Wang J, Liu Z, Zhou X, Yan Xw, Li T. Characteristics of Patients with COVID-19  
15 Pneumonia Admitted to the Intensive Care Unit and Predictors of Mortality in Wuhan, China: A  
16 Single-Centered Retrospective Cohort Study. *SSRN*. 2020.  
17
- 18 183. Sun Y, Koh V, Marimuthu K, Ng OT, Young B, Vasoo S, et al. Epidemiological and  
19 Clinical Predictors of COVID-19. *Clinical infectious diseases : an official publication of the*  
20 *Infectious Diseases Society of America*. 2020.  
21
- 22 184. Suochen T, Zhenqin C, Yunxia W, Min W, Wenming Z, Guijie Z, et al. Clinical  
23 characteristics and reasons of different duration from onset to release from quarantine for  
24 patients with COVID-19 Outside Hubei province, China. *medRxiv*. 2020.  
25
- 26 185. Taghizadieh A, Mikaeili H, Ahmadi M, Valizadeh H. Acute kidney injury in pregnant  
27 women following SARS-CoV-2 infection: A case report from Iran. *Respiratory medicine case*  
28 *reports*. 2020;30:101090.  
29
- 30 186. Tian S, Hu N, Lou J, Chen K, Kang X, Xiang Z, et al. Characteristics of COVID-19  
31 infection in Beijing. *The Journal of infection*. 2020;80(4):401-6.  
32
- 33 187. Ting D, Jinjin Z, Tian W, Pengfei C, Zhe C, Jingjing J, et al. A Multi-hospital Study in  
34 Wuhan, China : Protective Effects of Non-menopause and Female Hormones on SARS-CoV-2  
35 infection. *medRxiv*. 2020.  
36
- 37 188. Tong ZD, Tang A, Li KF, Li P, Wang HL, Yi JP, et al. Potential Presymptomatic  
38 Transmission of SARS-CoV-2, Zhejiang Province, China, 2020. *Emerging infectious diseases*.  
39 2020;26(5):1052-4.  
40
- 41 189. University of M-C. COVID-19 in Patients With HIV. *clinicaltrials.gov*. 2020.  
42
- 43 190. Wang D, Hu B, Hu C, Zhu F, Liu X, Zhang J, et al. Clinical Characteristics of 138  
44 Hospitalized Patients With 2019 Novel Coronavirus-Infected Pneumonia in Wuhan, China.  
45 *JAMA*. 2020;323(11):1061-9.  
46
- 47 191. Wang D, Ju XL, Xie F, Lu Y, Li FY, Huang HH, et al. [Clinical analysis of 31 cases of  
48 2019 novel coronavirus infection in children from six provinces (autonomous region) of northern  
49 China]. *Zhonghua er ke za zhi = Chinese journal of pediatrics*. 2020;58(4):E011.  
50
- 51 192. Wang K, Zuo PY, Liu Y, Zhang M, Zhao X, Xie S, et al. Clinical and Laboratory  
52 Predictors of In-Hospital Mortality in 305 Patients with COVID-19: A Cohort Study in Wuhan,  
53 China. *SSRN*. 2020.  
54  
55  
56  
57  
58  
59  
60

- 1  
2  
3 193. Wang L, He W, Yu X, Hu D, Bao M, Liu H, et al. Coronavirus Disease 2019 in elderly  
4 patients: characteristics and prognostic factors based on 4-week follow-up. *The Journal of*  
5 *infection*. 2020;80(6):639-45.  
6  
7 194. Wang L, Li X, Chen H, Yan S, Li D, Li Y, et al. Coronavirus Disease 19 Infection Does  
8 Not Result in Acute Kidney Injury: An Analysis of 116 Hospitalized Patients from Wuhan, China.  
9 *American journal of nephrology*. 2020;51(5):1-6.  
10  
11 195. Wang R, Pan M, Zhang X, Fan X, Han M, Zhao F, et al. Epidemiological and clinical  
12 features of 125 Hospitalized Patients with COVID-19 in Fuyang, Anhui, China. *International*  
13 *journal of infectious diseases : IJID : official publication of the International Society for Infectious*  
14 *Diseases*. 2020;95:421-8.  
15  
16 196. Wang S, Guo L, Chen L, Liu W, Cao Y, Zhang J, et al. A case report of neonatal COVID-  
17 19 infection in China. *Clinical infectious diseases : an official publication of the Infectious*  
18 *Diseases Society of America*. 2020.  
19  
20 197. Wang Y, Liu Y, Liu L, Wang X, Luo N, Ling L. Clinical outcome of 55 asymptomatic  
21 cases at the time of hospital admission infected with SARS-Coronavirus-2 in Shenzhen, China.  
22 *The Journal of infectious diseases*. 2020;221(11):1770-4.  
23  
24 198. Wang Z, Yang B, Li Q, Wen L, Zhang R. Clinical Features of 69 Cases with Coronavirus  
25 Disease 2019 in Wuhan, China. *Clinical infectious diseases : an official publication of the*  
26 *Infectious Diseases Society of America*. 2020(ciaa272).  
27  
28 199. Wei YY, Wang RR, Zhang DW, Tu YH, Chen CS, Ji S, et al. Risk factors for severe  
29 COVID-19: evidence from 167 hospitalized patients in Anhui, China. *The Journal of infection*.  
30 2020.  
31  
32 200. Wen R, Sun Y, Xing Q-S. A patient with SARS-CoV-2 infection during pregnancy in  
33 Qingdao, China. *Journal of Microbiology, Immunology and Infection*. 2020.  
34  
35 201. Wu C, Chen X, Cai Y, Xia J, Zhou X, Xu S, et al. Risk Factors Associated With Acute  
36 Respiratory Distress Syndrome and Death in Patients With Coronavirus Disease 2019  
37 Pneumonia in Wuhan, China. *JAMA internal medicine*. 2020.  
38  
39 202. Wu JT, Leung K, Bushman M, Kishore N, Niehus R, de Salazar PM, et al. Estimating  
40 clinical severity of COVID-19 from the transmission dynamics in Wuhan, China. *Nature*  
41 *medicine*. 2020;26(4):506-10.  
42  
43 203. Wu W, Wang J, Liu P, Chen W, Yin S, Jiang S, et al. A hospital outbreak of severe acute  
44 respiratory syndrome in Guangzhou, China. *Chinese medical journal*. 2003;116(6):811-8.  
45  
46 204. Xia W, Shao J, Guo Y, Peng X, Li Z, Hu D. Clinical and CT features in pediatric patients  
47 with COVID-19 infection: Different points from adults. *Pediatric pulmonology*. 2020;55(5):1169-  
48 74.  
49  
50 205. Xianfei Z, Hongyan F, Dongxue L, Fang H, Xi M, Zhuo L, et al. Association between  
51 ABO blood groups and clinical outcome of coronavirus disease 2019: Evidence from two  
52 cohorts. *medRxiv*. 2020.  
53  
54  
55  
56  
57  
58  
59  
60

- 1  
2  
3 206. Xiao K, Shui L, Pang X, et al. The clinical features of the 143 patients with COVID-19 in  
4 North-East of Chongqing. *第三军医大学学报 (Journal of Third Military Medical University)*.  
5 2020;6:549-54.  
6  
7  
8 207. Xiufeng J, Jianxin T, Hui W, Yixin W, Wei Z, Min Z, et al. Clinical features and  
9 management of severe COVID-19: A retrospective study in Wuxi, Jiangsu Province, China.  
10 medRxiv. 2020.  
11  
12 208. Xu C, Fang Z, Yanhua Q, Shuizi D, Danhui Y, Cheng L, et al. Epidemiological and  
13 clinical features of 291 cases with coronavirus disease 2019 in areas adjacent to Hubei, China:  
14 a double-center observational study. medRxiv. 2020:2020.03.03.20030353.  
15  
16 209. Xu H, Yan C, Fu Q, Xiao K, Yu Y, Han D, et al. Possible environmental effects on the  
17 spread of COVID-19 in China. *The Science of the total environment*. 2020;731:139211.  
18  
19 210. Xun L, Luwen W, Shaonan Y, Fan Y, Longkui X, Jiling Z, et al. Clinical characteristics of  
20 25 death cases infected with COVID-19 pneumonia: a retrospective review of medical records in  
21 a single medical center, Wuhan, China. medRxiv. 2020.  
22  
23 211. Yafei W, Ying Z, Zhen Y, Dongping X, Shuang G. Clinical Characteristics of Patients  
24 with Severe Pneumonia Caused by the 2019 Novel Coronavirus in Wuhan, China. medRxiv.  
25 2020.  
26  
27 212. Yang W, Cao Q, Qin L, Wang X, Cheng Z, Pan A, et al. Clinical characteristics and  
28 imaging manifestations of the 2019 novel coronavirus disease (COVID-19): A multi-center study  
29 in Wenzhou city, Zhejiang, China. *The Journal of infection*. 2020;80(4):388-93.  
30  
31 213. Yang X, Yu Y, Xu J, Shu H, Xia J, Liu H, et al. Clinical course and outcomes of critically  
32 ill patients with SARS-CoV-2 pneumonia in Wuhan, China: a single-centered, retrospective,  
33 observational study. *The Lancet Respiratory medicine*. 2020;8(5):475-81.  
34  
35 214. Yao Q, Wang P, Wang X, Qie G, Meng M, Tong X, et al. Retrospective study of risk  
36 factors for severe SARS-Cov-2 infections in hospitalized adult patients. *Polish archives of*  
37 *internal medicine*. 2020;130(5):390-9.  
38  
39 215. Yao T, Gao Y, Cui Q, Shen J, Peng B, Chen Y, et al. Clinical Characteristics of 55  
40 Cases of Deaths with COVID-19 Pneumonia in Wuhan, China: Retrospective Case Series.  
41 SSRN. 2020.  
42  
43 216. Yi H, Haidong Z, Sucheng M, Wei W, Chaoyuan J, Yuan X, et al. Lactate  
44 dehydrogenase, a Risk Factor of Severe COVID-19 Patients. medRxiv. 2020.  
45  
46 217. Yin Y, Zhou S, Zhang X, Li Z, Liu X, Jiang C. Critically Ill Patients with COVID-19 in  
47 China: A Multicenter Retrospective Observational Study. SSRN. 2020.  
48  
49 218. Yu N, Li W, Kang Q, Xiong Z, Wang S, Lin X, et al. Clinical features and obstetric and  
50 neonatal outcomes of pregnant patients with COVID-19 in Wuhan, China: a retrospective,  
51 single-centre, descriptive study. *The Lancet Infectious diseases*. 2020;20(5):559-64.  
52  
53 219. Yuan M, Yin W, Tao Z, Tan W, Hu Y. Association of radiologic findings with mortality of  
54 patients infected with 2019 novel coronavirus in Wuhan, China. *PloS one*.  
55 2020;15(3):e0230548.  
56  
57  
58  
59  
60

- 1  
2  
3 220. Zamaniyan M, Ebadi A, Aghajanpoor Mir S, Rahmani Z, Haghshenas M, Azizi S. Preterm delivery in pregnant woman with critical COVID-19 pneumonia and vertical transmission. *Prenatal diagnosis*. 2020.
- 7 221. Zareie B, Roshani A, Mansournia MA, Rasouli MA, Moradi G. A Model for COVID-19 Prediction in Iran Based on China Parameters. *Archives of Iranian medicine*. 2020;23(4):244-8.
- 11 222. Zeng L, Xia S, Yuan W, Yan K, Xiao F, Shao J, et al. Neonatal Early-Onset Infection With SARS-CoV-2 in 33 Neonates Born to Mothers With COVID-19 in Wuhan, China. *JAMA pediatrics*. 2020.
- 15 223. Zhang G, Zhang J, Wang B, Zhu X, Wang Q, Qiu S. Analysis of clinical characteristics and laboratory findings of 95 cases of 2019 novel coronavirus pneumonia in Wuhan, China: a retrospective analysis. *Respiratory research*. 2020;21(1):74.
- 19 224. Zhang H-n. A Medical Records Based Study for the Correlation between Angiotensin II Type 1 Receptor Blockers (ARBs) and the Progression and Outcome of Novel Coronavirus Pneumonia (COVID-19). *Chinese Clinical Trial Registry*. 2020.
- 23 225. Zhang J, Wang X, Jia X, Li J, Hu K, Chen G, et al. Risk factors for disease severity, unimprovement, and mortality of COVID-19 patients in Wuhan, China. *Clinical microbiology and infection : the official publication of the European Society of Clinical Microbiology and Infectious Diseases*. 2020;26(6):767-72.
- 27 226. Zhang JJ, Dong X, Cao YY, Yuan YD, Yang YB, Yan YQ, et al. Clinical characteristics of 140 patients infected with SARS-CoV-2 in Wuhan, China. *Allergy*. 2020.
- 31 227. Zhang L, Dong L, Ming L, Wei M, Li J, Hu R, et al. Severe Acute Respiratory Syndrome Coronavirus 2(SARS-CoV-2) infection during late pregnancy: A Report of 18 patients from Wuhan, China. *Research Square*. 2020.
- 35 228. Zhang L, Zhu F, Xie L, Wang C, Wang J, Chen R, et al. Clinical characteristics of COVID-19-infected cancer patients: A retrospective case study in three hospitals within Wuhan, China. *Annals of oncology : official journal of the European Society for Medical Oncology*. 2020.
- 39 229. Zhang MQ, Wang XH, Chen YL, Zhao KL, Cai YQ, An CL, et al. [Clinical features of 2019 novel coronavirus pneumonia in the early stage from a fever clinic in Beijing]. *Zhonghua jie he he hu xi za zhi = Zhonghua jiehe he huxi zazhi = Chinese journal of tuberculosis and respiratory diseases*. 2020;43(0):E013.
- 43 230. Zhang S, Guo M, Duan L, Wu F, Wang Z, Xu J. Short Term Outcomes and Risk Factors for Mortality in Patients with COVID-19 in Wuhan, China: A Retrospective Study. *SSRN*. 2020.
- 47 231. Zhang WR, Wang K, Yin L, Zhao WF, Xue Q, Peng M, et al. Mental Health and Psychosocial Problems of Medical Health Workers during the COVID-19 Epidemic in China. *Psychotherapy and psychosomatics*. 2020:1-9.
- 51 232. Zhang Y, Zheng L, Liu L, Zhao M, Xiao J, Zhao Q. Liver impairment in COVID-19 patients: a retrospective analysis of 115 cases from a single center in Wuhan city, China. *Liver international : official journal of the International Association for the Study of the Liver*. 2020.

- 1  
2  
3 233. Zhang ZJ, Yu XJ, Fu T, Liu Y, Jiang Y, Yang BX, et al. Novel Coronavirus Infection in  
4 Newborn Babies Under 28 Days in China. *The European respiratory journal*. 2020.  
5  
6 234. Zheng F, Liao C, Fan QH, Chen HB, Zhao XG, Xie ZG, et al. Clinical Characteristics of  
7 Children with Coronavirus Disease 2019 in Hubei, China. *Current medical science*.  
8 2020;40(2):275-80.  
9  
10 235. Zhou F, Yu T, Du R, Fan G, Liu Y, Liu Z, et al. Clinical course and risk factors for  
11 mortality of adult inpatients with COVID-19 in Wuhan, China: a retrospective cohort study.  
12 *Lancet (London, England)*. 2020;395(10229):1054-62.  
13  
14 236. Zhou Y, Zhang Z, Tian J, Xiong S. Risk factors associated with disease progression in a  
15 cohort of patients infected with the 2019 novel coronavirus. *Annals of palliative medicine*.  
16 2020;9(2):428-36.  
17  
18 237. Zhu H, Wang L, Fang C, Peng S, Zhang L, Chang G, et al. Clinical analysis of 10  
19 neonates born to mothers with 2019-nCoV pneumonia. *Translational pediatrics*. 2020;9(1):51-  
20 60.  
21  
22 238. Zhu Q, Zhao S, Lai X, Zhao J, Guo D, Gan L. Dose-Response Association between Risk  
23 Factors and Incidence of COVID-19 in 325 Hospitalized Patients: A Multicenter Retrospective  
24 Cohort Study. *SSRN*. 2020.  
25  
26 239. Zhu W, Xie K, Lu H, Xu L, Zhou S, Fang S. Initial clinical features of suspected  
27 Coronavirus Disease 2019 in two emergency departments outside of Hubei, China. *Journal of*  
28 *medical virology*. 2020.  
29  
30 240. Zhu X, Yuan W, Huang K, Wang Q, Yao S, Lu W, et al. Clinical Features and Short-  
31 Term Outcomes of 114 Elderly Patients with COVID-19 in Wuhan, China: A Single-Center,  
32 Retrospective, Observational Study. *SSRN*. 2020.  
33  
34  
35

### 36 Excluded – duplicate at full text (n=3)

- 37  
38 1. Cummings MJ, Baldwin MR, Abrams D, Jacobson SD, Meyer BJ, Balough EM, et al.  
39 Epidemiology, clinical course, and outcomes of critically ill adults with COVID-19 in New York  
40 City: a prospective cohort study. *Lancet (London, England)*. 2020;395(10239):1763-70.  
41  
42 2. Simonnet A, Chetboun M, Poissy J, Raverdy V, Noulette J, Duhamel A, et al. High  
43 Prevalence of Obesity in Severe Acute Respiratory Syndrome Coronavirus-2 (SARS-CoV-2)  
44 Requiring Invasive Mechanical Ventilation. *Obesity (Silver Spring, Md)*. 2020.  
45  
46 3. Temgoua MN, Kuate LM, Ngatchou W, Sibetcheu A, Toupendi ZN, Belobo G, et al.  
47 Thromboembolic risks in patients with COVID-19: major concern to consider in our  
48 management. *The Pan African medical journal*. 2020;35(Suppl 2):10.  
49  
50  
51

### 52 Excluded – not English or French (n=5)

- 53  
54 1. Alcocer-Gamba MA, Gutierrez-Fajardo P, Sosa-Caballero A, Cabrera-Raygo A, Faradji-  
55 Hazan RN, Padilla-Padilla FG, et al. Recommendations for the care of patients with diabetes  
56  
57  
58  
59  
60

mellitus with risk factors or established cardiovascular disease and SARS-CoV-2 mellitus con factores de riesgo o enfermedad cardiovascular establecida y SARS-CoV-2. Recomendaciones para la atención de pacientes con diabetes. 2020;90(Supl):77-83.

2. Devulapalli CS. COVID-19 - a mild disease in children. Covid-19 - mildt forlop hos barn. 2020;140(6).

3. González Romero D, Ocampo Pérez J, González Bautista L, Santana-Cabrera L. [Pregnancy and perinatal outcome of a woman with COVID-19 infection]. Revista clinica espanola. 2020.

4. Perez-Girbes A. Acute Pulmonary Embolism and Covid-19: A Common Association in Seriously Ill Patients? Tromboembolia pulmonar aguda y enfermedad por coronavirus (COVID-19): una asociacion frecuente en pacientes graves? 2020.

5. Sánchez-Álvarez JE, Pérez Fontán M, Jiménez Martín C, Blasco Pelicano M, Cabezas Reina CJ, Sevillano Prieto Á M, et al. SARS-CoV-2 infection in patients on renal replacement therapy. Report of the COVID-19 Registry of the Spanish Society of Nephrology (SEN). Nefrologia : publicacion oficial de la Sociedad Espanola Nefrologia. 2020.

#### **Excluded – no/wrong outcome (n=69)**

1. Abrams HR, Loomer L, Gandhi A, Grabowski DC. Characteristics of U.S. Nursing Homes with COVID-19 Cases. Journal of the American Geriatrics Society. 2020.

2. Alanio A, Delliere S, Fodil S, Bretagne S, Megarbane B. Prevalence of putative invasive pulmonary aspergillosis in critically ill patients with COVID-19. The Lancet Respiratory medicine. 2020;8(6):e48-e9.

3. Alvarez-Aragon LM, Cuesta-Munoz AL, Alvarez-Lopez I. Inquiring into Benefits of Independent Activation of Non-Classical Renin-Angiotensin System in the Clinical Prognosis and Reduction of COVID-19 mortality. Clinical infectious diseases : an official publication of the Infectious Diseases Society of America. 2020.

4. Arnaud F, Laura T, Yoann M, Rebecca G, Camille B, Nathalie J, et al. Cluster of COVID-19 in northern France: A retrospective closed cohort study. medRxiv. 2020.

5. Bandi S, Nevid MZ, Mahdavinia M. African American children are at higher risk of COVID-19 infection. Pediatric allergy and immunology : official publication of the European Society of Pediatric Allergy and Immunology. 2020.

6. Benzakoun J, Hmeydia G, Delabarde T, Hamza L, Meder J-F, Ludes B, et al. Excess out-of-hospital deaths during COVID-19 outbreak: evidence of pulmonary embolism as a main determinant. European journal of heart failure. 2020.

7. Bhasker AG, Greve JW. Are Patients Suffering from Severe Obesity Getting a Raw Deal During COVID-19 Pandemic? Obesity surgery. 2020:1-2.

8. Bouquet J, Tabor DE, Silver JS, Nair V, Tovchigrechko A, Griffin MP, et al. Microbial burden and viral exacerbations in a longitudinal multicenter COPD cohort. Respiratory research. 2020;21(1):77.

9. Carignan A, Valiquette L, Grenier C, Musonera JB, Nkengurutse D, Marcil-Héguy A, et al. Anosmia and dysgeusia associated with SARS-CoV-2 infection: an age-matched case-control study. *Cmaj*. 2020;192(26):E702-e7.
10. Chiappetta S, Sharma AM, Bottino V, Stier C. COVID-19 and the role of chronic inflammation in patients with obesity. *International journal of obesity (2005)*. 2020.
11. Chin T, Kahn R, Li R, Chen JT, Krieger N, Buckee CO, et al. U.S. county-level characteristics to inform equitable COVID-19 response. *medRxiv : the preprint server for health sciences*. 2020.
12. Cilia R, Bonvegna S, Straccia G, Andreasi NG, Elia AE, Romito LM, et al. Effects of COVID-19 on Parkinson's Disease Clinical Features: A Community-Based Case-Control Study. *Movement disorders : official journal of the Movement Disorder Society*. 2020.
13. Clemency BM, Varughese R, Scheafer DK, Ludwig B, Welch JV, McCormack RF, et al. Symptom Criteria for COVID-19 Testing of Health Care Workers. *Acad Emerg Med*. 2020;27(6):469-74.
14. Cox ZL, Lai P, Lindenfeld J. Deceases in Acute Heart Failure Hospitalizations during COVID-19. *European journal of heart failure*. 2020.
15. D'Avolio A, Avataneo V, Manca A, Cusato J, De Nicolo A, Lucchini R, et al. 25-Hydroxyvitamin D Concentrations Are Lower in Patients with Positive PCR for SARS-CoV-2. *Nutrients*. 2020;12(5).
16. Dangis A, De Brucker N, Heremans A, Gillis M, Frans J, Demeyere A, et al. Impact of gender on extent of lung injury in COVID-19. *Clinical radiology*. 2020;75(7):554-6.
17. David AK, Scott K, Olivier E. Clinical and Genetic Characteristics of Covid-19 Patients from UK Biobank. *medRxiv*. 2020.
18. de Lusignan S, Dorward J, Correa A, Jones N, Akinyemi O, Amirthalingam G, et al. Risk factors for SARS-CoV-2 among patients in the Oxford Royal College of General Practitioners Research and Surveillance Centre primary care network: a cross-sectional study. *The Lancet Infectious diseases*. 2020.
19. Di Castelnuovo A, De Caterina R, de Gaetano G, Iacoviello L. Controversial Relationship between Renin-Angiotensin System Inhibitors and Severity of COVID-19: Announcing a Large Multicentre Case-Control Study in Italy. *Hypertension (Dallas, Tex : 1979)*. 2020.
20. Doglietto F, Vezzoli M, Gheza F, Lussardi GL, Domenicucci M, Vecchiarelli L, et al. Factors Associated With Surgical Mortality and Complications Among Patients With and Without Coronavirus Disease 2019 (COVID-19) in Italy. *JAMA surgery*. 2020.
21. Dreher M, Kersten A, Bickenbach J, Balfanz P, Hartmann B, Cornelissen C, et al. The Characteristics of 50 Hospitalized COVID-19 Patients With and Without ARDS. *Deutsches Arzteblatt international*. 2020;117(16):271-8.
22. Duffy CR, Hart JM, Modest AM, Hacker MR, Golen T, Li Y, et al. Lymphopenia and Severe Acute Respiratory Syndrome Coronavirus 2 (SARS-CoV-2) Infection Among Hospitalized Obstetric Patients. *Obstetrics and gynecology*. 2020.



23. Favalli EG, Agape E, Caporali R. Incidence and Clinical Course of COVID-19 in Patients with Connective Tissue Diseases: A Descriptive Observational Analysis. *The Journal of rheumatology*. 2020.
24. Fernandez-Nieto D, Jimenez-Cauhe J, Suarez-Valle A, Moreno-Arrones OM, Saceda-Corralo D, Arana-Raja A, et al. Characterization of acute acro-ischemic lesions in non-hospitalized patients: a case series of 132 patients during the COVID-19 outbreak. *Journal of the American Academy of Dermatology*. 2020.
25. Fore HH. A wake-up call: COVID-19 and its impact on children's health and wellbeing. *The Lancet Global health*. 2020.
26. Garufi G, Carbognin L, Orlandi A, Tortora G, Bria E. Smoking habit and hospitalization for severe acute respiratory syndrome coronavirus 2 (SARS-CoV-2)-related pneumonia: The unsolved paradox behind the evidence. *European journal of internal medicine*. 2020.
27. Gemes K, Talback M, Modig K, Ahlbom A, Berglund A, Feychting M, et al. Burden and prevalence of prognostic factors for severe COVID-19 in Sweden. *European journal of epidemiology*. 2020;35(5):401-9.
28. Godaert L, Proye E, Demoustier-Tampere D, Coulibaly PS, Hequet F, Drame M. Clinical characteristics of older patients: The experience of a geriatric short-stay unit dedicated to patients with COVID-19 in France. *The Journal of infection*. 2020.
29. Haeck G, Ancion A, Marechal P, Oury C, Lancellotti P. [COVID-19 and cardiovascular diseases]. *COVID-19 et maladies cardiovasculaires*. 2020;75(4):226-32.
30. Hastie CE, Mackay DF, Ho F, Celis-Morales CA, Katikireddi SV, Niedzwiedz CL, et al. Vitamin D concentrations and COVID-19 infection in UK Biobank. *Diabetes Metab Syndr*. 2020;14(4):561-5.
31. Himmelstein DU, Woolhandler S. Health Insurance Status and Risk Factors for Poor Outcomes With COVID-19 Among U.S. Health Care Workers: A Cross-sectional Study. *Annals of internal medicine*. 2020.
32. Hirsch JS, Ng JH, Ross DW, Sharma P, Shah HH, Barnett RL, et al. Acute kidney injury in patients hospitalized with COVID-19. *Kidney international*. 2020.
33. Iacobellis G, Penaherrera CA, Bermudez LE, Bernal Mizrahi E. Admission hyperglycemia and radiological findings of SARS-CoV2 in patients with and without diabetes. *Diabetes research and clinical practice*. 2020;164:108185.
34. Ibrahim LF, Tosif S, McNab S, Hall S, Lee HJ, Lewena S, et al. SARS-CoV-2 testing and outcomes in the first 30 days after the first case of COVID-19 at an Australian children's hospital. *Emerg Med Australas*. 2020.
35. Jo MW, Go DS, Kim R, Lee SW, Ock M, Kim YE, et al. The Burden of Disease due to COVID-19 in Korea Using Disability-Adjusted Life Years. *J Korean Med Sci*. 2020;35(21):e199.
36. Kalan ME, Ghobadi H, Taleb ZB, Ward KD, Adham D, Matin S, et al. Descriptive characteristics of hospitalized adult smokers and never-smokers with COVID-19. *Tobacco induced diseases*. 2020;18:46.

- 1  
2  
3 37. Koehler P, Cornely OA, Bottiger BW, Dusse F, Eichenauer DA, Fuchs F, et al. COVID-  
4 19 associated pulmonary aspergillosis. *Mycoses*. 2020;63(6):528-34.  
5  
6 38. Lechien JR, Chiesa-Estomba CM, Place S, Van Laethem Y, Cabaraux P, Mat Q, et al.  
7 Clinical and epidemiological characteristics of 1420 European patients with mild-to-moderate  
8 coronavirus disease 2019. *J Intern Med*. 2020.  
9  
10 39. Leung JM, Yang CX, Tam A, Shaipanich T, Hackett T-L, Singhera GK, et al. ACE-2  
11 expression in the small airway epithelia of smokers and COPD patients: implications for COVID-  
12 19. *The European respiratory journal*. 2020;55(5).  
13  
14 40. Liotta G, Marazzi MC, Orlando S, Palombi L. Is social connectedness a risk factor for the  
15 spreading of COVID-19 among older adults? The Italian paradox. *PloS one*.  
16 2020;15(5):e0233329.  
17  
18 41. Lo E, Lasnier B. Active smoking and severity of coronavirus disease 2019 (COVID-19):  
19 The use of significance testing leads to an erroneous conclusion. *European journal of internal*  
20 *medicine*. 2020.  
21  
22 42. Maggi U, De Carlis L, Yiu D, Colledan M, Regalia E, Rossi G, et al. The impact of the  
23 COVID-19 outbreak on liver transplantation programs in Northern Italy. *Am J Transplant*.  
24 2020;20(7):1840-8.  
25  
26 43. Michelena X, Borrell H, Lopez-Corbeto M, Lopez-Lasanta M, Moreno E, Pascual-Pastor  
27 M, et al. Incidence of COVID-19 in a cohort of adult and paediatric patients with rheumatic  
28 diseases treated with targeted biologic and synthetic disease-modifying anti-rheumatic drugs.  
29 *Seminars in arthritis and rheumatism*. 2020;50(4):564-70.  
30  
31 44. Montopoli M, Zumerle S, Vettor R, Ruge M, Zorzi M, Catapano CV, et al. Androgen-  
32 deprivation therapies for prostate cancer and risk of infection by SARS-CoV-2: a population-  
33 based study (N = 4532). *Ann Oncol*. 2020.  
34  
35 45. Moschovas MC, Sighinolfi MC, Rocco B, Bhat S, Onof F, Rogers T, et al. Balancing the  
36 Effects of COVID-19 Against Potential Progression and Mortality in High-risk Prostate Cancer.  
37 *European urology*. 2020.  
38  
39 46. Nahama A, Ramachandran R, Cisternas AF, Ji H. The role of afferent pulmonary  
40 innervation in poor prognosis of acute respiratory distress syndrome in COVID-19 patients and  
41 proposed use of resiniferatoxin (RTX) to improve patient outcomes in advanced disease state: A  
42 review. *Medicine in drug discovery*. 2020:100033.  
43  
44 47. Notari A, Torrieri G. COVID-19 transmission risk factors. *medRxiv*. 2020.  
45  
46 48. Nouhjah S, Jahanfar S. Challenges of diabetes care management in developing  
47 countries with a high incidence of COVID-19: A brief report. *Diabetes & metabolic syndrome*.  
48 2020;14(5):731-2.  
49  
50 49. Ossami Saidy RR, Globke B, Pratschke J, Schoening W, Eurich D. Successful  
51 implementation of preventive measures leads to low relevance of SARS-CoV-2 in liver  
52 transplant patients: Observations from a German outpatient department. *Transplant infectious*  
53 *disease : an official journal of the Transplantation Society*. 2020.  
54  
55  
56  
57  
58  
59  
60

- 1  
2  
3 50. Pan F, Ye T, Sun P, Gui S, Liang B, Li L, et al. Time Course of Lung Changes at Chest  
4 CT during Recovery from Coronavirus Disease 2019 (COVID-19). *Radiology*. 2020;295(3):715-  
5 21.  
6  
7 51. Piccolo R, Bruzzese D, Mauro C, Aloia A, Baldi C, Boccalatte M, et al. Population  
8 Trends in Rates of Percutaneous Coronary Revascularization for Acute Coronary Syndromes  
9 Associated with the COVID-19 Outbreak. *Circulation*. 2020.  
10  
11 52. Pinto BG, Oliveira AE, Singh Y, Jimenez L, Goncalves AN, Ogava RL, et al. ACE2  
12 Expression is Increased in the Lungs of Patients with Comorbidities Associated with Severe  
13 COVID-19. *medRxiv : the preprint server for health sciences*. 2020.  
14  
15 53. Ramcharan T, Nolan O, Lai CY, Prabhu N, Krishnamurthy R, Richter AG, et al.  
16 Paediatric Inflammatory Multisystem Syndrome: Temporally Associated with SARS-CoV-2  
17 (PIMS-TS): Cardiac Features, Management and Short-Term Outcomes at a UK Tertiary  
18 Paediatric Hospital. *Pediatric cardiology*. 2020.  
19  
20 54. Rapezzi C, Tavazzi L, Ferrari R. The 'Black Death' and the physician at the time of  
21 COVID-19. *European heart journal*. 2020.  
22  
23 55. Reynolds HR, Adhikari S, Pulgarin C, Troxel AB, Iturrate E, Johnson SB, et al. Renin-  
24 Angiotensin-Aldosterone System Inhibitors and Risk of Covid-19. *The New England journal of*  
25 *medicine*. 2020.  
26  
27 56. Roxby AC, Greninger AL, Hatfield KM, Lynch JB, Dellit TH, James A, et al. Outbreak  
28 Investigation of COVID-19 Among Residents and Staff of an Independent and Assisted Living  
29 Community for Older Adults in Seattle, Washington. *JAMA Intern Med*. 2020.  
30  
31 57. Salzano A, D'Assante R, Stagnaro FM, Valente V, Crisci G, Giardino F, et al. Heart  
32 failure management during COVID-19 outbreak in Italy. *Telemedicine experience from a heart*  
33 *failure university tertiary referral centre*. *European journal of heart failure*. 2020.  
34  
35 58. Sardu C, D'Onofrio N, Balestrieri ML, Barbieri M, Rizzo MR, Messina V, et al. Outcomes  
36 in Patients With Hyperglycemia Affected by Covid-19: Can We Do More on Glycemic Control?  
37 *Diabetes care*. 2020.  
38  
39 59. Seltzer JA, Okeke CAV, Perry JD, Shipman WD, Okoye GA, Byrd AS. Exploring the risk  
40 of severe COVID-19 infection in hidradenitis suppurativa patients. *Journal of the American*  
41 *Academy of Dermatology*. 2020.  
42  
43 60. Sierpiński R, Pinkas J, Jankowski M, Zgliczyński WS, Wierzba W, Gujski M, et al. Sex  
44 differences in the frequency of gastrointestinal symptoms and olfactory or taste disorders in  
45 1942 nonhospitalized patients with coronavirus disease 2019 (COVID-19). *Pol Arch Intern Med*.  
46 2020;130(6):501-5.  
47  
48 61. Siniscalchi A, Gallelli L. Could COVID-19 represent a negative prognostic factor in  
49 patients with stroke? *Infection control and hospital epidemiology*. 2020:1.  
50  
51 62. Stoneham SM, Milne KM, Nuttal E, Frew GH, Sturrock BR, Sivaloganathan H, et al.  
52 Thrombotic risk in COVID-19: a case series and case-control study. *Clinical medicine (London,*  
53 *England)*. 2020.  
54  
55  
56  
57  
58  
59  
60

63. Tang JW, Young S, May S, Bird P, Bron J, Mohamedanif T, et al. Comparing hospitalised, community and staff COVID-19 infection rates during the early phase of the evolving COVID-19 epidemic. *The Journal of infection*. 2020.
64. Tekbali A, Grunebaum A, Saraya A, McCullough L, Bornstein E, Chervenak FA. Pregnant vs nonpregnant severe acute respiratory syndrome coronavirus 2 and coronavirus disease 2019 hospital admissions: the first 4 weeks in New York. *American journal of obstetrics and gynecology*. 2020.
65. Tolia VM, Chan TC, Castillo EM. Preliminary Results of Initial Testing for Coronavirus (COVID-19) in the Emergency Department. *The western journal of emergency medicine*. 2020;21(3):503-6.
66. Tostmann A, Bradley J, Bousema T, Yiek WK, Holwerda M, Bleeker-Rovers C, et al. Strong associations and moderate predictive value of early symptoms for SARS-CoV-2 test positivity among healthcare workers, the Netherlands, March 2020. *Euro Surveill*. 2020;25(16).
67. Wander PL, Orlov M, Merel SE, Enquobahrie DA. Risk factors for severe COVID-19 illness in healthcare workers: Too many unknowns. *Infection control and hospital epidemiology*. 2020:1-2.
68. Zahra R-E, Celeste M, Maddalena A, Mae SB, Jackie C, Cyrus C, et al. NON-WHITE ETHNICITY, MALE SEX, AND HIGHER BODY MASS INDEX, BUT NOT MEDICATIONS ACTING ON THE RENIN-ANGIOTENSIN SYSTEM ARE ASSOCIATED WITH CORONAVIRUS DISEASE 2019 (COVID-19) HOSPITALISATION: REVIEW OF THE FIRST 669 CASES FROM THE UK BIOBANK. *medRxiv*. 2020.
69. Zwald ML, Lin W, Sondermeyer Cooksey GL, Weiss C, Suarez A, Fischer M, et al. Rapid Sentinel Surveillance for COVID-19 - Santa Clara County, California, March 2020. *MMWR Morb Mortal Wkly Rep*. 2020;69(14):419-21.

#### **Excluded – no/wrong risk factor (n=63)**

1. Al-Tawfiq JA, Leonardi R, Fasoli G, Rigamonti D. Prevalence and fatality rates of COVID-19: What are the reasons for the wide variations worldwide? *Travel medicine and infectious disease*. 2020:101711.
2. Alberti P, Beretta S, Piatti M, Karantzoulis A, Piatti ML, Santoro P, et al. Guillain-Barre syndrome related to COVID-19 infection. *Neurology(R) neuroimmunology & neuroinflammation*. 2020;7(4).
3. Balnis J, Adam AP, Chopra A, Chieng HC, Feustel PJ, Overmyer KA, et al. Higher plasma levels of Chemokine CCL19 are associated with poor SARS-CoV-2 acute respiratory distress syndrome (ARDS) outcomes. *medRxiv : the preprint server for health sciences*. 2020.
4. Barrasa H, Rello J, Tejada S, Martín A, Balziskueta G, Vinuesa C, et al. SARS-Cov-2 in Spanish Intensive Care: Early Experience with 15-day Survival In Vitoria. *Anaesthesia, critical care & pain medicine*. 2020.

- 1
  - 2
  - 3
  - 4
  - 5
  - 6
  - 7
  - 8
  - 9
  - 10
  - 11
  - 12
  - 13
  - 14
  - 15
  - 16
  - 17
  - 18
  - 19
  - 20
  - 21
  - 22
  - 23
  - 24
  - 25
  - 26
  - 27
  - 28
  - 29
  - 30
  - 31
  - 32
  - 33
  - 34
  - 35
  - 36
  - 37
  - 38
  - 39
  - 40
  - 41
  - 42
  - 43
  - 44
  - 45
  - 46
  - 47
  - 48
  - 49
  - 50
  - 51
  - 52
  - 53
  - 54
  - 55
  - 56
  - 57
  - 58
  - 59
  - 60
5. Bundschuh C, Egger M, Wiesinger K, Gabriel C, Clodi M, Mueller T, et al. Evaluation of the EDI enzyme linked immunosorbent assays for the detection of SARS-CoV-2 IgM and IgG antibodies in human plasma. *Clin Chim Acta*. 2020;509:79-82.
6. Cantador E, Núñez A, Sobrino P, Espejo V, Fabia L, Vela L, et al. Incidence and consequences of systemic arterial thrombotic events in COVID-19 patients. *J Thromb Thrombolysis*. 2020:1-5.
7. Chan L, Chaudhary K, Saha A, Chauhan K, Vaid A, Baweja M, et al. Acute Kidney Injury in Hospitalized Patients with COVID-19. *medRxiv : the preprint server for health sciences*. 2020.
8. Chatterjee A, Gerdes MW, Martinez SG. Statistical Explorations and Univariate Timeseries Analysis on COVID-19 Datasets to Understand the Trend of Disease Spreading and Death. *Sensors (Basel, Switzerland)*. 2020;20(11).
9. Chen W, Lan Y, Yuan X, Deng X, Li Y, Cai X, et al. Detectable 2019-nCoV viral RNA in blood is a strong indicator for the further clinical severity. *Emerging microbes & infections*. 2020;9(1):469-73.
10. Cheng F-Y, Joshi H, Tandon P, Freeman R, Reich DL, Mazumdar M, et al. Using Machine Learning to Predict ICU Transfer in Hospitalized COVID-19 Patients. *Journal of clinical medicine*. 2020;9(6).
11. David E, Frauke D, Luis B, Maria B, Agustin A, Pietro I, et al. The ABO blood group locus and a chromosome 3 gene cluster associate with SARS-CoV-2 respiratory failure in an Italian-Spanish genome-wide association analysis. *medRxiv*. 2020.
12. De Natale G, Ricciardi V, De Luca G, De Natale D, Di Meglio G, Ferragamo A, et al. The COVID-19 Infection in Italy: A Statistical Study of an Abnormally Severe Disease. *Journal of clinical medicine*. 2020;9(5).
13. Demelo-Rodríguez P, Cervilla-Muñoz E, Ordieres-Ortega L, Parra-Virto A, Toledano-Macías M, Toledo-Samaniego N, et al. Incidence of asymptomatic deep vein thrombosis in patients with COVID-19 pneumonia and elevated D-dimer levels. *Thromb Res*. 2020;192:23-6.
14. Dursun R, Temiz SA. The clinics of HHV-6 infection in COVID-19 pandemic: Pityriasis rosea and Kawasaki disease. *Dermatol Ther*. 2020:e13730.
15. Gautret P, Lagier J-C, Parola P, Hoang VT, Meddeb L, Sevestre J, et al. Clinical and microbiological effect of a combination of hydroxychloroquine and azithromycin in 80 COVID-19 patients with at least a six-day follow up: A pilot observational study. *Travel medicine and infectious disease*. 2020;34:101663.
16. Giudicessi JR, Roden DM, Wilde AAM, Ackerman MJ. Genetic susceptibility for COVID-19-associated sudden cardiac death in African Americans. *Heart rhythm*. 2020.
17. Goldstein MR, Poland GA, Graeber CW. Are certain drugs associated with enhanced mortality in COVID-19? *QJM : monthly journal of the Association of Physicians*. 2020.
18. Hernigou J, Cornil F, Poignard A, El Bouchaibi S, Mani J, Naouri JF, et al. Thoracic computerised tomography scans in one hundred eighteen orthopaedic patients during the

1  
2  
3 COVID-19 pandemic: identification of chest lesions; added values; help in managing patients;  
4 burden on the computerised tomography scan department. *Int Orthop*. 2020:1-10.  
5

6 19. Ihle-Hansen H, Berge T, Tveita A, Ronning EJ, Erno PE, Andersen EL, et al. COVID-19:  
7 Symptoms, course of illness and use of clinical scoring systems for the first 42 patients admitted  
8 to a Norwegian local hospital. *Covid-19: Symptomer, forlop og bruk av kliniske skaringsverktøy*  
9 *hos de 42 forste pasientene innlagt pa et norsk lokalsykehus*. 2020;140(7).  
10

11 20. Ikitimur H, Borku Uysal B, Cengiz M, Ikitimur B, Uysal H, Ozcan E, et al. "Determining  
12 Host Factors Contributing to Disease Severity in a Family Cluster of 29 Hospitalized SARS-  
13 CoV-2 Patients: Could Genetic Factors Be Relevant in the Clinical Course of COVID-19?".  
14 *Journal of medical virology*. 2020.  
15

16 21. Jain R, Young M, Dogra S, Kennedy H, Nguyen V, Raz E. Surprise Diagnosis of COVID-  
17 19 following Neuroimaging Evaluation for Unrelated Reasons during the Pandemic in Hot Spots.  
18 *AJNR Am J Neuroradiol*. 2020.  
19

20 22. Ji H-L, Zhao R, Matalon S, Matthay MA. Elevated Plasmin(ogen) as a Common Risk  
21 Factor for COVID-19 Susceptibility. *Physiological reviews*. 2020;100(3):1065-75.  
22

23 23. Kang Y, Chen T, Mui D, Ferrari V, Jagasia D, Scherrer-Crosbie M, et al. Cardiovascular  
24 manifestations and treatment considerations in covid-19. *Heart (British Cardiac Society)*. 2020.  
25

26 24. Kong Q, Xiang Z, Wu Y, Gu Y, Guo J, Geng F. Analysis of the susceptibility of lung  
27 cancer patients to SARS-CoV-2 infection. *Molecular cancer*. 2020;19(1):80.  
28

29 25. Kox M, Frenzel T, Schouten J, van de Veerdonk FL, Koenen HJPM, Pickkers P, et al.  
30 COVID-19 patients exhibit less pronounced immune suppression compared with bacterial septic  
31 shock patients. *Critical care (London, England)*. 2020;24(1):263.  
32

33 26. Kyle J, Maedeh K-K, Blake J, Larisa GT. The Association Between Angiotensin-  
34 Converting Enzyme Inhibitors and Angiotensin Receptor Blockers and the Number of Covid-19  
35 Confirmed Cases and Deaths in the United States: Geospatial Study. *medRxiv*. 2020.  
36

37 27. Lala A, Johnson KW, Russak AJ, Paranjpe I, Zhao S, Solani S, et al. Prevalence and  
38 Impact of Myocardial Injury in Patients Hospitalized with COVID-19 Infection. *medRxiv : the*  
39 *preprint server for health sciences*. 2020.  
40

41 28. Larson AS, Savastano L, Kadirvel R, Kallmes DF, Hassan AE, Brinjikji W. COVID-19  
42 and the Cerebro-Cardiovascular Systems: What do we Know so Far? *Journal of the American*  
43 *Heart Association*. 2020:e016793.  
44

45 29. Liu F, Li L, Xu M, Wu J, Luo D, Zhu Y, et al. Prognostic value of interleukin-6, C-reactive  
46 protein, and procalcitonin in patients with COVID-19. *Journal of clinical virology : the official*  
47 *publication of the Pan American Society for Clinical Virology*. 2020;127:104370.  
48

49 30. Liu Z, Jin C, Wu CC, Liang T, Zhao H, Wang Y, et al. Association between Initial Chest  
50 CT or Clinical Features and Clinical Course in Patients with Coronavirus Disease 2019  
51 Pneumonia. *Korean journal of radiology*. 2020;21(6):736-45.  
52

53 31. Lyons-Weiler J. Pathogenic Priming Likely Contributes to Serious and Critical Illness and  
54 Mortality in COVID-19 via Autoimmunity. *Journal of translational autoimmunity*. 2020:100051.  
55  
56  
57  
58  
59  
60

- 1  
2  
3 32. Mancía G, Rea F, Luderngani M, Apolone G, Corrao G. Renin-Angiotensin-Aldosterone  
4 System Blockers and the Risk of Covid-19. *The New England journal of medicine*. 2020.  
5
- 6 33. Marullo AG, Cavarretta E, Biondi-Zoccai G, Mancone M, Peruzzi M, Piscioneri F, et al.  
7 Extracorporeal membrane oxygenation for critically ill patients with coronavirus-associated  
8 disease 2019: an updated perspective of the European experience. *Minerva cardioangiologica*.  
9 2020.  
10
- 11 34. Mathew D, Giles JR, Baxter AE, Greenplate AR, Wu JE, Alanio C, et al. Deep immune  
12 profiling of COVID-19 patients reveals patient heterogeneity and distinct immunotypes with  
13 implications for therapeutic interventions. *bioRxiv : the preprint server for biology*. 2020.  
14
- 15 35. McRae MP, Simmons GW, Christodoulides NJ, Lu Z, Kang SK, Fenyo D, et al. Clinical  
16 Decision Support Tool and Rapid Point-of-Care Platform for Determining Disease Severity in  
17 Patients with COVID-19. *medRxiv : the preprint server for health sciences*. 2020.  
18
- 19 36. Mehta N, Kalra A, Nowacki AS, Anjewierden S, Han Z, Bhat P, et al. Association of Use  
20 of Angiotensin-Converting Enzyme Inhibitors and Angiotensin II Receptor Blockers With Testing  
21 Positive for Coronavirus Disease 2019 (COVID-19). *JAMA cardiology*. 2020.  
22
- 23 37. Negri E, Scarpino V, La Vecchia C. Prevalence of COVID-19-like symptoms in Italy and  
24 Lombardy, March-April 2020, and their implications on cancer prevention, diagnosis and  
25 management. *Eur J Cancer Prev*. 2020.  
26
- 27 38. Öztürk F, Karaduman M, Çoldur R, İncecik Ş, Güneş Y, Tuncer M. Interpretation of  
28 arrhythmogenic effects of COVID-19 disease through ECG. *Aging Male*. 2020:1-4.  
29
- 30 39. Park PG, Kim CH, Heo Y, Kim TS, Park CW, Kim CH. Out-of-Hospital Cohort Treatment  
31 of Coronavirus Disease 2019 Patients with Mild Symptoms in Korea: an Experience from a  
32 Single Community Treatment Center. *Journal of Korean medical science*. 2020;35(13):e140.  
33
- 34 40. Patel A, Charani E, Ariyanayagam D, Abdulaal A, Denny SJ, Mughal N, et al. New-onset  
35 anosmia and ageusia in adult patients diagnosed with SARS-CoV-2 infection. *Clin Microbiol*  
36 *Infect*. 2020.  
37
- 38 41. Pereira A, Cruz-Melguizo S, Adrien M, Fuentes L, Marin E, Perez-Medina T. Clinical  
39 course of Coronavirus Disease-2019 (COVID-19) in pregnancy. *Acta obstetrica et gynecologica*  
40 *Scandinavica*. 2020.  
41
- 42 42. Pinto BGG, Oliveira AER, Singh Y, Jimenez L, Goncalves ANA, Ogava RLT, et al. ACE2  
43 Expression is Increased in the Lungs of Patients with Comorbidities Associated with Severe  
44 COVID-19. *The Journal of infectious diseases*. 2020.  
45
- 46 43. Potdar AA, Dube S, Naito T, Botwin G, Haritunians T, Li D, et al. Reduced expression of  
47 COVID-19 host receptor, ACE2 is associated with small bowel inflammation, more severe  
48 disease, and response to anti-TNF therapy in Crohn's disease. *medRxiv : the preprint server for*  
49 *health sciences*. 2020.  
50
- 51 44. Renieris G, Katrini K, Damoulari C, Akinosoglou K, Psarrakis C, Kyriakopoulou M, et al.  
52 Serum Hydrogen Sulfide and Outcome Association in Pneumonia by the SARS-CoV-2  
53 Coronavirusxs. *Shock (Augusta, Ga)*. 2020.  
54  
55  
56  
57  
58  
59

- 1  
2  
3 45. Roschewski M, Lionakis MS, Sharman JP, Roswarski J, Goy A, Monticelli MA, et al. Inhibition of Bruton tyrosine kinase in patients with severe COVID-19. *Science immunology*. 2020;5(48).  
4  
5  
6  
7 46. Rovina N, Akinosoglou K, Eugen-Olsen J, Hayek S, Reiser J, Giamarellos-Bourboulis EJ. Soluble urokinase plasminogen activator receptor (suPAR) as an early predictor of severe respiratory failure in patients with COVID-19 pneumonia. *Critical care (London, England)*. 2020;24(1):187.  
8  
9  
10  
11  
12 47. Rubin SJS, Falkson SR, Degner NR, Blish C. Clinical characteristics associated with COVID-19 severity in California. *Journal of Clinical and Translational Science*. 2020:1-4.  
13  
14  
15 48. Sayoni D, Krystyna T, Matthew P, James K, Marcin P, Claus Erik J, et al. Identification and Analysis of Shared Risk Factors in Sepsis and High Mortality Risk COVID-19 Patients. *medRxiv*. 2020.  
16  
17  
18  
19 49. Sberna G, Amendola A, Valli MB, Carletti F, Capobianchi MR, Bordi L, et al. Trend of respiratory pathogens during the COVID-19 epidemic. *J Clin Virol*. 2020;129:104470.  
20  
21  
22 50. Shant A, Juan AR, Lei L, Carolyn T. The Association Between Biomarkers and Clinical Outcomes in Novel Coronavirus (COVID-19) Pneumonia in a U.S. Cohort. *medRxiv*. 2020.  
23  
24  
25 51. Smith-Ray R, Roberts EE, Littleton DE, Singh T, Sandberg T, Taitel M. United States distribution of patients at risk for complications related to COVID-19. *JMIR public health and surveillance*. 2020.  
26  
27  
28  
29 52. Solaimanzadeh I. Nifedipine and Amlodipine Are Associated With Improved Mortality and Decreased Risk for Intubation and Mechanical Ventilation in Elderly Patients Hospitalized for COVID-19. *Cureus*. 2020;12(5):e8069.  
30  
31  
32  
33 53. Tharakan S, Nomoto K, Miyashita S, Ishikawa K. Body temperature correlates with mortality in COVID-19 patients. *Critical care (London, England)*. 2020;24(1):298.  
34  
35  
36 54. Tobias H, III, Vindi J, Chiara A, Johannes CH, Michael B-B, Matthias K, et al. Level of IL-6 predicts respiratory failure in hospitalized symptomatic COVID-19 patients. *medRxiv*. 2020.  
37  
38  
39 55. Toubiana J, Poirault C, Corsia A, Bajolle F, Fourgeaud J, Angoulvant F, et al. Kawasaki-like multisystem inflammatory syndrome in children during the covid-19 pandemic in Paris, France: prospective observational study. *Bmj*. 2020;369:m2094.  
40  
41  
42  
43 56. Vaira LA, Deiana G, Fois AG, Pirina P, Madeddu G, De Vito A, et al. Objective evaluation of anosmia and ageusia in COVID-19 patients: Single-center experience on 72 cases. *Head & neck*. 2020;42(6):1252-8.  
44  
45  
46  
47 57. Vanni G, Materazzo M, Santori F, Pellicciaro M, Costesta M, Orsaria P, et al. The Effect of Coronavirus (COVID-19) on Breast Cancer Teamwork: A Multicentric Survey. *In Vivo*. 2020;34(3 Suppl):1685-94.  
48  
49  
50  
51 58. Wadhwa RK, Wadhwa P, Gaba P, Figueroa JF, Joynt Maddox KE, Yeh RW, et al. Variation in COVID-19 Hospitalizations and Deaths Across New York City Boroughs. *JAMA*. 2020.  
52  
53  
54  
55  
56  
57  
58  
59  
60



- 1
- 2
- 3 59. Wollenstein-Betech S, Cassandras CG, Paschalidis IC. Personalized Predictive Models
- 4 for Symptomatic COVID-19 Patients Using Basic Preconditions: Hospitalizations, Mortality, and
- 5 the Need for an ICU or Ventilator. medRxiv : the preprint server for health sciences. 2020.
- 6
- 7 60. Yadaw AS, Li Y-C, Bose S, Iyengar R, Bunyavanich S, Pandey G. Clinical predictors of
- 8 COVID-19 mortality. medRxiv : the preprint server for health sciences. 2020.
- 9
- 10 61. Zaninotto M, Mion MM, Cosma C, Rinaldi D, Plebani M. Presepsin in risk stratification of
- 11 SARS-CoV-2 patients. Clinica chimica acta; international journal of clinical chemistry.
- 12 2020;507:161-3.
- 13
- 14 62. Zietz M, Tatonetti NP. Testing the association between blood type and COVID-19
- 15 infection, intubation, and death. medRxiv : the preprint server for health sciences. 2020.
- 16
- 17 63. Zietz M, Tatonetti N. Testing the association between blood type and COVID-19
- 18 infection, intubation, and death. medRxiv : the preprint server for health sciences. 2020.
- 19
- 20
- 21

### 22 Excluded – unadjusted data (n=69)

- 23
- 24 1. Coronavirus Disease 2019 in Children - United States, February 12-April 2, 2020.
- 25 MMWR Morb Mortal Wkly Rep. 2020;69(14):422-6.
- 26
- 27 2. COVID-19, Australia: Epidemiology Report 15 (Reporting week to 23:59 AEST 10 May
- 28 2020). Commun Dis Intell (2018). 2020;44.
- 29
- 30 3. Aggarwal S, Garcia-Telles N, Aggarwal G, Lavie C, Lippi G, Henry BM. Clinical features,
- 31 laboratory characteristics, and outcomes of patients hospitalized with coronavirus disease 2019
- 32 (COVID-19): Early report from the United States. Diagnosis (Berlin, Germany). 2020;7(2):91-6.
- 33
- 34 4. Arentz M, Yim E, Klaff L, Lokhandwala S, Riedo FX, Chong M, et al. Characteristics and
- 35 Outcomes of 21 Critically Ill Patients With COVID-19 in Washington State. JAMA. 2020.
- 36
- 37 5. Argenziano MG, Bruce SL, Slater CL, Tiao JR, Baldwin MR, Barr RG, et al.
- 38 Characterization and clinical course of 1000 Patients with COVID-19 in New York: retrospective
- 39 case series. medRxiv : the preprint server for health sciences. 2020.
- 40
- 41 6. Argenziano MG, Bruce SL, Slater CL, Tiao JR, Baldwin MR, Barr RG, et al.
- 42 Characterization and clinical course of 1000 patients with coronavirus disease 2019 in New
- 43 York: retrospective case series. BMJ (Clinical research ed). 2020;369:m1996.
- 44
- 45 7. Bhopal S, Bagaria J, Bhopal R. Children's mortality from COVID-19 compared with all-
- 46 deaths and other relevant causes of death: epidemiological information for decision-making by
- 47 parents, teachers, clinicians and policymakers. Public health. 2020;185:19-20.
- 48
- 49 8. Biagi A, Rossi L, Malagoli A, Zanni A, Sticozzi C, Comastri G, et al. Clinical and
- 50 epidemiological characteristics of 320 deceased Covid-19 patients in an Italian Province: a
- 51 retrospective observational study. Journal of medical virology. 2020.
- 52
- 53 9. Blitz MJ, Grunebaum A, Tekbali A, Bornstein E, Rochelson B, Nimaroff M, et al.
- 54 Intensive care unit admissions for pregnant and nonpregnant women with coronavirus disease
- 55 2019. American journal of obstetrics and gynecology. 2020.
- 56
- 57
- 58
- 59
- 60

10. Borghesi A, Zigliani A, Masciullo R, Golemi S, Maculotti P, Farina D, et al. Radiographic severity index in COVID-19 pneumonia: relationship to age and sex in 783 Italian patients. *La Radiologia medica*. 2020;125(5):461-4.
11. Brambilla I, Castagnoli R, Caimmi S, Ciprandi G, Luigi Marseglia G. COVID-19 in the Pediatric Population Admitted to a Tertiary Referral Hospital in Northern Italy: Preliminary Clinical Data. *The Pediatric infectious disease journal*. 2020;39(7):e160.
12. Cagnacci A, Xholli A. Age-related difference in the rate of COVID-19 mortality in women versus men. *American journal of obstetrics and gynecology*. 2020.
13. Caussy C, Wallet F, Laville M, Disse E. Obesity is Associated with Severe Forms of COVID-19. *Obesity (Silver Spring, Md)*. 2020.
14. Damiani G, Pacifico A, Bragazzi NL, Malagoli P. Biologics increase the risk of SARS-CoV-2 infection and hospitalization, but not ICU admission and death: Real-life data from a large cohort during red-zone declaration. *Dermatologic therapy*. 2020:e13475.
15. DeBiasi RL, Song X, Delaney M, Bell M, Smith K, Pershad J, et al. Severe COVID-19 in Children and Young Adults in the Washington, DC Metropolitan Region. *The Journal of pediatrics*. 2020.
16. Duanmu Y, Brown IP, Gibb WR, Singh J, Matheson LW, Blomkalns AL, et al. Characteristics of Emergency Department Patients With COVID-19 at a Single Site in Northern California: Clinical Observations and Public Health Implications. *Academic emergency medicine : official journal of the Society for Academic Emergency Medicine*. 2020;27(6):505-9.
17. Easom N, Moss P, Barlow G, Samson A, Taynton T, Adams K, et al. 68 Consecutive patients assessed for COVID-19 infection; experience from a UK regional infectious disease unit. *Influenza and other respiratory viruses*. 2020.
18. Ferguson J, Rosser JL, Quintero O, Scott J, Subramanian A, Gumma M, et al. Characteristics and Outcomes of Coronavirus Disease Patients under Nonsurge Conditions, Northern California, USA, March-April 2020. *Emerging infectious diseases*. 2020;26(8).
19. Fernandez-Ruiz M, Andres A, Loinaz C, Delgado JF, Lopez-Medrano F, San Juan R, et al. COVID-19 in solid organ transplant recipients: A single-center case series from Spain. *American journal of transplantation : official journal of the American Society of Transplantation and the American Society of Transplant Surgeons*. 2020.
20. Foster CE, Moulton EA, Munoz FM, Hulten KG, Versalovic J, Dunn J, et al. Coronavirus Disease 2019 in Children Cared for at Texas Children's Hospital: Initial Clinical Characteristics and Outcomes. *Journal of the Pediatric Infectious Diseases Society*. 2020.
21. Garazzino S, Montagnani C, Dona D, Meini A, Felici E, Vergine G, et al. Multicentre Italian study of SARS-CoV-2 infection in children and adolescents, preliminary data as at 10 April 2020. *Euro surveillance : bulletin Europeen sur les maladies transmissibles = European communicable disease bulletin*. 2020;25(18).
22. Garg S, Kim L, Whitaker M, O'Halloran A, Cummings C, Holstein R, et al. Hospitalization Rates and Characteristics of Patients Hospitalized with Laboratory-Confirmed Coronavirus

- 1  
2  
3 Disease 2019 - COVID-NET, 14 States, March 1-30, 2020. *MMWR Morbidity and mortality*  
4 *weekly report.* 2020;69(15):458-64.  
5
- 6 23. Gebhard C, Regitz-Zagrosek V, Neuhauser HK, Morgan R, Klein SL. Impact of sex and  
7 gender on COVID-19 outcomes in Europe. *Biology of sex differences.* 2020;11(1):29.  
8
- 9 24. Giorgi Rossi P, Emilia-Romagna C-wg, Broccoli S, Angelini P. Case fatality rate in  
10 patients with COVID-19 infection and its relationship with length of follow up. *Journal of clinical*  
11 *virology : the official publication of the Pan American Society for Clinical Virology.*  
12 2020;128:104415.  
13
- 14 25. Gisondi P, Zaza G, Del Giglio M, Rossi M, Iacono V, Girolomoni G. Risk of  
15 hospitalization and death from COVID-19 infection in patients with chronic plaque psoriasis  
16 receiving a biologic treatment and renal transplant recipients in maintenance  
17 immunosuppressive treatment. *Journal of the American Academy of Dermatology.* 2020.  
18
- 19 26. Goker H, Aladag Karakulak E, Demiroglu H, Ayaz Ceylan CM, Buyukasik Y, Inkaya AC,  
20 et al. The effects of blood group types on the risk of COVID-19 infection and its clinical outcome.  
21 *Turkish journal of medical sciences.* 2020.  
22
- 23 27. Gold JAW, Wong KK, Szablewski CM, Patel PR, Rossow J, da Silva J, et al.  
24 *Characteristics and Clinical Outcomes of Adult Patients Hospitalized with COVID-19 - Georgia,*  
25 *March 2020. MMWR Morbidity and mortality weekly report.* 2020;69(18):545-50.  
26
- 27 28. Grasselli G, Zangrillo A, Zanella A, Antonelli M, Cabrini L, Castelli A, et al. Baseline  
28 *Characteristics and Outcomes of 1591 Patients Infected With SARS-CoV-2 Admitted to ICUs of*  
29 *the Lombardy Region, Italy. JAMA.* 2020.  
30
- 31 29. Gubatan J, Levitte S, Balabanis T, Patel A, Sharma A, Habtezion A. SARS-CoV-2  
32 *Testing, Prevalence, and Predictors of COVID-19 in Patients with Inflammatory Bowel Disease*  
33 *in Northern California. Gastroenterology.* 2020.  
34
- 35 30. Hong KS, Lee KH, Chung JH, Shin KC, Choi EY, Jin HJ, et al. Clinical Features and  
36 *Outcomes of 98 Patients Hospitalized with SARS-CoV-2 Infection in Daegu, South Korea: A*  
37 *Brief Descriptive Study. Yonsei medical journal.* 2020;61(5):431-7.  
38
- 39 31. Inciardi RM, Adamo M, Lupi L, Cani DS, Di Pasquale M, Tomasoni D, et al.  
40 *Characteristics and outcomes of patients hospitalized for COVID-19 and cardiac disease in*  
41 *Northern Italy. European heart journal.* 2020;41(19):1821-9.  
42
- 43 32. Israelsen SB, Kristiansen KT, Hindsberger B, Ulrik CS, Andersen O, Jensen M, et al.  
44 *Characteristics of patients with COVID-19 pneumonia at Hvidovre Hospital, March-April 2020.*  
45 *Danish medical journal.* 2020;67(6).  
46
- 47 33. Itelman E, Wasserstrum Y, Segev A, Avaky C, Negru L, Cohen D, et al. Clinical  
48 *Characterization of 162 COVID-19 patients in Israel: Preliminary Report from a Large Tertiary*  
49 *Center. The Israel Medical Association journal : IMAJ.* 2020;22(5):271-4.  
50
- 51 34. Kato H, Shimizu H, Shibue Y, Hosoda T, Iwabuchi K, Nagamine K, et al. Clinical course  
52 *of 2019 novel coronavirus disease (COVID-19) in individuals present during the outbreak on the*  
53 *Diamond Princess cruise ship. Journal of infection and chemotherapy : official journal of the*  
54 *Japan Society of Chemotherapy.* 2020.  
55  
56  
57  
58  
59  
60

- 1  
2  
3 35. Kayem G, Alessandrini V, Azria E, Blanc J, Bohec C, Bornes M, et al. A snapshot of the  
4 Covid-19 pandemic among pregnant women in France. *Journal of gynecology obstetrics and*  
5 *human reproduction*. 2020:101826.  
6  
7 36. Kebisek J, Forrest LJ, Maule AL, Steelman RA, Ambrose JF. Special report: Prevalence  
8 of selected underlying health conditions among active component Army service members with  
9 coronavirus disease 2019, 11 February-6 April 2020. *Msmr*. 2020;27(5):50-4.  
10  
11 37. Kim ES, Chin BS, Kang CK, Kim NJ, Kang YM, Choi JP, et al. Clinical Course and  
12 Outcomes of Patients with Severe Acute Respiratory Syndrome Coronavirus 2 Infection: a  
13 Preliminary Report of the First 28 Patients from the Korean Cohort Study on COVID-19. *Journal*  
14 *of Korean medical science*. 2020;35(13):e142.  
15  
16 38. Kim T, Park O, Yoo H, Ahn S, Jo J, Kim JW, et al. Epidemiological and Clinical  
17 Characteristics of Early 101 Deceased Patients in the Coronavirus Disease-19 (COVID-19)  
18 Outbreak in Republic of Korea. *SSRN*. 2020.  
19  
20 39. Kluytmans-van den Bergh MFQ, Buiting AGM, Pas SD, Bentvelsen RG, van den  
21 Bijllaardt W, van Oudheusden AJG, et al. Prevalence and Clinical Presentation of Health Care  
22 Workers With Symptoms of Coronavirus Disease 2019 in 2 Dutch Hospitals During an Early  
23 Phase of the Pandemic. *JAMA Netw Open*. 2020;3(5):e209673.  
24  
25 40. Kuno T, Takahashi M, Obata R, Maeda T. Cardiovascular comorbidities, cardiac injury,  
26 and prognosis of COVID-19 in New York City. *American heart journal*. 2020;226:24-5.  
27  
28 41. Latif F, Farr MA, Clerkin KJ, Habal MV, Takeda K, Naka Y, et al. Characteristics and  
29 Outcomes of Recipients of Heart Transplant With Coronavirus Disease 2019. *JAMA cardiology*.  
30 2020.  
31  
32 42. Lee J, Lee YH, Chang H-H, Choi SH, Seo H, Yoo SS, et al. Comparison of short-term  
33 mortality between mechanically ventilated patients with COVID-19 and influenza in a setting of  
34 sustainable healthcare system. *The Journal of infection*. 2020.  
35  
36 43. Lewnard JA, Liu VX, Jackson ML, Schmidt MA, Jewell BL, Flores JP, et al. Incidence,  
37 clinical outcomes, and transmission dynamics of severe coronavirus disease 2019 in California  
38 and Washington: prospective cohort study. *BMJ (Clinical research ed)*. 2020;369:m1923.  
39  
40 44. Lighter J, Phillips M, Hochman S, Sterling S, Johnson D, Francois F, et al. Obesity in  
41 patients younger than 60 years is a risk factor for Covid-19 hospital admission. *Clinical*  
42 *infectious diseases : an official publication of the Infectious Diseases Society of America*. 2020.  
43  
44 45. Manzoni P, Milillo C. Covid-19 mortality in Italian doctors. *The Journal of infection*. 2020.  
45  
46 46. Marin-Hernandez D, Schwartz RE, Nixon DF. Epidemiological evidence for association  
47 between higher influenza vaccine uptake in the elderly and lower COVID-19 deaths in Italy.  
48 *Journal of medical virology*. 2020.  
49  
50 47. Medetalibeyoglu A, Senkal N, Capar G, Kose M, Tukek T. Characteristics of the initial  
51 patients hospitalized for COVID-19: a single-center report. *Turkish journal of medical sciences*.  
52 2020.  
53  
54  
55  
56  
57  
58  
59  
60

- 1  
2  
3 48. Miyashita H, Mikami T, Chopra N, Yamada T, Chernyavsky S, Rizk D, et al. Do patients  
4 with cancer have a poorer prognosis of COVID-19? An experience in New York City. *Annals of*  
5 *oncology : official journal of the European Society for Medical Oncology*. 2020.  
6
- 7 49. Myers LC, Parodi SM, Escobar GJ, Liu VX. Characteristics of Hospitalized Adults With  
8 COVID-19 in an Integrated Health Care System in California. *JAMA*. 2020.  
9
- 10 50. Newport KB, Malhotra S, Widera E. Prognostication and Proactive Planning in COVID-  
11 19. *Journal of pain and symptom management*. 2020.  
12
- 13 51. Nowak B, Szymanski P, Pankowski I, Szarowska A, Zycinska K, Rogowski W, et al.  
14 Clinical characteristics and short-term outcomes of patients with coronavirus disease 2019: a  
15 retrospective single-center experience of a designated hospital in Poland. *Polish archives of*  
16 *internal medicine*. 2020;130(5):407-11.  
17
- 18 52. Oualha M, Bendavid M, Berteloot L, Corsia A, Lesage F, Vedrenne M, et al. Severe and  
19 fatal forms of COVID-19 in children. *Archives de pediatrie : organe officiel de la Societe*  
20 *francaise de pediatrie*. 2020.  
21
- 22 53. Paranjpe I, Russak A, De Freitas JK, Lala A, Miotto R, Vaid A, et al. Clinical  
23 Characteristics of Hospitalized Covid-19 Patients in New York City. *medRxiv : the preprint*  
24 *server for health sciences*. 2020.  
25
- 26 54. Razanamahery J, Malinowski L, Humbert S, Brunel AS, Lepiller Q, Chirouze C, et al.  
27 Predictive factors of poor outcomes in the COVID-19 epidemic: Consider the inflammatory  
28 response. *Medecine et maladies infectieuses*. 2020.  
29
- 30 55. Richardson S, Hirsch JS, Narasimhan M, Crawford JM, McGinn T, Davidson KW, et al.  
31 Presenting Characteristics, Comorbidities, and Outcomes Among 5700 Patients Hospitalized  
32 With COVID-19 in the New York City Area. *JAMA*. 2020.  
33
- 34 56. Rogado J, Pangua C, Serrano-Montero G, Obispo B, Marino AM, Perez-Perez M, et al.  
35 Covid-19 and lung cancer: A greater fatality rate? *Lung cancer (Amsterdam, Netherlands)*.  
36 2020;146:19-22.  
37
- 38 57. Russell TW, Hellewell J, Jarvis CI, van Zandvoort K, Abbott S, Ratnayake R, et al.  
39 Estimating the infection and case fatality ratio for coronavirus disease (COVID-19) using age-  
40 adjusted data from the outbreak on the Diamond Princess cruise ship, February 2020. *Euro*  
41 *surveillance : bulletin Europeen sur les maladies transmissibles = European communicable*  
42 *disease bulletin*. 2020;25(12).  
43  
44
- 45 58. Savasi VM, Parisi F, Patane L, Ferrazzi E, Frigerio L, Pellegrino A, et al. Clinical  
46 Findings and Disease Severity in Hospitalized Pregnant Women With Coronavirus Disease  
47 2019 (COVID-19). *Obstetrics and gynecology*. 2020.  
48
- 49 59. Shah SJ, Barish PN, Prasad PA, Kistler AL, Neff N, Kamm J, et al. Clinical features,  
50 diagnostics, and outcomes of patients presenting with acute respiratory illness: a comparison of  
51 patients with and without COVID-19. *medRxiv : the preprint server for health sciences*. 2020.  
52
- 53 60. Shekerdemian LS, Mahmood NR, Wolfe KK, Riggs BJ, Ross CE, McKiernan CA, et al.  
54 Characteristics and Outcomes of Children With Coronavirus Disease 2019 (COVID-19) Infection  
55 Admitted to US and Canadian Pediatric Intensive Care Units. *JAMA pediatrics*. 2020.  
56  
57

- 1  
2  
3 61. Solomon IH, Normandin E, Bhattacharyya S, Mukerji SS, Keller K, Ali AS, et al. Neuropathological Features of Covid-19. *The New England journal of medicine*. 2020.  
4  
5  
6 62. Soneji S, Beltran-Sanchez H, Yang J, Mann C. Population-Level Mortality Rates from Novel Coronavirus (COVID-19) in South Korea. *medRxiv : the preprint server for health*  
7  
8  
9  
10 63. Stroppa EM, Toscani I, Citterio C, Anselmi E, Zaffignani E, Codeluppi M, et al. Coronavirus disease-2019 in cancer patients. A report of the first 25 cancer patients in a  
11  
12  
13 western country (Italy). *Future oncology (London, England)*. 2020.  
14  
15 64. Team CC-R. Characteristics of Health Care Personnel with COVID-19 - United States, February 12-April 9, 2020. *MMWR Morbidity and mortality weekly report*. 2020;69(15):477-81.  
16  
17 65. Team CC-R. Preliminary Estimates of the Prevalence of Selected Underlying Health  
18  
19  
20  
21  
22 66. Tedeschi S, Giannella M, Bartoletti M, Trapani F, Tadolini M, Borghi C, et al. Clinical impact of renin-angiotensin system inhibitors on in-hospital mortality of patients with  
23  
24  
25  
26  
27 67. Tomlins J, Hamilton F, Gunning S, Sheehy C, Moran E, MacGowan A. Clinical features of 95 sequential hospitalised patients with novel coronavirus 2019 disease (COVID-19), the first  
28  
29  
30  
31  
32 68. Turk MA, Landes SD, Formica MK, Goss KD. Intellectual and developmental disability and COVID-19 case-fatality trends: TriNetX analysis. *Disabil Health J*. 2020:100942.  
33  
34 69. Vuagnat P, Frelaut M, Ramtohul T, Basse C, Diakite S, Noret A, et al. COVID-19 in breast cancer patients: a cohort at the Institut Curie hospitals in the Paris area. *Breast cancer research : BCR*. 2020;22(1):55.  
35  
36  
37

### 38 **Excluded – not peer reviewed/ongoing study (n=90)**

- 39  
40 1. Evaluation of the effect of oral intermediate chain triglyceride on prognosis and course of  
41  
42  
43 2. Abedi V, Olulana O, Avula V, Chaudhary D, Khan A, Shahjouei S, et al. Racial,  
44  
45  
46  
47 3. Arbeitsgemeinschaft medikamentöse T. Austrian COVID-19 Registry. *clinicaltrials.gov*.  
48  
49  
50 4. Assaf-Harofeh Medical C. Evaluating the Immune Response for COVID-19.  
51  
52  
53 5. Assistance Publique - Hôpitaux de P. Clinical Characterisation Protocol for COVID-19 in  
54  
55  
56  
57  
58  
59  
60

- 1
- 2
- 3 6. Assistance Publique - Hôpitaux de P. Prevalence and Impact of SARS-COV-2 Infection
- 4 in Pregnant Women, Fetuses and Newborns. *clinicaltrials.gov*. 2020.
- 5
- 6 7. Assistance Publique Hopitaux De M. Morbi-mortality by COVID-19 Among Homeless
- 7 People in Marseille: a Cohort Study. *clinicaltrials.gov*. 2020.
- 8
- 9 8. Austral University A. Liver Injury in Patients With COVID-19. *clinicaltrials.gov*. 2020.
- 10
- 11 9. Aveni F. CORONA: A Study Using DeltaRex-G Gene Therapy for Symptomatic COVID-
- 12 19. *clinicaltrials.gov*. 2020.
- 13
- 14 10. Azienda Usl di B. Risk Factors for Prolonged Invasive Mechanical Ventilation in COVID-
- 15 19 Acute Respiratory Distress Syndrome. *clinicaltrials.gov*. 2020.
- 16
- 17 11. Central Hospital NF. imPROving prenaTal carE During ConfinemenT. *clinicaltrials.gov*.
- 18 2020.
- 19
- 20 12. Central Hospital NF. Obesity and Mortality of Critically Ill Patients With COVID-19.
- 21 *clinicaltrials.gov*. 2020.
- 22
- 23 13. Centre Hospitalier Universitaire de N. Analysis of the Coagulopathy Developed by
- 24 COVID-19 Infected Patients. *clinicaltrials.gov*. 2020.
- 25
- 26 14. Centre Hospitalier Universitaire de Saint E. Prediction of Clinical Course in COVID19
- 27 Patients. *clinicaltrials.gov*. 2020.
- 28
- 29 15. Complejo Hospitalario Universitario de A. Clinical-epidemiological Characterization of
- 30 COVID-19 Disease in Hospitalized Older Adults. *clinicaltrials.gov*. 2020.
- 31
- 32 16. Cyrus E, Clarke R, Hadley D, Bursac Z, Trepka MJ, Devieux JG, et al. The impact of
- 33 COVID-19 on African American communities in the United States. *medRxiv : the preprint server*
- 34 *for health sciences*. 2020.
- 35
- 36 17. Direction Centrale du Service de Santé des A. Study of Clinical and Immune Severity
- 37 Profiles of Patients Infected With SARS-Cov2 (COVID-19). *clinicaltrials.gov*. 2020.
- 38
- 39 18. Federation Francophone de Cancerologie D. The GCO-002 CACOVID-19 Cohort: a
- 40 French Nationwide Multicenter Study of COVID-19 Infected Cancer Patients. *clinicaltrials.gov*.
- 41 2020.
- 42
- 43 19. Federico IU. Clinical Characteristics of Coronavirus Disease 2019 (COVID-19) in
- 44 Pregnancy: The Italian Registry on Coronavirus in Pregnancy. *clinicaltrials.gov*. 2020.
- 45
- 46 20. Fondazione per la Ricerca Ospedale M. Myeloproliferative Neoplasms (MPN) and
- 47 COVID-19. *clinicaltrials.gov*. 2020.
- 48
- 49 21. French Cardiology S. COVID-19 in Cardiology Unit in France : Risk Factors for Mortality
- 50 (CCF). *clinicaltrials.gov*. 2020.
- 51
- 52 22. Fundación Pública Andaluza para la gestión de la Investigación en S. Multicentric Study
- 53 of Coronavirus Disease 2019 (COVID-2019) in Solid Organ Transplant Recipients.
- 54 *clinicaltrials.gov*. 2020.
- 55
- 56
- 57
- 58
- 59
- 60

23. Groupe Hospitalier Paris S-J. A randomized trial of efficacy and safety of an early outpatient treatment of COVID-19 in patients with risk factor for poor outcome : a strategy to prevent hospitalization : OUTCOV Study. EU Clinical Trials Register. 2020.
24. Guha A, Bonsu J, Dey A, Addison D. Community and Socioeconomic Factors Associated with COVID-19 in the United States: Zip code level cross sectional analysis. medRxiv : the preprint server for health sciences. 2020.
25. Gustave Roussy CCGP. Epidemiology of SARS-CoV-2 and Mortality to Covid19 Disease in French Cancer Patients. clinicaltrials.gov. 2020.
26. Hamer M, Kivimaki M, Gale CR, Batty GD. Lifestyle Risk Factors for Cardiovascular Disease in Relation to COVID-19 Hospitalization: A Community-Based Cohort Study of 387,109 Adults in UK. medRxiv : the preprint server for health sciences. 2020.
27. Hasselt U. Changes in Cardiac and Pulmonary Hemodynamics as Predictor of Outcome in Hospitalized COVID-19 Patients. clinicaltrials.gov. 2020.
28. Hepatopancreatobiliary Surgery Institute of Gansu P. COVID-19 in Patients With Pre-existing Cirrhosis (COVID-Cirrhosis-CHESS2002): A Multicentre Observational Study. clinicaltrials.gov. 2020.
29. Hospices Civils de L. Prediction of Unfavourable Outcome in Newly Covid-19 Hospitalized Patient. clinicaltrials.gov. 2019.
30. Hospital Clinic of B. COVID-19 in Liver Transplant Recipients. clinicaltrials.gov. 2020.
31. Hospital de M. Prevalence and Risk Factors of SARS-CoV-2 Antibody Responses. clinicaltrials.gov. 2020.
32. Hospital General Universitario Morales M. NIV and CPAP Failure Predictors in COVID-19 Associated Respiratory Failure. clinicaltrials.gov. 2020.
33. Imperial College L. A global registry of women affected by COVID-19 in pregnancy and their babies, to guide treatment and prevention. isrctn.com. 2020.
34. Istituto Auxologico I. Predictors of Cardiovascular Risk in Covid-19 Patients During Acute Disease and at Short Term Follow-up. clinicaltrials.gov. 2020.
35. Istituto Nazionale di Ricovero e Cura per A. Clinical and Biological Predictors of COVID-19 Disease in Older Patients. clinicaltrials.gov. 2020.
36. Jean R, Matthaios P-O, Raphael B, Paraskevas F, Jonathan T, Florian D, et al. Epidemiology, risk factors and clinical course of SARS-CoV-2 infected patients in a Swiss university hospital: an observational retrospective study. medRxiv. 2020.
37. Jonsson Comprehensive Cancer C. Role of Children in Transmission of COVID-19 to Immunocompromised Patients. clinicaltrials.gov. 2020.
38. Kanuni Sultan Suleyman T, Research H. Prognosis in Pregnant With COVID-19. clinicaltrials.gov. 2020.
39. Kanuni Sultan Suleyman T, Research H. D-dimer Levels in Pregnant With COVID-19. clinicaltrials.gov. 2020.



- 1
- 2
- 3 40. Karolinska I. Cardiovascular Risk Factors and Severe COVID-19. A Nationwide
- 4 Registry-based Case-Control Study. *clinicaltrials.gov*. 2020.
- 5
- 6 41. Lassale C, Gaye B, Hamer M, Gale CR, Batty GD. Ethnic Disparities in Hospitalization
- 7 for COVID-19: a Community-Based Cohort Study in the UK. *medRxiv : the preprint server for*
- 8 *health sciences*. 2020.
- 9
- 10 42. Lindsay K, Shikha G, Alissa OH, Michael W, Huong P, Evan JA, et al. Interim Analysis of
- 11 Risk Factors for Severe Outcomes among a Cohort of Hospitalized Adults Identified through the
- 12 U.S. Coronavirus Disease 2019 (COVID-19)-Associated Hospitalization Surveillance Network
- 13 (COVID-NET). *medRxiv*. 2020.
- 14
- 15 43. Mario Negri Institute for Pharmacological R. Early CPAP in COVID Patients With
- 16 Respiratory Failure. A Prospective Cohort Study. *clinicaltrials.gov*. 2020.
- 17
- 18 44. Mayo C. Risks of COVID19 in the Pregnant Population. *clinicaltrials.gov*. 2020.
- 19
- 20 45. Millett GA, Jones AT, Benkeser D, Baral S, Mercer L, Beyrer C, et al. Assessing
- 21 Differential Impacts of COVID-19 on Black Communities. *Annals of epidemiology*. 2020.
- 22
- 23 46. National, Kapodistrian University of A. The GReek Study in the Effects of Colchicine in
- 24 Covid-19. *clinicaltrials.gov*. 2020.
- 25
- 26 47. National Research Center for Hematology R. Observational Prospective Cohort Study -
- 27 Registry of Patients With Hematologic Disease and COVID-19 in Russia. *clinicaltrials.gov*. 2020.
- 28
- 29 48. Nayak A, Islam SJ, Mehta A, Ko Y-A, Patel SA, Goyal A, et al. Impact of Social
- 30 Vulnerability on COVID-19 Incidence and Outcomes in the United States. *medRxiv : the preprint*
- 31 *server for health sciences*. 2020.
- 32
- 33 49. Neuromed I. ACE Inhibitors, Angiotensin II Type-I Receptor Blockers and Severity of
- 34 COVID-19. *clinicaltrials.gov*. 2020.
- 35
- 36 50. ObvioHealth. A COVID-19 Symptom, Exposure and Immune Response Registry.
- 37 *clinicaltrials.gov*. 2020.
- 38
- 39 51. Oslo University H. Prospective Quality Register of Patients With Confirmed Covid-19 at
- 40 Oslo University Hospital. *clinicaltrials.gov*. 2020.
- 41
- 42 52. Oslo University H. Risk Factors for Community- and Workplace Transmission of COVID-
- 43 19. *clinicaltrials.gov*. 2020.
- 44
- 45 53. Patricio S, Hiram C. COVID-19 Fatality and Comorbidity Risk Factors among Confirmed
- 46 Patients in Mexico. *medRxiv*. 2020.
- 47
- 48 54. Pitié-Salpêtrière H. Prevalence and Seroconversion of COVID-19 in Autoimmune
- 49 Diseases in Europe. *clinicaltrials.gov*. 2020.
- 50
- 51 55. Pregistry. Health and Wellbeing of Pregnant and Post-Partum Women During the
- 52 COVID-19 Pandemic. *clinicaltrials.gov*. 2020.
- 53
- 54 56. Ramlall V, Thangaraj P, Tatonetti NP, Shapira SD. Identification of Immune complement
- 55 function as a determinant of adverse SARS-CoV-2 infection outcome. *medRxiv : the preprint*
- 56 *server for health sciences*. 2020.
- 57
- 58
- 59
- 60

- 1  
2  
3 57. Region V. Observational Cohort Study of Critically Ill Patients With Covid-19 in Sweden. clinicaltrials.gov. 2020.
- 4  
5  
6 58. Rentsch CT, Kidwai-Khan F, Tate JP, Park LS, King JT, Skanderson M, et al. Covid-19  
7 by Race and Ethnicity: A National Cohort Study of 6 Million United States Veterans. medRxiv :  
8 the preprint server for health sciences. 2020.
- 9  
10 59. Rentsch CT, Kidwai-Khan F, Tate JP, Park LS, King JT, Skanderson M, et al. Covid-19  
11 Testing, Hospital Admission, and Intensive Care Among 2,026,227 United States Veterans  
12 Aged 54-75 Years. medRxiv : the preprint server for health sciences. 2020.
- 13  
14 60. Rigshospitalet D. COVID-19 Surveillance of Patients and Healthcare Workers in a  
15 Hospital Department. clinicaltrials.gov. 2020.
- 16  
17 61. Rutgers TSUoNJ. Rutgers COVID-19 Cohort Study. clinicaltrials.gov. 2020.
- 18  
19 62. Spanish Lung Cancer G. Lung cancer Patients with COVID-19 Disease (GRAVID).  
20 clinicaltrials.gov. 2020.
- 21  
22 63. St. Jude Children's Research H. Risk Factors, Clinical Characteristics and Outcomes of  
23 Acute Infection With Coronavirus 2019 (COVID-19) In Children. clinicaltrials.gov. 2020.
- 24  
25 64. Szeged U. Identification of Genetic Factors Determining Disease Course in the New  
26 Type of Coronavirus Infection, COVID-19. clinicaltrials.gov. 2020.
- 27  
28 65. Universidade do P. Quality of Life and Patient-centered Outcomes After UCI Admission  
29 for COVID-19. clinicaltrials.gov. 2020.
- 30  
31 66. University Hospital A. COVID-19 in Hospitalised Norwegian Children - Risk Factors,  
32 Outcomes and Immunology. clinicaltrials.gov. 2020.
- 33  
34 67. University Hospital BS. A Systems Approach to Predict the Outcome of SARS-CoV-2 in  
35 the Population of a City. clinicaltrials.gov. 2020.
- 36  
37 68. University Hospital E. Characterization of Cardiovascular Diseases and Risk Factors in  
38 Patients With Suspected SARS-CoV2/Covid-19 Infection. clinicaltrials.gov. 2020.
- 39  
40 69. University Hospital G. Predict Adverse Events by Covid-19 Nephritis. clinicaltrials.gov.  
41 2020.
- 42  
43 70. University Hospital G. Risk Factors Worsening COVID19 for Out-patient With Home  
44 Monitoring. clinicaltrials.gov. 2020.
- 45  
46 71. University Hospital L. Association Between BMI and SARS-CoV-2. clinicaltrials.gov.  
47 2020.
- 48  
49 72. University Hospital L. Covid-19 in Patients With Chronic Inflammatory Rheumatism,  
50 Auto-immune or Auto-inflammatory Rare and Non-rare Diseases. clinicaltrials.gov. 2020.
- 51  
52 73. University Hospital SF. Solid Organ Transplant Recipients With Covid-19 French  
53 Registry. clinicaltrials.gov. 2020.
- 54  
55 74. University Hospital SF. Study of Hemostasis in Case of Severe COVID-19.  
56 clinicaltrials.gov. 2020.
- 57  
58  
59  
60

- 1
- 2
- 3 75. University Hospital T. Assessment of Obstetric, Fetal and Neonatal Risks and Vertical
- 4 SARS-CoV-2 Transmission During COVID-19 Pandemic. *clinicaltrials.gov*. 2020.
- 5
- 6 76. University Hospital T. Evaluation of the COVID-19 Infection Response in Patients
- 7 Admitted to the Emergency Department for Dyspnea. *clinicaltrials.gov*. 2020.
- 8
- 9 77. University of M. International SARS-CoV-2 (COVID-19) Infection Observational Study.
- 10 *clinicaltrials.gov*. 2020.
- 11
- 12 78. University of M-C. COVID-19 in Patients With HIV. *clinicaltrials.gov*. 2020.
- 13
- 14 79. University of Milano B. Predictive Factors COVID-19 Patients. *clinicaltrials.gov*. 2020.
- 15
- 16 80. University of O. Neonatal Complications of Coronavirus Disease (COVID-19).
- 17 *clinicaltrials.gov*. 2020.
- 18
- 19 81. University of O. UKOSS: Pandemic COVID-19 in pregnancy. *isrctn.com*. 2020.
- 20
- 21 82. University of Sao Paulo General H. Characteristics and Outcomes of Patients With
- 22 COVID-19 Admitted to the ICU. *clinicaltrials.gov*. 2020.
- 23
- 24 83. University of V. Longitudinal COVID-19 Cohort Study. *clinicaltrials.gov*. 2020.
- 25
- 26 84. University of Z. The Global PCHF-COVICAV Registry. *clinicaltrials.gov*. 2020.
- 27
- 28 85. University of Z. SARS-CoV-2 Associated Respiratory Failure Recovery (COVID-19
- 29 CAir). *clinicaltrials.gov*. 2020.
- 30
- 31 86. Uppsala U. COVID-19 in the Swedish ICU-cohort: Risk Factors of Critical Care
- 32 Admission and Intensive Care Mortality. *clinicaltrials.gov*. 2020.
- 33
- 34 87. Utrecht UMC. European Study of Major Infectious Disease Syndromes Related to
- 35 COVID-19. *clinicaltrials.gov*. 2020.
- 36
- 37 88. Vastra Gotaland R. COVID-19 Research in Organ Transplant Recipients.
- 38 *clinicaltrials.gov*. 2020.
- 39
- 40 89. Verily Life Sciences LLC. Predictors of Severe COVID-19 Outcomes. *clinicaltrials.gov*.
- 41 2020.
- 42
- 43 90. Vivek R. Cardiac Arrhythmias In Patients With Coronavirus Disease (COVID-19).
- 44 *clinicaltrials.gov*. 2020.

#### 45 **Excluded – not primary research study (n=175)**

- 46 1. Addeo A, Obeid M, Friedlaender A. COVID-19 and lung cancer: risks, mechanisms and
- 47 treatment interactions. *Journal for immunotherapy of cancer*. 2020;8(1).
- 48
- 49 2. Aggarwal G, Cheruiyot I, Aggarwal S, Wong J, Lippi G, Lavie CJ, et al. Association of
- 50 Cardiovascular Disease With Coronavirus Disease 2019 (COVID-19) Severity: A Meta-Analysis.
- 51 *Current problems in cardiology*. 2020;45(8):100617.
- 52
- 53 3. Aksit E, Kirilmaz B, Gazi E, Aydin F. Ticagrelor Can Be an Important Agent in the
- 54 Treatment of Severe COVID-19 Patients with Myocardial Infarction. *Balkan medical journal*.
- 55 2020;37(4):233-.
- 56
- 57
- 58
- 59
- 60

- 1  
2  
3 4. Alpalhao M, Filipe P. Inpatient care for dermatological patients during SARS-CoV-2 - a  
4 case report from Portugal. *International journal of dermatology*. 2020;59(6):e195.  
5
- 6 5. Ambrosi P. Comment on "Epidemiological and clinical characteristics of heart transplant  
7 recipients during the 2019 coronavirus outbreak in Wuhan, China" by Ren et al. *The Journal of*  
8 *heart and lung transplantation : the official publication of the International Society for Heart*  
9 *Transplantation*. 2020.  
10
- 11 6. Ambrosino I, Barbagelata E, Ortona E, Ruggieri A, Massiah G, Giannico OV, et al.  
12 Gender differences in patients with COVID-19: a narrative review. *Monaldi archives for chest*  
13 *disease = Archivio Monaldi per le malattie del torace*. 2020;90(2).  
14
- 15 7. Andre N, Rouger-Gaudichon J, Brethon B, Phulpin A, Thebault E, Pertuisel S, et al.  
16 COVID-19 in pediatric oncology from French pediatric oncology and hematology centers: High  
17 risk of severe forms? *Pediatric blood & cancer*. 2020;67(7):e28392.  
18
- 19 8. Andrew M, Searle SD, McElhaney JE, McNeil SA, Clarke B, Rockwood K, et al. COVID-  
20 19, frailty and long-term care: Implications for policy and practice. *Journal of infection in*  
21 *developing countries*. 2020;14(5):428-32.  
22
- 23 9. Anonymous. Registries Offer Insights on COVID-19-Cancer Connection. *Cancer*  
24 *discovery*. 2020.  
25
- 26 10. Anonymous. Clinical characteristics of 113 deceased patients with coronavirus disease  
27 2019: retrospective study. *BMJ (Clinical research ed)*. 2020;368:m1295.  
28
- 29 11. Anonymous. Clinical findings in a group of patients infected with the 2019 novel  
30 coronavirus (SARS-Cov-2) outside of Wuhan, China: retrospective case series. *BMJ (Clinical*  
31 *research ed)*. 2020;368:m792.  
32
- 33 12. Anugwom CM, Aby ES, Debes JD. Inverse association between chronic hepatitis B  
34 infection and COVID-19: immune-exhaustion or coincidence? *Clinical infectious diseases : an*  
35 *official publication of the Infectious Diseases Society of America*. 2020.  
36
- 37 13. Arachchilage DRJ, Laffan M. Abnormal coagulation parameters are associated with  
38 poor prognosis in patients with novel coronavirus pneumonia. *Journal of thrombosis and*  
39 *haemostasis : JTH*. 2020;18(5):1233-4.  
40
- 41 14. Archie SR, Cucullo L. Cerebrovascular and Neurological Dysfunction under the Threat of  
42 COVID-19: Is There a Comorbid Role for Smoking and Vaping? *International journal of*  
43 *molecular sciences*. 2020;21(11).  
44
- 45 15. Arnold C. Shielded from harm. *New scientist (1971)*. 2020;246(3281):28-33.  
46
- 47 16. Aydemir D, Ulusu NN. Is glucose-6-phosphate dehydrogenase enzyme deficiency a  
48 factor in Coronavirus-19 (COVID-19) infections and deaths? *Pathogens and global health*.  
49 2020;114(3):109-10.  
50
- 51 17. Baracchini C, Pieroni A, Kneihsl M, Azevedo E, Diomedi M, Pascazio L, et al. Practice  
52 recommendations for the neurovascular ultrasound investigations of acute stroke patients in the  
53 setting of COVID-19 pandemic: an expert consensus from the European Society of  
54 Neurosonology and Cerebral Hemodynamics. *European journal of neurology*. 2020.  
55  
56  
57  
58  
59

18. Barbieri L, Talavera Urquijo E, Parise P, Nilsson M, Reynolds JV, Rosati R. Esophageal oncologic surgery in SARS-CoV-2 (COVID-19) emergency. *Diseases of the esophagus : official journal of the International Society for Diseases of the Esophagus*. 2020;33(5).
19. Barchetta I, Cavallo MG, Baroni MG. COVID-19 and diabetes: Is this association driven by the DPP4 receptor? Potential clinical and therapeutic implications. *Diabetes research and clinical practice*. 2020;163:108165.
20. Bartsch SM, Ferguson MC, McKinnell JA, O'Shea KJ, Wedlock PT, Siegmund SS, et al. The Potential Health Care Costs And Resource Use Associated With COVID-19 In The United States. *Health affairs (Project Hope)*. 2020;39(6):927-35.
21. Bhidayasiri R, Virameteekul S, Kim J-M, Pal PK, Chung S-J. COVID-19: An Early Review of Its Global Impact and Considerations for Parkinson's Disease Patient Care. *Journal of movement disorders*. 2020;13(2):105-14.
22. Bombardini T, Picano E. Angiotensin-Converting Enzyme 2 as the Molecular Bridge Between Epidemiologic and Clinical Features of COVID-19. *The Canadian journal of cardiology*. 2020;36(5):784.e1-.e2.
23. Bonow RO, Fonarow GC, O'Gara PT, Yancy CW. Association of Coronavirus Disease 2019 (COVID-19) With Myocardial Injury and Mortality. *JAMA cardiology*. 2020.
24. Bornstein SR, Dalan R, Hopkins D, Mingrone G, Boehm BO. Endocrine and metabolic link to coronavirus infection. *Nature reviews Endocrinology*. 2020;16(6):297-8.
25. Bradbury RS, Piedrafita D, Greenhill A, Mahanty S. Will helminth co-infection modulate COVID-19 severity in endemic regions? *Nature reviews Immunology*. 2020;20(6):342.
26. Brunetti O, Derakhshani A, Baradaran B, Galvano A, Russo A, Silvestris N. COVID-19 Infection in Cancer Patients: How Can Oncologists Deal With These Patients? *Frontiers in oncology*. 2020;10:734.
27. Cafarotti S. Severe Acute Respiratory Syndrome-Coronavirus-2 Infection and Patients With Lung Cancer: The Potential Role of Interleukin-17 Target Therapy. *Journal of thoracic oncology : official publication of the International Association for the Study of Lung Cancer*. 2020.
28. Calvo C, Lopez-Hortelano MG, Vicente JCdC, Martinez JLV, Grupo de trabajo de la Asociacion Espanola de Pediatria para el brote de infeccion por Coronavirus cceMdS. Recommendations on the clinical management of the COVID-19 infection by the <> SARS-CoV2. Spanish Paediatric Association working group. *Anales de pediatria*. 2020.
29. Carbillon L, Benbara A, Boujenah J. Clinical course of COVID-19 in patients with systemic lupus erythematosus under long-term treatment with hydroxychloroquine. *Annals of the rheumatic diseases*. 2020.
30. Castagnoli R, Votto M, Licari A, Brambilla I, Bruno R, Perlini S, et al. Severe Acute Respiratory Syndrome Coronavirus 2 (SARS-CoV-2) Infection in Children and Adolescents: A Systematic Review. *JAMA pediatrics*. 2020.

- 1  
2  
3 31. Castro-Rodriguez JA, Forno E. Asthma and COVID-19 in children - a systematic review  
4 and call for data. medRxiv : the preprint server for health sciences. 2020.  
5
- 6 32. Ceriello A, De Nigris V, Prattichizzo F. Why is hyperglycemia worsening COVID-19 and  
7 its prognosis? Diabetes, obesity & metabolism. 2020.  
8
- 9 33. Chaturvedi R, Gabriel RA. COVID-19 Healthcare Delivery Impact on African Americans.  
10 Disaster medicine and public health preparedness. 2020:1-8.  
11
- 12 34. Chen J, Lu H, Melino G, Boccia S, Piacentini M, Ricciardi W, et al. COVID-19 infection:  
13 the China and Italy perspectives. Cell death & disease. 2020;11(6):438.  
14
- 15 35. Chidini G, Villa C, Calderini E, Marchisio P, De Luca D. SARS-CoV-2 Infection in a  
16 Pediatric Department in Milan: A Logistic Rather Than a Clinical Emergency. The Pediatric  
17 infectious disease journal. 2020;39(6):e79-e80.  
18
- 19 36. Chou R, Dana T, Buckley DI, Selph S, Fu R, Totten AM. Update Alert: Epidemiology of  
20 and Risk Factors for Coronavirus Infection in Health Care Workers. Annals of internal medicine.  
21 2020.  
22
- 23 37. Cinti S, Graciotti L, Giordano A, Valerio A, Nisoli E. COVID-19 and fat embolism: a  
24 hypothesis to explain the severe clinical outcome in people with obesity. International journal of  
25 obesity (2005). 2020.  
26
- 27 38. Cole SA, Laviada-Molina HA, Serres-Perales JM, Rodriguez-Ayala E, Bastarrachea RA.  
28 The COVID-19 Pandemic during the Time of the Diabetes Pandemic: Likely Fraternal Twins?  
29 Pathogens (Basel, Switzerland). 2020;9(5).  
30
- 31 39. Colombo C, Burgel P-R, Gartner S, van Koningsbruggen-Rietschel S, Naehrlich L,  
32 Sermet-Gaudelus I, et al. Impact of COVID-19 on people with cystic fibrosis. The Lancet  
33 Respiratory medicine. 2020;8(5):e35-e6.  
34
- 35 40. Cook DJ, Marshall JC, Fowler RA. Critical Illness in Patients With COVID-19: Mounting  
36 an Effective Clinical and Research Response. JAMA. 2020.  
37
- 38 41. Coppell KJ, Hall RM, Downie M, Fraser SK, Garrett M, Jefferies CA, et al. Diabetes and  
39 COVID-19-the meeting of two pandemics: what are the concerns? The New Zealand medical  
40 journal. 2020;133(1514):85-7.  
41
- 42 42. Costa L, Tasso M, Scotti N, Mostacciolo E, Girolimetto N, Foglia F, et al.  
43 Telerheumatology in COVID-19 era: a study from a psoriatic arthritis cohort. Annals of the  
44 rheumatic diseases. 2020.  
45
- 46 43. Cruz AT, Zeichner SL. COVID-19 in Children: Initial Characterization of the Pediatric  
47 Disease. Pediatrics. 2020.  
48
- 49 44. Daccord C, Touilloux B, Von Garnier C. [Asthma and COPD management during the  
50 COVID-19 pandemic]. Prise en charge de l'asthme et de la BPCO en situation de pandémie de  
51 COVID-19. 2020;16(692):933-8.  
52
- 53 45. De Felice F, Polimeni A, Tombolini V. The impact of Coronavirus (COVID-19) on head  
54 and neck cancer patients' care. Radiotherapy and oncology : journal of the European Society for  
55 Therapeutic Radiology and Oncology. 2020;147:84-5.  
56  
57  
58  
59

- 1
- 2
- 3 46. Delanghe JR, De Buyzere ML, Speeckaert MM. C3 and ACE1 polymorphisms are more
- 4 important confounders in the spread and outcome of COVID-19 in comparison with ABO
- 5 polymorphism. *European journal of preventive cardiology*. 2020;2047487320931305.
- 6
- 7 47. Di Lorenzo G, Di Trolio R. Coronavirus Disease (COVID-19) in Italy: Analysis of Risk
- 8 Factors and Proposed Remedial Measures. *Frontiers in medicine*. 2020;7:140.
- 9
- 10 48. Di Stadio A, Ricci G, Greco A, de Vincentiis M, Ralli M. Mortality rate and gender
- 11 differences in COVID-19 patients dying in Italy: A comparison with other countries. *European*
- 12 *review for medical and pharmacological sciences*. 2020;24(8):4066-7.
- 13
- 14 49. Dietz W, Santos-Burgoa C. Obesity and its Implications for COVID-19 Mortality. *Obesity*
- 15 *(Silver Spring, Md)*. 2020;28(6):1005.
- 16
- 17 50. Emparan JPO, Sardi-Correa C, López-Ulloa JA, Viteri-Soria J, Penniecook JA, Jimenez-
- 18 Román J, et al. COVID-19 and the eye: how much do we really know? A best evidence review.
- 19 *Arq Bras Oftalmol*. 2020;83(3):250-61.
- 20
- 21 51. Extance A. Covid-19 and long term conditions: what if you have cancer, diabetes, or
- 22 chronic kidney disease? *BMJ (Clinical research ed)*. 2020;368:m1174.
- 23
- 24 52. Faconti L, Chowienczyk PJ, Shah AM. Cardiovascular disease, heart failure and COVID-
- 25 19. *Journal of the renin-angiotensin-aldosterone system : JRAAS*.
- 26 2020;21(2):1470320320926903.
- 27
- 28 53. Fahd Al-Muhanna A. COVID-19: Impact and challenges at breast imaging unit. *The*
- 29 *breast journal*. 2020.
- 30
- 31 54. Fan BE, Chong VCL, Chan SSW, Lim GH, Lim KGE, Tan GB, et al. Hematologic
- 32 parameters in patients with COVID-19 infection. *American journal of hematology*.
- 33 2020;95(6):E131-E4.
- 34
- 35 55. Fan J, Wang H, Ye G, Cao X, Xu X, Tan W, et al. Low-density lipoprotein is a potential
- 36 predictor of poor prognosis in patients with coronavirus disease 2019. *Metabolism: clinical and*
- 37 *experimental*. 2020:154243.
- 38
- 39 56. Fruhbeck G, Baker JL, Busetto L, Dicker D, Goossens GH, Halford JCG, et al. European
- 40 Association for the Study of Obesity Position Statement on the Global COVID-19 Pandemic.
- 41 *Obesity facts*. 2020;13(2):292-6.
- 42
- 43 57. Gabutti G, d'Anchera E, Sandri F, Savio M, Stefanati A. Coronavirus: Update Related to
- 44 the Current Outbreak of COVID-19. *Infectious diseases and therapy*. 2020.
- 45
- 46 58. George PM, Wells AU, Jenkins RG. Pulmonary fibrosis and COVID-19: the potential role
- 47 for antifibrotic therapy. *The Lancet Respiratory medicine*. 2020.
- 48
- 49 59. Giannakoulis VG, Papoutsis E, Siempos II. Effect of Cancer on Clinical Outcomes of
- 50 Patients With COVID-19: A Meta-Analysis of Patient Data. *JCO global oncology*. 2020;6:799-
- 51 808.
- 52
- 53 60. Golemi Minga I, Golemi L, Tafur A, Pursnani A. The Novel Coronavirus Disease
- 54 (COVID-19) and Its Impact on Cardiovascular Disease. *Cardiology in review*. 2020;28(4):163-
- 55 76.
- 56
- 57
- 58
- 59
- 60

- 1  
2  
3 61. Goyal P, Choi JJ, Pinheiro LC, Schenck EJ, Chen R, Jabri A, et al. Clinical  
4 Characteristics of Covid-19 in New York City. *The New England journal of medicine*.  
5 2020;382(24):2372-4.  
6
- 7 62. Gracia-Ramos AE. Is the ACE2 Overexpression a Risk Factor for COVID-19 Infection?  
8 *Archives of medical research*. 2020;51(4):345-6.  
9
- 10 63. Grandi G, Facchinetti F, Bitzer J. The gendered impact of coronavirus disease (COVID-  
11 19): do estrogens play a role? *The European journal of contraception & reproductive health care*  
12 : the official journal of the European Society of Contraception. 2020:1-2.  
13
- 14 64. Griffin S. Covid-19: "Staggering number" of extra deaths in community is not explained  
15 by covid-19. *BMJ (Clinical research ed)*. 2020;369:m1931.  
16
- 17 65. Hamed E, Abd Elhamid M, Alemrayat B. Suspected cases of COVID-19: study protocol  
18 for reporting characteristics and the outcomes. *Family medicine and community health*.  
19 2020;8(2).  
20
- 21 66. Hanff TC, Harhay MO, Brown TS, Cohen JB, Mohareb AM. Is There an Association  
22 Between COVID-19 Mortality and the Renin-Angiotensin System-a Call for Epidemiologic  
23 Investigations. *Clinical infectious diseases : an official publication of the Infectious Diseases*  
24 *Society of America*. 2020.  
25
- 26 67. Henry BM, Lippi G. Chronic kidney disease is associated with severe coronavirus  
27 disease 2019 (COVID-19) infection. *International urology and nephrology*. 2020;52(6):1193-4.  
28
- 29 68. Hernandez-Huerta D, Alonso-Sanchez EB, Carrajo-Garcia CA, Montes-Rodriguez JM.  
30 The impact of COVID-19 on acute psychiatric inpatient unit. *Psychiatry research*.  
31 2020;290:113107.  
32
- 33 69. Huang G, Kovalic AJ, Graber CJ. Prognostic Value of Leukocytosis and Lymphopenia  
34 for Coronavirus Disease Severity. *Emerging infectious diseases*. 2020;26(8).  
35
- 36 70. Huang I, Pranata R. Lymphopenia in severe coronavirus disease-2019 (COVID-19):  
37 systematic review and meta-analysis. *Journal of intensive care*. 2020;8:36.  
38
- 39 71. Iacobucci G. Covid-19: Care home deaths in England and Wales double in four weeks.  
40 *BMJ (Clinical research ed)*. 2020;369:m1612.  
41
- 42 72. Ingravallo F. Death in the era of the COVID-19 pandemic. *The Lancet Public health*.  
43 2020;5(5):e258.  
44
- 45 73. Ji Y, Ma Z, Peppelenbosch MP, Pan Q. Potential association between COVID-19  
46 mortality and health-care resource availability. *The Lancet Global health*. 2020;8(4):e480.  
47
- 48 74. Jj S, N A, E G. Active smoking and severity of coronavirus disease 2019 (COVID-19):  
49 Differences in measurement of variables could cause errors in the results. *European journal of*  
50 *internal medicine*. 2020.  
51
- 52 75. Katulanda P, Dissanayake HA, Ranathunga I, Ratnasamy V, Wijewickrama PSA,  
53 Yogendranathan N, et al. Prevention and management of COVID-19 among patients with  
54 diabetes: an appraisal of the literature. *Diabetologia*. 2020:1-13.  
55  
56  
57  
58  
59  
60



- 1  
2  
3 76. Khalatbari-Soltani S, Cumming RG, Delpierre C, Kelly-Irving M. Importance of collecting  
4 data on socioeconomic determinants from the early stage of the COVID-19 outbreak onwards.  
5 *Journal of epidemiology and community health*. 2020.  
6
- 7 77. Khan S, Jun L, Nawsherwan N, Siddique R, Li Y, Han G, et al. Association of COVID-19  
8 infection with pregnancy outcomes in healthcare workers and general women. *Clinical*  
9 *microbiology and infection : the official publication of the European Society of Clinical*  
10 *Microbiology and Infectious Diseases*. 2020;26(6):788-90.  
11
- 12 78. Khan S, Peng L, Siddique R, Nabi G, Nawsherwan N, Xue M, et al. Impact of COVID-19  
13 infection on pregnancy outcomes and the risk of maternal-to-neonatal intrapartum transmission  
14 of COVID-19 during natural birth. *Infection control and hospital epidemiology*. 2020;41(6):1-3.  
15
- 16 79. Khot WY, Nadkar MY. The 2019 Novel Coronavirus Outbreak - A Global Threat. *The*  
17 *Journal of the Association of Physicians of India*. 2020;68(3):67-71.  
18
- 19 80. Kim DH, Choe YJ, Jeong JY. Understanding and Interpretation of Case Fatality Rate of  
20 Coronavirus Disease 2019. *Journal of Korean medical science*. 2020;35(12):e137.  
21
- 22 81. Kirby T. Efforts escalate to protect homeless people from COVID-19 in UK. *The Lancet*  
23 *Respiratory medicine*. 2020;8(5):447-9.  
24
- 25 82. Klonoff DC, Umpierrez GE. Letter to the Editor: COVID-19 in patients with diabetes: Risk  
26 factors that increase morbidity. *Metabolism: clinical and experimental*. 2020;108:154224.  
27
- 28 83. Knight A. Letter to the Editor about the Article "Excess Mortality Estimation During the  
29 COVID-19 Pandemic: Preliminary Data from Portugal <https://doi.org/10.20344/amp.13928>". *Acta*  
30 *medica portuguesa*. 2020;33(6):446-7.  
31
- 32 84. Kollias A, Kyriakoulis KG, Dimakakos E, Poulakou G, Stergiou GS, Syrigos K.  
33 Thromboembolic risk and anticoagulant therapy in COVID-19 patients: emerging evidence and  
34 call for action. *British journal of haematology*. 2020;189(5):846-7.  
35
- 36 85. Konig MF, Gianfrancesco M, Yazdany J, Robinson PC. Patients with systemic lupus  
37 erythematosus using hydroxychloroquine or chloroquine develop severe COVID-19 at similar  
38 frequency as patients not on antimalarials: need to explore antithrombotic benefits for COVID-  
39 19 coagulopathy. Response to: 'Clinical course of COVID-19 in patients with systemic lupus  
40 erythematosus under long-term treatment with hydroxychloroquine' by Carbillon et al. *Annals of*  
41 *the rheumatic diseases*. 2020.  
42
- 43 86. Kosinski C, Zanchi A, Wojtuszczyz A. [Diabetes and COVID-19 infection]. *Diabete et*  
44 *infection a COVID-19*. 2020;16(692):939-43.  
45
- 46 87. Kreutz R, Algharably EAE-H, Azizi M, Dobrowolski P, Guzik T, Januszewicz A, et al.  
47 Hypertension, the renin-angiotensin system, and the risk of lower respiratory tract infections and  
48 lung injury: implications for COVID-19. *Cardiovascular research*. 2020.  
49
- 50 88. Kulkarni RK, Kinikar AA, Chandanwale A. Impact of COVID-19 on Children and  
51 Pediatricians. *Indian pediatrics*. 2020;57(5):480-1.  
52
- 53 89. Kulkarni S, Jenner BL, Wilkinson I. COVID-19 and hypertension. *Journal of the renin-*  
54 *angiotensin-aldosterone system : JRAAS*. 2020;21(2):1470320320927851.  
55  
56  
57

- 1  
2  
3 90. Lapolla P, Mingoli A, Lee R. Deaths from COVID-19 in healthcare workers in Italy-What  
4 can we learn? *Infection control and hospital epidemiology*. 2020:1-2.  
5
- 6 91. Laster Pirtle WN. Racial Capitalism: A Fundamental Cause of Novel Coronavirus  
7 (COVID-19) Pandemic Inequities in the United States. *Health education & behavior* : the official  
8 publication of the Society for Public Health Education. 2020:1090198120922942.  
9
- 10 92. Lee H, Miller VJ. The Disproportionate Impact of COVID-19 on Minority Groups: A Social  
11 Justice Concern. *Journal of gerontological social work*. 2020:1-5.  
12
- 13 93. Lee PI, Hu YL, Chen PY, Huang YC, Hsueh PR. Are children less susceptible to COVID-  
14 19? *Journal of microbiology, immunology, and infection = Wei mian yu gan ran za zhi*. 2020.  
15
- 16 94. Lee YJ. The Impact of the COVID-19 Pandemic on Vulnerable Older Adults in the United  
17 States. *Journal of gerontological social work*. 2020:1-6.  
18
- 19 95. Leung JM, Yang CX, Sin DD. Reply to: "Current smoking is not associated with COVID-  
20 19". *The European respiratory journal*. 2020;55(6).  
21
- 22 96. Liguoro I, Pilotto C, Bonanni M, Ferrari ME, Pusiolo A, Nocerino A, et al. SARS-COV-2  
23 infection in children and newborns: a systematic review. *European journal of pediatrics*. 2020.  
24
- 25 97. Lillicrap D. Disseminated intravascular coagulation in patients with 2019-nCoV  
26 pneumonia. *Journal of thrombosis and haemostasis* : JTH. 2020;18(4):786-7.  
27
- 28 98. Lippi G, Favaloro EJ. D-dimer is Associated with Severity of Coronavirus Disease 2019:  
29 A Pooled Analysis. *Thrombosis and haemostasis*. 2020;120(5):876-8.  
30
- 31 99. Lippi G, Mattiuzzi C. Hemoglobin value may be decreased in patients with severe  
32 coronavirus disease 2019. *Hematology, transfusion and cell therapy*. 2020;42(2):116-7.  
33
- 34 100. Lippi G, Wong J, Henry BM. Myalgia may not be associated with severity of coronavirus  
35 disease 2019 (COVID-19). *World journal of emergency medicine*. 2020;11(3):193-4.  
36
- 37 101. Liu Y, Chen H, Tang K, Guo Y. Clinical manifestations and outcome of SARS-CoV-2  
38 infection during pregnancy. *The Journal of infection*. 2020.  
39
- 40 102. Liu Z, Long W, Tu M, Chen S, Huang Y, Wang S, et al. Lymphocyte subset (CD4+,  
41 CD8+) counts reflect the severity of infection and predict the clinical outcomes in patients with  
42 COVID-19. *The Journal of infection*. 2020.  
43
- 44 103. Lu X, Zhang L, Du H, Zhang J, Li YY, Qu J, et al. SARS-CoV-2 Infection in Children. *The*  
45 *New England journal of medicine*. 2020;382(17):1663-5.  
46
- 47 104. Madjid M, Safavi-Naeini P, Solomon SD, Vardeny O. Potential Effects of Coronaviruses  
48 on the Cardiovascular System: A Review. *JAMA cardiology*. 2020.  
49
- 50 105. Magrone T, Magrone M, Jirillo E. Focus on Receptors for Coronaviruses with Special  
51 Reference to Angiotensin-converting Enzyme 2 as a Potential Drug Target - A Perspective.  
52 *Endocrine, metabolic & immune disorders drug targets*. 2020.  
53
- 54 106. Mahase E. Covid-19: death rate is 0.66% and increases with age, study estimates. *BMJ*  
55 (Clinical research ed). 2020;369:m1327.  
56  
57  
58  
59  
60

- 1  
2  
3 107. Malard F, Mohty M. Management of patients with multiple myeloma during the COVID-  
4 19 pandemic. *The Lancet Haematology*. 2020;7(6):e435-e7.  
5  
6 108. Mansur JL. Letter: low population mortality from COVID-19 in countries south of latitude  
7 35 degrees North supports vitamin D as a factor determining severity. *Alimentary pharmacology*  
8 & therapeutics. 2020.  
9  
10 109. Marongiu F, Grandone E, Barcellona D. Pulmonary thrombosis in 2019-nCoV  
11 pneumonia? *Journal of thrombosis and haemostasis : JTH*. 2020;18(6):1511-3.  
12  
13 110. McGonagle D, Plein S, O'Donnell JS, Sharif K, Bridgewood C. Increased cardiovascular  
14 mortality in African Americans with COVID-19. *The Lancet Respiratory medicine*. 2020.  
15  
16 111. McSharry D, Malhotra A. Potential influences of obstructive sleep apnea and obesity on  
17 COVID-19 severity. *Journal of clinical sleep medicine : JCSM : official publication of the*  
18 *American Academy of Sleep Medicine*. 2020.  
19  
20 112. Memtsoudis SG, Ivascu NS, Pryor KO, Goldstein PA. Obesity as a risk factor for poor  
21 outcome in COVID-19-induced lung injury: the potential role of undiagnosed obstructive sleep  
22 apnoea. *British journal of anaesthesia*. 2020.  
23  
24 113. Meo SA, Alhowikan AM, Al-Khlaiwi T, Meo IM, Halepoto DM, Iqbal M, et al. Novel  
25 coronavirus 2019-nCoV: prevalence, biological and clinical characteristics comparison with  
26 SARS-CoV and MERS-CoV. *European review for medical and pharmacological sciences*.  
27 2020;24(4):2012-9.  
28  
29 114. Miller R, Englund K. Transmission and risk factors of OF COVID-19. *Cleveland Clinic*  
30 *journal of medicine*. 2020.  
31  
32 115. Mills JP, Kaye KS, Mody L. COVID-19 in older adults: clinical, psychosocial, and public  
33 health considerations. *JCI insight*. 2020;5(10).  
34  
35 116. Mueller AL, McNamara MS, Sinclair DA. Why does COVID-19 disproportionately affect  
36 older people? *Aging*. 2020;12(10):9959-81.  
37  
38 117. Muhidin S, Behboodi Moghadam Z, Vizheh M. Analysis of Maternal Coronavirus  
39 Infections and Neonates Born to Mothers with 2019-nCoV; a Systematic Review. *Archives of*  
40 *academic emergency medicine*. 2020;8(1):e49.  
41  
42 118. Muurlink OT, Taylor-Robinson AW. COVID-19: Cultural Predictors of Gender Differences  
43 in Global Prevalence Patterns. *Frontiers in public health*. 2020;8:174.  
44  
45 119. Nguyen A, David JK, Maden SK, Wood MA, Weeder BR, Nellore A, et al. Human  
46 leukocyte antigen susceptibility map for SARS-CoV-2. *Journal of virology*. 2020.  
47  
48 120. Nikpour M, Teh B, Wicks IP, Pellegrini M. Correspondence regarding research letter to  
49 the editor by Mathian et al, 'Clinical course of coronavirus disease 2019 (COVID-19) in a series  
50 of 17 patients with systemic lupus under long-term treatment with hydroxychloroquine'. *Annals*  
51 *of the rheumatic diseases*. 2020.  
52  
53 121. Osman MS, van Eeden C, Cohen Tervaert JW. Fatal COVID-19 infections: Is NK cell  
54 dysfunction a link with autoimmune HLH? *Autoimmunity reviews*. 2020;19(7):102561.  
55  
56  
57  
58  
59

- 1  
2  
3 122. Pal R. COVID-19, hypothalamo-pituitary-adrenal axis and clinical implications. *Endocrine*. 2020;68(2):251-2.  
4  
5  
6 123. Palmieri C, Palmer D, Openshaw PJ, Baille JK, Semple MG, Turtle L. Cancer datasets  
7 and the SARS-CoV-2 pandemic: establishing principles for collaboration. *ESMO open*.  
8 2020;5(3).  
9  
10 124. Pantos C, Tseti I, Mourouzis I. Use of triiodothyronine to treat critically ill COVID-19  
11 patients: a new clinical trial. *Critical care (London, England)*. 2020;24(1):209.  
12  
13 125. Papa SM, Brundin P, Fung VSC, Kang UJ, Burn DJ, Colosimo C, et al. Impact of the  
14 COVID-19 Pandemic on Parkinson's Disease and Movement Disorders. *Movement disorders*  
15 *clinical practice*. 2020;7(4):357-60.  
16  
17 126. Patanavanich R, Glantz SA. Smoking is Associated with COVID-19 Progression: A  
18 Meta-Analysis. *medRxiv : the preprint server for health sciences*. 2020.  
19  
20 127. Pawlotsky J-M. COVID-19 and the liver-related deaths to come. *Nature reviews*  
21 *Gastroenterology & hepatology*. 2020.  
22  
23 128. Pitocco D, Tartaglione L, Viti L, Di Leo M, Pontecorvi A, Caputo S. SARS-CoV-2 and  
24 DPP4 inhibition: Is it time to pray for Janus Bifrons? *Diabetes research and clinical practice*.  
25 2020;163:108162.  
26  
27 129. Porcheddu R, Serra C, Kelvin D, Kelvin N, Rubino S. Similarity in Case Fatality Rates  
28 (CFR) of COVID-19/SARS-COV-2 in Italy and China. *Journal of infection in developing*  
29 *countries*. 2020;14(2):125-8.  
30  
31 130. Post A, Dullaart RPF, Bakker SJL. Is low sodium intake a risk factor for severe and fatal  
32 COVID-19 infection? *European journal of internal medicine*. 2020;75:109.  
33  
34 131. Poston JT, Patel BK, Davis AM. Management of Critically Ill Adults With COVID-19.  
35 *JAMA*. 2020.  
36  
37 132. Preskorn SH. The 5% of the Population at High Risk for Severe COVID-19 Infection Is  
38 Identifiable and Needs to Be Taken Into Account When Reopening the Economy. *Journal of*  
39 *psychiatric practice*. 2020;26(3):219-27.  
40  
41 133. Printza A, Constantinidis J. The role of self-reported smell and taste disorders in  
42 suspected COVID-19. *Eur Arch Otorhinolaryngol*. 2020:1-6.  
43  
44 134. Ramasamy R, Milne K, Bell D, Stoneham S, Chevassut T. Molecular mechanisms for  
45 thrombosis risk in Black people: a role in excess mortality from COVID-19. *British journal of*  
46 *haematology*. 2020.  
47  
48 135. Raymond E, Thieblemont C, Alran S, Faivre S. Impact of the COVID-19 Outbreak on the  
49 Management of Patients with Cancer. *Targeted oncology*. 2020;15(3):249-59.  
50  
51 136. Rhodes JM, Subramanian S, Laird E, Kenny RA. Letter: low population mortality from  
52 COVID-19 in countries south of latitude 35degree North supports vitamin D as a factor  
53 determining severity-authors' reply. *Alimentary pharmacology & therapeutics*. 2020.  
54  
55  
56  
57  
58  
59  
60

- 1  
2  
3 137. Rocha JC, Calhau C, MacDonald A. Reply to Jakovac; Severity of COVID-19 infection in  
4 patients with phenylketonuria: is vitamin D status protective? *American journal of physiology*  
5 *Endocrinology and metabolism*. 2020;318(6):E890-E1.  
6  
7 138. Roncon L, Zuin M, Zonzin P. Age-adjusted D-dimer cut-off levels to rule out venous  
8 thromboembolism in COVID-19 patients. *Thrombosis research*. 2020;190:102.  
9  
10 139. Roncon L, Zuin M, Zuliani G, Rigatelli G. Patients with arterial hypertension and COVID-  
11 19 are at higher risk of ICU admission. *British journal of anaesthesia*. 2020.  
12  
13 140. Rosen RJ. Thrombotic complications in critically ill patients with COVID 19. *Thrombosis*  
14 *research*. 2020;191:56.  
15  
16 141. Rossato M, Russo L, Mazzocut S, Di Vincenzo A, Fioretto P, Vettor R. Current smoking  
17 is not associated with COVID-19. *The European respiratory journal*. 2020;55(6).  
18  
19 142. Salemi JL, Menard J, Pathak EB. Estimating severe and critical illness in children with  
20 COVID-19. *Early human development*. 2020;144:105052.  
21  
22 143. Sattar N, McInnes IB, McMurray JJV. Obesity a Risk Factor for Severe COVID-19  
23 Infection: Multiple Potential Mechanisms. *Circulation*. 2020.  
24  
25 144. Schwartz DA. The Effects of Pregnancy on Women with COVID-19: Maternal and Infant  
26 Outcomes. *Clinical infectious diseases : an official publication of the Infectious Diseases Society*  
27 *of America*. 2020.  
28  
29 145. Selvan ME. Risk factors for death from COVID-19. *Nature reviews Immunology*. 2020.  
30  
31 146. Senni M. COVID-19 experience in Bergamo, Italy. *European heart journal*.  
32 2020;41(19):1783-4.  
33  
34 147. Shah GH, Shankar P, Schwind JS, Sittaramane V. The Detrimental Impact of the  
35 COVID-19 Crisis on Health Equity and Social Determinants of Health. *Journal of public health*  
36 *management and practice : JPHMP*. 2020;26(4):317-9.  
37  
38 148. Shah M, Sachdeva M, Dodiuk-Gad RP. The impact of hydroxychloroquine shortages on  
39 patients with dermatological conditions during COVID-19 pandemic. *Dermatologic therapy*.  
40 2020:e13524.  
41  
42 149. Sharma G, Volgman AS, Michos ED. Sex Differences in Mortality from COVID-19  
43 Pandemic: Are Men Vulnerable and Women Protected? *JACC Case reports*. 2020.  
44  
45 150. Sinha IP, Harwood R, Semple MG, Hawcutt DB, Thursfield R, Narayan O, et al. COVID-  
46 19 infection in children. *The Lancet Respiratory medicine*. 2020;8(5):446-7.  
47  
48 151. Skarstein Kolberg E. ACE2, COVID19 and serum ACE as a possible biomarker to  
49 predict severity of disease. *Journal of clinical virology : the official publication of the Pan*  
50 *American Society for Clinical Virology*. 2020;126:104350.  
51  
52 152. Sommerstein R, Kochen MM, Messerli FH, Grani C. Coronavirus Disease 2019 (COVID-  
53 19): Do Angiotensin-Converting Enzyme Inhibitors/Angiotensin Receptor Blockers Have a  
54 Biphasic Effect? *Journal of the American Heart Association*. 2020;9(7):e016509.  
55  
56  
57  
58  
59  
60

- 1  
2  
3 153. Soraya GV, Ulhaq ZS. Interleukin-6 levels in children developing SARS-CoV-2 infection. *Pediatrics and neonatology*. 2020;61(3):253-4.  
4  
5  
6 154. Souch JM, Cossman JS. A Commentary on Rural-Urban Disparities in COVID-19  
7 Testing Rates per 100,000 and Risk Factors. *The Journal of rural health : official journal of the*  
8 *American Rural Health Association and the National Rural Health Care Association*. 2020.  
9  
10 155. Stafford N. Covid-19: Why Germany's case fatality rate seems so low. *BMJ (Clinical*  
11 *research ed)*. 2020;369:m1395.  
12  
13 156. Sundaram M, Ravikumar N, Bansal A, Nallasamy K, Basavaraja GV, Lodha R, et al.  
14 Novel Coronavirus 2019 (2019-nCoV) Infection: Part II - Respiratory Support in the Pediatric  
15 Intensive Care Unit in Resource-limited Settings. *Indian pediatrics*. 2020;57(4):335-42.  
16  
17 157. Tan L, Wang Q, Zhang D, Ding J, Huang Q, Tang Y-Q, et al. Correction: Lymphopenia  
18 predicts disease severity of COVID-19: a descriptive and predictive study. *Signal transduction*  
19 *and targeted therapy*. 2020;5:61.  
20  
21 158. Tan L, Wang Q, Zhang D, Ding J, Huang Q, Tang YQ, et al. Lymphopenia predicts  
22 disease severity of COVID-19: a descriptive and predictive study. *Signal transduction and*  
23 *targeted therapy*. 2020;5(1):33.  
24  
25 159. Tapia-Orihuela RKA. Hypertension and coronavirus disease 2019 mortality. *Journal of*  
26 *hypertension*. 2020;38(6):1197-8.  
27  
28 160. Taub JW, Ge Y, Xavier AC. COVID-19 and childhood acute lymphoblastic leukemia.  
29 *Pediatric blood & cancer*. 2020;67(7):e28400.  
30  
31 161. Temgoua MN, Kuate LM, Ngatchou W, Sibetcheu A, Toupendi ZN, Belobo G, et al.  
32 COVID-19 pandemic: do we need systematic screening of patients with cardiovascular risk  
33 factors in Low and Middle-Income Countries (LMICs) for preventing death? *The Pan African*  
34 *medical journal*. 2020;35(Suppl 2):11.  
35  
36 162. Tolksdorf K, Buda S, Schuler E, Wieler LH, Haas W. Influenza-associated pneumonia as  
37 reference to assess seriousness of coronavirus disease (COVID-19). *Euro surveillance : bulletin*  
38 *Europeen sur les maladies transmissibles = European communicable disease bulletin*.  
39 2020;25(11).  
40  
41 163. University Hospital BS. Amotosalen-Ultraviolet A Pathogen-Inactivated Convalescent  
42 Plasma in Addition to Best Supportive Care and Antiviral Therapy on Clinical Deterioration in  
43 Adults Presenting With Moderate to Severe COVID-19. *clinicaltrials.gov*. 2020.  
44  
45 164. van Nieuwkoop C. COVID-19 associated pulmonary thrombosis. *Thrombosis research*.  
46 2020;191:151.  
47  
48 165. Vankadari N, Wilce JA. Emerging WuHan (COVID-19) coronavirus: glycan shield and  
49 structure prediction of spike glycoprotein and its interaction with human CD26. *Emerging*  
50 *microbes & infections*. 2020;9(1):601-4.  
51  
52 166. Vazquez JC, Redolar-Ripoll D. COVID-19 outbreak impact in Spain: A role for tobacco  
53 smoking? *Tobacco induced diseases*. 2020;18:30.  
54  
55  
56  
57  
58  
59  
60

- 1  
2  
3 167. Venkatesulu BP, Chandrasekar VT, Girdhar P, Advani P, Sharma A, Elumalai T, et al. A  
4 systematic review and meta-analysis of cancer patients affected by a novel coronavirus.  
5 medRxiv : the preprint server for health sciences. 2020.  
6
- 7 168. Wise J. Covid-19: Known risk factors fail to explain the increased risk of death among  
8 people from ethnic minorities. *BMJ (Clinical research ed)*. 2020;369:m1873.  
9
- 10 169. Xu G, Yang Y, Du Y, Peng F, Hu P, Wang R, et al. Clinical Pathway for Early Diagnosis  
11 of COVID-19: Updates from Experience to Evidence-Based Practice. *Clinical reviews in allergy  
12 & immunology*. 2020.  
13
- 14 170. Yagnik PJ, Umscheid J, Khan AW, Ali M, Bhatt P, Desai PH. Pediatric Characteristics of  
15 2019 Novel Coronavirus: Review of Available Published Literature. *Clinical pediatrics*.  
16 2020:9922820920017.  
17
- 18 171. Yahya AS, Khawaja S, Chukwuma J. Association of COVID-19 With Intimate Partner  
19 Violence. *The primary care companion for CNS disorders*. 2020;22(3).  
20
- 21 172. Yan F, Nguyen SA. Head and neck cancer: high-risk population for COVID-19. *Head &  
22 neck*. 2020;42(6):1150-2.  
23
- 24 173. Yaya S, Yeboah H, Charles CH, Otu A, Labonte R. Ethnic and racial disparities in  
25 COVID-19-related deaths: counting the trees, hiding the forest. *BMJ global health*. 2020;5(6).  
26
- 27 174. Zambrano LI, Fuentes-Barahona IC, Bejarano-Torres DA, Bustillo C, Gonzales G,  
28 Vallecillo-Chinchilla G, et al. A pregnant woman with COVID-19 in Central America. *Travel  
29 medicine and infectious disease*. 2020:101639.  
30
- 31 175. Zumla A, Hui DS, Azhar EI, Memish ZA, Maeurer M. Reducing mortality from 2019-  
32 nCoV: host-directed therapies should be an option. *Lancet (London, England)*.  
33 2020;395(10224):e35-e6.  
34

#### 35 **Excluded – sample size <10 (n=62)**

- 36
- 37 1. Arpali E, Akyollu B, Yelken B, Tekin S, Turkmen A, Kocak B. Case report: A kidney  
38 transplant patient with mild COVID-19. *Transplant infectious disease : an official journal of the  
39 Transplantation Society*. 2020:e13296.  
40
- 41 2. Banerjee D, Popoola J, Shah S, Ster IC, Quan V, Phanish M. COVID-19 infection in  
42 kidney transplant recipients. *Kidney international*. 2020;97(6):1076-82.  
43
- 44 3. Benger M, Williams O, Siddiqui J, Sztriha L. Intracerebral haemorrhage (ICH) and  
45 COVID-19: Clinical characteristics from a case series. *Brain, behavior, and immunity*. 2020.  
46
- 47 4. Beyrouti R, Adams ME, Benjamin L, Cohen H, Farmer SF, Goh YY, et al. Characteristics  
48 of ischaemic stroke associated with COVID-19. *Journal of neurology, neurosurgery, and  
49 psychiatry*. 2020.  
50
- 51 5. Bhoori S, Rossi RE, Citterio D, Mazzaferro V. COVID-19 in long-term liver transplant  
52 patients: preliminary experience from an Italian transplant centre in Lombardy. *The lancet  
53 Gastroenterology & hepatology*. 2020;5(6):532-3.  
54  
55  
56  
57  
58  
59  
60

- 1  
2  
3 6. Blanco JL, Ambrosioni J, Garcia F, Martinez E, Soriano A, Mallolas J, et al. COVID-19 in  
4 patients with HIV: clinical case series. *The lancet HIV*. 2020;7(5):e314-e6.
- 5  
6 7. Blondiaux E, Parisot P, Redheuil A, Tzaroukian L, Levy Y, Sileo C, et al. Cardiac MRI of  
7 Children with Multisystem Inflammatory Syndrome (MIS-C) Associated with COVID-19: Case  
8 Series. *Radiology*. 2020:202288.
- 9  
10 8. Bossoni S, Chiesa L, Giustina A. Severe hypocalcemia in a thyroidectomized woman  
11 with Covid-19 infection. *Endocrine*. 2020;68(2):253-4.
- 12  
13 9. Bowen JD, Brink J, Brown TR, Lucassen EB, Smoot K, Wundes A, et al. COVID-19 in  
14 MS: Initial observations from the Pacific Northwest. *Neurology(R) neuroimmunology &*  
15 *neuroinflammation*. 2020;7(5).
- 16  
17 10. Chiarini M, Paghera S, Moratto D, Rossi ND, Giacomelli M, Badolato R, et al.  
18 Immunologic characterization of a immunosuppressed multiple sclerosis patient that recovered  
19 from SARS-CoV-2 infection. *Journal of neuroimmunology*. 2020;345:577282.
- 20  
21 11. Climent FJ, Calvo C, Garcia-Guereta L, Rodriguez-Alvarez D, Buitrago NM, Perez-  
22 Martinez A. Fatal outcome of COVID-19 disease in a 5-month infant with comorbidities. *Revista*  
23 *espanola de cardiologia (English ed)*. 2020.
- 24  
25 12. Codispoti CD, Bandi S, Patel P, Mahdavinia M. Clinical course of asthma in 4 cases of  
26 coronavirus disease 2019 infection. *Annals of allergy, asthma & immunology : official publication*  
27 *of the American College of Allergy, Asthma, & Immunology*. 2020.
- 28  
29 13. Cozzi E, Faccioli E, Marinello S, Loy M, Congedi S, Calabrese F, et al. COVID-19  
30 pneumonia in lung transplant recipients: report of two cases. *American journal of transplantation*  
31 *: official journal of the American Society of Transplantation and the American Society of*  
32 *Transplant Surgeons*. 2020.
- 33  
34 14. Creel-Bulos C, Hockstein M, Amin N, Melhem S, Truong A, Sharifpour M. Acute Cor  
35 Pulmonale in Critically Ill Patients with Covid-19. *The New England journal of medicine*.  
36 2020;382(21):e70.
- 37  
38 15. Cui Y, Tian M, Huang D, Wang X, Huang Y, Fan L, et al. A 55-Day-Old Female Infant  
39 infected with COVID 19: presenting with pneumonia, liver injury, and heart damage. *The Journal*  
40 *of infectious diseases*. 2020;221(11):1775-81.
- 41  
42 16. Dabbagh MF, Aurora L, D'Souza P, Weinmann AJ, Bhargava P, Basir MB. Cardiac  
43 Tamponade Secondary to COVID-19. *JACC Case reports*. 2020.
- 44  
45 17. Danzi GB, Loffi M, Galeazzi G, Gherbesi E. Acute pulmonary embolism and COVID-19  
46 pneumonia: a random association? *European heart journal*. 2020;41(19):1858.
- 47  
48 18. Dong L, Tian J, He S, Zhu C, Wang J, Liu C, et al. Possible Vertical Transmission of  
49 SARS-CoV-2 From an Infected Mother to Her Newborn. *JAMA*. 2020:E1-E3.
- 50  
51 19. Escher R, Breakey N, Lammle B. Severe COVID-19 infection associated with endothelial  
52 activation. *Thrombosis research*. 2020;190:62.
- 53  
54 20. Fontana F, Alfano G, Mori G, Amurri A, Tei L, Ballestri M, et al. COVID-19 pneumonia in  
55 a kidney transplant recipient successfully treated with tocilizumab and hydroxychloroquine.
- 56  
57  
58  
59  
60



American journal of transplantation : official journal of the American Society of Transplantation and the American Society of Transplant Surgeons. 2020.

21. Garcia-Salido A, Leoz-Gordillo I, Martinez de Azagra-Garde A, Nieto-Moro M, Iglesias-Bouzas MI, Garcia-Teresa MA, et al. Children in Critical Care Due to Severe Acute Respiratory Syndrome Coronavirus 2 Infection: Experience in a Spanish Hospital. *Pediatric critical care medicine : a journal of the Society of Critical Care Medicine and the World Federation of Pediatric Intensive and Critical Care Societies*. 2020.

22. Gautier-Vargas G, Baldacini C, Benotmane I, Keller N, Perrin P, Moulin B, et al. Rapid resolution of cytokine release syndrome and favorable clinical course of severe COVID-19 in a kidney transplant recipient treated with tocilizumab. *Kidney international*. 2020.

23. Gayam V, Konala VM, Naramala S, Garlapati PR, Merghani MA, Regmi N, et al. Presenting characteristics, comorbidities, and outcomes of patients coinfectd with COVID-19 and *Mycoplasma pneumoniae* in the USA. *Journal of medical virology*. 2020.

24. Govind A, Essien S, Karthikeyan A, Fakokunde A, Janga D, Yoong W, et al. Re: Novel Coronavirus COVID-19 in late pregnancy: Outcomes of first nine cases in an inner city London hospital. *European journal of obstetrics, gynecology, and reproductive biology*. 2020.

25. Hadi A, Werge M, Kristiansen KT, Pedersen UG, Karstensen JG, Novovic S, et al. Coronavirus Disease-19 (COVID-19) associated with severe acute pancreatitis: Case report on three family members. *Pancreatology : official journal of the International Association of Pancreatology (IAP)* [et al]. 2020;20(4):665-7.

26. Hammami MB, Garibaldi B, Shah P, Liu G, Jain T, Chen P-H, et al. Clinical course of COVID-19 in a liver transplant recipient on hemodialysis and response to tocilizumab therapy: A case report. *American journal of transplantation : official journal of the American Society of Transplantation and the American Society of Transplant Surgeons*. 2020.

27. He G, Wu J, Shi J, Dai J, Gamber M, Jiang X, et al. COVID-19 in Tuberculosis patients: a report of three cases. *Journal of medical virology*. 2020.

28. Hong L, Smith N, Keerthy M, Lee-Griffith M, Garcia R, Shaman M, et al. Severe COVID-19 infection in pregnancy requiring intubation without preterm delivery: A case report. *Case reports in women's health*. 2020;27:e00217.

29. Hsu JJ, Gaynor P, Kamath M, Fan A, Al-Saffar F, Cruz D, et al. COVID-19 in a High-Risk Dual Heart and Kidney Transplant Recipient. *American journal of transplantation : official journal of the American Society of Transplantation and the American Society of Transplant Surgeons*. 2020.

30. Inciardi RM, Lupi L, Zaccone G, Italia L, Raffo M, Tomasoni D, et al. Cardiac Involvement in a Patient With Coronavirus Disease 2019 (COVID-19). *JAMA cardiology*. 2020.

31. Jasinowodolinski D, Filisbino MM, Baldi BG. COVID-19 pneumonia: a risk factor for pulmonary thromboembolism? *Jornal brasileiro de pneumologia : publicacao oficial da Sociedade Brasileira de Pneumologia e Tisiologia*. 2020;46(4):e20200168.

- 1  
2  
3 32. Juusela A, Nazir M, Gimovsky M. Two cases of coronavirus 2019-related  
4 cardiomyopathy in pregnancy. *American journal of obstetrics & gynecology* MFM.  
5 2020;2(2):100113.  
6
- 7 33. Karami P, Naghavi M, Feyzi A, Aghamohammadi M, Novin MS, Mobaien A, et al.  
8 Mortality of a pregnant patient diagnosed with COVID-19: A case report with clinical,  
9 radiological, and histopathological findings. *Travel medicine and infectious disease*.  
10 2020:101665.  
11
- 12 34. Kim Y, Kwon O, Paek JH, Park WY, Jin K, Hyun M, et al. Two distinct cases with  
13 COVID-19 in kidney transplant recipients. *American journal of transplantation : official journal of*  
14 *the American Society of Transplantation and the American Society of Transplant Surgeons*.  
15 2020.  
16
- 17 35. Kirienko M, Padovano B, Serafini G, Marchiano A, Gronchi A, Seregini E, et al. CT,  
18 [18F]FDG-PET/CT and clinical findings before and during early Covid-19 onset in a patient  
19 affected by vascular tumour. *European journal of nuclear medicine and molecular imaging*.  
20 2020;47(7):1769-70.  
21
- 22 36. Konopka KE, Wilson A, Myers JL. Postmortem Lung Findings in an Asthmatic Patient  
23 With Coronavirus Disease 2019. *Chest*. 2020.  
24
- 25 37. Mariano RZ, Ramos MdC, Reis F. COVID-19 and pulmonary embolism: Do not forget  
26 the association! *Revista da Sociedade Brasileira de Medicina Tropical*. 2020;53:e20200234.  
27
- 28 38. Mehta H, Ivanovic S, Cronin A, VanBrunt L, Mistry N, Miller R, et al. Novel coronavirus-  
29 related acute respiratory distress syndrome in a patient with twin pregnancy: A case report.  
30 *Case reports in women's health*. 2020:e00220.  
31
- 32 39. Merli M, Perricone G, Lauterio A, Prosperi M, Travi G, Roselli E, et al. Reply to  
33 "Coronaviruses and immunosuppressed patients. The facts during the third epidemic". *Liver*  
34 *transplantation : official publication of the American Association for the Study of Liver Diseases*  
35 *and the International Liver Transplantation Society*. 2020.  
36
- 37 40. Modi AR, Koval CE, Taege AJ, Modaresi Esfeh J, Eghtesad B, Menon KVN, et al.  
38 Coronavirus Disease 2019 in an Orthotopic Liver Transplant Recipient Living with Human  
39 Immunodeficiency Virus. *Transplant infectious disease : an official journal of the Transplantation*  
40 *Society*. 2020:e13351.  
41
- 42 41. Monti S, Balduzzi S, Delvino P, Bellis E, Quadrelli VS, Montecucco C. Clinical course of  
43 COVID-19 in a series of patients with chronic arthritis treated with immunosuppressive targeted  
44 therapies. *Annals of the rheumatic diseases*. 2020;79(5):667-8.  
45
- 46 42. Morlacchi LC, Rossetti V, Gigli L, Amati F, Rosso L, Aliberti S, et al. COVID-19 In Lung  
47 Transplant Recipients: A Case Series From Milan, Italy. *Transplant infectious disease : an*  
48 *official journal of the Transplantation Society*. 2020:e13356.  
49
- 50 43. Ning L, Liu L, Li W, Liu H, Wang J, Yao Z, et al. Novel Coronavirus (SARS-CoV-2)  
51 Infection in A Renal Transplant Recipient: Case Report. *American journal of transplantation :*  
52 *official journal of the American Society of Transplantation and the American Society of*  
53 *Transplant Surgeons*. 2020.  
54  
55  
56  
57  
58  
59  
60

- 1  
2  
3 44. Parasole R, Stellato P, Conter V, De Matteo A, D'Amato L, Colombini A, et al. Collateral  
4 effects of COVID-19 pandemic in pediatric hematooncology: Fatalities caused by diagnostic  
5 delay. *Pediatric blood & cancer*. 2020:e28482.  
6
- 7 45. Park JY, Han MS, Park KU, Kim JY, Choi EH. First Pediatric Case of Coronavirus  
8 Disease 2019 in Korea. *Journal of Korean medical science*. 2020;35(11):e124.  
9
- 10 46. Quintavalle G, Coppola A, Ruggieri A, Franca Rivolta G, Fronti E, Giangregorio F, et al.  
11 Severe bleeding in a patient with Factor XIII deficiency and COVID-19. *Haemophilia : the official  
12 journal of the World Federation of Hemophilia*. 2020.  
13
- 14 47. Rodriguez-Cola M, Jimenez-Velasco I, Gutierrez-Henares F, Lopez-Dolado E,  
15 Gambarrutta-Malfatti C, Vargas-Baquero E, et al. Clinical features of coronavirus disease 2019  
16 (COVID-19) in a cohort of patients with disability due to spinal cord injury. *Spinal cord series  
17 and cases*. 2020;6(1):39.  
18
- 19 48. Sereno M, Gutierrez-Gutierrez G, Sandoval C, Falagan S, Jimenez-Gordo AM, Merino  
20 M, et al. A favorable outcome of pneumonia COVID 19 in an advanced lung cancer patient with  
21 severe neutropenia: Is immunosuppression a risk factor for SARS-COV2 infection? *Lung cancer  
22 (Amsterdam, Netherlands)*. 2020;145:213-5.  
23
- 24 49. Sharmeen S, Elghawy A, Zarlusht F, Yao QP. COVID-19 in rheumatic disease patients  
25 on immunosuppressive agents. *Seminars in arthritis and rheumatism*. 2020;50(4):680-6.  
26
- 27 50. Silverstein WK, Stroud L, Cleghorn GE, Leis JA. First imported case of 2019 novel  
28 coronavirus in Canada, presenting as mild pneumonia. *Lancet (London, England)*.  
29 2020;395(10225):734.  
30
- 31 51. Solis E, Hameed A, Brown K, Pleass H, Johnston E. Delayed emergency surgical  
32 presentation: impact of corona virus disease (COVID-19) on non-COVID patients. *ANZ journal  
33 of surgery*. 2020.  
34
- 35 52. Stoleriu MG, Gerckens M, Hetrodt J, Heis-Neumann M, Koch I, Stacher-Priehse E, et al.  
36 Clinical course of three postoperative symptomatic Covid-19 cases in patients after lung  
37 lobectomy. *The Annals of thoracic surgery*. 2020.  
38
- 39 53. Suess C, Hausmann R. Gross and histopathological pulmonary findings in a COVID-19  
40 associated death during self-isolation. *Int J Legal Med*. 2020;134(4):1285-90.  
41
- 42 54. Tantisattamo E, Reddy UG, Duong DK, Ferrey AJ, Ichii H, Dafoe DC, et al.  
43 Hyponatremia: A Possible Immuno-Neuroendocrine Interface with COVID-19 in a Kidney  
44 Transplant Recipient. *Transplant infectious disease : an official journal of the Transplantation  
45 Society*. 2020:e13355.  
46
- 47 55. Tomelleri A, Sartorelli S, Campochiaro C, Baldissera EM, Dagna L. Impact of COVID-19  
48 pandemic on patients with large-vessel vasculitis in Italy: a monocentric survey. *Annals of the  
49 rheumatic diseases*. 2020.  
50
- 51 56. Trapani D, Marra A, Curigliano G. The experience on coronavirus disease 2019 and  
52 cancer from an oncology hub institution in Milan, Lombardy Region. *European journal of cancer  
53 (Oxford, England : 1990)*. 2020;132:199-206.  
54  
55  
56  
57  
58  
59  
60

- 1  
2  
3 57. Tursi A, Papa A. Impact of anti-tnfalpa antibodies on the risk of Covid-19 and its  
4 severity in patients with inflammatory Bowel Diseases. *Journal of Crohn's & colitis*. 2020.  
5
- 6 58. Verma A, Khorsandi SE, Dolcet A, Prachalias A, Suddle A, Heaton N, et al. Low  
7 prevalence and disease severity of COVID-19 in post liver transplant recipients - a single centre  
8 experience. *Liver international : official journal of the International Association for the Study of*  
9 *the Liver*. 2020.  
10
- 11 59. Vlachodimitropoulou Koumoutsea E, Vivanti AJ, Shehata N, Benachi A, Le Gouez A,  
12 Desconclois C, et al. COVID19 and acute coagulopathy in pregnancy. *Journal of thrombosis*  
13 *and haemostasis : JTH*. 2020.  
14
- 15 60. Warchol I, Debska-Kozłowska A, Karcz-Socha I, Książczyk M, Szymanska K, Lubinski  
16 A. Terra incognita: clinically suspected myocarditis in a patient with severe acute respiratory  
17 syndrome coronavirus 2 infection. *Polish archives of internal medicine*. 2020;130(5):446-8.  
18
- 19 61. Yao L, Wang J, Zhao J. Asymptomatic novel coronavirus infection in pregnant woman in  
20 the third trimester: a case report [J/OL]. *Chin J Perinat Med*. 2020.  
21
- 22 62. Zhao R, Wang H, Xu KJ, Sheng JF. Pregnancy with 2019 Novel Coronavirus: a case  
23 report. *Zhejiang Med J*. 2020;42:303-17.  
24  
25  
26

### 27 **Excluded – wrong population (n=30)**

- 28  
29 1. Auld SC, Caridi-Scheible M, Blum JM, Robichaux C, Kraft C, Jacob JT, et al. ICU and  
30 Ventilator Mortality Among Critically Ill Adults With Coronavirus Disease 2019. *Critical care*  
31 *medicine*. 2020.  
32
- 33 2. Belhadjer Z, Méot M, Bajolle F, Khraiche D, Legendre A, Abakka S, et al. Acute heart  
34 failure in multisystem inflammatory syndrome in children (MIS-C) in the context of global SARS-  
35 CoV-2 pandemic. *Circulation*. 2020.  
36
- 37 3. Bhatraju PK, Ghassemieh BJ, Nichols M, Kim R, Jerome KR, Nalla AK, et al. Covid-19 in  
38 Critically Ill Patients in the Seattle Region - Case Series. *The New England journal of medicine*.  
39 2020;382(21):2012-22.  
40
- 41 4. Cardoso FS, Pereira R, Germano N. Liver injury in critically ill patients with COVID-19: a  
42 case series. *Critical care (London, England)*. 2020;24(1):190.  
43
- 44 5. Collin J, Byström E, Carnahan A, Ahrne M. Public Health Agency of Sweden's Brief  
45 Report: Pregnant and postpartum women with severe acute respiratory syndrome coronavirus 2  
46 infection in intensive care in Sweden. *Acta Obstet Gynecol Scand*. 2020;99(7):819-22.  
47
- 48 6. Fasano A, Cereda E, Barichella M, Cassani E, Ferri V, Zecchinelli AL, et al. COVID-19 in  
49 Parkinson's Disease Patients Living in Lombardy, Italy. *Movement disorders : official journal of*  
50 *the Movement Disorder Society*. 2020.  
51
- 52 7. Fraisse M, Logre E, Pajot O, Mentec H, Plantefève G, Contou D. Thrombotic and  
53 hemorrhagic events in critically ill COVID-19 patients: a French monocenter retrospective study.  
54 *Critical care (London, England)*. 2020;24(1):275.  
55  
56  
57  
58  
59  
60

- 1  
2  
3 8. Helms J, Kremer S, Merdji H, Clere-Jehl R, Schenck M, Kummerlen C, et al. Neurologic  
4 Features in Severe SARS-CoV-2 Infection. *The New England journal of medicine*.  
5 2020;382(23):2268-70.  
6
- 7 9. Kass DA, Duggal P, Cingolani O. Obesity could shift severe COVID-19 disease to  
8 younger ages. *Lancet (London, England)*. 2020;395(10236):1544-5.  
9
- 10 10. Korean Society of Infectious D, Korea Centers for Disease C, Prevention. Analysis on 54  
11 Mortality Cases of Coronavirus Disease 2019 in the Republic of Korea from January 19 to  
12 March 10, 2020. *Journal of Korean medical science*. 2020;35(12):e132.  
13
- 14 11. Lee C-C, Chang JC-Y, Mao X-W, Hsu W-T, Chen S-Y, Chen Y-C, et al. Combining  
15 Procalcitonin and Rapid Multiplex Respiratory Virus Testing for Antibiotic Stewardship in Older  
16 Adult Patients With Severe Acute Respiratory Infection. *Journal of the American Medical*  
17 *Directors Association*. 2020;21(1):62-7.  
18
- 19 12. Lemyze M, Courageux N, Maladobry T, Arumadura C, Pauquet P, Orfi A, et al.  
20 Implications of Obesity for the Management of Severe Coronavirus Disease 2019 Pneumonia.  
21 *Crit Care Med*. 2020.  
22
- 23 13. Llitjos JF, Leclerc M, Chochois C, Monsallier JM, Ramakers M, Auvray M, et al. High  
24 incidence of venous thromboembolic events in anticoagulated severe COVID-19 patients. *J*  
25 *Thromb Haemost*. 2020;18(7):1743-6.  
26
- 27 14. London V, McLaren R, Jr., Atallah F, Cepeda C, McCalla S, Fisher N, et al. The  
28 Relationship between Status at Presentation and Outcomes among Pregnant Women with  
29 COVID-19. *American journal of perinatology*. 2020.  
30
- 31 15. Mahase E. Covid-19: most patients require mechanical ventilation in first 24 hours of  
32 critical care. *BMJ (Clinical research ed)*. 2020;368:m1201.  
33
- 34 16. Marfella R, Paolisso P, Sardu C, Bergamaschi L, D'Angelo EC, Barbieri M, et al.  
35 Negative impact of hyperglycaemia on tocilizumab therapy in Covid-19 patients. *Diabetes &*  
36 *metabolism*. 2020.  
37
- 38 17. Montastruc F, Romano C, Montastruc J-L, Silva S, Seguin T, Minville V, et al.  
39 Pharmacological characteristics of patients infected with SARS-Cov-2 admitted to Intensive  
40 Care Unit in South of France. *Therapie*. 2020.  
41
- 42 18. Nahum J, Morichau-Beauchant T, Daviaud F, Echehut P, Fichet J, Maillet J-M, et al.  
43 Venous Thrombosis Among Critically Ill Patients With Coronavirus Disease 2019 (COVID-19).  
44 *JAMA network open*. 2020;3(5):e2010478.  
45
- 46 19. Pan C, Chen L, Lu C, Zhang W, Xia J-A, Sklar MC, et al. Lung Recruitability in COVID-  
47 19-associated Acute Respiratory Distress Syndrome: A Single-Center Observational Study.  
48 *American journal of respiratory and critical care medicine*. 2020;201(10):1294-7.  
49
- 50 20. Pavoni V, Ganesello L, Pazzi M, Stera C, Meconi T, Frigieri FC. Evaluation of  
51 coagulation function by rotation thromboelastometry in critically ill patients with severe COVID-  
52 19 pneumonia. *J Thromb Thrombolysis*. 2020:1-6.  
53  
54  
55  
56  
57  
58  
59

21. Pedersen HP, Hildebrandt T, Poulsen A, Uslu B, Knudsen HH, Roed J, et al. Initial experiences from patients with COVID-19 on ventilatory support in Denmark. *Danish medical journal*. 2020;67(5).
22. Piva S, Filippini M, Turla F, Cattaneo S, Margola A, De Fulviis S, et al. Clinical presentation and initial management critically ill patients with severe acute respiratory syndrome coronavirus 2 (SARS-CoV-2) infection in Brescia, Italy. *Journal of critical care*. 2020;58:29-33.
23. Saeed U, Sellevoll HB, Young VS, Sandbaek G, Glomsaker T, Mala T. Covid-19 may present with acute abdominal pain. *The British journal of surgery*. 2020;107(7):e186-e7.
24. Sciascia S, Apra F, Baffa A, Baldovino S, Boaro D, Boero R, et al. Pilot prospective open, single-arm multicentre study on off-label use of tocilizumab in patients with severe COVID-19. *Clinical and experimental rheumatology*. 2020;38(3):529-32.
25. Spiezia L, Boscolo A, Poletto F, Cerruti L, Tiberio I, Campello E, et al. COVID-19-Related Severe Hypercoagulability in Patients Admitted to Intensive Care Unit for Acute Respiratory Failure. *Thrombosis and haemostasis*. 2020;120(6):998-1000.
26. Thomas W, Varley J, Johnston A, Symington E, Robinson M, Sheares K, et al. Thrombotic complications of patients admitted to intensive care with COVID-19 at a teaching hospital in the United Kingdom. *Thrombosis research*. 2020;191:76-7.
27. Toniati P, Piva S, Cattalini M, Garrafa E, Regola F, Castelli F, et al. Tocilizumab for the treatment of severe COVID-19 pneumonia with hyperinflammatory syndrome and acute respiratory failure: A single center study of 100 patients in Brescia, Italy. *Autoimmunity reviews*. 2020;19(7):102568.
28. Violi F, Pastori D, Pignatelli P, Cangemi R. SARS-CoV-2 and myocardial injury: a role for Nox2? *Internal and emergency medicine*. 2020.
29. Wright FL, Vogler TO, Moore EE, Moore HB, Wohlaer MV, Urban S, et al. Fibrinolysis Shutdown Correlation with Thromboembolic Events in Severe COVID-19 Infection. *J Am Coll Surg*. 2020.
30. Zangrillo A, Beretta L, Scandroglio AM, Monti G, Fominskiy E, Colombo S, et al. Characteristics, treatment, outcomes and cause of death of invasively ventilated patients with COVID-19 ARDS in Milan, Italy. *Critical care and resuscitation : journal of the Australasian Academy of Critical Care Medicine*. 2020.

#### **Excluded – other study type (n=3)**

1. Adams ML, Katz DL, Grandpre J. Population-based estimates of chronic conditions affecting risk for complications from coronavirus disease, United States. *Emerging infectious diseases*. 2020;26(8).
2. Bar S, Lecourtois A, Diouf M, Goldberg E, Bourbon C, Arnaud E, et al. The association of lung ultrasound images with COVID-19 infection in an emergency room cohort. *Anaesthesia*. 2020.

1  
2  
3 3. Smith-Ray R, Roberts EE, Littleton DE, Singh T, Sandberg T, Taitel M. Distribution of  
4 Patients at Risk for Complications Related to COVID-19 in the United States: Model  
5 Development Study. *JMIR Public Health Surveill.* 2020;6(2):e19606.  
6  
7  
8

9 **Excluded – unusable at data extraction (n=9)**

10  
11 1. Zhu Z, Hasegawa K, Ma B, Fujiogi M, Camargo CA, Jr., Liang L. Association of asthma  
12 and its genetic predisposition with the risk of severe COVID-19. *The Journal of allergy and  
13 clinical immunology.* 2020.  
14

15 2. Targher G, Mantovani A, Byrne CD, Wang X-B, Yan H-D, Sun Q-F, et al. Detrimental  
16 effects of metabolic dysfunction-associated fatty liver disease and increased neutrophil-to-  
17 lymphocyte ratio on severity of COVID-19. *Diabetes & metabolism.* 2020.  
18

19 3. Slaunwhite AK, Gan WQ, Xavier C, Zhao B, Buxton JA, Desai R. Overdose and risk  
20 factors for coronavirus disease 2019. *Drug and alcohol dependence.* 2020;212:108047.  
21

22 4. Oksanen A, Kaakinen M, Latikka R, Savolainen I, Savela N, Koivula A. Regulation and  
23 Trust: 3-Month Follow-up Study on COVID-19 Mortality in 25 European Countries. *JMIR public  
24 health and surveillance.* 2020;6(2):e19218.  
25

26 5. Mahajan UV, Larkins-Pettigrew M. Racial demographics and COVID-19 confirmed cases  
27 and deaths: a correlational analysis of 2886 US counties. *Journal of public health (Oxford,  
28 England).* 2020.  
29

30 6. Lieberman-Cribbin W, Rapp J, Alpert N, Tuminello S, Taioli E. The impact of asthma on  
31 mortality in COVID-19 patients. *Chest.* 2020.  
32

33 7. Kim SJ, Bostwick W. Social Vulnerability and Racial Inequality in COVID-19 Deaths in  
34 Chicago. *Health education & behavior : the official publication of the Society for Public Health  
35 Education.* 2020:1090198120929677.  
36

37 8. Imam Z, Odish F, Armstrong J, Elassar H, Dokter J, Langnas E, et al. Independent  
38 Correlates of Hospitalization in 2040 Patients with COVID-19 at a Large Hospital System in  
39 Michigan, United States. *Journal of general internal medicine.* 2020.  
40

41 9. Ho CS, Chee CY, Ho RC. Mental Health Strategies to Combat the Psychological Impact  
42 of COVID-19 Beyond Paranoia and Panic. *Annals of the Academy of Medicine, Singapore.*  
43 2020;49(3):1-3.  
44

45 **Excluded – other (n=10)**

46  
47 1. Balavoine J-F. Comparer la mortalite du COVID-19 et de l'influenza: tout faux?  
48 2020;16(697):1222.  
49

50 2. Banerjee A, Pasea L, Harris S, Gonzalez-Izquierdo A, Torralbo A, Shallcross L, et al.  
51 Estimating excess 1-year mortality associated with the COVID-19 pandemic according to  
52 underlying conditions and age: a population-based cohort study. *Lancet (London, England).*  
53 2020;395(10238):1715-25.  
54  
55  
56  
57  
58  
59  
60

- 1  
2  
3 3. Chowdhury R, Heng K, Shawon MSR, Goh G, Okonofua D, Ochoa-Rosales C, et al. Dynamic interventions to control COVID-19 pandemic: a multivariate prediction modelling study comparing 16 worldwide countries. *European journal of epidemiology*. 2020;35(5):389-99.
- 4  
5  
6  
7 4. Dehghani P, Davidson LJ, Grines CL, Nayak K, Saw J, Kaul P, et al. North American COVID-19 ST-segment elevation myocardial infarction (NACMI) registry: Rationale, design, and implications. *American heart journal*. 2020.
- 8  
9  
10  
11 5. El-Kurdi B, Khatua B, Rood C, Snozek C, Cartin-Ceba R, Singh VP, et al. MORTALITY FROM COVID-19 INCREASES WITH UNSATURATED FAT, AND MAY BE REDUCED BY EARLY CALCIUM AND ALBUMIN SUPPLEMENTATION. *Gastroenterology*. 2020.
- 12  
13  
14  
15 6. Li D, Croft DP, Ossip DJ, Xie Z. Are Vapers More Susceptible to COVID-19 Infection? *medRxiv : the preprint server for health sciences*. 2020.
- 16  
17  
18 7. Mehra MR, Desai SS, Kuy S, Henry TD, Patel AN. Cardiovascular Disease, Drug Therapy, and Mortality in Covid-19. *The New England journal of medicine*. 2020.
- 19  
20  
21 8. Sakiko T, Kazuo I, Shuichi K, Mayu I, Tatsuya K, Kazuyasu M, et al. Non-severe vs severe symptomatic COVID-19: 104 cases from the outbreak on the cruise ship "Diamond Princess" in Japan. *medRxiv*. 2020.
- 22  
23  
24  
25 9. Testino G, Fagoonee S. Coronavirus disease 2019 outbreak: liver disease a prognostic tool? *Panminerva medica*. 2020.
- 26  
27  
28 10. Unger JM, Blanke CD, LeBlanc M, Hershman DL. Association of the Coronavirus Disease 2019 (COVID-19) Outbreak With Enrollment in Cancer Clinical Trials. *JAMA network open*. 2020;3(6):e2010651.
- 29  
30  
31  
32  
33  
34  
35  
36  
37  
38  
39  
40  
41  
42  
43  
44  
45  
46  
47  
48  
49  
50  
51  
52  
53  
54  
55  
56  
57  
58  
59  
60



1  
2  
3 **Supplement 4.** Characteristics of included studies  
4

| 5<br>6<br>7<br>8<br>9<br>10                              | Author, year;<br>Publication date;<br>Country;<br>Study design;<br>Study period & follow-up           | Enrolled cohort;<br>Study sample;<br>Mean age (SD), years <sup>1</sup><br>Male, proportion                                                                                                                         | COVID-19<br>diagnosis                                                                                  | P <sup>2</sup> ROGRESS risk factors,<br>adjusted for in multivariate<br>regression analysis <sup>2</sup>                                                                                                                                                                                            | Outcomes                | Quality rating &<br>concerns (if any)                                 |
|----------------------------------------------------------|-------------------------------------------------------------------------------------------------------|--------------------------------------------------------------------------------------------------------------------------------------------------------------------------------------------------------------------|--------------------------------------------------------------------------------------------------------|-----------------------------------------------------------------------------------------------------------------------------------------------------------------------------------------------------------------------------------------------------------------------------------------------------|-------------------------|-----------------------------------------------------------------------|
| 11<br>12<br>13<br>14<br>15<br>16<br>17<br>18<br>19<br>20 | Azar K, 2020<br>May 21 (published)<br>USA<br>Retrospective cohort<br>Jan 1-Apr 8                      | Patients ≥18 years old who had at least one encounter at a Sutter facility (integrated health system) during the study period for suspected or confirmed COVID-19 infection<br>N=1,052<br>53 (95% CI 52-54)<br>49% | ICD codes or evidence in lab records (reports suspected cases but confirmed cases analyzed separately) | Pre-existing condition (asthma, cardiovascular disease, cancer, chronic pulmonary disease, congestive heart failure, type II diabetes, hypertension, depression);<br>Place of residence (homeless);<br>Race/ethnicity;<br>Sex;<br>SES (household income);<br>Age;<br>Other factors (smoking status) | Rate of hospitalization | Good;<br>No major concerns                                            |
| 21<br>22<br>23<br>24<br>25<br>26<br>27<br>28<br>29       | Bhargava A, 2020<br>May 30 (published)<br>USA<br>Retrospective cohort<br>Mar 8-Apr 8                  | Adults admitted to a tertiary care urban academic medical center with COVID-19<br>N=197<br>61 (16)<br>52%                                                                                                          | RT-PCR                                                                                                 | Pre-existing condition (renal disease);<br>Sex;<br>Age                                                                                                                                                                                                                                              | Severe disease          | Good;<br>No major concerns                                            |
| 30<br>31<br>32<br>33<br>34<br>35<br>36<br>37<br>38<br>39 | Bianchetti A, 2020<br>May 11 (accepted)<br>Italy<br>Retrospective cohort<br>Study period not reported | Adults admitted to acute medical wards with COVID-19 pneumonia in Brescia<br>N=627<br>71 (13)<br>47%                                                                                                               | RT-PCR                                                                                                 | Pre-existing condition (dementia);<br>Sex;<br>Age                                                                                                                                                                                                                                                   | Mortality               | Fair;<br>Did not report follow-up duration or censorship for outcomes |

|                                                                                                          |                                                                                                                 |                                                                                                                                              |                |                                                                                                               |                                                                                         |                                                                                                                         |
|----------------------------------------------------------------------------------------------------------|-----------------------------------------------------------------------------------------------------------------|----------------------------------------------------------------------------------------------------------------------------------------------|----------------|---------------------------------------------------------------------------------------------------------------|-----------------------------------------------------------------------------------------|-------------------------------------------------------------------------------------------------------------------------|
| 1<br>2<br>3<br>4<br>5<br>6<br>7<br>8<br>9<br>10<br>11<br>12                                              | Borobia A, 2020<br>June 4 (published)<br>Spain<br>Retrospective cohort<br>Feb 25-Apr 19;<br>Follow-up to Apr 19 | Adults $\geq$ 18 years old hospitalized in wards or the ED at a university hospital with COVID-19<br>N=2,226<br>Median 61 (IQR 46-78)<br>48% | Lab-confirmed  | Pre-existing condition (not clearly specified for multivariate analysis);<br>Sex;<br>Age                      | Mortality                                                                               | Fair;<br>No follow-up and censored to patients who died or were discharged by April 19                                  |
| 13<br>14<br>15<br>16<br>17<br>18<br>19<br>20                                                             | Busetto L, 2020<br>May 28 (accepted)<br>Italy<br>Retrospective cohort<br>Mar 14-Apr 11                          | Adults hospitalized in a medical COVID-19 ward with SARS-CoV-2 related pneumonia<br>N=92<br>71 (13)<br>62%                                   | RT-PCR         | Pre-existing condition (BMI/obesity, chronic respiratory disease, dementia, type II diabetes);<br>Sex;<br>Age | ICU admission;<br>Noninvasive ventilation or MV (composite);<br>Mortality (in-hospital) | Fair;<br>Did not report follow-up duration or censorship for outcomes                                                   |
| 21<br>22<br>23<br>24<br>25<br>26<br>27<br>28<br>29                                                       | Cecconi M, 2020<br>May 20 (published)<br>Italy<br>Retrospective cohort<br>Feb 22-Mar 22                         | Adults $\geq$ 18 years old admitted to a hospital with COVID-19<br>N=239<br>64 (14)<br>71%                                                   | Positive assay | Pre-existing condition (coronary heart disease);<br>Age                                                       | ICU admission or mortality (composite)                                                  | Fair;<br>No adjustment for sex and patients were censored as of March 25 (inadequate for patients enrolled on March 22) |
| 30<br>31<br>32<br>33<br>34<br>35<br>36<br>37<br>38<br>39<br>40<br>41<br>42<br>43<br>44<br>45<br>46<br>47 | Colaneri M, 2020<br>Apr 23 (published)<br>Italy<br>Retrospective cohort<br>Feb 21-28;<br>Follow-up to Mar 4     | Patients admitted to a hospital with COVID-19<br>N=44<br>Median 68 (IQR 29)<br>64%                                                           | RT-PCR         | Pre-existing condition (tumor);<br>Sex                                                                        | Severe disease                                                                          | Good;<br>No major concerns                                                                                              |

|                                                                |                                                                                                                                |                                                                                                                                                                                                                                               |                   |                                                                                                                                                                                                                                                                                                                                                                          |                                                                                 |                                                                                      |
|----------------------------------------------------------------|--------------------------------------------------------------------------------------------------------------------------------|-----------------------------------------------------------------------------------------------------------------------------------------------------------------------------------------------------------------------------------------------|-------------------|--------------------------------------------------------------------------------------------------------------------------------------------------------------------------------------------------------------------------------------------------------------------------------------------------------------------------------------------------------------------------|---------------------------------------------------------------------------------|--------------------------------------------------------------------------------------|
| 1<br>2<br>3<br>4<br>5<br>6<br>7<br>8<br>9<br>10<br>11<br>12    | Covino M, 2020<br>May 18 (accepted)<br>Italy<br>retrospective cohort<br>Mar 1-31;<br>Follow-up at 30 days<br>from ED admission | Adults ≥80 years old admitted to ED<br>of urban teaching hospital for<br>suspected COVID-19<br><br>N=69<br><br>Median 84 (IQR 82-89)<br><br>54%                                                                                               | RT-PCR            | Pre-existing condition (severe<br>dementia)                                                                                                                                                                                                                                                                                                                              | Mortality                                                                       | Fair;<br>No adjustment for age<br>or sex, or other pre-<br>existing conditions       |
| 13<br>14<br>15<br>16<br>17<br>18<br>19<br>20<br>21<br>22<br>23 | Cummings MJ, 2020<br>May 19 (published)<br>USA<br>Prospective cohort<br>Mar 2-Apr 1;<br>Follow-up to Apr 28                    | Adults admitted to high-dependency<br>unit (O2) or ICU (MV) of two<br>hospitals in New York with COVID-<br>19 and were critically ill with acute<br>hypoxaemic respiratory failure<br><br>N=257<br><br>Median 62 (IQR 51-72)<br><br>67%       | Lab-<br>confirmed | Pre-existing condition (chronic<br>cardiac disease [coronary artery<br>disease or congestive heart<br>failure], chronic pulmonary<br>disease [chronic obstructive<br>pulmonary disease/interstitial<br>lung disease], diabetes,<br>hypertension);<br>Sex;<br>Age                                                                                                         | Mortality (in-hospital)                                                         | Good;<br>No major concerns                                                           |
| 24<br>25<br>26<br>27<br>28<br>29<br>30<br>31<br>32<br>33<br>34 | Docherty AB, 2020<br>May 15 (accepted)<br>UK<br>Prospective cohort<br>Feb 6-Apr 19;<br>Follow-up at least 2<br>weeks to May 3  | Children and adults admitted to 208<br>acute care hospitals with COVID-19<br>in England, Wales, and Scotland<br><br>N=20,133<br><br>Median 73 (IQR 58-82)<br><br>60%                                                                          | RT-PCR            | Pre-existing condition (chronic<br>cardiac disease, chronic<br>pulmonary disease, asthma,<br>CKD, DM, obesity, chronic<br>neurological disorder, dementia,<br>malignancy, moderate/severe<br>liver disease, mild liver disease,<br>chronic hematologic disease,<br>rheumatologic disorder,<br>HIV/AIDS, malnutrition);<br>Sex;<br>Age;<br>Other factors (smoking status) | Mortality (in-hospital)                                                         | Good;<br>No major concerns                                                           |
| 35<br>36<br>37<br>38<br>39<br>40<br>41                         | D'Silva K, 2020<br>May 18 (accepted)<br>USA<br>Retrospective cohort                                                            | Patients seen at PHS who were ≥18<br>years of age and had a positive test<br>result for SARS-CoV-2 by PCR<br>clinical assay. *PHS is a large<br>healthcare system that includes<br>tertiary care hospitals<br>(Massachusetts General Hospital | PCR               | Pre-existing condition<br>(rheumatic disease)                                                                                                                                                                                                                                                                                                                            | Rate of hospitalization;<br>ICU admission/ or MV (all<br>with MV);<br>Mortality | Fair;<br>No adjustment for sex,<br>and mortality only<br>adjusted for age and<br>BMI |

|                                                          |                                                                                                                                           |                                                                                                                                                                                                                                                             |                                  |                                                                                                                                                                                                                                                                                                                                                 |                                                   |                            |
|----------------------------------------------------------|-------------------------------------------------------------------------------------------------------------------------------------------|-------------------------------------------------------------------------------------------------------------------------------------------------------------------------------------------------------------------------------------------------------------|----------------------------------|-------------------------------------------------------------------------------------------------------------------------------------------------------------------------------------------------------------------------------------------------------------------------------------------------------------------------------------------------|---------------------------------------------------|----------------------------|
| 1<br>2<br>3<br>4<br>5<br>6<br>7<br>8<br>9<br>10<br>11    | Mar 1-Apr 8;<br>Follow-up averaged 29<br>days                                                                                             | and Brigham and Women's<br>Hospital), community hospitals and<br>primary and specialty outpatient<br>centres in the greater Boston<br><br>N=156<br><br>63 (15)<br><br>31%                                                                                   |                                  |                                                                                                                                                                                                                                                                                                                                                 |                                                   |                            |
| 12<br>13<br>14<br>15<br>16<br>17<br>18<br>19<br>20<br>21 | El-Boghdady K, 2020<br><br>June 9 (accepted)<br><br>Multi-country<br><br>Prospective cohort<br><br>Mar 23-Jun 2                           | Healthcare workers from 503<br>hospitals in 17 countries who<br>performed tracheal intubations, with<br>data for new COVID-19 infection or<br>new COVID-19 symptoms requiring<br>self-isolation or hospitalization.<br><br>N=1,718<br><br>42 (9)<br><br>60% | Lab-<br>confirmed or<br>symptoms | Occupation<br>(intubator/laryngologist vs.<br>assistant);<br>Sex                                                                                                                                                                                                                                                                                | Self-isolation/<br>hospitalization<br>(composite) | Good;<br>No major concerns |
| 22<br>23<br>24<br>25<br>26<br>27<br>28<br>29<br>30<br>31 | Giacomelli A, 2020<br><br>May 22 (published)<br><br>Italy<br><br>Prospective cohort<br><br>Feb 21-Mar 19;<br>Follow-up to Apr 20          | Adults hospitalized at one hospital<br>with COVID-19<br><br>N=233<br><br>Median 61 (IQR 50-72)<br><br>62%                                                                                                                                                   | RT-PCR                           | Pre-existing condition (age<br>unadjusted Charlson<br>Comorbidity Index, obesity,<br>anemia);<br>Sex;<br>Age                                                                                                                                                                                                                                    | Mortality                                         | Good;<br>No major concerns |
| 32<br>33<br>34<br>35<br>36<br>37<br>38<br>39<br>40<br>41 | Gold J, 2020<br><br>May 8 (published,<br>MMWR weekly report)<br><br>USA<br><br>Prospective cohort<br><br>Mar 1-30;<br>Follow-up to Apr 28 | Adults ≥18 years old hospitalized at<br>eight hospitals with COVID-19<br><br>N=305<br><br>Median 60 (IQR 46-69)<br><br>49%                                                                                                                                  | Lab-<br>confirmed                | Pre-existing condition (obesity,<br>diabetes, cardiovascular<br>disease, coronary artery<br>disease, congenital heart<br>disease, arrhythmia, chronic<br>lung disease, asthma, chronic<br>obstructive pulmonary disease,<br>immunocompromising<br>conditions/therapies, end-stage<br>renal disease on dialysis, liver<br>disease, hypertension, | MV or mortality (composite)                       | Good;<br>No major concerns |

|                                                                                                                         |                                                                                                                                    |        |                                                                                                                                                |                                                  |                                                                                                                                                            |
|-------------------------------------------------------------------------------------------------------------------------|------------------------------------------------------------------------------------------------------------------------------------|--------|------------------------------------------------------------------------------------------------------------------------------------------------|--------------------------------------------------|------------------------------------------------------------------------------------------------------------------------------------------------------------|
|                                                                                                                         |                                                                                                                                    |        | neurologic disorder, chronic liver disease without dialysis, cancer, rheumatologic or autoimmune condition);<br>Race/ethnicity;<br>Sex;<br>Age |                                                  |                                                                                                                                                            |
| Hajifathalian K, 2020 (#163)<br>May 29 (accepted)<br>USA<br>Retrospective cohort<br>Mar 4-Apr 9;<br>Follow-up to Apr 16 | Adults $\geq 18$ years old with and without obesity hospitalized in ED or inpatient wards with COVID-19<br>N=770<br>64 (17)<br>61% | RT-PCR | Pre-existing condition (obesity)                                                                                                               | ICU admission;<br>MV;<br>Mortality (in-hospital) | Fair;<br>No adjustment for sex, and 7-day follow-up inadequate for mortality                                                                               |
| Hajifathalian K, 2020 (#1154)<br>May 1 (accepted)<br>USA<br>Retrospective cohort<br>Mar 4-Apr 9                         | Adults with SARS-CoV-2<br>N=1,059<br>61 (18)<br>58%                                                                                | RT-PCR | Pre-existing condition (number of comorbidities);<br>Age                                                                                       | ICU admission or mortality (composite)           | Fair;<br>Unclear if adjustment for sex, and did not report follow-up duration or censorship for outcomes                                                   |
| Hamer M, 2020<br>May 23 (published)<br>UK<br>Prospective cohort<br>Mar 16-Apr 26                                        | Adults in the community<br>N=387,109<br>56 (8)<br>45%                                                                              | RT-PCR | Pre-existing condition (overweight, obesity);<br>Other factors (smoking status, level of alcohol consumption, level of physical activity)      | Rate of hospitalization                          | Fair;<br>One of three publications reporting on same or similar population, significant amount of missing data and data on risk factors are from 2006-2010 |
| Hur K, 2020<br>May 20 (accepted)                                                                                        | Patients hospitalized with laboratory-confirmed COVID-19 infection admitted to any of the 10                                       | RT-PCR | Pre-existing condition (obesity, diabetes, hypertension);                                                                                      | MV                                               | Good;<br>No major concerns                                                                                                                                 |

|                                                                                                                     |                                                                                                                                                                                                                                                                                                                                             |        |                                                                                                                        |                         |                                                                                                                                                                                                               |
|---------------------------------------------------------------------------------------------------------------------|---------------------------------------------------------------------------------------------------------------------------------------------------------------------------------------------------------------------------------------------------------------------------------------------------------------------------------------------|--------|------------------------------------------------------------------------------------------------------------------------|-------------------------|---------------------------------------------------------------------------------------------------------------------------------------------------------------------------------------------------------------|
| USA<br>Retrospective cohort<br>Mar 1-Apr 8;<br>Follow-up to Apr 18                                                  | hospitals in the Northw estern Memorial HealthCare system spread across the Chicago metropolitan area<br><br>N=486<br><br>Median 59 (IQR 19-101)<br><br>56%                                                                                                                                                                                 |        | Place of residence (suburban vs. urban hospital);<br>Race/ethnicity;<br>Sex;<br>Age;<br>Other factors (smoking status) |                         |                                                                                                                                                                                                               |
| Imam Z, 2020<br>June 4 (published)<br>USA<br>Retrospective cohort<br>Mar 1-Apr 17;<br>outcome analysis ended Apr 17 | Individuals that were hospitalized at a hospital w ithin Beaumont Health w ith SARS-CoV-2 infection demonstrated by a positive RT-PCR on nasopharyngeal sw ab per world health organization (WHO)guidance<br><br>N=1,305<br><br>61 (16)<br><br>54%                                                                                          | RT-PCR | Pre-existing condition (Charlson Comorbidity Index >3);<br>Age                                                         | Mortality (in-hospital) | Fair;<br>Adjustment for Charlson Comorbidity Index score (>3) despite individual comorbidities being significant at univariate analysis, and some missing data for ethnicity (n=5) and smoking status (n=240) |
| Kalligeros M, 2020<br>June 12 (published)<br>USA<br>Retrospective cohort<br>Feb 17-Apr 5                            | All consecutive adult (≥18 years old) patients w ho had a laboratory confirmed (using a reverse transcriptase–polymerase chain reaction assay) SARS-CoV-2 infection and w ho were hospitalized at the Rhode Island Hospital, The Miriam Hospital, or New port Hospital in Rhode Island<br><br>N=103<br><br>Median 60 (IQR 50-72)<br><br>61% | RT-PCR | Pre-existing condition (obesity, diabetes, hypertension, heart disease, lung disease);                                 | ICU admission;<br>MV    | Good;<br>No major concerns                                                                                                                                                                                    |
| Klang E, 2020<br>May 23 (accepted)                                                                                  | Adults hospitalized at five academic hospitals w ith COVID-19 w ith BMI information                                                                                                                                                                                                                                                         | PCR    | Pre-existing condition (obesity, diabetes, heart disease, hypertension, lung disease);<br>Race/ethnicity;              | Mortality (in-hospital) | Fair;<br>Did not report follow-up duration or censorship for outcomes, and a                                                                                                                                  |

|                                                                                                             |                                                                                                                                                                                                      |               |                                                                                                                                                                                                                                                                                                                                                                                   |                                |                                                                                                                                                            |
|-------------------------------------------------------------------------------------------------------------|------------------------------------------------------------------------------------------------------------------------------------------------------------------------------------------------------|---------------|-----------------------------------------------------------------------------------------------------------------------------------------------------------------------------------------------------------------------------------------------------------------------------------------------------------------------------------------------------------------------------------|--------------------------------|------------------------------------------------------------------------------------------------------------------------------------------------------------|
| USA<br>Retrospective cohort<br>Mar 1-May 17                                                                 | N=3,406<br>Range 34 to 84 y<br>58%                                                                                                                                                                   |               | Sex;<br>Age                                                                                                                                                                                                                                                                                                                                                                       |                                | large number of patients who were still hospitalized at time of analysis were excluded (n=1,047)                                                           |
| Lassale C, 2020<br>May 28 (accepted)<br>UK<br>Prospective cohort<br>Mar 16-Apr 26                           | Adults in the community<br>N=340,966<br>56 (8)<br>45%                                                                                                                                                | RT-PCR        | Pre-existing condition (obesity, cardiovascular disease, chronic bronchitis, ever seen a psychiatrist);<br>Place of residence (number in household);<br>Race/ethnicity;<br>Sex;<br>Education/literacy level (university degree vs. lower education);<br>SES (Townsend index);<br>Age;<br>Other factors (smoking status, level of alcohol consumption, level of physical activity) | Rate of hospitalization        | Fair;<br>One of three publications reporting on same or similar population, significant amount of missing data and data on risk factors are from 2006-2010 |
| Okoh A, 2020<br>June 10 (published)<br>USA<br>Retrospective cohort<br>Mar 10-Apr 10;<br>Follow-up to Apr 20 | Adults ≥18 years old of Black/African American or Latino/Hispanic ethnicity hospitalised at a quaternary care teaching hospital in New Jersey with COVID-19<br>N=251<br>Median 62 (IQR 49-74)<br>51% | RT-PCR        | Pre-existing condition (coronary artery disease, chronic kidney disease, hypertension, HIV);<br>Race/ethnicity;<br>Sex;<br>Age                                                                                                                                                                                                                                                    | Mortality (in-hospital)        | Good;<br>No major concerns                                                                                                                                 |
| Palaiodimos L, 2020<br>May 14 (accepted)<br>USA<br>Retrospective cohort                                     | Adults (first 200) admitted to the inpatient medicine service or the ICU of a tertiary academic institution with COVID-19<br>N=200                                                                   | Lab-confirmed | Pre-existing condition (overweight, obesity, coronary artery disease, chronic kidney disease or end-stage renal disease, chronic obstructive pulmonary disease, diabetes,                                                                                                                                                                                                         | MV;<br>Mortality (in-hospital) | Good;<br>No major concerns                                                                                                                                 |

|                                                                                                                                                   |                                                                                                                                              |        |                                                                                                                                                                                                                                                                                                                                                                                                                                |                                                                        |                                                                                                                                                                                  |
|---------------------------------------------------------------------------------------------------------------------------------------------------|----------------------------------------------------------------------------------------------------------------------------------------------|--------|--------------------------------------------------------------------------------------------------------------------------------------------------------------------------------------------------------------------------------------------------------------------------------------------------------------------------------------------------------------------------------------------------------------------------------|------------------------------------------------------------------------|----------------------------------------------------------------------------------------------------------------------------------------------------------------------------------|
| Mar 9-Mar 22;<br>Follow-up 3 weeks to<br>Apr 12                                                                                                   | Median 64 (IQR 50-74)<br><br>49%                                                                                                             |        | heart failure, hyperlipidemia,<br>obstructive sleep apnea;<br>Sex;<br>Age;<br>Other factors (smoking status)                                                                                                                                                                                                                                                                                                                   |                                                                        |                                                                                                                                                                                  |
| Patel AP, 2020<br><br>July 6 (published, letter)<br><br>UK<br><br>Prospective cohort<br><br>Mar 16-Apr 14                                         | Adults who were enrolled in a<br>national health database<br><br>N=418,794<br><br>66 (SD not reported)<br><br>45%                            | PCR    | Pre-existing condition (obesity,<br>chronic obstructive pulmonary<br>disease, coronary artery<br>disease, diabetes, chronic<br>kidney disease, heart failure,<br>hypertension, ischemic stroke,<br>previous pneumonia,<br>Alzheimer's or dementia);<br>Race/ethnicity;<br>Sex;<br>SES (Townsend index, average<br>income);<br>Age;<br>Other factors (smoking status)                                                           | Rate of hospitalization                                                | Fair;<br>One of three<br>publications reporting<br>on same or similar<br>population, significant<br>amount of missing data<br>and data on risk<br>factors are from 2006-<br>2010 |
| Perez-Guzman PN,<br>2020<br><br>April 29 (published,<br>report)<br><br>UK<br><br>retrospective cohort<br><br>Feb 25-Apr 5;<br>Follow-up to Apr 19 | Adults hospitalized at three<br>hospitals (with a multi-ethnic<br>catchment) with COVID-19<br><br>N=520<br><br>Median 67 (IQR 26)<br><br>62% | RT-PCR | Pre-existing condition<br>(Elixhauser score, obesity,<br>diabetes, ischaemic heart,<br>hypertension, hyperlipidemia,<br>chronic heart failure, stroke,<br>asthma, chronic obstructive<br>pulmonary disease, dementia,<br>chronic kidney disease,<br>dementia, solid tumor, liver non-<br>cirrhotic, liver cirrhotic, atrial<br>fibrillation, deep vein<br>thrombosis/pulmonary<br>embolism);<br>Race/ethnicity;<br>Sex;<br>Age | Mortality (in-hospital)                                                | Good;<br>No major concerns                                                                                                                                                       |
| Petrilli CM, 2020<br><br>May 14 (accepted)<br><br>USA<br><br>Prospective cohort                                                                   | Adults tested for SARS-CoV-2 from<br>260 outpatient office sites and 4<br>acute care hospitals<br><br>N=5,279<br><br>Median 54 (IQR 38-66)   | RT-PCR | Pre-existing condition (obesity,<br>asthma or chronic obstructive<br>pulmonary disease, chronic<br>lung disease, coronary artery<br>disease, diabetes, heart failure,<br>hyperlipidemia, hypertension,<br>cancer);<br>Race/ethnicity;                                                                                                                                                                                          | Rate of hospitalization;<br>Severe disease;<br>Mortality (in-hospital) | Good;<br>No major concerns                                                                                                                                                       |



|                                                                |                                                                                                                                                  |                                                                                                                                                                      |               |                                                                                                                                                             |                                                     |                                                                                                                                                                                         |
|----------------------------------------------------------------|--------------------------------------------------------------------------------------------------------------------------------------------------|----------------------------------------------------------------------------------------------------------------------------------------------------------------------|---------------|-------------------------------------------------------------------------------------------------------------------------------------------------------------|-----------------------------------------------------|-----------------------------------------------------------------------------------------------------------------------------------------------------------------------------------------|
| 1<br>2<br>3<br>4<br>5<br>6                                     | Mar 1-Apr 8;<br>Follow-up to May 5                                                                                                               | 50%                                                                                                                                                                  |               | Sex;<br>Age;<br>Other factors (smoking status)                                                                                                              |                                                     |                                                                                                                                                                                         |
| 7<br>8<br>9<br>10<br>11<br>12<br>13<br>14<br>15                | Piano S, 2020<br><br>June 11 (published)<br><br>Italy<br><br>Retrospective cohort<br><br>Feb 22-Apr 8                                            | Non-critically ill patients hospitalized with COVID-19 in five internal medicine COVID unit in two regions of Northern Italy<br><br>N=565<br><br>66 (15)<br><br>63%  | RT-PCR        | Pre-existing condition (liver function, Charlson Comorbidity Index);<br>Gender;<br>Age                                                                      | Transfer to ICU or mortality (composite)            | Good;<br>No major concerns                                                                                                                                                              |
| 16<br>17<br>18<br>19<br>20<br>21<br>22<br>23<br>24<br>25<br>26 | Price-Haywood EG, 2020<br><br>May 27 (published)<br><br>USA<br><br>Retrospective cohort<br><br>Mar 1-Apr 11;<br>Follow-up to May 7 for mortality | Adults attending integrated-delivery health system who tested positive for SARS-CoV-2<br><br>N=3,481<br><br>54 (17)<br><br>40%                                       | PCR           | Pre-existing condition (Charlson Comorbidity Index score, obesity);<br>Place of residence (residence in low-income area);<br>Race/ethnicity;<br>Sex;<br>Age | Rate of hospitalization;<br>Mortality (in-hospital) | Good;<br>No major concerns                                                                                                                                                              |
| 27<br>28<br>29<br>30<br>31<br>32<br>33<br>34<br>35<br>36       | Public Health England<br><br>June (published)<br><br>UK<br><br>Retrospective cohort<br><br>Mar 20-May 13                                         | Patients admitted to hospital (ward or critical care) with COVID-19<br><br>N=130,091<br><br>No aggregate data for age (range 2% at <20 y to 29% at ≥80 y)<br><br>47% | Lab-confirmed | Race/ethnicity;<br>SES (deprivation);<br>Sex;<br>Age                                                                                                        | Mortality                                           | Fair;<br>No adjustment for pre-existing condition(s), and data for risk factors are derived from a 2011 census with some missing data for sex (n=10), age (n=38), and ethnicity (2,024) |
| 37<br>38<br>39<br>40<br>41<br>42                               | Shah V, 2020<br><br>June 11 (accepted)<br><br>UK                                                                                                 | Haemato-oncology patients and patients without underlying haematological malignancies (first 80) admitted to the hospital with COVID-19                              | RT-PCR        | Sex;<br>Age                                                                                                                                                 | Mortality                                           | Fair;<br>Adjusted for age and sex only, and no explanation of discrepancy in cohort                                                                                                     |

|                                                                                       |                                                                                                                                  |                                                                                                                                                                                                                                                                                                                                                                                        |                                        |                                                                                                                                                                                                                                                                                                                              |                                       |                                             |
|---------------------------------------------------------------------------------------|----------------------------------------------------------------------------------------------------------------------------------|----------------------------------------------------------------------------------------------------------------------------------------------------------------------------------------------------------------------------------------------------------------------------------------------------------------------------------------------------------------------------------------|----------------------------------------|------------------------------------------------------------------------------------------------------------------------------------------------------------------------------------------------------------------------------------------------------------------------------------------------------------------------------|---------------------------------------|---------------------------------------------|
| 1<br>2<br>3<br>4<br>5<br>6<br>7<br>8                                                  | Retrospective cohort<br><br>Until April 15;<br>Follow-up of 30 days                                                              | N=1,183<br><br>Median 71 (IQR 57-82)<br><br>58%                                                                                                                                                                                                                                                                                                                                        |                                        |                                                                                                                                                                                                                                                                                                                              |                                       | sample size change during study (80 and 68) |
| 9<br>10<br>11<br>12<br>13<br>14<br>15<br>16<br>17<br>18<br>19<br>20<br>21<br>22<br>23 | Singh S, 2020 (#121)<br><br>June 2 (accepted)<br><br>USA<br><br>Retrospective cohort<br><br>Jan 20-May 26                        | Inflammatory bowel disease (IBD) patients diagnosed with COVID-19 and patients diagnosed with COVID-19 and who had no history of or documentation of a diagnosis of IBD ever were included in the non-IBD control group.<br><br>N=464<br><br>No aggregate data for age (IBD vs. non-IBD: mean 51 y [18] vs. 50 y [19])<br><br>No aggregate data for sex (IBD vs. non-IBD: 37% vs. 45%) | Lab-confirmed or ICD code for COVID-19 | Pre-existing condition (obesity, essential hypertension, chronic lower respiratory diseases [asthma and chronic obstructive pulmonary disease], diabetes, ischemic heart disease, chronic kidney disease, heart failure, cerebrovascular disease);<br>Race/ethnicity;<br>Sex;<br>Age;<br>Other factors (nicotine dependency) | Rate of hospitalization;<br>Mortality | Good;<br>No major concerns                  |
| 24<br>25<br>26<br>27<br>28<br>29<br>30<br>31<br>32<br>33<br>34<br>35                  | Singh S, 2020 (#1201)<br><br>Apr 28 (accepted)<br><br>USA<br><br>Retrospective cohort<br><br>Apr 12 (search for patient records) | Patients ≥10 years old with COVID-19, with and without pre-existing liver disease, who presented to a health care organization<br><br>N=2,780<br><br>No aggregate data for age (liver disease vs. non-liver disease: mean 55 y [15] vs. 52 y [18])<br><br>38%                                                                                                                          | ICD codes per CDC guidelines           | Pre-existing condition (obesity, diabetes, hypertension, liver disease with cirrhosis, liver disease without cirrhosis);<br>Race/ethnicity;<br>Age;<br>Other factors (nicotine use)                                                                                                                                          | Rate of hospitalisation;<br>Mortality | Good;<br>No major concerns                  |
| 36<br>37<br>38<br>39<br>40                                                            | Violi F, 2020<br><br>June 22 (published)<br><br>Italy                                                                            | Consecutively hospitalized adult (≥18 years) patients with laboratory-confirmed COVID-19 and severe acute respiratory syndrome coronavirus-2 (SARS-CoV2)-related                                                                                                                                                                                                                       | RT-PCR                                 | Pre-existing condition (heart failure);<br>Age                                                                                                                                                                                                                                                                               | Mortality (in-hospital)               | Good;<br>No major concerns                  |

1  
2  
3  
4  
5  
6  
7  
8  
9  
10  
11  
12  
13  
14  
15  
16  
17  
18  
19  
20  
21  
22  
23  
24  
25  
26  
27  
28  
29  
30  
31  
32  
33  
34  
35  
36  
37  
38  
39  
40  
41  
42  
43  
44  
45  
46  
47

|                                                                                                    |                                                                                                                                                                                                                                        |  |  |  |  |
|----------------------------------------------------------------------------------------------------|----------------------------------------------------------------------------------------------------------------------------------------------------------------------------------------------------------------------------------------|--|--|--|--|
| <p>Retrospective cohort</p> <p>Mar-Apr;<br/>Follow-up of 19 days<br/>(median, IQR: 12–27 days)</p> | <p>pneumonia, requiring or not mechanical ventilation.</p> <p>N=319</p> <p>No aggregate data for age (survivors vs. non-survivors: mean 66 y vs. 77 y)</p> <p>No aggregate data for sex (survivors vs. non-survivors: 58% vs. 70%)</p> |  |  |  |  |
|----------------------------------------------------------------------------------------------------|----------------------------------------------------------------------------------------------------------------------------------------------------------------------------------------------------------------------------------------|--|--|--|--|

<sup>1</sup> values for age are mean (SD), unless otherwise denoted

<sup>2</sup> risk factors adjusted for in multivariate analysis may differ for outcome(s) reported within a study

CDC: Centers for Disease Control and Prevention; COVID-19: novel coronavirus; ICD: International Classification of Diseases; IQR: interquartile range; MV: mechanical ventilation; RT-PCR/PCR: reverse transcriptase polymerase chain reaction/polymerase chain reaction; SD: standard deviation; SES: socio-economic status; UK: United Kingdom; USA: United States of America; vs.: versus; y: year(s)

Preprint  
review only

**Supplement 5.** All results data from the included studies**Contents**

| <b>Table</b> | <b>P<sup>2</sup>ROGRESS and Other Factors</b>             | <b>Page</b> |
|--------------|-----------------------------------------------------------|-------------|
| 1            | Pre-existing condition: Body mass index and weight        | 85          |
| 2            | Pre-existing condition: Pre-existing disease, unspecified | 87          |
| 3            | Pre-existing condition: Respiratory disease               | 88          |
| 4            | Pre-existing condition: Cardiovascular disease            | 90          |
| 5            | Pre-existing condition: Endocrine disease                 | 92          |
| 6            | Pre-existing condition: Hepatic disease                   | 93          |
| 7            | Pre-existing condition: Renal disease                     | 94          |
| 8            | Pre-existing condition: Gastrointestinal disease          | 95          |
| 9            | Pre-existing condition: Neurological disease              | 96          |
| 10           | Pre-existing condition: Malignancy                        | 97          |
| 11           | Pre-existing condition: Immunocompromised                 | 98          |
| 12           | Pre-existing condition: Mental health                     | 99          |
| 13           | Place/state of residence                                  | 100         |
| 14           | Race/ethnicity                                            | 101         |
| 15           | Occupation                                                | 103         |
| 16           | Gender identity/sex                                       | 104         |
| 17           | Education/literacy level                                  | 106         |
| 18           | Socio-economic status                                     | 107         |
| 19           | Age                                                       | 109         |
| 20           | Other                                                     | 112         |

Table 1. Body mass index (BMI) and weight

| Risk factor;<br>Outcome among<br>population                                    | Study                           | Total<br>number of<br>patients | Adjusted<br>odds<br>ratio* | 95% CI<br>lower<br>bound | 95% CI<br>upper<br>bound | p-value          | Quality<br>rating |
|--------------------------------------------------------------------------------|---------------------------------|--------------------------------|----------------------------|--------------------------|--------------------------|------------------|-------------------|
| <b>BMI unspecified</b>                                                         |                                 |                                |                            |                          |                          |                  |                   |
| <b>Hospitalization</b>                                                         |                                 |                                |                            |                          |                          |                  |                   |
| community sample                                                               | Lassale C (UK; pc)              | 340,966                        | <b>1.03</b>                | <b>1.02</b>              | <b>1.05</b>              | <b>&lt;0.001</b> | Fair              |
| community sample                                                               | Patel AP (UK; pc)               | 418,794                        | <b>1.04</b>                | <b>1.03</b>              | <b>1.06</b>              | <b>&lt;0.001</b> | Fair              |
| <b>Underweight (BMI &lt;18.5) vs. normal weight (BMI &lt;25)</b>               |                                 |                                |                            |                          |                          |                  |                   |
| <b>ICU admission</b>                                                           |                                 |                                |                            |                          |                          |                  |                   |
| hospitalized with COVID-19                                                     | Hajifathalian (USA; rc)<br>#163 | 770                            | aRR 0.68                   | 0.21                     | 2.17                     | 0.519            | Fair              |
| <b>Mechanical ventilation</b>                                                  |                                 |                                |                            |                          |                          |                  |                   |
| hospitalized with COVID-19                                                     | Hajifathalian (USA; rc)<br>#163 | 770                            | aRR 0.48                   | 0.11                     | 2.12                     | 0.333            | Fair              |
| hospitalized with COVID-19                                                     | Palaiodimos L (USA; rc)         | 200                            | 0.76                       | 0.26                     | 2.22                     | 0.613            | Good              |
| <b>Mortality</b>                                                               |                                 |                                |                            |                          |                          |                  |                   |
| hospitalized with COVID-19                                                     | Hajifathalian (USA; rc)<br>#163 | 770                            | aRR 1.64                   | 0.84                     | 3.19                     | 0.145            | Fair              |
| hospitalized with COVID-19                                                     | Palaiodimos L (USA; rc)         | 200                            | 1.37                       | 0.52                     | 3.64                     | 0.527            | Good              |
| <b>Overweight (BMI 25-29.9) vs. normal weight (BMI &lt;25)**</b>               |                                 |                                |                            |                          |                          |                  |                   |
| <b>Hospitalization</b>                                                         |                                 |                                |                            |                          |                          |                  |                   |
| community sample positive<br>for COVID-19                                      | Hamer (UK; pc)                  | 387,109                        | <b>aRR 1.32</b>            | <b>1.09</b>              | <b>1.6</b>               | <b>NR</b>        | Fair              |
| positive for COVID-19                                                          | Petrilli CM (USA; pc)           | 5,279                          | <b>1.3</b>                 | <b>1.07</b>              | <b>1.57</b>              | <b>0.007</b>     | Good              |
| <b>Severe disease</b>                                                          |                                 |                                |                            |                          |                          |                  |                   |
| hospitalized with COVID-19                                                     | Petrilli CM (USA; pc)           | 2,725                          | 0.94                       | 0.73                     | 1.2                      | 0.65             | Good              |
| <b>ICU admission</b>                                                           |                                 |                                |                            |                          |                          |                  |                   |
| hospitalized with COVID-19                                                     | Busetto L (Italy; rc)           | 92                             | <b>11.65</b>               | <b>3.88</b>              | <b>34.96</b>             | <b>&lt;0.001</b> | Fair              |
| hospitalized with COVID-19                                                     | Kalligeros M (USA; rc)          | 103                            | 2.27                       | 0.59                     | 8.83                     | 0.235            | Good              |
| <b>Mechanical ventilation</b>                                                  |                                 |                                |                            |                          |                          |                  |                   |
| ventilation (non-invasive +<br>mechanical) among<br>hospitalized with COVID-19 | Busetto L (Italy; rc)           | 92                             | <b>4.19</b>                | <b>1.36</b>              | <b>12.89</b>             | <b>0.012</b>     | Fair              |
| hospitalized with COVID-19                                                     | Kalligeros M (USA; rc)          | 103                            | 3.7                        | 0.6                      | 22.87                    | 0.159            | Good              |
| <b>Mortality</b>                                                               |                                 |                                |                            |                          |                          |                  |                   |
| hospitalized with COVID-19                                                     | Busetto L (Italy; rc)           | 92                             | 0.27                       | 0.03                     | 2.05                     | 0.204            | Fair              |
| hospitalized with COVID-19                                                     | Petrilli CM (USA; pc)           | 2,725                          | 1.01                       | 0.82                     | 1.25                     | 0.94             | Good              |
| <b>Obese class I or greater (BMI ≥30) vs. normal weight (BMI &lt;30)**</b>     |                                 |                                |                            |                          |                          |                  |                   |
| <b>Hospitalization</b>                                                         |                                 |                                |                            |                          |                          |                  |                   |
| community sample positive<br>for COVID-19                                      | Hamer (UK; pc)                  | 387,109                        | <b>aRR 1.97</b>            | <b>1.61</b>              | <b>2.42</b>              | <b>NR</b>        | Fair              |
| positive for COVID-19                                                          | Price-Haywood EG (USA;<br>rc)   | 3,481                          | <b>1.43</b>                | <b>1.2</b>               | <b>1.71</b>              | <b>NR</b>        | Fair              |
| positive for COVID-19                                                          | Petrilli CM (USA; pc)           | 5,279                          | <b>1.8</b>                 | <b>1.47</b>              | <b>2.2</b>               | <b>&lt;0.001</b> | Good              |
| <b>Severe disease</b>                                                          |                                 |                                |                            |                          |                          |                  |                   |
| hospitalized with COVID-19                                                     | Petrilli CM (USA; pc)           | 2,725                          | 1.11                       | 0.85                     | 1.5                      | 0.44             | Good              |

| Risk factor;<br>Outcome among<br>population                       | Study                           | Total<br>number of<br>patients | Adjusted<br>odds<br>ratio* | 95% CI<br>lower<br>bound | 95% CI<br>upper<br>bound | p-value | Quality<br>rating |
|-------------------------------------------------------------------|---------------------------------|--------------------------------|----------------------------|--------------------------|--------------------------|---------|-------------------|
| <b>ICU admission</b>                                              |                                 |                                |                            |                          |                          |         |                   |
| hospitalized with COVID-19                                        | Hajifathalian (USA; rc)<br>#163 | 770                            | aRR 1.76                   | 1.24                     | 2.48                     | 0.001   | Fair              |
| hospitalized with COVID-19<br>(BMI 30-34.9)                       | Kalligeros M (USA; rc)          | 103                            | 2.65                       | 0.64                     | 10.95                    | 0.178   | Good              |
| hospitalized with COVID-19<br>(BMI ≥35)                           | Kalligeros M (USA; rc)          | 103                            | 5.39                       | 1.13                     | 25.64                    | 0.034   | Good              |
| <b>Mechanical ventilation</b>                                     |                                 |                                |                            |                          |                          |         |                   |
| hospitalized with COVID-19                                        | Hajifathalian (USA; rc)<br>#163 | 770                            | aRR 1.72                   | 1.22                     | 2.44                     | 0.002   | Fair              |
| hospitalized with COVID-19                                        | Kalligeros M (USA; rc)          | 103                            | 6.85                       | 1.05                     | 44.82                    | 0.045   | Good              |
| hospitalized with COVID-19                                        | Hur K (USA; rc)                 | 486                            | 1.46                       | 0.87                     | 2.46                     | 0.151   | Good              |
| hospitalized with COVID-19                                        | Kalligeros M (USA; rc)          | 103                            | 9.99                       | 1.39                     | 71.69                    | 0.022   | Good              |
| hospitalized with COVID-19                                        | Palaiodimos L (USA; rc)         | 200                            | 3.87                       | 1.47                     | 10.18                    | 0.006   | Good              |
| <b>Mortality</b>                                                  |                                 |                                |                            |                          |                          |         |                   |
| hospitalized with COVID-19                                        | Hajifathalian (USA; rc)<br>#163 | 770                            | aRR 1.15                   | 0.62                     | 2.14                     | 0.663   | Fair              |
| hospitalized with COVID-19                                        | Giacomelli A (Italy; pc)        | 233                            | aHR 3.04                   | 1.42                     | 6.49                     | 0.004   | Good              |
| hospitalized with COVID-19                                        | Price-Haywood EG (USA;<br>rc)   | 1,382                          | aHR 0.99                   | 0.77                     | 1.27                     | NR      | Fair              |
| hospitalized with COVID-19,<br>≤50 y                              | Klang E (USA; rc)               | 572                            | 1.1                        | 0.5                      | 2.3                      | 0.755   | Fair              |
| hospitalized with COVID-19,<br>>50 y                              | Klang E (USA; rc)               | 2,834                          | 1.1                        | 0.9                      | 1.3                      | 0.421   | Fair              |
| hospitalized with COVID-19                                        | Petrilli CM (USA; pc)           | 2,725                          | 1.08                       | 0.87                     | 1.36                     | 0.48    | Good              |
| hospitalized with COVID-19                                        | Palaiodimos L (USA; rc)         | 200                            | 3.78                       | 1.45                     | 9.83                     | 0.006   | Good              |
| <b>Mortality</b>                                                  |                                 |                                |                            |                          |                          |         |                   |
| hospitalized with COVID-19                                        | Petrilli CM (USA; pc)           | 2,725                          | 1.45                       | 0.99                     | 2.13                     | 0.05    | Good              |
| <b>Obese class III (BMI ≥40) vs. normal weight (BMI &lt;25)**</b> |                                 |                                |                            |                          |                          |         |                   |
| <b>Hospitalization</b>                                            |                                 |                                |                            |                          |                          |         |                   |
| positive for COVID-19                                             | Petrilli CM (USA; pc)           | 5,279                          | 2.45                       | 1.78                     | 3.36                     | <0.001  | Good              |
| <b>Severe disease</b>                                             |                                 |                                |                            |                          |                          |         |                   |
| hospitalized with COVID-19                                        | Petrilli CM (USA; pc)           | 2,725                          | 1.71                       | 1.1                      | 2.7                      | 0.02    | Good              |
| <b>Mechanical ventilation</b>                                     |                                 |                                |                            |                          |                          |         |                   |
| hospitalized with COVID-19                                        | Hur K (USA; rc)                 | 486                            | 1.92                       | 0.92                     | 4                        | 0.08    | Good              |
| <b>Mortality</b>                                                  |                                 |                                |                            |                          |                          |         |                   |
| hospitalized with COVID-19                                        | Petrilli CM (USA; pc)           | 2,725                          | 1.45                       | 0.99                     | 2.13                     | 0.05    | Good              |
| hospitalized with COVID-19,<br>≤50 y                              | Klang E (USA; rc)               | 572                            | 5.1                        | 2.3                      | 11.1                     | <0.001  | Fair              |
| hospitalized with COVID-19,<br>>50 y                              | Klang E (USA; rc)               | 2,834                          | 1.6                        | 1.2                      | 2.3                      | 0.004   | Fair              |

\* values are adjusted odds ratio, unless otherwise denoted

\*\* the reference category differs slightly across studies

aHR: adjusted hazards ratio; aRR: adjusted risk ratio; BMI: body mass index; CI: confidence interval; COVID-19: novel coronavirus disease 2019; ICU: intensive care unit; NR: not reported; pc: prospective cohort; rc: retrospective cohort; UK: United Kingdom; USA: United States of America; y: year(s)

Table 2. Pre-existing disease, unspecified

| Risk factor;<br>Outcome among<br>population                       | Study                           | Total<br>number of<br>patients | Adjusted<br>odds<br>ratio* | 95% CI<br>lower<br>bound | 95% CI<br>upper<br>bound | p-value | Quality<br>rating |
|-------------------------------------------------------------------|---------------------------------|--------------------------------|----------------------------|--------------------------|--------------------------|---------|-------------------|
| <b>CCI score</b>                                                  |                                 |                                |                            |                          |                          |         |                   |
| <b>Hospitalization</b>                                            |                                 |                                |                            |                          |                          |         |                   |
| positive for COVID-19                                             | Price-Haywood EG (USA; rc)      | 3,481                          | aHR 1.05                   | 1                        | 1.1                      | NR      | Good              |
| <b>Severe disease</b>                                             |                                 |                                |                            |                          |                          |         |                   |
| ICU transfer or death (composite) among hospitalized for COVID-19 | Piano S (Italy)                 | 565                            | 1.21                       | 1.03                     | 1.42                     | 0.021   | Good              |
| <b>Mortality</b>                                                  |                                 |                                |                            |                          |                          |         |                   |
| hospitalized with COVID-19                                        | Price-Haywood EG (USA; rc)      | 1,382                          | aHR 0.99                   | 0.95                     | 1.04                     | NR      | Good              |
| hospitalized with COVID-19                                        | Imam (USA; rc)                  | 1,305                          | 2.71                       | 1.85                     | 3.97                     | <0.001  | Fair              |
| <b>Number of comorbidities</b>                                    |                                 |                                |                            |                          |                          |         |                   |
| <b>Severe disease</b>                                             |                                 |                                |                            |                          |                          |         |                   |
| ICU or death (composite) among positive for COVID-19              | Hajifathalian K (USA; rc) #1154 | 1,059                          | 1.19                       | NR                       | NR                       | 0.021   | Fair              |

\* values are adjusted odds ratio, unless otherwise denoted

aHR: adjusted hazards ratio; CCI: Charlson Comorbidity Index; CI: confidence interval; COVID-19: novel coronavirus disease 2019; ICU: intensive care unit; NR: not reported; rc: retrospective cohort; USA: United States of America; y: year(s)

Table 3. Respiratory disease

| Risk factor;<br>Outcome among<br>population                                                                                                      | Study                   | Total<br>number of<br>patients | Adjusted<br>odds<br>ratio* | 95% CI<br>lower<br>bound | 95% CI<br>upper<br>bound | p-value          | Quality<br>rating |
|--------------------------------------------------------------------------------------------------------------------------------------------------|-------------------------|--------------------------------|----------------------------|--------------------------|--------------------------|------------------|-------------------|
| <b>Asthma</b>                                                                                                                                    |                         |                                |                            |                          |                          |                  |                   |
| <b>Hospitalization</b>                                                                                                                           |                         |                                |                            |                          |                          |                  |                   |
| positive for COVID-19                                                                                                                            | Azar K (USA; rc)        | 1,052                          | 1.52                       | 0.89                     | 2.58                     | >0.05            | Good              |
| <b>Asthma or COPD</b>                                                                                                                            |                         |                                |                            |                          |                          |                  |                   |
| <b>Hospitalization</b>                                                                                                                           |                         |                                |                            |                          |                          |                  |                   |
| positive for COVID-19                                                                                                                            | Petrilli CM (USA; pc)   | 5,279                          | 1.08                       | 0.88                     | 1.33                     | 0.47             | Good              |
| <b>Severe disease</b>                                                                                                                            |                         |                                |                            |                          |                          |                  |                   |
| hospitalized with COVID-19                                                                                                                       | Petrilli CM (USA; pc)   | 2,725                          | 0.99                       | 0.76                     | 1.3                      | 0.93             | Good              |
| <b>Mortality</b>                                                                                                                                 |                         |                                |                            |                          |                          |                  |                   |
| hospitalized with COVID-19                                                                                                                       | Petrilli CM (USA; pc)   | 2,725                          | 1.03                       | 0.83                     | 1.29                     | 0.76             | Good              |
| <b>Chronic pulmonary disease or COPD</b>                                                                                                         |                         |                                |                            |                          |                          |                  |                   |
| <b>Hospitalization</b>                                                                                                                           |                         |                                |                            |                          |                          |                  |                   |
| positive for COVID-19                                                                                                                            | Azar K (USA; rc)        | 1,052                          | 1.8                        | 0.75                     | 4.34                     | >0.05            | Good              |
| community sample                                                                                                                                 | Patel AP (UK; pc)       | 418,794                        | <b>1.51</b>                | <b>1</b>                 | <b>2.28</b>              | <b>0.05</b>      | Fair              |
| <b>Mortality</b>                                                                                                                                 |                         |                                |                            |                          |                          |                  |                   |
| hospitalized with COVID-19                                                                                                                       | Docherty AB (UK; pc)    | 20,133                         | <b>aHR 1.17</b>            | <b>1.09</b>              | <b>1.27</b>              | <b>&lt;0.001</b> | Good              |
| hospitalized with COVID-19                                                                                                                       | Palaiodimos L (USA; rc) | 200                            | 2.05                       | 0.76                     | 5.51                     | 0.156            | Good              |
| <b>Chronic bronchitis</b>                                                                                                                        |                         |                                |                            |                          |                          |                  |                   |
| <b>Hospitalization</b>                                                                                                                           |                         |                                |                            |                          |                          |                  |                   |
| community sample                                                                                                                                 | Lassale C (UK; pc)      | 340,966                        | 1.34                       | 0.81                     | 2.21                     | 0.259            | Fair              |
| <b>Obstructive sleep apnea</b>                                                                                                                   |                         |                                |                            |                          |                          |                  |                   |
| <b>Mechanical ventilation</b>                                                                                                                    |                         |                                |                            |                          |                          |                  |                   |
| hospitalized with COVID-19                                                                                                                       | Palaiodimos L (USA; rc) | 200                            | 1.15                       | 0.4                      | 3.35                     | 0.791            | Good              |
| <b>Pneumonia, previous</b>                                                                                                                       |                         |                                |                            |                          |                          |                  |                   |
| <b>Hospitalization</b>                                                                                                                           |                         |                                |                            |                          |                          |                  |                   |
| community sample                                                                                                                                 | Patel AP (UK; pc)       | 418,794                        | 1.31                       | 0.83                     | 2.05                     | 0.25             | Fair              |
| <b>Other respiratory disease (includes one or more of: asthma, COPD, lung disease, interstitial lung disease, and/or pulmonary hypertension)</b> |                         |                                |                            |                          |                          |                  |                   |
| <b>ICU admission</b>                                                                                                                             |                         |                                |                            |                          |                          |                  |                   |
| hospitalized with COVID-19<br>(includes heart failure,<br>coronary artery disease and<br>cardiomyopathy)                                         | Kalligeros M (USA; rc)  | 103                            | 1.5                        | 0.47                     | 4.82                     | 0.495            | Good              |
| <b>Mechanical ventilation</b>                                                                                                                    |                         |                                |                            |                          |                          |                  |                   |
| hospitalized with COVID-19<br>(includes heart failure,<br>coronary artery disease and<br>cardiomyopathy)                                         | Kalligeros M (USA; rc)  | 103                            | 0.76                       | 0.2                      | 2.86                     | 0.687            | Good              |
| <b>Mortality</b>                                                                                                                                 |                         |                                |                            |                          |                          |                  |                   |
| hospitalized with COVID-19<br>(chronic cardiac disease or<br>congestive heart failure)                                                           | Cummings MJ (USA; pc)   | 257                            | <b>aHR 2.94</b>            | <b>1.48</b>              | <b>5.84</b>              | <b>NR</b>        | Good              |



1  
2  
3  
4  
5  
6  
7  
8  
9  
10  
11  
12  
13  
14  
15  
16  
17  
18  
19  
20  
21  
22  
23  
24  
25  
26  
27  
28  
29  
30  
31  
32  
33  
34  
35  
36  
37  
38  
39  
40  
41  
42  
43  
44  
45  
46  
47  
48  
49  
50  
51  
52  
53  
54  
55  
56  
57  
58  
59  
60

\* values are adjusted odds ratio, unless otherwise denoted  
aHR: adjusted hazards ratio; CI: confidence interval; COPD=Chronic obstructive pulmonary disease; COVID-19: novel coronavirus disease 2019; ICU: intensive care unit; NR: not reported; pc: prospective cohort; rc: retrospective cohort; UK: United Kingdom; USA: United States of America

For peer review only

Table 4. Cardiovascular disease

| Risk factor;<br>Outcome among<br>population                              | Study                   | Total<br>number of<br>patients | Adjusted<br>odds<br>ratio* | 95%<br>CI<br>lower<br>bound | 95%<br>CI<br>upper<br>bound | p-value          | Quality<br>rating |
|--------------------------------------------------------------------------|-------------------------|--------------------------------|----------------------------|-----------------------------|-----------------------------|------------------|-------------------|
| <b>Cardiovascular disease</b>                                            |                         |                                |                            |                             |                             |                  |                   |
| <b>Hospitalization</b>                                                   |                         |                                |                            |                             |                             |                  |                   |
| community sample                                                         | Lassale C (UK; pc)      | 340,966                        | <b>1.06</b>                | <b>0.79</b>                 | <b>1.42</b>                 | <b>0.001</b>     | Fair              |
| positive for COVID-19                                                    | Azar K (USA; rc)        | 1,052                          | 1.32                       | 0.75                        | 2.32                        | >0.05            | Good              |
| <b>Heart failure</b>                                                     |                         |                                |                            |                             |                             |                  |                   |
| <b>Hospitalization</b>                                                   |                         |                                |                            |                             |                             |                  |                   |
| positive for COVID-19                                                    | Azar K (USA; rc)        | 1,052                          | <b>3.34</b>                | <b>1.49</b>                 | <b>7.52</b>                 | <b>&lt;0.001</b> | Good              |
| community sample                                                         | Patel AP (UK; pc)       | 418,794                        | 1.09                       | 0.56                        | 2.14                        | 0.79             | Fair              |
| positive for COVID-19                                                    | Petrilli CM (USA; pc)   | 5,279                          | <b>4.43</b>                | <b>2.59</b>                 | <b>8.04</b>                 | <b>&lt;0.001</b> | Good              |
| <b>Severe disease</b>                                                    |                         |                                |                            |                             |                             |                  |                   |
| hospitalized with COVID-19                                               | Petrilli CM (USA; pc)   | 2,725                          | <b>1.93</b>                | <b>1.4</b>                  | <b>2.6</b>                  | <b>&lt;0.001</b> | Good              |
| <b>Mortality</b>                                                         |                         |                                |                            |                             |                             |                  |                   |
| hospitalized with COVID-19                                               | Palaiodimos L (USA; rc) | 200                            | 1.43                       | 0.5                         | 4.06                        | 0.501            | Good              |
| hospitalized with COVID-19                                               | Petrilli CM (USA; pc)   | 2,725                          | <b>1.54</b>                | <b>1.23</b>                 | <b>1.93</b>                 | <b>&lt;0.001</b> | Good              |
| <b>Coronary artery disease (includes coronary heart disease)</b>         |                         |                                |                            |                             |                             |                  |                   |
| <b>Hospitalization</b>                                                   |                         |                                |                            |                             |                             |                  |                   |
| community sample                                                         | Patel AP (UK; pc)       | 418,794                        | 0.95                       | 0.67                        | 1.36                        | 0.79             | Fair              |
| positive for COVID-19                                                    | Petrilli CM (USA; pc)   | 5,279                          | 1.08                       | 0.81                        | 1.44                        | 0.6              | Good              |
| <b>Severe disease</b>                                                    |                         |                                |                            |                             |                             |                  |                   |
| hospitalized with COVID-19                                               | Petrilli CM (USA; pc)   | 2,725                          | 0.92                       | 0.71                        | 1.2                         | 0.56             | Good              |
| ICU transfer or death<br>(composite) among<br>hospitalized with COVID-19 | Cecconi M (Italy; rc)   | 239                            | <b>aHR 2.02</b>            | <b>1.13</b>                 | <b>3.64</b>                 | <b>0.018</b>     | Fair              |
| <b>Mortality</b>                                                         |                         |                                |                            |                             |                             |                  |                   |
| hospitalized with COVID-19                                               | Palaiodimos L (USA; rc) | 200                            | 1.53                       | 0.54                        | 4.34                        | 0.421            | Good              |
| hospitalized with COVID-19                                               | Petrilli CM (USA; pc)   | 2,725                          | 1.1                        | 0.9                         | 1.35                        | 0.36             | Good              |
| <b>Hyperlipidemia</b>                                                    |                         |                                |                            |                             |                             |                  |                   |
| <b>Hospitalization</b>                                                   |                         |                                |                            |                             |                             |                  |                   |
| positive for COVID-19                                                    | Petrilli CM (USA; pc)   | 5,279                          | <b>0.62</b>                | <b>0.52</b>                 | <b>0.74</b>                 | <b>&lt;0.001</b> | Good              |
| <b>Severe disease</b>                                                    |                         |                                |                            |                             |                             |                  |                   |
| hospitalized with COVID-19                                               | Petrilli CM (USA; pc)   | 2,725                          | 0.93                       | 0.75                        | 1.2                         | 0.51             | Good              |
| <b>Mechanical ventilation</b>                                            |                         |                                |                            |                             |                             |                  |                   |
| hospitalized with COVID-19                                               | Palaiodimos L (USA; rc) | 200                            | 1.66                       | 0.78                        | 3.55                        | 0.188            | Good              |
| <b>Mortality</b>                                                         |                         |                                |                            |                             |                             |                  |                   |
| hospitalized with COVID-19                                               | Petrilli CM (USA; pc)   | 2,725                          | 0.98                       | 0.82                        | 1.17                        | 0.79             | Good              |
| <b>Hypertension</b>                                                      |                         |                                |                            |                             |                             |                  |                   |
| <b>Hospitalization</b>                                                   |                         |                                |                            |                             |                             |                  |                   |
| community sample                                                         | Lassale C (UK; pc)      | 340,966                        | 0.98                       | 0.82                        | 1.17                        | 0.84             | Fair              |

| Risk factor;<br>Outcome among<br>population                                                                                                                      | Study                  | Total<br>number of<br>patients | Adjusted<br>odds<br>ratio* | 95%<br>CI<br>lower<br>bound | 95%<br>CI<br>upper<br>bound | p-value          | Quality<br>rating |
|------------------------------------------------------------------------------------------------------------------------------------------------------------------|------------------------|--------------------------------|----------------------------|-----------------------------|-----------------------------|------------------|-------------------|
| community sample                                                                                                                                                 | Patel AP (UK; pc)      | 418,794                        | 1.12                       | 0.9                         | 1.39                        | 0.32             | Fair              |
| positive for COVID-19                                                                                                                                            | Azar K (USA; rc)       | 1,052                          | 1.4                        | 0.93                        | 2.1                         | >0.05            | Good              |
| positive for COVID-19                                                                                                                                            | Petrilli CM (USA; pc)  | 5,279                          | <b>1.78</b>                | <b>1.49</b>                 | <b>2.12</b>                 | <b>&lt;0.001</b> | Good              |
| <b>Severe disease</b>                                                                                                                                            |                        |                                |                            |                             |                             |                  |                   |
| hospitalized with COVID-19                                                                                                                                       | Petrilli CM (USA; pc)  | 2,725                          | 0.96                       | 0.75                        | 1.2                         | 0.76             | Good              |
| <b>ICU admission</b>                                                                                                                                             |                        |                                |                            |                             |                             |                  |                   |
| hospitalized with COVID-19                                                                                                                                       | Kalligeros M (USA; rc) | 103                            | 0.79                       | 0.27                        | 2.28                        | 0.663            | Good              |
| <b>Mechanical ventilation</b>                                                                                                                                    |                        |                                |                            |                             |                             |                  |                   |
| hospitalized with COVID-19                                                                                                                                       | Kalligeros M (USA; rc) | 103                            | 0.47                       | 0.13                        | 1.66                        | 0.242            | Good              |
| <b>Mortality</b>                                                                                                                                                 |                        |                                |                            |                             |                             |                  |                   |
| hospitalized with COVID-19                                                                                                                                       | Cummings MJ (USA; pc)  | 257                            | aHR 1.58                   | 0.89                        | 2.81                        | NR               | Good              |
| hospitalized with COVID-19                                                                                                                                       | Petrilli CM (USA; pc)  | 2,725                          | 0.98                       | 0.78                        | 1.23                        | 0.86             | Good              |
| <b>Other cardiovascular disease (includes one or more of: chronic cardiac disease, heart disease, heart failure, coronary artery disease and cardiomyopathy)</b> |                        |                                |                            |                             |                             |                  |                   |
| <b>ICU admission</b>                                                                                                                                             |                        |                                |                            |                             |                             |                  |                   |
| hospitalized with COVID-19                                                                                                                                       | Kalligeros M (USA; rc) | 103                            | 1.52                       | 0.51                        | 4.51                        | 0.448            | Good              |
| <b>Mechanical ventilation</b>                                                                                                                                    |                        |                                |                            |                             |                             |                  |                   |
| hospitalized with COVID-19                                                                                                                                       | Kalligeros M (USA; rc) | 103                            | <b>3.41</b>                | <b>1.05</b>                 | <b>11.06</b>                | <b>0.041</b>     | Good              |
| <b>Mortality</b>                                                                                                                                                 |                        |                                |                            |                             |                             |                  |                   |
| hospitalized with COVID-19                                                                                                                                       | Cummings MJ (USA; pc)  | 257                            | <b>aHR 1.76</b>            | <b>1.08</b>                 | <b>2.86</b>                 | <b>NR</b>        | Good              |
| hospitalized with COVID-19                                                                                                                                       | Docherty AB (UK; pc)   | 20,133                         | <b>aHR 1.16</b>            | <b>1.08</b>                 | <b>1.24</b>                 | <b>&lt;0.001</b> | Good              |
| <b>Ischemic stroke</b>                                                                                                                                           |                        |                                |                            |                             |                             |                  |                   |
| <b>Hospitalization</b>                                                                                                                                           |                        |                                |                            |                             |                             |                  |                   |
| community sample                                                                                                                                                 | Patel AP (UK; pc)      | 418,794                        | 0.94                       | 0.39                        | 2.3                         | 0.90             | Fair              |

\* values are adjusted odds ratio, unless otherwise denoted

aHR: adjusted hazards ratio; CI: confidence interval; COVID-19: novel coronavirus disease 2019; ICU: intensive care unit; NR: not reported; pc: prospective cohort; rc: retrospective cohort; UK: United Kingdom; USA: United States of America

Table 5. Endocrine disease

| Risk factor;<br>Outcome among<br>population | Study                   | Total<br>number<br>of<br>patients | Adjusted<br>odds<br>ratio* | 95% CI<br>lower<br>bound | 95% CI<br>upper<br>bound | p-value | Quality<br>rating |
|---------------------------------------------|-------------------------|-----------------------------------|----------------------------|--------------------------|--------------------------|---------|-------------------|
| <b>Diabetes</b>                             |                         |                                   |                            |                          |                          |         |                   |
| <b>Hospitalization</b>                      |                         |                                   |                            |                          |                          |         |                   |
| community sample                            | Patel AP (UK; pc)       | 418,794                           | 1.52                       | 1.14                     | 2.03                     | 0.01    | Fair              |
| positive for COVID-19                       | Petrilli CM (USA; pc)   | 5,279                             | 2.24                       | 1.84                     | 2.73                     | <0.001  | Good              |
| positive for COVID-19                       | Azar K (USA; rc)        | 1,052                             | 2.17                       | 1.33                     | 3.53                     | <0.01   | Fair              |
| <b>Severe disease</b>                       |                         |                                   |                            |                          |                          |         |                   |
| hospitalized with COVID-19                  | Petrilli CM (USA; pc)   | 2,725                             | 1.23                       | 0.99                     | 1.5                      | 0.06    | Good              |
| <b>ICU admission</b>                        |                         |                                   |                            |                          |                          |         |                   |
| hospitalized with COVID-19                  | Kalligeros M (USA; rc)  | 103                               | 1.91                       | 0.71                     | 5.19                     | 0.202   | Good              |
| <b>Mechanical ventilation</b>               |                         |                                   |                            |                          |                          |         |                   |
| hospitalized with COVID-19                  | Hur K (USA; rc)         | 486                               | 1.64                       | 1.02                     | 2.66                     | 0.046   | Good              |
| hospitalized with COVID-19                  | Kalligeros M (USA; rc)  | 103                               | 2.13                       | 0.73                     | 6.22                     | 0.168   | Good              |
| hospitalized with COVID-19                  | Palaiodimos L (USA; rc) | 200                               | 1.26                       | 0.58                     | 2.73                     | 0.557   | Good              |
| <b>Mortality</b>                            |                         |                                   |                            |                          |                          |         |                   |
| hospitalized with COVID-19                  | Cummings MJ (USA; pc)   | 257                               | aHR 1.31                   | 0.81                     | 2.1                      | NR      | Good              |
| hospitalized with COVID-19                  | Docherty AB (UK; pc)    | 20,133                            | aHR 1.06                   | 0.99                     | 1.14                     | 0.087   | Good              |
| hospitalized with COVID-19                  | Palaiodimos L (USA; rc) | 200                               | 1.16                       | 0.55                     | 2.44                     | 0.698   | Good              |
| hospitalized with COVID-19                  | Petrilli CM (USA; pc)   | 2,725                             | 1.01                       | 0.85                     | 1.21                     | 0.87    | Good              |

\* values are adjusted odds ratio, unless otherwise denoted

aHR: adjusted hazards ratio; CI: confidence interval; COVID-19: novel coronavirus disease 2019; ICU: intensive care unit; NR: not reported; pc: prospective cohort; rc: retrospective cohort; UK: United Kingdom; USA: United States of America

**Table 6. Hepatic disease**

| Risk factor;<br>Outcome among<br>population                | Study                      | Total<br>number<br>of<br>patients | Adjusted<br>odds<br>ratio* | 95% CI<br>lower<br>bound | 95% CI<br>upper<br>bound | p-value          | Quality<br>rating |
|------------------------------------------------------------|----------------------------|-----------------------------------|----------------------------|--------------------------|--------------------------|------------------|-------------------|
| <b>Liver disease</b>                                       |                            |                                   |                            |                          |                          |                  |                   |
| <b>Hospitalization</b>                                     |                            |                                   |                            |                          |                          |                  |                   |
| positive for COVID-19                                      | Singh S (USA; rc)<br>#1201 | 464                               | <b>aRR 1.3</b>             | <b>1.1</b>               | <b>1.6</b>               | <b>0.006</b>     | Good              |
| <b>Mortality</b>                                           |                            |                                   |                            |                          |                          |                  |                   |
| hospitalized with COVID-19                                 | Docherty AB (UK; pc)       | 20,133                            | <b>aHR 1.51</b>            | <b>1.21</b>              | <b>1.88</b>              | <b>&lt;0.001</b> | Good              |
| positive for COVID-19                                      | Singh S (USA; rc)<br>#1201 | 464                               | <b>aRR 3.0</b>             | <b>1.5</b>               | <b>6.0</b>               | <b>0.001</b>     | Good              |
| positive for COVID-19<br>(liver disease with<br>cirrhosis) | Singh S (USA; rc)<br>#1201 | 464                               | <b>aRR 4.6</b>             | <b>2.6</b>               | <b>8.3</b>               | <b>&lt;0.001</b> | Good              |

\* values are adjusted odds ratio, unless otherwise denoted

aHR: adjusted hazards ratio; aRR: adjusted risk ratio; CI: confidence interval; COVID-19: novel coronavirus disease 2019; pc: prospective cohort; rc: retrospective cohort; UK: United Kingdom; USA: United States of America

Table 7. Renal disease

| Risk factor;<br>Outcome among<br>population | Study                   | Total<br>number<br>of<br>patients | Adjusted<br>odds<br>ratio* | 95% CI<br>lower<br>bound | 95% CI<br>upper<br>bound | p-value          | Quality<br>rating |
|---------------------------------------------|-------------------------|-----------------------------------|----------------------------|--------------------------|--------------------------|------------------|-------------------|
| <b>Chronic kidney disease</b>               |                         |                                   |                            |                          |                          |                  |                   |
| <b>Hospitalization</b>                      |                         |                                   |                            |                          |                          |                  |                   |
| community sample                            | Patel AP (UK; pc)       | 418,794                           | <b>2.01</b>                | <b>1.19</b>              | <b>3.41</b>              | <b>0.01</b>      | Fair              |
| positive for COVID-19                       | Petrilli CM (USA; pc)   | 5,279                             | <b>2.6</b>                 | <b>1.89</b>              | <b>3.61</b>              | <b>&lt;0.001</b> | Good              |
| <b>Severe disease</b>                       |                         |                                   |                            |                          |                          |                  |                   |
| hospitalized with COVID-19                  | Petrilli CM (USA; pc)   | 2,725                             | <b>0.73</b>                | <b>0.55</b>              | <b>1</b>                 | <b>0.04</b>      | Good              |
| hospitalized with COVID-19                  | Bhargava A (USA; rc)    | 197                               | <b>7.4</b>                 | <b>2.5</b>               | <b>22</b>                | <b>&lt;0.001</b> | Good              |
| <b>Mortality</b>                            |                         |                                   |                            |                          |                          |                  |                   |
| hospitalized with COVID-19                  | Docherty AB (UK; pc)    | 20,133                            | <b>aHR 1.28</b>            | <b>1.18</b>              | <b>1.39</b>              | <b>&lt;0.001</b> | Good              |
| hospitalized with COVID-19                  | Petrilli CM (USA; pc)   | 2,725                             | 0.92                       | 0.73                     | 1.16                     | 0.49             | Good              |
| hospitalized with COVID-19                  | Palaiodimos L (USA; rc) | 200                               | 1.15                       | 0.49                     | 2.68                     | 0.746            | Good              |

\* values are adjusted odds ratio, unless otherwise denoted

aHR: adjusted hazards ratio; CI: confidence interval; COVID-19: novel coronavirus disease 2019; pc: prospective cohort; rc: retrospective cohort; UK: United Kingdom; USA: United States of America

**Table 8. Gastrointestinal disease**

| Risk factor;<br>Outcome among<br>population | Study                     | Total<br>number<br>of<br>patients | Adjusted<br>odds<br>ratio* | 95% CI<br>lower<br>bound | 95% CI<br>upper<br>bound | p-value | Quality<br>rating |
|---------------------------------------------|---------------------------|-----------------------------------|----------------------------|--------------------------|--------------------------|---------|-------------------|
| <b>Irritable bowel disease</b>              |                           |                                   |                            |                          |                          |         |                   |
| <b>Hospitalization</b>                      |                           |                                   |                            |                          |                          |         |                   |
| positive for COVID-19                       | Singh S (USA; rc)<br>#121 | 464                               | aRR 1.10                   | 0.74                     | 1.4                      | 0.91    | Good              |
| <b>Severe disease</b>                       |                           |                                   |                            |                          |                          |         |                   |
| positive for COVID-19                       | Singh S (USA; rc)<br>#121 | 464                               | aRR 0.93                   | 0.68                     | 1.27                     | 0.66    | Good              |

\* values are adjusted odds ratio, unless otherwise denoted

aRR: adjusted risk ratio; CI: confidence interval; COVID-19: novel coronavirus disease 2019; rc: retrospective cohort;  
USA: United States of America

**Table 9. Neurological disease**

| Risk factor;<br>Outcome among<br>population                | Study                    | Total<br>number<br>of<br>patients | Adjusted<br>odds<br>ratio* | 95% CI<br>lower<br>bound | 95% CI<br>upper<br>bound | p-value          | Quality<br>rating |
|------------------------------------------------------------|--------------------------|-----------------------------------|----------------------------|--------------------------|--------------------------|------------------|-------------------|
| <b>Alzheimer's disease or dementia</b>                     |                          |                                   |                            |                          |                          |                  |                   |
| <b>Hospitalization</b>                                     |                          |                                   |                            |                          |                          |                  |                   |
| community sample                                           | Patel AP (UK; pc)        | 418,794                           | 5.08                       | 0.7                      | 36.68                    | 0.11             | Fair              |
| <b>Dementia</b>                                            |                          |                                   |                            |                          |                          |                  |                   |
| <b>Mortality</b>                                           |                          |                                   |                            |                          |                          |                  |                   |
| hospitalized with COVID-19                                 | Bianchetti A (Italy; rc) | 627                               | <b>1.84</b>                | <b>1.08</b>              | <b>3.13</b>              | <b>0.024</b>     | Fair              |
| hospitalized with COVID-19 (dementia)                      | Docherty AB (UK; pc)     | 20,133                            | <b>aHR 1.40</b>            | <b>1.28</b>              | <b>1.52</b>              | <b>&lt;0.001</b> | Good              |
| hospitalized with COVID-19                                 | Covino M (Italy; rc)     | 69                                | <b>aHR 3.87</b>            | <b>1.23</b>              | <b>12.17</b>             | <b>0.021</b>     | Fair              |
| hospitalized with COVID-19 (chronic neurological disorder) | Docherty AB (UK; pc)     | 20,133                            | <b>aHR 1.17</b>            | <b>1.06</b>              | <b>1.29</b>              | <b>0.001</b>     | Good              |

\* values are adjusted odds ratio, unless otherwise denoted

\*\* the reference category differs slightly across studies

aHR: adjusted hazards ratio; CI: confidence interval; COVID-19: novel coronavirus disease 2019; pc: prospective cohort; rc: retrospective cohort; UK: United Kingdom



Table 10. Malignancy

| Risk factor;<br>Outcome among<br>population | Study                  | Total<br>number<br>of<br>patients | Adjusted<br>odds<br>ratio* | 95% CI<br>lower<br>bound | 95% CI<br>upper<br>bound | p-value      | Quality<br>rating |
|---------------------------------------------|------------------------|-----------------------------------|----------------------------|--------------------------|--------------------------|--------------|-------------------|
| <b>Cancer or tumor</b>                      |                        |                                   |                            |                          |                          |              |                   |
| <b>Hospitalization</b>                      |                        |                                   |                            |                          |                          |              |                   |
| positive for COVID-19                       | Azar K (USA; rc)       | 1,052                             | 0.96                       | 0.45                     | 2.03                     | >0.05        | Good              |
| positive for COVID-19                       | Petrilli CM (USA; pc)  | 5,279                             | 0.88                       | 0.65                     | 1.19                     | 0.41         | Good              |
| <b>Severe disease</b>                       |                        |                                   |                            |                          |                          |              |                   |
| hospitalized with COVID-19                  | Petrilli CM (USA; pc)  | 2,725                             | 1.3                        | 0.95                     | 1.8                      | 0.1          | Good              |
| hospitalized with COVID-19                  | Colaneri M (Italy; rc) | 44                                | 22.199                     | 0.826                    | 596.15<br>2              | 0.0648       | Good              |
| <b>Mortality</b>                            |                        |                                   |                            |                          |                          |              |                   |
| hospitalized with COVID-19                  | Petrilli CM (USA; pc)  | 2,725                             | <b>1.29</b>                | <b>1.03</b>              | <b>1.62</b>              | <b>0.03</b>  | Good              |
| hospitalized with COVID-19                  | Docherty AB (UK; pc)   | 20,133                            | <b>aHR 1.13</b>            | <b>1.02</b>              | <b>1.24</b>              | <b>0.017</b> | Good              |
| positive for COVID-19                       | Shah V (UK; rc)        | 1,183                             | <b>aHR 1.74</b>            | <b>1.12</b>              | <b>2.71</b>              | <b>0.014</b> | Fair              |
| <b>Hematological cancer - lymphoid</b>      |                        |                                   |                            |                          |                          |              |                   |
| <b>Mortality</b>                            |                        |                                   |                            |                          |                          |              |                   |
| positive for COVID-19                       | Shah V (UK; rc)        | 1,183                             | <b>aHR 1.75</b>            | <b>1.07</b>              | <b>2.87</b>              | <b>0.026</b> | Fair              |
| <b>Hematological cancer - myeloid</b>       |                        |                                   |                            |                          |                          |              |                   |
| <b>Mortality</b>                            |                        |                                   |                            |                          |                          |              |                   |
| positive for COVID-19                       | Shah V (UK; rc)        | 1,183                             | aHR 1.70                   | 0.7                      | 4.13                     | 0.244        | Fair              |

\* values are adjusted odds ratio, unless otherwise denoted

aHR: adjusted hazards ratio; CI: confidence interval; COVID-19: novel coronavirus disease 2019; pc: prospective cohort; rc: retrospective cohort; UK: United Kingdom; USA: United States of America

Table 11. Immunocompromised

| Risk factor;<br>Outcome among<br>population                          | Study                  | Total<br>number<br>of<br>patients | Adjusted<br>odds<br>ratio* | 95% CI<br>lower<br>bound | 95% CI<br>upper<br>bound | p-value      | Quality<br>rating |
|----------------------------------------------------------------------|------------------------|-----------------------------------|----------------------------|--------------------------|--------------------------|--------------|-------------------|
| <b>Rheumatic disease</b>                                             |                        |                                   |                            |                          |                          |              |                   |
| <b>Hospitalization</b>                                               |                        |                                   |                            |                          |                          |              |                   |
| positive for COVID-19                                                | D'Silva K (USA;<br>pc) | 156                               | 1.1                        | 0.51                     | 2.38                     | 0.81         | Fair              |
| <b>ICU admission</b>                                                 |                        |                                   |                            |                          |                          |              |                   |
| ICU or mechanical<br>ventilation among<br>hospitalized with COVID-19 | D'Silva K (USA;<br>pc) | 65                                | <b>2.92</b>                | <b>1.002</b>             | <b>8.49</b>              | <b>0.049</b> | Fair              |
| <b>Mortality</b>                                                     |                        |                                   |                            |                          |                          |              |                   |
| positive for COVID-19                                                | D'Silva K (USA;<br>pc) | 156                               | 1.58                       | 0.31                     | 8.03                     | 0.58         | Fair              |
| <b>HIV</b>                                                           |                        |                                   |                            |                          |                          |              |                   |
| <b>Mortality</b>                                                     |                        |                                   |                            |                          |                          |              |                   |
| hospitalized with COVID-19                                           | Okoh A (USA; rc)       | 251                               | <b>0.07</b>                | <b>0.03</b>              | <b>0.52</b>              | <b>0.006</b> | Good              |

\* values are adjusted odds ratio, unless otherwise denoted

CI: confidence interval; COVID-19: novel coronavirus disease 2019; HIV: human immunodeficiency virus; ICU: intensive care unit; pc: prospective cohort; rc: retrospective cohort; USA: United States of America

Table 12. Mental health

| Risk factor;<br>Outcome among<br>population | Study                 | Total<br>number<br>of<br>patients | Adjusted<br>odds<br>ratio* | 95% CI<br>lower<br>bound | 95% CI<br>upper<br>bound | p-value | Quality<br>rating |
|---------------------------------------------|-----------------------|-----------------------------------|----------------------------|--------------------------|--------------------------|---------|-------------------|
| <b>Depression</b>                           |                       |                                   |                            |                          |                          |         |                   |
| <b>Hospitalization</b>                      |                       |                                   |                            |                          |                          |         |                   |
| positive for COVID-19                       | Azar K (USA; rc)      | 1,052                             | 1.18                       | 0.57                     | 2.41                     | >0.05   | Good              |
| <b>Ever seen a psychiatrist</b>             |                       |                                   |                            |                          |                          |         |                   |
| <b>Hospitalization</b>                      |                       |                                   |                            |                          |                          |         |                   |
| community sample                            | Lassale C (UK;<br>pc) | 340,966                           | 1.24                       | 0.99                     | 1.55                     | 0.057   | Fair              |

\* values are adjusted odds ratio, unless otherwise denoted

\*\* the reference category differs slightly across studies

CI: confidence interval; COVID-19: novel coronavirus disease 2019; pc: prospective cohort; rc: retrospective cohort;

UK: United Kingdom; USA: United States of America

Table 13. Place/state of residence

| Risk factor;<br>Outcome among<br>population    | Study                      | Total<br>number of<br>patients | Adjusted<br>odds<br>ratio* | 95% CI<br>lower<br>bound | 95% CI<br>upper<br>bound | p-value | Quality<br>rating |
|------------------------------------------------|----------------------------|--------------------------------|----------------------------|--------------------------|--------------------------|---------|-------------------|
| <b>Low-income geographic area</b>              |                            |                                |                            |                          |                          |         |                   |
| <b>Hospitalization</b>                         |                            |                                |                            |                          |                          |         |                   |
| positive for COVID-19                          | Price-Haywood EG (USA; rc) | 3,481                          | 1.22                       | 1.04                     | 1.43                     | NR      | Good              |
| <b>Homeless</b>                                |                            |                                |                            |                          |                          |         |                   |
| <b>Hospitalization</b>                         |                            |                                |                            |                          |                          |         |                   |
| positive for COVID-19                          | Azar K (USA; rc)           | 1,052                          | 3.25                       | 0.38                     | 28.02                    | >0.05   | Good              |
| <b>Number of people in household (1 vs. 2)</b> |                            |                                |                            |                          |                          |         |                   |
| <b>Hospitalization</b>                         |                            |                                |                            |                          |                          |         |                   |
| community sample                               | Lassale C (UK; pc)         | 340,966                        | 1.15                       | 0.93                     | 1.43                     | 0.195   | Fair              |
| <b>Number of people in household (3 vs. 2)</b> |                            |                                |                            |                          |                          |         |                   |
| <b>Hospitalization</b>                         |                            |                                |                            |                          |                          |         |                   |
| community sample                               | Lassale C (UK; pc)         | 340,966                        | 1.22                       | 0.97                     | 1.55                     | 0.093   | Fair              |
| <b>Number of people in household (4 vs. 2)</b> |                            |                                |                            |                          |                          |         |                   |
| <b>Hospitalization</b>                         |                            |                                |                            |                          |                          |         |                   |
| community sample                               | Lassale C (UK; pc)         | 340,966                        | 1.59                       | 1.26                     | 2.01                     | <0.001  | Fair              |
| <b>Suburban vs. urban hospital</b>             |                            |                                |                            |                          |                          |         |                   |
| <b>Mechanical ventilation</b>                  |                            |                                |                            |                          |                          |         |                   |
| hospitalized with COVID-19                     | Hur K (USA; rc)            | 486                            | 1.35                       | 0.82                     | 2.23                     | 0.241   | Good              |

\* values are adjusted odds ratio, unless otherwise denoted

CI: confidence interval; COVID-19: novel coronavirus disease 2019; pc: prospective cohort; rc: retrospective cohort;

UK: United Kingdom; USA: United States of America; vs.: versus

Table 14. Race/ethnicity

| Risk factor;<br>Outcome among<br>population    | Study                          | Total<br>number<br>of<br>patients | Adjusted<br>odds<br>ratio* | 95% CI<br>lower<br>bound | 95% CI<br>upper<br>bound | p-value          | Quality<br>rating |
|------------------------------------------------|--------------------------------|-----------------------------------|----------------------------|--------------------------|--------------------------|------------------|-------------------|
| <b>Black vs. non-Hispanic White</b>            |                                |                                   |                            |                          |                          |                  |                   |
| <b>Hospitalization</b>                         |                                |                                   |                            |                          |                          |                  |                   |
| community sample                               | Lassale C (UK; pc)             | 340,966                           | <b>2.66</b>                | <b>1.82</b>              | <b>3.91</b>              | <b>&lt;0.001</b> | Fair              |
| community sample                               | Patel AP (UK; pc)              | 418,794                           | <b>2.38</b>                | <b>1.52</b>              | <b>3.74</b>              | <b>&lt;0.001</b> | Fair              |
| positive for COVID-19                          | Azar K (USA; rc)               | 1,052                             | <b>2.67</b>                | <b>1.3</b>               | <b>5.47</b>              | <b>&lt;0.01</b>  | Good              |
| positive for COVID-19                          | Petrilli CM (USA; pc)          | 5,279                             | 0.81                       | 0.65                     | 1.01                     | 0.06             | Good              |
| positive for COVID-19                          | Price-Haywood EG (USA; rc)     | 3,481                             | <b>1.96</b>                | <b>1.62</b>              | <b>2.37</b>              | <b>NR</b>        | Good              |
| <b>Severe disease</b>                          |                                |                                   |                            |                          |                          |                  |                   |
| hospitalized with COVID-19                     | Gold JAW (USA; pc)             | 305                               | aHR 0.63                   | 0.35                     | 1.13                     | >0.05            | Good              |
| hospitalized with COVID-19                     | Petrilli CM (USA; pc)          | 2,725                             | <b>0.57</b>                | <b>0.41</b>              | <b>0.8</b>               | <b>0.001</b>     | Good              |
| <b>ICU admission</b>                           |                                |                                   |                            |                          |                          |                  |                   |
| hospitalized with COVID-19                     | Hajifathalian (USA; rc) #163   | 770                               | aRR 1.16                   | 0.7                      | 1.94                     | 0.558            | Fair              |
| hospitalized with COVID-19                     | Kalligeros M (USA; rc)         | 103                               | 0.8                        | 0.26                     | 2.45                     | 0.701            | Good              |
| <b>Mechanical Ventilation</b>                  |                                |                                   |                            |                          |                          |                  |                   |
| hospitalized with COVID-19                     | Kalligeros M (USA; rc)         | 103                               | 1.83                       | 0.55                     | 6.11                     | 0.327            | Good              |
| hospitalized with COVID-19                     | Hajifathalian (USA; rc) #163   | 770                               | aRR 1.23                   | 0.74                     | 2.06                     | 0.42             | Fair              |
| hospitalized with COVID-19                     | Hur K (USA; rc)                | 486                               | 0.56                       | 0.3                      | 1.01                     | 0.058            | Good              |
| <b>Mortality</b>                               |                                |                                   |                            |                          |                          |                  |                   |
| hospitalized with COVID-19                     | Hajifathalian (USA; rc) #163   | 770                               | aRR 1.49                   | 0.67                     | 3.29                     | 0.328            | Fair              |
| hospitalized with COVID-19                     | Perez-Guzman FN (UK; rc)       | 520                               | <b>1.86</b>                | <b>1.03</b>              | <b>3.35</b>              | <b>NR</b>        | Good              |
| hospitalized with COVID-19                     | Petrilli CM (USA; pc)          | 2,725                             | <b>0.71</b>                | <b>0.53</b>              | <b>0.94</b>              | <b>0.02</b>      | Good              |
| hospitalized with COVID-19                     | Price-Haywood EG (USA; rc)     | 1,382                             | aHR 0.89                   | 0.68                     | 1.17                     | NR               | Good              |
| hospitalized with COVID-19 (Black-African)**   | Public Health England (UK; rc) | 130,091                           | aHR 1.06                   | 0.96                     | 1.18                     | 0.24             | Fair              |
| hospitalized with COVID-19 (Black-Caribbean)** | Public Health England (UK; rc) | 130,091                           | <b>aHR 1.10</b>            | <b>1.02</b>              | <b>1.19</b>              | <b>0.01</b>      | Fair              |
| hospitalized with COVID-19 (Black-Other)**     | Public Health England (UK; rc) | 130,091                           | <b>aHR 1.35</b>            | <b>1.18</b>              | <b>1.55</b>              | <b>&lt;0.001</b> | Fair              |
| <b>Hispanic vs. Non-Hispanic White</b>         |                                |                                   |                            |                          |                          |                  |                   |
| <b>Hospitalization</b>                         |                                |                                   |                            |                          |                          |                  |                   |
| positive for COVID-19                          | Azar K (USA; rc)               | 1,052                             | 1.24                       | 0.78                     | 1.98                     | >0.05            | Good              |
| positive for COVID-19                          | Petrilli CM (USA; pc)          | 5,279                             | <b>1.63</b>                | <b>1.35</b>              | <b>1.97</b>              | <b>&lt;0.001</b> | Good              |
| <b>Severe disease</b>                          |                                |                                   |                            |                          |                          |                  |                   |
| hospitalized with COVID-19                     | Petrilli CM (USA; pc)          | 2,725                             | 0.89                       | 0.69                     | 1.2                      | 0.38             | Good              |
| <b>ICU admission</b>                           |                                |                                   |                            |                          |                          |                  |                   |
| hospitalized with COVID-19                     | Kalligeros M (USA; rc)         | 103                               | 0.56                       | 0.19                     | 1.58                     | 0.271            | Good              |
| <b>Mechanical ventilation</b>                  |                                |                                   |                            |                          |                          |                  |                   |
| hospitalized with COVID-19                     | Hur K (USA; rc)                | 486                               | 0.83                       | 0.44                     | 1.55                     | 0.565            | Good              |

| Risk factor;<br>Outcome among<br>population         | Study                             | Total<br>number<br>of<br>patients | Adjusted<br>odds<br>ratio* | 95% CI<br>lower<br>bound | 95% CI<br>upper<br>bound | p-value          | Quality<br>rating |
|-----------------------------------------------------|-----------------------------------|-----------------------------------|----------------------------|--------------------------|--------------------------|------------------|-------------------|
| hospitalized with COVID-19                          | Kalligeros M (USA; rc)            | 103                               | 1.17                       | 0.36                     | 3.82                     | 0.796            | Good              |
| <b>Asian vs. non-Hispanic White</b>                 |                                   |                                   |                            |                          |                          |                  |                   |
| <b>Hospitalization</b>                              |                                   |                                   |                            |                          |                          |                  |                   |
| community sample                                    | Lassale C (UK; pc)                | 340,966                           | 1.43                       | 0.91                     | 2.26                     | 0.125            | Fair              |
| community sample                                    | Patel AP (UK; pc)                 | 418,794                           | <b>1.75</b>                | <b>1.08</b>              | <b>2.85</b>              | <b>0.02</b>      | Fair              |
| positive for COVID-19                               | Petrilli CM (USA; pc)             | 5,279                             | 1.29                       | 0.97                     | 1.72                     | 0.08             | Good              |
| <b>Severe disease</b>                               |                                   |                                   |                            |                          |                          |                  |                   |
| hospitalized with COVID-19                          | Petrilli CM (USA; pc)             | 2,725                             | 1.24                       | 0.82                     | 1.9                      | 0.3              | Good              |
| <b>ICU admission</b>                                |                                   |                                   |                            |                          |                          |                  |                   |
| hospitalized with COVID-19                          | Hajifathalian (USA; rc)#163       | 770                               | <b>aRR 1.65</b>            | <b>1.05</b>              | <b>2.6</b>               | <b>0.031</b>     | Fair              |
| <b>Mechanical ventilation</b>                       |                                   |                                   |                            |                          |                          |                  |                   |
| hospitalized with COVID-19                          | Hajifathalian (USA; rc)#163       | 770                               | <b>aRR 1.68</b>            | <b>1.06</b>              | <b>2.66</b>              | <b>0.027</b>     | Fair              |
| <b>Mortality</b>                                    |                                   |                                   |                            |                          |                          |                  |                   |
| hospitalized with COVID-19                          | Hajifathalian (USA; rc)#163       | 770                               | aRR 1.47                   | 0.85                     | 2.55                     | 0.168            | Fair              |
| hospitalized with COVID-19                          | Perez-Guzman PN (UK; rc)          | 520                               | 1.74                       | 0.9                      | 3.36                     | NR               | Good              |
| hospitalized with COVID-19                          | Petrilli CM (USA; pc)             | 2,725                             | 1.26                       | 0.91                     | 1.75                     | 0.16             | Good              |
| hospitalized with COVID-19<br>(Asian-Bangladeshi)** | Public Health England (UK;<br>rc) | 130,091                           | <b>aHR 2.02</b>            | <b>1.74</b>              | <b>2.35</b>              | <b>&lt;0.001</b> | Fair              |
| hospitalized with COVID-19<br>(Asian-Chinese)**     | Public Health England (UK;<br>rc) | 130,091                           | <b>aHR 1.23</b>            | <b>1.04</b>              | <b>1.58</b>              | <b>0.02</b>      | Fair              |
| hospitalized with COVID-19<br>(Asian-Indian)**      | Public Health England (UK;<br>rc) | 130,091                           | <b>aHR 1.22</b>            | <b>1.13</b>              | <b>1.32</b>              | <b>&lt;0.001</b> | Fair              |
| hospitalized with COVID-19<br>(Asian-Other)**       | Public Health England (UK;<br>rc) | 130,091                           | <b>aHR 1.13</b>            | <b>1.02</b>              | <b>1.25</b>              | <b>0.02</b>      | Fair              |
| hospitalized with COVID-19<br>(Asian-Pakistani)**   | Public Health England (UK;<br>rc) | 130,091                           | <b>aHR 1.44</b>            | <b>1.31</b>              | <b>1.58</b>              | <b>&lt;0.001</b> | Fair              |

\* values are adjusted odds ratio, unless otherwise denoted

\*\*Findings were similar for ethnicity analyses stratified by age category, thus only results for the full sample are shown

aHR: adjusted hazards ratio; aRR: adjusted risk ratio; CI: confidence interval; COVID-19: novel coronavirus disease 2019; ICU: intensive care unit; NR: not reported; pc: prospective cohort; rc: retrospective cohort; UK: United Kingdom; USA: United States of America; vs.: versus

Table 15. Occupation

| Risk factor;<br>Outcome among<br>population                                           | Study                               | Total<br>number of<br>patients | Adjusted<br>odds<br>ratio* | 95% CI<br>lower<br>bound | 95% CI<br>upper<br>bound | p-value | Quality<br>rating |
|---------------------------------------------------------------------------------------|-------------------------------------|--------------------------------|----------------------------|--------------------------|--------------------------|---------|-------------------|
| <b>Healthcare workers: laryngologist/intubator vs. assistant</b>                      |                                     |                                |                            |                          |                          |         |                   |
| <b>Hospitalization</b>                                                                |                                     |                                |                            |                          |                          |         |                   |
| healthcare workers<br>performing tracheal<br>intubations on patients with<br>COVID-19 | El-Boghdady (Multi-<br>country; pc) | 1,718                          | aHR 0.76                   | 0.56                     | 1.04                     | 0.08    | Good              |

\* values are adjusted odds ratio, unless otherwise denoted

aHR: adjusted hazards ratio; CI: confidence interval; COVID-19: novel coronavirus disease 2019; pc: prospective cohort; vs.: versus

Table 16. Gender identity/sex

| Risk factor;<br>Outcome among<br>population                                  | Study                           | Total<br>number<br>of<br>patients | Adjusted<br>odds<br>ratio* | 95% CI<br>lower<br>bound | 95% CI<br>upper<br>bound | p-value          | Quality<br>rating |
|------------------------------------------------------------------------------|---------------------------------|-----------------------------------|----------------------------|--------------------------|--------------------------|------------------|-------------------|
| <b>Male vs. female</b>                                                       |                                 |                                   |                            |                          |                          |                  |                   |
| <b>Hospitalization</b>                                                       |                                 |                                   |                            |                          |                          |                  |                   |
| community sample                                                             | Patel AP (UK; pc)               | 418,794                           | <b>1.37</b>                | <b>1.12</b>              | <b>1.66</b>              | <b>0.00</b>      | Fair              |
| community sample                                                             | Lassale C (UK; pc)              | 340,966                           | 1.15                       | 0.92                     | 1.44                     | 0.219            | Fair              |
| positive for COVID-19                                                        | Azar K (USA; rc)                | 1052                              | <b>1.94</b>                | <b>1.33</b>              | <b>2.81</b>              | <b>&lt;0.01</b>  | Good              |
| positive for COVID-19                                                        | Petrilli CM (USA; pc)           | 5,279                             | <b>2.67</b>                | <b>2.39</b>              | <b>3.2</b>               | <b>&lt;0.001</b> | Good              |
| positive for COVID-19                                                        | Price-Haywood EG (USA; rc)      | 3,481                             | <b>1.79</b>                | <b>1.54</b>              | <b>2.08</b>              | NR               | Good              |
| healthcare workers performing tracheal intubations on patients with COVID-19 | El-Boghdady (Multi-country; pc) | 1,718                             | <b>aHR 0.74</b>            | <b>0.55</b>              | <b>0.99</b>              | <b>0.04</b>      | Good              |
| <b>Severe disease</b>                                                        |                                 |                                   |                            |                          |                          |                  |                   |
| hospitalized with COVID-19                                                   | Colaneri M (Italy; rc)          | 44                                | 17.24                      | 0.50                     | 1000.00                  | 0.1148           | Good              |
| hospitalized with COVID-19                                                   | Petrilli CM (USA; pc)           | 2,725                             | 1.06                       | 0.85                     | 1.3                      | 0.6              | Good              |
| death or transfer to the ICU (composite) among hospitalized for COVID-19     | Piano S (Italy; rc)             | 565                               | 1.42                       | 0.8                      | 2.52                     | 0.236            | Good              |
| <b>ICU admission</b>                                                         |                                 |                                   |                            |                          |                          |                  |                   |
| hospitalized with COVID-19                                                   | Busetto L (Italy; rc)           | 92                                | 0.54                       | 0.19                     | 1.52                     | 0.24             | Fair              |
| hospitalized with COVID-19                                                   | Kalligeros M (USA; rc)          | 103                               | 2.4                        | 0.87                     | 6.64                     | 0.09             | Good              |
| <b>Mechanical ventilation</b>                                                |                                 |                                   |                            |                          |                          |                  |                   |
| hospitalized with COVID-19                                                   | Busetto L (Italy; rc)           | 92                                | 1.22                       | 0.47                     | 3.17                     | 0.682            | Fair              |
| hospitalized with COVID-19                                                   | Hur K (USA; rc)                 | 486                               | <b>1.69</b>                | <b>1.04</b>              | <b>2.77</b>              | <b>0.034</b>     | Good              |
| hospitalized with COVID-19                                                   | Kalligeros M (USA; rc)          | 103                               | 1.13                       | 0.32                     | 3.4                      | 0.825            | Good              |
| hospitalized with COVID-19                                                   | Palaiodimos L (USA; rc)         | 200                               | <b>3.35</b>                | <b>1.51</b>              | <b>7.46</b>              | <b>0.003</b>     | Good              |
| <b>Mortality</b>                                                             |                                 |                                   |                            |                          |                          |                  |                   |
| hospitalized with COVID-19                                                   | Bianchetti A (Italy; rc)        | 627                               | 1.15                       | 0.79                     | 1.67                     | >0.05            | Fair              |
| hospitalized with COVID-19                                                   | Borobia A (Spain; rc)           | 2,226                             | <b>1.82</b>                | <b>1.27</b>              | <b>2.63</b>              | <b>0.002</b>     | Fair              |
| hospitalized with COVID-19                                                   | Busetto L (Italy; rc)           | 92                                | 2.51                       | 0.37                     | 16.94                    | 0.346            | Fair              |
| hospitalized with COVID-19                                                   | Cummings MJ (USA; pc)           | 257                               | aHR 1.13                   | 0.71                     | 1.81                     | NR               | Good              |
| hospitalized with COVID-19                                                   | Giacomelli A (Italy; pc)        | 233                               | aHR 1.42                   | 0.62                     | 3.28                     | 0.409            | Good              |
| hospitalized with COVID-19                                                   | Palaiodimos L (USA; rc)         | 200                               | <b>2.74</b>                | <b>1.25</b>              | <b>5.98</b>              | <b>0.011</b>     | Good              |
| hospitalized with COVID-19                                                   | Petrilli CM (USA; pc)           | 2,725                             | 0.92                       | 0.77                     | 1.11                     | 0.39             | Good              |
| hospitalized with COVID-19                                                   | Docherty AB (UK; pc)            | 20,133                            | <b>aHR 1.23</b>            | <b>1.16</b>              | <b>1.33</b>              | <b>&lt;0.001</b> | Good              |
| hospitalized with COVID-19                                                   | Price-Haywood EG (USA; rc)      | 1,382                             | aHR 1.14                   | 0.88                     | 1.47                     | NR               | Good              |
| hospitalized with COVID-19 (20-64 years)                                     | Public Health England (UK; rc)  | 64,961                            | aHR 1.99                   | 1.85                     | 2.14                     | <0.001           | Fair              |
| hospitalized with COVID-19 (>64 years)                                       | Public Health England (UK; rc)  | 63,094                            | aHR 1.47                   | 1.44                     | 1.51                     | <0.001           | Fair              |

\* values are adjusted odds ratio, unless otherwise denoted



1  
2  
3  
4  
5  
6  
7  
8  
9  
10  
11  
12  
13  
14  
15  
16  
17  
18  
19  
20  
21  
22  
23  
24  
25  
26  
27  
28  
29  
30  
31  
32  
33  
34  
35  
36  
37  
38  
39  
40  
41  
42  
43  
44  
45  
46  
47  
48  
49  
50  
51  
52  
53  
54  
55  
56  
57  
58  
59  
60

\*\* the reference category differs slightly across studies  
aHR: adjusted hazards ratio; CI: confidence interval; COVID-19: novel coronavirus disease 2019; ICU: intensive care unit; NR: not reported; pc: prospective cohort; rc: retrospective cohort; UK: United Kingdom; USA: United States of America; vs.: versus

For peer review only

Table 17. Education/literacy level

| Risk factor;<br>Outcome among<br>population  | Study              | Total<br>number of<br>patients | Adjusted<br>odds<br>ratio* | 95% CI<br>lower<br>bound | 95% CI<br>upper<br>bound | p-value | Quality<br>rating |
|----------------------------------------------|--------------------|--------------------------------|----------------------------|--------------------------|--------------------------|---------|-------------------|
| <b>Lower education vs. university degree</b> |                    |                                |                            |                          |                          |         |                   |
| <b>Hospitalization</b>                       |                    |                                |                            |                          |                          |         |                   |
| community sample                             | Lassale C (UK; pc) | 340,966                        | 1.15                       | 0.96                     | 1.37                     | 0.131   | Fair              |

\* values are adjusted odds ratio, unless otherwise denoted

CI: confidence interval; pc: prospective cohort; UK: United Kingdom

For peer review only

Table 18. Socioeconomic status

| Risk factor;<br>Outcome among<br>population                | Study                          | Total<br>number<br>of<br>patients | Adjusted<br>odds<br>ratio* | 95% CI<br>lower<br>bound | 95% CI<br>upper<br>bound | p-value          | Quality<br>rating |
|------------------------------------------------------------|--------------------------------|-----------------------------------|----------------------------|--------------------------|--------------------------|------------------|-------------------|
| <b>Material deprivation (Q2 vs. Q1 least deprived)</b>     |                                |                                   |                            |                          |                          |                  |                   |
| <b>Hospitalization (Townsend Index**)</b>                  |                                |                                   |                            |                          |                          |                  |                   |
| community sample                                           | Lassale C (UK; pc)             | 340,966                           | 1                          | 0.76                     | 1.33                     | 0.989            | Fair              |
| <b>Mortality (Index of Multiple Deprivation***)</b>        |                                |                                   |                            |                          |                          |                  |                   |
| Hospitalized                                               | Public Health England (UK; rc) | 130,091                           | <b>aHR 1.93</b>            | <b>1.70</b>              | <b>2.19</b>              | <b>&lt;0.001</b> | Fair              |
| <b>Town Material deprivation (Q3 vs. Q1)</b>               |                                |                                   |                            |                          |                          |                  |                   |
| <b>Hospitalization (Townsend Index)</b>                    |                                |                                   |                            |                          |                          |                  |                   |
| community sample                                           | Lassale C (UK; pc)             | 340,966                           | 0.99                       | 0.75                     | 1.31                     | 0.937            | Fair              |
| <b>Mortality (Index of Multiple Deprivation)</b>           |                                |                                   |                            |                          |                          |                  |                   |
| Hospitalized                                               | Public Health England (UK; rc) | 130,091                           | <b>aHR 1.65</b>            | <b>1.46</b>              | <b>1.88</b>              | <b>&lt;0.001</b> | Fair              |
| <b>Material deprivation (Q4 vs. Q1)</b>                    |                                |                                   |                            |                          |                          |                  |                   |
| <b>Hospitalization (Townsend Index)</b>                    |                                |                                   |                            |                          |                          |                  |                   |
| community sample                                           | Lassale C (UK; pc)             | 340,966                           | 1.24                       | 0.95                     | 1.62                     | 0.116            | Fair              |
| <b>Mortality (Index of Multiple Deprivation)</b>           |                                |                                   |                            |                          |                          |                  |                   |
| Hospitalized                                               | Public Health England (UK; rc) | 130,091                           | <b>aHR 1.38</b>            | <b>1.21</b>              | <b>1.57</b>              | <b>&lt;0.001</b> | Fair              |
| <b>Material deprivation (Q5 vs. Q1)</b>                    |                                |                                   |                            |                          |                          |                  |                   |
| <b>Hospitalization (Townsend Index)</b>                    |                                |                                   |                            |                          |                          |                  |                   |
| community sample                                           | Lassale C (UK; pc)             | 340,966                           | <b>1.67</b>                | <b>1.3</b>               | <b>2.16</b>              | <b>&lt;0.001</b> | Fair              |
| <b>Mortality (Index of Multiple Deprivation)</b>           |                                |                                   |                            |                          |                          |                  |                   |
| Hospitalized                                               | Public Health England (UK; rc) | 130,091                           | <b>aHR 1.32</b>            | <b>1.15</b>              | <b>1.52</b>              | <b>&lt;0.001</b> | Fair              |
| <b>Townsend index (continuous)</b>                         |                                |                                   |                            |                          |                          |                  |                   |
| <b>Hospitalization</b>                                     |                                |                                   |                            |                          |                          |                  |                   |
| community sample                                           | Patel AP (UK; pc)              | 418,794                           | <b>1.09</b>                | <b>1.05</b>              | <b>1.12</b>              | <b>&lt;0.001</b> | Fair              |
| <b>Average income (continuous)</b>                         |                                |                                   |                            |                          |                          |                  |                   |
| <b>Hospitalization</b>                                     |                                |                                   |                            |                          |                          |                  |                   |
| community sample                                           | Patel AP (UK; pc)              | 418,794                           | 1.01                       | 0.92                     | 1.11                     | 0.76             | Fair              |
| <b>Income percentile (26th to 50th vs. 25th and below)</b> |                                |                                   |                            |                          |                          |                  |                   |
| <b>Hospitalization</b>                                     |                                |                                   |                            |                          |                          |                  |                   |
| positive for COVID-19                                      | Azar K (USA; rc)               | 1,052                             | 1.2                        | 0.76                     | 1.9                      | >0.05            | Good              |
| <b>Income percentile (51st to 75th vs. 25th and below)</b> |                                |                                   |                            |                          |                          |                  |                   |
| <b>Hospitalization</b>                                     |                                |                                   |                            |                          |                          |                  |                   |
| positive for COVID-19                                      | Azar K (USA; rc)               | 1,052                             | <b>0.24</b>                | <b>0.12</b>              | <b>0.46</b>              | <b>&lt;0.001</b> | Good              |
| <b>Income percentile (&gt;=75th vs. 25th and below)</b>    |                                |                                   |                            |                          |                          |                  |                   |
| <b>Hospitalization</b>                                     |                                |                                   |                            |                          |                          |                  |                   |
| positive for COVID-19                                      | Azar K (USA; rc)               | 1,052                             | <b>0.55</b>                | <b>0.33</b>              | <b>0.91</b>              | <b>&lt;0.05</b>  | Good              |

\* values are adjusted odds ratio, unless otherwise denoted

1  
2  
3 \*\* Townsend index incorporates unemployment, car & home (non-)ownership & household crowding  
4 \*\*\* Index of Multiple Deprivation is used within the UK and incorporates income, employment, education, health,  
5 crime, barriers to housing and services, and living environment  
6 aHR: adjusted hazards ratio; CI: confidence interval; COVID-19: novel coronavirus disease 2019; pc: prospective  
7 cohort; Q1-5: quartile (first to fifth); rc: retrospective cohort; UK: United Kingdom; USA: United States of America; vs.:  
8 versus  
9  
10  
11  
12  
13  
14  
15  
16  
17  
18  
19  
20  
21  
22  
23  
24  
25  
26  
27  
28  
29  
30  
31  
32  
33  
34  
35  
36  
37  
38  
39  
40  
41  
42  
43  
44  
45  
46  
47  
48  
49  
50  
51  
52  
53  
54  
55  
56  
57  
58  
59  
60

For peer review only

Table 19. Age

| Risk factor;<br>Outcome among<br>population                               | Study                      | Total<br>number<br>of<br>patients | Adjusted<br>odds<br>ratio* | 95% CI<br>lower<br>bound | 95% CI<br>upper<br>bound | p-value | Quality<br>rating |
|---------------------------------------------------------------------------|----------------------------|-----------------------------------|----------------------------|--------------------------|--------------------------|---------|-------------------|
| <b>Age (continuous or incremental)</b>                                    |                            |                                   |                            |                          |                          |         |                   |
| <b>Hospitalization</b>                                                    |                            |                                   |                            |                          |                          |         |                   |
| community sample                                                          | Lassale C (UK; pc)         | 340,966                           | 1.02                       | 1.01                     | 1.03                     | 0.003   | Fair              |
| community sample                                                          | Patel AP (UK; pc)          | 418,794                           | 1.02                       | 1                        | 1.03                     | 0.02    | Fair              |
| positive for COVID-19                                                     | Price-Haywood EG (USA; rc) | 3,481                             | 1.29                       | 1.25                     | 1.33                     | NR      | Good              |
| <b>ICU admission</b>                                                      |                            |                                   |                            |                          |                          |         |                   |
| hospitalized with COVID-19                                                | Busetto L (Italy; rc)      | 92                                | 0.97                       | 0.93                     | 1.01                     | 0.18    | Fair              |
| hospitalized with COVID-19                                                | Hajifathalian K (USA; rc)  | 770                               | aRR 1.01                   | 1.01                     | 1.02                     | 0.123   | Fair              |
| hospitalized with COVID-19                                                | Kalligeros M (USA; rc)     | 103                               | 1.03                       | 1                        | 1.07                     | 0.059   | Good              |
| <b>Mechanical ventilation</b>                                             |                            |                                   |                            |                          |                          |         |                   |
| hospitalized with COVID-19                                                | Busetto L (Italy; rc)      | 92                                | 0.97                       | 0.93                     | 1                        | 0.091   | Fair              |
| hospitalized with COVID-19                                                | Hajifathalian K (USA; rc)  | 770                               | aRR 1.01                   | 0.99                     | 1.01                     | 0.43    | Fair              |
| hospitalized with COVID-19                                                | Kalligeros M (USA; rc)     | 103                               | 1.02                       | 0.98                     | 1.06                     | 0.271   | Good              |
| hospitalized with COVID-19 (quartiles of age)                             | Palaiodimos L (USA; rc)    | 200                               | 1.5                        | 1.05                     | 2.12                     | 0.025   | Good              |
| <b>Severe disease</b>                                                     |                            |                                   |                            |                          |                          |         |                   |
| positive for COVID-19                                                     | Hajifathalian K (USA; rc)  | 1,059                             | 1.03                       | NR                       | NR                       | <0.001  | Fair              |
| death or transfer to the ICU (composite) among hospitalized with COVID-19 | Piano S (Italy)            | 565                               | 1.03                       | 1.01                     | 1.05                     | 0.012   | Good              |
| <b>Mortality</b>                                                          |                            |                                   |                            |                          |                          |         |                   |
| hospitalized with COVID-19                                                | Busetto L (Italy; rc)      | 92                                | 1.21                       | 1.05                     | 1.39                     | 0.007   | Fair              |
| hospitalized with COVID-19                                                | Perez-Guzman PN (UK; rc)   | 520                               | 2.16                       | 1.5                      | 3.12                     | <0.01   | Good              |
| hospitalized with COVID-19                                                | Violi F (Italy; rc)        | 319                               | aHR 1.03                   | 1.01                     | 1.06                     | 0.001   | Good              |
| hospitalized with COVID-19                                                | Hajifathalian K (USA; rc)  | 770                               | aRR 1.06                   | 1.04                     | 1.08                     | <0.001  | Fair              |
| hospitalized with COVID-19                                                | Borobia A (Spain; rc)      | 2,226                             | 1.11                       | 1.09                     | 1.12                     | <0.001  | Fair              |
| hospitalized with COVID-19                                                | Bianchetti A (Italy; rc)   | 627                               | 1.09                       | 1.07                     | 1.12                     | <0.001  | Fair              |
| hospitalized with COVID-19                                                | Okoh A (USA; rc)           | 251                               | 1.04                       | 1.01                     | 1.06                     | 0.003   | Good              |
| hospitalized with COVID-19                                                | Palaiodimos L (USA; rc)    | 200                               | 1.73                       | 1.13                     | 5.98                     | 0.011   | Good              |
| hospitalized with COVID-19 (5-year increase)                              | Price-Haywood EG (USA; rc) | 1,382                             | aHR 1.18                   | 1.13                     | 1.24                     | NR      | Good              |
| hospitalized with COVID-19 (10-year increase)                             | Cummings MJ (USA; pc)      | 257                               | aHR 1.31                   | 1.09                     | 1.57                     | NR      | Good              |
| hospitalized with COVID-19 (10-year increase)                             | Giacomelli A (Italy; pc)   | 233                               | aHR 2.08                   | 1.48                     | 2.9                      | <0.0001 | Good              |
| <b>45-54 vs. ≤45 years old**</b>                                          |                            |                                   |                            |                          |                          |         |                   |
| <b>Hospitalization</b>                                                    |                            |                                   |                            |                          |                          |         |                   |
| positive for COVID-19                                                     | Azar K (USA; rc)           | 1,052                             | 2.24                       | 1.13                     | 4.43                     | <0.05   | Good              |
| positive for COVID-19                                                     | Petrilli CM (USA; pc)      | 5,279                             | 2.14                       | 1.76                     | 2.59                     | <0.001  | Good              |
| <b>Severe Disease</b>                                                     |                            |                                   |                            |                          |                          |         |                   |

| Risk factor;<br>Outcome among<br>population | Study                          | Total<br>number<br>of<br>patients | Adjusted<br>odds<br>ratio* | 95% CI<br>lower<br>bound | 95% CI<br>upper<br>bound | p-value          | Quality<br>rating |
|---------------------------------------------|--------------------------------|-----------------------------------|----------------------------|--------------------------|--------------------------|------------------|-------------------|
| hospitalized with COVID-19                  | Petrilli CM (USA; pc)          | 2,725                             | 0.78                       | 0.54                     | 1.1                      | 0.21             | Good              |
| <b>Mortality</b>                            |                                |                                   |                            |                          |                          |                  |                   |
| hospitalized with COVID-19                  | Petrilli CM (USA; pc)          | 2,725                             | <b>1.95</b>                | <b>1.16</b>              | <b>3.31</b>              | <b>0.01</b>      | Good              |
| hospitalized with COVID-19                  | Public Health England (UK; rc) | 64,961                            | <b>aHR 3.33</b>            | <b>2.79</b>              | <b>3.99</b>              | <b>&lt;0.001</b> | Fair              |
| <b>50-64 vs. ≤45 years old**</b>            |                                |                                   |                            |                          |                          |                  |                   |
| <b>Hospitalization</b>                      |                                |                                   |                            |                          |                          |                  |                   |
| positive for COVID-19                       | Azar K (USA; rc)               | 1,052                             | <b>2.62</b>                | <b>1.37</b>              | <b>4.99</b>              | <b>&lt;0.01</b>  | Good              |
| positive for COVID-19                       | Petrilli CM (USA; pc)          | 5,279                             | <b>3.67</b>                | <b>3.01</b>              | <b>4.48</b>              | <b>&lt;0.001</b> | Good              |
| <b>Severe disease</b>                       |                                |                                   |                            |                          |                          |                  |                   |
| hospitalized with COVID-19                  | Petrilli CM (USA; pc)          | 2,725                             | 1.32                       | 0.93                     | 1.9                      | 0.12             | Good              |
| <b>Mortality</b>                            |                                |                                   |                            |                          |                          |                  |                   |
| hospitalized with COVID-19                  | Docherty AB (UK; pc)           | 20,133                            | <b>aHR 2.63</b>            | <b>2.06</b>              | <b>3.35</b>              | <b>&lt;0.001</b> | Good              |
| hospitalized with COVID-19                  | Petrilli CM (USA; pc)          | 2,725                             | <b>3.18</b>                | <b>1.93</b>              | <b>5.21</b>              | <b>&lt;0.001</b> | Good              |
| hospitalized with COVID-19                  | Public Health England (UK; rc) | 64,961                            | <b>aHR 8.94</b>            | <b>7.61</b>              | <b>10.5</b>              | <b>&lt;0.001</b> | Fair              |
| <b>&gt;60 vs. ≤45 years old</b>             |                                |                                   |                            |                          |                          |                  |                   |
| <b>Hospitalization</b>                      |                                |                                   |                            |                          |                          |                  |                   |
| positive for COVID-19                       | Azar K (USA; rc)               | 1,052                             | <b>4.62</b>                | <b>2.39</b>              | <b>9.95</b>              | <b>&lt;0.001</b> | Good              |
| positive for COVID-19                       | Petrilli CM (USA; pc)          | 5,279                             | <b>8.7</b>                 | <b>6.77</b>              | <b>11.22</b>             | <b>&lt;0.001</b> | Good              |
| <b>Severe disease</b>                       |                                |                                   |                            |                          |                          |                  |                   |
| hospitalized with COVID-19                  | Petrilli CM (USA; pc)          | 2,725                             | <b>1.73</b>                | <b>1.19</b>              | <b>2.5</b>               | <b>0.004</b>     | Good              |
| <b>Mechanical ventilation</b>               |                                |                                   |                            |                          |                          |                  |                   |
| hospitalized with COVID-19                  | Hur K (USA; rc)                | 486                               | <b>3.9</b>                 | <b>2.3</b>               | <b>6.76</b>              | <b>&lt;0.001</b> | Good              |
| <b>Mortality</b>                            |                                |                                   |                            |                          |                          |                  |                   |
| hospitalized with COVID-19                  | Imam (USA; rc)                 | 1,305                             | <b>1.93</b>                | <b>1.26</b>              | <b>2.94</b>              | <b>0.002</b>     | Fair              |
| hospitalized with COVID-19                  | Docherty AB (UK; pc)           | 20,133                            | <b>aHR 4.99</b>            | <b>3.99</b>              | <b>6.25</b>              | <b>&lt;0.001</b> | Good              |
| hospitalized with COVID-19                  | Petrilli CM (USA; pc)          | 2,725                             | <b>4.83</b>                | <b>2.93</b>              | <b>7.96</b>              | <b>&lt;0.001</b> | Good              |
| hospitalized with COVID-19                  | Public Health England (UK; rc) | 64,961                            | <b>aHR</b>                 | <b>19.01</b>             | <b>16.18</b>             | <b>22.35</b>     | <b>&lt;0.001</b>  |
| <b>&gt;70 vs. ≤45 years old</b>             |                                |                                   |                            |                          |                          |                  |                   |
| <b>Hospitalization</b>                      |                                |                                   |                            |                          |                          |                  |                   |
| positive for COVID-19                       | Azar K (USA; rc)               | 1,052                             | <b>5.68</b>                | <b>2.6</b>               | <b>12.38</b>             | <b>&lt;0.001</b> | Good              |
| positive for COVID-19                       | Petrilli CM (USA; pc)          | 5,279                             | <b>37.87</b>               | <b>26.1</b>              | <b>56.03</b>             | <b>&lt;0.001</b> | Good              |
| <b>Severe disease</b>                       |                                |                                   |                            |                          |                          |                  |                   |
| hospitalized with COVID-19                  | Petrilli CM (USA; pc)          | 2,725                             | <b>2.32</b>                | <b>1.57</b>              | <b>3.4</b>               | <b>&lt;0.001</b> | Good              |
| <b>Mortality</b>                            |                                |                                   |                            |                          |                          |                  |                   |
| hospitalized with COVID-19                  | Petrilli CM (USA; pc)          | 2,725                             | <b>7.69</b>                | <b>4.6</b>               | <b>12.84</b>             | <b>&lt;0.001</b> | Good              |
| hospitalized with COVID-19                  | Docherty AB (UK; pc)           | 20,133                            | <b>aHR 8.51</b>            | <b>6.85</b>              | <b>10.57</b>             | <b>&lt;0.001</b> | Good              |
| <b>&gt;80 vs. ≤45 years old</b>             |                                |                                   |                            |                          |                          |                  |                   |

| Risk factor;<br>Outcome among<br>population | Study                          | Total<br>number<br>of<br>patients | Adjusted<br>odds<br>ratio* | 95% CI<br>lower<br>bound | 95% CI<br>upper<br>bound | p-value          | Quality<br>rating |
|---------------------------------------------|--------------------------------|-----------------------------------|----------------------------|--------------------------|--------------------------|------------------|-------------------|
| <b>Hospitalization</b>                      |                                |                                   |                            |                          |                          |                  |                   |
| positive for COVID-19                       | Azar K (USA; rc)               | 1,052                             | <b>19.08</b>               | <b>7.86</b>              | <b>46.32</b>             | <b>&lt;0.001</b> | Good              |
| <b>Mortality</b>                            |                                |                                   |                            |                          |                          |                  |                   |
| hospitalized with COVID-19                  | Docherty AB (UK; pc)           | 20,133                            | <b>aHR 11.09</b>           | <b>8.93</b>              | <b>13.77</b>             | <b>&lt;0.001</b> | Good              |
| <b>70-79 vs. 65-69 years old</b>            |                                |                                   |                            |                          |                          |                  |                   |
| <b>Mortality</b>                            |                                |                                   |                            |                          |                          |                  |                   |
| hospitalized with COVID-19                  | Public Health England (UK; rc) | 63,094                            | <b>aHR 1.55</b>            | <b>1.47</b>              | <b>1.64</b>              | <b>&lt;0.001</b> | Fair              |
| <b>80-89 vs. 65-69 years old</b>            |                                |                                   |                            |                          |                          |                  |                   |
| <b>Mortality</b>                            |                                |                                   |                            |                          |                          |                  |                   |
| hospitalized with COVID-19                  | Public Health England (UK; rc) | 63,094                            | <b>aHR 2.15</b>            | <b>2.05</b>              | <b>2.26</b>              | <b>&lt;0.001</b> | Fair              |

\* values are adjusted odds ratio, unless otherwise denoted

\*\* the reference category differs slightly across studies

aHR: adjusted hazards ratio; CI: confidence interval; COVID-19: novel coronavirus disease 2019; ICU: intensive care unit; NR: not reported; pc: prospective cohort; rc: retrospective cohort; UK: United Kingdom; USA: United States of America; vs.: versus

Table 20. Other factors

| Risk factor;<br>Outcome among<br>population                    | Study                   | Total<br>number of<br>patients | Adjusted<br>odds<br>ratio* | 95% CI<br>lower<br>bound | 95% CI<br>upper<br>bound | p-value          | Quality<br>rating |
|----------------------------------------------------------------|-------------------------|--------------------------------|----------------------------|--------------------------|--------------------------|------------------|-------------------|
| <b>Smoking (current vs. never)</b>                             |                         |                                |                            |                          |                          |                  |                   |
| <b>Hospitalization</b>                                         |                         |                                |                            |                          |                          |                  |                   |
| positive for COVID-19                                          | Azar K (USA; rc)        | 1,052                          | 0.92                       | 0.31                     | 2.70                     | >0.05            | Good              |
| community sample                                               | Hamer (UK; pc)          | 387,109                        | <b>aRR 1.36</b>            | <b>1.08</b>              | <b>1.71</b>              | <b>NR</b>        | Fair              |
| community sample                                               | Lassale C (UK; pc)      | 340,966                        | 1.25                       | 0.96                     | 1.62                     | 0.095            | Fair              |
| community sample                                               | Patel AP (UK; pc)       | 418,794                        | 0.91                       | 0.66                     | 1.25                     | 0.55             | Fair              |
| positive for COVID-19                                          | Petrilli CM (USA; pc)   | 5,279                          | <b>0.59</b>                | <b>0.43</b>              | <b>0.81</b>              | <b>0.001</b>     | Good              |
| <b>Severe disease</b>                                          |                         |                                |                            |                          |                          |                  |                   |
| hospitalized with COVID-19                                     | Petrilli CM (USA; pc)   | 2,725                          | 0.82                       | 0.53                     | 1.3                      | 0.39             | Good              |
| <b>Mortality</b>                                               |                         |                                |                            |                          |                          |                  |                   |
| hospitalized with COVID-19                                     | Petrilli CM (USA; pc)   | 2,725                          | 0.92                       | 0.62                     | 1.38                     | 0.69             | Good              |
| <b>Smoking (former vs. never)</b>                              |                         |                                |                            |                          |                          |                  |                   |
| <b>Hospitalization</b>                                         |                         |                                |                            |                          |                          |                  |                   |
| community sample                                               | Hamer (UK; pc)          | 387,109                        | <b>aRR 1.36</b>            | <b>1.15</b>              | <b>1.59</b>              | <b>NR</b>        | Fair              |
| community sample                                               | Lassale C (UK; pc)      | 340,966                        | <b>1.3</b>                 | <b>1.1</b>               | <b>1.55</b>              | <b>0.003</b>     | Fair              |
| positive for COVID-19                                          | Petrilli CM (USA; pc)   | 5,279                          | <b>0.69</b>                | <b>0.56</b>              | <b>0.85</b>              | <b>&lt;0.001</b> | Good              |
| <b>Severe disease</b>                                          |                         |                                |                            |                          |                          |                  |                   |
| hospitalized with COVID-19                                     | Petrilli CM (USA; pc)   | 2,725                          | 1.05                       | 0.82                     | 1.3                      | 0.72             | Good              |
| <b>Mechanical ventilation</b>                                  |                         |                                |                            |                          |                          |                  |                   |
| hospitalized with COVID-19                                     | Petrilli CM (USA; pc)   | 2,725                          | 1.05                       | 0.82                     | 1.3                      | 0.72             | Good              |
| <b>Mortality</b>                                               |                         |                                |                            |                          |                          |                  |                   |
| hospitalized with COVID-19                                     | Petrilli CM (USA; pc)   | 2,725                          | 1.07                       | 0.88                     | 1.31                     | 0.49             | Good              |
| hospitalized with COVID-19                                     | Palaiodimos L (USA; rc) | 200                            | 0.83                       | 0.37                     | 1.87                     | 0.647            | Good              |
| <b>Smoking (former vs. current)</b>                            |                         |                                |                            |                          |                          |                  |                   |
| <b>Hospitalization</b>                                         |                         |                                |                            |                          |                          |                  |                   |
| positive for COVID-19                                          | Azar K (USA; rc)        | 1,052                          | 0.77                       | 0.25                     | 2.35                     | >0.05            | Good              |
| <b>Alcohol consumption (continuous)</b>                        |                         |                                |                            |                          |                          |                  |                   |
| <b>Hospitalization</b>                                         |                         |                                |                            |                          |                          |                  |                   |
| community sample                                               | Patel AP (UK; pc)       | 418,794                        | 1.04                       | 0.98                     | 1.11                     | 0.21             | Fair              |
| <b>Alcohol consumption (never/rarely vs. within guideline)</b> |                         |                                |                            |                          |                          |                  |                   |
| <b>Hospitalization</b>                                         |                         |                                |                            |                          |                          |                  |                   |
| community sample                                               | Hamer (UK; pc)          | 387,109                        | <b>aRR 1.57</b>            | <b>1.31</b>              | <b>1.88</b>              | <b>NR</b>        | Fair              |
| community sample                                               | Lassale C (UK; pc)      | 340,966                        | <b>1.3</b>                 | <b>1.07</b>              | <b>1.59</b>              | <b>0.01</b>      | Fair              |
| <b>Alcohol consumption (above vs. within guideline)</b>        |                         |                                |                            |                          |                          |                  |                   |
| <b>Hospitalization</b>                                         |                         |                                |                            |                          |                          |                  |                   |
| community sample                                               | Hamer (UK; pc)          | 387,109                        | <b>aRR 1.24</b>            | <b>1.03</b>              | <b>1.5</b>               | <b>NR</b>        | Fair              |
| community sample                                               | Lassale C (UK; pc)      | 340,966                        | 1.1                        | 0.9                      | 1.34                     | 0.368            | Fair              |
| <b>Rarely/never active vs. below guideline</b>                 |                         |                                |                            |                          |                          |                  |                   |



|                                                                                 |                    |         |                 |             |             |              |      |
|---------------------------------------------------------------------------------|--------------------|---------|-----------------|-------------|-------------|--------------|------|
| <b>Hospitalization</b>                                                          |                    |         |                 |             |             |              |      |
| community sample                                                                | Hamer (UK; pc)     | 387,109 | aRR 0.99        | 0.84        | 1.18        | NR           | Fair |
| <b>Rarely/never active vs. meeting guideline</b>                                |                    |         |                 |             |             |              |      |
| <b>Hospitalization</b>                                                          |                    |         |                 |             |             |              |      |
| community sample                                                                | Lassale C (UK; pc) | 340,966 | <b>1.22</b>     | <b>1</b>    | <b>1.48</b> | <b>0.049</b> | Fair |
| <b>Some activity (&gt;10 minutes but below guideline) vs. meeting guideline</b> |                    |         |                 |             |             |              |      |
| <b>Hospitalization</b>                                                          |                    |         |                 |             |             |              |      |
| community sample                                                                | Lassale C (UK; pc) | 340,966 | 0.93            | 0.77        | 1.13        | 0.466        | Fair |
| <b>Exceeding vs. meeting guideline</b>                                          |                    |         |                 |             |             |              |      |
| <b>Hospitalization</b>                                                          |                    |         |                 |             |             |              |      |
| community sample                                                                | Hamer (UK; pc)     | 387,109 | <b>aRR 1.24</b> | <b>1.03</b> | <b>1.5</b>  | <b>NR</b>    | Fair |

\* values are adjusted odds ratio, unless otherwise denoted

\*\* the reference category differs slightly across studies

aHR: adjusted hazards ratio; aRR: adjusted risk ratio; CI: confidence interval; COVID-19: novel coronavirus disease 2019; ICU: intensive care unit; NR: not reported; pc: prospective cohort; rc: retrospective cohort; UK: United Kingdom; USA: United States of America; vs.: versus

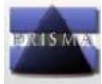

# PRISMA 2009 Checklist

1  
2  
3  
4  
5  
6  
7  
8  
9  
10  
11  
12  
13  
14  
15  
16  
17  
18  
19  
20  
21  
22  
23  
24  
25  
26  
27  
28  
29  
30  
31  
32  
33  
34  
35  
36  
37  
38  
39  
40  
41  
42  
43  
44  
45  
46  
47

| Section/topic                      | #  | Checklist item                                                                                                                                                                                                                                                                                              | Reported on page # |
|------------------------------------|----|-------------------------------------------------------------------------------------------------------------------------------------------------------------------------------------------------------------------------------------------------------------------------------------------------------------|--------------------|
| <b>TITLE</b>                       |    |                                                                                                                                                                                                                                                                                                             |                    |
| Title                              | 1  | Identify the report as a systematic review, meta-analysis, or both.                                                                                                                                                                                                                                         | 1, rapid review    |
| <b>ABSTRACT</b>                    |    |                                                                                                                                                                                                                                                                                                             |                    |
| Structured summary                 | 2  | Provide a structured summary including, as applicable: background; objectives; data sources; study eligibility criteria, participants, and interventions; study appraisal and synthesis methods; results; limitations; conclusions and implications of key findings; systematic review registration number. | 3                  |
| <b>INTRODUCTION</b>                |    |                                                                                                                                                                                                                                                                                                             |                    |
| Rationale                          | 3  | Describe the rationale for the review in the context of what is already known.                                                                                                                                                                                                                              | 4                  |
| Objectives                         | 4  | Provide an explicit statement of questions being addressed with reference to participants, interventions, comparisons, outcomes, and study design (PICOS).                                                                                                                                                  | 4                  |
| <b>METHODS</b>                     |    |                                                                                                                                                                                                                                                                                                             |                    |
| Protocol and registration          | 5  | Indicate if a review protocol exists, if and where it can be accessed (e.g., Web address), and, if available, provide registration information including registration number.                                                                                                                               | 3 (Abstract); 5    |
| Eligibility criteria               | 6  | Specify study characteristics (e.g., PICOS, length of follow-up) and report characteristics (e.g., years considered, language, publication status) used as criteria for eligibility, giving rationale.                                                                                                      | 6                  |
| Information sources                | 7  | Describe all information sources (e.g., databases with dates of coverage, contact with study authors to identify additional studies) in the search and date last searched.                                                                                                                                  | 5                  |
| Search                             | 8  | Present full electronic search strategy for at least one database, including any limits used, such that it could be repeated.                                                                                                                                                                               | Supplement 1       |
| Study selection                    | 9  | State the process for selecting studies (i.e., screening, eligibility, included in systematic review, and, if applicable, included in the meta-analysis).                                                                                                                                                   | 6-7                |
| Data collection process            | 10 | Describe method of data extraction from reports (e.g., piloted forms, independently, in duplicate) and any processes for obtaining and confirming data from investigators.                                                                                                                                  | 7                  |
| Data items                         | 11 | List and define all variables for which data were sought (e.g., PICOS, funding sources) and any assumptions and simplifications made.                                                                                                                                                                       | 7                  |
| Risk of bias in individual studies | 12 | Describe methods used for assessing risk of bias of individual studies (including specification of whether this was done at the study or outcome level), and how this information is to be used in any data synthesis.                                                                                      | 7                  |
| Summary measures                   | 13 | State the principal summary measures (e.g., risk ratio, difference in means).                                                                                                                                                                                                                               | 7                  |

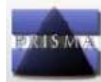

# PRISMA 2009 Checklist

Page 1 of 2

|   |                      |    |                                                                                                                                                           |   |
|---|----------------------|----|-----------------------------------------------------------------------------------------------------------------------------------------------------------|---|
| 4 | Synthesis of results | 14 | Describe the methods of handling data and combining results of studies, if done, including measures of consistency (e.g., $I^2$ ) for each meta-analysis. | 7 |
|---|----------------------|----|-----------------------------------------------------------------------------------------------------------------------------------------------------------|---|

| 8  | Section/topic               | #  | Checklist item                                                                                                                                   | Reported on page # |
|----|-----------------------------|----|--------------------------------------------------------------------------------------------------------------------------------------------------|--------------------|
| 11 | Risk of bias across studies | 15 | Specify any assessment of risk of bias that may affect the cumulative evidence (e.g., publication bias, selective reporting within studies).     | 7                  |
| 13 | Additional analyses         | 16 | Describe methods of additional analyses (e.g., sensitivity or subgroup analyses, meta-regression), if done, indicating which were pre-specified. | Not applicable     |

## 16 RESULTS

|    |                               |    |                                                                                                                                                                                                          |                                    |
|----|-------------------------------|----|----------------------------------------------------------------------------------------------------------------------------------------------------------------------------------------------------------|------------------------------------|
| 17 | Study selection               | 17 | Give numbers of studies screened, assessed for eligibility, and included in the review, with reasons for exclusions at each stage, ideally with a flow diagram.                                          | 8;<br>Supplement 3                 |
| 21 | Study characteristics         | 18 | For each study, present characteristics for which data were extracted (e.g., study size, PICOS, follow-up period) and provide the citations.                                                             | 8;<br>Supplement 4                 |
| 24 | Risk of bias within studies   | 19 | Present data on risk of bias of each study and, if available, any outcome level assessment (see item 12).                                                                                                | Supplement 4                       |
| 27 | Results of individual studies | 20 | For all outcomes considered (benefits or harms), present, for each study: (a) simple summary data for each intervention group (b) effect estimates and confidence intervals, ideally with a forest plot. | Supplement 5                       |
| 29 | Synthesis of results          | 21 | Present results of each meta-analysis done, including confidence intervals and measures of consistency.                                                                                                  | 16-17;<br>Table 2;<br>Supplement 5 |
| 34 | Risk of bias across studies   | 22 | Present results of any assessment of risk of bias across studies (see Item 15).                                                                                                                          | 11                                 |
| 35 | Additional analysis           | 23 | Give results of additional analyses, if done (e.g., sensitivity or subgroup analyses, meta-regression [see Item 16]).                                                                                    | Not applicable                     |

## 38 DISCUSSION

|    |                     |    |                                                                                                                                                                                      |       |
|----|---------------------|----|--------------------------------------------------------------------------------------------------------------------------------------------------------------------------------------|-------|
| 39 | Summary of evidence | 24 | Summarize the main findings including the strength of evidence for each main outcome; consider their relevance to key groups (e.g., healthcare providers, users, and policy makers). | 17-18 |
| 42 | Limitations         | 25 | Discuss limitations at study and outcome level (e.g., risk of bias), and at review-level (e.g., incomplete retrieval of identified research, reporting bias).                        | 18    |
| 44 | Conclusions         | 26 | Provide a general interpretation of the results in the context of other evidence, and implications for future research.                                                              | 18-19 |

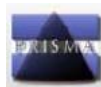

# PRISMA 2009 Checklist

1  
2  
3  
4  
5  
6  
7  
8  
9  
10  
11  
12  
13  
14  
15  
16  
17  
18  
19  
20  
21  
22  
23  
24  
25  
26  
27  
28  
29  
30  
31  
32  
33  
34  
35  
36  
37  
38  
39  
40  
41  
42  
43  
44  
45  
46  
47

| FUNDING |    |                                                                                                                                            |   |
|---------|----|--------------------------------------------------------------------------------------------------------------------------------------------|---|
| Funding | 27 | Describe sources of funding for the systematic review and other support (e.g., supply of data); role of funders for the systematic review. | 2 |

From: Moher D, Liberati A, Tetzlaff J, Altman DG, The PRISMA Group (2009). Preferred Reporting Items for Systematic Reviews and Meta-Analyses: The PRISMA Statement. PLoS Med 6(7): e1000097. doi:10.1371/journal.pmed1000097

For more information, visit: [www.prisma-statement.org](http://www.prisma-statement.org).

Page 2 of 2

For peer review only
