# Supplementary material for: Risk factors for severity of COVID-19: a rapid review to inform vaccine prioritisation in Canada
Source: PubMed Central journal article supplement — BMJ Open. 2021 May 13;11(5):e044684. doi: 10.1136/bmjopen-2020-044684 (PMC8126435; doi:10.1136/bmjopen-2020-044684), 2021-05-13
Supplement: bmjopen-2020-044684supp001.pdf [file bmjopen-2020-044684supp001.pdf]

**Supplement File**

| <b>Supplement</b> | <b>Title</b>                               | <b>Page</b> |
|-------------------|--------------------------------------------|-------------|
| 1                 | Search strategy                            | 2           |
| 2                 | Eligibility criteria                       | 4           |
| 3                 | Excluded studies                           | 6           |
| 4                 | Characteristics of included studies        | 73          |
| 5                 | All results data from the included studies | 84          |

**Supplement 1. Search strategy****Ovid MEDLINE(R) All 1946 to June 15, 2020**

|    |                                                                                                                                                                                                                                                                                                                                                                                                                                                                                                                                                                                                                                                                                                                                                                                                                                                            |
|----|------------------------------------------------------------------------------------------------------------------------------------------------------------------------------------------------------------------------------------------------------------------------------------------------------------------------------------------------------------------------------------------------------------------------------------------------------------------------------------------------------------------------------------------------------------------------------------------------------------------------------------------------------------------------------------------------------------------------------------------------------------------------------------------------------------------------------------------------------------|
| 1  | (Risk factor* or relative risk or odds ratio or between group* or Regression or multi-variate or multivaria* or covariate or univariate or co-variate or matching or ANOVA or Analysis of variance or ANCOVA or Correlation or Covariance or Principal Component Analysis or cohort* or follow-up or prognos* or predict*).mp.                                                                                                                                                                                                                                                                                                                                                                                                                                                                                                                             |
| 2  | exp cohort studies/ or cohort*.mp.                                                                                                                                                                                                                                                                                                                                                                                                                                                                                                                                                                                                                                                                                                                                                                                                                         |
| 3  | ("Associated with" or "Association of" or "impact of" or "Correlated with" or "Impact* on" or characteristics or characterise or features or clinical findings or clinical outcomes or clinical manifestations or clinical course).ti.                                                                                                                                                                                                                                                                                                                                                                                                                                                                                                                                                                                                                     |
| 4  | (clinical data or (clinical adj5 (characteristics or features or manifestations))).tw,kf.                                                                                                                                                                                                                                                                                                                                                                                                                                                                                                                                                                                                                                                                                                                                                                  |
| 5  | 1 or 2 or 3 or 4                                                                                                                                                                                                                                                                                                                                                                                                                                                                                                                                                                                                                                                                                                                                                                                                                                           |
| 6  | (Mortal* or fatal* or death* or died or discharged alive or poor prognos* or good prognos* or clinical outcome* or adverse outcome* or disease course or clinical course or ((severe* or serious* or critical*) adj4 (ill* or outcome* or course or case or cases or patient* or condition)) or Severity or ((ICU or hospital or intensive care) adj7 (admission* or admit*)) or Ventilator* or ventilation or Hospitaliz* or hospitalis* or (Length adj3 stay)).mp.                                                                                                                                                                                                                                                                                                                                                                                       |
| 7  | ((pregnan* or maternal or perinatal or birth or neonat* or infant*) adj7 outcome*).mp.                                                                                                                                                                                                                                                                                                                                                                                                                                                                                                                                                                                                                                                                                                                                                                     |
| 8  | 6 or 7                                                                                                                                                                                                                                                                                                                                                                                                                                                                                                                                                                                                                                                                                                                                                                                                                                                     |
| 9  | 5 and 8                                                                                                                                                                                                                                                                                                                                                                                                                                                                                                                                                                                                                                                                                                                                                                                                                                                    |
| 10 | (Coronavirus* or corona-virus* or betacoronavirus* or nCOV* or 2019nCoV or 2019-ncov or covid or covid19 or SARS-CoV*or SARSCov*).mp.                                                                                                                                                                                                                                                                                                                                                                                                                                                                                                                                                                                                                                                                                                                      |
| 11 | limit 10 to yr="2020 -Current"                                                                                                                                                                                                                                                                                                                                                                                                                                                                                                                                                                                                                                                                                                                                                                                                                             |
| 12 | limit 11 to abstracts                                                                                                                                                                                                                                                                                                                                                                                                                                                                                                                                                                                                                                                                                                                                                                                                                                      |
| 13 | (11 not 12) and (1 or 2 or 3 or 4 or 6 or 7)                                                                                                                                                                                                                                                                                                                                                                                                                                                                                                                                                                                                                                                                                                                                                                                                               |
| 14 | 9 and 11                                                                                                                                                                                                                                                                                                                                                                                                                                                                                                                                                                                                                                                                                                                                                                                                                                                   |
| 15 | 13 or 14                                                                                                                                                                                                                                                                                                                                                                                                                                                                                                                                                                                                                                                                                                                                                                                                                                                   |
| 16 | (exp China/ or Iran/ or exp Russia/) not (canada/ or exp united states/ or europe/ or austria/ or belgium/ or exp france/ or exp germany/ or exp united kingdom/ or exp italy/ or spain/ or netherlands/ or exp "scandinavian and nordic countries"/ or australia/ or new zealand/ or mexico/ or chile/ or colombia/ or exp japan/ or korea/ or exp "republic of korea"/ or baltimore/ or berlin/ or boston/ or chicago/ or "district of columbia"/ or london/ or los angeles/ or new orleans/ or new york city/ or paris/ or philadelphia/ or rome/ or san francisco/ or estonia/ or latvia/ or lithuania/ or czech republic/ or hungary/ or poland/ or slovakia/ or slovenia/ or greece/ or luxembourg/ or portugal/ or switzerland/ or israel/ or turkey/)                                                                                              |
| 17 | ((China or wuhan or hubei or beijing).tw,kf. and china.in.) not (canada or italy or italian or spain or spanish or france or french or united kingdom or UK or england or english or NHS or ireland or irish or wales or welsh or scotland or scottish or german* or austria* or sweden or swedish or netherlands or norwegian or norway or finland or finnish or denmark or danish or european or belgium or belgian or Czech or Estonia* or Greece or Greek or Hungar* or Latvia* or Lithuania* or Luxembourg or Iceland* or Poland or Portugal or Slovak Republic or Slovenia* or Switzerland or Japan* or Tokyo or Korea* or Seoul or Chile* or Colombia* or Mexico or Mexican or Israel* or Turkey or Turkish or australia* or new zealand* or united states or USA or american or "U.S." or new york or california* or washington or seattle).tw,kf. |

|    |                                                                                                                                                                                                                                                                                                                                                                                                                                                                                                                                                                                                                                                                                                                                                                                                                                             |
|----|---------------------------------------------------------------------------------------------------------------------------------------------------------------------------------------------------------------------------------------------------------------------------------------------------------------------------------------------------------------------------------------------------------------------------------------------------------------------------------------------------------------------------------------------------------------------------------------------------------------------------------------------------------------------------------------------------------------------------------------------------------------------------------------------------------------------------------------------|
| 18 | ((russia* or iran* or tehran or brazil*) not (canada or italy or italian or spain or spanish or france or french or united kingdom or UK or england or english or NHS or ireland or irish or wales or welsh or scotland or scottish or german* or austria* or sweden or swedish or netherlands or norwegian or norway or finland or finnish or denmark or danish or european or belgium or belgian or Czech or Estonia* or Greece or Greek or Hungar* or Latvia* or Lithuania* or Luxembourg or Iceland* or Poland or Portugal or Slovak Republic or Slovenia* or Switzerland or Japan* or Tokyo or Korea* or Seoul or Chile* or Colombia* or Mexico or Mexican or Israel* or Turkey or Turkish or australia* or new zealand* or united states or USA or american or "U.S." or new york or california* or washington or seattle)).tw,kf.    |
| 19 | ((china or russia or iran or tehran or Brazil) not (canada or italy or italian or spain or spanish or france or french or united kingdom or UK or england or english or NHS or ireland or irish or wales or welsh or scotland or scottish or german* or austria* or sweden or swedish or netherlands or norwegian or norway or finland or finnish or denmark or danish or european or belgium or belgian or Czech or Estonia* or Greece or Greek or Hungar* or Latvia* or Lithuania* or Luxembourg or Iceland* or Poland or Portugal or Slovak Republic or Slovenia* or Switzerland or Japan* or Tokyo or Korea* or Seoul or Chile* or Colombia* or Mexico or Mexican or Israel* or Turkey or Turkish or australia* or new zealand* or united states or USA or american or "U.S." or new york or california* or washington or seattle)).in. |
| 20 | 15 not (16 or 17 or 18 or 19)                                                                                                                                                                                                                                                                                                                                                                                                                                                                                                                                                                                                                                                                                                                                                                                                               |
| 21 | limit 20 to (english or french)                                                                                                                                                                                                                                                                                                                                                                                                                                                                                                                                                                                                                                                                                                                                                                                                             |
| 22 | limit 21 to editorial                                                                                                                                                                                                                                                                                                                                                                                                                                                                                                                                                                                                                                                                                                                                                                                                                       |
| 23 | 21 not 22                                                                                                                                                                                                                                                                                                                                                                                                                                                                                                                                                                                                                                                                                                                                                                                                                                   |
| 24 | Remove duplicates from 23                                                                                                                                                                                                                                                                                                                                                                                                                                                                                                                                                                                                                                                                                                                                                                                                                   |

### Online databases, hand-searched up to June 12, 2020:

Epistimonikos COVID-19 in L\*VE Platform (epidemiology, etiology and prognosis questions) at: [https://app.iloveevidence.com/loves/5e6fdb9669c00e4ac072701d?utm=epdb\\_en](https://app.iloveevidence.com/loves/5e6fdb9669c00e4ac072701d?utm=epdb_en)

McMaster COVID-19 Evidence Alerts (prognosis or etiology studies) at: <https://plus.mcmaster.ca/COVID-19/>

**Supplement 2. Eligibility criteria**

| <b>Criterion</b>                | <b>Include</b>                                                                                                                                                                                                                                                                                                                                                                                                                                                                                                                                                                                                                                                                                                                                                                                                                                                                                                                                                                                                                                                                                    | <b>Exclude</b>                                                                                                                                                                                                                                                                             |
|---------------------------------|---------------------------------------------------------------------------------------------------------------------------------------------------------------------------------------------------------------------------------------------------------------------------------------------------------------------------------------------------------------------------------------------------------------------------------------------------------------------------------------------------------------------------------------------------------------------------------------------------------------------------------------------------------------------------------------------------------------------------------------------------------------------------------------------------------------------------------------------------------------------------------------------------------------------------------------------------------------------------------------------------------------------------------------------------------------------------------------------------|--------------------------------------------------------------------------------------------------------------------------------------------------------------------------------------------------------------------------------------------------------------------------------------------|
| <b>Population/<br/>Exposure</b> | <p>P<sup>2</sup>ROGRESS risk factors<sup>1</sup>, with or without infection with COVID-19<sup>2</sup></p> <p><sup>1</sup>Risk factors include:</p> <ul style="list-style-type: none"> <li>- Pre-existing disease/condition, disability (e.g., chronic disease, immunocompromised, pregnancy)</li> <li>- Place/state of residence (e.g., remote, overcrowding, homeless, institutionalization)</li> <li>- Race/ethnicity/culture/language/immigrant/refugee status</li> <li>- Occupation</li> <li>- Gender identity/sex</li> <li>- Religion/belief system</li> <li>- Education/literacy level</li> <li>- Socio-economic status</li> <li>- Social capital (e.g., social support/networks/trust)</li> <li>- Age</li> <li>- Other (risk behaviours e.g., drug and alcohol use disorders, smoking)</li> </ul> <p><sup>2</sup>COVID-19 infection may include lab-confirmed, or epidemiologically-linked cases (e.g., transmission/cases within households). Cases with co-infections (e.g., influenza such as H1N1) will be accepted, but may be analyzed separately from COVID-19-only infections.</p> | <p>Studies including populations with pandemic-related infections (e.g., SARS, MERS) without data isolated for COVID-19</p>                                                                                                                                                                |
| <b>Comparator</b>               | <p>Staged, in the following order:</p> <ol style="list-style-type: none"> <li>i) The same P<sup>2</sup>ROGRESS factor experienced differently or to a different degree (e.g., higher or lower socioeconomic status, higher or lower literacy level) or the absence of a P<sup>2</sup>ROGRESS factor (e.g., non-refugee; no pre-existing disease).</li> <li>ii) None (in some circumstances such as pregnancy and immunocompromised)</li> </ol>                                                                                                                                                                                                                                                                                                                                                                                                                                                                                                                                                                                                                                                    | <p>Not applicable</p>                                                                                                                                                                                                                                                                      |
| <b>Outcomes</b>                 | <p>Primary outcomes<sup>3</sup></p> <ul style="list-style-type: none"> <li>- Hospitalization rate (including readmissions)</li> <li>- Hospital length of stay (binary or continuous)</li> <li>- Admission to ICU</li> <li>- ICU length of stay (binary or continuous)</li> <li>- Need for mechanical ventilation</li> <li>- Case fatality</li> <li>- All-cause fatality</li> <li>- Severe or critical infection (composite; as defined by authors)</li> </ul> <p><sup>3</sup>Data may be extracted for outcomes listed above for the following population denominators, in order of priority:</p> <ol style="list-style-type: none"> <li>i) General population</li> <li>ii) Population positive for COVID-19</li> <li>iii) Population hospitalized for COVID-19</li> <li>iv) Population with a risk factor</li> </ol>                                                                                                                                                                                                                                                                             | <p>COVID-19 infection requiring outpatient treatment (e.g., treatment at primary care office, attendance at ED)</p> <p>Hospitalization for an illness other than COVID-19 infection</p> <p>Outcomes post-hospital discharge (e.g., readmissions unrelated to index COVID-19 infection)</p> |
| <b>Timing</b>                   | <p>Any follow-up duration</p>                                                                                                                                                                                                                                                                                                                                                                                                                                                                                                                                                                                                                                                                                                                                                                                                                                                                                                                                                                                                                                                                     | <p>Not applicable</p>                                                                                                                                                                                                                                                                      |

| <b>Criterion</b>    | <b>Include</b>                                                                                                                                                         | <b>Exclude</b>                        |
|---------------------|------------------------------------------------------------------------------------------------------------------------------------------------------------------------|---------------------------------------|
| <b>Setting</b>      | OECD countries ( <a href="https://www.oecd.org/about/document/list-oecd-member-countries.htm">https://www.oecd.org/about/document/list-oecd-member-countries.htm</a> ) | Non-OECD countries                    |
| <b>Study design</b> | Prospective and retrospective cohort studies                                                                                                                           | Studies of interventions/treatments   |
| <b>Language</b>     | Full text in English or French; pre-prints if accepted for publication in a peer-reviewed journal.                                                                     | Language other than English or French |

COVID-19: novel coronavirus 2019; ED: emergency department; ICU: intensive care unit; MERS: Middle East Respiratory Syndrome; MV: mechanical ventilation; OECD: Organisation for Economic Co-operation and Development; SARS: severe acute respiratory syndrome

**Supplement 3. Excluded studies****Excluded – case series (n=87)**

1. Akdur A, Karakaya E, Ayvazoglu Soy EH, Alshalabi O, Kirnap M, Arslan H, et al. Coronavirus Disease (COVID-19) in Kidney and Liver Transplant Patients: A Single-Center Experience. *Exp Clin Transplant*. 2020;18(3):270-4.
2. Albalate M, Arribas P, Torres E, Cintra M, Alcazar R, Puerta M, et al. High prevalence of asymptomatic COVID-19 in haemodialysis: learning day by day in the first month of the COVID-19 pandemic. *Alta prevalencia de COVID-19 asintomatico en hemodialisis Aprendiendo dia a dia el primer mes de pandemia de COVID-19*. 2020.
3. Alberici F, Delbarba E, Manenti C, Econimo L, Valerio F, Pola A, et al. A report from the Brescia Renal COVID Task Force on the clinical characteristics and short-term outcome of hemodialysis patients with SARS-CoV-2 infection. *Kidney international*. 2020.
4. Alberici F, Delbarba E, Manenti C, Econimo L, Valerio F, Pola A, et al. A single center observational study of the clinical characteristics and short-term outcome of 20 kidney transplant patients admitted for SARS-CoV2 pneumonia. *Kidney international*. 2020;97(6):1083-8.
5. Aries JA, Davies JK, Auer RL, Hallam SL, Montoto S, Smith M, et al. Clinical outcome of coronavirus disease 2019 in haemato-oncology patients. *British journal of haematology*. 2020.
6. Arslan H, Musabak U, Ayvazoglu Soy EH, Kurt Azap O, Sayin B, Akcay S, et al. Incidence and Immunologic Analysis of Coronavirus Disease (COVID-19) in Hemodialysis Patients: A Single-Center Experience. *Experimental and clinical transplantation : official journal of the Middle East Society for Organ Transplantation*. 2020;18(3):275-83.
7. Bezzio C, Saibeni S, Variola A, Allocca M, Massari A, Gerardi V, et al. Outcomes of COVID-19 in 79 patients with IBD in Italy: an IG-IBD study. *Gut*. 2020;69(7):1213-7.
8. Biagi A, Rossi L, Malagoli A, Zanni A, Sticozzi C, Comastri G, et al. Clinical and epidemiological characteristics of 320 deceased patients with COVID-19 in an Italian Province: A retrospective observational study. *J Med Virol*. 2020.
9. Bode B, Garrett V, Messler J, McFarland R, Crowe J, Booth R, et al. Glycemic Characteristics and Clinical Outcomes of COVID-19 Patients Hospitalized in the United States. *Journal of diabetes science and technology*. 2020:1932296820924469.
10. Breazzano MP, Shen J, Abdelhakim AH, Dagi Glass L, Horowitz J, Xie SX, et al. New York City COVID-19 resident physician exposure during exponential phase of pandemic. *The Journal of clinical investigation*. 2020.
11. Breazzano MP, Shen J, Abdelhakim AH, Glass LRD, Horowitz JD, Xie SX, et al. Resident physician exposure to novel coronavirus (2019-nCoV, SARS-CoV-2) within New York City during exponential phase of COVID-19 pandemic: Report of the New York City Residency Program Directors COVID-19 Research Group. *medRxiv : the preprint server for health sciences*. 2020.

12. Brenner EJ, Ungaro RC, Geary RB, Kaplan GG, Kissous-Hunt M, Lewis JD, et al. Corticosteroids, but not TNF Antagonists, are Associated with Adverse COVID-19 Outcomes in Patients With Inflammatory Bowel Diseases: Results from an International Registry. *Gastroenterology*. 2020.
13. Cariou B, Hadjadj S, Wargny M, Pichelin M, Al-Salameh A, Allix I, et al. Phenotypic characteristics and prognosis of inpatients with COVID-19 and diabetes: the CORONADO study. *Diabetologia*. 2020.
14. Caron B, Arondel Y, Reimund J-M. Covid-19 and inflammatory bowel disease: questions on incidence, severity, and impact of treatment? *Clinical gastroenterology and hepatology : the official clinical practice journal of the American Gastroenterological Association*. 2020.
15. Chao JY, Derespina KR, Herold BC, Goldman DL, Aldrich M, Weingarten J, et al. Clinical Characteristics and Outcomes of Hospitalized and Critically Ill Children and Adolescents with Coronavirus Disease 2019 (COVID-19) at a Tertiary Care Medical Center in New York City. *The Journal of pediatrics*. 2020.
16. Columbia University Kidney Transplant P. Early Description of Coronavirus 2019 Disease in Kidney Transplant Recipients in New York. *Journal of the American Society of Nephrology : JASN*. 2020;31(6):1150-6.
17. Cook G, John Ashcroft A, Pratt G, Popat R, Ramasamy K, Kaiser M, et al. Real-world assessment of the clinical impact of symptomatic infection with severe acute respiratory syndrome coronavirus (COVID-19 disease) in patients with multiple myeloma receiving systemic anti-cancer therapy. *British journal of haematology*. 2020.
18. Crespo M, Pérez-Sáez MJ, Redondo-Pachón D, Llinàs-Mallol L, Montero MM, Villar-García J, et al. COVID-19 in elderly kidney transplant recipients. *Am J Transplant*. 2020.
19. de Marinis F, Attili I, Morganti S, Stati V, Spitaleri G, Gianoncelli L, et al. Results of Multilevel Containment Measures to Better Protect Lung Cancer Patients From COVID-19: The IEO Model. *Frontiers in oncology*. 2020;10:665.
20. de Rojas T, Perez-Martinez A, Cela E, Baragano M, Galan V, Mata C, et al. COVID-19 infection in children and adolescents with cancer in Madrid. *Pediatric blood & cancer*. 2020;67(7):e28397.
21. Edler C, Schroder AS, Aepfelbacher M, Fitzek A, Heinemann A, Heinrich F, et al. Dying with SARS-CoV-2 infection-an autopsy study of the first consecutive 80 cases in Hamburg, Germany. *International journal of legal medicine*. 2020.
22. Egol KA, Konda SR, Bird ML, Dedhia N, Landes EK, Ranson RA, et al. Increased Mortality and Major Complications in Hip Fracture Care During the COVID-19 Pandemic: A New York City Perspective. *Journal of orthopaedic trauma*. 2020.
23. Emmi G, Bettiol A, Mattioli I, Silvestri E, Di Scala G, Urban ML, et al. SARS-CoV-2 infection among patients with systemic autoimmune diseases. *Autoimmun Rev*. 2020;19(7):102575.

24. Fattizzo B, Giannotta JA, Sciume M, Cattaneo D, Bucelli C, Fracchiolla NS, et al. Reply to "COVID-19 in persons with haematological cancers": a focus on myeloid neoplasms and risk factors for mortality. *Leukemia*. 2020.
25. Felice C, Nardin C, Di Tanna GL, Grossi U, Bernardi E, Scaldaferrri L, et al. Use of RAAS inhibitors and risk of clinical deterioration in COVID-19: results from an Italian cohort of 133 hypertensives. *American journal of hypertension*. 2020.
26. Fox SE, Akmatbekov A, Harbert JL, Li G, Quincy Brown J, Vander Heide RS. Pulmonary and cardiac pathology in African American patients with COVID-19: an autopsy series from New Orleans. *Lancet Respir Med*. 2020.
27. Fung M, Chiu CY, DeVoe C, Doernberg SB, Schwartz BS, Langelier C, et al. Clinical Outcomes and Serologic Response in Solid Organ Transplant Recipients with COVID-19: A Case Series from the United States. *American journal of transplantation : official journal of the American Society of Transplantation and the American Society of Transplant Surgeons*. 2020.
28. Gervasoni C, Meraviglia P, Riva A, Giacomelli A, Oreni L, Minisci D, et al. Clinical features and outcomes of HIV patients with coronavirus disease 2019. *Clinical infectious diseases : an official publication of the Infectious Diseases Society of America*. 2020.
29. Gianfrancesco M, Hyrich KL, Al-Adely S, Carmona L, Danila MI, Gossec L, et al. Characteristics associated with hospitalisation for COVID-19 in people with rheumatic disease: data from the COVID-19 Global Rheumatology Alliance physician-reported registry. *Annals of the rheumatic diseases*. 2020.
30. Gisondi P, Facheris P, Dapavo P, Piaserico S, Conti A, Naldi L, et al. The impact of the COVID-19 pandemic on patients with chronic plaque psoriasis being treated with biological therapy: the Northern Italy experience. *The British journal of dermatology*. 2020.
31. Goicoechea M, Sánchez Cámara LA, Macías N, Muñoz de Morales A, Rojas Á G, Bascuñana A, et al. COVID-19: clinical course and outcomes of 36 hemodialysis patients in Spain. *Kidney Int*. 2020;98(1):27-34.
32. Goldfarb IT, Clapp MA, Soffer MD, Shook LL, Rushfirth K, Edlow AG, et al. Prevalence and Severity of Coronavirus Disease 2019 (COVID-19) Illness in Symptomatic Pregnant and Postpartum Women Stratified by Hispanic Ethnicity. *Obstetrics and gynecology*. 2020.
33. Gubatan J, Levitte S, Patel A, Balabanis T, Sharma A, Jones E, et al. Prevalence, risk factors and clinical outcomes of COVID-19 in patients with a history of pancreatitis in Northern California. *Gut*. 2020.
34. Hirshberg A, Kern-Goldberger AR, Levine LD, Pierce-Williams R, Short WR, Parry S, et al. Care of critically ill pregnant patients with COVID-19: a case series. *American journal of obstetrics and gynecology*. 2020.
35. Husain SA, Dube G, Morris H, Fernandez H, Chang J-H, Paget K, et al. Early Outcomes of Outpatient Management of Kidney Transplant Recipients with Coronavirus Disease 2019. *Clinical journal of the American Society of Nephrology : CJASN*. 2020.
36. Iavarone M, D'Ambrosio R, Soria A, Triolo M, Pugliese N, Del Poggio P, et al. High rates of 30-day mortality in patients with cirrhosis and COVID-19. *Journal of hepatology*. 2020.



37. Jung HY, Lim JH, Kang SH, Kim SG, Lee YH, Lee J, et al. Outcomes of COVID-19 among Patients on In-Center Hemodialysis: An Experience from the Epicenter in South Korea. *J Clin Med*. 2020;9(6).
38. Khera R, Clark C, Lu Y, Guo Y, Ren S, Truax B, et al. Association of Angiotensin-Converting Enzyme Inhibitors and Angiotensin Receptor Blockers with the Risk of Hospitalization and Death in Hypertensive Patients with Coronavirus Disease-19. *medRxiv : the preprint server for health sciences*. 2020.
39. Knight M, Bunch K, Vousden N, Morris E, Simpson N, Gale C, et al. Characteristics and outcomes of pregnant women admitted to hospital with confirmed SARS-CoV-2 infection in UK: national population based cohort study. *BMJ (Clinical research ed)*. 2020;369:m2107.
40. Kuderer NM, Choueiri TK, Shah DP, Shyr Y, Rubinstein SM, Rivera DR, et al. Clinical impact of COVID-19 on patients with cancer (CCC19): a cohort study. *Lancet (London, England)*. 2020.
41. Kutlu Ö, Metin A. Dermatological diseases presented before COVID-19: Are patients with psoriasis and superficial fungal infections more vulnerable to the COVID-19? *Dermatol Ther*. 2020:e13509.
42. LeBrun DG, Konnaris MA, Ghahramani GC, Premkumar A, DeFrancesco CJ, Gruskay JA, et al. Hip Fracture Outcomes During the COVID-19 Pandemic: Early Results from New York. *Journal of orthopaedic trauma*. 2020.
43. Lee LYW, Cazier JB, Starkey T, Turnbull CD, Team UKCCMP, Kerr R, et al. COVID-19 mortality in patients with cancer on chemotherapy or other anticancer treatments: a prospective cohort study. *Lancet (London, England)*. 2020.
44. Lescure FX, Bouadma L, Nguyen D, Parisey M, Wicky PH, Behillil S, et al. Clinical and virological data of the first cases of COVID-19 in Europe: a case series. *The Lancet Infectious diseases*. 2020;20(6):697-706.
45. Lim J-H, Park S-H, Jeon Y, Cho J-H, Jung H-Y, Choi J-Y, et al. Fatal Outcomes of COVID-19 in Patients with Severe Acute Kidney Injury. *Journal of clinical medicine*. 2020;9(6).
46. Mannheim J, Gretsich S, Layden JE, Fricchione MJ. Characteristics of Hospitalized Pediatric COVID-19 Cases - Chicago, Illinois, March - April 2020. *Journal of the Pediatric Infectious Diseases Society*. 2020.
47. Marcault C, Fodil S, Dupont T, Darmon M, Azoulay E. In response to the letter of Montagud-Marrahi et al. *American journal of transplantation : official journal of the American Society of Transplantation and the American Society of Transplant Surgeons*. 2020.
48. Martin-Moro F, Marquet J, Piris M, Michael BM, Saez AJ, Corona M, et al. Survival study of hospitalised patients with concurrent COVID-19 and haematological malignancies. *British journal of haematology*. 2020.
49. Martinez-Perez O, Vouga M, Cruz Melguizo S, Forcen Acebal L, Panchaud A, Munoz-Chapuli M, et al. Association Between Mode of Delivery Among Pregnant Women With COVID-19 and Maternal and Neonatal Outcomes in Spain. *JAMA*. 2020.

50. Mathian A, Amoura Z. Response to: Correspondence regarding research letter to the editor by Mathian et al, 'Clinical course of coronavirus disease 2019 (COVID-19) in a series of 17 patients with systemic lupus under long-term treatment with hydroxychloroquine" by Nikpour et al. *Annals of the rheumatic diseases*. 2020.
51. Mathian A, Mahevas M, Rohmer J, Roumier M, Cohen-Aubart F, Amador-Borrero B, et al. Clinical course of coronavirus disease 2019 (COVID-19) in a series of 17 patients with systemic lupus erythematosus under long-term treatment with hydroxychloroquine. *Annals of the rheumatic diseases*. 2020;79(6):837-9.
52. Matsuo K, Novatt H, Matsuzaki S, Hom MS, Castaneda AV, Licon E, et al. Wait-time for hysterectomy and survival of women with early-stage cervical cancer: A clinical implication during the coronavirus pandemic. *Gynecol Oncol*. 2020;158(1):37-43.
53. Mehta V, Goel S, Kabarriti R, Cole D, Goldfinger M, Acuna-Villaorduna A, et al. Case Fatality Rate of Cancer Patients with COVID-19 in a New York Hospital System. *Cancer discovery*. 2020.
54. Meloni M, Izzo V, Giurato L, Gandini R, Uccioli L. Management of diabetic persons with foot ulceration during COVID-19 health care emergency: Effectiveness of a new triage pathway. *Diabetes research and clinical practice*. 2020;165:108245.
55. Mendoza M, Garcia-Ruiz I, Maiz N, Rodo C, Garcia-Manau P, Serrano B, et al. Pre-eclampsia-like syndrome induced by severe COVID-19: a prospective observational study. *Bjog*. 2020.
56. Menter T, Haslbauer JD, Nienhold R, Savic S, Deigendesch H, Frank S, et al. Postmortem examination of COVID-19 patients reveals diffuse alveolar damage with severe capillary congestion and variegated findings in lungs and other organs suggesting vascular dysfunction. *Histopathology*. 2020.
57. Michelle L, Meredith A, Rebecca C-S, Jun L, John L, Samuel S, et al. Kidney Allograft Recipients Diagnosed with Coronavirus Disease-2019: A Single Center Report. *medRxiv*. 2020.
58. Munoz Vives JM, Jornet-Gibert M, Camara-Cabrera J, Esteban PL, Brunet L, Delgado-Flores L, et al. Mortality Rates of Patients with Proximal Femoral Fracture in a Worldwide Pandemic: Preliminary Results of the Spanish HIP-COVID Observational Study. *The Journal of bone and joint surgery American volume*. 2020.
59. Parri N, Magista AM, Marchetti F, Cantoni B, Arrighini A, Romanengo M, et al. Characteristic of COVID-19 infection in pediatric patients: early findings from two Italian Pediatric Research Networks. *European journal of pediatrics*. 2020.
60. Pereira A, Cruz-Melguizo S, Adrien M, Fuentes L, Marin E, Perez-Medina T. Clinical course of coronavirus disease-2019 in pregnancy. *Acta obstetrica et gynecologica Scandinavica*. 2020.
61. Pereira MR, Mohan S, Cohen DJ, Husain SA, Dube GK, Ratner LE, et al. COVID-19 in solid organ transplant recipients: Initial report from the US epicenter. *American journal of transplantation : official journal of the American Society of Transplantation and the American Society of Transplant Surgeons*. 2020.

62. Pierce-Williams RAM, Burd J, Felder L, Khoury R, Bernstein PS, Avila K, et al. Clinical course of severe and critical COVID-19 in hospitalized pregnancies: a US cohort study. *American journal of obstetrics & gynecology MFM*. 2020;100134.
63. Quartuccio L, Valent F, Pasut E, Tascini C, De Vita S. Prevalence of COVID-19 among patients with chronic inflammatory rheumatic diseases treated with biologic agents or small molecules: A population-based study in the first two months of COVID-19 outbreak in Italy. *Joint Bone Spine*. 2020.
64. Razanamahery J, Soumagne T, Humbert S, Brunel AS, Lepiller Q, Daguindau E, et al. Does type of immunosuppression influence the course of Covid-19 infection? *The Journal of infection*. 2020.
65. Robilotti EV, Babady NE, Mead PA, Rolling T, Perez-Johnston R, Bernardes M, et al. Determinants of Severity in Cancer Patients with COVID-19 Illness. *medRxiv : the preprint server for health sciences*. 2020.
66. Rodriguez-Lago I, Ramirez de la Piscina P, Elorza A, Merino O, Ortiz de Zarate J, Cabriada JL. Characteristics and prognosis of patients with inflammatory bowel disease during the SARS-CoV-2 pandemic in the Basque Country (Spain). *Gastroenterology*. 2020.
67. Sabatino J, Ferrero P, Chessa M, Bianco F, Ciliberti P, Secinaro A, et al. COVID-19 and Congenital Heart Disease: Results from a Nationwide Survey. *Journal of clinical medicine*. 2020;9(6).
68. Safavi F, Nourbakhsh B, Azimi AR. B-cell depleting therapies may affect susceptibility to acute respiratory illness among patients with multiple sclerosis during the early COVID-19 epidemic in Iran. *Mult Scler Relat Disord*. 2020;43:102195.
69. Sanchez-Piedra C, Diaz-Torne C, Manero J, Pego-Reigosa JM, Rua-Figueroa I, Gonzalez-Gay MA, et al. Clinical features and outcomes of COVID-19 in patients with rheumatic diseases treated with biological and synthetic targeted therapies. *Annals of the rheumatic diseases*. 2020.
70. Shabto JM, Loerinc L, O'Keefe GA, O'Keefe J. Characteristics and outcomes of COVID-19 positive patients with diabetes managed as outpatients. *Diabetes research and clinical practice*. 2020;164:108229.
71. Shalev N, Scherer M, LaSota ED, Antoniou P, Yin MT, Zucker J, et al. Clinical characteristics and outcomes in people living with HIV hospitalized for COVID-19. *Clinical infectious diseases : an official publication of the Infectious Diseases Society of America*. 2020.
72. Stochino C, Villa S, Zucchi P, Parravicini P, Gori A, Raviglione MC. Clinical characteristics of COVID-19 and active tuberculosis co-infection in an Italian reference hospital. *The European respiratory journal*. 2020.
73. Tanu S, Sourabh P, Sunil P, Amit R. Hyperpyrexia leading to death in a patient with severe COVID-19 disease. *medRxiv*. 2020.
74. Team C-I. Clinical and virologic characteristics of the first 12 patients with coronavirus disease 2019 (COVID-19) in the United States. *Nature medicine*. 2020.

75. Tejada Meza H, Lambea A, Sancho Saldana A, Martinez-Zabaleta MT, de la Riva P, Lopez-Cancio E, et al. EXPRESS: Impact of COVID-19 outbreak in ischemic stroke admissions and in-hospital mortality in North-West Spain. *International journal of stroke : official journal of the International Stroke Society*. 2020:1747493020938301.
76. Topaktaş R, Tokuç E, Ali Kutluhan M, Akyüz M, Karabay E, Çalışkan S. Clinical features and outcomes of COVID-19 patients with benign prostatic hyperplasia in ageing male: A retrospective study of 18 cases. *Int J Clin Pract*. 2020:e13574.
77. Topaktas R, Tokuc E, Kutluhan MA, Akyuz M, Karabay E, Caliskan S. Clinical features and outcomes of COVID-19 patients with benign prostatic hyperplasia in aging male: A retrospective study of 18 cases. *International journal of clinical practice*. 2020:e13574.
78. Travi G, Rossotti R, Merli M, Sacco A, Perricone G, Lauterio A, et al. Clinical outcome in solid organ transplant recipients with COVID-19: A single-center experience. *American journal of transplantation : official journal of the American Society of Transplantation and the American Society of Transplant Surgeons*. 2020.
79. Trujillo H, Caravaca-Fontan F, Sevillano A, Gutierrez E, Caro J, Gutierrez E, et al. SARS-CoV-2 Infection in Hospitalized Patients with Kidney Disease. *Kidney international reports*. 2020.
80. Valeri AM, Robbins-Juarez SY, Stevens JS, Ahn W, Rao MK, Radhakrishnan J, et al. Presentation and Outcomes of Patients with ESKD and COVID-19. *Journal of the American Society of Nephrology : JASN*. 2020.
81. Verdoni L, Mazza A, Gervasoni A, Martelli L, Ruggeri M, Ciuffreda M, et al. An outbreak of severe Kawasaki-like disease at the Italian epicentre of the SARS-CoV-2 epidemic: an observational cohort study. *Lancet*. 2020;395(10239):1771-8.
82. Vizcarra P, Perez-Elias MJ, Quereda C, Moreno A, Vivancos MJ, Dronda F, et al. Description of COVID-19 in HIV-infected individuals: a single-centre, prospective cohort. *The lancet HIV*. 2020.
83. Webb GJ, Moon AM, Barnes E, Barritt AS, Marjot T. Determining risk factors for mortality in liver transplant patients with COVID-19. *The lancet Gastroenterology & hepatology*. 2020.
84. Whittaker E, Bamford A, Kenny J, Kaforou M, Jones CE, Shah P, et al. Clinical Characteristics of 58 Children With a Pediatric Inflammatory Multisystem Syndrome Temporally Associated With SARS-CoV-2. *JAMA*. 2020.
85. Yaghi S, Ishida K, Torres J, Mac Grory B, Raz E, Humbert K, et al. SARS-CoV-2 and Stroke in a New York Healthcare System. *Stroke*. 2020;51(7):2002-11.
86. Yamada T, Mikami T, Chopra N, Miyashita H, Chernyavsky S, Miyashita S. Patients with chronic kidney disease have a poorer prognosis of coronavirus disease 2019 (COVID-19): an experience in New York City. *International urology and nephrology*. 2020.
87. Zen M, Fuzzi E, Astorri D, Saccon F, Padoan R, Ienna L, et al. SARS-CoV-2 infection in patients with autoimmune rheumatic diseases in northeast Italy: A cross-sectional study on 916 patients. *Journal of autoimmunity*. 2020:102502.

**Excluded – country (n=240)**

1. Collaborative C. Mortality and pulmonary complications in patients undergoing surgery with perioperative SARS-CoV-2 infection: an international cohort study. *Lancet* (London, England). 2020.
2. Du H, Dong X, Zhang J-J, Cao Y-Y, Akdis M, Huang P-Q, et al. Clinical characteristics of 182 pediatric COVID-19 patients with different severities and allergic status. *Allergy*. 2020.
3. Fan J, Wang H, Ye G, Cao X, Xu X, Tan W, et al. Letter to the Editor: Low-density lipoprotein is a potential predictor of poor prognosis in patients with coronavirus disease 2019. *Metabolism: clinical and experimental*. 2020;107:154243.
4. Gao F, Zheng KI, Wang X-B, Sun Q-F, Pan K-H, Wang T-Y, et al. Obesity Is a Risk Factor for Greater COVID-19 Severity. *Diabetes care*. 2020.
5. Gao F, Zheng KI, Wang X-B, Yan H-D, Sun Q-F, Pan K-H, et al. Metabolic associated fatty liver disease increases coronavirus disease 2019 disease severity in nondiabetic patients. *Journal of gastroenterology and hepatology*. 2020.
6. Henry BM, de Oliveira MHS, Benoit S, Plebani M, Lippi G. Hematologic, biochemical and immune biomarker abnormalities associated with severe illness and mortality in coronavirus disease 2019 (COVID-19): a meta-analysis. *Clinical chemistry and laboratory medicine*. 2020.
7. Lagunas-Rangel FA. Neutrophil-to-lymphocyte ratio and lymphocyte-to-C-reactive protein ratio in patients with severe coronavirus disease 2019 (COVID-19): A meta-analysis. *Journal of medical virology*. 2020.
8. Lopic I, Rogic D, Plebani M. Erythrocyte sedimentation rate is associated with severe coronavirus disease 2019 (COVID-19): a pooled analysis. *Clinical chemistry and laboratory medicine*. 2020.
9. Lechien JR, Bartaire E, Bobin F, Hans S, Saussez S. The association between laryngopharyngeal reflux and COVID-19 is still not demonstrated. *Journal of medical virology*. 2020.
10. Leiva Sisniegues CE, Espeche WG, Salazar MR. Arterial hypertension and the risk of severity and mortality of COVID-19. *The European respiratory journal*. 2020;55(6).
11. Lippi G, de Oliveira MHS, Henry BM. Chronic liver disease is not associated with severity or mortality in Coronavirus disease 2019 (COVID-19): a pooled analysis. *European journal of gastroenterology & hepatology*. 2020.
12. Lippi G, Lavie CJ, Sanchis-Gomar F. Cardiac troponin I in patients with coronavirus disease 2019 (COVID-19): Evidence from a meta-analysis. *Progress in cardiovascular diseases*. 2020.
13. Lippi G, Mattiuzzi C, Sanchis-Gomar F, Henry BM. Clinical and demographic characteristics of patients dying from COVID-19 in Italy vs China. *Journal of medical virology*. 2020.

14. Liu X, Zhou H, Zhou Y, Wu X, Zhao Y, Lu Y, et al. Risk factors associated with disease severity and length of hospital stay in COVID-19 patients. *The Journal of infection*. 2020.
15. Marlais M, Wlodkowski T, Vivarelli M, Pape L, Tonshoff B, Schaefer F, et al. The severity of COVID-19 in children on immunosuppressive medication. *The Lancet Child & adolescent health*. 2020.
16. McQuaid CF, McCreesh N, Read JM, Sumner T, Houben RMGJ, White RG, et al. The potential impact of COVID-19-related disruption on tuberculosis burden. *The European respiratory journal*. 2020.
17. Mi B, Chen L, Panayi AC, Xiong Y, Liu G. Surgery in the COVID-19 pandemic: clinical characteristics and outcomes. *The British journal of surgery*. 2020.
18. Ong SWX, Young BE, Leo Y-S, Lye DC. Association of higher body mass index (BMI) with severe coronavirus disease 2019 (COVID-19) in younger patients. *Clinical infectious diseases : an official publication of the Infectious Diseases Society of America*. 2020.
19. Peng S, Huang L, Zhao B, Zhou S, Braithwaite I, Zhang N, et al. Clinical course of coronavirus disease 2019 in 11 patients after thoracic surgery and challenges in diagnosis. *The Journal of thoracic and cardiovascular surgery*. 2020.
20. Qi X, Liu Y, Wang J, Fallowfield JA, Wang J, Li X, et al. Clinical course and risk factors for mortality of COVID-19 patients with pre-existing cirrhosis: a multicentre cohort study. *Gut*. 2020.
21. Qiancheng X, Jian S, Lingling P, Lei H, Xiaogan J, Weihua L, et al. Coronavirus disease 2019 in pregnancy. *International journal of infectious diseases : IJID : official publication of the International Society for Infectious Diseases*. 2020;95:376-83.
22. Roncon L, Zuin M, Rigatelli G, Zuliani G. Diabetic patients with COVID-19 infection are at higher risk of ICU admission and poor short-term outcome. *Journal of clinical virology : the official publication of the Pan American Society for Clinical Virology*. 2020;127:104354.
23. Santoso A, Pranata R, Wibowo A, Al-Farabi MJ, Huang I, Antariksa B. Cardiac injury is associated with mortality and critically ill pneumonia in COVID-19: A meta-analysis. *The American journal of emergency medicine*. 2020.
24. Su M, Peng J, Wu M, Deng W, Yang Y, Peng YG. Two consecutive myocardial tissue insults for inpatients with COVID-19. *Critical care (London, England)*. 2020;24(1):259.
25. Tadolini M, Codecasa LR, Garcia-Garcia J-M, Blanc F-X, Borisov S, Alffenaar J-W, et al. Active tuberculosis, sequelae and COVID-19 co-infection: first cohort of 49 cases. *The European respiratory journal*. 2020.
26. Tan N-D, Qiu Y, Xing X-B, Ghosh S, Chen M-H, Mao R. Associations between Angiotensin Converting Enzyme Inhibitors and Angiotensin II Receptor Blocker Use, Gastrointestinal Symptoms, and Mortality among Patients with COVID-19. *Gastroenterology*. 2020.

27. Targher G, Mantovani A, Byrne CD, Wang X-B, Yan H-D, Sun Q-F, et al. Risk of severe illness from COVID-19 in patients with metabolic dysfunction-associated fatty liver disease and increased fibrosis scores. *Gut*. 2020.
28. Targher G, Mantovani A, Wang XB, Yan HD, Sun QF, Pan KH, et al. Patients with diabetes are at higher risk for severe illness from COVID-19. *Diabetes & metabolism*. 2020.
29. Tian S, Liu H, Liao M, Wu Y, Yang C, Cai Y, et al. Analysis of Mortality in Patients With COVID-19: Clinical and Laboratory Parameters. *Open forum infectious diseases*. 2020;7(5):ofaa152.
30. Wei X, Zeng W, Su J, Wan H, Yu X, Cao X, et al. Hypolipidemia is associated with the severity of COVID-19. *Journal of clinical lipidology*. 2020;14(3):297-304.
31. Xiong X-L, Wong KK-Y, Chi S-Q, Zhou A-F, Tang J-Q, Zhou L-S, et al. Comparative study of the clinical characteristics and epidemiological trend of 244 COVID-19 infected children with or without GI symptoms. *Gut*. 2020.
32. Yao Q, Wang P, Wang X, Qie G, Meng M, Tong X, et al. A retrospective study of risk factors for severe acute respiratory syndrome coronavirus 2 infections in hospitalized adult patients. *Polish archives of internal medicine*. 2020;130(5):390-9.
33. Zheng Z, Peng F, Xu B, Zhao J, Liu H, Peng J, et al. Risk factors of critical & mortal COVID-19 cases: A systematic literature review and meta-analysis. *The Journal of infection*. 2020.
34. Zhou Y-J, Zheng KI, Wang X-B, Yan H-D, Sun Q-F, Pan K-H, et al. Younger patients with MAFLD are at increased risk of severe COVID-19 illness: A multicenter preliminary analysis. *Journal of hepatology*. 2020.
35. Zuin M, Rigatelli G, Zuliani G, Rigatelli A, Mazza A, Roncon L. Arterial hypertension and risk of death in patients with COVID-19 infection: Systematic review and meta-analysis. *The Journal of infection*. 2020.
36. Screening and identification of peripheral blood biomarkers in patients with COVID-19 infection based on multiomics studies. *Chinese Clinical Trial Registry*. 2020.
37. Prognosis Investigation and Intervention Study on Patients with novel coronavirus pneumonia (COVID-19) in recovery period Based on Community Health Management. *Chinese Clinical Trial Registry*. 2020.
38. A medical records based analysis for the clinical characteristics of novel coronavirus pneumonia (COVID-19) in immunocompromised patients. *Chinese Clinical Trial Registry*. 2020.
39. Correlation analysis of blood eosinophil cell levels and clinical type category of novel coronavirus pneumonia (COVID-19): a medical records based retrospective study. *Chinese Clinical Trial Registry*. 2020.
40. A medical records based study for epidemic and clinical features of novel coronavirus pneumonia (COVID-19) in Ningbo First Hospital. *Chinese Clinical Trial Registry*. 2020.

41. Correlation of T lymphocytes level and clinical severity in novel coronavirus pneumonia (COVID-19) patients: a medical records based retrospective study. Chinese Clinical Trial Registry. 2020.
42. A medical records based retrospective study for analysis clinical characteristics and risk factors of death in patients with novel coronavirus pneumonia (COVID-19). Chinese Clinical Trial Registry. 2020.
43. A Medical Records Based Retrospective Study for Clinical Characteristics, Treatments and Prognosis of Patients with Novel Coronavirus Pneumonia (COVID-19) in WuHan. Chinese Clinical Trial Registry. 2020.
44. A medical records based study for clinical characteristics of 2019 novel coronavirus pneumonia (COVID-19) in Zhejiang province, China. Chinese Clinical Trial Registry. 2020.
45. Clinical and CT imaging Characteristics of novel coronavirus pneumonia (COVID-19): An Multicenter Cohort Study. Chinese Clinical Trial Registry. 2020.
46. A medical records based study for clinical characteristics of novel coronavirus pneumonia (COVID-19). Chinese Clinical Trial Registry. 2020.
47. A medical records based study for the value of Lymphocyte subsets in the diagnose and treatment of novel coronavirus pneumonia (COVID-19). Chinese Clinical Trial Registry. 2020.
48. A medical records based analysis of the Incidence and Risk Factors of Ventilator-associated Pneumonia in ARDS Patients with Novel Coronavirus Pneumonia (COVID-19). Chinese Clinical Trial Registry. 2020.
49. Correlation between virological negative conversion and clinical factors and prognosis in patients with novel coronavirus pneumonia (COVID-19). Chinese Clinical Trial Registry. 2020.
50. Clinical characteristics and prognosis of cancer patients with novel coronavirus pneumonia (COVID-19). Chinese Clinical Trial Registry. 2020.
51. Construction of Early Warning and Prediction System for Patients with Severe / Critical Novel Coronavirus Pneumonia (COVID-19). Chinese Clinical Trial Registry. 2020.
52. Study for the physical and mental health status of medical workers under the novel coronavirus pneumonia (COVID-19) epidemic. Chinese Clinical Trial Registry. 2020.
53. Construction of a Bio information platform for novel coronavirus pneumonia (COVID-19) patients follow-up in Anhui. Chinese Clinical Trial Registry. 2020.
54. A Medical Records Based Retrospective Study for Clinical Characteristics of severe Novel Coronavirus Pneumonia (COVID-19). Chinese Clinical Trial Registry. 2020.
55. Analysis of risk factors affecting prognosis of elderly patients infected with novel coronavirus pneumonia (COVID-19): a single-center retrospective observational study. Chinese Clinical Trial Registry. 2020.
56. Factors associated with death in patients with novel coronavirus pneumonia (COVID-19). Chinese Clinical Trial Registry. 2020.



57. To explore the pathogenesis and course prediction of novel coronavirus pneumonia (COVID-19) severe patients. Chinese Clinical Trial Registry. 2020.
58. A Medical Records Based analysis for Risk Factors for Outcomes After Respiratory Support in Patients with ARDS Due to Novel Coronavirus Pneumonia (COVID-19). Chinese Clinical Trial Registry. 2020.
59. A medical records based study for clinical characteristics and risk factors of novel coronavirus pneumonia (COVID-19). Chinese Clinical Trial Registry. 2020.
60. Novel Coronavirus Infected Disease (COVID-19) in children: epidemiology, clinical features and treatment outcome. Chinese Clinical Trial Registry. 2020.
61. A medical records based study for optimization and evaluation of the comprehensive diagnosis and treatment of novel coronavirus pneumonia (COVID-19) and the assessment of risk factors for severe pneumonia. Chinese Clinical Trial Registry. 2020.
62. A medical records based study for clinical features of novel coronavirus pneumonia (COVID-19) patients and risk factors of death. Chinese Clinical Trial Registry. 2020.
63. A medical records based analysis for risk factors for death in patients with Novel Coronavirus Pneumonia (COVID-19). Chinese Clinical Trial Registry. 2020.
64. Risk Factors for Outcomes of Novel Coronavirus Pneumonia (COVID-19). Chinese Clinical Trial Registry. 2020.
65. Analysis of the incidence and risk factors of ARDS in patients with Novel Coronavirus Pneumonia (COVID-19). Chinese Clinical Trial Registry. 2020.
66. The treatment status and risk factors related to prognosis of hospitalized patients with novel coronavirus pneumonia (COVID-19) in intensive care unit, Hebei, China: a descriptive study. Chinese Clinical Trial Registry. 2020.
67. Delineate the prevalence, risk factors, temporal distribution and epidemiological characteristics of hidden novel coronavirus (2019-nCoV) infection in the community. Chinese Clinical Trial Registry. 2020.
68. A correlation study between food intake and risk factors of PTSD after the COVID-19 of shift medical staff. Chinese Clinical Trial Registry. 2020.
69. Clinical characteristics and risk factors of novel coronavirus pneumonia (COVID-19) patients with chronic liver disease. Chinese Clinical Trial Registry. 2020.
70. Study for the risk factors of critically ill patients with novel coronavirus pneumonia (COVID-19). Chinese Clinical Trial Registry. 2020.
71. Bai X. A medical records based retrospective analysis of maternal and infant outcomes in Cesarean delivery in Hangzhou non pneumonia Hospital during pandemic of Novel coronavirus pneumonia(COVID-19). Chinese Clinical Trial Registry. 2020.
72. Bai Y, Yao L, Wei T, Tian F, Jin DY, Chen L, et al. Presumed Asymptomatic Carrier Transmission of COVID-19. *JAMA*. 2020;323(14):1406-7.

73. Beijing Children's H. Clinical Characteristics and Long-term Prognosis of 2019-nCoV Infection in Children. *clinicaltrials.gov*. 2020.
74. Bo W, Jiangtao L, Shihua F, Xiaocheng X, Lanyu L, Yueling M, et al. An effect assessment of Airborne particulate matter pollution on COVID-19: A multi-city Study in China. *medRxiv*. 2020.
75. Cai Q, Huang D, Ou P, Yu H, Zhu Z, Xia Z, et al. COVID-19 in a Designated Infectious Diseases Hospital Outside Hubei Province, China. *Allergy*. 2020.
76. Cao C, Li Y, Liu S, Fan H, Hao L. Epidemiological Features of 135 Patients with Coronavirus Disease (COVID-19) in Tianjin, China. *Disaster medicine and public health preparedness*. 2020:1-9.
77. Cao M, Zhang D, Wang Y, Lu Y, Zhu X, Li Y, et al. Clinical Features of Patients Infected with the 2019 Novel Coronavirus (COVID-19) in Shanghai, China. *medRxiv : the preprint server for health sciences*. 2020.
78. Cao W, Fang Z, Hou G, Han M, Xu X, Dong J, et al. The psychological impact of the COVID-19 epidemic on college students in China. *Psychiatry research*. 2020;287:112934.
79. Che Z, Jiaowei G, Quanjing C, Na D, Jingfeng L, Li H, et al. Clinical Characteristics of 34 Children with Coronavirus Disease-2019 in the West of China: a Multiple-center Case Series. *medRxiv*. 2020.
80. Chen H, Guo J, Wang C, Luo F, Yu X, Zhang W, et al. Clinical characteristics and intrauterine vertical transmission potential of COVID-19 infection in nine pregnant women: a retrospective review of medical records. *Lancet (London, England)*. 2020;395(10226):809-15.
81. Chen J, Qi T, Liu L, Ling Y, Qian Z, Li T, et al. Clinical progression of patients with COVID-19 in Shanghai, China. *The Journal of infection*. 2020;80(5):e1-e6.
82. Chen Ji, Hua F, Lin Z, Bin H, Muxin Z, Yong Z, et al. Retrospective Analysis of Clinical Features in 101 Death Cases with COVID-19. *medRxiv*. 2020.
83. Chen L, Li Q, Zheng D, Jiang H, Wei Y, Zou L, et al. Clinical Characteristics of Pregnant Women with Covid-19 in Wuhan, China. *The New England journal of medicine*. 2020.
84. Chen M, Fan Y, Wu X, Zhang L, Guo T, Deng K, et al. Clinical Characteristics And Risk Factors For Fatal Outcome in Patients With 2019-Coronavirus Infected Disease (COVID-19) in Wuhan, China. *SSRN*. 2020.
85. Chen N, Zhou M, Dong X, Qu J, Gong F, Han Y, et al. Epidemiological and clinical characteristics of 99 cases of 2019 novel coronavirus pneumonia in Wuhan, China: a descriptive study. *Lancet (London, England)*. 2020;395(10223):507-13.
86. Chen R, Liang W, Jiang M, Guan W, Zhan C, Wang T, et al. Risk factors of fatal outcome in hospitalized subjects with coronavirus disease 2019 from a nationwide analysis in China. *Chest*. 2020.
87. Chen S, Huang B, Luo DJ, Li X, Yang F, Zhao Y, et al. [Pregnant women with new coronavirus infection: a clinical characteristics and placental pathological analysis of three cases]. *Zhonghua bing li xue za zhi = Chinese journal of pathology*. 2020;49(0):E005.

88. Chen S, Liao E, Shao Y. Clinical analysis of pregnant women with 2019 novel coronavirus pneumonia. *Journal of medical virology*. 2020.
89. Chen T, Dai Z, Mo P, Li X, Ma Z, Song S, et al. Clinical characteristics and outcomes of older patients with coronavirus disease 2019 (COVID-19) in Wuhan, China (2019): a single-centered, retrospective study. *The journals of gerontology Series A, Biological sciences and medical sciences*. 2020.
90. Chen X, Zhao B, Qu Y, Chen Y, Xiong J, Feng Y, et al. Detectable serum SARS-CoV-2 viral load (RNAemia) is closely correlated with drastically elevated interleukin 6 (IL-6) level in critically ill COVID-19 patients. *Clinical infectious diseases : an official publication of the Infectious Diseases Society of America*. 2020.
91. Chen Y, Peng H, Wang L, Zhao Y, Zeng L, Gao H, et al. Infants Born to Mothers With a New Coronavirus (COVID-19). *Frontiers in pediatrics*. 2020;8:104.
92. Cheng Y, Luo R, Wang K, Zhang M, Wang Z, Dong L, et al. Kidney disease is associated with in-hospital death of patients with COVID-19. *Kidney International*. 2020;97(5):829-38.
93. Chenyun L, Yun-zhi Y, Xiao Ming Z, Xinying X, Qing-Li D, Wen-Wu Z. The prevalence and influencing factors for anxiety in medical workers fighting COVID-19 in China: A cross-sectional survey. *medRxiv*. 2020.
94. Chinese University of Hong K. Coronavirus Disease 2019 (COVID-19) Study of Hospitalized Patients in Hong Kong. *clinicaltrials.gov*. 2020.
95. Chongqing Medical U. Prognostic Factors of Patients With COVID-19. *clinicaltrials.gov*. 2020.
96. Chu J, Yang N, Wei Y, Yue H, Zhang F, Zhao J, et al. Clinical Characteristics of 54 medical staff with COVID-19: A retrospective study in a single center in Wuhan, China. *Journal of medical virology*. 2020;92(7):807-13.
97. Deng Y, Liu W, Liu K, Fang YY, Shang J, Zhou L, et al. Clinical characteristics of fatal and recovered cases of coronavirus disease 2019 (COVID-19) in Wuhan, China: a retrospective study. *Chinese medical journal*. 2020.
98. Dong XC, Li JM, Bai JY, Liu ZQ, Zhou PH, Gao L, et al. [Epidemiological characteristics of confirmed COVID-19 cases in Tianjin]. *Zhonghua liu xing bing xue za zhi = Zhonghua liuxingbingxue zazhi*. 2020;41(5):638-42.
99. Du RH, Liu LM, Yin W, Wang W, Guan LL, Yuan ML, et al. Hospitalization and Critical Care of 109 Decedents with COVID-19 Pneumonia in Wuhan, China. *Annals of the American Thoracic Society*. 2020.
100. Du Y, Tu L, Zhu P, Mu M, Wang R, Yang P, et al. Clinical Features of 85 Fatal Cases of COVID-19 from Wuhan: A Retrospective Observational Study. *American journal of respiratory and critical care medicine*. 2020;201(11):1372-9.

101. Fan C, Lei D, Fang C, Li C, Wang M, Liu Y, et al. Perinatal Transmission of COVID-19 Associated SARS-CoV-2: Should We Worry? *Clinical infectious diseases : an official publication of the Infectious Diseases Society of America*. 2020.
102. Fan Z, Deyan Y, Jing L, Peng G, Taibo C, Zhongwei C, et al. Myocardial injury is associated with in-hospital mortality of confirmed or suspected COVID-19 in Wuhan, China: A single center retrospective cohort study. *medRxiv*. 2020.
103. Feng K, Yun YX, Wang XF, Yang GD, Zheng YJ, Lin CM, et al. [Analysis of CT features of 15 children with 2019 novel coronavirus infection]. *Zhonghua er ke za zhi = Chinese journal of pediatrics*. 2020;58(4):275-8.
104. Feng Y, Ling Y, Bai T, Xie Y, Huang J, Li J, et al. COVID-19 with Different Severity: A Multi-center Study of Clinical Features. *American journal of respiratory and critical care medicine*. 2020;201(11):1380-8.
105. Francisco C, Nuno F, Barbara O. Estimation of risk factors for COVID-19 mortality - preliminary results. *medRxiv*. 2020:2020.02.24.20027268.
106. Gao L, Jiang D, Wen XS, Cheng XC, Sun M, He B, et al. Prognostic value of NT-proBNP in patients with severe COVID-19. *Respiratory research*. 2020;21(1):83.
107. Gong J, Ou J, Qiu X, Jie Y, Chen Y, Yuan L, et al. A Tool to Early Predict Severe Corona Virus Disease 2019 (COVID-19) : A Multicenter Study using the Risk Nomogram in Wuhan and Guangdong, China. *Clinical infectious diseases : an official publication of the Infectious Diseases Society of America*. 2020.
108. Guan WJ, Liang WH, Zhao Y, Liang HR, Chen ZS, Li YM, et al. Comorbidity and its impact on 1590 patients with Covid-19 in China: A Nationwide Analysis. *The European respiratory journal*. 2020;55(5).
109. Guan WJ, Ni ZY, Hu Y, Liang WH, Ou CQ, He JX, et al. Clinical Characteristics of Coronavirus Disease 2019 in China. *The New England journal of medicine*. 2020;382(18):1708-20.
110. Guang Y, Zihu T, Ling Z, Min Y, Lang P, Jinjin L, et al. Angiotensin II Receptor Blockers and Angiotensin-Converting Enzyme Inhibitors Usage is Associated with Improved Inflammatory Status and Clinical Outcomes in COVID-19 Patients With Hypertension. *medRxiv*. 2020.
111. Guo W, Li M, Dong Y, Zhou H, Zhang Z, Tian C, et al. Diabetes is a risk factor for the progression and prognosis of COVID-19. *Diabetes/metabolism research and reviews*. 2020:e3319.
112. Han H, Xie L, Liu R, Yang J, Liu F, Wu K, et al. Analysis of heart injury laboratory parameters in 273 COVID-19 patients in one hospital in Wuhan, China. *Journal of medical virology*. 2020;92(7):819-23.
113. Han M, Ma K, Wang X, Yan W, Wang H, You J, et al. Higher Fasting Plasma Glucose Reduced the Survival Rate of 306 Hospitalized Patients with COVID-19 in Wuhan, China. *SSRN*. 2020.

114. Hantoushzadeh S, Shamshirsaz AA, Aleyasin A, Seferovic MD, Aski SK, Arian SE, et al. Maternal Death Due to COVID-19 Disease. *American journal of obstetrics and gynecology*. 2020.
115. Hu H, Yao N, Qiu Y. Comparing rapid scoring systems in mortality prediction of critical ill patients with novel coronavirus disease. *Academic emergency medicine : official journal of the Society for Academic Emergency Medicine*. 2020.
116. Hu L, Chen S, Fu Y, Gao Z, Long H, Wang JM, et al. Risk Factors Associated with Clinical Outcomes in 323 COVID-19 Hospitalized Patients in Wuhan, China. *Clinical infectious diseases : an official publication of the Infectious Diseases Society of America*. 2020.
117. Hu Z, Song C, Xu C, Jin G, Chen Y, Xu X, et al. Clinical characteristics of 24 asymptomatic infections with COVID-19 screened among close contacts in Nanjing, China. *Science China Life sciences*. 2020;63(5):706-11.
118. Huadong Y, Ana MV, Amrita V, Shanbo W, Lili L, Shiqing Y, et al. Role of Drugs Affecting the Renin-Angiotensin-Aldosterone System on Susceptibility and Severity of COVID-19: A Large Case-Control Study from Zhejiang Province, China. *medRxiv*. 2020.
119. Huang C, Wang Y, Li X, Ren L, Zhao J, Hu Y, et al. Clinical features of patients infected with 2019 novel coronavirus in Wuhan, China. *Lancet (London, England)*. 2020;395(10223):497-506.
120. Huang H, Shuijiang C, Yueping L, Youxia L, Yinqiang F, Linghua L, et al. Prognostic factors for COVID-19 pneumonia progression to severe symptom based on the earlier clinical features: a retrospective analysis. *medRxiv*. 2020.
121. Huang Y, Tu M, Wang S, Chen S, Zhou W, Chen D, et al. Clinical characteristics of laboratory confirmed positive cases of SARS-CoV-2 infection in Wuhan, China: A retrospective single center analysis. *Travel medicine and infectious disease*. 2020:101606.
122. Hui H, Yingqian Z, Xin Y, Xi W, Bingxi H, Li L, et al. Clinical and radiographic features of cardiac injury in patients with 2019 novel coronavirus pneumonia. *medRxiv*. 2020.
123. Jia-Kui S. Acute gastrointestinal injury in critically ill patients with coronavirus disease 2019 in Wuhan, China. *medRxiv*. 2020.
124. Jianfeng X, Daniel H, Hui C, Simon TA, Shusheng L, Guozheng W, et al. Development and external validation of a prognostic multivariable model on admission for hospitalized patients with COVID-19. *medRxiv*. 2020:2020.03.28.20045997.
125. Jiatao L, Shufang H, Rong F, Zhihong L, Xueru Y, Qiongya W, et al. ACP risk grade: a simple mortality index for patients with confirmed or suspected severe acute respiratory syndrome coronavirus 2 disease (COVID-19) during the early stage of outbreak in Wuhan, China. *medRxiv*. 2020:2020.02.20.20025510.
126. Jie L, Liu O, Pi G, Hai sheng W, Peng F, Yu liang C, et al. Epidemiological, Clinical Characteristics and Outcome of Medical Staff Infected with COVID-19 in Wuhan, China: A Retrospective Case Series Analysis. *medRxiv*. 2020:2020.03.09.20033118.

127. Jie L, Shilin L, Yurui C, Qin L, Xue L, Zhaoping Z, et al. Epidemiological and Clinical Characteristics of 17 Hospitalized Patients with 2019 Novel Coronavirus Infections Outside Wuhan, China. *medRxiv*. 2020:2020.02.11.20022053.
128. Jin XH, Zheng KI, Pan KH, Xie YP, Zheng MH. COVID-19 in a patient with chronic lymphocytic leukaemia. *The Lancet Haematology*. 2020;7(4):e351-e2.
129. Jin-Kui Y, Jian-Min J, Shi L, Peng B, Wei H, Fei W, et al. Blood glucose is a representative of the clustered indicators of multi-organ injury for predicting mortality of COVID-19 in Wuhan, China. *medRxiv*. 2020.
130. Jing G, Hui D, Song Qing X, Yi Zhao H, Dingkun W, Yan Z, et al. Correlation Analysis Between Disease Severity and Inflammation-related Parameters in Patients with COVID-19 Pneumonia. *medRxiv*. 2020.
131. Kuang Y, Zhang H, Zhou R. Epidemiological and Clinical Characteristics of 944 Cases of 2019 Novel Coronavirus Infection of Non-COVID-19 Exporting City, Zhejiang, China. SSRN. 2020.
132. Ladan G, Mina Akbari R, Robert B, Abolghasem A, Team MC-R, Benyamin H. Demographic and Clinical Characteristics of the Severe Covid-19 Infections: First Report from Mashhad University of Medical Sciences, Iran. *medRxiv*. 2020.
133. Lee N-Y, Li C-W, Tsai H-P, Chen P-L, Syue L-S, Li M-C, et al. A case of COVID-19 and pneumonia returning from Macau in Taiwan: Clinical course and anti-SARS-CoV-2 IgG dynamic. *Journal of microbiology, immunology, and infection = Wei mian yu gan ran za zhi*. 2020;53(3):485-7.
134. Lei D, Li C, Fang C, et al. Clinical characteristics of pregnancy with the 2019 novel coronavirus disease (COVID-19) infection. *Chinese Journal of Perinatal Medicine*. 2020;23(3):157-63.
135. Lei Z, Cao H, Jie Y, Huang Z, Guo X, Chen J, et al. A cross-sectional comparison of epidemiological and clinical features of patients with coronavirus disease (COVID-19) in Wuhan and outside Wuhan, China. *Travel medicine and infectious disease*. 2020:101664.
136. Li H, Xiang X, Ren H, Xu L, Zhao L, Chen X, et al. SAA is a biomarker to distinguish the severity and prognosis of Coronavirus Disease 2019 (COVID-19). *The Journal of infection*. 2020;80(6):646-55.
137. Li J, Wang X, Chen J, Zhang H, Deng A. Association of Renin-Angiotensin System Inhibitors With Severity or Risk of Death in Patients With Hypertension Hospitalized for Coronavirus Disease 2019 (COVID-19) Infection in Wuhan, China. *JAMA cardiology*. 2020.
138. Li N, Han L, Peng M, Lv Y, Ouyang Y, Liu K, et al. Maternal and neonatal outcomes of pregnant women with COVID-19 pneumonia: a case-control study. *Clinical infectious diseases : an official publication of the Infectious Diseases Society of America*. 2020.
139. Li W, Cui H, Li K, Fang Y, Li S. Chest computed tomography in children with COVID-19 respiratory infection. *Pediatric radiology*. 2020;50(6):796-9.

140. Li X, Wu Q, Lv B. Can Search Query Forecast successfully in China's 2019-nCov pneumonia? medRxiv. 2020.
141. Li X, Xu S, Yu M, Wang K, Tao Y, Zhou Y, et al. Risk factors for severity and mortality in adult COVID-19 inpatients in Wuhan. *The Journal of allergy and clinical immunology*. 2020.
142. Li X, Zeng W, Li X, Chen H, Shi L, Li X, et al. CT imaging changes of corona virus disease 2019(COVID-19): a multi-center study in Southwest China. *Journal of translational medicine*. 2020;18(1):154.
143. Liang W, Guan W, Chen R, Wang W, Li J, Xu K, et al. Cancer patients in SARS-CoV-2 infection: a nationwide analysis in China. *The Lancet Oncology*. 2020;21(3):335-7.
144. Liang WH, Guan WJ, Li CC, Li YM, Liang HR, Zhao Y, et al. Clinical characteristics and outcomes of hospitalised patients with COVID-19 treated in Hubei (epicenter) and outside Hubei (non-epicenter): A Nationwide Analysis of China. *The European respiratory journal*. 2020.
145. Liao J, He X, Gong Q, Yang L, Zhou C, Li J. Analysis of vaginal delivery outcomes among pregnant women in Wuhan, China during the COVID-19 pandemic. *International journal of gynaecology and obstetrics: the official organ of the International Federation of Gynaecology and Obstetrics*. 2020;150(1):53-7.
146. Liu CY, Huang LJ, Lai CH, Chen HP, Chen TL, Fung CP, et al. Clinical characteristics, management and prognostic factors in patients with probable severe acute respiratory syndrome (SARS) in a SARS center in Taiwan. *Journal of the Chinese Medical Association : JCMA*. 2005;68(3):110-7.
147. Liu H, Liu F, Li J, Zhang T, Wang D, Lan W. Clinical and CT Imaging Features of the COVID-19 Pneumonia: Focus on Pregnant Women and Children. *The Journal of infection*. 2020;80(5):e7-e13.
148. Liu R, Han H, Liu F, Lv Z, Wu K, Liu Y, et al. Positive rate of RT-PCR detection of SARS-CoV-2 infection in 4880 cases from one hospital in Wuhan, China, from Jan to Feb 2020. *Clinica chimica acta; international journal of clinical chemistry*. 2020;505:172-5.
149. Liu S, Luo H, Wang Y, Wang D, Ju S, Yang Y. Characteristics and Associations with Severity in COVID-19 Patients: A Multicentre Cohort Study from Jiangsu Province, China. SSRN. 2020.
150. Liu T, Hu J, Xiao J, He G, Kang M, Rong Z, et al. Time-varying transmission dynamics of Novel Coronavirus Pneumonia in China. bioRxiv. 2020.
151. Liu W, Tao ZW, Lei W, Ming-Li Y, Kui L, Ling Z, et al. Analysis of factors associated with disease outcomes in hospitalized patients with 2019 novel coronavirus disease. *Chinese medical journal*. 2020;133(9):1032-8.
152. Liu W, Wang Q, Zhang Q, Chen L, Chen J, Zhang B, et al. Coronavirus disease 2019 (COVID-19) during pregnancy: a case series. Preprints. 2020.
153. Liu W, Zhang Q, Chen J, Xiang R, Song H, Shu S, et al. Detection of Covid-19 in Children in Early January 2020 in Wuhan, China. *The New England journal of medicine*. 2020;382(14):1370-1.

154. Liu Y, Du X, Chen J, Jin Y, Peng L, Wang HHX, et al. Neutrophil-to-lymphocyte ratio as an independent risk factor for mortality in hospitalized patients with COVID-19. *The Journal of infection*. 2020.
155. Liu Y, Yang Y, Zhang C, Huang F, Wang F, Yuan J, et al. Clinical and biochemical indexes from 2019-nCoV infected patients linked to viral loads and lung injury. *Science China Life sciences*. 2020;63(3):364-74.
156. Lopes RD, Macedo AVS, de Barros ESPGM, Moll-Bernardes RJ, Feldman A, D'Andréa Saba Arruda G, et al. Continuing versus suspending angiotensin-converting enzyme inhibitors and angiotensin receptor blockers: Impact on adverse outcomes in hospitalized patients with severe acute respiratory syndrome coronavirus 2 (SARS-CoV-2). *American heart journal*. 2020;226:49-59.
157. Lu L, Xiong W, Liu D, Liu J, Yang D, Li N, et al. New-onset acute symptomatic seizure and risk factors in Corona Virus Disease 2019: A Retrospective Multicenter Study. *Epilepsia*. 2020.
158. Luo XM, Zhou W, Xia H, Yang W, Yan X, Wang B. Characteristics of SARS-CoV-2 Infected Patients with Clinical Outcome During Epidemic Ongoing Outbreak in Wuhan, China. *SSRN*. 2020.
159. Meng H, Xiong R, He R, Lin W, Hao B, Zhang L, et al. CT imaging and clinical course of asymptomatic cases with COVID-19 pneumonia at admission in Wuhan, China. *The Journal of infection*. 2020.
160. Mingzhu Y, Lijuan Z, Guangtong D, Chaofei H, Minxue S, Hongyin S, et al. Severe Acute Respiratory Syndrome Coronavirus 2 (SARS-CoV-2) Infection During Pregnancy In China: A Retrospective Cohort Study. *medRxiv*. 2020.
161. Mo P, Xing Y, Xiao Y, Deng L, Zhao Q, Wang H, et al. Clinical characteristics of refractory COVID-19 pneumonia in Wuhan, China. *Clinical infectious diseases : an official publication of the Infectious Diseases Society of America*. 2020(ciaa270).
162. Muhammad O, Takasar H, Mureed H, Aziz Ullah A, Dumitru B. Estimation of Transmission Potential and Severity of COVID-19 in Romania and Pakistan. *medRxiv*. 2020.
163. Nikpouraghdam M, Jalali Farahani A, Alishiri G, Heydari S, Ebrahimnia M, Samadinia H, et al. Epidemiological characteristics of coronavirus disease 2019 (COVID-19) patients in IRAN: A single center study. *Journal of clinical virology : the official publication of the Pan American Society for Clinical Virology*. 2020;127:104378.
164. Novel Coronavirus Pneumonia Emergency Response Epidemiology T. [The epidemiological characteristics of an outbreak of 2019 novel coronavirus diseases (COVID-19) in China]. *Zhonghua liu xing bing xue za zhi = Zhonghua liuxingbingxue zazhi*. 2020;41(2):145-51.
165. Pan Y, Guan H, Zhou S, Wang Y, Li Q, Zhu T, et al. Initial CT findings and temporal changes in patients with the novel coronavirus pneumonia (2019-nCoV): a study of 63 patients in Wuhan, China. *European radiology*. 2020;30(6):3306-9.



166. Peng YD, Meng K, Guan HQ, Leng L, Zhu RR, Wang BY, et al. [Clinical characteristics and outcomes of 112 cardiovascular disease patients infected by 2019-nCoV]. *Zhonghua xin xue guan bing za zhi*. 2020;48(0):E004.
167. Qian GQ, Yang NB, Ding F, Ma AHY, Wang ZY, Shen YF, et al. Epidemiologic and Clinical Characteristics of 91 Hospitalized Patients with COVID-19 in Zhejiang, China: A retrospective, multi-centre case series. *QJM : monthly journal of the Association of Physicians*. 2020.
168. Qiao S, Kailiang Z, Jia Y, Jiarui F, Kaiping Z, Xiaoyi Z, et al. Clinical characteristics of 101 non-surviving hospitalized patients with COVID-19: A single center, retrospective study. *medRxiv*. 2020.
169. Qin C, Zhou L, Hu Z, Zhang S, Yang S, Tao Y, et al. Dysregulation of immune response in patients with COVID-19 in Wuhan, China. *Clinical infectious diseases : an official publication of the Infectious Diseases Society of America*. 2020(ciaa248).
170. Qiu H, Wu J, Hong L, Luo Y, Song Q, Chen D. Clinical and epidemiological features of 36 children with coronavirus disease 2019 (COVID-19) in Zhejiang, China: an observational cohort study. *The Lancet Infectious diseases*. 2020;20(6):689-96.
171. Ran L, Chen X, Wang Y, Wu W, Zhang L, Tan X. Risk Factors of Healthcare Workers with Corona Virus Disease 2019: A Retrospective Cohort Study in a Designated Hospital of Wuhan in China. *Clinical infectious diseases : an official publication of the Infectious Diseases Society of America*. 2020.
172. Ren LL, Wang YM, Wu ZQ, Xiang ZC, Guo L, Xu T, et al. Identification of a novel coronavirus causing severe pneumonia in human: a descriptive study. *Chinese medical journal*. 2020;133(9):1015-24.
173. Ruan Q, Yang K, Wang W, Jiang L, Song J. Clinical predictors of mortality due to COVID-19 based on an analysis of data of 150 patients from Wuhan, China. *Intensive care medicine*. 2020;46(5):846-8.
174. Rui N, Shao-shuai W, Qiong Y, Cui-fang F, Yu-ling L, Wen-cong H, et al. Clinical features and the maternal and neonatal outcomes of pregnant women with coronavirus disease 2019. *medRxiv*. 2020.
175. Shang J, Du R, Lu Q, Wu J, Xu S, Ke Z, et al. The Treatment and Outcomes of Patients with COVID-19 in Hubei, China: A Multi-Centered, Retrospective, Observational Study. *SSRN*. 2020.
176. Shen Q, Guo W, Guo T, Li J, He W, Ni S, et al. Novel coronavirus infection in children outside of Wuhan, China. *Pediatric pulmonology*. 2020;55(6):1424-9.
177. Shen X, Lin F, Jun F, Hui-Xian X, Ying X, Zhu-Xia T, et al. Acute kidney injury at early stage as a negative prognostic indicator of patients with COVID-19: a hospital-based retrospective analysis. *medRxiv*. 2020.
178. Shi H, Han X, Jiang N, Cao Y, Alwalid O, Gu J, et al. Radiological findings from 81 patients with COVID-19 pneumonia in Wuhan, China: a descriptive study. *The Lancet Infectious diseases*. 2020;20(4):425-34.

179. Shi S, Qin M, Shen B, Cai Y, Liu T, Yang F, et al. Association of Cardiac Injury With Mortality in Hospitalized Patients With COVID-19 in Wuhan, China. *JAMA cardiology*. 2020.
180. Su L, Ma X, Yu H, Zhang Z, Bian P, Han Y, et al. The different clinical characteristics of corona virus disease cases between children and their families in China - the character of children with COVID-19. *Emerging microbes & infections*. 2020;9(1):707-13.
181. Sun F KHWS, et al. Medication Patterns and Disease Progression Among 165 Patients with Coronavirus Disease 2019 (COVID-19) in Wuhan, China: A Single-Centered, Retrospective, Observational Study. 2020.
182. Sun X, Wang J, Liu Z, Zhou X, Yan Xw, Li T. Characteristics of Patients with COVID-19 Pneumonia Admitted to the Intensive Care Unit and Predictors of Mortality in Wuhan, China: A Single-Centered Retrospective Cohort Study. *SSRN*. 2020.
183. Sun Y, Koh V, Marimuthu K, Ng OT, Young B, Vasoo S, et al. Epidemiological and Clinical Predictors of COVID-19. *Clinical infectious diseases : an official publication of the Infectious Diseases Society of America*. 2020.
184. Suochen T, Zhenqin C, Yunxia W, Min W, Wenming Z, Guijie Z, et al. Clinical characteristics and reasons of different duration from onset to release from quarantine for patients with COVID-19 Outside Hubei province, China. *medRxiv*. 2020.
185. Taghizadieh A, Mikaeili H, Ahmadi M, Valizadeh H. Acute kidney injury in pregnant women following SARS-CoV-2 infection: A case report from Iran. *Respiratory medicine case reports*. 2020;30:101090.
186. Tian S, Hu N, Lou J, Chen K, Kang X, Xiang Z, et al. Characteristics of COVID-19 infection in Beijing. *The Journal of infection*. 2020;80(4):401-6.
187. Ting D, Jinjin Z, Tian W, Pengfei C, Zhe C, Jingjing J, et al. A Multi-hospital Study in Wuhan, China : Protective Effects of Non-menopause and Female Hormones on SARS-CoV-2 infection. *medRxiv*. 2020.
188. Tong ZD, Tang A, Li KF, Li P, Wang HL, Yi JP, et al. Potential Presymptomatic Transmission of SARS-CoV-2, Zhejiang Province, China, 2020. *Emerging infectious diseases*. 2020;26(5):1052-4.
189. University of M-C. COVID-19 in Patients With HIV. *clinicaltrials.gov*. 2020.
190. Wang D, Hu B, Hu C, Zhu F, Liu X, Zhang J, et al. Clinical Characteristics of 138 Hospitalized Patients With 2019 Novel Coronavirus-Infected Pneumonia in Wuhan, China. *JAMA*. 2020;323(11):1061-9.
191. Wang D, Ju XL, Xie F, Lu Y, Li FY, Huang HH, et al. [Clinical analysis of 31 cases of 2019 novel coronavirus infection in children from six provinces (autonomous region) of northern China]. *Zhonghua er ke za zhi = Chinese journal of pediatrics*. 2020;58(4):E011.
192. Wang K, Zuo PY, Liu Y, Zhang M, Zhao X, Xie S, et al. Clinical and Laboratory Predictors of In-Hospital Mortality in 305 Patients with COVID-19: A Cohort Study in Wuhan, China. *SSRN*. 2020.

193. Wang L, He W, Yu X, Hu D, Bao M, Liu H, et al. Coronavirus Disease 2019 in elderly patients: characteristics and prognostic factors based on 4-week follow-up. *The Journal of infection*. 2020;80(6):639-45.
194. Wang L, Li X, Chen H, Yan S, Li D, Li Y, et al. Coronavirus Disease 19 Infection Does Not Result in Acute Kidney Injury: An Analysis of 116 Hospitalized Patients from Wuhan, China. *American journal of nephrology*. 2020;51(5):1-6.
195. Wang R, Pan M, Zhang X, Fan X, Han M, Zhao F, et al. Epidemiological and clinical features of 125 Hospitalized Patients with COVID-19 in Fuyang, Anhui, China. *International journal of infectious diseases : IJID : official publication of the International Society for Infectious Diseases*. 2020;95:421-8.
196. Wang S, Guo L, Chen L, Liu W, Cao Y, Zhang J, et al. A case report of neonatal COVID-19 infection in China. *Clinical infectious diseases : an official publication of the Infectious Diseases Society of America*. 2020.
197. Wang Y, Liu Y, Liu L, Wang X, Luo N, Ling L. Clinical outcome of 55 asymptomatic cases at the time of hospital admission infected with SARS-Coronavirus-2 in Shenzhen, China. *The Journal of infectious diseases*. 2020;221(11):1770-4.
198. Wang Z, Yang B, Li Q, Wen L, Zhang R. Clinical Features of 69 Cases with Coronavirus Disease 2019 in Wuhan, China. *Clinical infectious diseases : an official publication of the Infectious Diseases Society of America*. 2020(ciaa272).
199. Wei YY, Wang RR, Zhang DW, Tu YH, Chen CS, Ji S, et al. Risk factors for severe COVID-19: evidence from 167 hospitalized patients in Anhui, China. *The Journal of infection*. 2020.
200. Wen R, Sun Y, Xing Q-S. A patient with SARS-CoV-2 infection during pregnancy in Qingdao, China. *Journal of Microbiology, Immunology and Infection*. 2020.
201. Wu C, Chen X, Cai Y, Xia J, Zhou X, Xu S, et al. Risk Factors Associated With Acute Respiratory Distress Syndrome and Death in Patients With Coronavirus Disease 2019 Pneumonia in Wuhan, China. *JAMA internal medicine*. 2020.
202. Wu JT, Leung K, Bushman M, Kishore N, Niehus R, de Salazar PM, et al. Estimating clinical severity of COVID-19 from the transmission dynamics in Wuhan, China. *Nature medicine*. 2020;26(4):506-10.
203. Wu W, Wang J, Liu P, Chen W, Yin S, Jiang S, et al. A hospital outbreak of severe acute respiratory syndrome in Guangzhou, China. *Chinese medical journal*. 2003;116(6):811-8.
204. Xia W, Shao J, Guo Y, Peng X, Li Z, Hu D. Clinical and CT features in pediatric patients with COVID-19 infection: Different points from adults. *Pediatric pulmonology*. 2020;55(5):1169-74.
205. Xianfei Z, Hongyan F, Dongxue L, Fang H, Xi M, Zhuo L, et al. Association between ABO blood groups and clinical outcome of coronavirus disease 2019: Evidence from two cohorts. *medRxiv*. 2020.

206. Xiao K, Shui L, Pang X, et al. The clinical features of the 143 patients with COVID-19 in North-East of Chongqing. *第三军医大学学报 (Journal of Third Military Medical University)*. 2020;6:549-54.
207. Xiufeng J, Jianxin T, Hui W, Yixin W, Wei Z, Min Z, et al. Clinical features and management of severe COVID-19: A retrospective study in Wuxi, Jiangsu Province, China. *medRxiv*. 2020.
208. Xu C, Fang Z, Yanhua Q, Shuizi D, Danhui Y, Cheng L, et al. Epidemiological and clinical features of 291 cases with coronavirus disease 2019 in areas adjacent to Hubei, China: a double-center observational study. *medRxiv*. 2020:2020.03.03.20030353.
209. Xu H, Yan C, Fu Q, Xiao K, Yu Y, Han D, et al. Possible environmental effects on the spread of COVID-19 in China. *The Science of the total environment*. 2020;731:139211.
210. Xun L, Luwen W, Shaonan Y, Fan Y, Longkui X, Jiling Z, et al. Clinical characteristics of 25 death cases infected with COVID-19 pneumonia: a retrospective review of medical records in a single medical center, Wuhan, China. *medRxiv*. 2020.
211. Yafei W, Ying Z, Zhen Y, Dongping X, Shuang G. Clinical Characteristics of Patients with Severe Pneumonia Caused by the 2019 Novel Coronavirus in Wuhan, China. *medRxiv*. 2020.
212. Yang W, Cao Q, Qin L, Wang X, Cheng Z, Pan A, et al. Clinical characteristics and imaging manifestations of the 2019 novel coronavirus disease (COVID-19): A multi-center study in Wenzhou city, Zhejiang, China. *The Journal of infection*. 2020;80(4):388-93.
213. Yang X, Yu Y, Xu J, Shu H, Xia J, Liu H, et al. Clinical course and outcomes of critically ill patients with SARS-CoV-2 pneumonia in Wuhan, China: a single-centered, retrospective, observational study. *The Lancet Respiratory medicine*. 2020;8(5):475-81.
214. Yao Q, Wang P, Wang X, Qie G, Meng M, Tong X, et al. Retrospective study of risk factors for severe SARS-Cov-2 infections in hospitalized adult patients. *Polish archives of internal medicine*. 2020;130(5):390-9.
215. Yao T, Gao Y, Cui Q, Shen J, Peng B, Chen Y, et al. Clinical Characteristics of 55 Cases of Deaths with COVID-19 Pneumonia in Wuhan, China: Retrospective Case Series. *SSRN*. 2020.
216. Yi H, Haidong Z, Sucheng M, Wei W, Chaoyuan J, Yuan X, et al. Lactate dehydrogenase, a Risk Factor of Severe COVID-19 Patients. *medRxiv*. 2020.
217. Yin Y, Zhou S, Zhang X, Li Z, Liu X, Jiang C. Critically Ill Patients with COVID-19 in China: A Multicenter Retrospective Observational Study. *SSRN*. 2020.
218. Yu N, Li W, Kang Q, Xiong Z, Wang S, Lin X, et al. Clinical features and obstetric and neonatal outcomes of pregnant patients with COVID-19 in Wuhan, China: a retrospective, single-centre, descriptive study. *The Lancet Infectious diseases*. 2020;20(5):559-64.
219. Yuan M, Yin W, Tao Z, Tan W, Hu Y. Association of radiologic findings with mortality of patients infected with 2019 novel coronavirus in Wuhan, China. *PloS one*. 2020;15(3):e0230548.

220. Zamaniyan M, Ebadi A, Aghajanoor Mir S, Rahmani Z, Haghshenas M, Azizi S. Preterm delivery in pregnant woman with critical COVID-19 pneumonia and vertical transmission. *Prenatal diagnosis*. 2020.
221. Zareie B, Roshani A, Mansournia MA, Rasouli MA, Moradi G. A Model for COVID-19 Prediction in Iran Based on China Parameters. *Archives of Iranian medicine*. 2020;23(4):244-8.
222. Zeng L, Xia S, Yuan W, Yan K, Xiao F, Shao J, et al. Neonatal Early-Onset Infection With SARS-CoV-2 in 33 Neonates Born to Mothers With COVID-19 in Wuhan, China. *JAMA pediatrics*. 2020.
223. Zhang G, Zhang J, Wang B, Zhu X, Wang Q, Qiu S. Analysis of clinical characteristics and laboratory findings of 95 cases of 2019 novel coronavirus pneumonia in Wuhan, China: a retrospective analysis. *Respiratory research*. 2020;21(1):74.
224. Zhang H-n. A Medical Records Based Study for the Correlation between Angiotensin II Type 1 Receptor Blockers (ARBs) and the Progression and Outcome of Novel Coronavirus Pneumonia (COVID-19). *Chinese Clinical Trial Registry*. 2020.
225. Zhang J, Wang X, Jia X, Li J, Hu K, Chen G, et al. Risk factors for disease severity, unimprovement, and mortality of COVID-19 patients in Wuhan, China. *Clinical microbiology and infection : the official publication of the European Society of Clinical Microbiology and Infectious Diseases*. 2020;26(6):767-72.
226. Zhang JJ, Dong X, Cao YY, Yuan YD, Yang YB, Yan YQ, et al. Clinical characteristics of 140 patients infected with SARS-CoV-2 in Wuhan, China. *Allergy*. 2020.
227. Zhang L, Dong L, Ming L, Wei M, Li J, Hu R, et al. Severe Acute Respiratory Syndrome Coronavirus 2(SARS-CoV-2) infection during late pregnancy: A Report of 18 patients from Wuhan, China. *Research Square*. 2020.
228. Zhang L, Zhu F, Xie L, Wang C, Wang J, Chen R, et al. Clinical characteristics of COVID-19-infected cancer patients: A retrospective case study in three hospitals within Wuhan, China. *Annals of oncology : official journal of the European Society for Medical Oncology*. 2020.
229. Zhang MQ, Wang XH, Chen YL, Zhao KL, Cai YQ, An CL, et al. [Clinical features of 2019 novel coronavirus pneumonia in the early stage from a fever clinic in Beijing]. *Zhonghua jie he he hu xi za zhi = Zhonghua jiehe he huxi zazhi = Chinese journal of tuberculosis and respiratory diseases*. 2020;43(0):E013.
230. Zhang S, Guo M, Duan L, Wu F, Wang Z, Xu J. Short Term Outcomes and Risk Factors for Mortality in Patients with COVID-19 in Wuhan, China: A Retrospective Study. *SSRN*. 2020.
231. Zhang WR, Wang K, Yin L, Zhao WF, Xue Q, Peng M, et al. Mental Health and Psychosocial Problems of Medical Health Workers during the COVID-19 Epidemic in China. *Psychotherapy and psychosomatics*. 2020:1-9.
232. Zhang Y, Zheng L, Liu L, Zhao M, Xiao J, Zhao Q. Liver impairment in COVID-19 patients: a retrospective analysis of 115 cases from a single center in Wuhan city, China. *Liver international : official journal of the International Association for the Study of the Liver*. 2020.

233. Zhang ZJ, Yu XJ, Fu T, Liu Y, Jiang Y, Yang BX, et al. Novel Coronavirus Infection in Newborn Babies Under 28 Days in China. *The European respiratory journal*. 2020.
234. Zheng F, Liao C, Fan QH, Chen HB, Zhao XG, Xie ZG, et al. Clinical Characteristics of Children with Coronavirus Disease 2019 in Hubei, China. *Current medical science*. 2020;40(2):275-80.
235. Zhou F, Yu T, Du R, Fan G, Liu Y, Liu Z, et al. Clinical course and risk factors for mortality of adult inpatients with COVID-19 in Wuhan, China: a retrospective cohort study. *Lancet (London, England)*. 2020;395(10229):1054-62.
236. Zhou Y, Zhang Z, Tian J, Xiong S. Risk factors associated with disease progression in a cohort of patients infected with the 2019 novel coronavirus. *Annals of palliative medicine*. 2020;9(2):428-36.
237. Zhu H, Wang L, Fang C, Peng S, Zhang L, Chang G, et al. Clinical analysis of 10 neonates born to mothers with 2019-nCoV pneumonia. *Translational pediatrics*. 2020;9(1):51-60.
238. Zhu Q, Zhao S, Lai X, Zhao J, Guo D, Gan L. Dose-Response Association between Risk Factors and Incidence of COVID-19 in 325 Hospitalized Patients: A Multicenter Retrospective Cohort Study. *SSRN*. 2020.
239. Zhu W, Xie K, Lu H, Xu L, Zhou S, Fang S. Initial clinical features of suspected Coronavirus Disease 2019 in two emergency departments outside of Hubei, China. *Journal of medical virology*. 2020.
240. Zhu X, Yuan W, Huang K, Wang Q, Yao S, Lu W, et al. Clinical Features and Short-Term Outcomes of 114 Elderly Patients with COVID-19 in Wuhan, China: A Single-Center, Retrospective, Observational Study. *SSRN*. 2020.

#### **Excluded – duplicate at full text (n=3)**

1. Cummings MJ, Baldwin MR, Abrams D, Jacobson SD, Meyer BJ, Balough EM, et al. Epidemiology, clinical course, and outcomes of critically ill adults with COVID-19 in New York City: a prospective cohort study. *Lancet (London, England)*. 2020;395(10239):1763-70.
2. Simonnet A, Chetboun M, Poissy J, Raverdy V, Noulette J, Duhamel A, et al. High Prevalence of Obesity in Severe Acute Respiratory Syndrome Coronavirus-2 (SARS-CoV-2) Requiring Invasive Mechanical Ventilation. *Obesity (Silver Spring, Md)*. 2020.
3. Temgoua MN, Kuate LM, Ngatchou W, Sibetcheu A, Toupendi ZN, Belobo G, et al. Thromboembolic risks in patients with COVID-19: major concern to consider in our management. *The Pan African medical journal*. 2020;35(Suppl 2):10.

#### **Excluded – not English or French (n=5)**

1. Alcocer-Gamba MA, Gutierrez-Fajardo P, Sosa-Caballero A, Cabrera-Rayó A, Faradji-Hazan RN, Padilla-Padilla FG, et al. Recommendations for the care of patients with diabetes

mellitus with risk factors or established cardiovascular disease and SARS-CoV-2 mellitus con factores de riesgo o enfermedad cardiovascular establecida y SARS-CoV-2. Recomendaciones para la atención de pacientes con diabetes. 2020;90(Supl):77-83.

2. Devulapalli CS. COVID-19 - a mild disease in children. Covid-19 - mildt forlop hos barn. 2020;140(6).
3. González Romero D, Ocampo Pérez J, González Bautista L, Santana-Cabrera L. [Pregnancy and perinatal outcome of a woman with COVID-19 infection]. *Revista clinica española*. 2020.
4. Perez-Girbes A. Acute Pulmonary Embolism and Covid-19: A Common Association in Seriously Ill Patients? Tromboembolia pulmonar aguda y enfermedad por coronavirus (COVID-19): una asociación frecuente en pacientes graves? 2020.
5. Sánchez-Álvarez JE, Pérez Fontán M, Jiménez Martín C, Blasco Pelicano M, Cabezas Reina CJ, Sevillano Prieto Á M, et al. SARS-CoV-2 infection in patients on renal replacement therapy. Report of the COVID-19 Registry of the Spanish Society of Nephrology (SEN). *Nefrología : publicación oficial de la Sociedad Española Nefrología*. 2020.

#### **Excluded – no/wrong outcome (n=69)**

1. Abrams HR, Loomer L, Gandhi A, Grabowski DC. Characteristics of U.S. Nursing Homes with COVID-19 Cases. *Journal of the American Geriatrics Society*. 2020.
2. Alanio A, Delliere S, Fodil S, Bretagne S, Megarbane B. Prevalence of putative invasive pulmonary aspergillosis in critically ill patients with COVID-19. *The Lancet Respiratory medicine*. 2020;8(6):e48-e9.
3. Alvarez-Aragon LM, Cuesta-Munoz AL, Alvarez-Lopez I. Inquiring into Benefits of Independent Activation of Non-Classical Renin-Angiotensin System in the Clinical Prognosis and Reduction of COVID-19 mortality. *Clinical infectious diseases : an official publication of the Infectious Diseases Society of America*. 2020.
4. Arnaud F, Laura T, Yoann M, Rebecca G, Camille B, Nathalie J, et al. Cluster of COVID-19 in northern France: A retrospective closed cohort study. *medRxiv*. 2020.
5. Bandi S, Nevid MZ, Mahdavinia M. African American children are at higher risk of COVID-19 infection. *Pediatric allergy and immunology : official publication of the European Society of Pediatric Allergy and Immunology*. 2020.
6. Benzakoun J, Hmeydia G, Delabarde T, Hamza L, Meder J-F, Ludes B, et al. Excess out-of-hospital deaths during COVID-19 outbreak: evidence of pulmonary embolism as a main determinant. *European journal of heart failure*. 2020.
7. Bhasker AG, Greve JW. Are Patients Suffering from Severe Obesity Getting a Raw Deal During COVID-19 Pandemic? *Obesity surgery*. 2020:1-2.
8. Bouquet J, Tabor DE, Silver JS, Nair V, Tovchigrechko A, Griffin MP, et al. Microbial burden and viral exacerbations in a longitudinal multicenter COPD cohort. *Respiratory research*. 2020;21(1):77.

9. Carignan A, Valiquette L, Grenier C, Musonera JB, Nkengurutse D, Marcil-Héguy A, et al. Anosmia and dysgeusia associated with SARS-CoV-2 infection: an age-matched case-control study. *Cmaj*. 2020;192(26):E702-e7.
10. Chiappetta S, Sharma AM, Bottino V, Stier C. COVID-19 and the role of chronic inflammation in patients with obesity. *International journal of obesity* (2005). 2020.
11. Chin T, Kahn R, Li R, Chen JT, Krieger N, Buckee CO, et al. U.S. county-level characteristics to inform equitable COVID-19 response. *medRxiv : the preprint server for health sciences*. 2020.
12. Cilia R, Bonvegna S, Straccia G, Andreasi NG, Elia AE, Romito LM, et al. Effects of COVID-19 on Parkinson's Disease Clinical Features: A Community-Based Case-Control Study. *Movement disorders : official journal of the Movement Disorder Society*. 2020.
13. Clemency BM, Varughese R, Scheafer DK, Ludwig B, Welch JV, McCormack RF, et al. Symptom Criteria for COVID-19 Testing of Health Care Workers. *Acad Emerg Med*. 2020;27(6):469-74.
14. Cox ZL, Lai P, Lindenfeld J. Deceases in Acute Heart Failure Hospitalizations during COVID-19. *European journal of heart failure*. 2020.
15. D'Avolio A, Avataneo V, Manca A, Cusato J, De Nicolo A, Lucchini R, et al. 25-Hydroxyvitamin D Concentrations Are Lower in Patients with Positive PCR for SARS-CoV-2. *Nutrients*. 2020;12(5).
16. Dangis A, De Brucker N, Heremans A, Gillis M, Frans J, Demeyere A, et al. Impact of gender on extent of lung injury in COVID-19. *Clinical radiology*. 2020;75(7):554-6.
17. David AK, Scott K, Olivier E. Clinical and Genetic Characteristics of Covid-19 Patients from UK Biobank. *medRxiv*. 2020.
18. de Lusignan S, Dorward J, Correa A, Jones N, Akinyemi O, Amirthalingam G, et al. Risk factors for SARS-CoV-2 among patients in the Oxford Royal College of General Practitioners Research and Surveillance Centre primary care network: a cross-sectional study. *The Lancet Infectious diseases*. 2020.
19. Di Castelnuovo A, De Caterina R, de Gaetano G, Iacoviello L. Controversial Relationship between Renin-Angiotensin System Inhibitors and Severity of COVID-19: Announcing a Large Multicentre Case-Control Study in Italy. *Hypertension (Dallas, Tex : 1979)*. 2020.
20. Doglietto F, Vezzoli M, Gheza F, Lussardi GL, Domenicucci M, Vecchiarelli L, et al. Factors Associated With Surgical Mortality and Complications Among Patients With and Without Coronavirus Disease 2019 (COVID-19) in Italy. *JAMA surgery*. 2020.
21. Dreher M, Kersten A, Bickenbach J, Balfanz P, Hartmann B, Cornelissen C, et al. The Characteristics of 50 Hospitalized COVID-19 Patients With and Without ARDS. *Deutsches Arzteblatt international*. 2020;117(16):271-8.
22. Duffy CR, Hart JM, Modest AM, Hacker MR, Golen T, Li Y, et al. Lymphopenia and Severe Acute Respiratory Syndrome Coronavirus 2 (SARS-CoV-2) Infection Among Hospitalized Obstetric Patients. *Obstetrics and gynecology*. 2020.



23. Favalli EG, Agape E, Caporali R. Incidence and Clinical Course of COVID-19 in Patients with Connective Tissue Diseases: A Descriptive Observational Analysis. *The Journal of rheumatology*. 2020.
24. Fernandez-Nieto D, Jimenez-Cauhe J, Suarez-Valle A, Moreno-Arrones OM, Saceda-Corralo D, Arana-Raja A, et al. Characterization of acute acro-ischemic lesions in non-hospitalized patients: a case series of 132 patients during the COVID-19 outbreak. *Journal of the American Academy of Dermatology*. 2020.
25. Fore HH. A wake-up call: COVID-19 and its impact on children's health and wellbeing. *The Lancet Global health*. 2020.
26. Garufi G, Carbognin L, Orlandi A, Tortora G, Bria E. Smoking habit and hospitalization for severe acute respiratory syndrome coronavirus 2 (SARS-CoV-2)-related pneumonia: The unsolved paradox behind the evidence. *European journal of internal medicine*. 2020.
27. Gemes K, Talback M, Modig K, Ahlbom A, Berglund A, Feychting M, et al. Burden and prevalence of prognostic factors for severe COVID-19 in Sweden. *European journal of epidemiology*. 2020;35(5):401-9.
28. Godaert L, Proye E, Demoustier-Tampere D, Coulibaly PS, Hequet F, Drame M. Clinical characteristics of older patients: The experience of a geriatric short-stay unit dedicated to patients with COVID-19 in France. *The Journal of infection*. 2020.
29. Haecck G, Ancion A, Marechal P, Oury C, Lancellotti P. [COVID-19 and cardiovascular diseases]. *COVID-19 et maladies cardiovasculaires*. 2020;75(4):226-32.
30. Hastie CE, Mackay DF, Ho F, Celis-Morales CA, Katikireddi SV, Niedzwiedz CL, et al. Vitamin D concentrations and COVID-19 infection in UK Biobank. *Diabetes Metab Syndr*. 2020;14(4):561-5.
31. Himmelstein DU, Woolhandler S. Health Insurance Status and Risk Factors for Poor Outcomes With COVID-19 Among U.S. Health Care Workers: A Cross-sectional Study. *Annals of internal medicine*. 2020.
32. Hirsch JS, Ng JH, Ross DW, Sharma P, Shah HH, Barnett RL, et al. Acute kidney injury in patients hospitalized with COVID-19. *Kidney international*. 2020.
33. Iacobellis G, Penaherrera CA, Bermudez LE, Bernal Mizrahi E. Admission hyperglycemia and radiological findings of SARS-CoV2 in patients with and without diabetes. *Diabetes research and clinical practice*. 2020;164:108185.
34. Ibrahim LF, Tosif S, McNab S, Hall S, Lee HJ, Lewena S, et al. SARS-CoV-2 testing and outcomes in the first 30 days after the first case of COVID-19 at an Australian children's hospital. *Emerg Med Australas*. 2020.
35. Jo MW, Go DS, Kim R, Lee SW, Ock M, Kim YE, et al. The Burden of Disease due to COVID-19 in Korea Using Disability-Adjusted Life Years. *J Korean Med Sci*. 2020;35(21):e199.
36. Kalan ME, Ghobadi H, Taleb ZB, Ward KD, Adham D, Matin S, et al. Descriptive characteristics of hospitalized adult smokers and never-smokers with COVID-19. *Tobacco induced diseases*. 2020;18:46.

37. Koehler P, Cornely OA, Bottiger BW, Dusse F, Eichenauer DA, Fuchs F, et al. COVID-19 associated pulmonary aspergillosis. *Mycoses*. 2020;63(6):528-34.
38. Lechien JR, Chiesa-Estomba CM, Place S, Van Laethem Y, Cabaraux P, Mat Q, et al. Clinical and epidemiological characteristics of 1420 European patients with mild-to-moderate coronavirus disease 2019. *J Intern Med*. 2020.
39. Leung JM, Yang CX, Tam A, Shaipanich T, Hackett T-L, Singhera GK, et al. ACE-2 expression in the small airway epithelia of smokers and COPD patients: implications for COVID-19. *The European respiratory journal*. 2020;55(5).
40. Liotta G, Marazzi MC, Orlando S, Palombi L. Is social connectedness a risk factor for the spreading of COVID-19 among older adults? The Italian paradox. *PloS one*. 2020;15(5):e0233329.
41. Lo E, Lasnier B. Active smoking and severity of coronavirus disease 2019 (COVID-19): The use of significance testing leads to an erroneous conclusion. *European journal of internal medicine*. 2020.
42. Maggi U, De Carlis L, Yiu D, Colledan M, Regalia E, Rossi G, et al. The impact of the COVID-19 outbreak on liver transplantation programs in Northern Italy. *Am J Transplant*. 2020;20(7):1840-8.
43. Michelena X, Borrell H, Lopez-Corbeto M, Lopez-Lasanta M, Moreno E, Pascual-Pastor M, et al. Incidence of COVID-19 in a cohort of adult and paediatric patients with rheumatic diseases treated with targeted biologic and synthetic disease-modifying anti-rheumatic drugs. *Seminars in arthritis and rheumatism*. 2020;50(4):564-70.
44. Montopoli M, Zumerle S, Vettor R, Rugge M, Zorzi M, Catapano CV, et al. Androgen-deprivation therapies for prostate cancer and risk of infection by SARS-CoV-2: a population-based study (N = 4532). *Ann Oncol*. 2020.
45. Moschovas MC, Sighinolfi MC, Rocco B, Bhat S, Onof F, Rogers T, et al. Balancing the Effects of COVID-19 Against Potential Progression and Mortality in High-risk Prostate Cancer. *European urology*. 2020.
46. Nahama A, Ramachandran R, Cisternas AF, Ji H. The role of afferent pulmonary innervation in poor prognosis of acute respiratory distress syndrome in COVID-19 patients and proposed use of resiniferatoxin (RTX) to improve patient outcomes in advanced disease state: A review. *Medicine in drug discovery*. 2020:100033.
47. Notari A, Torrieri G. COVID-19 transmission risk factors. *medRxiv*. 2020.
48. Nouhjah S, Jahanfar S. Challenges of diabetes care management in developing countries with a high incidence of COVID-19: A brief report. *Diabetes & metabolic syndrome*. 2020;14(5):731-2.
49. Ossami Saidy RR, Globke B, Pratschke J, Schoening W, Eurich D. Successful implementation of preventive measures leads to low relevance of SARS-CoV-2 in liver transplant patients: Observations from a German outpatient department. *Transplant infectious disease : an official journal of the Transplantation Society*. 2020.

50. Pan F, Ye T, Sun P, Gui S, Liang B, Li L, et al. Time Course of Lung Changes at Chest CT during Recovery from Coronavirus Disease 2019 (COVID-19). *Radiology*. 2020;295(3):715-21.
51. Piccolo R, Bruzzese D, Mauro C, Aloia A, Baldi C, Boccalatte M, et al. Population Trends in Rates of Percutaneous Coronary Revascularization for Acute Coronary Syndromes Associated with the COVID-19 Outbreak. *Circulation*. 2020.
52. Pinto BG, Oliveira AE, Singh Y, Jimenez L, Goncalves AN, Ogava RL, et al. ACE2 Expression is Increased in the Lungs of Patients with Comorbidities Associated with Severe COVID-19. *medRxiv : the preprint server for health sciences*. 2020.
53. Ramcharan T, Nolan O, Lai CY, Prabhu N, Krishnamurthy R, Richter AG, et al. Paediatric Inflammatory Multisystem Syndrome: Temporally Associated with SARS-CoV-2 (PIMS-TS): Cardiac Features, Management and Short-Term Outcomes at a UK Tertiary Paediatric Hospital. *Pediatric cardiology*. 2020.
54. Rapezzi C, Tavazzi L, Ferrari R. The 'Black Death' and the physician at the time of COVID-19. *European heart journal*. 2020.
55. Reynolds HR, Adhikari S, Pulgarin C, Troxel AB, Iturrate E, Johnson SB, et al. Renin-Angiotensin-Aldosterone System Inhibitors and Risk of Covid-19. *The New England journal of medicine*. 2020.
56. Roxby AC, Greninger AL, Hatfield KM, Lynch JB, Dellit TH, James A, et al. Outbreak Investigation of COVID-19 Among Residents and Staff of an Independent and Assisted Living Community for Older Adults in Seattle, Washington. *JAMA Intern Med*. 2020.
57. Salzano A, D'Assante R, Stagnaro FM, Valente V, Crisci G, Giardino F, et al. Heart failure management during COVID-19 outbreak in Italy. Telemedicine experience from a heart failure university tertiary referral centre. *European journal of heart failure*. 2020.
58. Sardu C, D'Onofrio N, Balestrieri ML, Barbieri M, Rizzo MR, Messina V, et al. Outcomes in Patients With Hyperglycemia Affected by Covid-19: Can We Do More on Glycemic Control? *Diabetes care*. 2020.
59. Seltzer JA, Okeke CAV, Perry JD, Shipman WD, Okoye GA, Byrd AS. Exploring the risk of severe COVID-19 infection in hidradenitis suppurativa patients. *Journal of the American Academy of Dermatology*. 2020.
60. Sierpiński R, Pinkas J, Jankowski M, Zgliczyński WS, Wierzba W, Gujski M, et al. Sex differences in the frequency of gastrointestinal symptoms and olfactory or taste disorders in 1942 nonhospitalized patients with coronavirus disease 2019 (COVID-19). *Pol Arch Intern Med*. 2020;130(6):501-5.
61. Siniscalchi A, Gallelli L. Could COVID-19 represent a negative prognostic factor in patients with stroke? *Infection control and hospital epidemiology*. 2020:1.
62. Stoneham SM, Milne KM, Nuttal E, Frew GH, Sturrock BR, Sivaloganathan H, et al. Thrombotic risk in COVID-19: a case series and case-control study. *Clinical medicine (London, England)*. 2020.

63. Tang JW, Young S, May S, Bird P, Bron J, Mohamedanif T, et al. Comparing hospitalised, community and staff COVID-19 infection rates during the early phase of the evolving COVID-19 epidemic. *The Journal of infection*. 2020.
64. Tekbali A, Grunebaum A, Saraya A, McCullough L, Bornstein E, Chervenak FA. Pregnant vs nonpregnant severe acute respiratory syndrome coronavirus 2 and coronavirus disease 2019 hospital admissions: the first 4 weeks in New York. *American journal of obstetrics and gynecology*. 2020.
65. Tolia VM, Chan TC, Castillo EM. Preliminary Results of Initial Testing for Coronavirus (COVID-19) in the Emergency Department. *The western journal of emergency medicine*. 2020;21(3):503-6.
66. Tostmann A, Bradley J, Bousema T, Yiek WK, Holwerda M, Bleeker-Rovers C, et al. Strong associations and moderate predictive value of early symptoms for SARS-CoV-2 test positivity among healthcare workers, the Netherlands, March 2020. *Euro Surveill*. 2020;25(16).
67. Wander PL, Orlov M, Merel SE, Enquobahrie DA. Risk factors for severe COVID-19 illness in healthcare workers: Too many unknowns. *Infection control and hospital epidemiology*. 2020:1-2.
68. Zahra R-E, Celeste M, Maddalena A, Mae SB, Jackie C, Cyrus C, et al. NON-WHITE ETHNICITY, MALE SEX, AND HIGHER BODY MASS INDEX, BUT NOT MEDICATIONS ACTING ON THE RENIN-ANGIOTENSIN SYSTEM ARE ASSOCIATED WITH CORONAVIRUS DISEASE 2019 (COVID-19) HOSPITALISATION: REVIEW OF THE FIRST 669 CASES FROM THE UK BIOBANK. *medRxiv*. 2020.
69. Zwald ML, Lin W, Sondermeyer Cooksey GL, Weiss C, Suarez A, Fischer M, et al. Rapid Sentinel Surveillance for COVID-19 - Santa Clara County, California, March 2020. *MMWR Morb Mortal Wkly Rep*. 2020;69(14):419-21.

#### **Excluded – no/wrong risk factor (n=63)**

1. Al-Tawfiq JA, Leonardi R, Fasoli G, Rigamonti D. Prevalence and fatality rates of COVID-19: What are the reasons for the wide variations worldwide? *Travel medicine and infectious disease*. 2020:101711.
2. Alberti P, Beretta S, Piatti M, Karantzoulis A, Piatti ML, Santoro P, et al. Guillain-Barre syndrome related to COVID-19 infection. *Neurology(R) neuroimmunology & neuroinflammation*. 2020;7(4).
3. Balnis J, Adam AP, Chopra A, Chieng HC, Feustel PJ, Overmyer KA, et al. Higher plasma levels of Chemokine CCL19 are associated with poor SARS-CoV-2 acute respiratory distress syndrome (ARDS) outcomes. *medRxiv : the preprint server for health sciences*. 2020.
4. Barrasa H, Rello J, Tejada S, Martín A, Balziskueta G, Vinuesa C, et al. SARS-Cov-2 in Spanish Intensive Care: Early Experience with 15-day Survival In Vitoria. *Anaesthesia, critical care & pain medicine*. 2020.

5. Bundschuh C, Egger M, Wiesinger K, Gabriel C, Clodi M, Mueller T, et al. Evaluation of the EDI enzyme linked immunosorbent assays for the detection of SARS-CoV-2 IgM and IgG antibodies in human plasma. *Clin Chim Acta*. 2020;509:79-82.
6. Cantador E, Núñez A, Sobrino P, Espejo V, Fabia L, Vela L, et al. Incidence and consequences of systemic arterial thrombotic events in COVID-19 patients. *J Thromb Thrombolysis*. 2020:1-5.
7. Chan L, Chaudhary K, Saha A, Chauhan K, Vaid A, Baweja M, et al. Acute Kidney Injury in Hospitalized Patients with COVID-19. *medRxiv : the preprint server for health sciences*. 2020.
8. Chatterjee A, Gerdes MW, Martinez SG. Statistical Explorations and Univariate Timeseries Analysis on COVID-19 Datasets to Understand the Trend of Disease Spreading and Death. *Sensors (Basel, Switzerland)*. 2020;20(11).
9. Chen W, Lan Y, Yuan X, Deng X, Li Y, Cai X, et al. Detectable 2019-nCoV viral RNA in blood is a strong indicator for the further clinical severity. *Emerging microbes & infections*. 2020;9(1):469-73.
10. Cheng F-Y, Joshi H, Tandon P, Freeman R, Reich DL, Mazumdar M, et al. Using Machine Learning to Predict ICU Transfer in Hospitalized COVID-19 Patients. *Journal of clinical medicine*. 2020;9(6).
11. David E, Frauke D, Luis B, Maria B, Agustin A, Pietro I, et al. The ABO blood group locus and a chromosome 3 gene cluster associate with SARS-CoV-2 respiratory failure in an Italian-Spanish genome-wide association analysis. *medRxiv*. 2020.
12. De Natale G, Ricciardi V, De Luca G, De Natale D, Di Meglio G, Ferragamo A, et al. The COVID-19 Infection in Italy: A Statistical Study of an Abnormally Severe Disease. *Journal of clinical medicine*. 2020;9(5).
13. Demelo-Rodríguez P, Cervilla-Muñoz E, Ordieres-Ortega L, Parra-Virto A, Toledano-Macías M, Toledo-Samaniego N, et al. Incidence of asymptomatic deep vein thrombosis in patients with COVID-19 pneumonia and elevated D-dimer levels. *Thromb Res*. 2020;192:23-6.
14. Dursun R, Temiz SA. The clinics of HHV-6 infection in COVID-19 pandemic: Pityriasis rosea and Kawasaki disease. *Dermatol Ther*. 2020:e13730.
15. Gautret P, Lagier J-C, Parola P, Hoang VT, Meddeb L, Sevestre J, et al. Clinical and microbiological effect of a combination of hydroxychloroquine and azithromycin in 80 COVID-19 patients with at least a six-day follow up: A pilot observational study. *Travel medicine and infectious disease*. 2020;34:101663.
16. Giudicessi JR, Roden DM, Wilde AAM, Ackerman MJ. Genetic susceptibility for COVID-19-associated sudden cardiac death in African Americans. *Heart rhythm*. 2020.
17. Goldstein MR, Poland GA, Graeber CW. Are certain drugs associated with enhanced mortality in COVID-19? *QJM : monthly journal of the Association of Physicians*. 2020.
18. Hernigou J, Cornil F, Poignard A, El Bouchaibi S, Mani J, Naouri JF, et al. Thoracic computerised tomography scans in one hundred eighteen orthopaedic patients during the

COVID-19 pandemic: identification of chest lesions; added values; help in managing patients; burden on the computerised tomography scan department. *Int Orthop*. 2020;1-10.

19. Ihle-Hansen H, Berge T, Tveita A, Ronning EJ, Erno PE, Andersen EL, et al. COVID-19: Symptoms, course of illness and use of clinical scoring systems for the first 42 patients admitted to a Norwegian local hospital. *Covid-19: Symptomer, forlop og bruk av kliniske skaringsverktøy hos de 42 forste pasientene innlagt pa et norsk lokalsykehus*. 2020;140(7).
20. Ikitimur H, Borku Uysal B, Cengiz M, Ikitimur B, Uysal H, Ozcan E, et al. "Determining Host Factors Contributing to Disease Severity in a Family Cluster of 29 Hospitalized SARS-CoV-2 Patients: Could Genetic Factors Be Relevant in the Clinical Course of COVID-19?". *Journal of medical virology*. 2020.
21. Jain R, Young M, Dogra S, Kennedy H, Nguyen V, Raz E. Surprise Diagnosis of COVID-19 following Neuroimaging Evaluation for Unrelated Reasons during the Pandemic in Hot Spots. *AJNR Am J Neuroradiol*. 2020.
22. Ji H-L, Zhao R, Matalon S, Matthay MA. Elevated Plasmin(ogen) as a Common Risk Factor for COVID-19 Susceptibility. *Physiological reviews*. 2020;100(3):1065-75.
23. Kang Y, Chen T, Mui D, Ferrari V, Jagasia D, Scherrer-Crosbie M, et al. Cardiovascular manifestations and treatment considerations in covid-19. *Heart (British Cardiac Society)*. 2020.
24. Kong Q, Xiang Z, Wu Y, Gu Y, Guo J, Geng F. Analysis of the susceptibility of lung cancer patients to SARS-CoV-2 infection. *Molecular cancer*. 2020;19(1):80.
25. Kox M, Frenzel T, Schouten J, van de Veerdonk FL, Koenen HJPM, Pickkers P, et al. COVID-19 patients exhibit less pronounced immune suppression compared with bacterial septic shock patients. *Critical care (London, England)*. 2020;24(1):263.
26. Kyle J, Maedeh K-K, Blake J, Larisa GT. The Association Between Angiotensin-Converting Enzyme Inhibitors and Angiotensin Receptor Blockers and the Number of Covid-19 Confirmed Cases and Deaths in the United States: Geospatial Study. *medRxiv*. 2020.
27. Lala A, Johnson KW, Russak AJ, Paranjpe I, Zhao S, Solani S, et al. Prevalence and Impact of Myocardial Injury in Patients Hospitalized with COVID-19 Infection. *medRxiv : the preprint server for health sciences*. 2020.
28. Larson AS, Savastano L, Kadirvel R, Kallmes DF, Hassan AE, Brinjikji W. COVID-19 and the Cerebro-Cardiovascular Systems: What do we Know so Far? *Journal of the American Heart Association*. 2020:e016793.
29. Liu F, Li L, Xu M, Wu J, Luo D, Zhu Y, et al. Prognostic value of interleukin-6, C-reactive protein, and procalcitonin in patients with COVID-19. *Journal of clinical virology : the official publication of the Pan American Society for Clinical Virology*. 2020;127:104370.
30. Liu Z, Jin C, Wu CC, Liang T, Zhao H, Wang Y, et al. Association between Initial Chest CT or Clinical Features and Clinical Course in Patients with Coronavirus Disease 2019 Pneumonia. *Korean journal of radiology*. 2020;21(6):736-45.
31. Lyons-Weiler J. Pathogenic Priming Likely Contributes to Serious and Critical Illness and Mortality in COVID-19 via Autoimmunity. *Journal of translational autoimmunity*. 2020:100051.

32. Mancia G, Rea F, Ludergnani M, Apolone G, Corrao G. Renin-Angiotensin-Aldosterone System Blockers and the Risk of Covid-19. *The New England journal of medicine*. 2020.
33. Marullo AG, Cavarretta E, Biondi-Zoccai G, Mancone M, Peruzzi M, Piscioneri F, et al. Extracorporeal membrane oxygenation for critically ill patients with coronavirus-associated disease 2019: an updated perspective of the European experience. *Minerva cardioangiologica*. 2020.
34. Mathew D, Giles JR, Baxter AE, Greenplate AR, Wu JE, Alanio C, et al. Deep immune profiling of COVID-19 patients reveals patient heterogeneity and distinct immunotypes with implications for therapeutic interventions. *bioRxiv : the preprint server for biology*. 2020.
35. McRae MP, Simmons GW, Christodoulides NJ, Lu Z, Kang SK, Fenyo D, et al. Clinical Decision Support Tool and Rapid Point-of-Care Platform for Determining Disease Severity in Patients with COVID-19. *medRxiv : the preprint server for health sciences*. 2020.
36. Mehta N, Kalra A, Nowacki AS, Anjewierden S, Han Z, Bhat P, et al. Association of Use of Angiotensin-Converting Enzyme Inhibitors and Angiotensin II Receptor Blockers With Testing Positive for Coronavirus Disease 2019 (COVID-19). *JAMA cardiology*. 2020.
37. Negri E, Scarpino V, La Vecchia C. Prevalence of COVID-19-like symptoms in Italy and Lombardy, March-April 2020, and their implications on cancer prevention, diagnosis and management. *Eur J Cancer Prev*. 2020.
38. Öztürk F, Karaduman M, Çoldur R, İncecik Ş, Güneş Y, Tuncer M. Interpretation of arrhythmogenic effects of COVID-19 disease through ECG. *Aging Male*. 2020:1-4.
39. Park PG, Kim CH, Heo Y, Kim TS, Park CW, Kim CH. Out-of-Hospital Cohort Treatment of Coronavirus Disease 2019 Patients with Mild Symptoms in Korea: an Experience from a Single Community Treatment Center. *Journal of Korean medical science*. 2020;35(13):e140.
40. Patel A, Charani E, Ariyanayagam D, Abdulaal A, Denny SJ, Mughal N, et al. New-onset anosmia and ageusia in adult patients diagnosed with SARS-CoV-2 infection. *Clin Microbiol Infect*. 2020.
41. Pereira A, Cruz-Melguizo S, Adrien M, Fuentes L, Marin E, Perez-Medina T. Clinical course of Coronavirus Disease-2019 (COVID-19) in pregnancy. *Acta obstetrica et gynecologica Scandinavica*. 2020.
42. Pinto BGG, Oliveira AER, Singh Y, Jimenez L, Goncalves ANA, Ogava RLT, et al. ACE2 Expression is Increased in the Lungs of Patients with Comorbidities Associated with Severe COVID-19. *The Journal of infectious diseases*. 2020.
43. Potdar AA, Dube S, Naito T, Botwin G, Haritunians T, Li D, et al. Reduced expression of COVID-19 host receptor, ACE2 is associated with small bowel inflammation, more severe disease, and response to anti-TNF therapy in Crohn's disease. *medRxiv : the preprint server for health sciences*. 2020.
44. Renieris G, Katrini K, Damoulari C, Akinosoglou K, Psarrakis C, Kyriakopoulou M, et al. Serum Hydrogen Sulfide and Outcome Association in Pneumonia by the SARS-CoV-2 Coronavirusxs. *Shock (Augusta, Ga)*. 2020.

45. Roschewski M, Lionakis MS, Sharman JP, Roswarski J, Goy A, Monticelli MA, et al. Inhibition of Bruton tyrosine kinase in patients with severe COVID-19. *Science immunology*. 2020;5(48).
46. Rovina N, Akinosoglou K, Eugen-Olsen J, Hayek S, Reiser J, Giamarellos-Bourboulis EJ. Soluble urokinase plasminogen activator receptor (suPAR) as an early predictor of severe respiratory failure in patients with COVID-19 pneumonia. *Critical care (London, England)*. 2020;24(1):187.
47. Rubin SJS, Falkson SR, Degner NR, Blish C. Clinical characteristics associated with COVID-19 severity in California. *Journal of Clinical and Translational Science*. 2020:1-4.
48. Sayoni D, Krystyna T, Matthew P, James K, Marcin P, Claus Erik J, et al. Identification and Analysis of Shared Risk Factors in Sepsis and High Mortality Risk COVID-19 Patients. *medRxiv*. 2020.
49. Sberna G, Amendola A, Valli MB, Carletti F, Capobianchi MR, Bordi L, et al. Trend of respiratory pathogens during the COVID-19 epidemic. *J Clin Virol*. 2020;129:104470.
50. Shant A, Juan AR, Lei L, Carolyn T. The Association Between Biomarkers and Clinical Outcomes in Novel Coronavirus (COVID-19) Pneumonia in a U.S. Cohort. *medRxiv*. 2020.
51. Smith-Ray R, Roberts EE, Littleton DE, Singh T, Sandberg T, Taitel M. United States distribution of patients at risk for complications related to COVID-19. *JMIR public health and surveillance*. 2020.
52. Solaimanzadeh I. Nifedipine and Amlodipine Are Associated With Improved Mortality and Decreased Risk for Intubation and Mechanical Ventilation in Elderly Patients Hospitalized for COVID-19. *Cureus*. 2020;12(5):e8069.
53. Tharakan S, Nomoto K, Miyashita S, Ishikawa K. Body temperature correlates with mortality in COVID-19 patients. *Critical care (London, England)*. 2020;24(1):298.
54. Tobias H, III, Vindi J, Chiara A, Johannes CH, Michael B-B, Matthias K, et al. Level of IL-6 predicts respiratory failure in hospitalized symptomatic COVID-19 patients. *medRxiv*. 2020.
55. Toubiana J, Poirault C, Corsia A, Bajolle F, Fourgeaud J, Angoulvant F, et al. Kawasaki-like multisystem inflammatory syndrome in children during the covid-19 pandemic in Paris, France: prospective observational study. *Bmj*. 2020;369:m2094.
56. Vaira LA, Deiana G, Fois AG, Pirina P, Madeddu G, De Vito A, et al. Objective evaluation of anosmia and ageusia in COVID-19 patients: Single-center experience on 72 cases. *Head & neck*. 2020;42(6):1252-8.
57. Vanni G, Materazzo M, Santori F, Pellicciaro M, Costesta M, Orsaria P, et al. The Effect of Coronavirus (COVID-19) on Breast Cancer Teamwork: A Multicentric Survey. *In Vivo*. 2020;34(3 Suppl):1685-94.
58. Wadhera RK, Wadhera P, Gaba P, Figueroa JF, Joynt Maddox KE, Yeh RW, et al. Variation in COVID-19 Hospitalizations and Deaths Across New York City Boroughs. *JAMA*. 2020.



59. Wollenstein-Betech S, Cassandras CG, Paschalidis IC. Personalized Predictive Models for Symptomatic COVID-19 Patients Using Basic Preconditions: Hospitalizations, Mortality, and the Need for an ICU or Ventilator. *medRxiv : the preprint server for health sciences*. 2020.
60. Yadaw AS, Li Y-C, Bose S, Iyengar R, Bunyavanich S, Pandey G. Clinical predictors of COVID-19 mortality. *medRxiv : the preprint server for health sciences*. 2020.
61. Zaninotto M, Mion MM, Cosma C, Rinaldi D, Plebani M. Presepsin in risk stratification of SARS-CoV-2 patients. *Clinica chimica acta; international journal of clinical chemistry*. 2020;507:161-3.
62. Zietz M, Tatonetti NP. Testing the association between blood type and COVID-19 infection, intubation, and death. *medRxiv : the preprint server for health sciences*. 2020.
63. Zietz M, Tatonetti N. Testing the association between blood type and COVID-19 infection, intubation, and death. *medRxiv : the preprint server for health sciences*. 2020.

#### **Excluded – unadjusted data (n=69)**

1. Coronavirus Disease 2019 in Children - United States, February 12-April 2, 2020. *MMWR Morb Mortal Wkly Rep*. 2020;69(14):422-6.
2. COVID-19, Australia: Epidemiology Report 15 (Reporting week to 23:59 AEST 10 May 2020). *Commun Dis Intell (2018)*. 2020;44.
3. Aggarwal S, Garcia-Telles N, Aggarwal G, Lavie C, Lippi G, Henry BM. Clinical features, laboratory characteristics, and outcomes of patients hospitalized with coronavirus disease 2019 (COVID-19): Early report from the United States. *Diagnosis (Berlin, Germany)*. 2020;7(2):91-6.
4. Arentz M, Yim E, Klaff L, Lokhandwala S, Riedo FX, Chong M, et al. Characteristics and Outcomes of 21 Critically Ill Patients With COVID-19 in Washington State. *JAMA*. 2020.
5. Argenziano MG, Bruce SL, Slater CL, Tiao JR, Baldwin MR, Barr RG, et al. Characterization and clinical course of 1000 Patients with COVID-19 in New York: retrospective case series. *medRxiv : the preprint server for health sciences*. 2020.
6. Argenziano MG, Bruce SL, Slater CL, Tiao JR, Baldwin MR, Barr RG, et al. Characterization and clinical course of 1000 patients with coronavirus disease 2019 in New York: retrospective case series. *BMJ (Clinical research ed)*. 2020;369:m1996.
7. Bhopal S, Bagaria J, Bhopal R. Children's mortality from COVID-19 compared with all-deaths and other relevant causes of death: epidemiological information for decision-making by parents, teachers, clinicians and policymakers. *Public health*. 2020;185:19-20.
8. Biagi A, Rossi L, Malagoli A, Zanni A, Sticozzi C, Comastri G, et al. Clinical and epidemiological characteristics of 320 deceased Covid-19 patients in an Italian Province: a retrospective observational study. *Journal of medical virology*. 2020.
9. Blitz MJ, Grunebaum A, Tekbali A, Bornstein E, Rochelson B, Nimaroff M, et al. Intensive care unit admissions for pregnant and nonpregnant women with coronavirus disease 2019. *American journal of obstetrics and gynecology*. 2020.

10. Borghesi A, Zigliani A, Masciullo R, Golemi S, Maculotti P, Farina D, et al. Radiographic severity index in COVID-19 pneumonia: relationship to age and sex in 783 Italian patients. *La Radiologia medica*. 2020;125(5):461-4.
11. Brambilla I, Castagnoli R, Caimmi S, Ciprandi G, Luigi Marseglia G. COVID-19 in the Pediatric Population Admitted to a Tertiary Referral Hospital in Northern Italy: Preliminary Clinical Data. *The Pediatric infectious disease journal*. 2020;39(7):e160.
12. Cagnacci A, Xholli A. Age-related difference in the rate of COVID-19 mortality in women versus men. *American journal of obstetrics and gynecology*. 2020.
13. Caussy C, Wallet F, Laville M, Disse E. Obesity is Associated with Severe Forms of COVID-19. *Obesity (Silver Spring, Md)*. 2020.
14. Damiani G, Pacifico A, Bragazzi NL, Malagoli P. Biologics increase the risk of SARS-CoV-2 infection and hospitalization, but not ICU admission and death: Real-life data from a large cohort during red-zone declaration. *Dermatologic therapy*. 2020:e13475.
15. DeBiasi RL, Song X, Delaney M, Bell M, Smith K, Pershad J, et al. Severe COVID-19 in Children and Young Adults in the Washington, DC Metropolitan Region. *The Journal of pediatrics*. 2020.
16. Duanmu Y, Brown IP, Gibb WR, Singh J, Matheson LW, Blomkalns AL, et al. Characteristics of Emergency Department Patients With COVID-19 at a Single Site in Northern California: Clinical Observations and Public Health Implications. *Academic emergency medicine : official journal of the Society for Academic Emergency Medicine*. 2020;27(6):505-9.
17. Easom N, Moss P, Barlow G, Samson A, Taynton T, Adams K, et al. 68 Consecutive patients assessed for COVID-19 infection; experience from a UK regional infectious disease unit. *Influenza and other respiratory viruses*. 2020.
18. Ferguson J, Rosser JI, Quintero O, Scott J, Subramanian A, Gumma M, et al. Characteristics and Outcomes of Coronavirus Disease Patients under Nonsurge Conditions, Northern California, USA, March-April 2020. *Emerging infectious diseases*. 2020;26(8).
19. Fernandez-Ruiz M, Andres A, Loinaz C, Delgado JF, Lopez-Medrano F, San Juan R, et al. COVID-19 in solid organ transplant recipients: A single-center case series from Spain. *American journal of transplantation : official journal of the American Society of Transplantation and the American Society of Transplant Surgeons*. 2020.
20. Foster CE, Moulton EA, Munoz FM, Hulten KG, Versalovic J, Dunn J, et al. Coronavirus Disease 2019 in Children Cared for at Texas Children's Hospital: Initial Clinical Characteristics and Outcomes. *Journal of the Pediatric Infectious Diseases Society*. 2020.
21. Garazzino S, Montagnani C, Dona D, Meini A, Felici E, Vergine G, et al. Multicentre Italian study of SARS-CoV-2 infection in children and adolescents, preliminary data as at 10 April 2020. *Euro surveillance : bulletin Europeen sur les maladies transmissibles = European communicable disease bulletin*. 2020;25(18).
22. Garg S, Kim L, Whitaker M, O'Halloran A, Cummings C, Holstein R, et al. Hospitalization Rates and Characteristics of Patients Hospitalized with Laboratory-Confirmed Coronavirus

- Disease 2019 - COVID-NET, 14 States, March 1-30, 2020. *MMWR Morbidity and mortality weekly report*. 2020;69(15):458-64.
23. Gebhard C, Regitz-Zagrosek V, Neuhauser HK, Morgan R, Klein SL. Impact of sex and gender on COVID-19 outcomes in Europe. *Biology of sex differences*. 2020;11(1):29.
24. Giorgi Rossi P, Emilia-Romagna C-wg, Broccoli S, Angelini P. Case fatality rate in patients with COVID-19 infection and its relationship with length of follow up. *Journal of clinical virology : the official publication of the Pan American Society for Clinical Virology*. 2020;128:104415.
25. Gisondi P, Zaza G, Del Giglio M, Rossi M, Iacono V, Girolomoni G. Risk of hospitalization and death from COVID-19 infection in patients with chronic plaque psoriasis receiving a biologic treatment and renal transplant recipients in maintenance immunosuppressive treatment. *Journal of the American Academy of Dermatology*. 2020.
26. Goker H, Aladag Karakulak E, Demiroglu H, Ayaz Ceylan CM, Buyukasik Y, Inkaya AC, et al. The effects of blood group types on the risk of COVID-19 infection and its clinical outcome. *Turkish journal of medical sciences*. 2020.
27. Gold JAW, Wong KK, Szablewski CM, Patel PR, Rossow J, da Silva J, et al. Characteristics and Clinical Outcomes of Adult Patients Hospitalized with COVID-19 - Georgia, March 2020. *MMWR Morbidity and mortality weekly report*. 2020;69(18):545-50.
28. Grasselli G, Zangrillo A, Zanella A, Antonelli M, Cabrini L, Castelli A, et al. Baseline Characteristics and Outcomes of 1591 Patients Infected With SARS-CoV-2 Admitted to ICUs of the Lombardy Region, Italy. *JAMA*. 2020.
29. Gubatan J, Levitte S, Balabanis T, Patel A, Sharma A, Habtezion A. SARS-CoV-2 Testing, Prevalence, and Predictors of COVID-19 in Patients with Inflammatory Bowel Disease in Northern California. *Gastroenterology*. 2020.
30. Hong KS, Lee KH, Chung JH, Shin KC, Choi EY, Jin HJ, et al. Clinical Features and Outcomes of 98 Patients Hospitalized with SARS-CoV-2 Infection in Daegu, South Korea: A Brief Descriptive Study. *Yonsei medical journal*. 2020;61(5):431-7.
31. Inciardi RM, Adamo M, Lupi L, Cani DS, Di Pasquale M, Tomasoni D, et al. Characteristics and outcomes of patients hospitalized for COVID-19 and cardiac disease in Northern Italy. *European heart journal*. 2020;41(19):1821-9.
32. Israelsen SB, Kristiansen KT, Hindsberger B, Ulrik CS, Andersen O, Jensen M, et al. Characteristics of patients with COVID-19 pneumonia at Hvidovre Hospital, March-April 2020. *Danish medical journal*. 2020;67(6).
33. Itelman E, Wasserstrum Y, Segev A, Avaky C, Negru L, Cohen D, et al. Clinical Characterization of 162 COVID-19 patients in Israel: Preliminary Report from a Large Tertiary Center. *The Israel Medical Association journal : IMAJ*. 2020;22(5):271-4.
34. Kato H, Shimizu H, Shibue Y, Hosoda T, Iwabuchi K, Nagamine K, et al. Clinical course of 2019 novel coronavirus disease (COVID-19) in individuals present during the outbreak on the Diamond Princess cruise ship. *Journal of infection and chemotherapy : official journal of the Japan Society of Chemotherapy*. 2020.

35. Kayem G, Alessandrini V, Azria E, Blanc J, Bohec C, Bornes M, et al. A snapshot of the Covid-19 pandemic among pregnant women in France. *Journal of gynecology obstetrics and human reproduction*. 2020:101826.
36. Kebisek J, Forrest LJ, Maule AL, Steelman RA, Ambrose JF. Special report: Prevalence of selected underlying health conditions among active component Army service members with coronavirus disease 2019, 11 February-6 April 2020. *Msmr*. 2020;27(5):50-4.
37. Kim ES, Chin BS, Kang CK, Kim NJ, Kang YM, Choi JP, et al. Clinical Course and Outcomes of Patients with Severe Acute Respiratory Syndrome Coronavirus 2 Infection: a Preliminary Report of the First 28 Patients from the Korean Cohort Study on COVID-19. *Journal of Korean medical science*. 2020;35(13):e142.
38. Kim T, Park O, Yoo H, Ahn S, Jo J, Kim JW, et al. Epidemiological and Clinical Characteristics of Early 101 Deceased Patients in the Coronavirus Disease-19 (COVID-19) Outbreak in Republic of Korea. *SSRN*. 2020.
39. Kluytmans-van den Bergh MFQ, Buiting AGM, Pas SD, Bentvelsen RG, van den Bijllaardt W, van Oudheusden AJG, et al. Prevalence and Clinical Presentation of Health Care Workers With Symptoms of Coronavirus Disease 2019 in 2 Dutch Hospitals During an Early Phase of the Pandemic. *JAMA Netw Open*. 2020;3(5):e209673.
40. Kuno T, Takahashi M, Obata R, Maeda T. Cardiovascular comorbidities, cardiac injury, and prognosis of COVID-19 in New York City. *American heart journal*. 2020;226:24-5.
41. Latif F, Farr MA, Clerkin KJ, Habal MV, Takeda K, Naka Y, et al. Characteristics and Outcomes of Recipients of Heart Transplant With Coronavirus Disease 2019. *JAMA cardiology*. 2020.
42. Lee J, Lee YH, Chang H-H, Choi SH, Seo H, Yoo SS, et al. Comparison of short-term mortality between mechanically ventilated patients with COVID-19 and influenza in a setting of sustainable healthcare system. *The Journal of infection*. 2020.
43. Lewnard JA, Liu VX, Jackson ML, Schmidt MA, Jewell BL, Flores JP, et al. Incidence, clinical outcomes, and transmission dynamics of severe coronavirus disease 2019 in California and Washington: prospective cohort study. *BMJ (Clinical research ed)*. 2020;369:m1923.
44. Lighter J, Phillips M, Hochman S, Sterling S, Johnson D, Francois F, et al. Obesity in patients younger than 60 years is a risk factor for Covid-19 hospital admission. *Clinical infectious diseases : an official publication of the Infectious Diseases Society of America*. 2020.
45. Manzoni P, Milillo C. Covid-19 mortality in Italian doctors. *The Journal of infection*. 2020.
46. Marin-Hernandez D, Schwartz RE, Nixon DF. Epidemiological evidence for association between higher influenza vaccine uptake in the elderly and lower COVID-19 deaths in Italy. *Journal of medical virology*. 2020.
47. Medetalibeyoglu A, Senkal N, Capar G, Kose M, Tukek T. Characteristics of the initial patients hospitalized for COVID-19: a single-center report. *Turkish journal of medical sciences*. 2020.

48. Miyashita H, Mikami T, Chopra N, Yamada T, Chernyavsky S, Rizk D, et al. Do patients with cancer have a poorer prognosis of COVID-19? An experience in New York City. *Annals of oncology : official journal of the European Society for Medical Oncology*. 2020.
49. Myers LC, Parodi SM, Escobar GJ, Liu VX. Characteristics of Hospitalized Adults With COVID-19 in an Integrated Health Care System in California. *JAMA*. 2020.
50. Newport KB, Malhotra S, Widera E. Prognostication and Proactive Planning in COVID-19. *Journal of pain and symptom management*. 2020.
51. Nowak B, Szymanski P, Pankowski I, Szarowska A, Zycinska K, Rogowski W, et al. Clinical characteristics and short-term outcomes of patients with coronavirus disease 2019: a retrospective single-center experience of a designated hospital in Poland. *Polish archives of internal medicine*. 2020;130(5):407-11.
52. Oualha M, Bendavid M, Berteloot L, Corsia A, Lesage F, Vedrenne M, et al. Severe and fatal forms of COVID-19 in children. *Archives de pediatrie : organe officiel de la Societe francaise de pediatrie*. 2020.
53. Paranjpe I, Russak A, De Freitas JK, Lala A, Miotto R, Vaid A, et al. Clinical Characteristics of Hospitalized Covid-19 Patients in New York City. *medRxiv : the preprint server for health sciences*. 2020.
54. Razanamahery J, Malinowski L, Humbert S, Brunel AS, Lepiller Q, Chirouze C, et al. Predictive factors of poor outcomes in the COVID-19 epidemic: Consider the inflammatory response. *Medecine et maladies infectieuses*. 2020.
55. Richardson S, Hirsch JS, Narasimhan M, Crawford JM, McGinn T, Davidson KW, et al. Presenting Characteristics, Comorbidities, and Outcomes Among 5700 Patients Hospitalized With COVID-19 in the New York City Area. *JAMA*. 2020.
56. Rogado J, Pangua C, Serrano-Montero G, Obispo B, Marino AM, Perez-Perez M, et al. Covid-19 and lung cancer: A greater fatality rate? *Lung cancer (Amsterdam, Netherlands)*. 2020;146:19-22.
57. Russell TW, Hellewell J, Jarvis CI, van Zandvoort K, Abbott S, Ratnayake R, et al. Estimating the infection and case fatality ratio for coronavirus disease (COVID-19) using age-adjusted data from the outbreak on the Diamond Princess cruise ship, February 2020. *Euro surveillance : bulletin Europeen sur les maladies transmissibles = European communicable disease bulletin*. 2020;25(12).
58. Savasi VM, Parisi F, Patane L, Ferrazzi E, Frigerio L, Pellegrino A, et al. Clinical Findings and Disease Severity in Hospitalized Pregnant Women With Coronavirus Disease 2019 (COVID-19). *Obstetrics and gynecology*. 2020.
59. Shah SJ, Barish PN, Prasad PA, Kistler AL, Neff N, Kamm J, et al. Clinical features, diagnostics, and outcomes of patients presenting with acute respiratory illness: a comparison of patients with and without COVID-19. *medRxiv : the preprint server for health sciences*. 2020.
60. Shekerdemian LS, Mahmood NR, Wolfe KK, Riggs BJ, Ross CE, McKiernan CA, et al. Characteristics and Outcomes of Children With Coronavirus Disease 2019 (COVID-19) Infection Admitted to US and Canadian Pediatric Intensive Care Units. *JAMA pediatrics*. 2020.

61. Solomon IH, Normandin E, Bhattacharyya S, Mukerji SS, Keller K, Ali AS, et al. Neuropathological Features of Covid-19. *The New England journal of medicine*. 2020.
62. Soneji S, Beltran-Sanchez H, Yang J, Mann C. Population-Level Mortality Rates from Novel Coronavirus (COVID-19) in South Korea. *medRxiv : the preprint server for health sciences*. 2020.
63. Stroppa EM, Toscani I, Citterio C, Anselmi E, Zaffignani E, Codeluppi M, et al. Coronavirus disease-2019 in cancer patients. A report of the first 25 cancer patients in a western country (Italy). *Future oncology (London, England)*. 2020.
64. Team CC-R. Characteristics of Health Care Personnel with COVID-19 - United States, February 12-April 9, 2020. *MMWR Morbidity and mortality weekly report*. 2020;69(15):477-81.
65. Team CC-R. Preliminary Estimates of the Prevalence of Selected Underlying Health Conditions Among Patients with Coronavirus Disease 2019 - United States, February 12-March 28, 2020. *MMWR Morbidity and mortality weekly report*. 2020;69(13):382-6.
66. Tedeschi S, Giannella M, Bartoletti M, Trapani F, Tadolini M, Borghi C, et al. Clinical impact of renin-angiotensin system inhibitors on in-hospital mortality of patients with hypertension hospitalized for COVID-19. *Clinical infectious diseases : an official publication of the Infectious Diseases Society of America*. 2020.
67. Tomlins J, Hamilton F, Gunning S, Sheehy C, Moran E, MacGowan A. Clinical features of 95 sequential hospitalised patients with novel coronavirus 2019 disease (COVID-19), the first UK cohort. *The Journal of infection*. 2020.
68. Turk MA, Landes SD, Formica MK, Goss KD. Intellectual and developmental disability and COVID-19 case-fatality trends: TriNetX analysis. *Disabil Health J*. 2020:100942.
69. Vuagnat P, Frelaut M, Ramtohl T, Basse C, Diakite S, Noret A, et al. COVID-19 in breast cancer patients: a cohort at the Institut Curie hospitals in the Paris area. *Breast cancer research : BCR*. 2020;22(1):55.

**Excluded – not peer reviewed/ongoing study (n=90)**

1. Evaluation of the effect of oral intermediate chain triglyceride on prognosis and course of disease in suspected outpatients with COVID-19. *Iranian Registry of Clinical Trials*. 2020.
2. Abedi V, Olulana O, Avula V, Chaudhary D, Khan A, Shahjouei S, et al. Racial, Economic and Health Inequality and COVID-19 Infection in the United States. *medRxiv : the preprint server for health sciences*. 2020.
3. Arbeitsgemeinschaft medikamentoese T. Austrian COVID-19 Registry. *clinicaltrials.gov*. 2020.
4. Assaf-Harofeh Medical C. Evaluating the Immune Response for COVID-19. *clinicaltrials.gov*. 2020.
5. Assistance Publique - Hôpitaux de P. Clinical Characterisation Protocol for COVID-19 in People Living With HIV. *clinicaltrials.gov*. 2020.

6. Assistance Publique - Hôpitaux de P. Prevalence and Impact of SARS-COV-2 Infection in Pregnant Women, Fetuses and Newborns. *clinicaltrials.gov*. 2020.
7. Assistance Publique Hopitaux De M. Morbi-mortality by COVID-19 Among Homeless People in Marseille: a Cohort Study. *clinicaltrials.gov*. 2020.
8. Austral University A. Liver Injury in Patients With COVID-19. *clinicaltrials.gov*. 2020.
9. Aveni F. CORONA: A Study Using DeltaRex-G Gene Therapy for Symptomatic COVID-19. *clinicaltrials.gov*. 2020.
10. Azienda Usl di B. Risk Factors for Prolonged Invasive Mechanical Ventilation in COVID-19 Acute Respiratory Distress Syndrome. *clinicaltrials.gov*. 2020.
11. Central Hospital NF. imPROving prenaTal carE During Confinement. *clinicaltrials.gov*. 2020.
12. Central Hospital NF. Obesity and Mortality of Critically Ill Patients With COVID-19. *clinicaltrials.gov*. 2020.
13. Centre Hospitalier Universitaire de N. Analysis of the Coagulopathy Developed by COVID-19 Infected Patients. *clinicaltrials.gov*. 2020.
14. Centre Hospitalier Universitaire de Saint E. Prediction of Clinical Course in COVID19 Patients. *clinicaltrials.gov*. 2020.
15. Complejo Hospitalario Universitario de A. Clinical-epidemiological Characterization of COVID-19 Disease in Hospitalized Older Adults. *clinicaltrials.gov*. 2020.
16. Cyrus E, Clarke R, Hadley D, Bursac Z, Trepka MJ, Devieux JG, et al. The impact of COVID-19 on African American communities in the United States. *medRxiv : the preprint server for health sciences*. 2020.
17. Direction Centrale du Service de Santé des A. Study of Clinical and Immune Severity Profiles of Patients Infected With SARS-Cov2 (COVID-19). *clinicaltrials.gov*. 2020.
18. Federation Francophone de Cancerologie D. The GCO-002 CACOV-19 Cohort: a French Nationwide Multicenter Study of COVID-19 Infected Cancer Patients. *clinicaltrials.gov*. 2020.
19. Federico IU. Clinical Characteristics of Coronavirus Disease 2019 (COVID-19) in Pregnancy: The Italian Registry on Coronavirus in Pregnancy. *clinicaltrials.gov*. 2020.
20. Fondazione per la Ricerca Ospedale M. Myeloproliferative Neoplasms (MPN) and COVID-19. *clinicaltrials.gov*. 2020.
21. French Cardiology S. COVID-19 in Cardiology Unit in France : Risk Factors for Mortality (CCF). *clinicaltrials.gov*. 2020.
22. Fundación Pública Andaluza para la gestión de la Investigación en S. Multicentric Study of Coronavirus Disease 2019 (COVID-2019) in Solid Organ Transplant Recipients. *clinicaltrials.gov*. 2020.

23. Groupe Hospitalier Paris S-J. A randomized trial of efficacy and safety of an early outpatient treatment of COVID-19 in patients with risk factor for poor outcome : a strategy to prevent hospitalization : OUTCOV Study. EU Clinical Trials Register. 2020.
24. Guha A, Bonsu J, Dey A, Addison D. Community and Socioeconomic Factors Associated with COVID-19 in the United States: Zip code level cross sectional analysis. medRxiv : the preprint server for health sciences. 2020.
25. Gustave Roussy CCGP. Epidemiology of SARS-CoV-2 and Mortality to Covid19 Disease in French Cancer Patients. clinicaltrials.gov. 2020.
26. Hamer M, Kivimaki M, Gale CR, Batty GD. Lifestyle Risk Factors for Cardiovascular Disease in Relation to COVID-19 Hospitalization: A Community-Based Cohort Study of 387,109 Adults in UK. medRxiv : the preprint server for health sciences. 2020.
27. Hasselt U. Changes in Cardiac and Pulmonary Hemodynamics as Predictor of Outcome in Hospitalized COVID-19 Patients. clinicaltrials.gov. 2020.
28. Hepatopancreatobiliary Surgery Institute of Gansu P. COVID-19 in Patients With Pre-existing Cirrhosis (COVID-Cirrhosis-CHESS2002): A Multicentre Observational Study. clinicaltrials.gov. 2020.
29. Hospices Civils de L. Prediction of Unfavourable Outcome in Newly Covid-19 Hospitalized Patient. clinicaltrials.gov. 2019.
30. Hospital Clinic of B. COVID-19 in Liver Transplant Recipients. clinicaltrials.gov. 2020.
31. Hospital de M. Prevalence and Risk Factors of SARS-CoV-2 Antibody Responses. clinicaltrials.gov. 2020.
32. Hospital General Universitario Morales M. NIV and CPAP Failure Predictors in COVID-19 Associated Respiratory Failure. clinicaltrials.gov. 2020.
33. Imperial College L. A global registry of women affected by COVID-19 in pregnancy and their babies, to guide treatment and prevention. isrctn.com. 2020.
34. Istituto Auxologico I. Predictors of Cardiovascular Risk in Covid-19 Patients During Acute Disease and at Short Term Follow-up. clinicaltrials.gov. 2020.
35. Istituto Nazionale di Ricovero e Cura per A. Clinical and Biological Predictors of COVID-19 Disease in Older Patients. clinicaltrials.gov. 2020.
36. Jean R, Matthaïos P-O, Raphael B, Paraskevas F, Jonathan T, Florian D, et al. Epidemiology, risk factors and clinical course of SARS-CoV-2 infected patients in a Swiss university hospital: an observational retrospective study. medRxiv. 2020.
37. Jonsson Comprehensive Cancer C. Role of Children in Transmission of COVID-19 to Immunocompromised Patients. clinicaltrials.gov. 2020.
38. Kanuni Sultan Suleyman T, Research H. Prognosis in Pregnant With COVID-19. clinicaltrials.gov. 2020.
39. Kanuni Sultan Suleyman T, Research H. D-dimer Levels in Pregnant With COVID-19. clinicaltrials.gov. 2020.



40. Karolinska I. Cardiovascular Risk Factors and Severe COVID-19. A Nationwide Registry-based Case-Control Study. *clinicaltrials.gov*. 2020.
41. Lassale C, Gaye B, Hamer M, Gale CR, Batty GD. Ethnic Disparities in Hospitalization for COVID-19: a Community-Based Cohort Study in the UK. *medRxiv : the preprint server for health sciences*. 2020.
42. Lindsay K, Shikha G, Alissa OH, Michael W, Huong P, Evan JA, et al. Interim Analysis of Risk Factors for Severe Outcomes among a Cohort of Hospitalized Adults Identified through the U.S. Coronavirus Disease 2019 (COVID-19)-Associated Hospitalization Surveillance Network (COVID-NET). *medRxiv*. 2020.
43. Mario Negri Institute for Pharmacological R. Early CPAP in COVID Patients With Respiratory Failure. A Prospective Cohort Study. *clinicaltrials.gov*. 2020.
44. Mayo C. Risks of COVID19 in the Pregnant Population. *clinicaltrials.gov*. 2020.
45. Millett GA, Jones AT, Benkeser D, Baral S, Mercer L, Beyrer C, et al. Assessing Differential Impacts of COVID-19 on Black Communities. *Annals of epidemiology*. 2020.
46. National, Kapodistrian University of A. The GReek Study in the Effects of Colchicine in Covid-19. *clinicaltrials.gov*. 2020.
47. National Research Center for Hematology R. Observational Prospective Cohort Study - Registry of Patients With Hematologic Disease and COVID-19 in Russia. *clinicaltrials.gov*. 2020.
48. Nayak A, Islam SJ, Mehta A, Ko Y-A, Patel SA, Goyal A, et al. Impact of Social Vulnerability on COVID-19 Incidence and Outcomes in the United States. *medRxiv : the preprint server for health sciences*. 2020.
49. Neuromed I. ACE Inhibitors, Angiotensin II Type-I Receptor Blockers and Severity of COVID-19. *clinicaltrials.gov*. 2020.
50. ObvioHealth. A COVID-19 Symptom, Exposure and Immune Response Registry. *clinicaltrials.gov*. 2020.
51. Oslo University H. Prospective Quality Register of Patients With Confirmed Covid-19 at Oslo University Hospital. *clinicaltrials.gov*. 2020.
52. Oslo University H. Risk Factors for Community- and Workplace Transmission of COVID-19. *clinicaltrials.gov*. 2020.
53. Patricio S, Hiram C. COVID-19 Fatality and Comorbidity Risk Factors among Confirmed Patients in Mexico. *medRxiv*. 2020.
54. Pitié-Salpêtrière H. Prevalence and Seroconversion of COVID-19 in Autoimmune Diseases in Europe. *clinicaltrials.gov*. 2020.
55. Pregistry. Health and Wellbeing of Pregnant and Post-Partum Women During the COVID-19 Pandemic. *clinicaltrials.gov*. 2020.
56. Ramlall V, Thangaraj P, Tatonetti NP, Shapira SD. Identification of Immune complement function as a determinant of adverse SARS-CoV-2 infection outcome. *medRxiv : the preprint server for health sciences*. 2020.

57. Region V. Observational Cohort Study of Critically Ill Patients With Covid-19 in Sweden. *clinicaltrials.gov*. 2020.
58. Rentsch CT, Kidwai-Khan F, Tate JP, Park LS, King JT, Skanderson M, et al. Covid-19 by Race and Ethnicity: A National Cohort Study of 6 Million United States Veterans. *medRxiv : the preprint server for health sciences*. 2020.
59. Rentsch CT, Kidwai-Khan F, Tate JP, Park LS, King JT, Skanderson M, et al. Covid-19 Testing, Hospital Admission, and Intensive Care Among 2,026,227 United States Veterans Aged 54-75 Years. *medRxiv : the preprint server for health sciences*. 2020.
60. Rigshospitalet D. COVID-19 Surveillance of Patients and Healthcare Workers in a Hospital Department. *clinicaltrials.gov*. 2020.
61. Rutgers TSUoNJ. Rutgers COVID-19 Cohort Study. *clinicaltrials.gov*. 2020.
62. Spanish Lung Cancer G. LunG canceR pAtients coVId19 Disease (GRAVID). *clinicaltrials.gov*. 2020.
63. St. Jude Children's Research H. Risk Factors, Clinical Characteristics and Outcomes of Acute Infection With Coronavirus 2019 (COVID-19) In Children. *clinicaltrials.gov*. 2020.
64. Szeged U. Identification of Genetic Factors Determining Disease Course in the New Type of Coronavirus Infection, COVID-19. *clinicaltrials.gov*. 2020.
65. Universidade do P. Quality of Life and Patient-centered Outcomes After UCI Admission for COVID-19. *clinicaltrials.gov*. 2020.
66. University Hospital A. COVID-19 in Hospitalised Norwegian Children - Risk Factors, Outcomes and Immunology. *clinicaltrials.gov*. 2020.
67. University Hospital BS. A Systems Approach to Predict the Outcome of SARS-CoV-2 in the Population of a City. *clinicaltrials.gov*. 2020.
68. University Hospital E. Characterization of Cardiovascular Diseases and Risk Factors in Patients With Suspected SARS-CoV2/Covid-19 Infection. *clinicaltrials.gov*. 2020.
69. University Hospital G. Predict Adverse Events by Covid-19 Nephritis. *clinicaltrials.gov*. 2020.
70. University Hospital G. Risk Factors Worsening COVID19 for Out-patient With Home Monitoring. *clinicaltrials.gov*. 2020.
71. University Hospital L. Association Between BMI and SARS-CoV-2. *clinicaltrials.gov*. 2020.
72. University Hospital L. Covid-19 in Patients With Chronic Inflammatory Rheumatism, Auto-immune or Auto-inflammatory Rare and Non-rare Diseases. *clinicaltrials.gov*. 2020.
73. University Hospital SF. Solid Organ Transplant Recipients With Covid-19 French Registry. *clinicaltrials.gov*. 2020.
74. University Hospital SF. Study of Hemostasis in Case of Severe COVID-19. *clinicaltrials.gov*. 2020.

75. University Hospital T. Assessment of Obstetric, Fetal and Neonatal Risks and Vertical SARS-CoV-2 Transmission During COVID-19 Pandemic. *clinicaltrials.gov*. 2020.
76. University Hospital T. Evaluation of the COVID-19 Infection Response in Patients Admitted to the Emergency Department for Dyspnea. *clinicaltrials.gov*. 2020.
77. University of M. International SARS-CoV-2 (COVID-19) Infection Observational Study. *clinicaltrials.gov*. 2020.
78. University of M-C. COVID-19 in Patients With HIV. *clinicaltrials.gov*. 2020.
79. University of Milano B. Predictive Factors COVID-19 Patients. *clinicaltrials.gov*. 2020.
80. University of O. Neonatal Complications of Coronavirus Disease (COVID-19). *clinicaltrials.gov*. 2020.
81. University of O. UKOSS: Pandemic COVID-19 in pregnancy. *isrctn.com*. 2020.
82. University of Sao Paulo General H. Characteristics and Outcomes of Patients With COVID-19 Admitted to the ICU. *clinicaltrials.gov*. 2020.
83. University of V. Longitudinal COVID-19 Cohort Study. *clinicaltrials.gov*. 2020.
84. University of Z. The Global PCHF-COVICAV Registry. *clinicaltrials.gov*. 2020.
85. University of Z. SARS-CoV-2 Associated Respiratory Failure Recovery (COVID-19 CAir). *clinicaltrials.gov*. 2020.
86. Uppsala U. COVID-19 in the Swedish ICU-cohort: Risk Factors of Critical Care Admission and Intensive Care Mortality. *clinicaltrials.gov*. 2020.
87. Utrecht UMC. EuRopean Study of MAJOR Infectious Disease Syndromes Related to COVID-19. *clinicaltrials.gov*. 2020.
88. Vastra Gotaland R. COVID-19 Research in Organ Transplant Recipients. *clinicaltrials.gov*. 2020.
89. Verily Life Sciences LLC. Predictors of Severe COVID-19 Outcomes. *clinicaltrials.gov*. 2020.
90. Vivek R. Cardiac Arrhythmias In Patients With Coronavirus Disease (COVID-19). *clinicaltrials.gov*. 2020.

**Excluded – not primary research study (n=175)**

1. Addeo A, Obeid M, Friedlaender A. COVID-19 and lung cancer: risks, mechanisms and treatment interactions. *Journal for immunotherapy of cancer*. 2020;8(1).
2. Aggarwal G, Cheruiyot I, Aggarwal S, Wong J, Lippi G, Lavie CJ, et al. Association of Cardiovascular Disease With Coronavirus Disease 2019 (COVID-19) Severity: A Meta-Analysis. *Current problems in cardiology*. 2020;45(8):100617.
3. Aksit E, Kirilmaz B, Gazi E, Aydin F. Ticagrelor Can Be an Important Agent in the Treatment of Severe COVID-19 Patients with Myocardial Infarction. *Balkan medical journal*. 2020;37(4):233-.

4. Alpalhao M, Filipe P. Inpatient care for dermatological patients during SARS-CoV-2 - a case report from Portugal. *International journal of dermatology*. 2020;59(6):e195.
5. Ambrosi P. Comment on "Epidemiological and clinical characteristics of heart transplant recipients during the 2019 coronavirus outbreak in Wuhan, China" by Ren et al. *The Journal of heart and lung transplantation : the official publication of the International Society for Heart Transplantation*. 2020.
6. Ambrosino I, Barbagelata E, Ortona E, Ruggieri A, Massiah G, Giannico OV, et al. Gender differences in patients with COVID-19: a narrative review. *Monaldi archives for chest disease = Archivio Monaldi per le malattie del torace*. 2020;90(2).
7. Andre N, Rouger-Gaudichon J, Brethon B, Phulpin A, Thebault E, Pertuisel S, et al. COVID-19 in pediatric oncology from French pediatric oncology and hematology centers: High risk of severe forms? *Pediatric blood & cancer*. 2020;67(7):e28392.
8. Andrew M, Searle SD, McElhaney JE, McNeil SA, Clarke B, Rockwood K, et al. COVID-19, frailty and long-term care: Implications for policy and practice. *Journal of infection in developing countries*. 2020;14(5):428-32.
9. Anonymous. Registries Offer Insights on COVID-19-Cancer Connection. *Cancer discovery*. 2020.
10. Anonymous. Clinical characteristics of 113 deceased patients with coronavirus disease 2019: retrospective study. *BMJ (Clinical research ed)*. 2020;368:m1295.
11. Anonymous. Clinical findings in a group of patients infected with the 2019 novel coronavirus (SARS-Cov-2) outside of Wuhan, China: retrospective case series. *BMJ (Clinical research ed)*. 2020;368:m792.
12. Anugwom CM, Aby ES, Debes JD. Inverse association between chronic hepatitis B infection and COVID-19: immune-exhaustion or coincidence? *Clinical infectious diseases : an official publication of the Infectious Diseases Society of America*. 2020.
13. Arachchilage DRJ, Laffan M. Abnormal coagulation parameters are associated with poor prognosis in patients with novel coronavirus pneumonia. *Journal of thrombosis and haemostasis : JTH*. 2020;18(5):1233-4.
14. Archie SR, Cucullo L. Cerebrovascular and Neurological Dysfunction under the Threat of COVID-19: Is There a Comorbid Role for Smoking and Vaping? *International journal of molecular sciences*. 2020;21(11).
15. Arnold C. Shielded from harm. *New scientist (1971)*. 2020;246(3281):28-33.
16. Aydemir D, Ulusu NN. Is glucose-6-phosphate dehydrogenase enzyme deficiency a factor in Coronavirus-19 (COVID-19) infections and deaths? *Pathogens and global health*. 2020;114(3):109-10.
17. Baracchini C, Pieroni A, Kneihsl M, Azevedo E, Diomedi M, Pascazio L, et al. Practice recommendations for the neurovascular ultrasound investigations of acute stroke patients in the setting of COVID-19 pandemic: an expert consensus from the European Society of Neurosonology and Cerebral Hemodynamics. *European journal of neurology*. 2020.

18. Barbieri L, Talavera Urquijo E, Parise P, Nilsson M, Reynolds JV, Rosati R. Esophageal oncologic surgery in SARS-CoV-2 (COVID-19) emergency. *Diseases of the esophagus : official journal of the International Society for Diseases of the Esophagus*. 2020;33(5).
19. Barchetta I, Cavallo MG, Baroni MG. COVID-19 and diabetes: Is this association driven by the DPP4 receptor? Potential clinical and therapeutic implications. *Diabetes research and clinical practice*. 2020;163:108165.
20. Bartsch SM, Ferguson MC, McKinnell JA, O'Shea KJ, Wedlock PT, Siegmund SS, et al. The Potential Health Care Costs And Resource Use Associated With COVID-19 In The United States. *Health affairs (Project Hope)*. 2020;39(6):927-35.
21. Bhidayasiri R, Virameteekul S, Kim J-M, Pal PK, Chung S-J. COVID-19: An Early Review of Its Global Impact and Considerations for Parkinson's Disease Patient Care. *Journal of movement disorders*. 2020;13(2):105-14.
22. Bombardini T, Picano E. Angiotensin-Converting Enzyme 2 as the Molecular Bridge Between Epidemiologic and Clinical Features of COVID-19. *The Canadian journal of cardiology*. 2020;36(5):784.e1-e2.
23. Bonow RO, Fonarow GC, O'Gara PT, Yancy CW. Association of Coronavirus Disease 2019 (COVID-19) With Myocardial Injury and Mortality. *JAMA cardiology*. 2020.
24. Bornstein SR, Dalan R, Hopkins D, Mingrone G, Boehm BO. Endocrine and metabolic link to coronavirus infection. *Nature reviews Endocrinology*. 2020;16(6):297-8.
25. Bradbury RS, Piedrafita D, Greenhill A, Mahanty S. Will helminth co-infection modulate COVID-19 severity in endemic regions? *Nature reviews Immunology*. 2020;20(6):342.
26. Brunetti O, Derakhshani A, Baradaran B, Galvano A, Russo A, Silvestris N. COVID-19 Infection in Cancer Patients: How Can Oncologists Deal With These Patients? *Frontiers in oncology*. 2020;10:734.
27. Cafarotti S. Severe Acute Respiratory Syndrome-Coronavirus-2 Infection and Patients With Lung Cancer: The Potential Role of Interleukin-17 Target Therapy. *Journal of thoracic oncology : official publication of the International Association for the Study of Lung Cancer*. 2020.
28. Calvo C, Lopez-Hortelano MG, Vicente JCdC, Martinez JLV, Grupo de trabajo de la Asociacion Espanola de Pediatria para el brote de infeccion por Coronavirus cceMdS. Recommendations on the clinical management of the COVID-19 infection by the <> SARS-CoV2. Spanish Paediatric Association working group. *Anales de pediatria*. 2020.
29. Carbillon L, Benbara A, Boujenah J. Clinical course of COVID-19 in patients with systemic lupus erythematosus under long-term treatment with hydroxychloroquine. *Annals of the rheumatic diseases*. 2020.
30. Castagnoli R, Votto M, Licari A, Brambilla I, Bruno R, Perlini S, et al. Severe Acute Respiratory Syndrome Coronavirus 2 (SARS-CoV-2) Infection in Children and Adolescents: A Systematic Review. *JAMA pediatrics*. 2020.

31. Castro-Rodriguez JA, Forno E. Asthma and COVID-19 in children - a systematic review and call for data. medRxiv : the preprint server for health sciences. 2020.
32. Ceriello A, De Nigris V, Prattichizzo F. Why is hyperglycemia worsening COVID-19 and its prognosis? Diabetes, obesity & metabolism. 2020.
33. Chaturvedi R, Gabriel RA. COVID-19 Healthcare Delivery Impact on African Americans. Disaster medicine and public health preparedness. 2020;1-8.
34. Chen J, Lu H, Melino G, Boccia S, Piacentini M, Ricciardi W, et al. COVID-19 infection: the China and Italy perspectives. Cell death & disease. 2020;11(6):438.
35. Chidini G, Villa C, Calderini E, Marchisio P, De Luca D. SARS-CoV-2 Infection in a Pediatric Department in Milan: A Logistic Rather Than a Clinical Emergency. The Pediatric infectious disease journal. 2020;39(6):e79-e80.
36. Chou R, Dana T, Buckley DI, Selph S, Fu R, Totten AM. Update Alert: Epidemiology of and Risk Factors for Coronavirus Infection in Health Care Workers. Annals of internal medicine. 2020.
37. Cinti S, Graciotti L, Giordano A, Valerio A, Nisoli E. COVID-19 and fat embolism: a hypothesis to explain the severe clinical outcome in people with obesity. International journal of obesity (2005). 2020.
38. Cole SA, Laviada-Molina HA, Serres-Perales JM, Rodriguez-Ayala E, Bastarrachea RA. The COVID-19 Pandemic during the Time of the Diabetes Pandemic: Likely Fraternal Twins? Pathogens (Basel, Switzerland). 2020;9(5).
39. Colombo C, Burgel P-R, Gartner S, van Koningsbruggen-Rietschel S, Naehrlich L, Sermet-Gaudelus I, et al. Impact of COVID-19 on people with cystic fibrosis. The Lancet Respiratory medicine. 2020;8(5):e35-e6.
40. Cook DJ, Marshall JC, Fowler RA. Critical Illness in Patients With COVID-19: Mounting an Effective Clinical and Research Response. JAMA. 2020.
41. Coppell KJ, Hall RM, Downie M, Fraser SK, Garrett M, Jefferies CA, et al. Diabetes and COVID-19-the meeting of two pandemics: what are the concerns? The New Zealand medical journal. 2020;133(1514):85-7.
42. Costa L, Tasso M, Scotti N, Mostacciuolo E, Girolimetto N, Foglia F, et al. Telerheumatology in COVID-19 era: a study from a psoriatic arthritis cohort. Annals of the rheumatic diseases. 2020.
43. Cruz AT, Zeichner SL. COVID-19 in Children: Initial Characterization of the Pediatric Disease. Pediatrics. 2020.
44. Daccord C, Touilloux B, Von Garnier C. [Asthma and COPD management during the COVID-19 pandemic]. Prise en charge de l'asthme et de la BPCO en situation de pandémie de COVID-19. 2020;16(692):933-8.
45. De Felice F, Polimeni A, Tombolini V. The impact of Coronavirus (COVID-19) on head and neck cancer patients' care. Radiotherapy and oncology : journal of the European Society for Therapeutic Radiology and Oncology. 2020;147:84-5.

46. Delanghe JR, De Buyzere ML, Speeckaert MM. C3 and ACE1 polymorphisms are more important confounders in the spread and outcome of COVID-19 in comparison with ABO polymorphism. *European journal of preventive cardiology*. 2020:2047487320931305.
47. Di Lorenzo G, Di Troilo R. Coronavirus Disease (COVID-19) in Italy: Analysis of Risk Factors and Proposed Remedial Measures. *Frontiers in medicine*. 2020;7:140.
48. Di Stadio A, Ricci G, Greco A, de Vincentiis M, Ralli M. Mortality rate and gender differences in COVID-19 patients dying in Italy: A comparison with other countries. *European review for medical and pharmacological sciences*. 2020;24(8):4066-7.
49. Dietz W, Santos-Burgoa C. Obesity and its Implications for COVID-19 Mortality. *Obesity (Silver Spring, Md)*. 2020;28(6):1005.
50. Emparan JPO, Sardi-Correa C, López-Ulloa JA, Viteri-Soria J, Penniecook JA, Jimenez-Román J, et al. COVID-19 and the eye: how much do we really know? A best evidence review. *Arq Bras Oftalmol*. 2020;83(3):250-61.
51. Extance A. Covid-19 and long term conditions: what if you have cancer, diabetes, or chronic kidney disease? *BMJ (Clinical research ed)*. 2020;368:m1174.
52. Faconti L, Chowienczyk PJ, Shah AM. Cardiovascular disease, heart failure and COVID-19. *Journal of the renin-angiotensin-aldosterone system : JRAAS*. 2020;21(2):1470320320926903.
53. Fahd Al-Muhanna A. COVID-19: Impact and challenges at breast imaging unit. *The breast journal*. 2020.
54. Fan BE, Chong VCL, Chan SSW, Lim GH, Lim KGE, Tan GB, et al. Hematologic parameters in patients with COVID-19 infection. *American journal of hematology*. 2020;95(6):E131-E4.
55. Fan J, Wang H, Ye G, Cao X, Xu X, Tan W, et al. Low-density lipoprotein is a potential predictor of poor prognosis in patients with coronavirus disease 2019. *Metabolism: clinical and experimental*. 2020:154243.
56. Fruhbeck G, Baker JL, Busetto L, Dicker D, Goossens GH, Halford JCG, et al. European Association for the Study of Obesity Position Statement on the Global COVID-19 Pandemic. *Obesity facts*. 2020;13(2):292-6.
57. Gabutti G, d'Anchera E, Sandri F, Savio M, Stefanati A. Coronavirus: Update Related to the Current Outbreak of COVID-19. *Infectious diseases and therapy*. 2020.
58. George PM, Wells AU, Jenkins RG. Pulmonary fibrosis and COVID-19: the potential role for antifibrotic therapy. *The Lancet Respiratory medicine*. 2020.
59. Giannakoulis VG, Papoutsis E, Siempos II. Effect of Cancer on Clinical Outcomes of Patients With COVID-19: A Meta-Analysis of Patient Data. *JCO global oncology*. 2020;6:799-808.
60. Golemi Minga I, Golemi L, Tafur A, Pursnani A. The Novel Coronavirus Disease (COVID-19) and Its Impact on Cardiovascular Disease. *Cardiology in review*. 2020;28(4):163-76.

61. Goyal P, Choi JJ, Pinheiro LC, Schenck EJ, Chen R, Jabri A, et al. Clinical Characteristics of Covid-19 in New York City. *The New England journal of medicine*. 2020;382(24):2372-4.
62. Gracia-Ramos AE. Is the ACE2 Overexpression a Risk Factor for COVID-19 Infection? *Archives of medical research*. 2020;51(4):345-6.
63. Grandi G, Facchinetti F, Bitzer J. The gendered impact of coronavirus disease (COVID-19): do estrogens play a role? *The European journal of contraception & reproductive health care : the official journal of the European Society of Contraception*. 2020:1-2.
64. Griffin S. Covid-19: "Staggering number" of extra deaths in community is not explained by covid-19. *BMJ (Clinical research ed)*. 2020;369:m1931.
65. Hamed E, Abd Elhamid M, Alemrayat B. Suspected cases of COVID-19: study protocol for reporting characteristics and the outcomes. *Family medicine and community health*. 2020;8(2).
66. Hanff TC, Harhay MO, Brown TS, Cohen JB, Mohareb AM. Is There an Association Between COVID-19 Mortality and the Renin-Angiotensin System—a Call for Epidemiologic Investigations. *Clinical infectious diseases : an official publication of the Infectious Diseases Society of America*. 2020.
67. Henry BM, Lippi G. Chronic kidney disease is associated with severe coronavirus disease 2019 (COVID-19) infection. *International urology and nephrology*. 2020;52(6):1193-4.
68. Hernandez-Huerta D, Alonso-Sanchez EB, Carrajo-Garcia CA, Montes-Rodriguez JM. The impact of COVID-19 on acute psychiatric inpatient unit. *Psychiatry research*. 2020;290:113107.
69. Huang G, Kovalic AJ, Graber CJ. Prognostic Value of Leukocytosis and Lymphopenia for Coronavirus Disease Severity. *Emerging infectious diseases*. 2020;26(8).
70. Huang I, Pranata R. Lymphopenia in severe coronavirus disease-2019 (COVID-19): systematic review and meta-analysis. *Journal of intensive care*. 2020;8:36.
71. Iacobucci G. Covid-19: Care home deaths in England and Wales double in four weeks. *BMJ (Clinical research ed)*. 2020;369:m1612.
72. Ingravallo F. Death in the era of the COVID-19 pandemic. *The Lancet Public health*. 2020;5(5):e258.
73. Ji Y, Ma Z, Peppelenbosch MP, Pan Q. Potential association between COVID-19 mortality and health-care resource availability. *The Lancet Global health*. 2020;8(4):e480.
74. Jj S, NA, E G. Active smoking and severity of coronavirus disease 2019 (COVID-19): Differences in measurement of variables could cause errors in the results. *European journal of internal medicine*. 2020.
75. Katulanda P, Dissanayake HA, Ranathunga I, Ratnasamy V, Wijewickrama PSA, Yogendranathan N, et al. Prevention and management of COVID-19 among patients with diabetes: an appraisal of the literature. *Diabetologia*. 2020:1-13.



76. Khalatbari-Soltani S, Cumming RG, Delpierre C, Kelly-Irving M. Importance of collecting data on socioeconomic determinants from the early stage of the COVID-19 outbreak onwards. *Journal of epidemiology and community health*. 2020.
77. Khan S, Jun L, Nawsherwan N, Siddique R, Li Y, Han G, et al. Association of COVID-19 infection with pregnancy outcomes in healthcare workers and general women. *Clinical microbiology and infection : the official publication of the European Society of Clinical Microbiology and Infectious Diseases*. 2020;26(6):788-90.
78. Khan S, Peng L, Siddique R, Nabi G, Nawsherwan N, Xue M, et al. Impact of COVID-19 infection on pregnancy outcomes and the risk of maternal-to-neonatal intrapartum transmission of COVID-19 during natural birth. *Infection control and hospital epidemiology*. 2020;41(6):1-3.
79. Khot WY, Nadkar MY. The 2019 Novel Coronavirus Outbreak - A Global Threat. *The Journal of the Association of Physicians of India*. 2020;68(3):67-71.
80. Kim DH, Choe YJ, Jeong JY. Understanding and Interpretation of Case Fatality Rate of Coronavirus Disease 2019. *Journal of Korean medical science*. 2020;35(12):e137.
81. Kirby T. Efforts escalate to protect homeless people from COVID-19 in UK. *The Lancet Respiratory medicine*. 2020;8(5):447-9.
82. Klonoff DC, Umpierrez GE. Letter to the Editor: COVID-19 in patients with diabetes: Risk factors that increase morbidity. *Metabolism: clinical and experimental*. 2020;108:154224.
83. Knight A. Letter to the Editor about the Article "Excess Mortality Estimation During the COVID-19 Pandemic: Preliminary Data from Portugal <https://doi.org/10.20344/amp.13928>". *Acta medica portuguesa*. 2020;33(6):446-7.
84. Kollias A, Kyriakoulis KG, Dimakakos E, Poulakou G, Stergiou GS, Syrigos K. Thromboembolic risk and anticoagulant therapy in COVID-19 patients: emerging evidence and call for action. *British journal of haematology*. 2020;189(5):846-7.
85. Konig MF, Gianfrancesco M, Yazdany J, Robinson PC. Patients with systemic lupus erythematosus using hydroxychloroquine or chloroquine develop severe COVID-19 at similar frequency as patients not on antimalarials: need to explore antithrombotic benefits for COVID-19 coagulopathy. Response to: 'Clinical course of COVID-19 in patients with systemic lupus erythematosus under long-term treatment with hydroxychloroquine' by Carbillon et al. *Annals of the rheumatic diseases*. 2020.
86. Kosinski C, Zanchi A, Wojtuszczyzn A. [Diabetes and COVID-19 infection]. *Diabete et infection a COVID-19*. 2020;16(692):939-43.
87. Kreutz R, Algharably EAE-H, Azizi M, Dobrowolski P, Guzik T, Januszewicz A, et al. Hypertension, the renin-angiotensin system, and the risk of lower respiratory tract infections and lung injury: implications for COVID-19. *Cardiovascular research*. 2020.
88. Kulkarni RK, Kinikar AA, Chandanwale A. Impact of COVID-19 on Children and Pediatricians. *Indian pediatrics*. 2020;57(5):480-1.
89. Kulkarni S, Jenner BL, Wilkinson I. COVID-19 and hypertension. *Journal of the renin-angiotensin-aldosterone system : JRAAS*. 2020;21(2):1470320320927851.

90. Lapolla P, Mingoli A, Lee R. Deaths from COVID-19 in healthcare workers in Italy-What can we learn? *Infection control and hospital epidemiology*. 2020:1-2.
91. Laster Pirtle WN. Racial Capitalism: A Fundamental Cause of Novel Coronavirus (COVID-19) Pandemic Inequities in the United States. *Health education & behavior : the official publication of the Society for Public Health Education*. 2020:1090198120922942.
92. Lee H, Miller VJ. The Disproportionate Impact of COVID-19 on Minority Groups: A Social Justice Concern. *Journal of gerontological social work*. 2020:1-5.
93. Lee PI, Hu YL, Chen PY, Huang YC, Hsueh PR. Are children less susceptible to COVID-19? *Journal of microbiology, immunology, and infection = Wei mian yu gan ran za zhi*. 2020.
94. Lee YJ. The Impact of the COVID-19 Pandemic on Vulnerable Older Adults in the United States. *Journal of gerontological social work*. 2020:1-6.
95. Leung JM, Yang CX, Sin DD. Reply to: "Current smoking is not associated with COVID-19". *The European respiratory journal*. 2020;55(6).
96. Liguoro I, Pilotto C, Bonanni M, Ferrari ME, Pusiol A, Nocerino A, et al. SARS-COV-2 infection in children and newborns: a systematic review. *European journal of pediatrics*. 2020.
97. Lillicrap D. Disseminated intravascular coagulation in patients with 2019-nCoV pneumonia. *Journal of thrombosis and haemostasis : JTH*. 2020;18(4):786-7.
98. Lippi G, Favaloro EJ. D-dimer is Associated with Severity of Coronavirus Disease 2019: A Pooled Analysis. *Thrombosis and haemostasis*. 2020;120(5):876-8.
99. Lippi G, Mattiuzzi C. Hemoglobin value may be decreased in patients with severe coronavirus disease 2019. *Hematology, transfusion and cell therapy*. 2020;42(2):116-7.
100. Lippi G, Wong J, Henry BM. Myalgia may not be associated with severity of coronavirus disease 2019 (COVID-19). *World journal of emergency medicine*. 2020;11(3):193-4.
101. Liu Y, Chen H, Tang K, Guo Y. Clinical manifestations and outcome of SARS-CoV-2 infection during pregnancy. *The Journal of infection*. 2020.
102. Liu Z, Long W, Tu M, Chen S, Huang Y, Wang S, et al. Lymphocyte subset (CD4+, CD8+) counts reflect the severity of infection and predict the clinical outcomes in patients with COVID-19. *The Journal of infection*. 2020.
103. Lu X, Zhang L, Du H, Zhang J, Li YY, Qu J, et al. SARS-CoV-2 Infection in Children. *The New England journal of medicine*. 2020;382(17):1663-5.
104. Madjid M, Safavi-Naeini P, Solomon SD, Vardeny O. Potential Effects of Coronaviruses on the Cardiovascular System: A Review. *JAMA cardiology*. 2020.
105. Magrone T, Magrone M, Jirillo E. Focus on Receptors for Coronaviruses with Special Reference to Angiotensin-converting Enzyme 2 as a Potential Drug Target - A Perspective. *Endocrine, metabolic & immune disorders drug targets*. 2020.
106. Mahase E. Covid-19: death rate is 0.66% and increases with age, study estimates. *BMJ (Clinical research ed)*. 2020;369:m1327.

107. Malard F, Mohty M. Management of patients with multiple myeloma during the COVID-19 pandemic. *The Lancet Haematology*. 2020;7(6):e435-e7.
108. Mansur JL. Letter: low population mortality from COVID-19 in countries south of latitude 35 degrees North supports vitamin D as a factor determining severity. *Alimentary pharmacology & therapeutics*. 2020.
109. Marongiu F, Grandone E, Barcellona D. Pulmonary thrombosis in 2019-nCoV pneumonia? *Journal of thrombosis and haemostasis : JTH*. 2020;18(6):1511-3.
110. McGonagle D, Plein S, O'Donnell JS, Sharif K, Bridgewood C. Increased cardiovascular mortality in African Americans with COVID-19. *The Lancet Respiratory medicine*. 2020.
111. McSharry D, Malhotra A. Potential influences of obstructive sleep apnea and obesity on COVID-19 severity. *Journal of clinical sleep medicine : JCSM : official publication of the American Academy of Sleep Medicine*. 2020.
112. Memtsoudis SG, Ivascu NS, Pryor KO, Goldstein PA. Obesity as a risk factor for poor outcome in COVID-19-induced lung injury: the potential role of undiagnosed obstructive sleep apnoea. *British journal of anaesthesia*. 2020.
113. Meo SA, Alhowikan AM, Al-Khlaiwi T, Meo IM, Halepoto DM, Iqbal M, et al. Novel coronavirus 2019-nCoV: prevalence, biological and clinical characteristics comparison with SARS-CoV and MERS-CoV. *European review for medical and pharmacological sciences*. 2020;24(4):2012-9.
114. Miller R, Englund K. Transmission and risk factors of OF COVID-19. *Cleveland Clinic journal of medicine*. 2020.
115. Mills JP, Kaye KS, Mody L. COVID-19 in older adults: clinical, psychosocial, and public health considerations. *JCI insight*. 2020;5(10).
116. Mueller AL, McNamara MS, Sinclair DA. Why does COVID-19 disproportionately affect older people? *Aging*. 2020;12(10):9959-81.
117. Muhidin S, Behboodi Moghadam Z, Vizheh M. Analysis of Maternal Coronavirus Infections and Neonates Born to Mothers with 2019-nCoV; a Systematic Review. *Archives of academic emergency medicine*. 2020;8(1):e49.
118. Muurlink OT, Taylor-Robinson AW. COVID-19: Cultural Predictors of Gender Differences in Global Prevalence Patterns. *Frontiers in public health*. 2020;8:174.
119. Nguyen A, David JK, Maden SK, Wood MA, Weeder BR, Nellore A, et al. Human leukocyte antigen susceptibility map for SARS-CoV-2. *Journal of virology*. 2020.
120. Nikpour M, Teh B, Wicks IP, Pellegrini M. Correspondence regarding research letter to the editor by Mathian et al, 'Clinical course of coronavirus disease 2019 (COVID-19) in a series of 17 patients with systemic lupus under long-term treatment with hydroxychloroquine'. *Annals of the rheumatic diseases*. 2020.
121. Osman MS, van Eeden C, Cohen Tervaert JW. Fatal COVID-19 infections: Is NK cell dysfunction a link with autoimmune HLH? *Autoimmunity reviews*. 2020;19(7):102561.

122. Pal R. COVID-19, hypothalamo-pituitary-adrenal axis and clinical implications. *Endocrine*. 2020;68(2):251-2.
123. Palmieri C, Palmer D, Openshaw PJ, Baille JK, Semple MG, Turtle L. Cancer datasets and the SARS-CoV-2 pandemic: establishing principles for collaboration. *ESMO open*. 2020;5(3).
124. Pantos C, Tseti I, Mourouzis I. Use of triiodothyronine to treat critically ill COVID-19 patients: a new clinical trial. *Critical care (London, England)*. 2020;24(1):209.
125. Papa SM, Brundin P, Fung VSC, Kang UJ, Burn DJ, Colosimo C, et al. Impact of the COVID-19 Pandemic on Parkinson's Disease and Movement Disorders. *Movement disorders clinical practice*. 2020;7(4):357-60.
126. Patanavanich R, Glantz SA. Smoking is Associated with COVID-19 Progression: A Meta-Analysis. *medRxiv : the preprint server for health sciences*. 2020.
127. Pawlotsky J-M. COVID-19 and the liver-related deaths to come. *Nature reviews Gastroenterology & hepatology*. 2020.
128. Pitocco D, Tartaglione L, Viti L, Di Leo M, Pontecorvi A, Caputo S. SARS-CoV-2 and DPP4 inhibition: Is it time to pray for Janus Bifrons? *Diabetes research and clinical practice*. 2020;163:108162.
129. Porcheddu R, Serra C, Kelvin D, Kelvin N, Rubino S. Similarity in Case Fatality Rates (CFR) of COVID-19/SARS-COV-2 in Italy and China. *Journal of infection in developing countries*. 2020;14(2):125-8.
130. Post A, Dullaart RPF, Bakker SJL. Is low sodium intake a risk factor for severe and fatal COVID-19 infection? *European journal of internal medicine*. 2020;75:109.
131. Poston JT, Patel BK, Davis AM. Management of Critically Ill Adults With COVID-19. *JAMA*. 2020.
132. Preskorn SH. The 5% of the Population at High Risk for Severe COVID-19 Infection Is Identifiable and Needs to Be Taken Into Account When Reopening the Economy. *Journal of psychiatric practice*. 2020;26(3):219-27.
133. Printza A, Constantinidis J. The role of self-reported smell and taste disorders in suspected COVID-19. *Eur Arch Otorhinolaryngol*. 2020:1-6.
134. Ramasamy R, Milne K, Bell D, Stoneham S, Chevassut T. Molecular mechanisms for thrombosis risk in Black people: a role in excess mortality from COVID-19. *British journal of haematology*. 2020.
135. Raymond E, Thieblemont C, Alran S, Faivre S. Impact of the COVID-19 Outbreak on the Management of Patients with Cancer. *Targeted oncology*. 2020;15(3):249-59.
136. Rhodes JM, Subramanian S, Laird E, Kenny RA. Letter: low population mortality from COVID-19 in countries south of latitude 35degree North supports vitamin D as a factor determining severity-authors' reply. *Alimentary pharmacology & therapeutics*. 2020.

137. Rocha JC, Calhau C, MacDonald A. Reply to Jakovac; Severity of COVID-19 infection in patients with phenylketonuria: is vitamin D status protective? *American journal of physiology Endocrinology and metabolism*. 2020;318(6):E890-E1.
138. Roncon L, Zuin M, Zoncin P. Age-adjusted D-dimer cut-off levels to rule out venous thromboembolism in COVID-19 patients. *Thrombosis research*. 2020;190:102.
139. Roncon L, Zuin M, Zuliani G, Rigatelli G. Patients with arterial hypertension and COVID-19 are at higher risk of ICU admission. *British journal of anaesthesia*. 2020.
140. Rosen RJ. Thrombotic complications in critically ill patients with COVID 19. *Thrombosis research*. 2020;191:56.
141. Rossato M, Russo L, Mazzocut S, Di Vincenzo A, Fioretto P, Vettor R. Current smoking is not associated with COVID-19. *The European respiratory journal*. 2020;55(6).
142. Salemi JL, Menard J, Pathak EB. Estimating severe and critical illness in children with COVID-19. *Early human development*. 2020;144:105052.
143. Sattar N, McInnes IB, McMurray JJV. Obesity a Risk Factor for Severe COVID-19 Infection: Multiple Potential Mechanisms. *Circulation*. 2020.
144. Schwartz DA. The Effects of Pregnancy on Women with COVID-19: Maternal and Infant Outcomes. *Clinical infectious diseases : an official publication of the Infectious Diseases Society of America*. 2020.
145. Selvan ME. Risk factors for death from COVID-19. *Nature reviews Immunology*. 2020.
146. Senni M. COVID-19 experience in Bergamo, Italy. *European heart journal*. 2020;41(19):1783-4.
147. Shah GH, Shankar P, Schwind JS, Sittaramane V. The Detrimental Impact of the COVID-19 Crisis on Health Equity and Social Determinants of Health. *Journal of public health management and practice : JPHMP*. 2020;26(4):317-9.
148. Shah M, Sachdeva M, Dodiuk-Gad RP. The impact of hydroxychloroquine shortages on patients with dermatological conditions during COVID-19 pandemic. *Dermatologic therapy*. 2020:e13524.
149. Sharma G, Volgman AS, Michos ED. Sex Differences in Mortality from COVID-19 Pandemic: Are Men Vulnerable and Women Protected? *JACC Case reports*. 2020.
150. Sinha IP, Harwood R, Semple MG, Hawcutt DB, Thursfield R, Narayan O, et al. COVID-19 infection in children. *The Lancet Respiratory medicine*. 2020;8(5):446-7.
151. Skarstein Kolberg E. ACE2, COVID19 and serum ACE as a possible biomarker to predict severity of disease. *Journal of clinical virology : the official publication of the Pan American Society for Clinical Virology*. 2020;126:104350.
152. Sommerstein R, Kochen MM, Messerli FH, Grani C. Coronavirus Disease 2019 (COVID-19): Do Angiotensin-Converting Enzyme Inhibitors/Angiotensin Receptor Blockers Have a Biphasic Effect? *Journal of the American Heart Association*. 2020;9(7):e016509.

153. Soraya GV, Ulhaq ZS. Interleukin-6 levels in children developing SARS-CoV-2 infection. *Pediatrics and neonatology*. 2020;61(3):253-4.
154. Souch JM, Cossman JS. A Commentary on Rural-Urban Disparities in COVID-19 Testing Rates per 100,000 and Risk Factors. *The Journal of rural health : official journal of the American Rural Health Association and the National Rural Health Care Association*. 2020.
155. Stafford N. Covid-19: Why Germany's case fatality rate seems so low. *BMJ (Clinical research ed)*. 2020;369:m1395.
156. Sundaram M, Ravikumar N, Bansal A, Nallasamy K, Basavaraja GV, Lodha R, et al. Novel Coronavirus 2019 (2019-nCoV) Infection: Part II - Respiratory Support in the Pediatric Intensive Care Unit in Resource-limited Settings. *Indian pediatrics*. 2020;57(4):335-42.
157. Tan L, Wang Q, Zhang D, Ding J, Huang Q, Tang Y-Q, et al. Correction: Lymphopenia predicts disease severity of COVID-19: a descriptive and predictive study. *Signal transduction and targeted therapy*. 2020;5:61.
158. Tan L, Wang Q, Zhang D, Ding J, Huang Q, Tang YQ, et al. Lymphopenia predicts disease severity of COVID-19: a descriptive and predictive study. *Signal transduction and targeted therapy*. 2020;5(1):33.
159. Tapia-Orihuela RKA. Hypertension and coronavirus disease 2019 mortality. *Journal of hypertension*. 2020;38(6):1197-8.
160. Taub JW, Ge Y, Xavier AC. COVID-19 and childhood acute lymphoblastic leukemia. *Pediatric blood & cancer*. 2020;67(7):e28400.
161. Temgoua MN, Kuate LM, Ngatchou W, Sibetcheu A, Toupendi ZN, Belobo G, et al. COVID-19 pandemic: do we need systematic screening of patients with cardiovascular risk factors in Low and Middle-Income Countries (LMICs) for preventing death? *The Pan African medical journal*. 2020;35(Suppl 2):11.
162. Tolksdorf K, Buda S, Schuler E, Wieler LH, Haas W. Influenza-associated pneumonia as reference to assess seriousness of coronavirus disease (COVID-19). *Euro surveillance : bulletin Europeen sur les maladies transmissibles = European communicable disease bulletin*. 2020;25(11).
163. University Hospital BS. Amotosalen-Ultraviolet A Pathogen-Inactivated Convalescent Plasma in Addition to Best Supportive Care and Antiviral Therapy on Clinical Deterioration in Adults Presenting With Moderate to Severe COVID-19. *clinicaltrials.gov*. 2020.
164. van Nieuwkoop C. COVID-19 associated pulmonary thrombosis. *Thrombosis research*. 2020;191:151.
165. Vankadari N, Wilce JA. Emerging WuHan (COVID-19) coronavirus: glycan shield and structure prediction of spike glycoprotein and its interaction with human CD26. *Emerging microbes & infections*. 2020;9(1):601-4.
166. Vazquez JC, Redolar-Ripoll D. COVID-19 outbreak impact in Spain: A role for tobacco smoking? *Tobacco induced diseases*. 2020;18:30.

167. Venkatesulu BP, Chandrasekar VT, Girdhar P, Advani P, Sharma A, Elumalai T, et al. A systematic review and meta-analysis of cancer patients affected by a novel coronavirus. medRxiv : the preprint server for health sciences. 2020.
168. Wise J. Covid-19: Known risk factors fail to explain the increased risk of death among people from ethnic minorities. *BMJ (Clinical research ed)*. 2020;369:m1873.
169. Xu G, Yang Y, Du Y, Peng F, Hu P, Wang R, et al. Clinical Pathway for Early Diagnosis of COVID-19: Updates from Experience to Evidence-Based Practice. *Clinical reviews in allergy & immunology*. 2020.
170. Yagnik PJ, Umscheid J, Khan AW, Ali M, Bhatt P, Desai PH. Pediatric Characteristics of 2019 Novel Coronavirus: Review of Available Published Literature. *Clinical pediatrics*. 2020:9922820920017.
171. Yahya AS, Khawaja S, Chukwuma J. Association of COVID-19 With Intimate Partner Violence. *The primary care companion for CNS disorders*. 2020;22(3).
172. Yan F, Nguyen SA. Head and neck cancer: high-risk population for COVID-19. *Head & neck*. 2020;42(6):1150-2.
173. Yaya S, Yeboah H, Charles CH, Otu A, Labonte R. Ethnic and racial disparities in COVID-19-related deaths: counting the trees, hiding the forest. *BMJ global health*. 2020;5(6).
174. Zambrano LI, Fuentes-Barahona IC, Bejarano-Torres DA, Bustillo C, Gonzales G, Vallecillo-Chinchilla G, et al. A pregnant woman with COVID-19 in Central America. *Travel medicine and infectious disease*. 2020:101639.
175. Zumla A, Hui DS, Azhar EI, Memish ZA, Maeurer M. Reducing mortality from 2019-nCoV: host-directed therapies should be an option. *Lancet (London, England)*. 2020;395(10224):e35-e6.

#### **Excluded – sample size <10 (n=62)**

1. Arpali E, Akyollu B, Yelken B, Tekin S, Turkmen A, Kocak B. Case report: A kidney transplant patient with mild COVID-19. *Transplant infectious disease : an official journal of the Transplantation Society*. 2020:e13296.
2. Banerjee D, Popoola J, Shah S, Ster IC, Quan V, Phanish M. COVID-19 infection in kidney transplant recipients. *Kidney international*. 2020;97(6):1076-82.
3. Bengner M, Williams O, Siddiqui J, Sztrihla L. Intracerebral haemorrhage (ICH) and COVID-19: Clinical characteristics from a case series. *Brain, behavior, and immunity*. 2020.
4. Beyrouti R, Adams ME, Benjamin L, Cohen H, Farmer SF, Goh YY, et al. Characteristics of ischaemic stroke associated with COVID-19. *Journal of neurology, neurosurgery, and psychiatry*. 2020.
5. Bhoori S, Rossi RE, Citterio D, Mazzaferro V. COVID-19 in long-term liver transplant patients: preliminary experience from an Italian transplant centre in Lombardy. *The lancet Gastroenterology & hepatology*. 2020;5(6):532-3.

6. Blanco JL, Ambrosioni J, Garcia F, Martinez E, Soriano A, Mallolas J, et al. COVID-19 in patients with HIV: clinical case series. *The lancet HIV*. 2020;7(5):e314-e6.
7. Blondiaux E, Parisot P, Redheuil A, Tzaroukian L, Levy Y, Sileo C, et al. Cardiac MRI of Children with Multisystem Inflammatory Syndrome (MIS-C) Associated with COVID-19: Case Series. *Radiology*. 2020:202288.
8. Bossoni S, Chiesa L, Giustina A. Severe hypocalcemia in a thyroidectomized woman with Covid-19 infection. *Endocrine*. 2020;68(2):253-4.
9. Bowen JD, Brink J, Brown TR, Lucassen EB, Smoot K, Wundes A, et al. COVID-19 in MS: Initial observations from the Pacific Northwest. *Neurology(R) neuroimmunology & neuroinflammation*. 2020;7(5).
10. Chiarini M, Paghera S, Moratto D, Rossi ND, Giacomelli M, Badolato R, et al. Immunologic characterization of a immunosuppressed multiple sclerosis patient that recovered from SARS-CoV-2 infection. *Journal of neuroimmunology*. 2020;345:577282.
11. Climent FJ, Calvo C, Garcia-Guereta L, Rodriguez-Alvarez D, Buitrago NM, Perez-Martinez A. Fatal outcome of COVID-19 disease in a 5-month infant with comorbidities. *Revista espanola de cardiologia (English ed)*. 2020.
12. Codispoti CD, Bandi S, Patel P, Mahdavinia M. Clinical course of asthma in 4 cases of coronavirus disease 2019 infection. *Annals of allergy, asthma & immunology : official publication of the American College of Allergy, Asthma, & Immunology*. 2020.
13. Cozzi E, Faccioli E, Marinello S, Loy M, Congedi S, Calabrese F, et al. COVID-19 pneumonia in lung transplant recipients: report of two cases. *American journal of transplantation : official journal of the American Society of Transplantation and the American Society of Transplant Surgeons*. 2020.
14. Creel-Bulos C, Hockstein M, Amin N, Melhem S, Truong A, Sharifpour M. Acute Cor Pulmonale in Critically Ill Patients with Covid-19. *The New England journal of medicine*. 2020;382(21):e70.
15. Cui Y, Tian M, Huang D, Wang X, Huang Y, Fan L, et al. A 55-Day-Old Female Infant infected with COVID 19: presenting with pneumonia, liver injury, and heart damage. *The Journal of infectious diseases*. 2020;221(11):1775-81.
16. Dabbagh MF, Aurora L, D'Souza P, Weinmann AJ, Bhargava P, Basir MB. Cardiac Tamponade Secondary to COVID-19. *JACC Case reports*. 2020.
17. Danzi GB, Loffi M, Galeazzi G, Gherbesi E. Acute pulmonary embolism and COVID-19 pneumonia: a random association? *European heart journal*. 2020;41(19):1858.
18. Dong L, Tian J, He S, Zhu C, Wang J, Liu C, et al. Possible Vertical Transmission of SARS-CoV-2 From an Infected Mother to Her Newborn. *JAMA*. 2020:E1-E3.
19. Escher R, Breakey N, Lammle B. Severe COVID-19 infection associated with endothelial activation. *Thrombosis research*. 2020;190:62.
20. Fontana F, Alfano G, Mori G, Amurri A, Tei L, Ballestri M, et al. COVID-19 pneumonia in a kidney transplant recipient successfully treated with tocilizumab and hydroxychloroquine.



American journal of transplantation : official journal of the American Society of Transplantation and the American Society of Transplant Surgeons. 2020.

21. Garcia-Salido A, Leoz-Gordillo I, Martinez de Azagra-Garde A, Nieto-Moro M, Iglesias-Bouzas MI, Garcia-Teresa MA, et al. Children in Critical Care Due to Severe Acute Respiratory Syndrome Coronavirus 2 Infection: Experience in a Spanish Hospital. *Pediatric critical care medicine : a journal of the Society of Critical Care Medicine and the World Federation of Pediatric Intensive and Critical Care Societies*. 2020.
22. Gautier-Vargas G, Baldacini C, Benotmane I, Keller N, Perrin P, Moulin B, et al. Rapid resolution of cytokine release syndrome and favorable clinical course of severe COVID-19 in a kidney transplant recipient treated with tocilizumab. *Kidney international*. 2020.
23. Gayam V, Konala VM, Naramala S, Garlapati PR, Merghani MA, Regmi N, et al. Presenting characteristics, comorbidities, and outcomes of patients coinfectd with COVID-19 and *Mycoplasma pneumoniae* in the USA. *Journal of medical virology*. 2020.
24. Govind A, Essien S, Karthikeyan A, Fakokunde A, Janga D, Yoong W, et al. Re: Novel Coronavirus COVID-19 in late pregnancy: Outcomes of first nine cases in an inner city London hospital. *European journal of obstetrics, gynecology, and reproductive biology*. 2020.
25. Hadi A, Werge M, Kristiansen KT, Pedersen UG, Karstensen JG, Novovic S, et al. Coronavirus Disease-19 (COVID-19) associated with severe acute pancreatitis: Case report on three family members. *Pancreatology : official journal of the International Association of Pancreatology (IAP) [et al]*. 2020;20(4):665-7.
26. Hammami MB, Garibaldi B, Shah P, Liu G, Jain T, Chen P-H, et al. Clinical course of COVID-19 in a liver transplant recipient on hemodialysis and response to tocilizumab therapy: A case report. *American journal of transplantation : official journal of the American Society of Transplantation and the American Society of Transplant Surgeons*. 2020.
27. He G, Wu J, Shi J, Dai J, Gamber M, Jiang X, et al. COVID-19 in Tuberculosis patients: a report of three cases. *Journal of medical virology*. 2020.
28. Hong L, Smith N, Keerthy M, Lee-Griffith M, Garcia R, Shaman M, et al. Severe COVID-19 infection in pregnancy requiring intubation without preterm delivery: A case report. *Case reports in women's health*. 2020;27:e00217.
29. Hsu JJ, Gaynor P, Kamath M, Fan A, Al-Saffar F, Cruz D, et al. COVID-19 in a High-Risk Dual Heart and Kidney Transplant Recipient. *American journal of transplantation : official journal of the American Society of Transplantation and the American Society of Transplant Surgeons*. 2020.
30. Inciardi RM, Lupi L, Zacccone G, Italia L, Raffo M, Tomasoni D, et al. Cardiac Involvement in a Patient With Coronavirus Disease 2019 (COVID-19). *JAMA cardiology*. 2020.
31. Jasinowodolinski D, Filisbino MM, Baldi BG. COVID-19 pneumonia: a risk factor for pulmonary thromboembolism? *Jornal brasileiro de pneumologia : publicacao oficial da Sociedade Brasileira de Pneumologia e Tisiologia*. 2020;46(4):e20200168.

32. Juusela A, Nazir M, Gimovsky M. Two cases of coronavirus 2019-related cardiomyopathy in pregnancy. *American journal of obstetrics & gynecology MFM*. 2020;2(2):100113.
33. Karami P, Naghavi M, Feyzi A, Aghamohammadi M, Novin MS, Mobaien A, et al. Mortality of a pregnant patient diagnosed with COVID-19: A case report with clinical, radiological, and histopathological findings. *Travel medicine and infectious disease*. 2020:101665.
34. Kim Y, Kwon O, Paek JH, Park WY, Jin K, Hyun M, et al. Two distinct cases with COVID-19 in kidney transplant recipients. *American journal of transplantation : official journal of the American Society of Transplantation and the American Society of Transplant Surgeons*. 2020.
35. Kirienco M, Padovano B, Serafini G, Marchiano A, Gronchi A, Seregini E, et al. CT, [18F]FDG-PET/CT and clinical findings before and during early Covid-19 onset in a patient affected by vascular tumour. *European journal of nuclear medicine and molecular imaging*. 2020;47(7):1769-70.
36. Konopka KE, Wilson A, Myers JL. Postmortem Lung Findings in an Asthmatic Patient With Coronavirus Disease 2019. *Chest*. 2020.
37. Mariano RZ, Ramos MdC, Reis F. COVID-19 and pulmonary embolism: Do not forget the association! *Revista da Sociedade Brasileira de Medicina Tropical*. 2020;53:e20200234.
38. Mehta H, Ivanovic S, Cronin A, VanBrunt L, Mistry N, Miller R, et al. Novel coronavirus-related acute respiratory distress syndrome in a patient with twin pregnancy: A case report. *Case reports in women's health*. 2020:e00220.
39. Merli M, Perricone G, Lauterio A, Prosperi M, Travi G, Roselli E, et al. Reply to "Coronaviruses and immunosuppressed patients. The facts during the third epidemic". *Liver transplantation : official publication of the American Association for the Study of Liver Diseases and the International Liver Transplantation Society*. 2020.
40. Modi AR, Koval CE, Taege AJ, Modaresi Esfeh J, Eghtesad B, Menon KVN, et al. Coronavirus Disease 2019 in an Orthotopic Liver Transplant Recipient Living with Human Immunodeficiency Virus. *Transplant infectious disease : an official journal of the Transplantation Society*. 2020:e13351.
41. Monti S, Balduzzi S, Delvino P, Bellis E, Quadrelli VS, Montecucco C. Clinical course of COVID-19 in a series of patients with chronic arthritis treated with immunosuppressive targeted therapies. *Annals of the rheumatic diseases*. 2020;79(5):667-8.
42. Morlacchi LC, Rossetti V, Gigli L, Amati F, Rosso L, Aliberti S, et al. COVID-19 In Lung Transplant Recipients: A Case Series From Milan, Italy. *Transplant infectious disease : an official journal of the Transplantation Society*. 2020:e13356.
43. Ning L, Liu L, Li W, Liu H, Wang J, Yao Z, et al. Novel Coronavirus (SARS-CoV-2) Infection in A Renal Transplant Recipient: Case Report. *American journal of transplantation : official journal of the American Society of Transplantation and the American Society of Transplant Surgeons*. 2020.

44. Parasole R, Stellato P, Conter V, De Matteo A, D'Amato L, Colombini A, et al. Collateral effects of COVID-19 pandemic in pediatric hematooncology: Fatalities caused by diagnostic delay. *Pediatric blood & cancer*. 2020:e28482.
45. Park JY, Han MS, Park KU, Kim JY, Choi EH. First Pediatric Case of Coronavirus Disease 2019 in Korea. *Journal of Korean medical science*. 2020;35(11):e124.
46. Quintavalle G, Coppola A, Ruggieri A, Franca Rivolta G, Fronti E, Giangregorio F, et al. Severe bleeding in a patient with Factor XIII deficiency and COVID-19. *Haemophilia : the official journal of the World Federation of Hemophilia*. 2020.
47. Rodriguez-Cola M, Jimenez-Velasco I, Gutierrez-Henares F, Lopez-Dolado E, Gambarrutta-Malfatti C, Vargas-Baquero E, et al. Clinical features of coronavirus disease 2019 (COVID-19) in a cohort of patients with disability due to spinal cord injury. *Spinal cord series and cases*. 2020;6(1):39.
48. Sereno M, Gutierrez-Gutierrez G, Sandoval C, Falagan S, Jimenez-Gordo AM, Merino M, et al. A favorable outcome of pneumonia COVID 19 in an advanced lung cancer patient with severe neutropenia: Is immunosuppression a risk factor for SARS-COV2 infection? *Lung cancer (Amsterdam, Netherlands)*. 2020;145:213-5.
49. Sharmeen S, Elghawy A, Zarlusht F, Yao QP. COVID-19 in rheumatic disease patients on immunosuppressive agents. *Seminars in arthritis and rheumatism*. 2020;50(4):680-6.
50. Silverstein WK, Stroud L, Cleghorn GE, Leis JA. First imported case of 2019 novel coronavirus in Canada, presenting as mild pneumonia. *Lancet (London, England)*. 2020;395(10225):734.
51. Solis E, Hameed A, Brown K, Pleass H, Johnston E. Delayed emergency surgical presentation: impact of corona virus disease (COVID-19) on non-COVID patients. *ANZ journal of surgery*. 2020.
52. Stoleriu MG, Gerckens M, Hetrodt J, Heis-Neumann M, Koch I, Stacher-Priehse E, et al. Clinical course of three postoperative symptomatic Covid-19 cases in patients after lung lobectomy. *The Annals of thoracic surgery*. 2020.
53. Suess C, Hausmann R. Gross and histopathological pulmonary findings in a COVID-19 associated death during self-isolation. *Int J Legal Med*. 2020;134(4):1285-90.
54. Tantisattamo E, Reddy UG, Duong DK, Ferrey AJ, Ichii H, Dafoe DC, et al. Hyponatremia: A Possible Immuno-Neuroendocrine Interface with COVID-19 in a Kidney Transplant Recipient. *Transplant infectious disease : an official journal of the Transplantation Society*. 2020:e13355.
55. Tomelleri A, Sartorelli S, Campochiaro C, Baldissera EM, Dagna L. Impact of COVID-19 pandemic on patients with large-vessel vasculitis in Italy: a monocentric survey. *Annals of the rheumatic diseases*. 2020.
56. Trapani D, Marra A, Curigliano G. The experience on coronavirus disease 2019 and cancer from an oncology hub institution in Milan, Lombardy Region. *European journal of cancer (Oxford, England : 1990)*. 2020;132:199-206.

57. Tursi A, Papa A. Impact of anti-tnfalpha antibodies on the risk of Covid-19 and its severity in patients with inflammatory Bowel Diseases. *Journal of Crohn's & colitis*. 2020.
58. Verma A, Khorsandi SE, Dolcet A, Prachalias A, Suddle A, Heaton N, et al. Low prevalence and disease severity of COVID-19 in post liver transplant recipients - a single centre experience. *Liver international : official journal of the International Association for the Study of the Liver*. 2020.
59. Vlachodimitropoulou Koumoutsea E, Vivanti AJ, Shehata N, Benachi A, Le Gouez A, Desconclois C, et al. COVID19 and acute coagulopathy in pregnancy. *Journal of thrombosis and haemostasis : JTH*. 2020.
60. Warchol I, Debska-Kozłowska A, Karcz-Socha I, Książczyk M, Szymanska K, Lubinski A. Terra incognita: clinically suspected myocarditis in a patient with severe acute respiratory syndrome coronavirus 2 infection. *Polish archives of internal medicine*. 2020;130(5):446-8.
61. Yao L, Wang J, Zhao J. Asymptomatic novel coronavirus infection in pregnant woman in the third trimester: a case report [J/OL]. *Chin J Perinat Med*. 2020.
62. Zhao R, Wang H, Xu KJ, Sheng JF. Pregnancy with 2019 Novel Coronavirus: a case report. *Zhejiang Med J*. 2020;42:303-17.

#### **Excluded – wrong population (n=30)**

1. Auld SC, Caridi-Scheible M, Blum JM, Robichaux C, Kraft C, Jacob JT, et al. ICU and Ventilator Mortality Among Critically Ill Adults With Coronavirus Disease 2019. *Critical care medicine*. 2020.
2. Belhadjer Z, Méot M, Bajolle F, Khraiche D, Legendre A, Abakka S, et al. Acute heart failure in multisystem inflammatory syndrome in children (MIS-C) in the context of global SARS-CoV-2 pandemic. *Circulation*. 2020.
3. Bhatraju PK, Ghassemieh BJ, Nichols M, Kim R, Jerome KR, Nalla AK, et al. Covid-19 in Critically Ill Patients in the Seattle Region - Case Series. *The New England journal of medicine*. 2020;382(21):2012-22.
4. Cardoso FS, Pereira R, Germano N. Liver injury in critically ill patients with COVID-19: a case series. *Critical care (London, England)*. 2020;24(1):190.
5. Collin J, Byström E, Carnahan A, Ahrne M. Public Health Agency of Sweden's Brief Report: Pregnant and postpartum women with severe acute respiratory syndrome coronavirus 2 infection in intensive care in Sweden. *Acta Obstet Gynecol Scand*. 2020;99(7):819-22.
6. Fasano A, Cereda E, Barichella M, Cassani E, Ferri V, Zecchinelli AL, et al. COVID-19 in Parkinson's Disease Patients Living in Lombardy, Italy. *Movement disorders : official journal of the Movement Disorder Society*. 2020.
7. Fraisse M, Logre E, Pajot O, Mentec H, Plantefeve G, Contou D. Thrombotic and hemorrhagic events in critically ill COVID-19 patients: a French monocenter retrospective study. *Critical care (London, England)*. 2020;24(1):275.

8. Helms J, Kremer S, Merdji H, Clere-Jehl R, Schenck M, Kummerlen C, et al. Neurologic Features in Severe SARS-CoV-2 Infection. *The New England journal of medicine*. 2020;382(23):2268-70.
9. Kass DA, Duggal P, Cingolani O. Obesity could shift severe COVID-19 disease to younger ages. *Lancet (London, England)*. 2020;395(10236):1544-5.
10. Korean Society of Infectious D, Korea Centers for Disease C, Prevention. Analysis on 54 Mortality Cases of Coronavirus Disease 2019 in the Republic of Korea from January 19 to March 10, 2020. *Journal of Korean medical science*. 2020;35(12):e132.
11. Lee C-C, Chang JC-Y, Mao X-W, Hsu W-T, Chen S-Y, Chen Y-C, et al. Combining Procalcitonin and Rapid Multiplex Respiratory Virus Testing for Antibiotic Stewardship in Older Adult Patients With Severe Acute Respiratory Infection. *Journal of the American Medical Directors Association*. 2020;21(1):62-7.
12. Lemyze M, Courageux N, Maladobry T, Arumadura C, Pauquet P, Orfi A, et al. Implications of Obesity for the Management of Severe Coronavirus Disease 2019 Pneumonia. *Crit Care Med*. 2020.
13. Llitjos JF, Leclerc M, Chochois C, Monsallier JM, Ramakers M, Auvray M, et al. High incidence of venous thromboembolic events in anticoagulated severe COVID-19 patients. *J Thromb Haemost*. 2020;18(7):1743-6.
14. London V, McLaren R, Jr., Atallah F, Cepeda C, McCalla S, Fisher N, et al. The Relationship between Status at Presentation and Outcomes among Pregnant Women with COVID-19. *American journal of perinatology*. 2020.
15. Mahase E. Covid-19: most patients require mechanical ventilation in first 24 hours of critical care. *BMJ (Clinical research ed)*. 2020;368:m1201.
16. Marfella R, Paolisso P, Sardu C, Bergamaschi L, D'Angelo EC, Barbieri M, et al. Negative impact of hyperglycaemia on tocilizumab therapy in Covid-19 patients. *Diabetes & metabolism*. 2020.
17. Montastruc F, Romano C, Montastruc J-L, Silva S, Seguin T, Minville V, et al. Pharmacological characteristics of patients infected with SARS-Cov-2 admitted to Intensive Care Unit in South of France. *Therapie*. 2020.
18. Nahum J, Morichau-Beauchant T, Daviaud F, Echehut P, Fichet J, Maillet J-M, et al. Venous Thrombosis Among Critically Ill Patients With Coronavirus Disease 2019 (COVID-19). *JAMA network open*. 2020;3(5):e2010478.
19. Pan C, Chen L, Lu C, Zhang W, Xia J-A, Sklar MC, et al. Lung Recruitability in COVID-19-associated Acute Respiratory Distress Syndrome: A Single-Center Observational Study. *American journal of respiratory and critical care medicine*. 2020;201(10):1294-7.
20. Pavoni V, Ganesello L, Pazzi M, Stera C, Meconi T, Frigieri FC. Evaluation of coagulation function by rotation thromboelastometry in critically ill patients with severe COVID-19 pneumonia. *J Thromb Thrombolysis*. 2020:1-6.

21. Pedersen HP, Hildebrandt T, Poulsen A, Uslu B, Knudsen HH, Roed J, et al. Initial experiences from patients with COVID-19 on ventilatory support in Denmark. *Danish medical journal*. 2020;67(5).
22. Piva S, Filippini M, Turla F, Cattaneo S, Margola A, De Fulviis S, et al. Clinical presentation and initial management critically ill patients with severe acute respiratory syndrome coronavirus 2 (SARS-CoV-2) infection in Brescia, Italy. *Journal of critical care*. 2020;58:29-33.
23. Saeed U, Sellevoll HB, Young VS, Sandbaek G, Glomsaker T, Mala T. Covid-19 may present with acute abdominal pain. *The British journal of surgery*. 2020;107(7):e186-e7.
24. Sciascia S, Apra F, Baffa A, Baldovino S, Boaro D, Boero R, et al. Pilot prospective open, single-arm multicentre study on off-label use of tocilizumab in patients with severe COVID-19. *Clinical and experimental rheumatology*. 2020;38(3):529-32.
25. Spiezia L, Boscolo A, Poletto F, Cerruti L, Tiberio I, Campello E, et al. COVID-19-Related Severe Hypercoagulability in Patients Admitted to Intensive Care Unit for Acute Respiratory Failure. *Thrombosis and haemostasis*. 2020;120(6):998-1000.
26. Thomas W, Varley J, Johnston A, Symington E, Robinson M, Sheares K, et al. Thrombotic complications of patients admitted to intensive care with COVID-19 at a teaching hospital in the United Kingdom. *Thrombosis research*. 2020;191:76-7.
27. Toniati P, Piva S, Cattalini M, Garrafa E, Regola F, Castelli F, et al. Tocilizumab for the treatment of severe COVID-19 pneumonia with hyperinflammatory syndrome and acute respiratory failure: A single center study of 100 patients in Brescia, Italy. *Autoimmunity reviews*. 2020;19(7):102568.
28. Violi F, Pastori D, Pignatelli P, Cangemi R. SARS-CoV-2 and myocardial injury: a role for Nox2? *Internal and emergency medicine*. 2020.
29. Wright FL, Vogler TO, Moore EE, Moore HB, Wohlaer MV, Urban S, et al. Fibrinolysis Shutdown Correlation with Thromboembolic Events in Severe COVID-19 Infection. *J Am Coll Surg*. 2020.
30. Zangrillo A, Beretta L, Scandroglio AM, Monti G, Fominskiy E, Colombo S, et al. Characteristics, treatment, outcomes and cause of death of invasively ventilated patients with COVID-19 ARDS in Milan, Italy. *Critical care and resuscitation : journal of the Australasian Academy of Critical Care Medicine*. 2020.

#### **Excluded – other study type (n=3)**

1. Adams ML, Katz DL, Grandpre J. Population-based estimates of chronic conditions affecting risk for complications from coronavirus disease, United States. *Emerging infectious diseases*. 2020;26(8).
2. Bar S, Lecourtois A, Diouf M, Goldberg E, Bourbon C, Arnaud E, et al. The association of lung ultrasound images with COVID-19 infection in an emergency room cohort. *Anaesthesia*. 2020.

3. Smith-Ray R, Roberts EE, Littleton DE, Singh T, Sandberg T, Taitel M. Distribution of Patients at Risk for Complications Related to COVID-19 in the United States: Model Development Study. *JMIR Public Health Surveill.* 2020;6(2):e19606.

#### **Excluded – unusable at data extraction (n=9)**

1. Zhu Z, Hasegawa K, Ma B, Fujiogi M, Camargo CA, Jr., Liang L. Association of asthma and its genetic predisposition with the risk of severe COVID-19. *The Journal of allergy and clinical immunology.* 2020.
2. Targher G, Mantovani A, Byrne CD, Wang X-B, Yan H-D, Sun Q-F, et al. Detrimental effects of metabolic dysfunction-associated fatty liver disease and increased neutrophil-to-lymphocyte ratio on severity of COVID-19. *Diabetes & metabolism.* 2020.
3. Slaunwhite AK, Gan WQ, Xavier C, Zhao B, Buxton JA, Desai R. Overdose and risk factors for coronavirus disease 2019. *Drug and alcohol dependence.* 2020;212:108047.
4. Oksanen A, Kaakinen M, Latikka R, Savolainen I, Savela N, Koivula A. Regulation and Trust: 3-Month Follow-up Study on COVID-19 Mortality in 25 European Countries. *JMIR public health and surveillance.* 2020;6(2):e19218.
5. Mahajan UV, Larkins-Pettigrew M. Racial demographics and COVID-19 confirmed cases and deaths: a correlational analysis of 2886 US counties. *Journal of public health (Oxford, England).* 2020.
6. Lieberman-Cribbin W, Rapp J, Alpert N, Tuminello S, Taioli E. The impact of asthma on mortality in COVID-19 patients. *Chest.* 2020.
7. Kim SJ, Bostwick W. Social Vulnerability and Racial Inequality in COVID-19 Deaths in Chicago. *Health education & behavior : the official publication of the Society for Public Health Education.* 2020:1090198120929677.
8. Imam Z, Odish F, Armstrong J, Elassar H, Dokter J, Langnas E, et al. Independent Correlates of Hospitalization in 2040 Patients with COVID-19 at a Large Hospital System in Michigan, United States. *Journal of general internal medicine.* 2020.
9. Ho CS, Chee CY, Ho RC. Mental Health Strategies to Combat the Psychological Impact of COVID-19 Beyond Paranoia and Panic. *Annals of the Academy of Medicine, Singapore.* 2020;49(3):1-3.

#### **Excluded – other (n=10)**

1. Balavoine J-F. Comparer la mortalite du COVID-19 et de l'influenza: tout faux? *2020;16(697):1222.*
2. Banerjee A, Pasea L, Harris S, Gonzalez-Izquierdo A, Torralbo A, Shallcross L, et al. Estimating excess 1-year mortality associated with the COVID-19 pandemic according to underlying conditions and age: a population-based cohort study. *Lancet (London, England).* 2020;395(10238):1715-25.

3. Chowdhury R, Heng K, Shawon MSR, Goh G, Okonofua D, Ochoa-Rosales C, et al. Dynamic interventions to control COVID-19 pandemic: a multivariate prediction modelling study comparing 16 worldwide countries. *European journal of epidemiology*. 2020;35(5):389-99.
4. Dehghani P, Davidson LJ, Grines CL, Nayak K, Saw J, Kaul P, et al. North American COVID-19 ST-segment elevation myocardial infarction (NACMI) registry: Rationale, design, and implications. *American heart journal*. 2020.
5. El-Kurdi B, Khatua B, Rood C, Snozek C, Cartin-Ceba R, Singh VP, et al. MORTALITY FROM COVID-19 INCREASES WITH UNSATURATED FAT, AND MAY BE REDUCED BY EARLY CALCIUM AND ALBUMIN SUPPLEMENTATION. *Gastroenterology*. 2020.
6. Li D, Croft DP, Ossip DJ, Xie Z. Are Vapers More Susceptible to COVID-19 Infection? *medRxiv : the preprint server for health sciences*. 2020.
7. Mehra MR, Desai SS, Kuy S, Henry TD, Patel AN. Cardiovascular Disease, Drug Therapy, and Mortality in Covid-19. *The New England journal of medicine*. 2020.
8. Sakiko T, Kazuo I, Shuichi K, Mayu I, Tatsuya K, Kazuyasu M, et al. Non-severe vs severe symptomatic COVID-19: 104 cases from the outbreak on the cruise ship "Diamond Princess" in Japan. *medRxiv*. 2020.
9. Testino G, Fagoonee S. Coronavirus disease 2019 outbreak: liver disease a prognostic tool? *Panminerva medica*. 2020.
10. Unger JM, Blanke CD, LeBlanc M, Hershman DL. Association of the Coronavirus Disease 2019 (COVID-19) Outbreak With Enrollment in Cancer Clinical Trials. *JAMA network open*. 2020;3(6):e2010651.



**Supplement 4. Characteristics of included studies**

| <b>Author, year;<br/>Publication date;<br/>Country;<br/>Study design;<br/>Study period &amp; follow-up</b> | <b>Enrolled cohort;<br/>Study sample;<br/>Mean age (SD), years<sup>1</sup><br/>Male, proportion</b>                                                                                                                            | <b>COVID-19<br/>diagnosis</b>                                                                          | <b>P<sup>2</sup>ROGRESS risk factors,<br/>adjusted for in multivariate<br/>regression analysis<sup>2</sup></b>                                                                                                                                                                                      | <b>Outcomes</b>         | <b>Quality rating &amp;<br/>concerns (if any)</b>                     |
|------------------------------------------------------------------------------------------------------------|--------------------------------------------------------------------------------------------------------------------------------------------------------------------------------------------------------------------------------|--------------------------------------------------------------------------------------------------------|-----------------------------------------------------------------------------------------------------------------------------------------------------------------------------------------------------------------------------------------------------------------------------------------------------|-------------------------|-----------------------------------------------------------------------|
| Azar K, 2020<br>May 21 (published)<br>USA<br>Retrospective cohort<br>Jan 1-Apr 8                           | Patients ≥18 years old who had at least one encounter at a Sutter facility (integrated health system) during the study period for suspected or confirmed COVID-19 infection<br><br>N=1,052<br><br>53 (95% CI 52-54)<br><br>49% | ICD codes or evidence in lab records (reports suspected cases but confirmed cases analyzed separately) | Pre-existing condition (asthma, cardiovascular disease, cancer, chronic pulmonary disease, congestive heart failure, type II diabetes, hypertension, depression);<br>Place of residence (homeless);<br>Race/ethnicity;<br>Sex;<br>SES (household income);<br>Age;<br>Other factors (smoking status) | Rate of hospitalization | Good;<br>No major concerns                                            |
| Bhargava A, 2020<br>May 30 (published)<br>USA<br>Retrospective cohort<br>Mar 8-Apr 8                       | Adults admitted to a tertiary care urban academic medical center with COVID-19<br><br>N=197<br><br>61 (16)<br><br>52%                                                                                                          | RT-PCR                                                                                                 | Pre-existing condition (renal disease);<br>Sex;<br>Age                                                                                                                                                                                                                                              | Severe disease          | Good;<br>No major concerns                                            |
| Bianchetti A, 2020<br>May 11 (accepted)<br>Italy<br>Retrospective cohort<br>Study period not reported      | Adults admitted to acute medical wards with COVID-19 pneumonia in Brescia<br><br>N=627<br><br>71 (13)<br><br>47%                                                                                                               | RT-PCR                                                                                                 | Pre-existing condition (dementia);<br>Sex;<br>Age                                                                                                                                                                                                                                                   | Mortality               | Fair;<br>Did not report follow-up duration or censorship for outcomes |

|                                                                                                                 |                                                                                                                                              |                |                                                                                                               |                                                                                         |                                                                                                                         |
|-----------------------------------------------------------------------------------------------------------------|----------------------------------------------------------------------------------------------------------------------------------------------|----------------|---------------------------------------------------------------------------------------------------------------|-----------------------------------------------------------------------------------------|-------------------------------------------------------------------------------------------------------------------------|
| Borobia A, 2020<br>June 4 (published)<br>Spain<br>Retrospective cohort<br>Feb 25-Apr 19;<br>Follow-up to Apr 19 | Adults $\geq 18$ years old hospitalized in wards or the ED at a university hospital with COVID-19<br>N=2,226<br>Median 61 (IQR 46-78)<br>48% | Lab-confirmed  | Pre-existing condition (not clearly specified for multivariate analysis);<br>Sex;<br>Age                      | Mortality                                                                               | Fair;<br>No follow-up and censored to patients who died or were discharged by April 19                                  |
| Busetto L, 2020<br>May 28 (accepted)<br>Italy<br>Retrospective cohort<br>Mar 14-Apr 11                          | Adults hospitalized in a medical COVID-19 ward with SARS-CoV-2 related pneumonia<br>N=92<br>71 (13)<br>62%                                   | RT-PCR         | Pre-existing condition (BMI/obesity, chronic respiratory disease, dementia, type II diabetes);<br>Sex;<br>Age | ICU admission;<br>Noninvasive ventilation or MV (composite);<br>Mortality (in-hospital) | Fair;<br>Did not report follow-up duration or censorship for outcomes                                                   |
| Cecconi M, 2020<br>May 20 (published)<br>Italy<br>Retrospective cohort<br>Feb 22-Mar 22                         | Adults $\geq 18$ years old admitted to a hospital with COVID-19<br>N=239<br>64 (14)<br>71%                                                   | Positive assay | Pre-existing condition (coronary heart disease);<br>Age                                                       | ICU admission or mortality (composite)                                                  | Fair;<br>No adjustment for sex and patients were censored as of March 25 (inadequate for patients enrolled on March 22) |
| Colaneri M, 2020<br>Apr 23 (published)<br>Italy<br>Retrospective cohort<br>Feb 21-28;<br>Follow-up to Mar 4     | Patients admitted to a hospital with COVID-19<br>N=44<br>Median 68 (IQR 29)<br>64%                                                           | RT-PCR         | Pre-existing condition (tumor);<br>Sex                                                                        | Severe disease                                                                          | Good;<br>No major concerns                                                                                              |

|                                                                                                                                |                                                                                                                                                                                                                             |               |                                                                                                                                                                                                                                                                                                                                               |                                                                              |                                                                             |
|--------------------------------------------------------------------------------------------------------------------------------|-----------------------------------------------------------------------------------------------------------------------------------------------------------------------------------------------------------------------------|---------------|-----------------------------------------------------------------------------------------------------------------------------------------------------------------------------------------------------------------------------------------------------------------------------------------------------------------------------------------------|------------------------------------------------------------------------------|-----------------------------------------------------------------------------|
| Covino M, 2020<br>May 18 (accepted)<br>Italy<br>retrospective cohort<br>Mar 1-31;<br>Follow-up at 30 days<br>from ED admission | Adults ≥80 years old admitted to ED of urban teaching hospital for suspected COVID-19<br><br>N=69<br><br>Median 84 (IQR 82-89)<br><br>54%                                                                                   | RT-PCR        | Pre-existing condition (severe dementia)                                                                                                                                                                                                                                                                                                      | Mortality                                                                    | Fair;<br>No adjustment for age or sex, or other pre-existing conditions     |
| Cummings MJ, 2020<br>May 19 (published)<br>USA<br>Prospective cohort<br>Mar 2-Apr 1;<br>Follow-up to Apr 28                    | Adults admitted to high-dependency unit (O2) or ICU (MV) of two hospitals in New York with COVID-19 and were critically ill with acute hypoxaemic respiratory failure<br><br>N=257<br><br>Median 62 (IQR 51-72)<br><br>67%  | Lab-confirmed | Pre-existing condition (chronic cardiac disease [coronary artery disease or congestive heart failure], chronic pulmonary disease [chronic obstructive pulmonary disease/interstitial lung disease], diabetes, hypertension);<br>Sex;<br>Age                                                                                                   | Mortality (in-hospital)                                                      | Good;<br>No major concerns                                                  |
| Docherty AB, 2020<br>May 15 (accepted)<br>UK<br>Prospective cohort<br>Feb 6-Apr 19;<br>Follow-up at least 2 weeks to May 3     | Children and adults admitted to 208 acute care hospitals with COVID-19 in England, Wales, and Scotland<br><br>N=20,133<br><br>Median 73 (IQR 58-82)<br><br>60%                                                              | RT-PCR        | Pre-existing condition (chronic cardiac disease, chronic pulmonary disease, asthma, CKD, DM, obesity, chronic neurological disorder, dementia, malignancy, moderate/severe liver disease, mild liver disease, chronic hematologic disease, rheumatologic disorder, HIV/AIDS, malnutrition);<br>Sex;<br>Age;<br>Other factors (smoking status) | Mortality (in-hospital)                                                      | Good;<br>No major concerns                                                  |
| D'Silva K, 2020<br>May 18 (accepted)<br>USA<br>Retrospective cohort                                                            | Patients seen at PHS who were ≥18 years of age and had a positive test result for SARS-CoV-2 by PCR clinical assay. *PHS is a large healthcare system that includes tertiary care hospitals (Massachusetts General Hospital | PCR           | Pre-existing condition (rheumatic disease)                                                                                                                                                                                                                                                                                                    | Rate of hospitalization;<br>ICU admission/ or MV (all with MV);<br>Mortality | Fair;<br>No adjustment for sex, and mortality only adjusted for age and BMI |

|                                                                                                                                    |                                                                                                                                                                                                                                              |                           |                                                                                                                                                                                                                                                                                                                   |                                             |                            |
|------------------------------------------------------------------------------------------------------------------------------------|----------------------------------------------------------------------------------------------------------------------------------------------------------------------------------------------------------------------------------------------|---------------------------|-------------------------------------------------------------------------------------------------------------------------------------------------------------------------------------------------------------------------------------------------------------------------------------------------------------------|---------------------------------------------|----------------------------|
| Mar 1-Apr 8;<br>Follow-up averaged 29 days                                                                                         | and Brigham and Women's Hospital), community hospitals and primary and specialty outpatient centres in the greater Boston<br><br>N=156<br><br>63 (15)<br><br>31%                                                                             |                           |                                                                                                                                                                                                                                                                                                                   |                                             |                            |
| El-Boghdady K, 2020<br>June 9 (accepted)<br><br>Multi-country<br><br>Prospective cohort<br><br>Mar 23-Jun 2                        | Healthcare workers from 503 hospitals in 17 countries who performed tracheal intubations, with data for new COVID-19 infection or new COVID-19 symptoms requiring self-isolation or hospitalization.<br><br>N=1,718<br><br>42 (9)<br><br>60% | Lab-confirmed or symptoms | Occupation (intubator/laryngologist vs. assistant);<br>Sex                                                                                                                                                                                                                                                        | Self-isolation/ hospitalization (composite) | Good;<br>No major concerns |
| Giacomelli A, 2020<br>May 22 (published)<br><br>Italy<br><br>Prospective cohort<br><br>Feb 21-Mar 19;<br>Follow-up to Apr 20       | Adults hospitalized at one hospital with COVID-19<br><br>N=233<br><br>Median 61 (IQR 50-72)<br><br>62%                                                                                                                                       | RT-PCR                    | Pre-existing condition (age unadjusted Charlson Comorbidity Index, obesity, anemia);<br>Sex;<br>Age                                                                                                                                                                                                               | Mortality                                   | Good;<br>No major concerns |
| Gold J, 2020<br>May 8 (published, MMWR weekly report)<br><br>USA<br><br>Prospective cohort<br><br>Mar 1-30;<br>Follow-up to Apr 28 | Adults ≥18 years old hospitalized at eight hospitals with COVID-19<br><br>N=305<br><br>Median 60 (IQR 46-69)<br><br>49%                                                                                                                      | Lab-confirmed             | Pre-existing condition (obesity, diabetes, cardiovascular disease, coronary artery disease, congenital heart disease, arrhythmia, chronic lung disease, asthma, chronic obstructive pulmonary disease, immunocompromising conditions/therapies, end-stage renal disease on dialysis, liver disease, hypertension, | MV or mortality (composite)                 | Good;<br>No major concerns |

|                                                                                                                         |                                                                                                                                          |        |                                                                                                                                                |                                                  |                                                                                                                                                            |
|-------------------------------------------------------------------------------------------------------------------------|------------------------------------------------------------------------------------------------------------------------------------------|--------|------------------------------------------------------------------------------------------------------------------------------------------------|--------------------------------------------------|------------------------------------------------------------------------------------------------------------------------------------------------------------|
|                                                                                                                         |                                                                                                                                          |        | neurologic disorder, chronic liver disease without dialysis, cancer, rheumatologic or autoimmune condition);<br>Race/ethnicity;<br>Sex;<br>Age |                                                  |                                                                                                                                                            |
| Hajifathalian K, 2020 (#163)<br>May 29 (accepted)<br>USA<br>Retrospective cohort<br>Mar 4-Apr 9;<br>Follow-up to Apr 16 | Adults ≥18 years old with and without obesity hospitalized in ED or inpatient wards with COVID-19<br><br>N=770<br><br>64 (17)<br><br>61% | RT-PCR | Pre-existing condition (obesity)                                                                                                               | ICU admission;<br>MV;<br>Mortality (in-hospital) | Fair;<br>No adjustment for sex, and 7-day follow-up inadequate for mortality                                                                               |
| Hajifathalian K, 2020 (#1154)<br>May 1 (accepted)<br>USA<br>Retrospective cohort<br>Mar 4-Apr 9                         | Adults with SARS-CoV-2<br><br>N=1,059<br><br>61 (18)<br><br>58%                                                                          | RT-PCR | Pre-existing condition (number of comorbidities);<br>Age                                                                                       | ICU admission or mortality (composite)           | Fair;<br>Unclear if adjustment for sex, and did not report follow-up duration or censorship for outcomes                                                   |
| Hamer M, 2020<br>May 23 (published)<br>UK<br>Prospective cohort<br>Mar 16-Apr 26                                        | Adults in the community<br><br>N=387,109<br><br>56 (8)<br><br>45%                                                                        | RT-PCR | Pre-existing condition (overweight, obesity);<br>Other factors (smoking status, level of alcohol consumption, level of physical activity)      | Rate of hospitalization                          | Fair;<br>One of three publications reporting on same or similar population, significant amount of missing data and data on risk factors are from 2006-2010 |
| Hur K, 2020<br>May 20 (accepted)                                                                                        | Patients hospitalized with laboratory-confirmed COVID-19 infection admitted to any of the 10                                             | RT-PCR | Pre-existing condition (obesity, diabetes, hypertension);                                                                                      | MV                                               | Good;<br>No major concerns                                                                                                                                 |

|                                                                                                                     |                                                                                                                                                                                                                                                                                                                                          |        |                                                                                                                        |                         |                                                                                                                                                                                                               |
|---------------------------------------------------------------------------------------------------------------------|------------------------------------------------------------------------------------------------------------------------------------------------------------------------------------------------------------------------------------------------------------------------------------------------------------------------------------------|--------|------------------------------------------------------------------------------------------------------------------------|-------------------------|---------------------------------------------------------------------------------------------------------------------------------------------------------------------------------------------------------------|
| USA<br>Retrospective cohort<br>Mar 1-Apr 8;<br>Follow-up to Apr 18                                                  | hospitals in the Northwestern Memorial HealthCare system spread across the Chicago metropolitan area<br><br>N=486<br><br>Median 59 (IQR 19-101)<br><br>56%                                                                                                                                                                               |        | Place of residence (suburban vs. urban hospital);<br>Race/ethnicity;<br>Sex;<br>Age;<br>Other factors (smoking status) |                         |                                                                                                                                                                                                               |
| Imam Z, 2020<br>June 4 (published)<br>USA<br>Retrospective cohort<br>Mar 1-Apr 17;<br>outcome analysis ended Apr 17 | Individuals that were hospitalized at a hospital within Beaumont Health with SARS-CoV-2 infection demonstrated by a positive RT-PCR on nasopharyngeal swab per world health organization (WHO) guidance<br><br>N=1,305<br><br>61 (16)<br><br>54%                                                                                         | RT-PCR | Pre-existing condition (Charlson Comorbidity Index >3);<br>Age                                                         | Mortality (in-hospital) | Fair;<br>Adjustment for Charlson Comorbidity Index score (>3) despite individual comorbidities being significant at univariate analysis, and some missing data for ethnicity (n=5) and smoking status (n=240) |
| Kalligeros M, 2020<br>June 12 (published)<br>USA<br>Retrospective cohort<br>Feb 17-Apr 5                            | All consecutive adult (≥18 years old) patients who had a laboratory confirmed (using a reverse transcriptase-polymerase chain reaction assay) SARS-CoV-2 infection and who were hospitalized at the Rhode Island Hospital, The Miriam Hospital, or Newport Hospital in Rhode Island<br><br>N=103<br><br>Median 60 (IQR 50-72)<br><br>61% | RT-PCR | Pre-existing condition (obesity, diabetes, hypertension, heart disease, lung disease);                                 | ICU admission;<br>MV    | Good;<br>No major concerns                                                                                                                                                                                    |
| Klang E, 2020<br>May 23 (accepted)                                                                                  | Adults hospitalized at five academic hospitals with COVID-19 with BMI information                                                                                                                                                                                                                                                        | PCR    | Pre-existing condition (obesity, diabetes, heart disease, hypertension, lung disease);<br>Race/ethnicity;              | Mortality (in-hospital) | Fair;<br>Did not report follow-up duration or censorship for outcomes, and a                                                                                                                                  |

|                                                                                                             |                                                                                                                                                                                                      |               |                                                                                                                                                                                                                                                                                                                                                                                   |                                |                                                                                                                                                            |
|-------------------------------------------------------------------------------------------------------------|------------------------------------------------------------------------------------------------------------------------------------------------------------------------------------------------------|---------------|-----------------------------------------------------------------------------------------------------------------------------------------------------------------------------------------------------------------------------------------------------------------------------------------------------------------------------------------------------------------------------------|--------------------------------|------------------------------------------------------------------------------------------------------------------------------------------------------------|
| USA<br>Retrospective cohort<br>Mar 1-May 17                                                                 | N=3,406<br>Range 34 to 84 y<br>58%                                                                                                                                                                   |               | Sex;<br>Age                                                                                                                                                                                                                                                                                                                                                                       |                                | large number of patients who were still hospitalized at time of analysis were excluded (n=1,047)                                                           |
| Lassale C, 2020<br>May 28 (accepted)<br>UK<br>Prospective cohort<br>Mar 16-Apr 26                           | Adults in the community<br>N=340,966<br>56 (8)<br>45%                                                                                                                                                | RT-PCR        | Pre-existing condition (obesity, cardiovascular disease, chronic bronchitis, ever seen a psychiatrist);<br>Place of residence (number in household);<br>Race/ethnicity;<br>Sex;<br>Education/literacy level (university degree vs. lower education);<br>SES (Townsend index);<br>Age;<br>Other factors (smoking status, level of alcohol consumption, level of physical activity) | Rate of hospitalization        | Fair;<br>One of three publications reporting on same or similar population, significant amount of missing data and data on risk factors are from 2006-2010 |
| Okoh A, 2020<br>June 10 (published)<br>USA<br>Retrospective cohort<br>Mar 10-Apr 10;<br>Follow-up to Apr 20 | Adults ≥18 years old of Black/African American or Latino/Hispanic ethnicity hospitalised at a quaternary care teaching hospital in New Jersey with COVID-19<br>N=251<br>Median 62 (IQR 49-74)<br>51% | RT-PCR        | Pre-existing condition (coronary artery disease, chronic kidney disease, hypertension, HIV);<br>Race/ethnicity;<br>Sex;<br>Age                                                                                                                                                                                                                                                    | Mortality (in-hospital)        | Good;<br>No major concerns                                                                                                                                 |
| Palaiodimos L, 2020<br>May 14 (accepted)<br>USA<br>Retrospective cohort                                     | Adults (first 200) admitted to the inpatient medicine service or the ICU of a tertiary academic institution with COVID-19<br>N=200                                                                   | Lab-confirmed | Pre-existing condition (overweight, obesity, coronary artery disease, chronic kidney disease or end-stage renal disease, chronic obstructive pulmonary disease, diabetes,                                                                                                                                                                                                         | MV;<br>Mortality (in-hospital) | Good;<br>No major concerns                                                                                                                                 |

|                                                                                                                                   |                                                                                                                                    |        |                                                                                                                                                                                                                                                                                                                                                                                                                                |                                                                        |                                                                                                                                                                                  |
|-----------------------------------------------------------------------------------------------------------------------------------|------------------------------------------------------------------------------------------------------------------------------------|--------|--------------------------------------------------------------------------------------------------------------------------------------------------------------------------------------------------------------------------------------------------------------------------------------------------------------------------------------------------------------------------------------------------------------------------------|------------------------------------------------------------------------|----------------------------------------------------------------------------------------------------------------------------------------------------------------------------------|
| Mar 9-Mar 22;<br>Follow-up 3 weeks to<br>Apr 12                                                                                   | Median 64 (IQR 50-74)<br>49%                                                                                                       |        | heart failure, hyperlipidemia,<br>obstructive sleep apnea);<br>Sex;<br>Age;<br>Other factors (smoking status)                                                                                                                                                                                                                                                                                                                  |                                                                        |                                                                                                                                                                                  |
| Patel AP, 2020<br>July 6 (published, letter)<br>UK<br>Prospective cohort<br>Mar 16-Apr 14                                         | Adults who were enrolled in a<br>national health database<br>N=418,794<br>66 (SD not reported)<br>45%                              | PCR    | Pre-existing condition (obesity,<br>chronic obstructive pulmonary<br>disease, coronary artery<br>disease, diabetes, chronic<br>kidney disease, heart failure,<br>hypertension, ischemic stroke,<br>previous pneumonia,<br>Alzheimer's or dementia);<br>Race/ethnicity;<br>Sex;<br>SES (Townsend index, average<br>income);<br>Age;<br>Other factors (smoking status)                                                           | Rate of hospitalization                                                | Fair;<br>One of three<br>publications reporting<br>on same or similar<br>population, significant<br>amount of missing data<br>and data on risk<br>factors are from 2006-<br>2010 |
| Perez-Guzman PN,<br>2020<br>April 29 (published,<br>report)<br>UK<br>retrospective cohort<br>Feb 25-Apr 5;<br>Follow-up to Apr 19 | Adults hospitalized at three<br>hospitals (with a multi-ethnic<br>catchment) with COVID-19<br>N=520<br>Median 67 (IQR 26)<br>62%   | RT-PCR | Pre-existing condition<br>(Elixhauser score, obesity,<br>diabetes, ischaemic heart,<br>hypertension, hyperlipidemia,<br>chronic heart failure, stroke,<br>asthma, chronic obstructive<br>pulmonary disease, dementia,<br>chronic kidney disease,<br>dementia, solid tumor, liver non-<br>cirrhotic, liver cirrhotic, atrial<br>fibrillation, deep vein<br>thrombosis/pulmonary<br>embolism);<br>Race/ethnicity;<br>Sex;<br>Age | Mortality (in-hospital)                                                | Good;<br>No major concerns                                                                                                                                                       |
| Petrilli CM, 2020<br>May 14 (accepted)<br>USA<br>Prospective cohort                                                               | Adults tested for SARS-CoV-2 from<br>260 outpatient office sites and 4<br>acute care hospitals<br>N=5,279<br>Median 54 (IQR 38-66) | RT-PCR | Pre-existing condition (obesity,<br>asthma or chronic obstructive<br>pulmonary disease, chronic<br>lung disease, coronary artery<br>disease, diabetes, heart failure,<br>hyperlipidemia, hypertension,<br>cancer);<br>Race/ethnicity;                                                                                                                                                                                          | Rate of hospitalization;<br>Severe disease;<br>Mortality (in-hospital) | Good;<br>No major concerns                                                                                                                                                       |



|                                                                                                                                  |                                                                                                                                                              |               |                                                                                                                                                             |                                                     |                                                                                                                                                                                         |
|----------------------------------------------------------------------------------------------------------------------------------|--------------------------------------------------------------------------------------------------------------------------------------------------------------|---------------|-------------------------------------------------------------------------------------------------------------------------------------------------------------|-----------------------------------------------------|-----------------------------------------------------------------------------------------------------------------------------------------------------------------------------------------|
| Mar 1-Apr 8;<br>Follow-up to May 5                                                                                               | 50%                                                                                                                                                          |               | Sex;<br>Age;<br>Other factors (smoking status)                                                                                                              |                                                     |                                                                                                                                                                                         |
| Piano S, 2020<br>June 11 (published)<br>Italy<br>Retrospective cohort<br>Feb 22-Apr 8                                            | Non-critically ill patients hospitalized with COVID-19 in five internal medicine COVID unit in two regions of Northern Italy<br><br>N=565<br>66 (15)<br>63%  | RT-PCR        | Pre-existing condition (liver function, Charlson Comorbidity Index);<br>Gender;<br>Age                                                                      | Transfer to ICU or mortality (composite)            | Good;<br>No major concerns                                                                                                                                                              |
| Price-Haywood EG, 2020<br>May 27 (published)<br>USA<br>Retrospective cohort<br>Mar 1-Apr 11;<br>Follow-up to May 7 for mortality | Adults attending integrated-delivery health system who tested positive for SARS-CoV-2<br><br>N=3,481<br>54 (17)<br>40%                                       | PCR           | Pre-existing condition (Charlson Comorbidity Index score, obesity);<br>Place of residence (residence in low-income area);<br>Race/ethnicity;<br>Sex;<br>Age | Rate of hospitalization;<br>Mortality (in-hospital) | Good;<br>No major concerns                                                                                                                                                              |
| Public Health England<br>June (published)<br>UK<br>Retrospective cohort<br>Mar 20-May 13                                         | Patients admitted to hospital (ward or critical care) with COVID-19<br><br>N=130,091<br>No aggregate data for age (range 2% at <20 y to 29% at ≥80 y)<br>47% | Lab-confirmed | Race/ethnicity;<br>SES (deprivation);<br>Sex;<br>Age                                                                                                        | Mortality                                           | Fair;<br>No adjustment for pre-existing condition(s), and data for risk factors are derived from a 2011 census with some missing data for sex (n=10), age (n=38), and ethnicity (2,024) |
| Shah V, 2020<br>June 11 (accepted)<br>UK                                                                                         | Haemato-oncology patients and patients without underlying haematological malignancies (first 80) admitted to the hospital with COVID-19                      | RT-PCR        | Sex;<br>Age                                                                                                                                                 | Mortality                                           | Fair;<br>Adjusted for age and sex only, and no explanation of discrepancy in cohort                                                                                                     |

|                                                                                                                  |                                                                                                                                                                                                                                                                                                                                                                                        |                                        |                                                                                                                                                                                                                                                                                                                              |                                       |                                             |
|------------------------------------------------------------------------------------------------------------------|----------------------------------------------------------------------------------------------------------------------------------------------------------------------------------------------------------------------------------------------------------------------------------------------------------------------------------------------------------------------------------------|----------------------------------------|------------------------------------------------------------------------------------------------------------------------------------------------------------------------------------------------------------------------------------------------------------------------------------------------------------------------------|---------------------------------------|---------------------------------------------|
| Retrospective cohort<br>Until April 15;<br>Follow-up of 30 days                                                  | N=1,183<br><br>Median 71 (IQR 57-82)<br><br>58%                                                                                                                                                                                                                                                                                                                                        |                                        |                                                                                                                                                                                                                                                                                                                              |                                       | sample size change during study (80 and 68) |
| Singh S, 2020 (#121)<br>June 2 (accepted)<br>USA<br>Retrospective cohort<br>Jan 20-May 26                        | Inflammatory bowel disease (IBD) patients diagnosed with COVID-19 and patients diagnosed with COVID-19 and who had no history of or documentation of a diagnosis of IBD ever were included in the non-IBD control group.<br><br>N=464<br><br>No aggregate data for age (IBD vs. non-IBD: mean 51 y [18] vs. 50 y [19])<br><br>No aggregate data for sex (IBD vs. non-IBD: 37% vs. 45%) | Lab-confirmed or ICD code for COVID-19 | Pre-existing condition (obesity, essential hypertension, chronic lower respiratory diseases [asthma and chronic obstructive pulmonary disease], diabetes, ischemic heart disease, chronic kidney disease, heart failure, cerebrovascular disease);<br>Race/ethnicity;<br>Sex;<br>Age;<br>Other factors (nicotine dependency) | Rate of hospitalization;<br>Mortality | Good;<br>No major concerns                  |
| Singh S, 2020 (#1201)<br>Apr 28 (accepted)<br>USA<br>Retrospective cohort<br>Apr 12 (search for patient records) | Patients ≥10 years old with COVID-19, with and without pre-existing liver disease, who presented to a health care organization<br><br>N=2,780<br><br>No aggregate data for age (liver disease vs. non-liver disease: mean 55 y [15] vs. 52 y [18])<br><br>38%                                                                                                                          | ICD codes per CDC guidelines           | Pre-existing condition (obesity, diabetes, hypertension, liver disease with cirrhosis, liver disease without cirrhosis);<br>Race/ethnicity;<br>Age;<br>Other factors (nicotine use)                                                                                                                                          | Rate of hospitalisation;<br>Mortality | Good;<br>No major concerns                  |
| Violi F, 2020<br>June 22 (published)<br>Italy                                                                    | Consecutively hospitalized adult (≥18 years) patients with laboratory-confirmed COVID-19 and severe acute respiratory syndrome coronavirus-2 (SARS-CoV2)-related                                                                                                                                                                                                                       | RT-PCR                                 | Pre-existing condition (heart failure);<br>Age                                                                                                                                                                                                                                                                               | Mortality (in-hospital)               | Good;<br>No major concerns                  |

|                                                                                                    |                                                                                                                                                                                                                                        |  |  |  |  |
|----------------------------------------------------------------------------------------------------|----------------------------------------------------------------------------------------------------------------------------------------------------------------------------------------------------------------------------------------|--|--|--|--|
| <p>Retrospective cohort</p> <p>Mar-Apr;<br/>Follow-up of 19 days<br/>(median, IQR: 12–27 days)</p> | <p>pneumonia, requiring or not mechanical ventilation.</p> <p>N=319</p> <p>No aggregate data for age (survivors vs. non-survivors: mean 66 y vs. 77 y)</p> <p>No aggregate data for sex (survivors vs. non-survivors: 58% vs. 70%)</p> |  |  |  |  |
|----------------------------------------------------------------------------------------------------|----------------------------------------------------------------------------------------------------------------------------------------------------------------------------------------------------------------------------------------|--|--|--|--|

<sup>1</sup> values for age are mean (SD), unless otherwise denoted

<sup>2</sup> risk factors adjusted for in multivariate analysis may differ for outcome(s) reported within a study

CDC: Centers for Disease Control and Prevention; COVID-19: novel coronavirus; ICD: International Classification of Diseases; IQR: interquartile range; MV: mechanical ventilation; RT-PCR/PCR: reverse transcriptase polymerase chain reaction/polymerase chain reaction; SD: standard deviation; SES: socio-economic status; UK: United Kingdom; USA: United States of America; vs.: versus; y: year(s)

**Supplement 5.** All results data from the included studies**Contents**

| <b>Table</b> | <b>P<sup>2</sup>ROGRESS and Other Factors</b>             | <b>Page</b> |
|--------------|-----------------------------------------------------------|-------------|
| 1            | Pre-existing condition: Body mass index and weight        | 85          |
| 2            | Pre-existing condition: Pre-existing disease, unspecified | 87          |
| 3            | Pre-existing condition: Respiratory disease               | 88          |
| 4            | Pre-existing condition: Cardiovascular disease            | 90          |
| 5            | Pre-existing condition: Endocrine disease                 | 92          |
| 6            | Pre-existing condition: Hepatic disease                   | 93          |
| 7            | Pre-existing condition: Renal disease                     | 94          |
| 8            | Pre-existing condition: Gastrointestinal disease          | 95          |
| 9            | Pre-existing condition: Neurological disease              | 96          |
| 10           | Pre-existing condition: Malignancy                        | 97          |
| 11           | Pre-existing condition: Immunocompromised                 | 98          |
| 12           | Pre-existing condition: Mental health                     | 99          |
| 13           | Place/state of residence                                  | 100         |
| 14           | Race/ethnicity                                            | 101         |
| 15           | Occupation                                                | 103         |
| 16           | Gender identity/sex                                       | 104         |
| 17           | Education/literacy level                                  | 106         |
| 18           | Socio-economic status                                     | 107         |
| 19           | Age                                                       | 109         |
| 20           | Other                                                     | 112         |

Table 1. Body mass index (BMI) and weight

| Risk factor;<br>Outcome among<br>population                                    | Study                           | Total<br>number of<br>patients | Adjusted<br>odds<br>ratio* | 95% CI<br>lower<br>bound | 95% CI<br>upper<br>bound | p-value          | Quality<br>rating |
|--------------------------------------------------------------------------------|---------------------------------|--------------------------------|----------------------------|--------------------------|--------------------------|------------------|-------------------|
| <b>BMI unspecified</b>                                                         |                                 |                                |                            |                          |                          |                  |                   |
| <b>Hospitalization</b>                                                         |                                 |                                |                            |                          |                          |                  |                   |
| community sample                                                               | Lassale C (UK; pc)              | 340,966                        | <b>1.03</b>                | <b>1.02</b>              | <b>1.05</b>              | <b>&lt;0.001</b> | Fair              |
| community sample                                                               | Patel AP (UK; pc)               | 418,794                        | <b>1.04</b>                | <b>1.03</b>              | <b>1.06</b>              | <b>&lt;0.001</b> | Fair              |
| <b>Underweight (BMI &lt;18.5) vs. normal weight (BMI &lt;25)</b>               |                                 |                                |                            |                          |                          |                  |                   |
| <b>ICU admission</b>                                                           |                                 |                                |                            |                          |                          |                  |                   |
| hospitalized with COVID-19                                                     | Hajifathalian (USA; rc)<br>#163 | 770                            | aRR 0.68                   | 0.21                     | 2.17                     | 0.519            | Fair              |
| <b>Mechanical ventilation</b>                                                  |                                 |                                |                            |                          |                          |                  |                   |
| hospitalized with COVID-19                                                     | Hajifathalian (USA; rc)<br>#163 | 770                            | aRR 0.48                   | 0.11                     | 2.12                     | 0.333            | Fair              |
| hospitalized with COVID-19                                                     | Palaiodimos L (USA; rc)         | 200                            | 0.76                       | 0.26                     | 2.22                     | 0.613            | Good              |
| <b>Mortality</b>                                                               |                                 |                                |                            |                          |                          |                  |                   |
| hospitalized with COVID-19                                                     | Hajifathalian (USA; rc)<br>#163 | 770                            | aRR 1.64                   | 0.84                     | 3.19                     | 0.145            | Fair              |
| hospitalized with COVID-19                                                     | Palaiodimos L (USA; rc)         | 200                            | 1.37                       | 0.52                     | 3.64                     | 0.527            | Good              |
| <b>Overweight (BMI 25-29.9) vs. normal weight (BMI &lt;25)**</b>               |                                 |                                |                            |                          |                          |                  |                   |
| <b>Hospitalization</b>                                                         |                                 |                                |                            |                          |                          |                  |                   |
| community sample positive<br>for COVID-19                                      | Hamer (UK; pc)                  | 387,109                        | <b>aRR 1.32</b>            | <b>1.09</b>              | <b>1.6</b>               | <b>NR</b>        | Fair              |
| positive for COVID-19                                                          | Petrilli CM (USA; pc)           | 5,279                          | <b>1.3</b>                 | <b>1.07</b>              | <b>1.57</b>              | <b>0.007</b>     | Good              |
| <b>Severe disease</b>                                                          |                                 |                                |                            |                          |                          |                  |                   |
| hospitalized with COVID-19                                                     | Petrilli CM (USA; pc)           | 2,725                          | 0.94                       | 0.73                     | 1.2                      | 0.65             | Good              |
| <b>ICU admission</b>                                                           |                                 |                                |                            |                          |                          |                  |                   |
| hospitalized with COVID-19                                                     | Busetto L (Italy; rc)           | 92                             | <b>11.65</b>               | <b>3.88</b>              | <b>34.96</b>             | <b>&lt;0.001</b> | Fair              |
| hospitalized with COVID-19                                                     | Kalligeros M (USA; rc)          | 103                            | 2.27                       | 0.59                     | 8.83                     | 0.235            | Good              |
| <b>Mechanical ventilation</b>                                                  |                                 |                                |                            |                          |                          |                  |                   |
| ventilation (non-invasive +<br>mechanical) among<br>hospitalized with COVID-19 | Busetto L (Italy; rc)           | 92                             | <b>4.19</b>                | <b>1.36</b>              | <b>12.89</b>             | <b>0.012</b>     | Fair              |
| hospitalized with COVID-19                                                     | Kalligeros M (USA; rc)          | 103                            | 3.7                        | 0.6                      | 22.87                    | 0.159            | Good              |
| <b>Mortality</b>                                                               |                                 |                                |                            |                          |                          |                  |                   |
| hospitalized with COVID-19                                                     | Busetto L (Italy; rc)           | 92                             | 0.27                       | 0.03                     | 2.05                     | 0.204            | Fair              |
| hospitalized with COVID-19                                                     | Petrilli CM (USA; pc)           | 2,725                          | 1.01                       | 0.82                     | 1.25                     | 0.94             | Good              |
| <b>Obese class I or greater (BMI ≥30) vs. normal weight (BMI &lt;30)**</b>     |                                 |                                |                            |                          |                          |                  |                   |
| <b>Hospitalization</b>                                                         |                                 |                                |                            |                          |                          |                  |                   |
| community sample positive<br>for COVID-19                                      | Hamer (UK; pc)                  | 387,109                        | <b>aRR 1.97</b>            | <b>1.61</b>              | <b>2.42</b>              | <b>NR</b>        | Fair              |
| positive for COVID-19                                                          | Price-Haywood EG (USA;<br>rc)   | 3,481                          | <b>1.43</b>                | <b>1.2</b>               | <b>1.71</b>              | <b>NR</b>        | Fair              |
| positive for COVID-19                                                          | Petrilli CM (USA; pc)           | 5,279                          | <b>1.8</b>                 | <b>1.47</b>              | <b>2.2</b>               | <b>&lt;0.001</b> | Good              |
| <b>Severe disease</b>                                                          |                                 |                                |                            |                          |                          |                  |                   |
| hospitalized with COVID-19                                                     | Petrilli CM (USA; pc)           | 2,725                          | 1.11                       | 0.85                     | 1.5                      | 0.44             | Good              |

| Risk factor; Outcome among population                             | Study                        | Total number of patients | Adjusted odds ratio* | 95% CI lower bound | 95% CI upper bound | p-value | Quality rating |
|-------------------------------------------------------------------|------------------------------|--------------------------|----------------------|--------------------|--------------------|---------|----------------|
| <b>ICU admission</b>                                              |                              |                          |                      |                    |                    |         |                |
| hospitalized with COVID-19                                        | Hajifathalian (USA; rc) #163 | 770                      | aRR 1.76             | 1.24               | 2.48               | 0.001   | Fair           |
| hospitalized with COVID-19 (BMI 30-34.9)                          | Kalligeros M (USA; rc)       | 103                      | 2.65                 | 0.64               | 10.95              | 0.178   | Good           |
| hospitalized with COVID-19 (BMI ≥35)                              | Kalligeros M (USA; rc)       | 103                      | 5.39                 | 1.13               | 25.64              | 0.034   | Good           |
| <b>Mechanical ventilation</b>                                     |                              |                          |                      |                    |                    |         |                |
| hospitalized with COVID-19                                        | Hajifathalian (USA; rc) #163 | 770                      | aRR 1.72             | 1.22               | 2.44               | 0.002   | Fair           |
| hospitalized with COVID-19                                        | Kalligeros M (USA; rc)       | 103                      | 6.85                 | 1.05               | 44.82              | 0.045   | Good           |
| hospitalized with COVID-19                                        | Hur K (USA; rc)              | 486                      | 1.46                 | 0.87               | 2.46               | 0.151   | Good           |
| hospitalized with COVID-19                                        | Kalligeros M (USA; rc)       | 103                      | 9.99                 | 1.39               | 71.69              | 0.022   | Good           |
| hospitalized with COVID-19                                        | Palaodimos L (USA; rc)       | 200                      | 3.87                 | 1.47               | 10.18              | 0.006   | Good           |
| <b>Mortality</b>                                                  |                              |                          |                      |                    |                    |         |                |
| hospitalized with COVID-19                                        | Hajifathalian (USA; rc) #163 | 770                      | aRR 1.15             | 0.62               | 2.14               | 0.663   | Fair           |
| hospitalized with COVID-19                                        | Giacomelli A (Italy; pc)     | 233                      | aHR 3.04             | 1.42               | 6.49               | 0.004   | Good           |
| hospitalized with COVID-19                                        | Price-Haywood EG (USA; rc)   | 1,382                    | aHR 0.99             | 0.77               | 1.27               | NR      | Fair           |
| hospitalized with COVID-19, ≤50 y                                 | Klang E (USA; rc)            | 572                      | 1.1                  | 0.5                | 2.3                | 0.755   | Fair           |
| hospitalized with COVID-19, >50 y                                 | Klang E (USA; rc)            | 2,834                    | 1.1                  | 0.9                | 1.3                | 0.421   | Fair           |
| hospitalized with COVID-19                                        | Petrilli CM (USA; pc)        | 2,725                    | 1.08                 | 0.87               | 1.36               | 0.48    | Good           |
| hospitalized with COVID-19                                        | Palaodimos L (USA; rc)       | 200                      | 3.78                 | 1.45               | 9.83               | 0.006   | Good           |
| <b>Mortality</b>                                                  |                              |                          |                      |                    |                    |         |                |
| hospitalized with COVID-19                                        | Petrilli CM (USA; pc)        | 2,725                    | 1.45                 | 0.99               | 2.13               | 0.05    | Good           |
| <b>Obese class III (BMI ≥40) vs. normal weight (BMI &lt;25)**</b> |                              |                          |                      |                    |                    |         |                |
| <b>Hospitalization</b>                                            |                              |                          |                      |                    |                    |         |                |
| positive for COVID-19                                             | Petrilli CM (USA; pc)        | 5,279                    | 2.45                 | 1.78               | 3.36               | <0.001  | Good           |
| <b>Severe disease</b>                                             |                              |                          |                      |                    |                    |         |                |
| hospitalized with COVID-19                                        | Petrilli CM (USA; pc)        | 2,725                    | 1.71                 | 1.1                | 2.7                | 0.02    | Good           |
| <b>Mechanical ventilation</b>                                     |                              |                          |                      |                    |                    |         |                |
| hospitalized with COVID-19                                        | Hur K (USA; rc)              | 486                      | 1.92                 | 0.92               | 4                  | 0.08    | Good           |
| <b>Mortality</b>                                                  |                              |                          |                      |                    |                    |         |                |
| hospitalized with COVID-19                                        | Petrilli CM (USA; pc)        | 2,725                    | 1.45                 | 0.99               | 2.13               | 0.05    | Good           |
| hospitalized with COVID-19, ≤50 y                                 | Klang E (USA; rc)            | 572                      | 5.1                  | 2.3                | 11.1               | <0.001  | Fair           |
| hospitalized with COVID-19, >50 y                                 | Klang E (USA; rc)            | 2,834                    | 1.6                  | 1.2                | 2.3                | 0.004   | Fair           |

\* values are adjusted odds ratio, unless otherwise denoted

\*\* the reference category differs slightly across studies

aHR: adjusted hazards ratio; aRR: adjusted risk ratio; BMI: body mass index; CI: confidence interval; COVID-19: novel coronavirus disease 2019; ICU: intensive care unit; NR: not reported; pc: prospective cohort; rc: retrospective cohort; UK: United Kingdom; USA: United States of America; y: year(s)

**Table 2. Pre-existing disease, unspecified**

| Risk factor;<br>Outcome among<br>population                       | Study                           | Total<br>number of<br>patients | Adjusted<br>odds<br>ratio* | 95% CI<br>lower<br>bound | 95% CI<br>upper<br>bound | p-value | Quality<br>rating |
|-------------------------------------------------------------------|---------------------------------|--------------------------------|----------------------------|--------------------------|--------------------------|---------|-------------------|
| <b>CCI score</b>                                                  |                                 |                                |                            |                          |                          |         |                   |
| <b>Hospitalization</b>                                            |                                 |                                |                            |                          |                          |         |                   |
| positive for COVID-19                                             | Price-Haywood EG (USA; rc)      | 3,481                          | aHR 1.05                   | 1                        | 1.1                      | NR      | Good              |
| <b>Severe disease</b>                                             |                                 |                                |                            |                          |                          |         |                   |
| ICU transfer or death (composite) among hospitalized for COVID-19 | Piano S (Italy)                 | 565                            | 1.21                       | 1.03                     | 1.42                     | 0.021   | Good              |
| <b>Mortality</b>                                                  |                                 |                                |                            |                          |                          |         |                   |
| hospitalized with COVID-19                                        | Price-Haywood EG (USA; rc)      | 1,382                          | aHR 0.99                   | 0.95                     | 1.04                     | NR      | Good              |
| hospitalized with COVID-19                                        | Imam (USA; rc)                  | 1,305                          | 2.71                       | 1.85                     | 3.97                     | <0.001  | Fair              |
| <b>Number of comorbidities</b>                                    |                                 |                                |                            |                          |                          |         |                   |
| <b>Severe disease</b>                                             |                                 |                                |                            |                          |                          |         |                   |
| ICU or death (composite) among positive for COVID-19              | Hajifathalian K (USA; rc) #1154 | 1,059                          | 1.19                       | NR                       | NR                       | 0.021   | Fair              |

\* values are adjusted odds ratio, unless otherwise denoted

aHR: adjusted hazards ratio; CCI: Charlson Comorbidity Index; CI: confidence interval; COVID-19: novel coronavirus disease 2019; ICU: intensive care unit; NR: not reported; rc: retrospective cohort; USA: United States of America; y: year(s)

Table 3. Respiratory disease

| Risk factor;<br>Outcome among<br>population                                                                                                      | Study                   | Total<br>number of<br>patients | Adjusted<br>odds<br>ratio* | 95% CI<br>lower<br>bound | 95% CI<br>upper<br>bound | p-value          | Quality<br>rating |
|--------------------------------------------------------------------------------------------------------------------------------------------------|-------------------------|--------------------------------|----------------------------|--------------------------|--------------------------|------------------|-------------------|
| <b>Asthma</b>                                                                                                                                    |                         |                                |                            |                          |                          |                  |                   |
| <b>Hospitalization</b>                                                                                                                           |                         |                                |                            |                          |                          |                  |                   |
| positive for COVID-19                                                                                                                            | Azar K (USA; rc)        | 1,052                          | 1.52                       | 0.89                     | 2.58                     | >0.05            | Good              |
| <b>Asthma or COPD</b>                                                                                                                            |                         |                                |                            |                          |                          |                  |                   |
| <b>Hospitalization</b>                                                                                                                           |                         |                                |                            |                          |                          |                  |                   |
| positive for COVID-19                                                                                                                            | Petrilli CM (USA; pc)   | 5,279                          | 1.08                       | 0.88                     | 1.33                     | 0.47             | Good              |
| <b>Severe disease</b>                                                                                                                            |                         |                                |                            |                          |                          |                  |                   |
| hospitalized with COVID-19                                                                                                                       | Petrilli CM (USA; pc)   | 2,725                          | 0.99                       | 0.76                     | 1.3                      | 0.93             | Good              |
| <b>Mortality</b>                                                                                                                                 |                         |                                |                            |                          |                          |                  |                   |
| hospitalized with COVID-19                                                                                                                       | Petrilli CM (USA; pc)   | 2,725                          | 1.03                       | 0.83                     | 1.29                     | 0.76             | Good              |
| <b>Chronic pulmonary disease or COPD</b>                                                                                                         |                         |                                |                            |                          |                          |                  |                   |
| <b>Hospitalization</b>                                                                                                                           |                         |                                |                            |                          |                          |                  |                   |
| positive for COVID-19                                                                                                                            | Azar K (USA; rc)        | 1,052                          | 1.8                        | 0.75                     | 4.34                     | >0.05            | Good              |
| community sample                                                                                                                                 | Patel AP (UK; pc)       | 418,794                        | <b>1.51</b>                | <b>1</b>                 | <b>2.28</b>              | <b>0.05</b>      | Fair              |
| <b>Mortality</b>                                                                                                                                 |                         |                                |                            |                          |                          |                  |                   |
| hospitalized with COVID-19                                                                                                                       | Docherty AB (UK; pc)    | 20,133                         | <b>aHR 1.17</b>            | <b>1.09</b>              | <b>1.27</b>              | <b>&lt;0.001</b> | Good              |
| hospitalized with COVID-19                                                                                                                       | Palaiodimos L (USA; rc) | 200                            | 2.05                       | 0.76                     | 5.51                     | 0.156            | Good              |
| <b>Chronic bronchitis</b>                                                                                                                        |                         |                                |                            |                          |                          |                  |                   |
| <b>Hospitalization</b>                                                                                                                           |                         |                                |                            |                          |                          |                  |                   |
| community sample                                                                                                                                 | Lassale C (UK; pc)      | 340,966                        | 1.34                       | 0.81                     | 2.21                     | 0.259            | Fair              |
| <b>Obstructive sleep apnea</b>                                                                                                                   |                         |                                |                            |                          |                          |                  |                   |
| <b>Mechanical ventilation</b>                                                                                                                    |                         |                                |                            |                          |                          |                  |                   |
| hospitalized with COVID-19                                                                                                                       | Palaiodimos L (USA; rc) | 200                            | 1.15                       | 0.4                      | 3.35                     | 0.791            | Good              |
| <b>Pneumonia, previous</b>                                                                                                                       |                         |                                |                            |                          |                          |                  |                   |
| <b>Hospitalization</b>                                                                                                                           |                         |                                |                            |                          |                          |                  |                   |
| community sample                                                                                                                                 | Patel AP (UK; pc)       | 418,794                        | 1.31                       | 0.83                     | 2.05                     | 0.25             | Fair              |
| <b>Other respiratory disease (includes one or more of: asthma, COPD, lung disease, interstitial lung disease, and/or pulmonary hypertension)</b> |                         |                                |                            |                          |                          |                  |                   |
| <b>ICU admission</b>                                                                                                                             |                         |                                |                            |                          |                          |                  |                   |
| hospitalized with COVID-19<br>(includes heart failure,<br>coronary artery disease and<br>cardiomyopathy)                                         | Kalligeros M (USA; rc)  | 103                            | 1.5                        | 0.47                     | 4.82                     | 0.495            | Good              |
| <b>Mechanical ventilation</b>                                                                                                                    |                         |                                |                            |                          |                          |                  |                   |
| hospitalized with COVID-19<br>(includes heart failure,<br>coronary artery disease and<br>cardiomyopathy)                                         | Kalligeros M (USA; rc)  | 103                            | 0.76                       | 0.2                      | 2.86                     | 0.687            | Good              |
| <b>Mortality</b>                                                                                                                                 |                         |                                |                            |                          |                          |                  |                   |
| hospitalized with COVID-19<br>(chronic cardiac disease or<br>congestive heart failure)                                                           | Cummings MJ (USA; pc)   | 257                            | <b>aHR 2.94</b>            | <b>1.48</b>              | <b>5.84</b>              | <b>NR</b>        | Good              |



\* values are adjusted odds ratio, unless otherwise denoted

aHR: adjusted hazards ratio; CI: confidence interval; COPD=Chronic obstructive pulmonary disease; COVID-19: novel coronavirus disease 2019; ICU: intensive care unit; NR: not reported; pc: prospective cohort; rc: retrospective cohort; UK: United Kingdom; USA: United States of America

Table 4. Cardiovascular disease

| Risk factor;<br>Outcome among<br>population                              | Study                   | Total<br>number of<br>patients | Adjusted<br>odds<br>ratio* | 95%<br>CI<br>lower<br>bound | 95%<br>CI<br>upper<br>bound | p-value          | Quality<br>rating |
|--------------------------------------------------------------------------|-------------------------|--------------------------------|----------------------------|-----------------------------|-----------------------------|------------------|-------------------|
| <b>Cardiovascular disease</b>                                            |                         |                                |                            |                             |                             |                  |                   |
| <b>Hospitalization</b>                                                   |                         |                                |                            |                             |                             |                  |                   |
| community sample                                                         | Lassale C (UK; pc)      | 340,966                        | <b>1.06</b>                | <b>0.79</b>                 | <b>1.42</b>                 | <b>0.001</b>     | Fair              |
| positive for COVID-19                                                    | Azar K (USA; rc)        | 1,052                          | 1.32                       | 0.75                        | 2.32                        | >0.05            | Good              |
| <b>Heart failure</b>                                                     |                         |                                |                            |                             |                             |                  |                   |
| <b>Hospitalization</b>                                                   |                         |                                |                            |                             |                             |                  |                   |
| positive for COVID-19                                                    | Azar K (USA; rc)        | 1,052                          | <b>3.34</b>                | <b>1.49</b>                 | <b>7.52</b>                 | <b>&lt;0.001</b> | Good              |
| community sample                                                         | Patel AP (UK; pc)       | 418,794                        | 1.09                       | 0.56                        | 2.14                        | 0.79             | Fair              |
| positive for COVID-19                                                    | Petrilli CM (USA; pc)   | 5,279                          | <b>4.43</b>                | <b>2.59</b>                 | <b>8.04</b>                 | <b>&lt;0.001</b> | Good              |
| <b>Severe disease</b>                                                    |                         |                                |                            |                             |                             |                  |                   |
| hospitalized with COVID-19                                               | Petrilli CM (USA; pc)   | 2,725                          | <b>1.93</b>                | <b>1.4</b>                  | <b>2.6</b>                  | <b>&lt;0.001</b> | Good              |
| <b>Mortality</b>                                                         |                         |                                |                            |                             |                             |                  |                   |
| hospitalized with COVID-19                                               | Palaiodimos L (USA; rc) | 200                            | 1.43                       | 0.5                         | 4.06                        | 0.501            | Good              |
| hospitalized with COVID-19                                               | Petrilli CM (USA; pc)   | 2,725                          | <b>1.54</b>                | <b>1.23</b>                 | <b>1.93</b>                 | <b>&lt;0.001</b> | Good              |
| <b>Coronary artery disease (includes coronary heart disease)</b>         |                         |                                |                            |                             |                             |                  |                   |
| <b>Hospitalization</b>                                                   |                         |                                |                            |                             |                             |                  |                   |
| community sample                                                         | Patel AP (UK; pc)       | 418,794                        | 0.95                       | 0.67                        | 1.36                        | 0.79             | Fair              |
| positive for COVID-19                                                    | Petrilli CM (USA; pc)   | 5,279                          | 1.08                       | 0.81                        | 1.44                        | 0.6              | Good              |
| <b>Severe disease</b>                                                    |                         |                                |                            |                             |                             |                  |                   |
| hospitalized with COVID-19                                               | Petrilli CM (USA; pc)   | 2,725                          | 0.92                       | 0.71                        | 1.2                         | 0.56             | Good              |
| ICU transfer or death<br>(composite) among<br>hospitalized with COVID-19 | Cecconi M (Italy; rc)   | 239                            | <b>aHR 2.02</b>            | <b>1.13</b>                 | <b>3.64</b>                 | <b>0.018</b>     | Fair              |
| <b>Mortality</b>                                                         |                         |                                |                            |                             |                             |                  |                   |
| hospitalized with COVID-19                                               | Palaiodimos L (USA; rc) | 200                            | 1.53                       | 0.54                        | 4.34                        | 0.421            | Good              |
| hospitalized with COVID-19                                               | Petrilli CM (USA; pc)   | 2,725                          | 1.1                        | 0.9                         | 1.35                        | 0.36             | Good              |
| <b>Hyperlipidemia</b>                                                    |                         |                                |                            |                             |                             |                  |                   |
| <b>Hospitalization</b>                                                   |                         |                                |                            |                             |                             |                  |                   |
| positive for COVID-19                                                    | Petrilli CM (USA; pc)   | 5,279                          | <b>0.62</b>                | <b>0.52</b>                 | <b>0.74</b>                 | <b>&lt;0.001</b> | Good              |
| <b>Severe disease</b>                                                    |                         |                                |                            |                             |                             |                  |                   |
| hospitalized with COVID-19                                               | Petrilli CM (USA; pc)   | 2,725                          | 0.93                       | 0.75                        | 1.2                         | 0.51             | Good              |
| <b>Mechanical ventilation</b>                                            |                         |                                |                            |                             |                             |                  |                   |
| hospitalized with COVID-19                                               | Palaiodimos L (USA; rc) | 200                            | 1.66                       | 0.78                        | 3.55                        | 0.188            | Good              |
| <b>Mortality</b>                                                         |                         |                                |                            |                             |                             |                  |                   |
| hospitalized with COVID-19                                               | Petrilli CM (USA; pc)   | 2,725                          | 0.98                       | 0.82                        | 1.17                        | 0.79             | Good              |
| <b>Hypertension</b>                                                      |                         |                                |                            |                             |                             |                  |                   |
| <b>Hospitalization</b>                                                   |                         |                                |                            |                             |                             |                  |                   |
| community sample                                                         | Lassale C (UK; pc)      | 340,966                        | 0.98                       | 0.82                        | 1.17                        | 0.84             | Fair              |

| Risk factor;<br>Outcome among<br>population                                                                                                                      | Study                  | Total<br>number of<br>patients | Adjusted<br>odds<br>ratio* | 95%<br>CI<br>lower<br>bound | 95%<br>CI<br>upper<br>bound | p-value          | Quality<br>rating |
|------------------------------------------------------------------------------------------------------------------------------------------------------------------|------------------------|--------------------------------|----------------------------|-----------------------------|-----------------------------|------------------|-------------------|
| community sample                                                                                                                                                 | Patel AP (UK; pc)      | 418,794                        | 1.12                       | 0.9                         | 1.39                        | 0.32             | Fair              |
| positive for COVID-19                                                                                                                                            | Azar K (USA; rc)       | 1,052                          | 1.4                        | 0.93                        | 2.1                         | >0.05            | Good              |
| positive for COVID-19                                                                                                                                            | Petrilli CM (USA; pc)  | 5,279                          | <b>1.78</b>                | <b>1.49</b>                 | <b>2.12</b>                 | <b>&lt;0.001</b> | Good              |
| <b>Severe disease</b>                                                                                                                                            |                        |                                |                            |                             |                             |                  |                   |
| hospitalized with COVID-19                                                                                                                                       | Petrilli CM (USA; pc)  | 2,725                          | 0.96                       | 0.75                        | 1.2                         | 0.76             | Good              |
| <b>ICU admission</b>                                                                                                                                             |                        |                                |                            |                             |                             |                  |                   |
| hospitalized with COVID-19                                                                                                                                       | Kalligeros M (USA; rc) | 103                            | 0.79                       | 0.27                        | 2.28                        | 0.663            | Good              |
| <b>Mechanical ventilation</b>                                                                                                                                    |                        |                                |                            |                             |                             |                  |                   |
| hospitalized with COVID-19                                                                                                                                       | Kalligeros M (USA; rc) | 103                            | 0.47                       | 0.13                        | 1.66                        | 0.242            | Good              |
| <b>Mortality</b>                                                                                                                                                 |                        |                                |                            |                             |                             |                  |                   |
| hospitalized with COVID-19                                                                                                                                       | Cummings MJ (USA; pc)  | 257                            | aHR 1.58                   | 0.89                        | 2.81                        | NR               | Good              |
| hospitalized with COVID-19                                                                                                                                       | Petrilli CM (USA; pc)  | 2,725                          | 0.98                       | 0.78                        | 1.23                        | 0.86             | Good              |
| <b>Other cardiovascular disease (includes one or more of: chronic cardiac disease, heart disease, heart failure, coronary artery disease and cardiomyopathy)</b> |                        |                                |                            |                             |                             |                  |                   |
| <b>ICU admission</b>                                                                                                                                             |                        |                                |                            |                             |                             |                  |                   |
| hospitalized with COVID-19                                                                                                                                       | Kalligeros M (USA; rc) | 103                            | 1.52                       | 0.51                        | 4.51                        | 0.448            | Good              |
| <b>Mechanical ventilation</b>                                                                                                                                    |                        |                                |                            |                             |                             |                  |                   |
| hospitalized with COVID-19                                                                                                                                       | Kalligeros M (USA; rc) | 103                            | <b>3.41</b>                | <b>1.05</b>                 | <b>11.06</b>                | <b>0.041</b>     | Good              |
| <b>Mortality</b>                                                                                                                                                 |                        |                                |                            |                             |                             |                  |                   |
| hospitalized with COVID-19                                                                                                                                       | Cummings MJ (USA; pc)  | 257                            | <b>aHR 1.76</b>            | <b>1.08</b>                 | <b>2.86</b>                 | <b>NR</b>        | Good              |
| hospitalized with COVID-19                                                                                                                                       | Docherty AB (UK; pc)   | 20,133                         | <b>aHR 1.16</b>            | <b>1.08</b>                 | <b>1.24</b>                 | <b>&lt;0.001</b> | Good              |
| <b>Ischemic stroke</b>                                                                                                                                           |                        |                                |                            |                             |                             |                  |                   |
| <b>Hospitalization</b>                                                                                                                                           |                        |                                |                            |                             |                             |                  |                   |
| community sample                                                                                                                                                 | Patel AP (UK; pc)      | 418,794                        | 0.94                       | 0.39                        | 2.3                         | 0.90             | Fair              |

\* values are adjusted odds ratio, unless otherwise denoted

aHR: adjusted hazards ratio; CI: confidence interval; COVID-19: novel coronavirus disease 2019; ICU: intensive care unit; NR: not reported; pc: prospective cohort; rc: retrospective cohort; UK: United Kingdom; USA: United States of America

Table 5. Endocrine disease

| Risk factor;<br>Outcome among<br>population | Study                   | Total<br>number<br>of<br>patients | Adjusted<br>odds<br>ratio* | 95% CI<br>lower<br>bound | 95% CI<br>upper<br>bound | p-value          | Quality<br>rating |
|---------------------------------------------|-------------------------|-----------------------------------|----------------------------|--------------------------|--------------------------|------------------|-------------------|
| <b>Diabetes</b>                             |                         |                                   |                            |                          |                          |                  |                   |
| <b>Hospitalization</b>                      |                         |                                   |                            |                          |                          |                  |                   |
| community sample                            | Patel AP (UK; pc)       | 418,794                           | <b>1.52</b>                | <b>1.14</b>              | <b>2.03</b>              | <b>0.01</b>      | Fair              |
| positive for COVID-19                       | Petrilli CM (USA; pc)   | 5,279                             | <b>2.24</b>                | <b>1.84</b>              | <b>2.73</b>              | <b>&lt;0.001</b> | Good              |
| positive for COVID-19                       | Azar K (USA; rc)        | 1,052                             | <b>2.17</b>                | <b>1.33</b>              | <b>3.53</b>              | <b>&lt;0.01</b>  | Fair              |
| <b>Severe disease</b>                       |                         |                                   |                            |                          |                          |                  |                   |
| hospitalized with COVID-19                  | Petrilli CM (USA; pc)   | 2,725                             | 1.23                       | 0.99                     | 1.5                      | 0.06             | Good              |
| <b>ICU admission</b>                        |                         |                                   |                            |                          |                          |                  |                   |
| hospitalized with COVID-19                  | Kalligeros M (USA; rc)  | 103                               | 1.91                       | 0.71                     | 5.19                     | 0.202            | Good              |
| <b>Mechanical ventilation</b>               |                         |                                   |                            |                          |                          |                  |                   |
| hospitalized with COVID-19                  | Hur K (USA; rc)         | 486                               | <b>1.64</b>                | <b>1.02</b>              | <b>2.66</b>              | <b>0.046</b>     | Good              |
| hospitalized with COVID-19                  | Kalligeros M (USA; rc)  | 103                               | 2.13                       | 0.73                     | 6.22                     | 0.168            | Good              |
| hospitalized with COVID-19                  | Palaiodimos L (USA; rc) | 200                               | 1.26                       | 0.58                     | 2.73                     | 0.557            | Good              |
| <b>Mortality</b>                            |                         |                                   |                            |                          |                          |                  |                   |
| hospitalized with COVID-19                  | Cummings MJ (USA; pc)   | 257                               | aHR 1.31                   | 0.81                     | 2.1                      | NR               | Good              |
| hospitalized with COVID-19                  | Docherty AB (UK; pc)    | 20,133                            | aHR 1.06                   | 0.99                     | 1.14                     | 0.087            | Good              |
| hospitalized with COVID-19                  | Palaiodimos L (USA; rc) | 200                               | 1.16                       | 0.55                     | 2.44                     | 0.698            | Good              |
| hospitalized with COVID-19                  | Petrilli CM (USA; pc)   | 2,725                             | 1.01                       | 0.85                     | 1.21                     | 0.87             | Good              |

\* values are adjusted odds ratio, unless otherwise denoted

aHR: adjusted hazards ratio; CI: confidence interval; COVID-19: novel coronavirus disease 2019; ICU: intensive care unit; NR: not reported; pc: prospective cohort; rc: retrospective cohort; UK: United Kingdom; USA: United States of America

**Table 6. Hepatic disease**

| <b>Risk factor;<br/>Outcome among<br/>population</b>       | <b>Study</b>               | <b>Total<br/>number<br/>of<br/>patients</b> | <b>Adjusted<br/>odds<br/>ratio*</b> | <b>95% CI<br/>lower<br/>bound</b> | <b>95% CI<br/>upper<br/>bound</b> | <b>p-value</b>   | <b>Quality<br/>rating</b> |
|------------------------------------------------------------|----------------------------|---------------------------------------------|-------------------------------------|-----------------------------------|-----------------------------------|------------------|---------------------------|
| <b>Liver disease</b>                                       |                            |                                             |                                     |                                   |                                   |                  |                           |
| <b>Hospitalization</b>                                     |                            |                                             |                                     |                                   |                                   |                  |                           |
| positive for COVID-19                                      | Singh S (USA; rc)<br>#1201 | 464                                         | <b>aRR 1.3</b>                      | <b>1.1</b>                        | <b>1.6</b>                        | <b>0.006</b>     | Good                      |
| <b>Mortality</b>                                           |                            |                                             |                                     |                                   |                                   |                  |                           |
| hospitalized with COVID-19                                 | Docherty AB (UK; pc)       | 20,133                                      | <b>aHR 1.51</b>                     | <b>1.21</b>                       | <b>1.88</b>                       | <b>&lt;0.001</b> | Good                      |
| positive for COVID-19                                      | Singh S (USA; rc)<br>#1201 | 464                                         | <b>aRR 3.0</b>                      | <b>1.5</b>                        | <b>6.0</b>                        | <b>0.001</b>     | Good                      |
| positive for COVID-19<br>(liver disease with<br>cirrhosis) | Singh S (USA; rc)<br>#1201 | 464                                         | <b>aRR 4.6</b>                      | <b>2.6</b>                        | <b>8.3</b>                        | <b>&lt;0.001</b> | Good                      |

\* values are adjusted odds ratio, unless otherwise denoted

aHR: adjusted hazards ratio; aRR: adjusted risk ratio; CI: confidence interval; COVID-19: novel coronavirus disease 2019; pc: prospective cohort; rc: retrospective cohort; UK: United Kingdom; USA: United States of America

**Table 7. Renal disease**

| Risk factor;<br>Outcome among<br>population | Study                   | Total<br>number<br>of<br>patients | Adjusted<br>odds<br>ratio* | 95% CI<br>lower<br>bound | 95% CI<br>upper<br>bound | p-value          | Quality<br>rating |
|---------------------------------------------|-------------------------|-----------------------------------|----------------------------|--------------------------|--------------------------|------------------|-------------------|
| <b>Chronic kidney disease</b>               |                         |                                   |                            |                          |                          |                  |                   |
| <b>Hospitalization</b>                      |                         |                                   |                            |                          |                          |                  |                   |
| community sample                            | Patel AP (UK; pc)       | 418,794                           | <b>2.01</b>                | <b>1.19</b>              | <b>3.41</b>              | <b>0.01</b>      | Fair              |
| positive for COVID-19                       | Petrilli CM (USA; pc)   | 5,279                             | <b>2.6</b>                 | <b>1.89</b>              | <b>3.61</b>              | <b>&lt;0.001</b> | Good              |
| <b>Severe disease</b>                       |                         |                                   |                            |                          |                          |                  |                   |
| hospitalized with COVID-19                  | Petrilli CM (USA; pc)   | 2,725                             | <b>0.73</b>                | <b>0.55</b>              | <b>1</b>                 | <b>0.04</b>      | Good              |
| hospitalized with COVID-19                  | Bhargava A (USA; rc)    | 197                               | <b>7.4</b>                 | <b>2.5</b>               | <b>22</b>                | <b>&lt;0.001</b> | Good              |
| <b>Mortality</b>                            |                         |                                   |                            |                          |                          |                  |                   |
| hospitalized with COVID-19                  | Docherty AB (UK; pc)    | 20,133                            | <b>aHR 1.28</b>            | <b>1.18</b>              | <b>1.39</b>              | <b>&lt;0.001</b> | Good              |
| hospitalized with COVID-19                  | Petrilli CM (USA; pc)   | 2,725                             | 0.92                       | 0.73                     | 1.16                     | 0.49             | Good              |
| hospitalized with COVID-19                  | Palaiodimos L (USA; rc) | 200                               | 1.15                       | 0.49                     | 2.68                     | 0.746            | Good              |

\* values are adjusted odds ratio, unless otherwise denoted

aHR: adjusted hazards ratio; CI: confidence interval; COVID-19: novel coronavirus disease 2019; pc: prospective cohort; rc: retrospective cohort; UK: United Kingdom; USA: United States of America

**Table 8. Gastrointestinal disease**

| Risk factor;<br>Outcome among<br>population | Study                     | Total<br>number<br>of<br>patients | Adjusted<br>odds<br>ratio* | 95% CI<br>lower<br>bound | 95% CI<br>upper<br>bound | p-value | Quality<br>rating |
|---------------------------------------------|---------------------------|-----------------------------------|----------------------------|--------------------------|--------------------------|---------|-------------------|
| <b>Irritable bowel disease</b>              |                           |                                   |                            |                          |                          |         |                   |
| <b>Hospitalization</b>                      |                           |                                   |                            |                          |                          |         |                   |
| positive for COVID-19                       | Singh S (USA; rc)<br>#121 | 464                               | aRR 1.10                   | 0.74                     | 1.4                      | 0.91    | Good              |
| <b>Severe disease</b>                       |                           |                                   |                            |                          |                          |         |                   |
| positive for COVID-19                       | Singh S (USA; rc)<br>#121 | 464                               | aRR 0.93                   | 0.68                     | 1.27                     | 0.66    | Good              |

\* values are adjusted odds ratio, unless otherwise denoted

aRR: adjusted risk ratio; CI: confidence interval; COVID-19: novel coronavirus disease 2019; rc: retrospective cohort;

USA: United States of America

**Table 9. Neurological disease**

| Risk factor;<br>Outcome among<br>population                | Study                    | Total<br>number<br>of<br>patients | Adjusted<br>odds<br>ratio* | 95% CI<br>lower<br>bound | 95% CI<br>upper<br>bound | p-value          | Quality<br>rating |
|------------------------------------------------------------|--------------------------|-----------------------------------|----------------------------|--------------------------|--------------------------|------------------|-------------------|
| <b>Alzheimer's disease or dementia</b>                     |                          |                                   |                            |                          |                          |                  |                   |
| <b>Hospitalization</b>                                     |                          |                                   |                            |                          |                          |                  |                   |
| community sample                                           | Patel AP (UK; pc)        | 418,794                           | 5.08                       | 0.7                      | 36.68                    | 0.11             | Fair              |
| <b>Dementia</b>                                            |                          |                                   |                            |                          |                          |                  |                   |
| <b>Mortality</b>                                           |                          |                                   |                            |                          |                          |                  |                   |
| hospitalized with COVID-19                                 | Bianchetti A (Italy; rc) | 627                               | <b>1.84</b>                | <b>1.08</b>              | <b>3.13</b>              | <b>0.024</b>     | Fair              |
| hospitalized with COVID-19 (dementia)                      | Docherty AB (UK; pc)     | 20,133                            | <b>aHR 1.40</b>            | <b>1.28</b>              | <b>1.52</b>              | <b>&lt;0.001</b> | Good              |
| hospitalized with COVID-19                                 | Covino M (Italy; rc)     | 69                                | <b>aHR 3.87</b>            | <b>1.23</b>              | <b>12.17</b>             | <b>0.021</b>     | Fair              |
| hospitalized with COVID-19 (chronic neurological disorder) | Docherty AB (UK; pc)     | 20,133                            | <b>aHR 1.17</b>            | <b>1.06</b>              | <b>1.29</b>              | <b>0.001</b>     | Good              |

\* values are adjusted odds ratio, unless otherwise denoted

\*\* the reference category differs slightly across studies

aHR: adjusted hazards ratio; CI: confidence interval; COVID-19: novel coronavirus disease 2019; pc: prospective cohort; rc: retrospective cohort; UK: United Kingdom



Table 10. Malignancy

| Risk factor;<br>Outcome among<br>population | Study                  | Total<br>number<br>of<br>patients | Adjusted<br>odds<br>ratio* | 95% CI<br>lower<br>bound | 95% CI<br>upper<br>bound | p-value      | Quality<br>rating |
|---------------------------------------------|------------------------|-----------------------------------|----------------------------|--------------------------|--------------------------|--------------|-------------------|
| <b>Cancer or tumor</b>                      |                        |                                   |                            |                          |                          |              |                   |
| <b>Hospitalization</b>                      |                        |                                   |                            |                          |                          |              |                   |
| positive for COVID-19                       | Azar K (USA; rc)       | 1,052                             | 0.96                       | 0.45                     | 2.03                     | >0.05        | Good              |
| positive for COVID-19                       | Petrilli CM (USA; pc)  | 5,279                             | 0.88                       | 0.65                     | 1.19                     | 0.41         | Good              |
| <b>Severe disease</b>                       |                        |                                   |                            |                          |                          |              |                   |
| hospitalized with COVID-19                  | Petrilli CM (USA; pc)  | 2,725                             | 1.3                        | 0.95                     | 1.8                      | 0.1          | Good              |
| hospitalized with COVID-19                  | Colaneri M (Italy; rc) | 44                                | 22.199                     | 0.826                    | 596.15<br>2              | 0.0648       | Good              |
| <b>Mortality</b>                            |                        |                                   |                            |                          |                          |              |                   |
| hospitalized with COVID-19                  | Petrilli CM (USA; pc)  | 2,725                             | <b>1.29</b>                | <b>1.03</b>              | <b>1.62</b>              | <b>0.03</b>  | Good              |
| hospitalized with COVID-19                  | Docherty AB (UK; pc)   | 20,133                            | <b>aHR 1.13</b>            | <b>1.02</b>              | <b>1.24</b>              | <b>0.017</b> | Good              |
| positive for COVID-19                       | Shah V (UK; rc)        | 1,183                             | <b>aHR 1.74</b>            | <b>1.12</b>              | <b>2.71</b>              | <b>0.014</b> | Fair              |
| <b>Hematological cancer - lymphoid</b>      |                        |                                   |                            |                          |                          |              |                   |
| <b>Mortality</b>                            |                        |                                   |                            |                          |                          |              |                   |
| positive for COVID-19                       | Shah V (UK; rc)        | 1,183                             | <b>aHR 1.75</b>            | <b>1.07</b>              | <b>2.87</b>              | <b>0.026</b> | Fair              |
| <b>Hematological cancer - myeloid</b>       |                        |                                   |                            |                          |                          |              |                   |
| <b>Mortality</b>                            |                        |                                   |                            |                          |                          |              |                   |
| positive for COVID-19                       | Shah V (UK; rc)        | 1,183                             | aHR 1.70                   | 0.7                      | 4.13                     | 0.244        | Fair              |

\* values are adjusted odds ratio, unless otherwise denoted

aHR: adjusted hazards ratio; CI: confidence interval; COVID-19: novel coronavirus disease 2019; pc: prospective cohort; rc: retrospective cohort; UK: United Kingdom; USA: United States of America

**Table 11. Immunocompromised**

| Risk factor;<br>Outcome among<br>population                          | Study                  | Total<br>number<br>of<br>patients | Adjusted<br>odds<br>ratio* | 95% CI<br>lower<br>bound | 95% CI<br>upper<br>bound | p-value      | Quality<br>rating |
|----------------------------------------------------------------------|------------------------|-----------------------------------|----------------------------|--------------------------|--------------------------|--------------|-------------------|
| <b>Rheumatic disease</b>                                             |                        |                                   |                            |                          |                          |              |                   |
| <b>Hospitalization</b>                                               |                        |                                   |                            |                          |                          |              |                   |
| positive for COVID-19                                                | D'Silva K (USA;<br>pc) | 156                               | 1.1                        | 0.51                     | 2.38                     | 0.81         | Fair              |
| <b>ICU admission</b>                                                 |                        |                                   |                            |                          |                          |              |                   |
| ICU or mechanical<br>ventilation among<br>hospitalized with COVID-19 | D'Silva K (USA;<br>pc) | 65                                | <b>2.92</b>                | <b>1.002</b>             | <b>8.49</b>              | <b>0.049</b> | Fair              |
| <b>Mortality</b>                                                     |                        |                                   |                            |                          |                          |              |                   |
| positive for COVID-19                                                | D'Silva K (USA;<br>pc) | 156                               | 1.58                       | 0.31                     | 8.03                     | 0.58         | Fair              |
| <b>HIV</b>                                                           |                        |                                   |                            |                          |                          |              |                   |
| <b>Mortality</b>                                                     |                        |                                   |                            |                          |                          |              |                   |
| hospitalized with COVID-19                                           | Okoh A (USA; rc)       | 251                               | <b>0.07</b>                | <b>0.03</b>              | <b>0.52</b>              | <b>0.006</b> | Good              |

\* values are adjusted odds ratio, unless otherwise denoted

CI: confidence interval; COVID-19: novel coronavirus disease 2019; HIV: human immunodeficiency virus; ICU: intensive care unit; pc: prospective cohort; rc: retrospective cohort; USA: United States of America

**Table 12. Mental health**

| Risk factor;<br>Outcome among<br>population | Study                 | Total<br>number<br>of<br>patients | Adjusted<br>odds<br>ratio* | 95% CI<br>lower<br>bound | 95% CI<br>upper<br>bound | p-value | Quality<br>rating |
|---------------------------------------------|-----------------------|-----------------------------------|----------------------------|--------------------------|--------------------------|---------|-------------------|
| <b>Depression</b>                           |                       |                                   |                            |                          |                          |         |                   |
| <b>Hospitalization</b>                      |                       |                                   |                            |                          |                          |         |                   |
| positive for COVID-19                       | Azar K (USA; rc)      | 1,052                             | 1.18                       | 0.57                     | 2.41                     | >0.05   | Good              |
| <b>Ever seen a psychiatrist</b>             |                       |                                   |                            |                          |                          |         |                   |
| <b>Hospitalization</b>                      |                       |                                   |                            |                          |                          |         |                   |
| community sample                            | Lassale C (UK;<br>pc) | 340,966                           | 1.24                       | 0.99                     | 1.55                     | 0.057   | Fair              |

\* values are adjusted odds ratio, unless otherwise denoted

\*\* the reference category differs slightly across studies

CI: confidence interval; COVID-19: novel coronavirus disease 2019; pc: prospective cohort; rc: retrospective cohort; UK: United Kingdom; USA: United States of America

Table 13. Place/state of residence

| Risk factor;<br>Outcome among<br>population    | Study                      | Total<br>number of<br>patients | Adjusted<br>odds<br>ratio* | 95% CI<br>lower<br>bound | 95% CI<br>upper<br>bound | p-value | Quality<br>rating |
|------------------------------------------------|----------------------------|--------------------------------|----------------------------|--------------------------|--------------------------|---------|-------------------|
| <b>Low-income geographic area</b>              |                            |                                |                            |                          |                          |         |                   |
| <b>Hospitalization</b>                         |                            |                                |                            |                          |                          |         |                   |
| positive for COVID-19                          | Price-Haywood EG (USA; rc) | 3,481                          | 1.22                       | 1.04                     | 1.43                     | NR      | Good              |
| <b>Homeless</b>                                |                            |                                |                            |                          |                          |         |                   |
| <b>Hospitalization</b>                         |                            |                                |                            |                          |                          |         |                   |
| positive for COVID-19                          | Azar K (USA; rc)           | 1,052                          | 3.25                       | 0.38                     | 28.02                    | >0.05   | Good              |
| <b>Number of people in household (1 vs. 2)</b> |                            |                                |                            |                          |                          |         |                   |
| <b>Hospitalization</b>                         |                            |                                |                            |                          |                          |         |                   |
| community sample                               | Lassale C (UK; pc)         | 340,966                        | 1.15                       | 0.93                     | 1.43                     | 0.195   | Fair              |
| <b>Number of people in household (3 vs. 2)</b> |                            |                                |                            |                          |                          |         |                   |
| <b>Hospitalization</b>                         |                            |                                |                            |                          |                          |         |                   |
| community sample                               | Lassale C (UK; pc)         | 340,966                        | 1.22                       | 0.97                     | 1.55                     | 0.093   | Fair              |
| <b>Number of people in household (4 vs. 2)</b> |                            |                                |                            |                          |                          |         |                   |
| <b>Hospitalization</b>                         |                            |                                |                            |                          |                          |         |                   |
| community sample                               | Lassale C (UK; pc)         | 340,966                        | 1.59                       | 1.26                     | 2.01                     | <0.001  | Fair              |
| <b>Suburban vs. urban hospital</b>             |                            |                                |                            |                          |                          |         |                   |
| <b>Mechanical ventilation</b>                  |                            |                                |                            |                          |                          |         |                   |
| hospitalized with COVID-19                     | Hur K (USA; rc)            | 486                            | 1.35                       | 0.82                     | 2.23                     | 0.241   | Good              |

\* values are adjusted odds ratio, unless otherwise denoted

CI: confidence interval; COVID-19: novel coronavirus disease 2019; pc: prospective cohort; rc: retrospective cohort; UK: United Kingdom; USA: United States of America; vs.: versus

Table 14. Race/ethnicity

| Risk factor;<br>Outcome among<br>population    | Study                          | Total<br>number<br>of<br>patients | Adjusted<br>odds<br>ratio* | 95% CI<br>lower<br>bound | 95% CI<br>upper<br>bound | p-value          | Quality<br>rating |
|------------------------------------------------|--------------------------------|-----------------------------------|----------------------------|--------------------------|--------------------------|------------------|-------------------|
| <b>Black vs. non-Hispanic White</b>            |                                |                                   |                            |                          |                          |                  |                   |
| <b>Hospitalization</b>                         |                                |                                   |                            |                          |                          |                  |                   |
| community sample                               | Lassale C (UK; pc)             | 340,966                           | <b>2.66</b>                | <b>1.82</b>              | <b>3.91</b>              | <b>&lt;0.001</b> | Fair              |
| community sample                               | Patel AP (UK; pc)              | 418,794                           | <b>2.38</b>                | <b>1.52</b>              | <b>3.74</b>              | <b>&lt;0.001</b> | Fair              |
| positive for COVID-19                          | Azar K (USA; rc)               | 1,052                             | <b>2.67</b>                | <b>1.3</b>               | <b>5.47</b>              | <b>&lt;0.01</b>  | Good              |
| positive for COVID-19                          | Petrilli CM (USA; pc)          | 5,279                             | 0.81                       | 0.65                     | 1.01                     | 0.06             | Good              |
| positive for COVID-19                          | Price-Haywood EG (USA; rc)     | 3,481                             | <b>1.96</b>                | <b>1.62</b>              | <b>2.37</b>              | <b>NR</b>        | Good              |
| <b>Severe disease</b>                          |                                |                                   |                            |                          |                          |                  |                   |
| hospitalized with COVID-19                     | Gold JAW (USA; pc)             | 305                               | aHR 0.63                   | 0.35                     | 1.13                     | >0.05            | Good              |
| hospitalized with COVID-19                     | Petrilli CM (USA; pc)          | 2,725                             | <b>0.57</b>                | <b>0.41</b>              | <b>0.8</b>               | <b>0.001</b>     | Good              |
| <b>ICU admission</b>                           |                                |                                   |                            |                          |                          |                  |                   |
| hospitalized with COVID-19                     | Hajifathalian (USA; rc) #163   | 770                               | aRR 1.16                   | 0.7                      | 1.94                     | 0.558            | Fair              |
| hospitalized with COVID-19                     | Kalligeros M (USA; rc)         | 103                               | 0.8                        | 0.26                     | 2.45                     | 0.701            | Good              |
| <b>Mechanical Ventilation</b>                  |                                |                                   |                            |                          |                          |                  |                   |
| hospitalized with COVID-19                     | Kalligeros M (USA; rc)         | 103                               | 1.83                       | 0.55                     | 6.11                     | 0.327            | Good              |
| hospitalized with COVID-19                     | Hajifathalian (USA; rc) #163   | 770                               | aRR 1.23                   | 0.74                     | 2.06                     | 0.42             | Fair              |
| hospitalized with COVID-19                     | Hur K (USA; rc)                | 486                               | 0.56                       | 0.3                      | 1.01                     | 0.058            | Good              |
| <b>Mortality</b>                               |                                |                                   |                            |                          |                          |                  |                   |
| hospitalized with COVID-19                     | Hajifathalian (USA; rc) #163   | 770                               | aRR 1.49                   | 0.67                     | 3.29                     | 0.328            | Fair              |
| hospitalized with COVID-19                     | Perez-Guzman PN (UK; rc)       | 520                               | <b>1.86</b>                | <b>1.03</b>              | <b>3.35</b>              | <b>NR</b>        | Good              |
| hospitalized with COVID-19                     | Petrilli CM (USA; pc)          | 2,725                             | <b>0.71</b>                | <b>0.53</b>              | <b>0.94</b>              | <b>0.02</b>      | Good              |
| hospitalized with COVID-19                     | Price-Haywood EG (USA; rc)     | 1,382                             | aHR 0.89                   | 0.68                     | 1.17                     | NR               | Good              |
| hospitalized with COVID-19 (Black-African)**   | Public Health England (UK; rc) | 130,091                           | aHR 1.06                   | 0.96                     | 1.18                     | 0.24             | Fair              |
| hospitalized with COVID-19 (Black-Caribbean)** | Public Health England (UK; rc) | 130,091                           | <b>aHR 1.10</b>            | <b>1.02</b>              | <b>1.19</b>              | <b>0.01</b>      | Fair              |
| hospitalized with COVID-19 (Black-Other)**     | Public Health England (UK; rc) | 130,091                           | <b>aHR 1.35</b>            | <b>1.18</b>              | <b>1.55</b>              | <b>&lt;0.001</b> | Fair              |
| <b>Hispanic vs. Non-Hispanic White</b>         |                                |                                   |                            |                          |                          |                  |                   |
| <b>Hospitalization</b>                         |                                |                                   |                            |                          |                          |                  |                   |
| positive for COVID-19                          | Azar K (USA; rc)               | 1,052                             | 1.24                       | 0.78                     | 1.98                     | >0.05            | Good              |
| positive for COVID-19                          | Petrilli CM (USA; pc)          | 5,279                             | <b>1.63</b>                | <b>1.35</b>              | <b>1.97</b>              | <b>&lt;0.001</b> | Good              |
| <b>Severe disease</b>                          |                                |                                   |                            |                          |                          |                  |                   |
| hospitalized with COVID-19                     | Petrilli CM (USA; pc)          | 2,725                             | 0.89                       | 0.69                     | 1.2                      | 0.38             | Good              |
| <b>ICU admission</b>                           |                                |                                   |                            |                          |                          |                  |                   |
| hospitalized with COVID-19                     | Kalligeros M (USA; rc)         | 103                               | 0.56                       | 0.19                     | 1.58                     | 0.271            | Good              |
| <b>Mechanical ventilation</b>                  |                                |                                   |                            |                          |                          |                  |                   |
| hospitalized with COVID-19                     | Hur K (USA; rc)                | 486                               | 0.83                       | 0.44                     | 1.55                     | 0.565            | Good              |

| Risk factor;<br>Outcome among<br>population         | Study                             | Total<br>number<br>of<br>patients | Adjusted<br>odds<br>ratio* | 95% CI<br>lower<br>bound | 95% CI<br>upper<br>bound | p-value          | Quality<br>rating |
|-----------------------------------------------------|-----------------------------------|-----------------------------------|----------------------------|--------------------------|--------------------------|------------------|-------------------|
| hospitalized with COVID-19                          | Kalligeros M (USA; rc)            | 103                               | 1.17                       | 0.36                     | 3.82                     | 0.796            | Good              |
| <b>Asian vs. non-Hispanic White</b>                 |                                   |                                   |                            |                          |                          |                  |                   |
| <b>Hospitalization</b>                              |                                   |                                   |                            |                          |                          |                  |                   |
| community sample                                    | Lassale C (UK; pc)                | 340,966                           | 1.43                       | 0.91                     | 2.26                     | 0.125            | Fair              |
| community sample                                    | Patel AP (UK; pc)                 | 418,794                           | <b>1.75</b>                | <b>1.08</b>              | <b>2.85</b>              | <b>0.02</b>      | Fair              |
| positive for COVID-19                               | Petrilli CM (USA; pc)             | 5,279                             | 1.29                       | 0.97                     | 1.72                     | 0.08             | Good              |
| <b>Severe disease</b>                               |                                   |                                   |                            |                          |                          |                  |                   |
| hospitalized with COVID-19                          | Petrilli CM (USA; pc)             | 2,725                             | 1.24                       | 0.82                     | 1.9                      | 0.3              | Good              |
| <b>ICU admission</b>                                |                                   |                                   |                            |                          |                          |                  |                   |
| hospitalized with COVID-19                          | Hajifathalian (USA; rc)#163       | 770                               | <b>aRR 1.65</b>            | <b>1.05</b>              | <b>2.6</b>               | <b>0.031</b>     | Fair              |
| <b>Mechanical ventilation</b>                       |                                   |                                   |                            |                          |                          |                  |                   |
| hospitalized with COVID-19                          | Hajifathalian (USA; rc)#163       | 770                               | <b>aRR 1.68</b>            | <b>1.06</b>              | <b>2.66</b>              | <b>0.027</b>     | Fair              |
| <b>Mortality</b>                                    |                                   |                                   |                            |                          |                          |                  |                   |
| hospitalized with COVID-19                          | Hajifathalian (USA; rc)#163       | 770                               | aRR 1.47                   | 0.85                     | 2.55                     | 0.168            | Fair              |
| hospitalized with COVID-19                          | Perez-Guzman PN (UK; rc)          | 520                               | 1.74                       | 0.9                      | 3.36                     | NR               | Good              |
| hospitalized with COVID-19                          | Petrilli CM (USA; pc)             | 2,725                             | 1.26                       | 0.91                     | 1.75                     | 0.16             | Good              |
| hospitalized with COVID-19<br>(Asian-Bangladeshi)** | Public Health England (UK;<br>rc) | 130,091                           | <b>aHR 2.02</b>            | <b>1.74</b>              | <b>2.35</b>              | <b>&lt;0.001</b> | Fair              |
| hospitalized with COVID-19<br>(Asian-Chinese)**     | Public Health England (UK;<br>rc) | 130,091                           | <b>aHR 1.23</b>            | <b>1.04</b>              | <b>1.58</b>              | <b>0.02</b>      | Fair              |
| hospitalized with COVID-19<br>(Asian-Indian)**      | Public Health England (UK;<br>rc) | 130,091                           | <b>aHR 1.22</b>            | <b>1.13</b>              | <b>1.32</b>              | <b>&lt;0.001</b> | Fair              |
| hospitalized with COVID-19<br>(Asian-Other)**       | Public Health England (UK;<br>rc) | 130,091                           | <b>aHR 1.13</b>            | <b>1.02</b>              | <b>1.25</b>              | <b>0.02</b>      | Fair              |
| hospitalized with COVID-19<br>(Asian-Pakistani)**   | Public Health England (UK;<br>rc) | 130,091                           | <b>aHR 1.44</b>            | <b>1.31</b>              | <b>1.58</b>              | <b>&lt;0.001</b> | Fair              |

\* values are adjusted odds ratio, unless otherwise denoted

\*\*Findings were similar for ethnicity analyses stratified by age category, thus only results for the full sample are shown

aHR: adjusted hazards ratio; aRR: adjusted risk ratio; CI: confidence interval; COVID-19: novel coronavirus disease 2019; ICU: intensive care unit; NR: not reported; pc: prospective cohort; rc: retrospective cohort; UK: United Kingdom; USA: United States of America; vs.: versus

Table 15. Occupation

| Risk factor;<br>Outcome among<br>population                                           | Study                               | Total<br>number of<br>patients | Adjusted<br>odds<br>ratio* | 95% CI<br>lower<br>bound | 95% CI<br>upper<br>bound | p-value | Quality<br>rating |
|---------------------------------------------------------------------------------------|-------------------------------------|--------------------------------|----------------------------|--------------------------|--------------------------|---------|-------------------|
| <b>Healthcare workers: laryngologist/intubator vs. assistant</b>                      |                                     |                                |                            |                          |                          |         |                   |
| <b>Hospitalization</b>                                                                |                                     |                                |                            |                          |                          |         |                   |
| healthcare workers<br>performing tracheal<br>intubations on patients with<br>COVID-19 | Ei-Boghdady (Multi-<br>country; pc) | 1,718                          | aHR 0.76                   | 0.56                     | 1.04                     | 0.08    | Good              |

\* values are adjusted odds ratio, unless otherwise denoted

aHR: adjusted hazards ratio; CI: confidence interval; COVID-19: novel coronavirus disease 2019; pc: prospective cohort; vs.: versus

Table 16. Gender identity/sex

| Risk factor;<br>Outcome among<br>population                                  | Study                           | Total<br>number<br>of<br>patients | Adjusted<br>odds<br>ratio* | 95% CI<br>lower<br>bound | 95% CI<br>upper<br>bound | p-value          | Quality<br>rating |
|------------------------------------------------------------------------------|---------------------------------|-----------------------------------|----------------------------|--------------------------|--------------------------|------------------|-------------------|
| <b>Male vs. female</b>                                                       |                                 |                                   |                            |                          |                          |                  |                   |
| <b>Hospitalization</b>                                                       |                                 |                                   |                            |                          |                          |                  |                   |
| community sample                                                             | Patel AP (UK; pc)               | 418,794                           | <b>1.37</b>                | <b>1.12</b>              | <b>1.66</b>              | <b>0.00</b>      | Fair              |
| community sample                                                             | Lassale C (UK; pc)              | 340,966                           | 1.15                       | 0.92                     | 1.44                     | 0.219            | Fair              |
| positive for COVID-19                                                        | Azar K (USA; rc)                | 1052                              | <b>1.94</b>                | <b>1.33</b>              | <b>2.81</b>              | <b>&lt;0.01</b>  | Good              |
| positive for COVID-19                                                        | Petrilli CM (USA; pc)           | 5,279                             | <b>2.67</b>                | <b>2.39</b>              | <b>3.2</b>               | <b>&lt;0.001</b> | Good              |
| positive for COVID-19                                                        | Price-Haywood EG (USA; rc)      | 3,481                             | <b>1.79</b>                | <b>1.54</b>              | <b>2.08</b>              | NR               | Good              |
| healthcare workers performing tracheal intubations on patients with COVID-19 | El-Boghdady (Multi-country; pc) | 1,718                             | <b>aHR 0.74</b>            | <b>0.55</b>              | <b>0.99</b>              | <b>0.04</b>      | Good              |
| <b>Severe disease</b>                                                        |                                 |                                   |                            |                          |                          |                  |                   |
| hospitalized with COVID-19                                                   | Colaneri M (Italy; rc)          | 44                                | 17.24                      | 0.50                     | 1000.00                  | 0.1148           | Good              |
| hospitalized with COVID-19                                                   | Petrilli CM (USA; pc)           | 2,725                             | 1.06                       | 0.85                     | 1.3                      | 0.6              | Good              |
| death or transfer to the ICU (composite) among hospitalized for COVID-19     | Piano S (Italy; rc)             | 565                               | 1.42                       | 0.8                      | 2.52                     | 0.236            | Good              |
| <b>ICU admission</b>                                                         |                                 |                                   |                            |                          |                          |                  |                   |
| hospitalized with COVID-19                                                   | Busetto L (Italy; rc)           | 92                                | 0.54                       | 0.19                     | 1.52                     | 0.24             | Fair              |
| hospitalized with COVID-19                                                   | Kalligeros M (USA; rc)          | 103                               | 2.4                        | 0.87                     | 6.64                     | 0.09             | Good              |
| <b>Mechanical ventilation</b>                                                |                                 |                                   |                            |                          |                          |                  |                   |
| hospitalized with COVID-19                                                   | Busetto L (Italy; rc)           | 92                                | 1.22                       | 0.47                     | 3.17                     | 0.682            | Fair              |
| hospitalized with COVID-19                                                   | Hur K (USA; rc)                 | 486                               | <b>1.69</b>                | <b>1.04</b>              | <b>2.77</b>              | <b>0.034</b>     | Good              |
| hospitalized with COVID-19                                                   | Kalligeros M (USA; rc)          | 103                               | 1.13                       | 0.32                     | 3.4                      | 0.825            | Good              |
| hospitalized with COVID-19                                                   | Palaiodimos L (USA; rc)         | 200                               | <b>3.35</b>                | <b>1.51</b>              | <b>7.46</b>              | <b>0.003</b>     | Good              |
| <b>Mortality</b>                                                             |                                 |                                   |                            |                          |                          |                  |                   |
| hospitalized with COVID-19                                                   | Bianchetti A (Italy; rc)        | 627                               | 1.15                       | 0.79                     | 1.67                     | >0.05            | Fair              |
| hospitalized with COVID-19                                                   | Borobia A (Spain; rc)           | 2,226                             | <b>1.82</b>                | <b>1.27</b>              | <b>2.63</b>              | <b>0.002</b>     | Fair              |
| hospitalized with COVID-19                                                   | Busetto L (Italy; rc)           | 92                                | 2.51                       | 0.37                     | 16.94                    | 0.346            | Fair              |
| hospitalized with COVID-19                                                   | Cummings MJ (USA; pc)           | 257                               | aHR 1.13                   | 0.71                     | 1.81                     | NR               | Good              |
| hospitalized with COVID-19                                                   | Giacomelli A (Italy; pc)        | 233                               | aHR 1.42                   | 0.62                     | 3.28                     | 0.409            | Good              |
| hospitalized with COVID-19                                                   | Palaiodimos L (USA; rc)         | 200                               | <b>2.74</b>                | <b>1.25</b>              | <b>5.98</b>              | <b>0.011</b>     | Good              |
| hospitalized with COVID-19                                                   | Petrilli CM (USA; pc)           | 2,725                             | 0.92                       | 0.77                     | 1.11                     | 0.39             | Good              |
| hospitalized with COVID-19                                                   | Docherty AB (UK; pc)            | 20,133                            | <b>aHR 1.23</b>            | <b>1.16</b>              | <b>1.33</b>              | <b>&lt;0.001</b> | Good              |
| hospitalized with COVID-19                                                   | Price-Haywood EG (USA; rc)      | 1,382                             | aHR 1.14                   | 0.88                     | 1.47                     | NR               | Good              |
| hospitalized with COVID-19 (20-64 years)                                     | Public Health England (UK; rc)  | 64,961                            | aHR 1.99                   | 1.85                     | 2.14                     | <0.001           | Fair              |
| hospitalized with COVID-19 (>64 years)                                       | Public Health England (UK; rc)  | 63,094                            | aHR 1.47                   | 1.44                     | 1.51                     | <0.001           | Fair              |

\* values are adjusted odds ratio, unless otherwise denoted



\*\* the reference category differs slightly across studies

aHR: adjusted hazards ratio; CI: confidence interval; COVID-19: novel coronavirus disease 2019; ICU: intensive care unit; NR: not reported; pc: prospective cohort; rc: retrospective cohort; UK: United Kingdom; USA: United States of America; vs.: versus

**Table 17. Education/literacy level**

| Risk factor;<br>Outcome among<br>population  | Study              | Total<br>number of<br>patients | Adjusted<br>odds<br>ratio* | 95% CI<br>lower<br>bound | 95% CI<br>upper<br>bound | p-value | Quality<br>rating |
|----------------------------------------------|--------------------|--------------------------------|----------------------------|--------------------------|--------------------------|---------|-------------------|
| <b>Lower education vs. university degree</b> |                    |                                |                            |                          |                          |         |                   |
| <b>Hospitalization</b>                       |                    |                                |                            |                          |                          |         |                   |
| community sample                             | Lassale C (UK; pc) | 340,966                        | 1.15                       | 0.96                     | 1.37                     | 0.131   | Fair              |

\* values are adjusted odds ratio, unless otherwise denoted

CI: confidence interval; pc: prospective cohort; UK: United Kingdom

Table 18. Socioeconomic status

| Risk factor;<br>Outcome among<br>population                | Study                          | Total<br>number<br>of<br>patients | Adjusted<br>odds<br>ratio* | 95% CI<br>lower<br>bound | 95% CI<br>upper<br>bound | p-value          | Quality<br>rating |
|------------------------------------------------------------|--------------------------------|-----------------------------------|----------------------------|--------------------------|--------------------------|------------------|-------------------|
| <b>Material deprivation (Q2 vs. Q1 least deprived)</b>     |                                |                                   |                            |                          |                          |                  |                   |
| <b>Hospitalization (Townsend Index**)</b>                  |                                |                                   |                            |                          |                          |                  |                   |
| community sample                                           | Lassale C (UK; pc)             | 340,966                           | 1                          | 0.76                     | 1.33                     | 0.989            | Fair              |
| <b>Mortality (Index of Multiple Deprivation***)</b>        |                                |                                   |                            |                          |                          |                  |                   |
| Hospitalized                                               | Public Health England (UK; rc) | 130,091                           | <b>aHR 1.93</b>            | <b>1.70</b>              | <b>2.19</b>              | <b>&lt;0.001</b> | Fair              |
| <b>Town Material deprivation (Q3 vs. Q1)</b>               |                                |                                   |                            |                          |                          |                  |                   |
| <b>Hospitalization (Townsend Index)</b>                    |                                |                                   |                            |                          |                          |                  |                   |
| community sample                                           | Lassale C (UK; pc)             | 340,966                           | 0.99                       | 0.75                     | 1.31                     | 0.937            | Fair              |
| <b>Mortality (Index of Multiple Deprivation)</b>           |                                |                                   |                            |                          |                          |                  |                   |
| Hospitalized                                               | Public Health England (UK; rc) | 130,091                           | <b>aHR 1.65</b>            | <b>1.46</b>              | <b>1.88</b>              | <b>&lt;0.001</b> | Fair              |
| <b>Material deprivation (Q4 vs. Q1)</b>                    |                                |                                   |                            |                          |                          |                  |                   |
| <b>Hospitalization (Townsend Index)</b>                    |                                |                                   |                            |                          |                          |                  |                   |
| community sample                                           | Lassale C (UK; pc)             | 340,966                           | 1.24                       | 0.95                     | 1.62                     | 0.116            | Fair              |
| <b>Mortality (Index of Multiple Deprivation)</b>           |                                |                                   |                            |                          |                          |                  |                   |
| Hospitalized                                               | Public Health England (UK; rc) | 130,091                           | <b>aHR 1.38</b>            | <b>1.21</b>              | <b>1.57</b>              | <b>&lt;0.001</b> | Fair              |
| <b>Material deprivation (Q5 vs. Q1)</b>                    |                                |                                   |                            |                          |                          |                  |                   |
| <b>Hospitalization (Townsend Index)</b>                    |                                |                                   |                            |                          |                          |                  |                   |
| community sample                                           | Lassale C (UK; pc)             | 340,966                           | <b>1.67</b>                | <b>1.3</b>               | <b>2.16</b>              | <b>&lt;0.001</b> | Fair              |
| <b>Mortality (Index of Multiple Deprivation)</b>           |                                |                                   |                            |                          |                          |                  |                   |
| Hospitalized                                               | Public Health England (UK; rc) | 130,091                           | <b>aHR 1.32</b>            | <b>1.15</b>              | <b>1.52</b>              | <b>&lt;0.001</b> | Fair              |
| <b>Townsend index (continuous)</b>                         |                                |                                   |                            |                          |                          |                  |                   |
| <b>Hospitalization</b>                                     |                                |                                   |                            |                          |                          |                  |                   |
| community sample                                           | Patel AP (UK; pc)              | 418,794                           | <b>1.09</b>                | <b>1.05</b>              | <b>1.12</b>              | <b>&lt;0.001</b> | Fair              |
| <b>Average income (continuous)</b>                         |                                |                                   |                            |                          |                          |                  |                   |
| <b>Hospitalization</b>                                     |                                |                                   |                            |                          |                          |                  |                   |
| community sample                                           | Patel AP (UK; pc)              | 418,794                           | 1.01                       | 0.92                     | 1.11                     | 0.76             | Fair              |
| <b>Income percentile (26th to 50th vs. 25th and below)</b> |                                |                                   |                            |                          |                          |                  |                   |
| <b>Hospitalization</b>                                     |                                |                                   |                            |                          |                          |                  |                   |
| positive for COVID-19                                      | Azar K (USA; rc)               | 1,052                             | 1.2                        | 0.76                     | 1.9                      | >0.05            | Good              |
| <b>Income percentile (51st to 75th vs. 25th and below)</b> |                                |                                   |                            |                          |                          |                  |                   |
| <b>Hospitalization</b>                                     |                                |                                   |                            |                          |                          |                  |                   |
| positive for COVID-19                                      | Azar K (USA; rc)               | 1,052                             | <b>0.24</b>                | <b>0.12</b>              | <b>0.46</b>              | <b>&lt;0.001</b> | Good              |
| <b>Income percentile (&gt;=75th vs. 25th and below)</b>    |                                |                                   |                            |                          |                          |                  |                   |
| <b>Hospitalization</b>                                     |                                |                                   |                            |                          |                          |                  |                   |
| positive for COVID-19                                      | Azar K (USA; rc)               | 1,052                             | <b>0.55</b>                | <b>0.33</b>              | <b>0.91</b>              | <b>&lt;0.05</b>  | Good              |

\* values are adjusted odds ratio, unless otherwise denoted

\*\* Townsend index incorporates unemployment, car & home (non-)ownership & household crowding

\*\*\* Index of Multiple Deprivation is used within the UK and incorporates income, employment, education, health, crime, barriers to housing and services, and living environment

aHR: adjusted hazards ratio; CI: confidence interval; COVID-19: novel coronavirus disease 2019; pc: prospective cohort; Q1-5: quartile (first to fifth); rc: retrospective cohort; UK: United Kingdom; USA: United States of America; vs.: versus

Table 19. Age

| Risk factor;<br>Outcome among<br>population                               | Study                      | Total<br>number<br>of<br>patients | Adjusted<br>odds<br>ratio* | 95% CI<br>lower<br>bound | 95% CI<br>upper<br>bound | p-value | Quality<br>rating |
|---------------------------------------------------------------------------|----------------------------|-----------------------------------|----------------------------|--------------------------|--------------------------|---------|-------------------|
| <b>Age (continuous or incremental)</b>                                    |                            |                                   |                            |                          |                          |         |                   |
| <b>Hospitalization</b>                                                    |                            |                                   |                            |                          |                          |         |                   |
| community sample                                                          | Lassale C (UK; pc)         | 340,966                           | 1.02                       | 1.01                     | 1.03                     | 0.003   | Fair              |
| community sample                                                          | Patel AP (UK; pc)          | 418,794                           | 1.02                       | 1                        | 1.03                     | 0.02    | Fair              |
| positive for COVID-19                                                     | Price-Haywood EG (USA; rc) | 3,481                             | 1.29                       | 1.25                     | 1.33                     | NR      | Good              |
| <b>ICU admission</b>                                                      |                            |                                   |                            |                          |                          |         |                   |
| hospitalized with COVID-19                                                | Busetto L (Italy; rc)      | 92                                | 0.97                       | 0.93                     | 1.01                     | 0.18    | Fair              |
| hospitalized with COVID-19                                                | Hajifathalian K (USA; rc)  | 770                               | aRR 1.01                   | 1.01                     | 1.02                     | 0.123   | Fair              |
| hospitalized with COVID-19                                                | Kalligeros M (USA; rc)     | 103                               | 1.03                       | 1                        | 1.07                     | 0.059   | Good              |
| <b>Mechanical ventilation</b>                                             |                            |                                   |                            |                          |                          |         |                   |
| hospitalized with COVID-19                                                | Busetto L (Italy; rc)      | 92                                | 0.97                       | 0.93                     | 1                        | 0.091   | Fair              |
| hospitalized with COVID-19                                                | Hajifathalian K (USA; rc)  | 770                               | aRR 1.01                   | 0.99                     | 1.01                     | 0.43    | Fair              |
| hospitalized with COVID-19                                                | Kalligeros M (USA; rc)     | 103                               | 1.02                       | 0.98                     | 1.06                     | 0.271   | Good              |
| hospitalized with COVID-19 (quartiles of age)                             | Palaiodimos L (USA; rc)    | 200                               | 1.5                        | 1.05                     | 2.12                     | 0.025   | Good              |
| <b>Severe disease</b>                                                     |                            |                                   |                            |                          |                          |         |                   |
| positive for COVID-19                                                     | Hajifathalian K (USA; rc)  | 1,059                             | 1.03                       | NR                       | NR                       | <0.001  | Fair              |
| death or transfer to the ICU (composite) among hospitalized with COVID-19 | Piano S (Italy)            | 565                               | 1.03                       | 1.01                     | 1.05                     | 0.012   | Good              |
| <b>Mortality</b>                                                          |                            |                                   |                            |                          |                          |         |                   |
| hospitalized with COVID-19                                                | Busetto L (Italy; rc)      | 92                                | 1.21                       | 1.05                     | 1.39                     | 0.007   | Fair              |
| hospitalized with COVID-19                                                | Perez-Guzman PN (UK; rc)   | 520                               | 2.16                       | 1.5                      | 3.12                     | <0.01   | Good              |
| hospitalized with COVID-19                                                | Violi F (Italy; rc)        | 319                               | aHR 1.03                   | 1.01                     | 1.06                     | 0.001   | Good              |
| hospitalized with COVID-19                                                | Hajifathalian K (USA; rc)  | 770                               | aRR 1.06                   | 1.04                     | 1.08                     | <0.001  | Fair              |
| hospitalized with COVID-19                                                | Borobia A (Spain; rc)      | 2,226                             | 1.11                       | 1.09                     | 1.12                     | <0.001  | Fair              |
| hospitalized with COVID-19                                                | Bianchetti A (Italy; rc)   | 627                               | 1.09                       | 1.07                     | 1.12                     | <0.001  | Fair              |
| hospitalized with COVID-19                                                | Okoh A (USA; rc)           | 251                               | 1.04                       | 1.01                     | 1.06                     | 0.003   | Good              |
| hospitalized with COVID-19                                                | Palaiodimos L (USA; rc)    | 200                               | 1.73                       | 1.13                     | 5.98                     | 0.011   | Good              |
| hospitalized with COVID-19 (5-year increase)                              | Price-Haywood EG (USA; rc) | 1,382                             | aHR 1.18                   | 1.13                     | 1.24                     | NR      | Good              |
| hospitalized with COVID-19 (10-year increase)                             | Cummings MJ (USA; pc)      | 257                               | aHR 1.31                   | 1.09                     | 1.57                     | NR      | Good              |
| hospitalized with COVID-19 (10-year increase)                             | Giacomelli A (Italy; pc)   | 233                               | aHR 2.08                   | 1.48                     | 2.9                      | <0.0001 | Good              |
| <b>45-54 vs. ≤45 years old**</b>                                          |                            |                                   |                            |                          |                          |         |                   |
| <b>Hospitalization</b>                                                    |                            |                                   |                            |                          |                          |         |                   |
| positive for COVID-19                                                     | Azar K (USA; rc)           | 1,052                             | 2.24                       | 1.13                     | 4.43                     | <0.05   | Good              |
| positive for COVID-19                                                     | Petrilli CM (USA; pc)      | 5,279                             | 2.14                       | 1.76                     | 2.59                     | <0.001  | Good              |
| <b>Severe Disease</b>                                                     |                            |                                   |                            |                          |                          |         |                   |

| Risk factor;<br>Outcome among<br>population | Study                          | Total<br>number<br>of<br>patients | Adjusted<br>odds<br>ratio* | 95% CI<br>lower<br>bound | 95% CI<br>upper<br>bound | p-value          | Quality<br>rating |
|---------------------------------------------|--------------------------------|-----------------------------------|----------------------------|--------------------------|--------------------------|------------------|-------------------|
| hospitalized with COVID-19                  | Petrilli CM (USA; pc)          | 2,725                             | 0.78                       | 0.54                     | 1.1                      | 0.21             | Good              |
| <b>Mortality</b>                            |                                |                                   |                            |                          |                          |                  |                   |
| hospitalized with COVID-19                  | Petrilli CM (USA; pc)          | 2,725                             | <b>1.95</b>                | <b>1.16</b>              | <b>3.31</b>              | <b>0.01</b>      | Good              |
| hospitalized with COVID-19                  | Public Health England (UK; rc) | 64,961                            | <b>aHR 3.33</b>            | <b>2.79</b>              | <b>3.99</b>              | <b>&lt;0.001</b> | Fair              |
| <b>50-64 vs. ≤45 years old**</b>            |                                |                                   |                            |                          |                          |                  |                   |
| <b>Hospitalization</b>                      |                                |                                   |                            |                          |                          |                  |                   |
| positive for COVID-19                       | Azar K (USA; rc)               | 1,052                             | <b>2.62</b>                | <b>1.37</b>              | <b>4.99</b>              | <b>&lt;0.01</b>  | Good              |
| positive for COVID-19                       | Petrilli CM (USA; pc)          | 5,279                             | <b>3.67</b>                | <b>3.01</b>              | <b>4.48</b>              | <b>&lt;0.001</b> | Good              |
| <b>Severe disease</b>                       |                                |                                   |                            |                          |                          |                  |                   |
| hospitalized with COVID-19                  | Petrilli CM (USA; pc)          | 2,725                             | 1.32                       | 0.93                     | 1.9                      | 0.12             | Good              |
| <b>Mortality</b>                            |                                |                                   |                            |                          |                          |                  |                   |
| hospitalized with COVID-19                  | Docherty AB (UK; pc)           | 20,133                            | <b>aHR 2.63</b>            | <b>2.06</b>              | <b>3.35</b>              | <b>&lt;0.001</b> | Good              |
| hospitalized with COVID-19                  | Petrilli CM (USA; pc)          | 2,725                             | <b>3.18</b>                | <b>1.93</b>              | <b>5.21</b>              | <b>&lt;0.001</b> | Good              |
| hospitalized with COVID-19                  | Public Health England (UK; rc) | 64,961                            | <b>aHR 8.94</b>            | <b>7.61</b>              | <b>10.5</b>              | <b>&lt;0.001</b> | Fair              |
| <b>&gt;60 vs. ≤45 years old</b>             |                                |                                   |                            |                          |                          |                  |                   |
| <b>Hospitalization</b>                      |                                |                                   |                            |                          |                          |                  |                   |
| positive for COVID-19                       | Azar K (USA; rc)               | 1,052                             | <b>4.62</b>                | <b>2.39</b>              | <b>9.95</b>              | <b>&lt;0.001</b> | Good              |
| positive for COVID-19                       | Petrilli CM (USA; pc)          | 5,279                             | <b>8.7</b>                 | <b>6.77</b>              | <b>11.22</b>             | <b>&lt;0.001</b> | Good              |
| <b>Severe disease</b>                       |                                |                                   |                            |                          |                          |                  |                   |
| hospitalized with COVID-19                  | Petrilli CM (USA; pc)          | 2,725                             | <b>1.73</b>                | <b>1.19</b>              | <b>2.5</b>               | <b>0.004</b>     | Good              |
| <b>Mechanical ventilation</b>               |                                |                                   |                            |                          |                          |                  |                   |
| hospitalized with COVID-19                  | Hur K (USA; rc)                | 486                               | <b>3.9</b>                 | <b>2.3</b>               | <b>6.76</b>              | <b>&lt;0.001</b> | Good              |
| <b>Mortality</b>                            |                                |                                   |                            |                          |                          |                  |                   |
| hospitalized with COVID-19                  | Imam (USA; rc)                 | 1,305                             | <b>1.93</b>                | <b>1.26</b>              | <b>2.94</b>              | <b>0.002</b>     | Fair              |
| hospitalized with COVID-19                  | Docherty AB (UK; pc)           | 20,133                            | <b>aHR 4.99</b>            | <b>3.99</b>              | <b>6.25</b>              | <b>&lt;0.001</b> | Good              |
| hospitalized with COVID-19                  | Petrilli CM (USA; pc)          | 2,725                             | <b>4.83</b>                | <b>2.93</b>              | <b>7.96</b>              | <b>&lt;0.001</b> | Good              |
| hospitalized with COVID-19                  | Public Health England (UK; rc) | 64,961                            | <b>aHR</b>                 | <b>19.01</b>             | <b>16.18</b>             | <b>22.35</b>     | <b>&lt;0.001</b>  |
| <b>&gt;70 vs. ≤45 years old</b>             |                                |                                   |                            |                          |                          |                  |                   |
| <b>Hospitalization</b>                      |                                |                                   |                            |                          |                          |                  |                   |
| positive for COVID-19                       | Azar K (USA; rc)               | 1,052                             | <b>5.68</b>                | <b>2.6</b>               | <b>12.38</b>             | <b>&lt;0.001</b> | Good              |
| positive for COVID-19                       | Petrilli CM (USA; pc)          | 5,279                             | <b>37.87</b>               | <b>26.1</b>              | <b>56.03</b>             | <b>&lt;0.001</b> | Good              |
| <b>Severe disease</b>                       |                                |                                   |                            |                          |                          |                  |                   |
| hospitalized with COVID-19                  | Petrilli CM (USA; pc)          | 2,725                             | <b>2.32</b>                | <b>1.57</b>              | <b>3.4</b>               | <b>&lt;0.001</b> | Good              |
| <b>Mortality</b>                            |                                |                                   |                            |                          |                          |                  |                   |
| hospitalized with COVID-19                  | Petrilli CM (USA; pc)          | 2,725                             | <b>7.69</b>                | <b>4.6</b>               | <b>12.84</b>             | <b>&lt;0.001</b> | Good              |
| hospitalized with COVID-19                  | Docherty AB (UK; pc)           | 20,133                            | <b>aHR 8.51</b>            | <b>6.85</b>              | <b>10.57</b>             | <b>&lt;0.001</b> | Good              |
| <b>&gt;80 vs. ≤45 years old</b>             |                                |                                   |                            |                          |                          |                  |                   |

| Risk factor;<br>Outcome among<br>population | Study                          | Total<br>number<br>of<br>patients | Adjusted<br>odds<br>ratio* | 95% CI<br>lower<br>bound | 95% CI<br>upper<br>bound | p-value          | Quality<br>rating |
|---------------------------------------------|--------------------------------|-----------------------------------|----------------------------|--------------------------|--------------------------|------------------|-------------------|
| <b>Hospitalization</b>                      |                                |                                   |                            |                          |                          |                  |                   |
| positive for COVID-19                       | Azar K (USA; rc)               | 1,052                             | <b>19.08</b>               | <b>7.86</b>              | <b>46.32</b>             | <b>&lt;0.001</b> | Good              |
| <b>Mortality</b>                            |                                |                                   |                            |                          |                          |                  |                   |
| hospitalized w with COVID-19                | Docherty AB (UK; pc)           | 20,133                            | <b>aHR 11.09</b>           | <b>8.93</b>              | <b>13.77</b>             | <b>&lt;0.001</b> | Good              |
| <b>70-79 vs. 65-69 years old</b>            |                                |                                   |                            |                          |                          |                  |                   |
| <b>Mortality</b>                            |                                |                                   |                            |                          |                          |                  |                   |
| hospitalized w with COVID-19                | Public Health England (UK; rc) | 63,094                            | <b>aHR 1.55</b>            | <b>1.47</b>              | <b>1.64</b>              | <b>&lt;0.001</b> | Fair              |
| <b>80-89 vs. 65-69 years old</b>            |                                |                                   |                            |                          |                          |                  |                   |
| <b>Mortality</b>                            |                                |                                   |                            |                          |                          |                  |                   |
| hospitalized w with COVID-19                | Public Health England (UK; rc) | 63,094                            | <b>aHR 2.15</b>            | <b>2.05</b>              | <b>2.26</b>              | <b>&lt;0.001</b> | Fair              |

\* values are adjusted odds ratio, unless otherwise denoted

\*\* the reference category differs slightly across studies

aHR: adjusted hazards ratio; CI: confidence interval; COVID-19: novel coronavirus disease 2019; ICU: intensive care unit; NR: not reported; pc: prospective cohort; rc: retrospective cohort; UK: United Kingdom; USA: United States of America; vs.: versus

Table 20. Other factors

| Risk factor;<br>Outcome among<br>population                    | Study                   | Total<br>number of<br>patients | Adjusted<br>odds<br>ratio* | 95% CI<br>lower<br>bound | 95% CI<br>upper<br>bound | p-value          | Quality<br>rating |
|----------------------------------------------------------------|-------------------------|--------------------------------|----------------------------|--------------------------|--------------------------|------------------|-------------------|
| <b>Smoking (current vs. never)</b>                             |                         |                                |                            |                          |                          |                  |                   |
| <b>Hospitalization</b>                                         |                         |                                |                            |                          |                          |                  |                   |
| positive for COVID-19                                          | Azar K (USA; rc)        | 1,052                          | 0.92                       | 0.31                     | 2.70                     | >0.05            | Good              |
| community sample                                               | Hamer (UK; pc)          | 387,109                        | <b>aRR 1.36</b>            | <b>1.08</b>              | <b>1.71</b>              | <b>NR</b>        | Fair              |
| community sample                                               | Lassale C (UK; pc)      | 340,966                        | 1.25                       | 0.96                     | 1.62                     | 0.095            | Fair              |
| community sample                                               | Patel AP (UK; pc)       | 418,794                        | 0.91                       | 0.66                     | 1.25                     | 0.55             | Fair              |
| positive for COVID-19                                          | Petrilli CM (USA; pc)   | 5,279                          | <b>0.59</b>                | <b>0.43</b>              | <b>0.81</b>              | <b>0.001</b>     | Good              |
| <b>Severe disease</b>                                          |                         |                                |                            |                          |                          |                  |                   |
| hospitalized with COVID-19                                     | Petrilli CM (USA; pc)   | 2,725                          | 0.82                       | 0.53                     | 1.3                      | 0.39             | Good              |
| <b>Mortality</b>                                               |                         |                                |                            |                          |                          |                  |                   |
| hospitalized with COVID-19                                     | Petrilli CM (USA; pc)   | 2,725                          | 0.92                       | 0.62                     | 1.38                     | 0.69             | Good              |
| <b>Smoking (former vs. never)</b>                              |                         |                                |                            |                          |                          |                  |                   |
| <b>Hospitalization</b>                                         |                         |                                |                            |                          |                          |                  |                   |
| community sample                                               | Hamer (UK; pc)          | 387,109                        | <b>aRR 1.36</b>            | <b>1.15</b>              | <b>1.59</b>              | <b>NR</b>        | Fair              |
| community sample                                               | Lassale C (UK; pc)      | 340,966                        | <b>1.3</b>                 | <b>1.1</b>               | <b>1.55</b>              | <b>0.003</b>     | Fair              |
| positive for COVID-19                                          | Petrilli CM (USA; pc)   | 5,279                          | <b>0.69</b>                | <b>0.56</b>              | <b>0.85</b>              | <b>&lt;0.001</b> | Good              |
| <b>Severe disease</b>                                          |                         |                                |                            |                          |                          |                  |                   |
| hospitalized with COVID-19                                     | Petrilli CM (USA; pc)   | 2,725                          | 1.05                       | 0.82                     | 1.3                      | 0.72             | Good              |
| <b>Mechanical ventilation</b>                                  |                         |                                |                            |                          |                          |                  |                   |
| hospitalized with COVID-19                                     | Petrilli CM (USA; pc)   | 2,725                          | 1.05                       | 0.82                     | 1.3                      | 0.72             | Good              |
| <b>Mortality</b>                                               |                         |                                |                            |                          |                          |                  |                   |
| hospitalized with COVID-19                                     | Petrilli CM (USA; pc)   | 2,725                          | 1.07                       | 0.88                     | 1.31                     | 0.49             | Good              |
| hospitalized with COVID-19                                     | Palaiodimos L (USA; rc) | 200                            | 0.83                       | 0.37                     | 1.87                     | 0.647            | Good              |
| <b>Smoking (former vs. current)</b>                            |                         |                                |                            |                          |                          |                  |                   |
| <b>Hospitalization</b>                                         |                         |                                |                            |                          |                          |                  |                   |
| positive for COVID-19                                          | Azar K (USA; rc)        | 1,052                          | 0.77                       | 0.25                     | 2.35                     | >0.05            | Good              |
| <b>Alcohol consumption (continuous)</b>                        |                         |                                |                            |                          |                          |                  |                   |
| <b>Hospitalization</b>                                         |                         |                                |                            |                          |                          |                  |                   |
| community sample                                               | Patel AP (UK; pc)       | 418,794                        | 1.04                       | 0.98                     | 1.11                     | 0.21             | Fair              |
| <b>Alcohol consumption (never/rarely vs. within guideline)</b> |                         |                                |                            |                          |                          |                  |                   |
| <b>Hospitalization</b>                                         |                         |                                |                            |                          |                          |                  |                   |
| community sample                                               | Hamer (UK; pc)          | 387,109                        | <b>aRR 1.57</b>            | <b>1.31</b>              | <b>1.88</b>              | <b>NR</b>        | Fair              |
| community sample                                               | Lassale C (UK; pc)      | 340,966                        | <b>1.3</b>                 | <b>1.07</b>              | <b>1.59</b>              | <b>0.01</b>      | Fair              |
| <b>Alcohol consumption (above vs. within guideline)</b>        |                         |                                |                            |                          |                          |                  |                   |
| <b>Hospitalization</b>                                         |                         |                                |                            |                          |                          |                  |                   |
| community sample                                               | Hamer (UK; pc)          | 387,109                        | <b>aRR 1.24</b>            | <b>1.03</b>              | <b>1.5</b>               | <b>NR</b>        | Fair              |
| community sample                                               | Lassale C (UK; pc)      | 340,966                        | 1.1                        | 0.9                      | 1.34                     | 0.368            | Fair              |
| <b>Rarely/never active vs. below guideline</b>                 |                         |                                |                            |                          |                          |                  |                   |



| <b>Hospitalization</b>                                                          |                    |         |                 |             |             |              |      |
|---------------------------------------------------------------------------------|--------------------|---------|-----------------|-------------|-------------|--------------|------|
| community sample                                                                | Hamer (UK; pc)     | 387,109 | aRR 0.99        | 0.84        | 1.18        | NR           | Fair |
| <b>Rarely/never active vs. meeting guideline</b>                                |                    |         |                 |             |             |              |      |
| <b>Hospitalization</b>                                                          |                    |         |                 |             |             |              |      |
| community sample                                                                | Lassale C (UK; pc) | 340,966 | <b>1.22</b>     | <b>1</b>    | <b>1.48</b> | <b>0.049</b> | Fair |
| <b>Some activity (&gt;10 minutes but below guideline) vs. meeting guideline</b> |                    |         |                 |             |             |              |      |
| <b>Hospitalization</b>                                                          |                    |         |                 |             |             |              |      |
| community sample                                                                | Lassale C (UK; pc) | 340,966 | 0.93            | 0.77        | 1.13        | 0.466        | Fair |
| <b>Exceeding vs. meeting guideline</b>                                          |                    |         |                 |             |             |              |      |
| <b>Hospitalization</b>                                                          |                    |         |                 |             |             |              |      |
| community sample                                                                | Hamer (UK; pc)     | 387,109 | <b>aRR 1.24</b> | <b>1.03</b> | <b>1.5</b>  | <b>NR</b>    | Fair |

\* values are adjusted odds ratio, unless otherwise denoted

\*\* the reference category differs slightly across studies

aHR: adjusted hazards ratio; aRR: adjusted risk ratio; CI: confidence interval; COVID-19: novel coronavirus disease 2019; ICU: intensive care unit; NR: not reported; pc: prospective cohort; rc: retrospective cohort; UK: United Kingdom; USA: United States of America; vs.: versus
